# Supplementary material for: Selective loss of CD107a TIGIT+ memory HIV-1-specific CD8+ T cells in PLWH over a decade of ART
Source: eLife. 2023 Sep 19;12:e83737. doi: 10.7554/eLife.83737 (PMC10508883; doi:10.7554/eLife.83737)
Supplement: Figure 1—source data 1. [file elife-83737-fig1-data1.xlsx]

## Sheet: Demographics data
Patients	Group	Age	Gender (M/W)	Years_from_seroconversion	Years_undetectable	Viral Load_log	CD4
EI1	Ei	50.2259	M	0.0273973	NA	5.41658	538
EI10	Ei	43.0938	M	1.51233	NA	4.23045	539
EI11	Ei	41.0704	M	0.0136986	NA	5.17609	778
EI12	Ei	46.2834	M	0	NA	4.43532	760
EI13	Ei	47.2471	M	1.93151	NA	4.44716	647
EI14	Ei	55.4853	M	0.0712329	NA	5.43136	505
EI15	Ei	54.5707	M	0.408219	NA	4.07918	769
EI16	Ei	41.8753	M	0	NA	4.29321	749
EI17	Ei	42.9569	M	0.0164384	NA	4.11394	635
EI18	Ei	40.7911	M	0.0191781	NA	4.66276	643
EI19	Ei	41.9986	M	0.0191781	NA	5.24298	785
EI2	Ei	53.3469	W	0.808219	NA	4.27875	600
EI20	Ei	41.8207	M	0.0246575	NA	4.17609	517
EI21	Ei	42.5214	M	0.0246575	NA	5.27811	704
EI22	Ei	40.3558	M	0.0273973	NA	5.38021	640
EI23	Ei	41.6181	M	0.0767123	NA	4.44716	625
EI24	Ei	40.1588	M	0.893151	NA	4.57978	801
EI3	Ei	44.8022	M	0	NA	5.20412	556
EI4	Ei	43.5483	M	0.0164384	NA	4.87844	560
EI5	Ei	45.2129	M	0.0328767	NA	4.80618	549
EI6	Ei	43.8549	M	0.0767123	NA	4.57978	766
EI7	Ei	44.4216	M	0.263014	NA	4.6902	573
EI8	Ei	42.9595	M	0.0136986	NA	4.61278	607
EI9	Ei	45.952	M	1.47397	NA	4.5682	608
HC1	HC	52.6	M	NA	NA	NA	NA
HC10	HC	48.5534	M	NA	NA	NA	NA
HC11	HC	29.0247	M	NA	NA	NA	NA
HC12	HC	56.463	M	NA	NA	NA	NA
HC13	HC	38.0384	M	NA	NA	NA	NA
HC14	HC	43.2658	M	NA	NA	NA	NA
HC15	HC	28.1014	M	NA	NA	NA	NA
HC16	HC	57.3616	M	NA	NA	NA	NA
HC17	HC	42.8849	W	NA	NA	NA	NA
HC18	HC	42.0822	W	NA	NA	NA	NA
HC19	HC	43.0027	W	NA	NA	NA	NA
HC2	HC	43.1918	M	NA	NA	NA	NA
HC20	HC	49.8027	W	NA	NA	NA	NA
HC21	HC	53.8575	W	NA	NA	NA	NA
HC22	HC	51.874	W	NA	NA	NA	NA
HC23	HC	54.8	W	NA	NA	NA	NA
HC24	HC	41.9014	W	NA	NA	NA	NA
HC3	HC	52.2767	M	NA	NA	NA	NA
HC4	HC	38.5699	M	NA	NA	NA	NA
HC5	HC	30.3781	M	NA	NA	NA	NA
HC6	HC	33.0658	M	NA	NA	NA	NA
HC7	HC	58.989	M	NA	NA	NA	NA
HC8	HC	32.5534	M	NA	NA	NA	NA
HC9	HC	40.4493	M	NA	NA	NA	NA
S1	S1	44.8329	M	NA	3.45	1.90309	990
S10	S1	28.6521	W	NA	2	1.90309	466
S11	S1	30.6164	M	NA	4.68	1.90309	1088
S12	S1	45.4493	M	NA	2.81	1.69897	1041
S13	S1	49.3945	M	NA	9.16	1.69897	1309
S14	S1	40.0384	M	NA	2.28219	1.69897	375
S15	S1	34.5315	M	NA	2.01096	1.90309	992
S16	S1	41.4192	M	NA	4.56	1.69897	546
S17	S1	32.1041	W	NA	1.21	1.69897	357
S18	S1	37.6575	W	NA	1.89	NA	648
S19	S1	44.3068	W	NA	2.8	1.90309	573
S2	S1	31.1479	M	NA	0.84	1.30103	NA
S20	S1	43.7397	M	NA	1.88767	NA	286
S21	S1	31.0822	M	NA	2.72	1.69897	430
S22	S1	44.9863	M	NA	1.48	1.69897	464
S23	S1	41.2767	W	NA	2.87	1.69897	1163
S24	S1	48.4356	M	NA	7.22	1.69897	1004
S3	S1	39.6384	W	NA	2.92	1.90309	496
S4	S1	44	M	NA	6.17	1.90309	633
S5	S1	37.063	M	NA	1.61	1.90309	865
S6	S1	39.3836	M	NA	2.29	1.69897	403
S7	S1	40.0329	M	NA	3.48	1.39794	528
S8	S1	49.8603	M	NA	2.55	1.90309	546
S9	S1	42.9616	M	NA	1.9	1.69897	668
S1	S2	51.1425	M	NA	9.76	1.69897	906
S10	S2	38.2192	W	NA	7.37	1.39794	766
S11	S2	32.7671	M	NA	6.84	1.69897	1213
S12	S2	55.2767	M	NA	12.64	1.60206	1119
S13	S2	67.8932	M	NA	17.63	NA	NA
S14	S2	54.0247	M	NA	16.29	NA	NA
S15	S2	40.337	M	NA	7.81644	1.69897	1085
S16	S2	51.2356	M	NA	14.39	1.60206	976
S17	S2	43.9616	W	NA	13.04	1.60206	914
S18	S2	48.0685	W	NA	12.22	NA	NA
S19	S2	57.8466	W	NA	16.3	1.60206	898
S2	S2	37.3562	M	NA	7.05	1.69897	1001
S20	S2	54.9534	M	NA	13.1	1.60206	832
S21	S2	42.2493	M	NA	13.89	NA	NA
S22	S2	53.3342	M	NA	9.65	1.60206	581
S23	S2	48.8767	W	NA	10.45	1.60206	1840
S24	S2	58.3863	M	NA	17.13	1.60206	1215
S3	S2	44.5425	W	NA	7.82	1.69897	1130
S4	S2	49.726	M	NA	11.89	1.79934	761
S5	S2	45.5014	M	NA	10.05	1.39794	945
S6	S2	44.2658	M	NA	7.18	1.69897	794
S7	S2	43.6932	M	NA	7.14	1.39794	635
S8	S2	60.2575	M	NA	12.95	1.60206	642
S9	S2	53.0301	M	NA	11.97	1.69897	826

## Sheet: Viability data
Patients	Group	Excluded/Included	%_Lymphocytes_LIVE	%_CD8
EI1	Ei	I	74.85	8.47
EI10	Ei	I	76.2	21.6
EI11	Ei	I	20.85	46.25
EI12	Ei	E	11.22	3.62
EI13	Ei	I	21.95	28.895
EI14	Ei	E	17.95	4.16
EI15	Ei	E	18.75	6.195
EI16	Ei	I	83.9	25.6
EI17	Ei	I	84.35	44.8
EI18	Ei	I	73.75	25.45
EI19	Ei	I	88.25	22.55
EI2	Ei	I	90.5	23.95
EI20	Ei	I	85.6	26.1
EI21	Ei	I	82.15	14.4
EI22	Ei	I	84.1	13
EI23	Ei	I	75.3	45.95
EI24	Ei	I	78.75	31.5
EI3	Ei	I	82.85	17.1
EI4	Ei	I	82.6	17.1
EI5	Ei	I	74.8	21.3
EI6	Ei	I	85.35	23.35
EI7	Ei	I	58.3	17.05
EI8	Ei	I	83.35	18.4
EI9	Ei	I	85.05	16.75
HC1	HC	I	80.1	26.55
HC10	HC	I	92.65	11.5
HC11	HC	I	80.3	7.58
HC12	HC	I	81.65	25.95
HC13	HC	E	21.6	13.65
HC14	HC	I	87.45	16.5
HC15	HC	I	78.6	12.8
HC16	HC	I	75.25	37.4
HC17	HC	I	76.05	11.4
HC18	HC	I	63.05	27.7
HC19	HC	I	65.55	7.77
HC2	HC	I	89.25	14.25
HC20	HC	I	92.6	10.875
HC22	HC	E	14.8	16.1
HC24	HC	I	43.2	22.8
HC3	HC	I	91.5	26.55
HC4	HC	I	92.5	7.705
HC5	HC	I	93.2	10.8
HC6	HC	I	90.8	21.4
HC7	HC	E	12.55	14.7
HC8	HC	I	78.7	10.45
HC9	HC	I	95.7	11.375
S1	S1	I	70	29.3
S10	S1	I	69.55	20.95
S11	S1	E	19.9	15.8
S12	S1	I	89.65	33.3
S13	S1	I	80.25	32.75
S14	S1	E	15	24.05
S15	S1	E	16	25.4
S16	S1	I	66.1	48.85
S17	S1	E	9.72	34.75
S18	S1	E	15.15	36.6
S19	S1	I	38.55	33.95
S2	S1	I	91.05	33.7
S20	S1	I	90.45	51.6
S21	S1	I	52.65	40.3
S22	S1	I	87.1	40.15
S23	S1	I	40.05	14.95
S24	S1	I	57.8	28.65
S3	S1	I	58.6	46.45
S4	S1	E	NA	NA
S5	S1	I	93.35	36.25
S6	S1	I	69.05	29.95
S7	S1	I	88.7	21.35
S8	S1	I	77.75	45.9
S9	S1	I	90	40.4
S1	S2	I	92.3	21.75
S10	S2	I	75.95	16.05
S11	S2	I	86.05	22.5
S12	S2	I	87.05	21.5
S13	S2	I	32.3	28.65
S14	S2	I	73.6	20.7
S15	S2	E	18.85	19.35
S16	S2	I	36.95	48.85
S17	S2	E	10.75	16
S18	S2	E	NA	NA
S19	S2	I	87.95	18.4
S2	S2	I	92.2	34.9
S20	S2	I	91.5	37.55
S21	S2	I	73.3	31.25
S22	S2	I	87.65	36.9
S23	S2	I	89.05	13.9
S24	S2	I	93.5	25.3
S3	S2	I	94.6	51.3
S4	S2	I	79	18.05
S5	S2	I	95.675	31.25
S6	S2	I	90.95	18.35
S7	S2	I	87.85	17.1
S8	S2	I	92.6	33.5
S9	S2	I	89.65	29.2
