# Supplementary material for: Selective loss of CD107a TIGIT+ memory HIV-1-specific CD8+ T cells in PLWH over a decade of ART
Source: eLife. 2023 Sep 19;12:e83737. doi: 10.7554/eLife.83737 (PMC10508883; doi:10.7554/eLife.83737)
Supplement: Figure 1—source data 2. [file elife-83737-fig1-data2.xlsx]

## Sheet: iRs Combos Naive
Patients	Group	O COMBO	1 COMBO	2 COMBO	>3 COMBO
EI1	Ei	91.15	7.495	1.214	0.112
EI10	Ei	94.75	4.4345	0.6555	0.162
EI11	Ei	NA	NA	NA	NA
EI13	Ei	NA	NA	NA	NA
EI16	Ei	92.55	6.2175	1.095	0.132
EI17	Ei	91.9	6.579	1.267	0.2345
EI18	Ei	98.6	1.0555	0.2595	0.0485
EI19	Ei	93.55	5.2455	1.129	0.08241
EI2	Ei	93.75	5.2305	0.78839	0.239465
EI20	Ei	84.35	12.4185	2.819	0.427
EI21	Ei	94.95	3.9335	0.9275	0.192
EI22	Ei	94.95	4.2335	0.654	0.1695
EI23	Ei	92.15	6.529	1.1095	0.2055
EI24	Ei	96.9	2.6595	0.3635	0.0635
EI3	Ei	92.7	5.7415	1.222	0.308
EI4	Ei	97.85	1.531	0.4535	0.163
EI5	Ei	95.05	3.7235	0.8835	0.35
EI6	Ei	91.2	5.537	2.4645	0.808
EI7	Ei	96.8	2.82	0.235	0.15
EI8	Ei	94.75	4.126	0.8285	0.259
EI9	Ei	88.7	9.57	1.395	0.3
HC1	HC	94.8	4.506	0.6435	0.052
HC10	HC	97.9	1.7725	0.24633	0.07599
HC11	HC	96.45	2.8525	0.5485	0.1505
HC12	HC	87.75	7.66	3.2235	1.3655
HC14	HC	96.5	3.001	0.3224	0.139825
HC15	HC	98.3	1.303	0.35238	0.04975
HC16	HC	93.05	5.81	0.9575	0.181
HC17	HC	97.3	2.3165	0.2805	0.0875
HC18	HC	98.65	1.079	0.1927	0.0477
HC19	HC	92.7	6.4895	0.699	0.0815
HC2	HC	94.4	4.734	0.73785	0.1462
HC20	HC	95.05	3.972	0.7915	0.214
HC24	HC	97.1	2.3005	0.5365	0.064
HC3	HC	95.15	4.1265	0.5995	0.0975
HC4	HC	95.85	3.5475	0.4965	0.092
HC5	HC	98.05	1.4995	0.33535	0.11879
HC6	HC	97.65	1.797	0.38404	0.14836
HC7	HC	92.5	5.368	1.828	0.294
HC8	HC	98.05	1.495	0.31	0.1275
HC9	HC	93.95	5.027	0.874	0.117
S1	S1	91.95	6.9925	0.892	0.1685
S10	S1	94.5	3.96	0.98	0.565
S12	S1	93.2	5.998	0.65867	0.12253
S13	S1	91.65	7.5715	0.693	0.0555
S16	S1	90.35	8.99	0.5325	0.195
S19	S1	83.3	14.555	1.78	0.355
S2	S1	97.2	1.9515	0.60671	0.24904
S20	S1	97.45	2.0025	0.4915	0.077
S21	S1	92.2	6.394	1.326	0.085
S22	S1	92.45	6.4295	0.98	0.139
S23	S1	95.3	3.26	0.915	0.545
S24	S1	98.3	1.2885	0.389	0.037
S3	S1	89.7	8.351	1.5995	0.338
S5	S1	96.65	2.7285	0.45931	0.17112
S6	S1	92.55	6.495	0.8395	0.1445
S7	S1	89.9	9.116	0.709	0.2475
S8	S1	91.65	6.9475	1.1175	0.2675
S9	S1	87.2	10.6755	1.938	0.232
S1	S2	91.1	7.515	1.0395	0.37517
S10	S2	94.4	4.857	0.65	0.124
S11	S2	91	7.8085	0.9145	0.2725
S12	S2	93.1	6.1895	0.56196	0.15338
S13	S2	94.1	5.031	0.711	0.167
S14	S2	89.55	9.1695	1.1435	0.1305
S16	S2	92.05	6.33	1.43	0.215
S19	S2	91.95	7.0205	0.904	0.084
S2	S2	98.2	1.358	0.348985	0.112815
S20	S2	98.35	1.4375	0.176845	0.035745
S21	S2	94.6	4.624	0.74886	0.015965
S22	S2	94.95	4.2485	0.747035	0.05564
S23	S2	93.1	5.305	1.2675	0.3345
S24	S2	98.15	1.5155	0.29281	0.049085
S3	S2	93.2	5.425	1.13833	0.275835
S4	S2	97.65	1.9625	0.349	0.022
S5	S2	98.15	1.5245	0.24546	0.06323
S6	S2	88.25	10.2175	1.33714	0.192015
S7	S2	86.6	11.5115	1.5735	0.2945
S8	S2	95	3.97	0.816275	0.19686
S9	S2	76.95	18.005	4.1865	0.7825

## Sheet: iRs Combos CM
Patients	Group	O COMBO	1 COMBO	2 COMBO	>3 COMBO
EI1	Ei	51.2	38.775	9.1005	0.9105
EI10	Ei	46.6	29.105	17.03	7.29
EI11	Ei	NA	NA	NA	NA
EI13	Ei	NA	NA	NA	NA
EI16	Ei	49.05	40.173	9.435	1.307
EI17	Ei	56.65	31.975	9.97	1.376
EI18	Ei	64.2	20.295	13.985	1.545
EI19	Ei	56.6	30.655	12.2762	0.47001
EI2	Ei	31.55	42.614	18.459	7.352
EI20	Ei	49.5	29.7425	17.5435	3.2035
EI21	Ei	32.9	37.1	24.421	5.631
EI22	Ei	34.3	40.295	20.95	4.455
EI23	Ei	46.05	37.845	13.43	2.62
EI24	Ei	65.8	24.67	8.86	0.68
EI3	Ei	32.2	34.174	25.2695	8.3175
EI4	Ei	68.05	23.5	7.25	1.2085
EI5	Ei	61.3	20.717	13.927	4.053
EI6	Ei	46.75	23.524	20.954	8.817
EI7	Ei	59.8	33.25	5.601	1.33
EI8	Ei	49.4	31.045	14.465	5.115
EI9	Ei	54.85	30.6	10.47	4.08
HC1	HC	57.1	33.0295	9.3385	0.5465
HC10	HC	66.85	28.441	4.219	0.4345
HC11	HC	57.35	26.945	11.825	3.845
HC12	HC	61.25	28.025	9.069	1.718
HC14	HC	36.8	32.39	21.032	9.7945
HC15	HC	61.35	22.5555	15.7285	0.3215
HC16	HC	49.6	26.9725	21.3635	2.0445
HC17	HC	53.45	35.555	10.55	0.451
HC18	HC	59.85	31.661	8.005	0.523
HC19	HC	47.75	35.435	16.093	0.693
HC2	HC	56.2	30.125	12.9265	0.7685
HC20	HC	47.6	31.265	17.841	3.2705
HC24	HC	62.9	24.665	11.7325	0.689
HC3	HC	59.45	31	8.7235	0.813
HC4	HC	83.75	12.1895	3.8495	0.2
HC5	HC	65.65	23.531	9.302	1.555
HC6	HC	73.45	19.094	6.432	1.0205
HC7	HC	50.1	32.96	15.386	1.669
HC8	HC	53.55	27.819	17.478	1.148
HC9	HC	53.6	33.744	11.785	0.8415
S1	S1	43.05	38.755	16.185	2.0075
S10	S1	44.35	32.475	18.02	5.13
S12	S1	57.8	35.7095	5.6235	0.8465
S13	S1	41.8	42.385	15.4665	0.2615
S16	S1	52.65	31.875	13.4495	2.0515
S19	S1	45.05	31.01	19.975	3.945
S2	S1	48.65	29.83	18.289	3.217
S20	S1	40.75	42.46	15.4895	1.2945
S21	S1	42.15	31.72	26.165	0
S22	S1	39.75	42.235	17.5755	0.4815
S23	S1	58.75	24.35	14.875	2
S24	S1	65.35	27.225	6.715	0.7
S3	S1	32.85	40.33	21.636	5.125
S5	S1	59	29.345	9.985	1.745
S6	S1	38.85	34.315	20.465	6.365
S7	S1	40.1	39.28	17.7805	2.8105
S8	S1	39.25	33.2955	21.3065	6.1275
S9	S1	62.85	24.64	11.6089	0.91868
S1	S2	37.55	44.26	15.9955	2.1895
S10	S2	45.45	32.765	17.42	4.385
S11	S2	39.35	45.63	13.5155	1.5365
S12	S2	62.15	30.777	5.108	1.9515
S13	S2	52.55	33.06	14.355	0.089
S14	S2	49.65	37.5315	11.948	0.873
S16	S2	69	23.993	6.545	0.473
S19	S2	57.25	34.4745	8.032	0.24
S2	S2	49.95	29.455	18.4845	2.099
S20	S2	43.4	38.986	16.7751	0.836565
S21	S2	41.5	34.0965	23.883	0.464
S22	S2	38	42.66	18.7365	0.614
S23	S2	49.4	34.505	13.93	2.165
S24	S2	66.45	26.713	6.2545	0.5905
S3	S2	35.15	42.5375	18.9215	3.456
S4	S2	42.95	35.645	19.932	1.489
S5	S2	73.3	19.535	6.6165	0.5765
S6	S2	38.1	43.0595	17.87	1.0205
S7	S2	30.6	39.791	26.1695	3.352
S8	S2	42.75	35.924	19.0105	2.3585
S9	S2	61	24.4495	13.331	1.15318

## Sheet: iRs Combos TM
PatIents	Group	O COMBO	1 COMBO	2 COMBO	>3 COMBO
EI1	Ei	27.45	43.3465	28.548	0.7025
EI10	Ei	15.7	16.832	37.951	29.5205
EI11	Ei	NA	NA	NA	NA
EI13	Ei	NA	NA	NA	NA
EI16	Ei	21.8	49.1845	26.7465	2.2225
EI17	Ei	21.6	40.995	35.489	1.948
EI18	Ei	6.645	22.486	67.616	3.24
EI19	Ei	26	34.295	38.1275	1.5635
EI2	Ei	10.35	32.9885	41.6455	15.012
EI20	Ei	14.65	32.406	45.848	7.0805
EI21	Ei	9.705	41.45	43.1835	5.6935
EI22	Ei	12.95	34.855	43.31	8.809
EI23	Ei	18.4	38.552	41.3675	1.64143
EI24	Ei	15.55	26.4705	55.8475	2.082
EI3	Ei	8.69	32.813	52.341	6.17107
EI4	Ei	23.95	32.9105	38.8905	4.2225
EI5	Ei	23.35	28.6005	40.4225	7.631
EI6	Ei	17.45	22.0299	43.7765	16.7215
EI7	Ei	31.9	47.395	18.922	1.826
EI8	Ei	15.5	27.938	38.254	18.3
EI9	Ei	6.77	15.4675	47.519	30.2995
HC1	HC	31	36.7395	31.9215	0.4
HC10	HC	34	39.548	25.002	1.418
HC11	HC	58.25	28.955	11.725	1.084
HC12	HC	55.05	35.336	8.5785	1.03809
HC14	HC	35.15	44.335	19.0569	1.43964
HC15	HC	22.85	33.237	43.4175	0.4325
HC16	HC	36.15	31.635	29.1538	3.07023
HC17	HC	33.2	44.32	20.78	1.67
HC18	HC	34.05	37.918	27.2691	0.752085
HC19	HC	39.6	35.025	24.338	1.0835
HC2	HC	23.3	33.9545	41.166	1.576
HC20	HC	15.65	30.9915	51.5505	1.9075
HC24	HC	44	29.989	24.851	1.138
HC3	HC	21.05	46.173	29.8305	2.919
HC4	HC	29.3	40.195	29.9415	0.565
HC5	HC	33.75	32.335	32.7115	1.271
HC6	HC	32.1	21.304	43.13	3.4805
HC7	HC	19.7	29.814	45.36	5.109
HC8	HC	21.2	29.902	47.7285	1.1925
HC9	HC	36.35	37.415	25.3535	0.8865
S1	S1	25.6	32.2965	37.4955	4.5875
S10	S1	14	39.55	44.53	1.885
S12	S1	39.5	40.204	18.7735	1.5475
S13	S1	23.9	29.445	45.8535	0.84
S16	S1	32.15	30.7575	31.8595	5.271
S19	S1	20.5	37.14	37.15	5.225
S2	S1	31.85	29.68	36.1125	2.398
S20	S1	22.35	43.501	31.545	2.59
S21	S1	27.85	29.775	40.225	2.16
S22	S1	13.1	33.1715	52.995	0.716
S23	S1	14.41	35.3	45.87	4.41
S24	S1	20.95	29.521	48.776	0.808
S3	S1	13.55	34.43	43.1105	8.861
S5	S1	10.09	24.306	57.7415	7.871
S6	S1	9.055	29.7495	46.3415	14.7935
S7	S1	28.1	40.4545	26.921	4.561
S8	S1	12.6	29.89	43.7065	13.78
S9	S1	30.85	27.9035	37.0855	4.1775
S1	S2	17.2	36.248	42.2995	4.2705
S10	S2	22.3	39.54	34.035	4.115
S11	S2	30.05	41.485	23.8485	4.6515
S12	S2	50.15	37.0465	12.378	0.3915
S13	S2	41.8	29.3545	28.7445	0.089
S14	S2	22.6	50.825	25.524	1.055
S16	S2	55.1	25.108	17.812	1.936
S19	S2	25.6	44.75	29.2	0.3655
S2	S2	35	26.1875	37.4765	1.285
S20	S2	22.65	35.1515	40.6402	1.5721
S21	S2	35.15	31.291	32.287	1.2155
S22	S2	16.2	38.0296	45.3581	0.48178
S23	S2	34.1	34.609	29.541	1.779
S24	S2	26.7	30.605	42.0535	0.641
S3	S2	12.5	42.875	36.454	8.1025
S4	S2	18.8	50.435	29.2435	1.498
S5	S2	31.85	26.02	39.675	2.5
S6	S2	20.05	33.4315	44.616	1.861
S7	S2	19.2	39.6945	35.1185	5.982
S8	S2	12.45	36.557	45.502	5.5015
S9	S2	35.45	28.709	32.5528	3.26515

## Sheet: iRs Combos EM
PatIents	Group	O COMBO	1 COMBO	2 COMBO	>3 COMBO
Ei1	Ei	22.95	63.958	12.624	0.433
Ei10	Ei	14.9	46.5175	32.073	6.544
EI11	Ei	NA	NA	NA	NA
EI13	Ei	NA	NA	NA	NA
Ei16	Ei	52.7	40.1135	6.80241	0.37341
Ei17	Ei	32.9	53.429	13.1025	0.59
Ei18	Ei	28.45	37.39	32.436	1.768
Ei19	Ei	56.4	38.809	4.5425	0.2655
Ei2	Ei	13.3	57.605	24.441	4.7215
Ei20	Ei	31.05	53.577	13.212	2.126
Ei21	Ei	44.3	39.7665	13.773	2.1425
Ei22	Ei	33.1	52.968	12.6123	1.26879
Ei23	Ei	57.75	36.3964	5.77616	0.04709
Ei25	Ei	47	40.1635	12.2821	0.56985
Ei3	Ei	24.5	43.995	29.1055	2.48
Ei4	Ei	16.35	61.827	21.392	0.383
Ei5	Ei	50.65	31.3095	15.7065	2.363
Ei6	Ei	22.35	39.482	30.471	7.722
Ei7	Ei	41	48.86	9.168	0.9465
Ei8	Ei	67.25	24.9045	6.44	1.402
Ei9	Ei	27.7	34.575	27.397	10.3595
HC1	HC	32.35	55.4225	12.073	0.15442
HC10	HC	16.25	72.4275	10.993	0.388
HC11	HC	60.8	32.845	5.615	0.755
HC12	HC	57.75	33.741	7.523	0.9535
HC14	HC	23	63.709	12.993	0.2645
HC15	HC	25.4	53.344	21.168	0.0785
HC16	HC	68.1	24.9	5.99604	1.02944
HC17	HC	15.4	65.98	17.5905	1.0455
HC18	HC	38.4	55.9465	5.4985	0.163
HC19	HC	64.3	32.095	3.395	0.165
HC2	HC	14.05	60.406	24.386	1.156
HC20	HC	5.08	49.61	44.115	1.194
HC24	HC	39.85	45.275	13.96	0.99
HC3	HC	36.05	46.294	16.3625	1.354
HC4	HC	40.2	54.8475	4.76	0.219
HC5	HC	20.8	54.23	24.634	0.377
HC6	HC	37.9	35.685	25.1465	1.2935
HC7	HC	17.5	60.185	19.5077	2.84574
HC8	HC	19	64.585	15.93	0.515
HC9	HC	41.75	48.3215	9.4015	0.513
S1	S1	34.85	42.8895	19.1065	3.1345
S10	S1	59.95	27.765	11.5515	0.675
S12	S1	38.4	42.002	17.3666	2.23662
S13	S1	35.55	49.062	15.0305	0.3735
S16	S1	41.35	34.618	19.4045	4.6705
S19	S1	41.35	41.725	15.66	1.275
S2	S1	29.55	40.7455	27.395	2.2645
S20	S1	39.6	47.363	12.186	0.897
S21	S1	41.85	37.255	20.5165	0.3815
S22	S1	32.7	48.9895	18.1016	0.22063
S23	S1	42.4	39.145	17.32	1.175
S24	S1	43.4	45.666	10.664	0.227
S3	S1	38.5	40.0745	18.5365	2.914
S5	S1	17.25	50.408	29.436	2.808
S6	S1	33.55	36.5435	23.8815	5.9955
S7	S1	27.9	53.03	17.0085	2.046
S8	S1	14.75	42.8385	38.335	4.03033
S9	S1	30.85	49.5885	17.9955	1.599
S1	S2	29.15	48.845	19.628	2.339
S10	S2	47.15	29.559	20.9175	2.39
S11	S2	27.25	49.665	20.57	2.52
S12	S2	35.95	54.433	9.25144	0.30287
S13	S2	53.1	39.159	7.7365	0.054
S14	S2	25.5	66.415	7.7325	0.2925
S16	S2	40.2	37.9525	17.7985	4.07
S19	S2	16.4	70.9295	12.325	0.2985
S2	S2	31.5	41.053	25.79	1.678
S20	S2	31.6	55.823	12.3405	0.31602
S21	S2	68.8	21.9725	8.80751	0.44801
S22	S2	23.8	55.4254	20.5873	0.177
S23	S2	26.15	64.408	8.835	0.578
S24	S2	49.05	45.506	5.3647	0.0885
S3	S2	32.95	41.4225	22.9236	2.6743
S4	S2	47.6	46.189	5.891	0.301
S5	S2	25.05	57.195	16.952	0.839
S6	S2	36.55	43.181	19.226	1.008
S7	S2	29.95	54.519	13.6284	1.88378
S8	S2	16.25	59.084	23.0401	1.57607
S9	S2	29.5	52.1395	16.831	1.514

## Sheet: iRs Combos Eff
PatIents	Group	O COMBO	1 COMBO	2 COMBO	>3 COMBO
Ei1	Ei	6.715	77.075	14.945	1.2815
Ei10	Ei	2.685	43.475	46.635	7.17
EI11	Ei	NA	NA	NA	NA
EI13	Ei	NA	NA	NA	NA
Ei16	Ei	42.45	51.636	5.624	0.3275
Ei17	Ei	25.2	64.557	9.6855	0.59
Ei18	Ei	13.25	63.745	20.9225	2.05
Ei19	Ei	29.2	68.3555	2.455	0.0395
Ei2	Ei	7.455	65.7805	23.808	2.9505
Ei20	Ei	20.55	67.879	10.651	0.918
Ei21	Ei	34.65	54.0275	8.825	2.5095
Ei22	Ei	27.65	58.534	11.68	2.157
Ei23	Ei	13.55	80.618	5.749	0.089
Ei25	Ei	49.05	41.648	8.258	1.0465
Ei3	Ei	14.5	61.807	21.742	1.961
Ei4	Ei	4.61	87.4755	7.6505	0.246
Ei5	Ei	48	34.7805	14.836	2.4055
Ei6	Ei	4.16	58.44	33.1115	4.2975
Ei7	Ei	16.6	76.98	5.24	1.165
Ei8	Ei	10.19	47.0395	40.1645	2.6095
Ei9	Ei	8.06	46.655	38.017	7.259
HC1	HC	14.8	72.699	12.427	0.089
HC10	HC	0.245	96.0935	3.606	0.0455
HC11	HC	27.75	53.93	15.74	2.6
HC12	HC	40.95	42.363	14.54	2.167
HC14	HC	7.885	70.35	21.66	0.12
HC15	HC	14.75	68.7	16.39	0.16
HC16	HC	63	30.1555	6.04012	0.82475
HC17	HC	9.29	80.605	9.535	0.545
HC18	HC	14.5	81.1375	4.2025	0.1215
HC19	HC	20.55	74.195	5.245	0
HC2	HC	6.635	80.2135	12.524	0.603
HC20	HC	0.465	89.169	9.975	0.399
HC24	HC	22.75	70.375	6.89	0
HC3	HC	25.25	49.256	23.027	2.405
HC4	HC	44.2	51.5255	3.875	0.396
HC5	HC	13.4	67.6	18.88	0.075
HC6	HC	33.6	42.565	22.2745	1.513
HC7	HC	16.8	73.777	8.59493	0.75
HC8	HC	0.525	81.545	17.655	0.3
HC9	HC	10.5	37.905	49.6	2.05
S1	S1	16.9	63.295	17.54	2.25
S10	S1	23.65	62.981	12.553	0.768
S12	S1	22.75	61.3575	14.356	1.5175
S13	S1	21.05	61.7025	15.8575	1.358
S16	S1	22.4	47.26	27.855	2.44
S19	S1	30.7	54.94	12.47	1.84
S2	S1	19.8	59.0455	19.9225	1.245
S20	S1	26.15	65.975	7.525	0.33
S21	S1	48.4	47.1105	4.3205	0.144
S22	S1	6.71	82.3923	10.6193	0.22659
S23	S1	18.25	66.87	14.19	0.64
S24	S1	8.875	86.0675	4.96	0.135
S3	S1	31.25	35.0555	30.0468	3.71399
S5	S1	8.61	62.2	24.56	4.6
S6	S1	19.95	42.8275	29.9395	7.337
S7	S1	10.515	61.265	24.72	3.565
S8	S1	15.35	43.1885	37.2215	4.23531
S9	S1	19.7	60.882	17.663	1.754
S1	S2	31.9	42.876	21.459	3.6935
S10	S2	8.07	82.4085	8.6015	0.919
S11	S2	6.915	61.09	30.845	1.105
S12	S2	17.55	77.1595	5.216	0.084
S13	S2	46.85	43.36	9.8	0
S14	S2	4.545	91.3585	3.8565	0.257
S16	S2	16.7	57.41	25.93	0
S19	S2	4.14	88.009	7.559	0.264
S2	S2	29.7	49.58	19.765	0.965
S20	S2	51.3	46.744	1.903	0.044
S21	S2	59.3	33.9645	5.9125	0.845
S22	S2	4.925	84.8196	10.0955	0.15029
S23	S2	10.065	82.359	7.195	0.39
S24	S2	30.15	64.7405	4.911	0.2095
S3	S2	13.3	29.8208	52.9995	3.88255
S4	S2	32.95	61.2165	5.4545	0.3545
S5	S2	14.7	71.756	12.765	0.771
S6	S2	22.85	62.5215	13.19	1.451
S7	S2	13.52	63.9845	19.5515	2.93
S8	S2	8.52	47.0552	41.0976	3.37607
S9	S2	14.65	65.653	17.6865	1.9705
