# Supplementary material for: Selective loss of CD107a TIGIT+ memory HIV-1-specific CD8+ T cells in PLWH over a decade of ART
Source: eLife. 2023 Sep 19;12:e83737. doi: 10.7554/eLife.83737 (PMC10508883; doi:10.7554/eLife.83737)
Supplement: Figure 1—source data 3. [file elife-83737-fig1-data3.xlsx]

## Sheet: Significant iRs combinations
		CM single TIGIT+	EM TIGIT+TIM-3+	EFF TIGIT+TIM-3+
Patients	Group	CM_CD39-LAG3-PD1-TIGIT+TIM3-	EM_CD39-LAG3-PD1-TIGIT+TIM3+	Effector_CD39-LAG3-PD1-TIGIT+TIM3+
EI1	Ei	37.25	2.08	7.86
EI10	Ei	17.2	0.065	0
EI11	Ei	NA	NA	NA
EI13	Ei	NA	NA	NA
EI16	Ei	38.2	0.085	0.1035
EI17	Ei	29.6	0.18	0.855
EI18	Ei	17.25	0.51	1.605
EI19	Ei	27.15	0.22	0.285
EI2	Ei	40.3	0.34	0.8
EI20	Ei	28.55	0.335	0.88
EI21	Ei	33.85	0.555	1.52
EI22	Ei	38.4	0.73	2.045
EI23	Ei	35.8	0.049	0.17
EI25	Ei	23.15	0.46	0.57
EI3	Ei	31.3	0.185	0.235
EI4	Ei	20.9	0.032	0.13
EI5	Ei	13.9	0.1145	0.1055
EI6	Ei	21	0.15	0.275
EI7	Ei	30.2	0.5	1.1
EI8	Ei	23.65	0	0.189
EI9	Ei	17.9	0.14	0.05
HC1	HC	31.7	0.1285	0.27
HC10	HC	27.55	0.325	0.0815
HC11	HC	14.95	0	0
HC12	HC	24.05	0.145	0.335
HC14	HC	31.15	0.0305	0.74
HC15	HC	17.05	0.0225	0
HC16	HC	19.25	0.99	1.13
HC17	HC	30.65	0.0655	0
HC18	HC	29.8	0.0335	0.075
HC19	HC	32.8	0.055	0
HC2	HC	27.85	0.17	0.0915
HC20	HC	28.85	0	0.045
HC24	HC	19.75	0	0
HC3	HC	27.15	0.11	0.23
HC4	HC	11.3	0.325	0.39
HC5	HC	18.45	0	0
HC6	HC	14.8	0.0195	0.0165
HC7	HC	27.7	0.07	0.11
HC8	HC	24.3	0.09	0
HC9	HC	30.75	0.0355	0.12
S1	S1	35.7	1.455	2.07
S10	S1	30.1	0.024	0.041
S12	S1	32.3	0.765	0.97
S13	S1	39.9	0.058	0.1025
S16	S1	17.65	0.083	0
S19	S1	27.8	0.2	0.685
S2	S1	25.8	0.245	1.18
S20	S1	40.9	0.064	0.225
S21	S1	27.55	0.0365	0.43
S22	S1	39.8	0.0745	0.175
S23	S1	18.35	0	0
S24	S1	25.5	1.02	1.49
S3	S1	36.45	0.275	0.175
S5	S1	24.2	1.015	2.535
S6	S1	31.25	0.15	0.49
S7	S1	32.85	0.93	0.995
S8	S1	27.05	0.1005	0.375
S9	S1	20.95	0.53	0.52
S1	S2	42	1.21	0.71
S10	S2	28.7	0.1245	0.205
S11	S2	39.15	0.065	0.255
S12	S2	28.05	0.1335	0.105
S13	S2	28.45	0	0.175
S14	S2	34.25	1.475	0.915
S16	S2	15.85	0.0395	0
S19	S2	33.3	0.23	0.585
S2	S2	24.15	0.063	0.105
S20	S2	36.2	0.084	0.052
S21	S2	30.5	0.205	2.22
S22	S2	40.05	0.0345	0.0985
S23	S2	28.5	0.065	0.39
S24	S2	25.55	0.1095	0.245
S3	S2	39.35	0.16	0.185
S4	S2	32.3	0	0.043
S5	S2	17.85	0.78	1.88
S6	S2	41.8	0.4	2.195
S7	S2	33.25	0.6	0.765
S8	S2	32.55	0.1035	0.305
S9	S2	17.95	0.23	0.24

## Sheet: Other iRs combinations
		CM																															TM
Patients	Group	CM_CD39+LAG3+PD1+TIGIT+TIM3+	CM_CD39+LAG3+PD1+TIGIT+TIM3-	CM_CD39+LAG3+PD1+TIGIT-TIM3+	CM_CD39+LAG3+PD1+TIGIT-TIM3-	CM_CD39+LAG3+PD1-TIGIT+TIM3+	CM_CD39+LAG3+PD1-TIGIT+TIM3-	CM_CD39+LAG3+PD1-TIGIT-TIM3+	CM_CD39+LAG3+PD1-TIGIT-TIM3-	CM_CD39+LAG3-PD1+TIGIT+TIM3+	CM_CD39+LAG3-PD1+TIGIT+TIM3-	CM_CD39+LAG3-PD1+TIGIT-TIM3+	CM_CD39+LAG3-PD1+TIGIT-TIM3-	CM_CD39+LAG3-PD1-TIGIT+TIM3+	CM_CD39+LAG3-PD1-TIGIT+TIM3-	CM_CD39+LAG3-PD1-TIGIT-TIM3+	CM_CD39+LAG3-PD1-TIGIT-TIM3-	CM_CD39-LAG3+PD1+TIGIT+TIM3+	CM_CD39-LAG3+PD1+TIGIT+TIM3-	CM_CD39-LAG3+PD1+TIGIT-TIM3+	CM_CD39-LAG3+PD1+TIGIT-TIM3-	CM_CD39-LAG3+PD1-TIGIT+TIM3+	CM_CD39-LAG3+PD1-TIGIT+TIM3-	CM_CD39-LAG3+PD1-TIGIT-TIM3+	CM_CD39-LAG3+PD1-TIGIT-TIM3-	CM_CD39-LAG3-PD1+TIGIT+TIM3+	CM_CD39-LAG3-PD1+TIGIT+TIM3-	CM_CD39-LAG3-PD1+TIGIT-TIM3+	CM_CD39-LAG3-PD1+TIGIT-TIM3-	CM_CD39-LAG3-PD1-TIGIT+TIM3+	CM_CD39-LAG3-PD1-TIGIT-TIM3+	CM_CD39-LAG3-PD1-TIGIT-TIM3-	TM_CD39+LAG3+PD1+TIGIT+TIM3+	TM_CD39+LAG3+PD1+TIGIT+TIM3-	TM_CD39+LAG3+PD1+TIGIT-TIM3+	TM_CD39+LAG3+PD1+TIGIT-TIM3-	TM_CD39+LAG3+PD1-TIGIT+TIM3+	TM_CD39+LAG3+PD1-TIGIT+TIM3-	TM_CD39+LAG3+PD1-TIGIT-TIM3+	TM_CD39+LAG3+PD1-TIGIT-TIM3-	TM_CD39+LAG3-PD1+TIGIT+TIM3+	TM_CD39+LAG3-PD1+TIGIT+TIM3-	TM_CD39+LAG3-PD1+TIGIT-TIM3+	TM_CD39+LAG3-PD1+TIGIT-TIM3-	TM_CD39+LAG3-PD1-TIGIT+TIM3+	TM_CD39+LAG3-PD1-TIGIT+TIM3-	TM_CD39+LAG3-PD1-TIGIT-TIM3+	TM_CD39+LAG3-PD1-TIGIT-TIM3-	TM_CD39-LAG3+PD1+TIGIT+TIM3+
EI1	Ei	0.0405	0	0.1055	0	0	0.1055	0.066	0.17	0	0.2955	0.0255	0	0.0905	0.7	0.17	0.4	0	0.066	0	0	0.0405	0.245	0.0405	0.22	0.075	6.915	0	0.39	0.86	0.515	51.2	0	0	0	0	0	0	0	0	0.047	0.0735	0	0	0	0.081	0	0.081	0
EI10	Ei	0.09	0.73	0	0	0	0.275	0	0.095	0	0.28	0	0	0.095	0.095	0	0.265	0	5.455	0	0.19	0.275	6.95	0.09	9.595	0.09	8.965	0.19	1.495	0.455	0.55	46.6	0.038	0.745	0	0.075	0	0.1115	0	0.019	0	0.15	0	0.0375	0	0.11	0	0.094	0.0935
EI11	Ei	NA	NA	NA	NA	NA	NA	NA	NA	NA	NA	NA	NA	NA	NA	NA	NA	NA	NA	NA	NA	NA	NA	NA	NA	NA	NA	NA	NA	NA	NA	NA	NA	NA	NA	NA	NA	NA	NA	NA	NA	NA	NA	NA	NA	NA	NA	NA	NA
EI13	Ei	NA	NA	NA	NA	NA	NA	NA	NA	NA	NA	NA	NA	NA	NA	NA	NA	NA	NA	NA	NA	NA	NA	NA	NA	NA	NA	NA	NA	NA	NA	NA	NA	NA	NA	NA	NA	NA	NA	NA	NA	NA	NA	NA	NA	NA	NA	NA	NA
EI16	Ei	0	0.135	0	0.0075	0	0.175	0	0.019	0	0.25	0	0	0	0.295	0.0115	0.023	0	0.655	0	0	0.0155	1.355	0.0115	0.865	0.069	7.495	0.023	0.915	0.225	0.17	49.05	0	0.1165	0	0.005	0	0.0855	0	0.005	0	0.23	0	0.013	0	0.365	0	0.013	0.005
EI17	Ei	0.024	0.1515	0	0.024	0	0.215	0	0.024	0	0.28	0	0	0	0.77	0	0	0	0.65	0	0.089	0	1.07	0	0.84	0.0315	7.93	0.0315	1.15	0.0555	0.385	56.65	0	0.18	0	0	0	0.0945	0	0.0165	0	0.425	0	0	0.0065	0.605	0	0.026	0.01
EI18	Ei	0	0	0	0	0	0	0	0	0	0.33	0	0	0.11	0.29	0	0.13	0.11	0.305	0	0.11	0.065	0.305	0	0.4	0.625	12.75	0.13	2.145	0.4	0.37	64.2	0.014	0	0	0.014	0.014	0.0395	0	0	0	0.38	0	0.064	0	0.0395	0	0	0.0535
EI19	Ei	0	0	0	0.00467	0	0.00467	0	0	0	0.014	0	0.00467	0	0.0095	0	0	0.01417	0.09	0	0.019	0.0925	0.0975	0.057	0.11	0.25	9.885	0.0235	1.54	2.18	1.855	56.6	0	0	0	0	0	0.0115	0.0115	0	0.0115	0.0115	0	0	0	0.0055	0	0.0115	0.046
EI2	Ei	0.045	1.165	0	0	0.0115	0.425	0	0	0.0225	2.49	0	0	0.0225	1.555	0	0.139	0.049	2.825	0.0115	0.1275	0.125	3.645	0	1.175	0.16	12.65	0.0115	0.79	0.47	0.21	31.55	0.36	2.205	0.0405	0.0435	0.0405	0.81	0	0.1125	0.165	2.785	0	0.0495	0.009	1.37	0.031	0.26	0.175
EI20	Ei	0.066	0.285	0	0.0225	0	0.1095	0.044	0.088	0.0215	0.92	0	0.044	0.044	0.395	0	0.0875	0.0215	1.56	0	0	0.0215	1.03	0	0.575	0.088	15.7	0.0215	0.465	0.265	0.065	49.5	0.045	0.475	0	0.011	0.011	0.113	0.011	0.011	0.08	2.005	0	0.091	0.011	0.385	0	0.069	0.0235
EI21	Ei	0.0455	0.555	0	0	0	0.38	0	0.0455	0	3.12	0	0.05	0.15	2.105	0	0.185	0.05	0.995	0	0	0.09	1.045	0.05	0.72	0.2455	20.6	0.0455	2.065	0.48	0.28	32.9	0.06	0.59	0.0175	0	0.0345	0.2	0	0.0085	0.114	2.38	0	0.14	0.043	1.325	0.0085	0.15	0.052
EI22	Ei	0.05	0.375	0	0	0.125	0.375	0	0.18	0.05	1.19	0	0.075	0.25	0.51	0	0.18	0.195	1.49	0	0	0.23	3.02	0.125	0.74	0.125	14.8	0.105	0.445	2.135	0.53	34.3	0.259	0.465	0	0.023	0.083	0.161	0	0.052	0.26	1.64	0.029	0.083	0.099	0.995	0	0.245	0.205
EI23	Ei	0	0.155	0	0	0	0	0	0.05	0	2.21	0.05	0	0	1.365	0	0.52	0	0.105	0	0.21	0	0.205	0	0.255	0.1	11.5	0	1.115	0.1	0.155	46.05	0.002965	0.012965	0	0	0	0	0	0.002965	0.0265	1.25	0.005	0.0485	0.016	0.39	0	0.036	0
EI25	Ei	0	0.19	0	0	0	0	0.05	0	0	0.17	0	0	0	0.4	0	0.05	0	0.22	0	0	0	0.23	0	0.51	0.05	7.885	0.125	0.645	0.22	0.315	65.8	0	0.0875	0	0	0	0.0265	0	0.009	0.018	0.48	0	0.018	0.027	0.235	0	0.0265	0.018
EI3	Ei	0.114	1.435	0.0575	0.0195	0.0945	0.73	0	0.0195	0.08	3.01	0	0.118	0.245	1.4	0.0575	0.304	0.0575	2.19	0	0.115	0.0195	1.75	0	0.615	0.265	20.85	0.0945	1.475	0.865	0.48	32.2	0.0635	0.33	0	0.011785	0.027	0.185	0	0.0075	0.145	1.64	0	0.0435	0.0745	1.165	0.0075	0.111	0.0355
EI4	Ei	0	0.14	0	0.095	0	0.088	0.0165	0.14	0	0.64	0	0	0	0.52	0	0.18	0	0.175	0	0.0375	0	0.27	0	0.595	0.054	6.195	0.019	1.61	0.0685	0.215	68.05	0.108	0.465	0	0	0.0285	0.1	0	0.0115	0.075	1.69	0	0.0705	0	0.55	0	0.1015	0.0445
EI5	Ei	0	0.755	0.055	0	0.041	0.185	0	0.146	0	0.256	0	0	0	0.405	0	0.096	0	2.61	0	0.66	0.055	1.925	0.041	3.88	0.096	10.75	0	2.695	0	0.146	61.3	0.049	0.235	0	0	0.019	0.12	0	0.0545	0	0.335	0	0.019	0	0.0705	0	0.019	0.065
EI6	Ei	0.027	0.45	0.052	0.0125	0	0.092	0	0.117	0.027	0.115	0	0	0.055	0	0	0.037	0.025	7.83	0	0.29	0.0675	4.53	0.08	1.37	0.064	15.65	0.027	0.92	0.26	0.197	46.75	0	0.018	0	0	0	0	0	0.012535	0	0.007985	0	0	0	0.00445	0	0.007985	0.0675
EI7	Ei	0	0.26	0	0	0	0.305	0	0.046	0.09	0.425	0	0	0.038	1.15	0	0.48	0	0.128	0	0.084	0.084	1.35	0.038	1.545	0	2.565	0.038	0.72	0.33	0.305	59.8	0.044	0.06	0	0.044	0.044	0.21	0	0.044	0	0.395	0	0.13	0.044	1.515	0.044	0.395	0
EI8	Ei	0	0.78	0.15	0	0	0.835	0	0.27	0	1.285	0	0.06	0.12	1.975	0	0.33	0	1.705	0	0.36	0.18	4.615	0	5.985	0.06	6.975	0	0.9	0.21	0.18	49.4	0	2.82	0	0.039	0.099	0.53	0.039	0.08	0	1.745	0	0.14	0	0.49	0	0.039	0.039
EI9	Ei	0	0.61	0	0	0	0.305	0	0	0	0	0	0	0	0.12	0	0	0	3.165	0	0	0	8.155	0	12.7	0	2.195	0	0	0	0	54.85	0.0325	0.28	0	0	0	0.057	0	0	0	0	0	0	0.0325	0.0495	0	0.0325	0.065
HC1	HC	0.021	0.0455	0.11	0	0.0335	0.0335	0.0125	0.0125	0.021	0.0125	0	0	0	0.0415	0	0.0245	0.0125	0.145	0	0.0335	0.0335	0.285	0	0.21	0.066	8.205	0.021	0.765	0.74	0.33	57.1	0	0.011	0	0.011	0	0	0	0	0	0.0095	0	0	0	0.022	0	0	0
HC10	HC	0	0.014	0	0.024	0.01	0	0	0	0	0.255	0	0	0	0.275	0.02	0.091	0	0.0975	0	0	0.01	0.17	0	0.17	0.024	3.275	0.024	0.445	0.455	0.185	66.85	0	0.0135	0	0	0	0.0365	0	0	0	0.3	0	0.101	0.0135	0.275	0	0.103	0.0095
HC11	HC	0	0.14	0.39	0	0	0.14	2.025	1.18	0	0.535	0	0.335	0	0.87	1.235	2.36	0	0.615	0	0.11	0	1.01	0	2.7	0	7.085	0	6.685	0	0.25	57.35	0	0	0	0	0	0.0495	0	0.065	0.0495	0.165	0	0.165	0	0	0	0.23	0
HC12	HC	0.014	0.235	0	0.0625	0	0.091	0	0.075	0.014	0.54	0	0.0625	0.03	1.075	0	0.27	0	0.6	0.014	0.25	0	0.515	0	1.34	0.1175	7.015	0.016	2.215	0.0605	0.15	61.25	0.0055	0.061	0	0	0	0.00953	0	0.0055	0	0.19	0	0.034	0	0.115	0	0.0745	0.00953
HC14	HC	0.016	0.215	0	0.0195	0	0.0355	0	0.016	0	9.37	0	0.052	0	1.695	0.0355	0.125	0	0.0995	0	0.016	0	0.0715	0	0	0.039	19.05	0.016	0.925	0.08	0.19	36.8	0	0.004935	0	0	0	0.00247	0.002835	0.00247	0.013	1.31	0	0.013	0.016435	0.24	0.00247	0.0565	0
HC15	HC	0.05	0	0	0.0205	0	0	0.0675	0.026	0	0	0	0.026	0	0	0.111	0.0705	0.0205	0.0415	0	0.05	0	0.105	0	0.295	0.1215	15.25	0.06	4.76	0.1005	0.38	61.35	0	0	0	0.011	0	0	0	0	0	0	0	0.025	0	0.014	0	0	0
HC16	HC	0.019	0.155	0	0.019	0	0.038	0	0	0	1.02	0	0.069	0	0.67	0	0.315	0	0.735	0	0.105	0	0.565	0.01	0.74	0.0585	19.8	0.029	6.56	0.1155	0.1075	49.6	0.009005	0.119	0	0.013725	0	0	0	0.01728	0.0085	0.375	0	0.15	0	0.0935	0	0.12	0.108
HC17	HC	0	0	0	0	0	0.055	0.055	0.055	0	0	0	0	0	0	0	0	0.0455	0.195	0	0.105	0.1005	2.01	0	1.82	0	7.815	0.19	2.295	0.375	0.79	53.45	0	0	0	0	0	0	0	0	0	0	0	0	0	0	0	0	0
HC18	HC	0.0105	0.054	0	0	0	0.0215	0	0.0105	0	0.0215	0	0.0105	0	0.022	0	0.011	0	0.405	0	0.0535	0	0.89	0.0105	0.73	0.0105	6.965	0.0105	0.965	0.0325	0.155	59.85	0	0.0095	0	0.004695	0	0	0	0	0	0.0595	0	0.004445	0	0.0185	0	0.0185	0
HC19	HC	0	0.05	0	0.049	0	0.1	0	0.05	0	0	0	0.05	0	0.099	0	0	0.05	0.345	0	0.149	0	0.75	0.05	0.15	0.099	13.5	0	1.39	1.445	1.095	47.75	0	0	0	0	0	0.042	0	0	0	0.085	0	0.042	0	0.23	0.042	0.24	0.042
HC2	HC	0	0.068	0	0	0.0105	0.0655	0	0.038	0.0085	0.33	0	0.0295	0.0275	0.585	0.0085	0.155	0.0085	0.125	0	0.076	0	0.355	0	0.33	0.125	11.5	0.0295	1.455	0.305	0.335	56.2	0	0.047	0	0.0115	0	0.018	0	0	0.009	0.31	0.009	0.058	0.009	0.305	0	0.089	0.0225
HC20	HC	0	0.535	0	0	0	0.255	0	0.0355	0	1.53	0	0	0	0.795	0	0.22	0	0.535	0	0.1155	0.3	1.59	0	0.6	0.1155	14.55	0	1.19	0.755	0.405	47.6	0	0.103	0	0	0	0.103	0	0	0	0.1665	0	0	0	0.161	0	0	0
HC24	HC	0.02	0	0	0.017	0	0	0	0	0	0.12	0	0.054	0	0.28	0	0	0	0.495	0.017	0.097	0.02	0.6	0	0.94	0	10.575	0.037	3.755	0.0895	0.22	62.9	0	0.05	0	0.016	0	0.016	0	0.018	0	0.116	0	0.016	0.016	0.142	0	0.032	0
HC3	HC	0	0.0685	0	0.009	0.009	0.029	0	0.006	0	0.1185	0	0.009	0.006	0.0555	0	0.0245	0.006	0.52	0	0.083	0.0205	1.32	0.006	1.715	0.0265	7.17	0	2.045	0.074	0.0655	59.45	0.023	0.1475	0	0	0.0075	0.0465	0	0	0.0075	0.176	0	0.0075	0	0.1325	0	0.015	0.023
HC4	HC	0	0	0	0	0	0.0215	0.014	0.0355	0	0.028	0	0.014	0	0.014	0	0.063	0	0.0435	0	0	0	0.113	0.028	0.1715	0.093	3.395	0	0.45	0.25	0.205	83.75	0	0	0	0	0	0	0	0	0	0.055	0	0	0	0.0265	0	0	0
HC5	HC	0.046	0.176	0.032	0.046	0	0.032	0	0.078	0	0.895	0	0.046	0	0.55	0	0.34	0	0.206	0	0.205	0	0.52	0	0.635	0.122	7.825	0.032	3.965	0.046	0.141	65.65	0.027	0.055	0	0.027	0	0	0	0	0	0.705	0	0.0505	0	0.205	0	0.0785	0
HC6	HC	0.0245	0.0935	0	0	0	0.1595	0.0445	0.21	0.049	0.3	0	0.0245	0	0.125	0	0.1445	0	0.305	0	0.274	0.0445	0.99	0.0245	1.795	0	4.62	0.0445	2.165	0.1195	0.1895	73.45	0.0495	0.1075	0	0.02	0.019	0.019	0	0.04	0.0285	0.205	0.0095	0.019	0	0.078	0	0.039	0
HC7	HC	0	0.042	0	0	0	0.083	0	0.042	0	0.42	0	0.042	0	0.79	0	0.29	0.042	1.04	0	0.17	0	2	0	2.59	0.042	12.3	0	2.17	0.042	0.21	50.1	0	0.093	0	0	0	0.016	0	0.031	0	0.11	0	0.016	0	0.23	0.016	0.031	0
HC8	HC	0	0.077	0	0.039	0	0.08	0	0.08	0	0.535	0	0.038	0	0.23	0	0.039	0	0.264	0	0	0	0.42	0.08	0.42	0.153	15.9	0.23	2.175	0.5	0.885	53.55	0	0	0	0.0225	0	0	0	0	0	0.178	0	0.0225	0	0.0215	0	0	0
HC9	HC	0.0195	0.037	0	0.0695	0	0.037	0.0695	0.0975	0	0.13	0	0.039	0	0.0735	0.165	0.089	0.054	0.375	0	0.089	0	0.62	0.0565	0.65	0.05	10.055	0.0695	1.755	0.52	0.5	53.6	0	0.0085	0	0.016	0	0	0	0	0	0.0165	0.016	0.0085	0	0	0	0	0.0335
S1	S1	0	0.12	0.0275	0	0	0.045	0	0.0275	0	0.44	0	0.0225	0	0.445	0	0.12	0	1.18	0	0.0225	0	1.895	0	1.305	0.195	12.75	0.0275	1.06	0.995	0.57	43.05	0	0.041	0	0	0	0.08	0	0	0.0205	0.135	0	0	0	0.24	0	0.0465	0.086
S10	S1	0	1.415	0.1	0.255	0	0.45	0	0.255	0	2.1	0	0	0	1.005	0	0.295	0	0.81	0	0	0	1.16	0	0.1	0	15.6	0	1.98	0	0	44.35	0	0.135	0	0	0	0.115	0	0.055	0	0.67	0	0.27	0	0.27	0	0	0
S12	S1	0.013	0.131	0.026	0.0235	0	0.106	0	0.026	0.0375	0.16	0.0115	0.013	0.035	0.21	0	0.0495	0.013	0.145	0	0.048	0	0.405	0.0365	0.42	0.145	3.96	0.085	1.015	0.84	1.925	57.8	0.008	0.0255	0	0	0	0	0	0.0085	0.034	0.135	0.0085	0.0085	0.008	0.0505	0.0175	0.0165	0.0085
S13	S1	0	0.016	0	0.0195	0	0.0195	0	0	0	0.0195	0	0	0	0.0555	0	0	0	0.0715	0	0.016	0.016	0.435	0	0.355	0.0995	14.7	0	1.905	0.26	0.225	41.8	0	0.0575	0	0	0	0	0	0	0	0.0275	0	0	0	0.0435	0	0.016	0
S16	S1	0	0	0	0	0	0	0	0	0	0.0895	0	0	0	0.042	0	0	0	1.92	0	0.2175	0	5.975	0	12.71	0.042	7.215	0	1.515	0	0	52.65	0	0.0275	0	0	0	0.06	0	0.031	0	0.0585	0	0	0	0.0585	0	0.0275	0.06
S19	S1	0	0	0	0	0	0	0	0	0	0	0	0	0	0	0	0	0	3.705	0	0.425	0	6.7	0	2.33	0.24	12.61	0	0.88	0.24	0	45.05	0	0	0	0	0	0	0	0	0	0	0	0	0	0	0	0	0.135
S2	S1	0.05	0.415	0	0.235	0	0.31	0.026	0.076	0.05	1.325	0	0.105	0.026	1.795	0	0.235	0	0.415	0	0.131	0	0.65	0.026	0.52	0.365	14.75	0.106	2.29	0.65	0.985	48.65	0.0385	0.215	0	0.038	0	0.059	0	0	0.069	0.96	0.029	0.205	0.0095	0.37	0	0.085	0
S20	S1	0	0	0	0	0	0.0995	0	0.12	0	0.12	0	0	0	0.18	0	0.06	0.06	0.955	0	0.0995	0	2.1	0	0.305	0.06	12.85	0	0.95	0.14	0.245	40.75	0	0	0	0	0	0	0	0	0	0.135	0	0.035	0	0.06	0	0.0555	0
S21	S1	0	0	0	0	0	0	0	0	0	0	0	0	0	0	0	0	0	0	0	0	0	0.665	0	0.665	0	25.5	0	3.265	0	0.24	42.15	0	0	0	0	0	0	0	0	0	0.055	0	0	0	0	0	0.055	0
S22	S1	0	0.067	0	0	0	0	0	0.0395	0	0.014	0	0	0	0	0	0	0.014	0.0915	0	0.014	0	0.215	0	0.29	0.295	16.65	0.067	1.52	0.59	0.625	39.75	0	0	0	0	0	0	0	0.0065	0	0.013	0.0065	0.0065	0	0	0	0	0.0065
S23	S1	0	0	0	0	0	0	0	0	0	0	0	0	0	0	0	0	0	2	0	0	0	1.725	0	2	0	13.15	0	0	0	4	58.75	0	1.47	0	0	0	0	0	0	0	0	0	0	0	0	0	0	0
S24	S1	0	0	0	0	0	0	0	0.375	0	0.375	0	0	0	0.375	0	0.375	0	0.325	0	0	0	0	0	0.7	0	5.965	0	0.325	0	0.325	65.35	0	0	0	0	0	0.046	0	0	0	0.181	0	0	0	0.29	0	0.111	0
S3	S1	0.06	0.645	0	0.06	0	0.51	0	0.06	0	1.005	0	0.0455	0	1.515	0	0.115	0	2.505	0	0	0.25	3.555	0.06	2.345	0.09	15.95	0.0455	1.285	0.405	0.135	32.85	0	0.705	0	0	0	0.265	0	0.0325	0.0355	1.185	0	0.1305	0.07	1.11	0	0.295	0.068
S5	S1	0	0.275	0.275	0	0	0	0.09	0.09	0	0	0	0	0	0	0	0.18	0.09	1.015	0	0.09	0	1.47	0.09	3.495	0	7.875	0.09	1.005	0.28	0.465	59	0	0.0275	0	0	0	0	0	0	0	0	0	0	0	0.0245	0	0	0
S6	S1	0	0.53	0	0	0.08	0.505	0	0	0	0.24	0	0	0	0.25	0	0	0	4.75	0.09	0.08	0.17	7.065	0	2.375	0	12.75	0	0.53	0.32	0.16	38.85	0	0.36	0	0	0	0.0425	0	0	0	0.1745	0	0	0	0.092	0	0	0.3045
S7	S1	0	0	0	0.0735	0	0.18	0	0.0385	0	0.215	0	0.035	0	0.515	0	0.215	0.1785	1.775	0	0.405	0.105	2.705	0.0735	1.66	0.2835	13.1	0.0735	3.395	0.835	1.16	40.1	0	0.085	0	0.0445	0	0.175	0	0	0	0.2615	0	0.1295	0	0.59	0	0.0445	0
S8	S1	0	0.325	0.0195	0.0395	0.042	0.1655	0	0.062	0.0195	0.345	0	0.0195	0	0.47	0	0.1255	0.042	4.76	0	0.365	0.28	7.985	0.09	4.915	0.0895	12.05	0	0.895	0.265	0.31	39.25	0.015	0.42	0	0	0.017	0.125	0	0.015	0.015	0.615	0	0.0295	0	0.64	0	0.19	0.155
S9	S1	0	0.055	0	0.0225	0.00435	0.055	0	0.0325	0	0.22	0	0.01674	0.01185	0.455	0.00435	0.2	0.00374	0.465	0.00374	0.1	0.0185	0.685	0.01185	1.805	0.059	10.2	0.0285	1.535	0.075	0.15	62.85	0.006	0.0805	0.0065	0	0.0065	0.0065	0	0	0	0.325	0	0.03	0.006	0.235	0	0.0935	0.006
S1	S2	0	0.185	0	0.0415	0.0235	0.22	0	0.0415	0.018	0.56	0	0.0355	0.0785	0.92	0	0.165	0	0.85	0	0.07	0.0645	1.335	0	0.965	0.1485	12.65	0.0235	0.585	0.92	0.545	37.55	0.014	0.1375	0	0	0	0.104	0	0.028	0	0.59	0	0.0515	0.033	0.365	0	0.103	0.019
S10	S2	0	0.87	0	0	0	0.18	0	0	0	2.69	0	0.14	0	2.975	0.14	0.18	0	0.505	0	0.285	0	1.03	0	1.44	0.14	12.85	0	2.265	0	0.18	45.45	0	0.505	0	0	0	0.18	0	0	0	1.66	0	0.325	0	0.29	0	0	0
S11	S2	0	0.055	0	0.0955	0	0	0	0.055	0	0	0	0	0	0	0	0	0.0405	1.185	0	0.0955	0.12	8.4	0.16	5.48	0.0405	4.295	0	0.66	0.51	0.34	39.35	0	0	0	0	0	0	0	0.0265	0	0	0	0	0	0	0	0	0.105
S12	S2	0.096	0.13	0.45	0.13	0	0.1025	0.275	0.055	0.013	0.535	0.055	0.045	0.029	0.415	0.0585	0.27	0.016	0.081	0.013	0.087	0.013	0.225	0	0.232	0.013	3.66	0.0425	0.62	0.52	1.605	62.15	0	0	0	0	0	0.021	0	0.01	0	0.24	0	0.007	0	0.26	0	0.0275	0
S13	S2	0	0	0	0	0	0	0	0	0	0.0445	0	0	0	0	0	0	0	0.0445	0	0	0	0.17	0	0.085	0	14.05	0	4.35	0.135	0.175	52.55	0	0.0445	0	0	0	0	0	0	0	0	0	0	0	0	0	0	0
S14	S2	0	0.1115	0	0	0	0	0	0.065	0	0.32	0	0	0.0265	0.65	0	0.0315	0	0.145	0	0.095	0	0.15	0.0265	0.45	0.27	9.57	0.1615	1.37	1.23	1.43	49.65	0	0.019	0	0.019	0	0.021	0.019	0.019	0	0.076	0	0.04	0	0.16	0	0.1025	0.021
S16	S2	0	0.029	0	0	0	0	0	0.027	0	0.029	0	0	0	0.027	0	0.027	0	0.415	0	0.22	0	2.695	0	6.995	0	3.52	0	1.065	0.056	0.056	69	0	0	0	0	0	0	0	0	0	0.031	0	0	0	0.031	0	0.057	0
S19	S2	0.0275	0.028	0.0095	0	0	0.0275	0	0.0365	0.0275	0.0185	0	0	0.0185	0.0275	0	0.0995	0	0.0275	0	0	0.0095	0.255	0	0.2	0.046	7.29	0.018	0.42	0.405	0.455	57.25	0	0	0	0	0	0	0	0	0	0.0305	0	0	0	0.09	0	0	0
S2	S2	0.0195	0.185	0	0.0365	0.0195	0.1115	0	0.1235	0.012	1	0	0.0365	0.087	1.585	0.0195	0.32	0	0.48	0	0.1835	0.0245	0.495	0.0365	0.83	0.1235	15.2	0.155	3.195	0.65	0.96	49.95	0.0205	0.051	0	0	0	0.0205	0	0.008	0.014	0.73	0	0.1035	0.016	0.43	0	0.0875	0
S20	S2	0.004355	0.047	0	0	0.004355	0.043	0	0.004355	0	0.305	0	0.004355	0	0.265	0.004355	0.071	0.009855	0.305	0	0.035	0.0105	0.64	0	0.43	0.1075	15.3	0.062	1.855	0.46	0.43	43.4	0.015165	0.0405	0	0	0	0.0145	0	0.003165	0.00405	0.335	0	0.0065	0.011165	0.355	0	0.0465	0.01055
S21	S2	0	0	0	0	0	0.054	0	0.0365	0	0.195	0	0	0	0.11	0.0365	0.0365	0	0.18	0	0	0	0.085	0	0.18	0.035	23.2	0.11	3.095	0.305	0.285	41.5	0	0	0	0	0	0.0265	0	0	0	0.245	0	0.028	0	0.0685	0	0.0545	0.014
S22	S2	0.006	0.025	0	0.006	0	0.012	0	0	0	0.0145	0	0	0.006	0.0145	0	0	0.0085	0.21	0	0.0225	0.006	0.0905	0	0.12	0.32	17.8	0.074	1.81	0.735	0.68	38	0	0.01407	0	0.00357	0	0.00357	0	0	0	0.012	0	0	0	0.00857	0	0.00357	0.00857
S23	S2	0.145	0.145	0.075	0.22	0	0.145	0.145	0.215	0	0.145	0	0.07	0.075	0.285	0	0	0	0.855	0	0.145	0.075	1.495	0.075	2.135	0.14	10.635	0.07	1.94	0.94	1.93	49.4	0	0.075	0	0	0	0	0	0	0	0.31	0	0	0	0.155	0	0.079	0.038
S24	S2	0	0.047	0	0	0	0.0195	0	0.0195	0	0.425	0	0.0235	0.0195	0.655	0	0.1035	0.0195	0.06	0	0.0195	0	0.167	0	0.1095	0	5.085	0	0.655	0.285	0.295	66.45	0.005	0.01	0	0	0	0.005	0	0	0	0.315	0	0.0375	0.016	0.515	0	0.049	0
S3	S2	0.0175	0.29	0	0.009	0.009	0.33	0	0.025	0	0.735	0	0	0.009	1.115	0	0.1275	0	1.82	0	0.089	0.15	4.355	0.0915	2.345	0.0865	12.75	0.016	0.4	0.48	0.315	35.15	0.0215	0.61	0	0	0	0.49	0	0.0215	0	1.47	0	0.0075	0.0145	1.67	0.0075	0.21	0.072
S4	S2	0	0.1265	0.0255	0.05	0	0.1	0.0255	0.075	0	0.0265	0	0	0	0	0	0.055	0	1.135	0	0.1015	0	2.025	0	1.445	0	17.55	0.0255	1.69	0.155	0.155	42.95	0.016	0	0	0	0	0.016	0	0.032	0	0	0	0	0	0.032	0	0.016	0
S5	S2	0	0.037	0	0.037	0	0.1445	0.0715	0.0345	0	0	0	0	0	0	0	0	0	0.0345	0	0	0.037	0.32	0	0.53	0.215	5.09	0.037	0.65	1.135	0.505	73.3	0	0	0	0	0	0.0275	0	0	0	0.1025	0	0	0	0.1025	0	0	0.055
S6	S2	0.05	0.049	0	0.017	0.0245	0.0335	0	0	0	0.245	0	0	0.0155	0.225	0	0.0245	0.0335	0.355	0	0.0075	0.0075	0.575	0.0075	0.155	0.19	16.25	0	0.79	0.805	0.29	38.1	0	0.0205	0	0	0	0.0205	0	0	0	0.34	0	0.0205	0	0.2005	0	0.0405	0
S7	S2	0.037	0.305	0	0	0.037	0.156	0.0185	0.075	0	0.565	0	0.0185	0	0.46	0.009	0.156	0.055	1.9	0.0185	0.33	0.055	2.5	0.037	1.82	0.205	21.95	0.165	3.68	0.625	0.885	30.6	0.0245	0.075	0	0	0	0.08	0	0	0	0.435	0	0.0745	0	0.165	0.026	0.0745	0.0625
S8	S2	0	0.22	0.014	0.0105	0.0105	0.15	0	0.0245	0	0.27	0	0	0	0.365	0.0105	0.049	0.0525	1.42	0.0105	0.063	0.103	3.225	0.0595	2.14	0.0975	14.9	0.028	0.91	0.335	0.275	42.75	0	0.27	0	0	0	0.255	0	0.0125	0.0345	0.61	0	0	0	0.495	0	0.037	0.0715
S9	S2	0	0.0935	0	0.00749	0.00749	0.059	0	0.0305	0.00473	0.38	0.00473	0.044	0.00276	0.36	0.0085	0.275	0.00749	0.54	0.00276	0.17	0.01023	0.81	0.025	3.375	0.033	11.75	0.025	2.735	0.108	0.1145	61	0.0065	0.0575	0	0.003275	0.003275	0.025775	0.008775	0.025	0	0.44	0	0.0775	0	0.285	0	0.175	0.020275
[truncated: 77 more columns]
