# Supplementary material for: Selective loss of CD107a TIGIT+ memory HIV-1-specific CD8+ T cells in PLWH over a decade of ART
Source: eLife. 2023 Sep 19;12:e83737. doi: 10.7554/eLife.83737 (PMC10508883; doi:10.7554/eLife.83737)
Supplement: Figure 1—source data 4. [file elife-83737-fig1-data4.xlsx]

## Sheet: % Populations
Patients	Group	CD8	Naive	CM	TM	EM	Eff
EI1	Ei	8.47	20.2	11.95	19.05	25.85	6.085
EI10	Ei	21.6	40.5	4.715	23.3	19	7.81
EI11	Ei	NA	NA	NA	NA	NA	NA
EI13	Ei	NA	NA	NA	NA	NA	NA
EI16	Ei	25.6	14.2	12.05	18.15	36.4	10.985
EI17	Ei	44.8	10.45	8.09	27.3	24.6	17.05
EI18	Ei	25.45	40.2	4.585	20.7	22	6.76
EI19	Ei	22.55	34.15	19.75	16.25	10.6	11.75
EI2	Ei	23.95	53.25	7.835	9.57	13.65	8.705
EI20	Ei	26.1	11.55	10.19	19.7	28.9	21.65
EI21	Ei	14.4	19	5.46	30	22.55	17.3
EI22	Ei	13	23.35	4.35	10.3	50.2	8.475
EI23	Ei	45.95	3.675	1.865	34.55	45.1	7.91
EI24	Ei	31.5	19.1	3.72	19.45	38	13.65
EI3	Ei	17.1	22.4	7.65	37.3	18.65	5.575
EI4	Ei	17.1	22.4	10.9	18.25	27.45	11.7
EI5	Ei	21.3	18	7.845	20.9	28.85	13.25
EI6	Ei	23.35	12.9	9.785	44.2	16.35	4.96
EI7	Ei	17.05	10.7	19.5	15.95	40.4	2.815
EI8	Ei	18.4	35.4	4.355	6.65	40.45	10.165
EI9	Ei	16.75	7.3	3.065	16.1	35.4	29.5
HC1	HC	26.55	15.605	9.55	15.45	35.2	3.71
HC10	HC	11.5	28.2	14.35	14.65	8.035	27.7
HC11	HC	7.58	71.95	5.01	11.05	4.52	1.69
HC12	HC	25.95	6.71	10.35	33.35	30.15	12.7
HC14	HC	16.5	29.2	6.475	43.5	11.8	2.57
HC15	HC	12.8	46.5	8.915	16.9	20.55	2.54
HC16	HC	37.4	12.1	7.2	15.7	42.5	13.95
HC17	HC	11.4	49.4	10.3	15.55	15.45	4.715
HC18	HC	27.7	31.8	10.7	25.55	20.95	4.59
HC19	HC	7.77	25.05	20.65	26.8	15.7	3.755
HC2	HC	14.25	31.6	15.1	14.15	24.3	7.655
HC20	HC	10.875	24	6.295	12.2	13.65	36.95
HC24	HC	22.8	29.65	25.6	27.6	7.795	0.715
HC3	HC	26.55	19.3	25.25	16.45	22.55	4.64
HC4	HC	7.705	15.5	15.2	9.11	44.95	10.5
HC5	HC	10.8	72.2	5.125	7.8	7.145	2.61
HC6	HC	21.4	46.8	5.5	13.2	18.85	7.73
HC7	HC	24.7	4.2	5.385	14.4	26.15	40.8
HC8	HC	10.45	40.35	14.95	25.9	6.655	5.4
HC9	HC	11.375	30.3	11.7	27.1	18.05	3.765
S1	S1	29.3	47.15	12.55	13.6	14.25	4.715
S10	S1	20.95	27.25	6.965	12.5	31.35	15.2
S12	S1	33.3	26.45	7.715	11.25	36.45	9.19
S13	S1	32.75	29.95	11.55	13.8	31.75	5.775
S16	S1	48.85	23.85	15.15	23.2	25	5.395
S19	S1	33.95	16.3	12.85	19	28.75	12.85
S2	S1	33.7	61.75	5	13.35	11.1	3.75
S20	S1	51.6	42	6.985	12.95	28.5	5.155
S21	S1	40.3	22.85	2.775	13.6	20.5	32.9
S22	S1	40.15	14.25	7.695	15.5	33.15	23.15
S23	S1	14.95	36.15	2.175	2.205	15.6	37.4
S24	S1	28.65	32.1	2.015	12.65	22.75	21.25
S3	S1	46.45	24.9	3.75	5.695	14.25	43.95
S5	S1	36.25	71.1	3.045	10.85	6.02	4.495
S6	S1	29.95	33.05	6.99	13.1	24.3	15.85
S7	S1	21.35	29.4	12.35	10.55	36.8	5.92
S8	S1	45.9	10.3	3.805	5.065	57.05	18.9
S9	S1	40.4	16.55	27.7	17.95	15.65	10.9
S1	S2	21.75	39.05	9.98	12.5	13.55	16.95
S10	S2	16.05	27	6.45	6.415	26.6	27.25
S11	S2	22.5	49.6	10.07	15.35	6.095	10.3
S12	S2	21.5	20.2	8.255	14.2	37.65	7.63
S13	S2	28.65	17.75	16.9	18.85	31.85	4.875
S14	S2	20.7	25.35	11.3	16.45	16.75	21.35
S16	S2	48.85	6.8	30	29.6	20.3	3.215
S19	S2	18.4	30.65	25.65	15.6	10.31	8.11
S2	S2	34.9	66.85	5.62	12.1	9.13	1.31
S20	S2	37.55	44.05	14.1	18.85	13.25	4.875
S21	S2	31.25	35	6.1	7.94	35.15	11.25
S22	S2	36.9	15.35	11.85	19.15	24.55	22.15
S23	S2	13.9	28.7	4.83	8.73	16.85	32.45
S24	S2	25.3	44.35	3.155	12.1	25.95	7.53
S3	S2	51.3	21.35	4.48	5.165	12.15	50.5
S4	S2	18.05	25.75	8.9725	12.4625	39.975	7.2875
S5	S2	31.25	77.5	4.845	4.5725	5.4825	2.5625
S6	S2	18.35	65.5	13	5.16	6.305	4.85
S7	S2	17.1	24.45	18.2	12.65	33.7	5.235
S8	S2	33.5	15.75	5.535	5.745	40.45	26.9
S9	S2	29.2	10.8	31.25	26.2	13.45	6.18

## Sheet: % TIGIT
Patients	Group	CD8_TIGIT	Naive_TIGIT	CM_TIGIT	TM_TIGIT	EM_TIGIT	Eff_TIGIT
EI1	Ei	53.95	7.065	46.7	68.05	73.75	92.5
EI10	Ei	44.75	2.06	40.95	72.7	75.6	96.35
EI11	Ei	NA	NA	NA	NA	NA	NA
EI13	Ei	NA	NA	NA	NA	NA	NA
EI16	Ei	45.15	6.26	48.85	71.3	38.8	54.7
EI17	Ei	59.6	7.185	40.8	73.05	60.45	71.35
EI18	Ei	41.8	0.66	32.55	83.25	60.75	84.95
EI19	Ei	36.75	5.255	39.8	65.8	39.55	70.4
EI2	Ei	39.95	4.135	66	85.25	82.7	91.55
EI20	Ei	61.4	14.9	49.1	75.1	59.3	78.7
EI21	Ei	56.3	4.58	63.65	84.9	50.35	64.35
EI22	Ei	52.45	4.22	63.35	81.9	63.6	71
EI23	Ei	52.5	7.025	51.6	75.45	29.3	85.85
EI24	Ei	45.6	2.575	32.5	79.35	48.65	49.25
EI3	Ei	62.45	5.595	64.5	86.1	69.1	83.85
EI4	Ei	50.35	1.065	29.05	66.05	69	94.3
EI5	Ei	35	2.445	31	60.5	31.65	42.75
EI6	Ei	64.1	7.63	50.15	75.1	65.35	93.55
EI7	Ei	44.35	2.295	36.95	60.55	49.2	80.4
EI8	Ei	24.65	2.23	42.35	70.25	16.65	87.45
EI9	Ei	71.25	4.16	32.45	90.6	62.05	89.2
HC1	HC	46.3	4.44	41.4	60.95	58.6	74.7
HC10	HC	52.1	1.54	32.15	59.75	79.45	99.7
HC11	HC	8.205	1.505	25.35	20.3	15.5	66.2
HC12	HC	27.6	9.995	34.3	15.95	28.2	54.65
HC14	HC	33.3	3.07	61.85	39.5	40.6	88.9
HC15	HC	21.95	1.355	32.8	51.45	28.65	72.1
HC16	HC	26.1	6.265	42.45	42.65	20.25	28.7
HC17	HC	30.4	1.425	41.3	42.1	77.55	89.5
HC18	HC	36.75	0.78	38.2	55.05	54.85	84.8
HC19	HC	37.55	6.235	49.3	53.85	25.2	75.15
HC2	HC	48.25	5.04	41.35	63.25	81.85	92.6
HC20	HC	67.45	3.88	49.8	70.3	92	99.5
HC24	HC	27	2.205	32	44.2	24.15	70.8
HC3	HC	40.35	2.6	36.55	71	46	68.5
HC4	HC	42.3	3.43	15.3	61.15	57.45	55.15
HC5	HC	11.7	1.22	28.85	46.7	34.45	65
HC6	HC	22.95	0.905	21.6	56.15	36.55	54.1
HC7	HC	73.25	6.435	47.35	72.65	77.3	81.4
HC8	HC	38.85	1.47	42.45	68.95	64.3	99.15
HC9	HC	27.55	4.95	42.7	35.85	18.4	83.3
S1	S1	37.6	6.8	53.8	68.5	57.85	81.1
S10	S1	39.8	3.795	52.65	70.3	27.35	72.55
S12	S1	42.2	5.045	38.5	47.05	48.9	72.25
S13	S1	48.45	7.82	55.65	69.75	52.95	76.05
S16	S1	38.2	2.345	32.95	54.5	36.75	70.2
S19	S1	56	10.265	51.35	71.25	48.65	61.3
S2	S1	22.6	1.49	46.6	51.55	52.45	75.45
S20	S1	37.85	1.675	57.45	71.8	51.95	71.8
S21	S1	42.95	6.925	53.65	53.55	35.35	47.85
S22	S1	67.9	6.785	57.7	81.6	64.35	92.6
S23	S1	48.2	2.43	35.25	81.6	51.55	79.8
S24	S1	49.15	1.285	32.55	74.35	50.1	91.1
S3	S1	52.85	7.84	63	80.1	51.35	66.15
S5	S1	24	1.89	35.2	86.8	77.75	90
S6	S1	52.3	4.675	57.9	88.55	57.6	76.4
S7	S1	51.15	9.25	52.75	60.7	66.35	87.85
S8	S1	69.5	4.865	53.9	79.7	74	80.95
S9	S1	48.5	9.925	33.25	60.3	55.1	76.5
S1	S2	45.05	7.23	60	76.45	62.85	65.9
S10	S2	48.25	4.155	49.9	59.2	35.35	90.25
S11	S2	39.35	4.805	53.75	62.95	64.7	91.7
S12	S2	42.85	5.1	33.95	40.85	48.9	72.95
S13	S2	38.9	5.235	42.85	46.65	30.4	47.95
S14	S2	59.1	7.325	46.7	69.75	67.4	95.15
S16	S2	36.9	2.86	22.6	36.2	39.75	80.2
S19	S2	50.05	7.195	41.5	72.2	81.15	95.65
S2	S2	17.1	0.975	44.1	48.95	42.5	59.25
S20	S2	37.25	1.14	53.7	70.65	59.9	48.1
S21	S2	24.45	5.03	54.7	43.9	18.7	38.3
S22	S2	69.25	4.53	59.3	77.15	72.6	94.8
S23	S2	57.55	4.965	43.55	51.8	70.15	89.7
S24	S2	33.9	1.285	32.35	68.4	45.9	69.3
S3	S2	64.8	4.985	61.45	82.9	61.2	85.7
S4	S2	45.65	1.4175	50.05	78.575	47.825	64.3
S5	S2	14.525	2.0325	29.375	58.725	70.925	85.4
S6	S2	33.8	11.15	60.65	73.55	59.45	76.55
S7	S2	55.85	10.48	60.625	70	65.05	86.475
S8	S2	70.6	3.255	53.7	82.2	80.05	90.8
S9	S2	48.8	16.1	32.15	53.9	58.2	82.2

## Sheet: % PD-1
Patients	Group	CD8_PD-1	Naive_PD-1	CM_PD-1	TM_PD-1	EM_PD-1	Eff_PD-1
EI1	Ei	12.9	0.69	7.93	32.25	12.9	6.635
EI10	Ei	23.85	0.33	17.5	70.75	19.4	10.4
EI11	Ei	NA	NA	NA	NA	NA	NA
EI13	Ei	NA	NA	NA	NA	NA	NA
EI16	Ei	13.5	0.8	9.55	31.85	12.7	5.4
EI17	Ei	20.3	1.19	10.33	40.45	17.5	9.155
EI18	Ei	30.4	0.34	16.45	79.65	42.2	19.3
EI19	Ei	12.45	0.555	11.85	46.1	8.42	2.18
EI2	Ei	12	0.76	20.35	51.15	18.95	9.725
EI20	Ei	24.3	2.335	19.2	60.75	21.4	5.995
EI21	Ei	23.5	0.66	27.75	50.55	17.75	7.17
EI22	Ei	13.35	0.27	18.9	51.5	11.7	7.285
EI23	Ei	27.45	1.025	15.45	48.3	18.55	6.08
EI24	Ei	20.15	0.225	9.285	61.6	14.15	8.005
EI3	Ei	35.75	0.84	29.9	60.2	33.7	21.25
EI4	Ei	22.45	0.405	8.99	51.15	34.05	6.025
EI5	Ei	26.45	0.845	17.8	58.65	25.45	14.2
EI6	Ei	40.5	2.22	25.45	60.85	35.55	14.9
EI7	Ei	11.6	0.375	4.315	21.8	15.55	1.815
EI8	Ei	6.475	0.285	12.3	57.7	3.01	2.82
EI9	Ei	29.4	0.635	5.97	70.55	27.55	17
HC1	HC	17.15	0.605	9.475	39.05	20.7	21.75
HC10	HC	7.23	0.27	4.155	30.55	13.2	0.795
HC11	HC	7.165	0.55	15.9	32.15	25.55	8.59
HC12	HC	19.85	2.79	11.15	35.6	15.15	6.285
HC14	HC	29.9	0.33	29.8	45.25	49.05	23.5
HC15	HC	30.2	0.495	20.4	69.25	66.85	28.7
HC16	HC	15.15	0.94	28.6	49.9	7.92	3.545
HC17	HC	10.45	0.23	10.625	42.35	12.75	2.155
HC18	HC	13.8	0.23	8.51	37.75	10.6	1.4
HC19	HC	13.2	0.615	15.7	29.1	5.175	2.39
HC2	HC	18.5	0.665	13.7	54.25	25.7	6.66
HC20	HC	19.95	0.465	18.6	66.35	46.8	7.14
HC24	HC	19.45	0.605	15.2	36.35	48.6	9.53
HC3	HC	18.4	1.235	10.035	37.1	29.85	15.45
HC4	HC	8.05	0.59	4.025	38.6	6.52	3.77
HC5	HC	12.65	0.41	13.55	52.65	69.1	39.85
HC6	HC	22	0.21	7.895	56.15	48.65	31.65
HC7	HC	16.5	1.99	17.35	52.6	18.25	2.995
HC8	HC	22.6	0.3	19.4	57.3	31	16.1
HC9	HC	30.1	0.86	12.75	52.65	47.9	55.1
S1	S1	12.7	0.72	15.85	42.9	18	8.015
S10	S1	20.5	0.665	22.25	60.3	22.85	14.65
S12	S1	18.6	0.525	5.84	30	30.15	18.75
S13	S1	20.55	0.67	16.85	52.8	25.7	18
S16	S1	17.4	0.48	11	36.85	21.6	6.515
S19	S1	18.7	1.58	17.9	42.25	15.95	8.285
S2	S1	15.85	0.53	20.2	53.15	44.5	20.2
S20	S1	11	0.365	15.05	36.15	14.9	3.34
S21	S1	21.3	1.27	28.75	59.25	41.5	4.03
S22	S1	21.7	1.02	18.7	58.1	20.75	10.35
S23	S1	8.44	0.91	15.15	52.8	20.55	5.7
S24	S1	13.15	0.41	6.985	53.15	15.8	2.885
S3	S1	11.55	1.3	21.7	50.75	18.85	7.29
S5	S1	10.9	0.32	10.735	65.35	28.45	11.395
S6	S1	17.95	0.455	18.95	52.8	23.25	13.3
S7	S1	10.8	0.405	19.55	33.7	9.625	6.155
S8	S1	12.3	0.7	19	49.3	11.85	7.085
S9	S1	20.25	1.56	12.7	47.65	25.95	12.6
S1	S2	13.75	0.775	15.2	48.4	20.2	8.17
S10	S2	16.95	0.42	19.75	53.8	34.15	6.275
S11	S2	5.89	0.375	6.47	22.85	11.5	1.215
S12	S2	15.2	0.61	5.99	19	23.95	14.25
S13	S2	20.85	0.875	18.45	40.15	22.55	13.25
S14	S2	9.975	0.925	12.05	31.3	9.91	1.595
S16	S2	16.15	0.605	5.28	21.95	31.55	5.21
S19	S2	10.55	0.895	7.915	30.85	13.4	5.34
S2	S2	14.15	0.29	20.65	52.75	50.1	27.35
S20	S2	15.1	0.175	18	46.85	18.85	0.955
S21	S2	14.55	0.765	26.8	53.15	19.95	3.425
S22	S2	22.5	0.77	20.35	51.85	24.05	9.825
S23	S2	8.895	0.965	14.55	41.85	10.85	3.005
S24	S2	10.15	0.295	6.335	46.15	9.99	4.515
S3	S2	6.875	0.68	16.25	38.4	9.8	3.58
S4	S2	8.91	0.2375	19.5	31.525	5.615	2.04
S5	S2	4.34	0.205	8.0075	42.4	19.75	7.8125
S6	S2	8.515	0.97	17.95	51.4	21.55	7.625
S7	S2	15.6	0.7875	26.5	44.475	10.245	6.78
S8	S2	10.7	0.53	17.95	49	11.5	4.215
S9	S2	23.35	2.88	15.8	43.5	23.4	13.65

## Sheet: % LAG-3
Patients	Group	CD8_LAG-3	Naive_LAG-3	CM_LAG-3	TM_LAG-3	EM_LAG-3	Eff_LAG-3
EI1	Ei	0.625	0.225	1.11	0.305	0.55	1.555
EI10	Ei	22.8	3.245	23.7	36.65	33.8	50.45
EI11	Ei	NA	NA	NA	NA	NA	NA
EI13	Ei	NA	NA	NA	NA	NA	NA
EI16	Ei	3.23	1.2	3.235	5.13	2.82	3.455
EI17	Ei	2.83	0.885	3.08	2.64	2.655	3.945
EI18	Ei	1.84	0.42	1.305	1.975	2.92	5.01
EI19	Ei	0.345	0.28	0.49	0.36	0.13	0.38
EI2	Ei	7.525	0.855	9.605	18.4	15.5	18.2
EI20	Ei	4.58	0.98	3.82	6.3	4	5.845
EI21	Ei	3.375	0.425	3.975	4.47	3.035	4.675
EI22	Ei	4.465	0.87	6.9	7.95	4.555	6.66
EI23	Ei	0.145	0.0745	0.98	0.14	0.0555	0.17
EI24	Ei	1.745	0.19	1.2	1.72	2.19	2.64
EI3	Ei	4.55	0.96	7.205	5.635	4.755	4.855
EI4	Ei	1.59	0.75	1.555	2.99	1.125	2.28
EI5	Ei	10.125	2.57	10.375	12.25	11.175	13.95
EI6	Ei	19.75	2.415	14.95	23.55	21.8	28.15
EI7	Ei	2.675	0.46	3.84	4.015	2.08	3.94
EI8	Ei	17.65	3.245	14.9	27.9	21.75	43.05
EI9	Ei	32.7	8.145	24.95	39.85	30.25	37.75
HC1	HC	0.395	0.355	0.99	0.325	0.255	0.72
HC10	HC	1.205	0.305	0.49	0.52	1.315	2.765
HC11	HC	2.34	1.085	8.345	2.15	2.7	12.25
HC12	HC	6.365	2.65	3.195	3.42	7.375	15.45
HC14	HC	0.145	0.135	0.495	0.092	0.0765	0.17
HC15	HC	0.41	0.31	0.685	0.475	0.22	0.985
HC16	HC	6.01	0.56	2.39	4.74	7.605	8.245
HC17	HC	4.74	1.005	4.435	5.86	13.5	9.22
HC18	HC	1.455	0.375	2.185	1.715	1.805	3.485
HC19	HC	1.885	0.49	1.75	2.2	1.91	3.41
HC2	HC	2.425	0.525	1.075	1.56	4.5	7.39
HC20	HC	2.615	0.67	3.975	2.59	2.225	3.515
HC24	HC	1.655	0.585	2.205	1.935	2.045	3.24
HC3	HC	5.12	1.2	3.8	5.99	6.75	17.75
HC4	HC	0.525	0.39	0.43	0.705	0.505	0.79
HC5	HC	0.66	0.505	1.975	0.805	0.35	0.53
HC6	HC	2.905	1.405	3.96	4.685	3.645	4.855
HC7	HC	10	4.43	5.57	9.145	13.05	9.04
HC8	HC	1.17	0.41	1.455	1.66	1.395	2.4
HC9	HC	1.675	0.405	2.17	1.76	2.005	4.075
S1	S1	4.6	1.04	4.625	6.34	11.65	12.35
S10	S1	2.765	2.23	4.54	2.31	2.315	2.965
S12	S1	0.625	0.485	1.4	0.53	0.41	0.67
S13	S1	1	0.395	0.95	0.835	1.21	3.03
S16	S1	20.05	7.45	20.8	18.55	28.5	33.4
S19	S1	11.535	6.79	13.155	13.015	11.175	13.16
S2	S1	1.61	1.205	2.865	1.66	2.09	3.19
S20	S1	3.925	0.765	3.745	5.76	7.13	6.695
S21	S1	2.48	0.615	1.335	2.93	2.285	3.495
S22	S1	0.8	0.535	0.73	0.69	0.57	1.24
S23	S1	6.485	2.705	5.725	4.41	4.56	10.755
S24	S1	0.355	0.175	1.395	0.23	0.096	0.845
S3	S1	18	2.55	10.05	12.15	13.1	31
S5	S1	4.2	1.4	6.98	10.8	9.505	18.6
S6	S1	16.75	3.255	15.65	24.25	20.5	32.5
S7	S1	9.835	0.945	7.195	11.13	14.5	24.9
S8	S1	37.55	3.465	19.1	26.7	45.2	40.4
S9	S1	5.37	3.005	3.26	5.685	7.515	10.9
S1	S2	7.04	1.685	3.795	5.125	8.52	20.5
S10	S2	3.52	0.94	4.315	4.085	5.01	4.17
S11	S2	12.65	4.71	15.7	16.3	21.8	32.35
S12	S2	0.605	0.39	1.9	0.22	0.185	0.14
S13	S2	0.53	0.42	0.2945	0.25	0.545	1.295
S14	S2	1.2	0.715	1.035	0.995	1.35	1.81
S16	S2	10.85	5.445	10.4	8.33	14.2	23.3
S19	S2	0.835	0.54	0.625	0.67	0.835	2.185
S2	S2	0.925	0.66	2.55	0.93	1.335	1.365
S20	S2	1.115	0.24	1.525	1.95	2.02	1.435
S21	S2	1.38	0.195	0.535	1.665	1.75	3.56
S22	S2	0.465	0.305	0.505	0.34	0.345	0.67
S23	S2	3.39	1.675	5.855	2.56	2.325	4.64
S24	S2	0.225	0.185	0.46	0.155	0.145	0.695
S3	S2	33.4	2.19	9.525	13.1	22.15	55.65
S4	S2	37.445	22.0925	36.9325	44.45	43.66	42.98
S5	S2	1.01	0.5025	1.47	2.3325	3.4275	6.005
S6	S2	1.345	0.82	1.315	1.455	2.22	5.67
S7	S2	7.565	1.54	6.3125	9.995	9.2225	18.55
S8	S2	20.5	1.515	7.5	10.12	17.7	41.8
S9	S2	5.91	7.655	5.14	4.925	6.86	9.64

## Sheet: % TIM-3
Patients	Group	CD8_TIM-3	Naive_TIM-3	CM_TIM-3	TM_TIM-3	EM_TIM-3	Eff_TIM-3
EI1	Ei	2.89	1.65	2.035	1.73	2.88	9.465
EI10	Ei	0.395	0.131	1.84	0.745	0.1785	0.33
EI11	Ei	NA	NA	NA	NA	NA	NA
EI13	Ei	NA	NA	NA	NA	NA	NA
EI16	Ei	0.35	0.25	0.53	0.435	0.31	0.255
EI17	Ei	0.55	0.365	0.53	0.42	0.41	1.185
EI18	Ei	1.145	0.2	1.82	2.16	1.15	2.795
EI19	Ei	2.285	1.555	4.47	2.98	0.575	0.385
EI2	Ei	1.43	1.555	1.14	1.59	1.06	1.72
EI20	Ei	0.79	0.43	0.66	0.65	0.55	1.3
EI21	Ei	1.27	0.37	1.44	0.805	1.355	2.575
EI22	Ei	1.825	0.53	3.92	3.755	1.46	3.33
EI23	Ei	0.34	0.64	0.405	0.625	0.097	0.28
EI24	Ei	0.95	0.415	0.765	0.985	1.015	1.36
EI3	Ei	1.145	1.37	2.435	0.86	0.825	0.77
EI4	Ei	0.41	0.125	0.37	0.85	0.39	0.235
EI5	Ei	0.655	0.295	0.435	0.41	1.045	0.68
EI6	Ei	0.41	0.235	0.88	0.275	0.515	0.95
EI7	Ei	1.14	0.135	0.92	1.5	1.385	1.42
EI8	Ei	0.27	0.091	0.895	0.35	0.071	1.14
EI9	Ei	0.465	0.285	0	0.1845	0.47	0.69
HC1	HC	0.76	0.415	1.395	1.385	0.39	0.3
HC10	HC	0.65	0.23	0.73	2.115	0.77	0.113
HC11	HC	0.84	0.2	3.91	0.3795	0.66	2.425
HC12	HC	0.705	0.815	0.42	0.18	0.81	1.835
HC14	HC	0.29	0.225	0.38	0.275	0.135	1.04
HC15	HC	0.205	0.0605	0.905	0.24	0.091	0
HC16	HC	2.7	0.125	0.345	1.195	3.91	4.175
HC17	HC	0.43	0.0805	1.555	0.66	0.55	0.215
HC18	HC	0.14	0.0915	0.225	0.125	0.1025	0.23
HC19	HC	1.255	0.33	2.735	1.135	0.885	0.64
HC2	HC	0.46	0.12	0.845	1.205	0.255	0.2
HC20	HC	0.395	0.88	1.58	0.1315	0.07	0.07
HC24	HC	0.22	0.0785	0.41	0.21	0	0
HC3	HC	0.33	0.43	0.21	0.25	0.27	0.69
HC4	HC	0.58	0.24	0.585	1.15	0.5	0.705
HC5	HC	0.125	0.0535	0.42	0.35	0.105	0.075
HC6	HC	0.31	0.098	0.545	0.64	0.355	0.3
HC7	HC	0.185	0.175	0.42	0.17	0.08	0.21
HC8	HC	0.555	0.0425	1.84	0.725	0.345	0.195
HC9	HC	0.96	0.49	1.515	0.51	0.265	0.625
S1	S1	1.465	0.395	1.815	2.93	2.31	3.335
S10	S1	0.0925	0.025	0.1	0.055	0.145	0.165
S12	S1	3.25	1.43	3.175	4.53	3.86	2.91
S13	S1	0.26	0.165	0.6	0.22	0.17	0.57
S16	S1	0.24	0.165	0.042	0.18	0.545	0.105
S19	S1	0.88	0	0.475	0.745	1.075	2.575
S2	S1	0.575	0.18	2.29	0.945	0.75	1.98
S20	S1	0.28	0.22	0.505	0.43	0.22	0.225
S21	S1	0.655	0.45	0.24	0.915	0.265	0.765
S22	S1	0.42	0.26	1.59	0.885	0.14	0.225
S23	S1	0.5	0	4	1.47	0.415	0.415
S24	S1	1.025	0.195	0.325	1.165	1.6	1.555
S3	S1	1.235	0.575	1.05	1.265	1.235	1.615
S5	S1	0.67	0.22	1.375	0.395	1.865	5.545
S6	S1	1.055	0.108	0.825	1.27	0.855	3.125
S7	S1	1.415	0.137	2.705	1.155	1.88	2.14
S8	S1	0.93	0.685	1.16	1.63	0.525	1.93
S9	S1	0.465	0.22	0.37	0.21	0.885	0.99
S1	S2	1.445	0.505	1.82	2.39	2.155	1.95
S10	S2	0.485	0.262	0.465	0.435	0.66	0.45
S11	S2	0.57	0.2	1.21	1.125	0.13	0.71
S12	S2	1.735	1.355	3.2	2.42	0.64	0.3
S13	S2	0.1215	0.126	0.31	0.09	0.055	0.175
S14	S2	2.29	2.735	3.145	2.575	2.455	1.12
S16	S2	0.135	0.605	0.115	0.06	0.123	0
S19	S2	0.555	0.265	1.02	0.5	0.27	0.7
S2	S2	0.445	0.106	2.105	1.11	0.35	0.885
S20	S2	0.535	0.28	1.095	0.985	0.165	0.158
S21	S2	0.685	0.1375	0.765	0.445	0.435	2.99
S22	S2	0.51	0.15	1.835	0.835	0.084	0.1355
S23	S2	0.955	0.515	3.66	2.305	0.148	0.43
S24	S2	0.4	0.3	0.62	0.92	0.215	0.44
S3	S2	1.62	0.375	1.165	2	0.895	2.385
S4	S2	0.10475	0.15575	0.35	0.1575	0.004	0.03975
S5	S2	0.4675	0.1675	1.48	2.1125	1.1275	1.97
S6	S2	0.73	0.245	1.415	1.255	0.895	3.195
S7	S2	1.0725	0.19475	1.7275	1.135	1.1625	1.375
S8	S2	1.115	0.54	0.995	1.41	0.405	2.46
S9	S2	0.425	0.57	0.36	0.26	0.49	0.665

## Sheet: % CD39
Patients	Group	CD8_CD39	Naive_CD39	CM_CD39	TM_CD39	EM_CD39	Eff_CD39
EI1	Ei	1.175	0.705	2.175	0.285	0.47	0.68
EI10	Ei	1.09	0.47	1.93	1.38	1.42	1.105
EI11	Ei	NA	NA	NA	NA	NA	NA
EI13	Ei	NA	NA	NA	NA	NA	NA
EI16	Ei	0.475	0.3	0.91	0.84	0.17	0.094
EI17	Ei	0.67	0.275	1.48	1.36	0.34	0.058
EI18	Ei	0.35	0.125	0.86	0.56	0.48	0.085
EI19	Ei	0.06	0.0975	0.0375	0.0635	0	0.015
EI2	Ei	2.225	0.26	5.875	8.285	3.02	1.23
EI20	Ei	1.645	0.78	2.125	3.325	1.42	0.17
EI21	Ei	2.73	0.38	6.635	5.065	1.655	0.845
EI22	Ei	1.245	0.21	3.35	4.39	0.83	0.36
EI23	Ei	0.81	0.61	4.345	1.785	0.101	0.0285
EI24	Ei	0.485	0.18	0.855	0.93	0.415	0.175
EI3	Ei	2.725	0.46	7.68	3.815	1.505	0.58
EI4	Ei	1.5	0.595	1.815	3.205	1.275	0.7
EI5	Ei	0.755	0.64	1.945	0.92	0.61	0.295
EI6	Ei	0.285	0.455	0.985	0.0505	0.27	0.065
EI7	Ei	2.215	0.495	2.8	2.97	1.81	3.62
EI8	Ei	1.43	0.76	5.81	6.015	0.7	1.035
EI9	Ei	0.31	0.125	1.035	0.485	0.25	0.155
HC1	HC	0.195	0.16	0.365	0.0535	0.11	0.26
HC10	HC	0.415	0.165	0.69	0.845	0.79	0.084
HC11	HC	2.17	1.065	9.24	0.725	1.915	4.065
HC12	HC	0.77	2.205	2.47	0.49	0.28	0.155
HC14	HC	1.82	0.35	11.6	1.665	0.66	0.32
HC15	HC	0.185	0.17	0.375	0.0495	0.0775	0.165
HC16	HC	0.605	0.41	2.305	0.905	0.385	0.13
HC17	HC	0.25	0.405	0.16	0	0	0.215
HC18	HC	0.12	0.145	0.165	0.114	0.0435	0.0275
HC19	HC	1.665	0.5	0.4	0.68	6.285	3.09
HC2	HC	0.605	0.33	1.325	0.865	0.345	0.2
HC20	HC	0.615	0.35	3.37	0.53	0.38	0.099
HC24	HC	0.43	0.1105	0.49	0.42	1.33	0.58
HC3	HC	0.32	0.18	0.335	0.56	0.2225	0.27
HC4	HC	0.15	0.195	0.19	0.08	0.068	0.06
HC5	HC	0.59	0.355	2.245	1.145	0.57	0.155
HC6	HC	0.66	0.42	1.165	0.635	0.73	0.815
HC7	HC	0.485	1.55	1.625	0.46	0.45	0.14
HC8	HC	0.465	0.31	1.11	0.245	0.945	0
HC9	HC	0.77	0.48	0.83	0.065	0.165	0.23
S1	S1	0.605	0.355	1.26	0.575	0.81	0.4
S10	S1	1.205	0.97	5.875	1.52	0.365	0.125
S12	S1	0.295	0.23	0.845	0.32	0.185	0.1075
S13	S1	0.145	0.066	0.132	0.1425	0.185	0.0375
S16	S1	0.175	0.195	0.1325	0.265	0.0545	0.15
S19	S1	0.265	0.54	0	0	0.32	0.47
S2	S1	1.375	0.535	4.655	2.07	3.11	1.805
S20	S1	0.25	0.19	0.58	0.29	0.225	0
S21	S1	0.067	0.029	0	0.11	0	0.072
S22	S1	0.08	0.265	0.12	0.033	0.0065	0.0175
S23	S1	0.8	0.78	0	1.47	0.205	0.655
S24	S1	0.2	0.1125	1.505	0.63	0.12	0
S3	S1	1.04	0.325	4.005	3.83	1.585	0.51
S5	S1	0.355	0.36	0.905	0.052	0.18	0.07
S6	S1	0.405	0.136	1.605	0.675	0.295	0.2975
S7	S1	0.92	0.535	1.275	1.325	0.915	0.755
S8	S1	0.47	0.32	1.63	2.085	0.215	0.29
S9	S1	0.85	0.555	1.075	0.795	0.91	0.54
S1	S2	1.14	0.61	2.285	1.425	1.555	0.7
S10	S2	2.475	0.77	7.19	2.965	3.51	1.295
S11	S2	0.285	0.42	0.2105	0.0265	0.295	0.165
S12	S2	0.975	0.365	2.655	0.56	0.23	0.19
S13	S2	0.55	0.29	0.0445	0.0445	1.195	0.26
S14	S2	0.675	0.2	1.2	0.47	1.66	0.165
S16	S2	0.195	0.325	0.14	0.121	0.165	0.47
S19	S2	0.275	0.21	0.32	0.12	0.8	0.06
S2	S2	1.105	0.37	3.56	1.485	3.37	3.165
S20	S2	0.4	0.083	0.75	0.825	0.49	0.04
S21	S2	0.15	0.0365	0.465	0.425	0.072	0.076
S22	S2	0.071	0.17	0.0825	0.046	0.0275	0.0455
S23	S2	0.75	0.785	1.65	0.625	0.42	0.135
S24	S2	0.35	0.19	1.305	0.955	0.245	0.245
S3	S2	1.01	0.34	2.665	4.515	1.55	0.47
S4	S2	0.3075	0.46725	0.7325	0.19875	0.12925	0.03975
S5	S2	0.2125	0.175	0.2425	0.136	0.05425	0.168
S6	S2	0.52	0.33	0.685	0.65	0.63	0.235
S7	S2	1.2325	0.7425	1.55	0.9725	0.99	0.455
S8	S2	0.545	0.375	1.125	1.71	0.305	0.26
S9	S2	1.395	1.63	1.28	1.105	1.355	0.835
