# Supplementary material for: Selective loss of CD107a TIGIT+ memory HIV-1-specific CD8+ T cells in PLWH over a decade of ART
Source: eLife. 2023 Sep 19;12:e83737. doi: 10.7554/eLife.83737 (PMC10508883; doi:10.7554/eLife.83737)
Supplement: Figure 1—source data 5. [file elife-83737-fig1-data5.xlsx]

## Sheet: CD8 total Correlograms
Patients	Group	CD4	total CD8+ single TIGIT+	total CD8+ TIGIT+ TIM-3+	O COMBO	1 COMBO	2 COMBO	3 COMBO	4 COMBO	5 COMBO	>1 COMBO
EI1	Ei	538	40.25	1.76	43.15	42.9535	13.2204	0.62147	0.05161	0.0085	56.8555
EI10	Ei	539	14.35	0.0565	48.45	20.3555	21.2607	9.54343	0.32796	0.0135	51.5011
EI11	Ei	778	NA	NA	NA	NA	NA	NA	NA	NA	NA
EI13	Ei	647	NA	NA	NA	NA	NA	NA	NA	NA	NA
EI16	Ei	749	34.05	0.105	49.5	39.2025	10.4298	0.778985	0.063565	0	50.4749
EI17	Ei	635	40.8	0.26	36.1	44.975	17.841	0.960335	0.09417	0.004515	63.875
EI18	Ei	643	15.2	0.335	52.85	20.3015	25.393	1.38846	0.06146	0.006	47.1504
EI19	Ei	785	25.45	0.98	59.95	28.6049	10.9453	0.44392	0.014005	0	40.0082
EI2	Ei	600	23.75	0.31	57.45	26.043	12.9708	2.89073	0.54505	0.049	42.4986
EI20	Ei	517	39.15	0.4	33.05	44.4985	19.5793	2.59871	0.298275	0.0245	66.9993
EI21	Ei	704	32.9	0.49	40.25	36.1715	20.4016	2.69769	0.445605	0.049	59.7654
EI22	Ei	640	36.95	0.85	44.85	39.44	13.5898	1.84675	0.229405	0.048	55.154
EI23	Ei	625	32.8	0.1095	39.25	40.9825	19.0699	0.66868	0.02258	0.00104	60.7447
EI24	Ei	801	26.55	0.35	51.2	29.7025	18.2385	0.829725	0.069725	0.001695	48.8421
EI3	Ei	556	27.3	0.22	33.4	31.296	31.2704	3.48092	0.50933	0.0455	66.6022
EI4	Ei	560	33.3	0.055	42.45	40.091	16.245	0.99334	0.14086	0.024	57.4942
EI5	Ei	549	14.1	0.0815	52.7	25.3025	18.5945	3.12193	0.23037	0.0255	47.2748
EI6	Ei	766	21.05	0.1025	29.6	26.7505	32.6171	10.8729	0.11966	0.002075	70.3622
EI7	Ei	573	34.9	0.37	49.1	41.08	8.7	0.9965	0.1075	0.007	50.891
EI8	Ei	607	11.6	0.035	66	20.485	10.9286	2.1685	0.38323	0.0065	33.9719
EI9	Ei	608	27.25	0.078	22.7	32.926	32.364	11.79	0.293	0.0105	77.3835
S1	S1	990	21.7	0.725	61	24.7595	12.5878	1.608	0.08029	0.00283	39.0384
S10	S1	466	21.6	0.021	55.6	29.097	14.0985	1.0185	0.187	0	44.401
S12	S1	1041	30.8	0.19	41.25	37.46	18.6765	2.4815	0.084	0.005685	58.7077
S13	S1	1309	24.5	0.0885	61	28.2615	9.92943	0.768455	0.004435	0	38.9638
S16	S1	546	45.55	0.17	31.85	47.8765	19.9332	0.322225	0.01812	0	68.1501
S19	S1	573	33.15	0	52.2	35.728	11.048	0.845	0.167	0	47.788
S2	S1	NA	9.525	0.16	72.8	15.0345	11.155	0.87846	0.138475	0.018	27.2245
S20	S1	286	24.5	0.0885	61	28.2615	9.92943	0.768455	0.004435	0	38.9638
S21	S1	430	23.1	0.19	53.4	32.2395	13.8895	0.546	0	0	46.675
S22	S1	464	45.55	0.17	31.85	47.8765	19.9332	0.322225	0.01812	0.00103	68.1512
S23	S1	1163	33.15	0	52.2	35.728	11.048	0.845	0.167	0	47.788
S24	S1	1004	34.9	0.695	50.7	37.337	11.7245	0.2265	0	0	49.288
S3	S1	496	26.3	0.205	45.6	30.025	21.2492	2.86446	0.244715	0.0175	54.4009
S5	S1	865	11.05	0.245	74.8	12.8345	10.7833	1.52879	0.0535	0.00562	25.2057
S6	S1	403	22.15	0.24	47.8	26.4375	20.182	5.225	0.3605	0	52.205
S7	S1	528	32.95	0.605	46.65	37.345	13.972	1.91	0.097705	0.0095	53.3342
S8	S1	546	30.3	0.185	23.9	37.958	33.6761	4.24463	0.15107	0.01191	76.0417
S9	S1	668	26.5	0.19	48.6	32.5035	17.1643	1.63104	0.069695	0.00103	51.3696
S1	S2	906	25.75	0.565	53.5	29.055	15.4015	1.91572	0.131465	0.011285	46.515
S10	S2	766	31.85	0.0955	47.15	38.855	12.258	1.5765	0.1415	0.012	52.843
S11	S2	1213	24.05	0.175	58.4	28.555	11.6485	1.40503	0.033515	0.004015	41.6461
S12	S2	1119	31.6	0.25	51.25	40.9435	7.20502	0.46818	0.13032	0.018	48.765
S13	S2	NA	21.05	0.0485	57.15	30.349	12.372	0.0995	0.008	0	42.8285
S14	S2	NA	47.4	0.915	39.2	51.115	9.23233	0.42562	0.04104	0.003415	60.8174
S16	S2	976	17.65	0.0335	57.45	27.7475	13.082	1.7255	0.009	0	42.564
S19	S2	898	37.05	0.26	51.15	38.2785	10.3556	0.218465	0.021315	0.007115	48.881
S2	S2	1001	5.91	0.0865	78.4	11.555	9.42772	0.54481	0.037215	0.005635	21.5704
S20	S2	832	21.35	0.145	62.15	24.5345	12.8091	0.486955	0.026045	0.003485	37.8601
S21	S2	NA	12.45	0.375	71.45	19.2445	8.85605	0.41457	0.01836	0.0011	28.5346
S22	S2	581	46.4	0.18	30.4	49.1295	20.1382	0.270035	0.013795	0.002055	69.5536
S23	S2	1840	44.85	0.32	42.55	47.87	8.829	0.68955	0.105775	0.00693	57.5013
S24	S2	1215	22.25	0.1015	66.85	24.5785	8.39458	0.16719	0.006845	0.00119	33.1483
S3	S2	1130	26.4	0.215	34.3	28.445	34.0951	2.95175	0.202387	0.0155	65.7097
S4	S2	817	33.45	0.024	53.25	35.8635	10.3011	0.567955	0.02917	0.00267	46.7644
S5	S2	945	8.08	0.245	86.7	9.229	3.80959	0.26894	0.01216	0	13.3197
S6	S2	794	20.6	0.335	69.1	21.8125	8.49167	0.543085	0.05996	0.00855	30.9158
S7	S2	635	34.3	0.425	43.1	39.128	15.524	2.13699	0.161	0.0125	56.9625
S8	S2	642	41.5	0.21	28.2	43.9605	25.7075	2.07156	0.11927	0.00477	71.8636
S9	S2	826	25	0.125	46.25	32.985	18.884	1.7536	0.086435	0.00173	53.7107

## Sheet: Naive Correlograms
Patients	Group	CD4	Naive single TIGIT+	Naive TIGIT+TIM-3+	O COMBO	1 COMBO	2 COMBO	3 COMBO	4 COMBO	5 COMBO	>1 COMBO
EI1	Ei	538	5.8	0.375	91.15	7.495	1.214	0.082	0	0.03	8.821
EI10	Ei	539	1.58	0.0225	94.75	4.4345	0.6555	0.1515	0.0105	0	5.252
EI11	Ei	778	NA	NA	NA	NA	NA	NA	NA	NA	NA
EI13	Ei	647	NA	NA	NA	NA	NA	NA	NA	NA	NA
EI16	Ei	749	5.15	0.058	92.55	6.2175	1.095	0.113	0.019	0	7.4445
EI17	Ei	635	5.785	0.093	91.9	6.579	1.267	0.1835	0.0255	0.0255	8.0805
EI18	Ei	643	0.435	0.0685	98.6	1.0555	0.2595	0.028	0.0205	0	1.3635
EI19	Ei	785	4.15	0.61	93.55	5.2455	1.129	0.08241	0	0	6.45691
EI2	Ei	600	3.2	0.215	93.75	5.2305	0.78839	0.19974	0.039725	0	6.25835
EI20	Ei	517	11.75	0.2	84.35	12.4185	2.819	0.3295	0.0975	0	15.6645
EI21	Ei	704	3.525	0.0965	94.95	3.9335	0.9275	0.165	0.0135	0.0135	5.053
EI22	Ei	640	3.465	0.1445	94.95	4.2335	0.654	0.134	0.023	0.0125	5.057
EI23	Ei	625	5.705	0.0745	92.15	6.529	1.1095	0.2055	0	0	7.844
EI24	Ei	801	2.21	0.0905	96.9	2.6595	0.3635	0.0545	0.009	0	3.0865
EI3	Ei	556	4.155	0.23	92.7	5.7415	1.222	0.1945	0.107	0.0065	7.2715
EI4	Ei	560	0.74	0.018	97.85	1.531	0.4535	0.154	0.009	0	2.1475
EI5	Ei	549	1.535	0.0595	95.05	3.7235	0.8835	0.164	0.0975	0.0885	4.957
EI6	Ei	766	4.53	0.098	91.2	5.537	2.4645	0.7245	0.0835	0	8.8095
EI7	Ei	573	1.9	0.065	96.8	2.82	0.235	0.15	0	0	3.205
EI8	Ei	607	1.5	0.0075	94.75	4.126	0.8285	0.207	0.052	0	5.2135
EI9	Ei	608	2.535	0	88.7	9.57	1.395	0.225	0.075	0	11.265
S1	S1	990	5.855	0.0995	91.95	6.9925	0.892	0.149	0.0195	0	8.053
S10	S1	466	2.735	0	94.5	3.96	0.98	0.5	0.065	0	5.505
S12	S1	1041	4.38	0.205	93.2	5.998	0.65867	0.08301	0.03235	0.00717	6.7792
S13	S1	1309	7.085	0.0875	91.65	7.5715	0.693	0.049	0.0065	0	8.32
S16	S1	546	1.84	0.0275	90.35	8.99	0.5325	0.195	0	0	9.7175
S19	S1	573	8.315	0	83.3	14.555	1.78	0.355	0	0	16.69
S2	S1	NA	1.015	0.038	97.2	1.9515	0.60671	0.219935	0.023105	0.006	2.80725
S20	S1	286	1.27	0.0495	97.45	2.0025	0.4915	0.077	0	0	2.571
S21	S1	430	5.575	0.114	92.2	6.394	1.326	0.085	0	0	7.805
S22	S1	464	5.81	0.05	92.45	6.4295	0.98	0.0885	0.043	0.0075	7.5485
S23	S1	1163	1.56	0	95.3	3.26	0.915	0.43	0.115	0	4.72
S24	S1	1004	0.945	0.044	98.3	1.2885	0.389	0.037	0	0	1.7145
S3	S1	496	6.105	0.103	89.7	8.351	1.5995	0.323	0.0075	0.0075	10.2885
S5	S1	865	1.565	0.024	96.65	2.7285	0.45931	0.15489	0.012115	0.004115	3.35893
S6	S1	403	3.765	0.0525	92.55	6.495	0.8395	0.1285	0.016	0	7.479
S7	S1	528	8.495	0.0605	89.9	9.116	0.709	0.2475	0	0	10.0725
S8	S1	546	3.67	0.129	91.65	6.9475	1.1175	0.2215	0.046	0	8.3325
S9	S1	668	7.91	0.037	87.2	10.6755	1.938	0.1845	0.0475	0	12.8455
S1	S2	906	6.06	0.14	91.1	7.515	1.0395	0.31039	0.05028	0.0145	8.92967
S10	S2	766	3.735	0.032	94.4	4.857	0.65	0.124	0	0	5.631
S11	S2	1213	3.96	0.0715	91	7.8085	0.9145	0.2485	0.016	0.008	8.9955
S12	S2	1119	4.575	0.1545	93.1	6.1895	0.56196	0.10142	0.04496	0.007	6.90484
S13	S2	NA	4.365	0	94.1	5.031	0.711	0.167	0	0	5.909
S14	S2	NA	6.19	0.31	89.55	9.1695	1.1435	0.0785	0.052	0	10.4435
S16	S2	976	1.43	0	92.05	6.33	1.43	0.215	0	0	7.975
S19	S2	898	6.255	0.091	91.95	7.0205	0.904	0.0765	0.0075	0	8.0085
S2	S2	1001	0.68	0.0185	98.2	1.358	0.348985	0.105185	0.00658	0.00105	1.8198
S20	S2	832	0.955	0.025	98.35	1.4375	0.176845	0.02429	0.011455	0	1.65009
S21	S2	NA	4.3	0.015965	94.6	4.624	0.74886	0.015965	0	0	5.38882
S22	S2	581	3.83	0.05	94.95	4.2485	0.747035	0.04657	0.004535	0.004535	5.05117
S23	S2	1840	3.785	0.145	93.1	5.305	1.2675	0.275	0.0595	0	6.907
S24	S2	1215	1.01	0.034	98.15	1.5155	0.29281	0.046435	0.001325	0.001325	1.8574
S3	S2	1130	3.74	0.039	93.2	5.425	1.13833	0.2395	0.031175	0.00516	6.83916
S4	S2	817	1.215	0	97.65	1.9625	0.349	0.022	0	0	2.3335
S5	S2	945	0.92	0.0305	98.15	1.5245	0.24546	0.059705	0.003525	0	1.83319
S6	S2	794	9.71	0.0845	88.25	10.2175	1.33714	0.163145	0.025735	0.003135	11.7467
S7	S2	635	10.04	0.0785	86.6	11.5115	1.5735	0.272	0.0225	0	13.3795
S8	S2	642	2.42	0.06	95	3.97	0.816275	0.180585	0.016275	0	4.98313
S9	S2	826	11.4	0.155	76.95	18.005	4.1865	0.731	0.0515	0	22.974

## Sheet: CM Correlograms
Patients	Group	CD4	CM single TIGIT+	CM TIGIT+ TIM-3+	O COMBO	1 COMBO	2 COMBO	3 COMBO	4 COMBO	5 COMBO	>1 COMBO
EI1	Ei	538	37.25	0.86	51.2	38.775	9.1005	0.7645	0.1055	0.0405	0.7645
EI10	Ei	539	17.2	0.455	46.6	29.105	17.03	6.47	0.73	0.09	6.47
EI11	Ei	778	NA	NA	NA	NA	NA	NA	NA	NA	NA
EI13	Ei	647	NA	NA	NA	NA	NA	NA	NA	NA	NA
EI16	Ei	749	38.2	0.225	49.05	40.173	9.435	1.172	0.135	0	1.172
EI17	Ei	635	29.6	0.0555	56.65	31.975	9.97	1.2005	0.1515	0.024	1.2005
EI18	Ei	643	17.25	0.4	64.2	20.295	13.985	1.435	0.11	0	1.435
EI19	Ei	785	27.15	2.18	56.6	30.655	12.2762	0.45584	0.01417	0	0.45584
EI2	Ei	600	40.3	0.47	31.55	42.614	18.459	6.059	1.248	0.045	6.059
EI20	Ei	517	28.55	0.265	49.5	29.7425	17.5435	2.8095	0.328	0.066	2.8095
EI21	Ei	704	33.85	0.48	32.9	37.1	24.421	4.9805	0.605	0.0455	4.9805
EI22	Ei	640	38.4	2.135	34.3	40.295	20.95	3.66	0.745	0.05	3.66
EI23	Ei	625	35.8	0.1	46.05	37.845	13.43	2.465	0.155	0	2.465
EI24	Ei	801	23.15	0.22	65.8	24.67	8.86	0.49	0.19	0	0.49
EI3	Ei	556	31.3	0.865	32.2	34.174	25.2695	6.479	1.7245	0.114	6.479
EI4	Ei	560	20.9	0.0685	68.05	23.5	7.25	1.0685	0.14	0	1.0685
EI5	Ei	549	13.9	0	61.3	20.717	13.927	3.202	0.851	0	3.202
EI6	Ei	766	21	0.26	46.75	23.524	20.954	8.236	0.554	0.027	8.236
EI7	Ei	573	30.2	0.33	59.8	33.25	5.601	0.98	0.35	0	0.98
EI8	Ei	607	23.65	0.21	49.4	31.045	14.465	4.185	0.93	0	4.185
EI9	Ei	608	17.9	0	54.85	30.6	10.47	3.47	0.61	0	3.47
S1	S1	990	31.7	0.74	43.05	38.755	16.185	1.86	0.1475	0	1.86
S10	S1	466	27.55	0.455	44.35	32.475	18.02	3.615	1.515	0	3.615
S12	S1	1041	32.3	0.84	57.8	35.7095	5.6235	0.626	0.2075	0.013	0.626
S13	S1	1309	39.9	0.26	41.8	42.385	15.4665	0.2455	0.016	0	0.2455
S16	S1	546	17.65	0	52.65	31.875	13.4495	2.0515	0	0	2.0515
S19	S1	573	27.8	0.24	45.05	31.01	19.975	3.945	0	0	3.945
S2	S1	NA	25.8	0.65	48.65	29.83	18.289	2.702	0.465	0.05	2.702
S20	S1	286	40.9	0.14	40.75	42.46	15.4895	1.2345	0.06	0	1.2345
S21	S1	430	27.55	0	42.15	31.72	26.165	0	0	0	0
S22	S1	464	39.8	0.59	39.75	42.235	17.5755	0.4005	0.081	0	0.4005
S23	S1	1163	18.35	0	58.75	24.35	14.875	2	0	0	2
S24	S1	1004	25.5	0	65.35	27.225	6.715	0.7	0	0	0.7
S3	S1	496	36.45	0.405	32.85	40.33	21.636	4.42	0.645	0.06	4.42
S5	S1	865	24.2	0.28	59	29.345	9.985	1.105	0.64	0	1.105
S6	S1	403	31.25	0.32	38.85	34.315	20.465	5.755	0.61	0	5.755
S7	S1	528	32.85	0.835	40.1	39.28	17.7805	2.632	0.1785	0	2.632
S8	S1	546	27.05	0.265	39.25	33.2955	21.3065	5.6795	0.448	0	5.6795
S9	S1	668	20.95	0.075	62.85	24.64	11.6089	0.85559	0.06309	0	0.85559
S1	S2	906	42	0.92	37.55	44.26	15.9955	1.963	0.2265	0	1.963
S10	S2	766	28.7	0	45.45	32.765	17.42	3.515	0.87	0	3.515
S11	S2	1213	39.15	0.51	39.35	45.63	13.5155	1.441	0.0955	0	1.441
S12	S2	1119	28.05	0.52	62.15	30.777	5.108	1.2465	0.609	0.096	1.2465
S13	S2	NA	28.45	0.135	52.55	33.06	14.355	0.089	0	0	0.089
S14	S2	NA	34.25	1.23	49.65	37.5315	11.948	0.7615	0.1115	0	0.7615
S16	S2	976	15.85	0.056	69	23.993	6.545	0.444	0.029	0	0.444
S19	S2	898	33.3	0.405	57.25	34.4745	8.032	0.1475	0.065	0.0275	0.1475
S2	S2	1001	24.15	0.65	49.95	29.455	18.4845	1.863	0.2165	0.0195	1.863
S20	S2	832	36.2	0.46	43.4	38.986	16.7751	0.771	0.06121	0.004355	0.771
S21	S2	NA	30.5	0.305	41.5	34.0965	23.883	0.464	0	0	0.464
S22	S2	581	40.05	0.735	38	42.66	18.7365	0.5745	0.0335	0.006	0.5745
S23	S2	1840	28.5	0.94	49.4	34.505	13.93	1.8	0.22	0.145	1.8
S24	S2	1215	25.55	0.285	66.45	26.713	6.2545	0.524	0.0665	0	0.524
S3	S2	1130	39.35	0.48	35.15	42.5375	18.9215	3.1395	0.299	0.0175	3.1395
S4	S2	817	32.3	0.155	42.95	35.645	19.932	1.337	0.152	0	1.337
S5	S2	945	17.85	1.135	73.3	19.535	6.6165	0.5395	0.037	0	0.5395
S6	S2	794	41.8	0.805	38.1	43.0595	17.87	0.8635	0.107	0.05	0.8635
S7	S2	635	33.25	0.625	30.6	39.791	26.1695	2.918	0.397	0.037	2.918
S8	S2	642	32.55	0.335	42.75	35.924	19.0105	2.0615	0.297	0	2.0615
S9	S2	826	17.95	0.108	61	24.4495	13.331	1.03997	0.11321	0	1.03997

## Sheet: TM Correlograms
Patients	Group	CD4	TM single TIGIT+	TM TIGIT+TIM-3+	O COMBO	1 COMBO	2 COMBO	3 COMBO	4 COMBO	5 COMBO	>1 COMBO
EI1	Ei	538	38.85	1.035	27.45	43.3465	28.548	0.6555	0.047	0	72.597
EI10	Ei	539	6.665	0.0555	15.7	16.832	37.951	28.644	0.8385	0.038	84.3035
EI11	Ei	778	NA	NA	NA	NA	NA	NA	NA	NA	NA
EI13	Ei	647	NA	NA	NA	NA	NA	NA	NA	NA	NA
EI16	Ei	749	42.6	0.13	21.8	49.1845	26.7465	2.101	0.1215	0	78.1535
EI17	Ei	635	35.8	0.127	21.6	40.995	35.489	1.758	0.19	0	78.432
EI18	Ei	643	12.95	0.235	6.645	22.486	67.616	3.1585	0.0675	0.014	93.342
EI19	Ei	785	26.3	0.88	26	34.295	38.1275	1.506	0.0575	0	73.986
EI2	Ei	600	29.4	0.25	10.35	32.9885	41.6455	12.026	2.626	0.36	89.646
EI20	Ei	517	22.3	0.17	14.65	32.406	45.848	6.446	0.5895	0.045	85.3345
EI21	Ei	704	36.35	0.0965	9.705	41.45	43.1835	4.8255	0.808	0.06	90.327
EI22	Ei	640	30.15	1.255	12.95	34.855	43.31	7.537	1.013	0.259	86.974
EI23	Ei	625	32.5	0.165	18.4	38.552	41.3675	1.599	0.039465	0.002965	81.5609
EI24	Ei	801	21.5	0.235	15.55	26.4705	55.8475	1.9585	0.1235	0	84.4
EI3	Ei	556	27.8	0.0975	8.69	32.813	52.341	5.57007	0.5375	0.0635	91.3251
EI4	Ei	560	23.3	0.061	23.95	32.9105	38.8905	3.5015	0.613	0.108	76.0235
EI5	Ei	549	14.05	0.0355	23.35	28.6005	40.4225	7.263	0.319	0.049	76.654
EI6	Ei	766	15.1	0.0465	17.45	22.0299	43.7765	16.636	0.0855	0	82.5279
EI7	Ei	573	40.4	0.25	31.9	47.395	18.922	1.678	0.104	0.044	68.143
EI8	Ei	607	16.1	0.06	15.5	27.938	38.254	15.342	2.958	0	84.492
EI9	Ei	608	13	0.0245	6.77	15.4675	47.519	29.922	0.345	0.0325	93.286
S1	S1	990	26.7	1.305	25.6	32.2965	37.4955	4.44	0.1475	0	74.3795
S10	S1	466	24.25	0.055	14	39.55	44.53	1.75	0.135	0	85.965
S12	S1	1041	27.35	0.83	39.5	40.204	18.7735	1.4715	0.068	0.008	60.525
S13	S1	1309	23.05	0.0575	23.9	29.445	45.8535	0.7825	0.0575	0	76.1385
S16	S1	546	18.45	0	32.15	30.7575	31.8595	5.1835	0.0875	0	67.888
S19	S1	573	30.05	0	20.5	37.14	37.15	5.09	0.135	0	79.515
S2	S1	NA	13.75	0.1275	31.85	29.68	36.1125	2.0755	0.284	0.0385	68.1905
S20	S1	286	37.85	0.13	22.35	43.501	31.545	2.59	0	0	77.636
S21	S1	430	11.85	0	27.85	29.775	40.225	2.16	0	0	72.16
S22	S1	464	28	0.27	13.1	33.1715	52.995	0.7095	0.0065	0	86.8825
S23	S1	1163	32.8	0	14.41	35.3	45.87	2.94	1.47	0	85.58
S24	S1	1004	24.85	0.425	20.95	29.521	48.776	0.808	0	0	79.105
S3	S1	496	29	0.265	13.55	34.43	43.1105	8.0525	0.8085	0	86.4015
S5	S1	865	21.35	0.1095	10.09	24.306	57.7415	7.8435	0.0275	0	89.9185
S6	S1	403	27.5	0.41	9.055	29.7495	46.3415	14.129	0.6645	0	90.8845
S7	S1	528	30.35	0.385	28.1	40.4545	26.921	4.476	0.085	0	71.9365
S8	S1	546	23.25	0.43	12.6	29.89	43.7065	13.158	0.607	0.015	87.3765
S9	S1	668	19.5	0.0375	30.85	27.9035	37.0855	4.072	0.0995	0.006	69.1665
S1	S2	906	30.35	0.845	17.2	36.248	42.2995	4.1	0.1565	0.014	82.818
S10	S2	766	21.95	0	22.3	39.54	34.035	3.61	0.505	0	77.69
S11	S2	1213	34.8	0.19	30.05	41.485	23.8485	4.5465	0.105	0	69.985
S12	S2	1119	28.2	0.44	50.15	37.0465	12.378	0.3915	0	0	49.816
S13	S2	NA	17.8	0.0445	41.8	29.3545	28.7445	0.0445	0.0445	0	58.188
S14	S2	NA	43.55	1.11	22.6	50.825	25.524	1.015	0.04	0	77.404
S16	S2	976	16.9	0.031	55.1	25.108	17.812	1.936	0	0	44.856
S19	S2	898	42.6	0.26	25.6	44.75	29.2	0.3655	0	0	74.3155
S2	S2	1001	10.65	0.14	35	26.1875	37.4765	1.1995	0.065	0.0205	64.949
S20	S2	832	28.65	0.24	22.65	35.1515	40.6402	1.50183	0.0551	0.015165	77.3638
S21	S2	NA	10.65	0.0685	35.15	31.291	32.287	1.2015	0.014	0	64.7935
S22	S2	581	31.45	0.195	16.2	38.0296	45.3581	0.45914	0.02264	0	83.8694
S23	S2	1840	20.85	0.52	34.1	34.609	29.541	1.666	0.113	0	65.929
S24	S2	1215	25.95	0.155	26.7	30.605	42.0535	0.626	0.01	0.005	73.2995
S3	S2	1130	38.75	0.92	12.5	42.875	36.454	7.399	0.682	0.0215	87.4315
S4	S2	817	46.35	0	18.8	50.435	29.2435	1.482	0	0.016	81.1765
S5	S2	945	20.75	1.35	31.85	26.02	39.675	2.445	0.055	0	68.195
S6	S2	794	27.3	0.32	20.05	33.4315	44.616	1.8405	0.0205	0	79.9085
S7	S2	635	29.95	0.126	19.2	39.6945	35.1185	5.82	0.1375	0.0245	80.795
S8	S2	642	31.75	0.62	12.45	36.557	45.502	5.1255	0.376	0	87.5605
S9	S2	826	18.55	0.0485	35.45	28.709	32.5528	3.1776	0.08105	0.0065	64.5269

## Sheet: EM correlograms
Patients	Group	CD4	EM single TIGIT+	EM TIGIT+TIM-3+	O COMBO	1 COMBO	2 COMBO	3 COMBO	4 COMBO	5 COMBO	>1 COMBO
EI1	Ei	538	60.75	2.08	22.95	63.958	12.624	0.42	0.013	0	77.015
EI10	Ei	539	38.1	0.065	14.9	46.5175	32.073	6.362	0.182	0	85.1345
EI11	Ei	778	NA	NA	NA	NA	NA	NA	NA	NA	NA
EI13	Ei	647	NA	NA	NA	NA	NA	NA	NA	NA	NA
EI16	Ei	749	31.95	0.085	52.7	40.1135	6.80241	0.348375	0.025035	0	47.2893
EI17	Ei	635	46.9	0.18	32.9	53.429	13.1025	0.5715	0.0185	0	67.1215
EI18	Ei	643	26.9	0.51	28.45	37.39	32.436	1.768	0	0	71.594
EI19	Ei	785	34.8	0.22	56.4	38.809	4.5425	0.2655	0	0	43.617
EI2	Ei	600	54.45	0.34	13.3	57.605	24.441	4.1045	0.58	0.037	86.7675
EI20	Ei	517	44.3	0.335	31.05	53.577	13.212	1.8565	0.2695	0	68.915
EI21	Ei	704	34.7	0.555	44.3	39.7665	13.773	1.841	0.231	0.0705	55.682
EI22	Ei	640	49.9	0.73	33.1	52.968	12.6123	1.186	0.072	0.01079	66.8491
EI23	Ei	625	23.5	0.049	57.75	36.3964	5.77616	0.04709	0	0	42.2196
EI24	Ei	801	35.9	0.46	47	40.1635	12.2821	0.528415	0.03702	0.004415	53.0155
EI3	Ei	556	37.8	0.185	24.5	43.995	29.1055	2.1645	0.3155	0	75.5805
EI4	Ei	560	47.65	0.032	16.35	61.827	21.392	0.377	0.006	0	83.602
EI5	Ei	549	15.05	0.1145	50.65	31.3095	15.7065	2.237	0.126	0	49.379
EI6	Ei	766	28.4	0.15	22.35	39.482	30.471	7.7145	0.0075	0	77.675
EI7	Ei	573	39.55	0.5	41	48.86	9.168	0.9465	0	0	58.9745
EI8	Ei	607	9.08	0	67.25	24.9045	6.44	1.2145	0.181	0.0065	32.7465
EI9	Ei	608	25.1	0.14	27.7	34.575	27.397	10.1185	0.226	0.015	72.3315
S1	S1	990	36.15	1.455	34.85	42.8895	19.1065	3.0445	0.09	0	65.1305
S10	S1	466	15.3	0.024	59.95	27.765	11.5515	0.605	0.07	0	39.9915
S12	S1	1041	29.85	0.765	38.4	42.002	17.3666	2.20312	0.0335	0	61.6052
S13	S1	1309	37.75	0.058	35.55	49.062	15.0305	0.3615	0.012	0	64.466
S16	S1	546	13.8	0.083	41.35	34.618	19.4045	4.5895	0.081	0	58.693
S19	S1	573	32.8	0.2	41.35	41.725	15.66	1.16	0	0.115	58.66
S2	S1	NA	23.7	0.245	29.55	40.7455	27.395	1.751	0.455	0.0585	70.405
S20	S1	286	39.15	0.064	39.6	47.363	12.186	0.897	0	0	60.446
S21	S1	430	15.2	0.0365	41.85	37.255	20.5165	0.3815	0	0	58.153
S22	S1	464	46.05	0.0745	32.7	48.9895	18.1016	0.2175	0.00313	0	67.3118
S23	S1	1163	33.05	0	42.4	39.145	17.32	1.175	0	0	57.64
S24	S1	1004	39.3	1.02	43.4	45.666	10.664	0.227	0	0	56.557
S3	S1	496	31.05	0.275	38.5	40.0745	18.5365	2.6845	0.202	0.0275	61.525
S5	S1	865	45.7	1.015	17.25	50.408	29.436	2.808	0	0	82.652
S6	S1	403	28.1	0.15	33.55	36.5435	23.8815	5.795	0.2005	0	66.4205
S7	S1	528	47.75	0.93	27.9	53.03	17.0085	1.9485	0.085	0.0125	72.0845
S8	S1	546	32.8	0.1005	14.75	42.8385	38.335	3.96349	0.05956	0.00728	85.2038
S9	S1	668	36.1	0.53	30.85	49.5885	17.9955	1.556	0.043	0	69.183
S1	S2	906	41.65	1.21	29.15	48.845	19.628	2.2765	0.052	0.0105	70.812
S10	S2	766	13.05	0.1245	47.15	29.559	20.9175	2.241	0.149	0	52.8665
S11	S2	1213	42.05	0.065	27.25	49.665	20.57	2.52	0	0	72.755
S12	S2	1119	39.45	0.1335	35.95	54.433	9.25144	0.300185	0.002685	0	63.9873
S13	S2	NA	22.95	0	53.1	39.159	7.7365	0.054	0	0	46.9495
S14	S2	NA	59.65	1.475	25.5	66.415	7.7325	0.2925	0	0	74.44
S16	S2	976	19.2	0.0395	40.2	37.9525	17.7985	4.07	0	0	59.821
S19	S2	898	68.7	0.23	16.4	70.9295	12.325	0.2985	0	0	83.553
S2	S2	1001	16.15	0.063	31.5	41.053	25.79	1.637	0.033	0.008	68.521
S20	S2	832	47.4	0.084	31.6	55.823	12.3405	0.31602	0	0	68.4795
S21	S2	NA	9.77	0.205	68.8	21.9725	8.80751	0.438755	0.009255	0	31.228
S22	S2	581	51.85	0.0345	23.8	55.4254	20.5873	0.177	0	0	76.1897
S23	S2	1840	60.8	0.065	26.15	64.408	8.835	0.518	0.06	0	73.821
S24	S2	1215	40.5	0.1095	49.05	45.506	5.3647	0.0825	0.006	0	50.9592
S3	S2	1130	36.25	0.16	32.95	41.4225	22.9236	2.492	0.17915	0.00315	67.0205
S4	S2	817	43.4	0	47.6	46.189	5.891	0.301	0	0	52.381
S5	S2	945	53.35	0.78	25.05	57.195	16.952	0.817	0.022	0	74.986
S6	S2	794	39.2	0.4	36.55	43.181	19.226	0.9255	0.0825	0	63.415
S7	S2	635	49.2	0.6	29.95	54.519	13.6284	1.76328	0.1125	0.008	70.0312
S8	S2	642	55.65	0.1035	16.25	59.084	23.0401	1.53489	0.036045	0.005135	83.7001
S9	S2	826	40.6	0.23	29.5	52.1395	16.831	1.472	0.042	0	70.4845

## Sheet: EFF correlograms
Patients	Group	CD4	EFF single TIGIT+	EFF TIGIT+TIM-3+	O COMBO	1 COMBO	2 COMBO	3 COMBO	4 COMBO	5 COMBO	>1 COMBO
EI1	Ei	538	76.3	7.86	6.715	77.075	14.945	1.236	0.0455	0	93.3015
EI10	Ei	539	42.65	0	2.685	43.475	46.635	6.835	0.335	0	97.28
EI11	Ei	778	NA	NA	NA	NA	NA	NA	NA	NA	NA
EI13	Ei	647	NA	NA	NA	NA	NA	NA	NA	NA	NA
EI16	Ei	749	48.85	0.1035	42.45	51.636	5.624	0.3275	0	0	57.5875
EI17	Ei	635	61.2	0.855	25.2	64.557	9.6855	0.536	0.054	0	74.8325
EI18	Ei	643	61.95	1.605	13.25	63.745	20.9225	1.675	0.375	0	86.7175
EI19	Ei	785	67.95	0.285	29.2	68.3555	2.455	0.0395	0	0	70.85
EI2	Ei	600	64.9	0.8	7.455	65.7805	23.808	2.7445	0.172	0.034	92.539
EI20	Ei	517	67.1	0.88	20.55	67.879	10.651	0.872	0.046	0	79.448
EI21	Ei	704	53.05	1.52	34.65	54.0275	8.825	2.118	0.3775	0.014	65.362
EI22	Ei	640	57.3	2.045	27.65	58.534	11.68	1.874	0.283	0	72.371
EI23	Ei	625	80	0.17	13.55	80.618	5.749	0.089	0	0	86.456
EI24	Ei	801	40.05	0.57	49.05	41.648	8.258	0.919	0.1275	0	50.9525
EI3	Ei	556	60.2	0.235	14.5	61.807	21.742	1.797	0.137	0.027	85.51
EI4	Ei	560	86.45	0.13	4.61	87.4755	7.6505	0.2285	0.0175	0	95.372
EI5	Ei	549	26.15	0.1055	48	34.7805	14.836	2.235	0.1705	0	52.022
EI6	Ei	766	56.35	0.275	4.16	58.44	33.1115	4.185	0.1125	0	95.849
EI7	Ei	573	74	1.1	16.6	76.98	5.24	0.905	0.26	0	83.385
EI8	Ei	607	44.8	0.189	10.19	47.0395	40.1645	2.265	0.3445	0	89.8135
EI9	Ei	608	44.15	0.05	8.06	46.655	38.017	6.935	0.324	0	91.931
S1	S1	990	61.6	2.07	16.9	63.295	17.54	2.185	0	0.065	83.085
S10	S1	466	59.25	0.041	23.65	62.981	12.553	0.768	0	0	76.302
S12	S1	1041	56.55	0.97	22.75	61.3575	14.356	1.487	0.0305	0	77.231
S13	S1	1309	58.85	0.1025	21.05	61.7025	15.8575	1.208	0.15	0	78.918
S16	S1	546	40.3	0	22.4	47.26	27.855	2.44	0	0	77.555
S19	S1	573	47.25	0.685	30.7	54.94	12.47	1.54	0.3	0	69.25
S2	S1	NA	54.4	1.18	19.8	59.0455	19.9225	1.245	0	0	80.213
S20	S1	286	63.9	0.225	26.15	65.975	7.525	0.33	0	0	73.83
S21	S1	430	43.6	0.43	48.4	47.1105	4.3205	0.144	0	0	51.575
S22	S1	464	81.7	0.175	6.71	82.3923	10.6193	0.222295	0.004295	0	93.2382
S23	S1	1163	64.95	0	18.25	66.87	14.19	0.525	0.115	0	81.7
S24	S1	1004	86	1.49	8.875	86.0675	4.96	0.135	0	0	91.1625
S3	S1	496	32.55	0.175	31.25	35.0555	30.0468	3.4272	0.26479	0.022	68.8163
S5	S1	865	61.15	2.535	8.61	62.2	24.56	4.225	0.375	0	91.36
S6	S1	403	39.2	0.49	19.95	42.8275	29.9395	6.45	0.887	0	80.104
S7	S1	528	59.6	0.995	10.515	61.265	24.72	3.185	0.3	0.08	89.55
S8	S1	546	39.75	0.375	15.35	43.1885	37.2215	3.92326	0.27805	0.034	84.6453
S9	S1	668	57.2	0.52	19.7	60.882	17.663	1.6625	0.0915	0	80.299
S1	S2	906	40.85	0.71	31.9	42.876	21.459	3.421	0.2605	0.012	68.0285
S10	S2	766	80.8	0.205	8.07	82.4085	8.6015	0.873	0.046	0	91.929
S11	S2	1213	59.7	0.255	6.915	61.09	30.845	1.105	0	0	93.04
S12	S2	1119	67.7	0.105	17.55	77.1595	5.216	0.084	0	0	82.4595
S13	S2	NA	38.15	0.175	46.85	43.36	9.8	0	0	0	53.16
S14	S2	NA	91.1	0.915	4.545	91.3585	3.8565	0.2415	0.0155	0	95.472
S16	S2	976	55.1	0	16.7	57.41	25.93	0	0	0	83.34
S19	S2	898	87.8	0.585	4.14	88.009	7.559	0.264	0	0	95.832
S2	S2	1001	38.95	0.105	29.7	49.58	19.765	0.965	0	0	70.31
S20	S2	832	46.15	0.052	51.3	46.744	1.903	0.044	0	0	48.691
S21	S2	NA	31.6	2.22	59.3	33.9645	5.9125	0.824	0.021	0	40.722
S22	S2	581	84.55	0.0985	4.925	84.8196	10.0955	0.142645	0.007645	0	95.0654
S23	S2	1840	82.15	0.39	10.065	82.359	7.195	0.3695	0.0205	0	89.944
S24	S2	1215	64.2	0.245	30.15	64.7405	4.911	0.1985	0.011	0	69.861
S3	S2	1130	28.85	0.185	13.3	29.8208	52.9995	3.64937	0.21218	0.021	86.7028
S4	S2	817	60.7	0.043	32.95	61.2165	5.4545	0.3115	0.043	0	67.0255
S5	S2	945	70.2	1.88	14.7	71.756	12.765	0.735	0.036	0	85.292
S6	S2	794	61.9	2.195	22.85	62.5215	13.19	1.4305	0.0205	0	77.1625
S7	S2	635	61.7	0.765	13.52	63.9845	19.5515	2.7415	0.1885	0	86.466
S8	S2	642	46.4	0.305	8.52	47.0552	41.0976	3.18407	0.184645	0.007355	91.5288
S9	S2	826	62.7	0.24	14.65	65.653	17.6865	1.9175	0.053	0	85.31
