# Supplementary material for: Selective loss of CD107a TIGIT+ memory HIV-1-specific CD8+ T cells in PLWH over a decade of ART
Source: eLife. 2023 Sep 19;12:e83737. doi: 10.7554/eLife.83737 (PMC10508883; doi:10.7554/eLife.83737)
Supplement: Figure 2—source data 1. [file elife-83737-fig2-data1.xlsx]

## Sheet: Single cell data figure 2
CD45RA,"CD39","LAG3","CCR7","CD27","PD1","TIM3","TIGIT","sample","tSNE_V1","tSNE_V2","louvain"
-11.195966,71.378929,308.952118,93.22905,88.171349,79.241409,96.181526,524.708679,TRUE,1.37878097137125,47.0360804239236,"28"
850.472168,133.254395,298.280762,55.089588,72.683792,6.578414,44.000629,6572.274414,FALSE,-32.359968872374,20.3043942193901,"25"
663.438049,119.127678,262.007843,67.288124,-35.028965,679.42749,33.103756,890.989136,FALSE,-8.90664944667831,10.3610371800356,"20"
2604.01001,47.217155,129.408478,790.999146,1344.837769,87.636436,121.414391,-231.26709,FALSE,21.9765088692234,-15.4696060288069,"12"
11748.791992,78.147995,202.628342,1043.092651,1688.544922,-47.461269,69.233078,532.182129,FALSE,-3.00299615517444,-47.7440972301676,"2"
19095.117188,180.659821,73.15181,2155.398438,1284.77771,10.020835,91.291992,-436.030457,FALSE,-9.41721218256316,-46.2837476696011,"1"
1673.561646,102.981682,204.480621,93.439362,232.011948,75.184029,59.566547,4679.121094,FALSE,-24.8488343146755,19.7071742122382,"36"
10038.142578,165.073364,162.067719,1502.558228,2026.951904,-30.684793,54.061367,256.546204,TRUE,0.168553341264193,-47.8764611953106,"2"
201.984024,88.237854,194.290833,189.667526,472.224884,183.199982,40.893818,1142.947754,FALSE,6.2534383132196,22.9612866863726,"28"
1849.533325,155.731674,206.100418,169.674118,434.97287,191.034439,115.40538,3721.000732,TRUE,-20.1876326460507,18.6571715136858,"36"
643.296387,114.224106,194.553558,155.255768,458.190186,343.756592,61.905743,4668.657715,FALSE,-20.8822832874608,13.8356293144276,"8"
3091.301758,154.659485,253.182388,202.580826,-303.130829,-4.159461,71.893997,3764.338135,FALSE,-25.1197189879959,3.93126508002292,"36"
7358.220215,109.081841,236.040268,1515.487671,1143.201782,26.936445,-5.754056,-47.135265,TRUE,3.80387539106368,-49.5850035409076,"2"
115.693069,42.880901,161.717957,51.94323,474.478851,510.431183,58.526806,68.115677,FALSE,-0.806603040171089,14.3162188739503,"20"
7997.750977,-154.055206,198.430969,1707.837036,1270.281372,64.659584,22.584862,267.92514,FALSE,7.42504674015117,-46.5771074023078,"2"
1944.119385,-92.52597,119.036957,59.821705,10.068558,81.884918,2.652011,2239.17749,FALSE,-13.2259308375314,23.2826206832063,"36"
1980.768799,42.4632,205.506714,8.66019,177.711685,234.048981,-9.60325,2097.578125,FALSE,-13.3491561505608,25.0683022829625,"36"
-34.956146,38.303173,195.425186,81.825493,212.049927,81.793983,59.20126,710.643555,FALSE,7.4292690068618,39.433801040901,"28"
8094.731934,-862.803101,-33.008751,1716.716919,1889.580933,-27.541529,-140.815887,382.396912,FALSE,12.8727019938387,-46.336466615912,"2"
59.983242,-273.683441,154.793915,205.164932,474.609528,149.15657,-78.919334,5435.007324,TRUE,-28.8933521156414,21.3366674829658,"10"
5600.000977,-11.842793,186.366425,1454.728149,1051.240356,0.310934,-0.470568,67.439575,FALSE,34.2861522747291,-31.2344205158088,"2"
1243.160767,41.462276,372.501221,74.203369,-34.945797,37.483006,15.103896,14956.601563,FALSE,-45.4286916062832,-2.43152153533584,"4"
38.711243,8.420614,279.820129,283.098602,1153.7146,1900.825439,-62.514172,30179.541016,FALSE,-49.4130760825941,4.80630540048915,"23"
180.526093,38.040771,260.359833,229.868027,662.22644,226.314682,43.076336,12928.473633,FALSE,-36.6876299486274,-6.21533986483701,"4"
1071.618896,190.842819,247.891479,248.083069,-63.640152,77.497948,-19.284298,2644.436768,FALSE,-15.2282296347639,27.0327354634632,"16"
440.343567,-198.470535,178.185928,521.572754,821.443054,14.674971,31.912113,604.66272,FALSE,16.1880788726419,10.7794000443979,"29"
370.6185,-168.765778,373.277893,100.549141,183.675995,503.78537,47.234779,6897.13623,FALSE,-25.4683010547497,-1.19239613770324,"25"
5056.624023,7539.410156,-55.01392,1460.176025,1383.966431,36.325481,-49.26265,256.082367,FALSE,33.471580031912,-10.1658946178307,"33"
2646.073242,239.84494,290.496979,113.761826,13.77249,-37.450336,68.354607,9278.306641,FALSE,-39.1712650149563,-4.73421445157053,"27"
17.667562,72.911209,212.986786,1516.685303,393.78009,45.13475,5.987917,462.820862,FALSE,21.4432351823833,10.2717266778986,"29"
501.914063,239.454102,204.650467,391.518951,184.622574,447.998474,11.258474,4299.883301,FALSE,-16.9000771417552,11.765972109591,"10"
314.008728,82.204796,287.345123,29.245268,20.865261,510.056946,-29.380249,14480.108398,FALSE,-36.9792142671442,-8.00662762479396,"21"
2569.971924,52.364567,160.205338,9.636328,581.249817,251.66777,-2.804137,4273.001465,FALSE,-23.93190609417,15.1459435622794,"36"
360.575928,113.743401,234.743042,1774.934814,2183.811279,112.534927,82.716248,5891.881836,FALSE,-8.6470428375892,-12.9804446516321,"34"
442.095337,-6.960365,372.003387,65.030296,10.754082,292.047516,5.185967,679.625854,FALSE,8.71679760301106,24.3011350918815,"20"
2068.758301,127.924103,158.145142,27.669483,221.04303,0.166486,7.326514,4669.766602,FALSE,-25.1775924916532,17.5659455683124,"36"
9169.355469,208.533646,271.896637,94.027428,340.76828,74.825241,46.654102,4632.847168,FALSE,-34.9654633519502,-33.2963043968334,"5"
186.055344,135.091187,334.29303,188.382095,544.649353,803.895325,34.384506,6721.295898,FALSE,-20.1590019091554,-10.9730160944559,"26"
185.284164,150.623169,144.671936,166.894638,524.496582,797.589844,85.781174,7704.621094,FALSE,-21.3712733624032,-11.2805428012104,"26"
186.054306,53.705212,156.651566,7.460847,813.220581,516.064758,91.912125,1535.566284,FALSE,-4.50814788708401,7.80772640666473,"8"
2156.989258,166.164566,241.762344,148.851151,-67.126991,80.512199,-15.259858,10523.895508,FALSE,-39.1030647913517,-3.9238001941973,"27"
2174.436279,191.679916,219.265091,87.177063,-68.827255,505.547089,53.872292,-248.381653,FALSE,-9.35047913113366,19.4186070910485,"16"
480.790741,48.180412,273.667114,-27.287279,391.90799,326.131439,0.11948,3454.068604,FALSE,-17.3164355743002,16.3001072181964,"10"
-270.264954,110.701996,150.531754,84.417168,1828.578613,2390.728516,70.300148,2397.555908,FALSE,-20.9038890894657,-43.2516391296972,"18"
265.469635,56.025398,200.372818,37.248821,86.861107,88.226746,23.472965,4725.928711,FALSE,-29.9799947160548,27.9597307247027,"10"
3766.789307,167.491684,223.53569,155.097198,-127.827202,493.511047,-2.765193,2512.920898,FALSE,-25.0882777526807,-0.806488512405504,"36"
8.736788,221.701645,191.731873,1468.564941,675.05481,74.592049,24.285883,7964.135742,TRUE,-10.8149479917746,-9.38481012504813,"25"
-257.298859,134.542252,44.945114,-25.905247,133.88205,75.135391,-19.838783,760.569031,FALSE,9.9731798480241,34.7953054674446,"28"
291.50238,140.776978,-54.165192,-15.818856,298.556091,204.234085,158.31308,353.476593,FALSE,-1.30452378227485,38.9140679655325,"19"
-248.719299,23.322269,108.981476,577.437927,437.189178,72.014366,-46.388683,329.409607,FALSE,20.3014205345557,17.6812941789054,"29"
-118.651237,37.048458,193.615768,1109.35083,1059.917603,972.56366,-40.030964,9801.71875,FALSE,-22.8539237152168,-22.2678281134634,"21"
18112.679688,105.755516,218.851196,1285.083862,1361.773682,-59.121994,-62.781239,510.620392,FALSE,-6.17178963397768,-45.9278532316831,"1"
9197.290039,159.176025,205.855209,1158.41333,1218.46936,48.066055,20.955135,-94.402893,FALSE,1.27674153463139,-49.0545435588958,"2"
417.611938,82.862221,315.278839,2.631407,131.74231,181.02803,87.21891,4932.322266,FALSE,-30.1881084547718,27.3843017526935,"10"
6832.578125,179.455841,139.377182,1885.18103,1911.418091,-64.821304,43.273895,437.392273,FALSE,22.2148715950466,-41.0255807489865,"2"
342.293884,39.912868,300.257355,358.758148,632.542664,-21.133211,13.891,1573.449707,FALSE,8.27693446303411,15.4729085957419,"29"
1486.175537,288.785919,363.444397,139.965775,26.107065,352.284973,43.817356,3207.314697,FALSE,-15.5240305051427,19.0398598256051,"36"
-13.952282,133.941345,213.776794,107.662117,3.424311,40.383484,91.393326,736.931152,FALSE,1.68525114139252,46.4555813435391,"28"
2193.372559,201.5065,266.966156,82.240814,305.574127,169.165817,80.139763,9068.058594,FALSE,-36.281110790133,4.9959062379229,"25"
762.930908,128.698685,365.180664,65.300461,38.126328,94.389969,82.773567,12590.737305,FALSE,-40.4701488429581,-1.37648670825455,"4"
768.254883,67.874817,193.342316,524.710327,374.874725,157.786255,10.954215,1657.260986,FALSE,2.38845631493567,18.4642085096279,"28"
190.139496,140.257339,148.652817,1333.159424,1882.286133,178.031937,79.258217,789.636719,FALSE,7.33490370602567,-4.59608218898039,"17"
54.261276,47.047615,166.271439,313.953705,480.001038,120.318069,62.852673,81.343369,FALSE,16.0519987448235,19.7502855237739,"29"
180.013687,181.658936,149.708664,127.803421,579.495483,1184.128296,93.032043,95.311333,FALSE,-15.3131809071896,-13.3210230404027,"31"
281.72821,170.241196,219.498245,160.67984,366.354462,515.0224,79.08593,180.162247,FALSE,-1.14789240931695,15.1306212194149,"20"
105.874786,41.391403,149.588669,1554.19751,1845.199463,63.863693,21.079048,492.56012,FALSE,13.314674815407,-2.97114450265128,"17"
161.325378,114.984276,237.110321,111.781746,252.130051,158.929733,8.923063,203.986115,FALSE,14.8720441114152,31.290244807204,"29"
8584.729492,83.865883,204.527725,145.43161,-8.451634,572.047974,104.434357,5006.099121,FALSE,-36.6777804620907,-31.2535099237197,"5"
457.040192,207.522354,414.128357,196.328369,-127.558922,-4.719611,3.391169,8412.322266,FALSE,-36.6628351978302,12.7310615807245,"25"
682.548157,139.296295,221.755005,99.324486,20.536909,323.655518,51.117702,260.775604,TRUE,3.25577322786634,21.5759384379572,"20"
11680.370117,160.353577,283.491394,6435.916504,2488.627441,99.031639,46.409393,720.702637,FALSE,-1.19175950723229,-44.3617486422153,"2"
711.833862,223.578903,222.701859,1234.634399,746.606384,188.104904,82.143005,5839.509277,FALSE,-18.9331005545347,-0.167133275087315,"25"
240.326157,126.184448,186.975739,80.713814,302.577576,169.373718,34.38892,238.343811,FALSE,11.4494248586337,32.8839023745412,"28"
337.667023,212.643524,116.527924,64.015472,854.086853,1074.495483,80.305092,441.161774,FALSE,-14.1359248353867,-8.5049855829567,"31"
1579.069824,200.620773,152.958191,1214.405029,1193.403809,336.707123,1.901141,1562.731201,FALSE,8.96748619931414,1.21375976658216,"29"
5768.481934,196.465103,391.111664,99.339569,-8.00277,18.745998,31.510378,5648.481934,FALSE,-38.0938418639942,-24.0213126130111,"38"
1327.734131,126.45015,312.136963,999.833923,1536.534546,164.600174,102.478157,2632.085449,FALSE,3.51612482319321,-2.62191585879984,"29"
895.953674,96.246773,405.25531,125.186668,-12.460826,132.459824,-8.394663,13029.441406,FALSE,-40.4697544179024,-2.88942145359498,"4"
112.313614,147.918777,189.018814,687.540771,1546.72229,110.038216,60.145519,5321.134766,FALSE,-11.5220801516659,-8.04978392304529,"25"
3932.820068,168.764816,225.543594,51.280224,140.063705,129.375793,27.916805,2688.087402,FALSE,-28.7223667088909,-7.99426492211255,"36"
415.756775,101.339165,220.702103,111.655342,26.430292,93.974838,61.525982,6986.403809,FALSE,-36.877889887714,24.0523562093487,"25"
3068.086182,214.194138,390.263947,144.384506,72.324814,72.518433,-39.678913,16333,FALSE,-50.4978921869271,-4.65382238686894,"23"
414.496185,167.628372,291.172974,130.020615,-5.114087,47.824142,30.020485,2262.744873,FALSE,-16.9191945424311,36.3830761115905,"28"
649.632751,104.467354,177.44046,760.366577,952.926575,240.255646,-23.653584,3837.069092,FALSE,-11.3879780381261,3.14130270558906,"8"
1067.27002,33.901546,216.186768,573.504333,1187.90918,427.207855,85.187981,10119.319336,FALSE,-28.1551774335632,-11.6634295597302,"25"
350.993347,112.315239,226.20195,373.002014,632.249695,16.641201,-22.471094,1526.860474,FALSE,10.4728430743423,11.9576551022109,"29"
2376.103027,243.054245,254.503677,54.401245,335.738556,308.586487,-39.116035,450.788544,FALSE,-7.86482816189789,20.9972974306775,"16"
751.721191,93.085892,134.427979,427.925171,972.981445,663.249268,-53.287636,4577.077148,FALSE,-15.6267539552806,-6.32398685864168,"8"
23087.642578,137.227341,314.35379,82.860229,83.418961,-66.206108,91.460052,14541.661133,FALSE,-33.0794432294488,-44.0890111604849,"5"
2774.433838,561.495117,142.382126,1196.519775,2423.68335,-58.30328,-7.041234,617.096985,FALSE,19.8390201210867,-23.3974752870693,"6"
10516.267578,-8.474151,34.248863,1394.893433,1352.345581,7.469246,-61.364628,-242.765823,FALSE,-1.38974520989043,-48.4497460719228,"2"
409.499969,-180.897202,110.067276,110.325035,103.19146,761.653931,-36.244862,3060.848877,FALSE,-13.5750944869519,1.59661623522722,"26"
2372.414551,100.042999,329.008698,80.879295,183.72142,98.932236,42.502766,12109.954102,FALSE,-45.2534413450955,-7.77393862238485,"27"
982.631409,77.356773,253.087753,158.620819,411.174622,169.936142,27.877188,12020.478516,FALSE,-38.1663122518161,-4.58025704248206,"4"
7094.685547,402.806732,231.714294,125.240341,124.871399,34.315208,40.425972,688.243408,FALSE,-30.8626192917888,-30.6234678589969,"38"
598.346497,236.316681,41.801598,173.138504,179.681885,188.870636,54.275375,32.746178,FALSE,6.86445037638214,34.8363326738332,"28"
2028.076416,190.630569,-23.298323,71.224838,37.028721,111.580605,-13.857385,380.44101,FALSE,-3.72974583142792,25.8142419755625,"16"
1506.210693,42.879112,223.841507,60.988934,18.944389,15.337078,-6.449306,10847.980469,FALSE,-37.9065495054285,-0.3809303408299,"27"
10310.033203,154.876312,55.002365,1365.487183,1692.919678,-138.001877,87.085518,-403.612274,TRUE,-0.486742740136429,-48.2791569544108,"2"
-132.600922,82.236328,144.371796,275.350555,64.792824,-3.083721,12.161375,368.991211,FALSE,19.4422827957709,30.9005382428925,"28"
-72.673409,-236.506302,151.131348,269.986816,1346.815063,366.228424,157.654541,1041.234863,FALSE,2.04738798500625,4.19240916003701,"29"
17252.794922,-170.077301,142.958984,832.387146,1281.324707,-15.073837,20.174509,2123.823242,FALSE,-4.89823994457101,-48.0962325315067,"1"
1223.742554,-279.837189,159.928619,33.019573,214.248093,172.321289,-7.090008,136.593262,FALSE,8.50702148060023,29.4925069881767,"16"
-243.02681,-276.575745,170.485229,171.694641,124.292641,122.198402,-10.086975,4494.443848,FALSE,-28.8597926714939,28.3475007908609,"10"
56.942116,-175.424088,236.990646,181.468582,214.476044,374.628754,71.201385,3309.465332,FALSE,-14.1612548918762,12.319553231951,"10"
10960.125,-282.352753,153.426788,5664.899902,1458.643311,138.307755,89.755676,-258.541351,FALSE,-0.561032200014774,-46.1631187010214,"2"
362.589661,-131.130157,185.685364,157.320847,206.415863,137.503113,-7.077541,2283.830811,FALSE,-16.2500904331298,32.3612983418748,"10"
390.016022,-171.577911,158.729736,144.288361,606.258606,874.870911,27.28643,2423.157715,FALSE,-13.4491686948908,-1.95690066220445,"8"
25508.251953,-75.24263,158.107727,5279.030762,1656.265503,-49.865967,37.582165,-620.903503,FALSE,-13.6813902040987,-46.2514739130773,"1"
274.111328,148.514526,212.138046,252.253708,625.791687,237.241135,17.962191,60.677483,FALSE,12.6385473786808,16.6129892018956,"20"
270.546967,89.204041,226.380386,100.810257,117.911797,79.294373,11.678156,7327.886719,FALSE,-36.0831070155911,20.7611031118432,"25"
5050.955566,201.923065,224.127609,463.281616,1373.793335,232.074142,-42.376038,609.512573,FALSE,19.5393546291003,-32.2310416774345,"2"
2576.944824,0.090005,208.362183,239.9133,92.334053,71.197083,-0.434482,3670.683105,FALSE,-22.0694900647971,13.9341956182231,"36"
1029.220581,-115.286552,236.244171,125.955879,-55.265804,103.579475,-63.378464,13998.015625,FALSE,-42.4052124715187,-3.79114892231679,"4"
664.806091,115.527596,265.332672,152.092651,141.101044,119.807381,-22.632635,12284.516602,FALSE,-38.1601806948968,-3.61835767960794,"4"
1087.689209,24.808758,182.503174,159.095337,118.556541,57.026764,41.020267,-204.499832,TRUE,1.5764191426612,32.5974236511115,"16"
82.747856,-22.854279,274.984192,1023.011841,694.009399,123.34819,-26.429268,619.14679,FALSE,19.7580063998337,12.6987359076612,"29"
397.57547,250.076797,162.292862,89.013641,79.634933,13.621826,0.53032,344.895782,FALSE,14.3533227135003,32.6167693530065,"28"
70.35376,59.650623,202.336823,-25.851404,1475.099243,385.339539,35.991463,215.080872,FALSE,1.20867213210658,3.07837702036083,"29"
434.03537,196.08786,218.286179,116.832481,1140.321045,177.260483,205.914093,3054.086914,FALSE,-6.87879183864267,4.39509951230606,"29"
167.205704,308.646362,227.262115,120.477188,44.796108,439.551727,50.882534,347.129974,FALSE,1.2670330159571,19.6398910828237,"20"
97.963562,180.000992,302.795105,125.023132,1811.30835,1576.099731,90.650116,2983.169922,FALSE,-18.7356714509818,-35.8681525241535,"8"
975.527527,153.662186,173.176788,45.51812,-89.859802,76.000969,4.949356,5421.07373,FALSE,-27.0387680306305,20.0193355810206,"10"
-155.863388,206.482712,291.852661,1270.456421,697.375,52.843361,42.916122,6324.024902,FALSE,-17.2837780201698,-3.83714736356264,"25"
361.285065,123.654785,54.861538,263.727661,944.575928,60.701557,22.982489,69.778252,FALSE,13.3956665605317,11.1237703989238,"29"
241.104324,84.997803,47.176132,67.811539,196.534622,136.996094,45.776234,16.918463,FALSE,10.7638356777828,36.4796525645491,"28"
1195.313599,138.768784,185.31871,99.456772,284.306366,923.858093,51.895927,4115.060059,FALSE,-15.5621557171926,-4.30824191552318,"26"
8196.095703,102.330002,151.383057,366.394226,562.398376,122.204964,77.412666,631.899292,TRUE,-33.5179149123346,-29.7773020015266,"38"
995.237366,73.113007,103.904831,64.084755,9.601781,22.68819,7.12597,2438.921387,FALSE,-16.0629234319462,30.6727150459147,"28"
10596.355469,245.592148,167.565186,1253.704102,1896.077515,-41.478634,37.705982,170.870956,FALSE,1.04727669985918,-47.3736035705604,"2"
95.085617,89.001175,70.841209,112.091896,134.165085,124.058945,-19.28195,966.460693,FALSE,8.33198391269755,31.783620768851,"28"
933.203125,208.600418,246.597809,4290.23291,2041.945068,104.590569,36.362736,618.143188,FALSE,38.1242982885751,10.932582932103,"14"
226.418839,206.273651,178.891022,146.397964,50.986454,271.071564,25.808319,647.856384,FALSE,7.87272033854768,27.2203036986816,"20"
10772.575195,173.253815,197.42012,3013.255859,1464.174561,-11.158975,25.569195,-199.009811,FALSE,0.224870292026916,-47.7976152184225,"2"
1254.698242,147.407806,160.892654,482.100952,47.32943,399.533478,28.144659,5231.025391,FALSE,-23.8112911782609,15.8695388891493,"25"
483.033569,43.50378,188.284897,151.56752,704.561279,628.917542,38.536449,144.246124,FALSE,-4.55209370707868,9.02167390116281,"20"
450.522339,193.42691,240.192062,51.421719,44.191044,252.72966,9.524271,1754.660889,FALSE,-9.72954927900326,30.3329424481802,"28"
273.66687,13.003677,181.635178,480.258026,36.909241,73.643906,67.117172,1331.1427,FALSE,0.474685672888607,36.8353779192684,"28"
863.752319,226.902145,188.264206,131.723114,47.085369,240.914413,35.139908,523.357849,FALSE,4.8323625295438,29.769007161971,"20"
-83.256027,124.688293,300.572449,360.954987,874.525085,164.805695,3.907489,10171.688477,FALSE,-27.922192034491,-7.42879121724554,"25"
715.22229,285.92511,139.738464,170.302902,30.243193,467.830261,93.407501,673.715881,FALSE,-2.35770046661998,18.4987684174036,"20"
2640.057617,215.898804,154.986023,29.659258,140.392578,240.852356,10.148487,4698.957031,FALSE,-26.1087906026996,14.0091925727189,"36"
9764.945313,121.727417,204.924591,68.870865,112.862839,41.355629,129.712921,6428.333496,FALSE,-36.0732939526817,-34.1809107935297,"5"
159.352081,166.633469,177.345581,231.349182,526.615173,573.010864,42.555031,3556.079346,FALSE,-13.2922872951043,5.50819552003099,"8"
15825.233398,184.400742,214.076004,1961.019287,2047.90625,50.893314,88.264969,712.198303,FALSE,-4.98582319252652,-45.8396505968192,"1"
4554.683105,211.069199,226.445786,61.54958,248.186646,111.380592,48.305851,9804.262695,FALSE,-43.5386185743529,-17.4384947485762,"27"
1181.866699,159.55513,204.734222,44.379047,202.27095,163.719666,122.134613,8088.897949,FALSE,-35.2867040962971,14.7333368306693,"25"
409.179474,216.87767,84.522026,478.686493,1102.872803,129.879105,41.907246,4168.387695,TRUE,-16.1127649331432,1.34868263295262,"29"
3429.737305,180.882217,182.335068,307.602814,-16.750229,191.093811,-50.500206,2854.212646,FALSE,-24.4979158084737,3.00337589427647,"36"
6098.811523,172.752457,140.179611,153.55069,215.408447,617.039185,-1.369174,76.75248,FALSE,-26.7472708789613,-33.8018903321494,"38"
509.60379,157.505112,151.837463,125.431328,1198.589355,481.537445,-15.067461,366.233215,FALSE,0.81041725424537,6.1031631902118,"8"
165.873642,104.208626,241.210541,410.484467,986.317627,94.283234,91.708931,95.606834,FALSE,11.3217655513462,9.49394230679607,"29"
178.312531,179.760132,269.947693,107.525009,-81.094536,504.661804,-3.265102,1323.25647,FALSE,-4.96461707902347,16.2365903423088,"20"
44.453178,183.132187,161.076767,387.963531,353.376648,271.486176,-35.689377,857.821777,FALSE,9.18254902435727,17.6321700613074,"20"
4577.74707,82.201302,268.15744,227.944656,-114.201164,536.367554,127.658951,80.012825,FALSE,-25.5753837393943,-16.1293114495134,"38"
7789.942383,186.543671,94.891205,2456.552246,2248.726074,-67.911804,-25.027925,-494.567627,FALSE,16.7741183484496,-44.6751058011016,"2"
719.235474,122.088806,176.44342,437.658905,510.641296,110.273079,3.576102,3173.097656,FALSE,-14.3984405293794,15.9270460741694,"10"
1489.04126,251.738785,195.842728,367.774353,44.725094,137.956772,2.730924,5032.222168,FALSE,-26.0375818270394,20.1226017462269,"10"
-133.549072,18.76351,156.449615,95.886757,422.511047,86.186371,23.534184,335.946777,FALSE,15.0709441451344,23.5136387647789,"29"
8229.55957,168.043869,196.293213,1799.049072,1963.304565,51.937534,125.191483,103.979378,FALSE,9.99901835502108,-46.6102214404976,"2"
1082.426025,132.961899,210.217178,76.05265,363.296539,523.72229,63.874844,1752.630981,FALSE,-7.92535620305292,13.6412176849306,"20"
357.210022,55.801201,91.29818,565.821655,1049.685547,42.834862,54.147594,1004.778076,FALSE,10.2942445860845,7.03140794205818,"29"
414.933624,155.599167,244.153717,222.704269,109.864388,567.106934,26.418598,2794.587158,FALSE,-11.9481819890522,10.9050768690465,"8"
2250.94873,139.716629,252.754593,91.84079,160.168152,58.437286,54.855972,4115.408203,FALSE,-22.6259139849103,16.632609258244,"36"
10995.083008,88.960693,65.031441,1107.966675,906.71405,34.08651,-1.971598,234.377228,FALSE,-3.9378082479535,-48.7403318280895,"2"
137.21228,74.747818,116.531128,66.159004,74.032326,1179.79895,63.021099,927.947083,FALSE,-15.1602076498835,-14.5221372488883,"31"
-39.869499,26.302351,177.233582,374.919708,300.06192,370.236481,52.068878,412.381439,FALSE,5.34060742923717,17.3000921178247,"20"
1645.38269,144.63884,305.500427,114.912437,-8.102744,43.261761,77.267456,8906.013672,FALSE,-37.4965242202675,10.0287250722562,"25"
212.750763,181.164642,294.606873,490.884521,47.18671,351.860291,116.11898,6631.139648,FALSE,-30.6959036913857,17.1411266303832,"25"
10597.544922,107.977875,225.270767,1493.578979,1130.004028,-71.045494,17.557573,-56.797485,FALSE,-2.16881053693468,-49.1199124508482,"2"
3018.182861,189.459717,184.174576,111.720383,66.550995,639.112122,101.751587,3730.018066,FALSE,-16.6559339397218,6.89341703593216,"26"
582.247742,180.775726,273.932465,34.019802,267.862213,289.192261,47.971741,3202.252197,FALSE,-17.1366774714656,20.3964438766706,"10"
604.846069,192.995544,232.980377,851.450745,1149.036377,391.996765,31.612083,5582.610352,FALSE,-16.1567696204861,-5.96538178819905,"8"
2.711014,115.614227,164.063599,251.647369,861.327393,707.875183,6.613388,1960.550171,FALSE,-7.87231619502836,1.98443071117227,"8"
1058.382446,100.933815,175.56311,36.021412,251.233047,97.194748,46.905609,5955.549316,FALSE,-28.5407932818929,18.9506938811622,"10"
395.474487,116.314835,242.50119,301.257233,333.036499,147.094788,59.290379,471.56955,FALSE,12.6854232892434,29.6436659806152,"28"
62.128265,217.691086,111.789589,404.856323,170.43541,161.39151,42.579319,2850.93042,FALSE,-19.0935070986753,30.4326319022367,"10"
381.69812,246.156769,200.82753,267.67099,920.025879,93.135513,51.907101,1632.459961,FALSE,5.84152713094191,9.45184256225906,"29"
3177.27417,229.325348,121.587669,152.417862,-35.185371,570.264343,18.110506,123.453903,FALSE,-15.299671078246,7.40776785068976,"16"
8122.923828,125.03125,200.950974,58.37738,358.293976,604.266357,24.540728,330.651276,FALSE,-29.7104308498093,-36.5156480282029,"38"
172.894714,229.831482,190.198608,422.036438,82.585266,233.328766,64.426964,3202.80249,FALSE,-21.1779838075408,29.3731013559832,"10"
526.121765,109.132751,254.000427,373.359131,1017.369995,872.567261,30.895159,6239.763184,FALSE,-19.6926238374743,-15.6779809400084,"8"
745.976501,100.108711,107.175476,194.457108,-143.05014,412.218445,-32.275288,217.151779,FALSE,5.84401341432699,20.4290934081053,"20"
7755.846191,164.776154,137.237961,2697.583252,1487.383179,79.684738,61.730988,28.655073,TRUE,4.05098400770403,-46.7142380513474,"2"
-44.397964,93.414879,138.816132,-61.691647,2084.325439,1262.283813,4.669258,5431.342285,FALSE,-19.2009128740951,-31.5658197939289,"8"
8350.298828,225.945831,227.355408,158.577026,-7.790032,341.10965,30.577587,2531.731445,FALSE,-35.7992467936484,-31.4625513458652,"38"
275.578827,224.339951,148.743027,684.749207,563.397827,103.637596,-21.794016,1266.950562,FALSE,13.7362448280276,11.4926241125626,"29"
-9.785696,63.837921,123.332207,11.343257,1126.274536,1647.34082,-32.844597,7241.390137,FALSE,-21.9114875618181,-34.4237689675952,"21"
2812.367432,165.757278,232.905624,17.888161,412.389587,633.975525,60.33329,6121.703125,FALSE,-22.0421810553775,1.11161864427708,"26"
98.063919,91.685249,88.088707,121.036514,590.447876,499.496582,-11.604235,-331.228577,FALSE,2.21760140349504,13.4655138083424,"20"
300.686951,60.261154,109.646126,85.895996,824.659424,177.583221,204.766876,1350.616089,FALSE,2.94544877486403,13.3702674591089,"29"
555.991089,47.221874,165.050323,184.119415,368.757141,78.486053,52.287281,1116.642578,FALSE,2.53114291476393,29.884921985503,"28"
3298.637207,74.177452,230.090469,91.154694,93.264458,-40.629101,26.560757,5795.648926,FALSE,-34.410559874819,-2.3183835427479,"36"
2937.905273,73.647667,222.855286,662.903503,1210.391479,237.569748,37.872444,8623.484375,FALSE,-29.4150732128701,-10.6405916149125,"13"
7709.236816,184.595612,356.482208,1188.931885,1617.300293,133.31543,50.959854,3854.890381,FALSE,-2.10765645546481,-41.9776836152237,"13"
16832.759766,183.433975,185.186768,1237.784424,960.253662,185.56871,29.234577,263.769073,FALSE,-4.34664354688293,-45.5263260947808,"1"
23735.230469,106.047997,121.641907,1956.09375,1913.417603,-37.29607,97.318657,-137.709442,FALSE,-10.381529015995,-45.1737008675441,"1"
9850.22168,155.219788,177.170593,690.265991,1782.238159,22.82066,8.83467,-199.725159,FALSE,2.26946357595079,-48.3958451909321,"2"
-4.611421,89.855789,168.047394,1583.078491,1629.541138,90.794006,61.601864,381.442474,FALSE,14.2815472889518,0.312277086732843,"17"
5065.992676,151.47699,60.900196,2851.8479,1788.523804,57.047527,-32.583012,202.579712,FALSE,40.669578254383,-27.6801987720035,"2"
922.050293,90.468185,175.303284,3461.249023,1641.236206,113.561081,66.785683,237.831039,FALSE,37.485150672448,6.09476688431387,"11"
8633.570313,228.968201,289.06369,4285.189453,1731.956299,64.740036,-61.789497,-7.696189,FALSE,11.5097629683904,-42.9618715131279,"2"
146.841354,76.160957,219.224884,143.064682,-137.724457,741.850403,113.017761,7440.853027,FALSE,-20.5009759451572,-9.01814034514276,"26"
-17.00885,209.948242,215.597931,767.634705,802.949646,167.697968,-16.801376,2975.476074,FALSE,-3.62024816274145,5.7143822226322,"29"
631.975159,171.272766,188.979324,114.264915,-97.19886,57.903137,-21.83695,10516.876953,FALSE,-36.5148319968973,0.29398128118767,"4"
16387.714844,183.590805,127.505531,1701.89856,1567.196655,289.230774,-4.175982,-462.604767,FALSE,-5.80639418994352,-44.4015319587603,"1"
419.294403,51.27084,394.504333,80.185249,-8.293623,50.578636,-26.965755,13110.157227,FALSE,-40.3920847029163,-1.63425033760327,"4"
-180.181854,91.634727,254.699402,434.079071,562.496826,125.468864,-30.015936,251.67543,FALSE,18.3525365319947,18.0610006240675,"29"
-193.042313,76.435425,259.753052,88.778755,89.098808,120.072319,22.678207,1956.85498,FALSE,-13.9920444481833,39.8560327796293,"28"
792.640381,239.807297,295.85675,353.646912,135.737396,114.118866,171.31575,8131.876953,FALSE,-39.9951153647414,18.9160733708706,"25"
8070.427246,77.556458,0.523459,3689.731445,1753.872314,114.914757,-26.66165,-99.179207,FALSE,15.1829364257997,-43.5195141779055,"2"
15061.389648,129.829117,104.645004,948.541626,1357.145874,75.642441,53.933758,2146.88916,FALSE,-2.67674011790726,-48.2759102222679,"5"
18020.990234,37.590187,172.217209,2344.130127,1239.559204,-237.262039,64.006271,550.194763,FALSE,-10.6504351036899,-48.4151751256634,"1"
1636.140503,158.248367,138.964813,1644.114746,1348.751099,-23.795965,13.219671,2233.40625,FALSE,19.5913523123057,-4.78201379051588,"13"
6441.219727,108.559685,173.274719,100.584381,-85.512924,283.674622,34.79393,342.325592,FALSE,-35.1779720249733,-32.7651340886757,"38"
90.528992,177.541367,212.01152,70.5616,474.736938,49.778461,81.60302,183.895676,FALSE,11.5545053712508,28.103443704317,"28"
19710.630859,66.027046,215.84433,1525.593018,1461.641968,71.225075,19.981487,966.173157,FALSE,-5.93999458249682,-46.3988065386599,"1"
252.508453,147.31749,138.863098,351.727081,123.656189,434.971863,5.151974,143.347855,FALSE,5.67150762177581,18.8849803013704,"20"
137.483597,17.340633,167.99913,333.149109,1386.764771,147.33844,34.738712,229.921707,FALSE,8.59021903981219,2.98355573010786,"29"
-107.70472,98.740601,104.312538,59.365891,1260.892212,612.952087,62.63047,2861.755859,FALSE,-7.87422830107611,-1.8025744853823,"8"
1698.075928,171.815048,169.652527,80.710045,61.088326,118.072517,68.048531,2371.103516,FALSE,-13.9327351446332,26.1842585628748,"36"
2644.679688,159.663483,183.359253,94.509537,196.170578,262.722229,79.673553,2019.284058,FALSE,-14.6018657755963,20.4410203849045,"36"
9041.652344,124.506569,193.988861,2341.037598,2609.161865,37.323982,91.218163,-158.266525,FALSE,9.67985028315763,-47.0561912274473,"2"
325.732025,233.531433,221.892288,612.664368,1436.495605,394.763458,165.399841,131.328033,FALSE,3.10924159793421,3.2624885523849,"29"
775.919189,130.624786,256.490234,189.273041,-156.049957,527.201111,19.856207,5103.695801,FALSE,-19.2359823307417,8.62652439209505,"26"
13735.145508,59.546204,247.648773,3807.364014,2303.389404,-115.942078,30.128407,93.770081,FALSE,-1.05652594521424,-45.5869576168652,"2"
1253.92981,154.111282,212.262314,243.124863,1819.509644,9.189675,19.566292,4873.979004,FALSE,-10.7151908701812,-9.69528494872127,"25"
336.136353,109.366165,166.879532,82.353058,465.809326,-4.535337,35.807415,-68.085007,FALSE,17.6949386548007,23.4337801187613,"29"
4116.648438,52.16431,196.78891,178.603516,-185.45079,15.980692,-6.479682,10344.117188,FALSE,-41.7161608575516,-14.8133007372262,"27"
9768.305664,91.875984,114.931358,2301.003418,1201.636353,11.073424,-8.357552,-454.54126,FALSE,2.15406649739307,-48.0482570347918,"2"
2093.432617,72.313354,264.330444,106.982491,122.564407,35.710533,99.266373,8544.683594,FALSE,-36.7719171219692,6.09111726719419,"25"
12643.892578,201.110733,161.635757,2026.699585,1470.321167,140.499008,26.017391,341.424652,FALSE,-3.70834914581784,-46.2936793724259,"2"
887.215271,198.892899,171.092896,138.489731,-33.716671,121.056953,101.473213,5438.671387,FALSE,-31.3644766392855,26.3624449412563,"10"
702.836487,233.17067,155.028107,393.930725,1243.713989,798.209412,127.140121,1582.532837,FALSE,-9.22305415835983,-1.07500891798184,"8"
1251.819336,120.12587,122.552361,145.924286,91.660027,315.505432,117.158867,297.554199,FALSE,0.296967836651839,30.1048448225966,"20"
905.060059,123.09227,242.140488,167.945374,4.754114,125.434708,34.622608,6077.423828,FALSE,-31.1631015800869,21.3264086614189,"25"
2886.869629,77.737167,279.803619,179.369675,5.401853,176.159302,86.700859,1070.623047,FALSE,-18.6271828740782,13.6851282202664,"36"
5575.98291,141.33699,179.802719,58.879219,165.672363,198.993729,52.730309,370.461609,FALSE,-30.0855125022919,-28.1408883419117,"38"
3147.882568,143.903702,138.06575,210.247543,94.809052,66.674355,88.527145,6791.223633,FALSE,-34.5965819139068,-2.23293520890301,"27"
2876.928955,228.579666,194.518555,191.003189,39.280403,57.249783,60.763298,6802.504395,FALSE,-33.7476212249328,2.37395534525495,"36"
269.277039,136.769623,237.438156,642.118958,550.123108,138.865707,79.230896,5025.150879,FALSE,-21.8835171841623,11.8477435156238,"10"
763.463257,32.023891,160.1642,67.101082,378.076935,570.546326,43.239685,-21.844419,FALSE,-3.72477020153708,13.5785767481062,"20"
8.692887,114.023743,215.257233,492.347656,700.661377,242.542007,78.202538,3780.034668,FALSE,-12.3880767504142,7.05169800704465,"8"
28.229013,153.95488,274.09613,273.950409,429.18161,2256.888428,39.926167,4078.530762,FALSE,-19.9345736969241,-40.2691593062761,"18"
2468.415527,113.320648,181.021927,731.064087,851.093567,141.758575,-12.20145,1606.575073,FALSE,11.4590950912664,-0.62500557759484,"15"
23.638464,152.928345,81.605133,41.565285,1298.550781,74.108757,50.110909,2274.504883,FALSE,-1.72638595428602,0.780079470307233,"29"
14585.115234,31.148558,126.021187,1884.471802,1683.506958,-142.809113,-23.156301,-715.479126,FALSE,-4.88129668118368,-47.2899905131462,"2"
331.90921,129.932312,249.950745,624.240845,774.099182,205.348373,94.579926,211.864456,FALSE,13.4807248224179,12.7750871088093,"29"
100.512703,56.766411,300.54483,212.653091,840.034851,50.579834,65.968697,2032.983765,FALSE,1.38170024550194,10.785309834386,"29"
1319.055908,76.833786,210.903656,87.123978,156.983383,172.787857,248.066483,5677.309082,FALSE,-26.9441652528363,19.6841792224651,"10"
1749.541504,61.084393,239.311813,100.590027,109.402908,207.268326,36.468437,5332.305664,FALSE,-25.9738045560016,18.2913491858715,"36"
20513.513672,111.809105,234.365845,4687.739258,2505.250488,-125.498726,142.976196,192.17688,FALSE,-7.25556123672004,-45.1990702395126,"1"
17189.205078,68.141891,151.313461,1108.807129,1279.594482,-16.484251,-28.14245,157.339645,FALSE,-6.37403694302098,-46.1493894097754,"1"
263.048462,156.312302,216.47435,171.809921,109.763458,481.875641,53.224884,63.207211,FALSE,0.352997289757757,17.4347652066203,"20"
437.803467,128.369125,215.957428,129.891525,137.322968,139.714951,126.714989,73.884392,FALSE,1.3140055763356,44.8971168343521,"19"
609.018066,213.645081,230.998001,961.778381,1117.659302,104.951027,75.03273,3736.362549,FALSE,-6.9746928574038,-0.182367217626296,"29"
2298.647461,168.100311,344.337402,-7.55419,344.194824,236.049561,41.189995,3417.836914,FALSE,-19.0997049257032,20.8625694449307,"36"
2016.349609,123.607574,264.584351,207.004532,10.541897,55.75148,36.652317,13685.020508,FALSE,-45.7097996163942,-5.27912786426431,"23"
-134.868195,132.493973,195.90799,134.355423,580.924133,97.323746,2.451601,2278.710449,FALSE,-3.8612774941928,17.5496841720235,"28"
217.031082,134.027496,190.938614,531.054504,574.64679,316.615417,-8.233538,4005.112793,FALSE,-14.8599364063545,8.55082320999994,"8"
2925.755615,203.337753,300.635559,1031.729614,928.163757,533.742859,24.627497,6850.979492,FALSE,-23.7249439252958,-2.61807862521932,"13"
545.320435,193.889008,202.832504,147.898132,61.121532,1268.01001,41.43557,10224.28418,FALSE,-23.9183724157848,-25.3325935067469,"21"
581.150024,281.767181,247.337906,140.564728,159.377975,2.446872,103.926125,604.005554,FALSE,2.72106443619195,41.8098598277963,"19"
13278.828125,147.912399,85.325455,4653.554688,1577.566284,48.729568,-80.985184,212.670013,FALSE,-1.66018110293354,-45.6753359510312,"2"
690.677368,151.282242,150.022934,173.454346,1321.313843,39.605972,65.105194,39.243599,FALSE,10.6642969862304,5.73624754568193,"29"
6162.47168,193.391586,159.577957,85.412025,219.349106,348.24588,22.217907,290.850586,FALSE,-33.2819210355772,-32.7564931634333,"38"
310.813171,206.873947,153.806046,351.735077,524.996643,79.18837,20.749857,1757.279907,FALSE,0.485460811161166,17.4704778474648,"28"
84.168495,271.332611,220.969894,142.384277,997.728333,1579.040894,11.9612,5153.710938,TRUE,-20.8530762263285,-31.4996008101867,"18"
14616.280273,221.346527,222.836823,90.641777,267.815643,152.037674,43.825333,6271.825195,FALSE,-33.9443912450514,-37.1412874718001,"5"
327.291565,62.475464,151.90657,158.898514,392.307159,84.268944,62.327621,1663.914917,FALSE,-7.04356311414961,31.5837541705048,"28"
477.512268,-336.027161,134.596802,64.554726,1033.645874,520.902832,-37.794201,3474.699951,FALSE,-11.937948475111,-0.560662218668571,"8"
1376.697998,223.448135,261.825806,450.142609,81.349091,403.622192,57.664345,3170.978027,FALSE,-14.3365034248254,18.7255211200207,"36"
3678.159912,267.341583,222.486404,195.558121,121.456955,635.403137,53.878365,5789.714844,FALSE,-26.3035848500396,-4.63374154598468,"26"
45.533951,114.322166,189.925919,1104.173218,1268.966919,66.959732,60.922554,19349.240234,FALSE,-43.7101446727553,-1.35925995769216,"21"
1875.206665,145.281799,157.494797,242.09874,-370.913361,490.668427,14.373517,479.95752,FALSE,-5.21397355318939,17.5657621829161,"16"
10048.141602,178.60408,173.187881,1699.418091,1303.708862,26.050734,36.811707,-162.096268,FALSE,-0.550596234957156,-48.632125647023,"2"
17664.517578,255.528198,189.740891,3997.115479,2202.188477,-2.666664,50.852951,688.714783,FALSE,-4.04104933365774,-45.2086501992649,"1"
249.368607,29.122124,127.584595,-0.0672,589.304565,164.078094,0.06548,904.949829,FALSE,11.0279942352205,19.1540173482287,"29"
17318.724609,270.110443,132.645523,4044.067383,1999.442383,-32.533787,-25.4366,166.172424,FALSE,-4.46783226811875,-44.8322371919227,"1"
392.168579,228.745148,119.593407,80.350677,87.653664,491.151184,27.3018,6957.41748,FALSE,-24.1355034582665,2.69345586220683,"25"
679.992126,160.645248,125.621735,-29.866852,1850.237305,251.926788,-15.603004,-101.177261,FALSE,4.22714915063611,-4.00965651454722,"29"
135.303482,90.293518,266.914917,316.790619,241.125534,394.133728,36.340687,1960.92981,FALSE,-6.45565908871374,15.980878998174,"20"
36.175774,156.025345,127.599472,1317.617065,959.736023,18.003998,-0.095818,562.671448,FALSE,20.0611190430179,8.28083333151908,"29"
-30.679695,164.124435,194.028473,502.349213,2092.60791,92.455208,84.762184,635.61322,TRUE,3.19828356011474,-5.98533837437628,"29"
272.706238,94.739723,250.63208,138.646606,24.026201,114.48996,22.729902,528.351563,FALSE,13.4604772240095,35.7532777640079,"28"
370.848083,305.657227,124.415825,102.779037,840.654297,154.937057,28.018309,1145.02002,FALSE,7.91137489127232,12.1633786262731,"29"
15580.84668,118.748329,315.035583,47.777225,121.687614,661.705139,-104.318878,5863.025391,FALSE,-33.0232425412901,-34.3508557796268,"5"
-16.918953,-259.742004,-93.056061,94.96225,1362.362305,1926.588135,-46.747116,2257.155273,FALSE,-21.6252341198731,-40.9083469064073,"18"
314.097778,-265.812286,140.526474,347.75705,56.39872,293.469849,23.129833,-214.302078,FALSE,14.2394644894811,24.0594115050973,"20"
670.321777,143.122696,163.901199,65.914955,-7.751505,71.174072,57.702049,3991.735352,FALSE,-27.8701733172791,29.4365969625483,"10"
322.563232,252.472153,238.433228,232.563034,457.83844,386.178223,38.192184,912.38147,FALSE,1.24357339477543,17.1426956784371,"20"
5433.896973,176.140015,105.888054,106.775513,-135.398239,164.955582,14.246447,2121.572021,FALSE,-34.2890333660442,-25.634576702686,"38"
293.950836,303.611115,115.892265,74.356232,-1.881794,225.056442,-28.025345,128.223343,FALSE,13.9427027030707,27.5142854551059,"20"
757.950012,196.718536,159.621857,133.597794,143.067429,110.496246,59.459625,365.014709,FALSE,5.35948235096654,36.3298095594335,"28"
175.123611,148.524643,204.308212,-51.890461,1530.666748,720.624634,55.557049,1653.120483,FALSE,-7.19552820891875,-3.03916716559501,"8"
6.460545,147.806824,136.463821,146.091248,575.501709,364.334625,30.999016,9550.296875,FALSE,-28.8019984466576,-6.76947470447142,"25"
-164.101974,176.30484,341.770355,36.270973,82.190109,199.597916,-38.765015,4599.250977,FALSE,-25.2808367392776,23.4484051388056,"10"
188.230545,181.383789,77.653275,-8.658989,277.923401,104.549736,18.973042,-60.979691,FALSE,13.5917263412632,32.1611571807599,"28"
-199.996094,201.960663,172.681732,111.53624,429.645599,208.98941,-82.063736,6462.927734,FALSE,-27.2822793567001,11.3535132247452,"25"
-65.467148,186.986969,-6.383131,70.51487,1039.942993,136.421555,-57.507092,1293.092529,FALSE,6.98459265875404,8.13506180627519,"29"
2809.671387,138.891373,192.721283,677.578247,2061.797852,143.365768,88.397293,258.540314,FALSE,14.4026957812411,-26.3071294742644,"6"
-296.946289,151.655762,19.039761,19.339993,160.082718,155.655136,-6.673437,-108.52359,FALSE,15.2199163575587,30.0068970560308,"28"
502.103363,192.55278,238.011826,40.919651,111.709084,131.639908,64.686638,4721.72168,FALSE,-29.0543223612164,27.0088876126206,"10"
177.668533,151.904755,145.736481,298.004517,212.523315,67.090263,28.024559,1166.715332,FALSE,5.71327656760965,30.3251358917523,"28"
11197.067383,160.821472,115.529091,2360.634277,1392.011841,100.406258,22.755913,-91.737488,FALSE,-1.92453010390071,-47.2672335009989,"2"
6071.204102,-85.100616,5.851527,-52.195156,1186.09082,53.519318,-90.84745,136.209137,FALSE,5.61268120930848,-37.0360742841166,"2"
3503.868164,-143.573044,96.850555,81.130554,154.239777,32.082981,49.984554,4486.682617,FALSE,-27.9542479144892,-3.78542453208686,"36"
1269.779053,-458.961578,49.796585,67.435692,-24.132101,144.027222,12.534878,-161.346832,FALSE,10.117754388387,28.3703019481815,"16"
1147.648193,-452.464691,284.890594,125.573608,-56.951656,515.90564,78.683258,4623.353516,FALSE,-20.4283118652962,7.06774397989326,"26"
445.049072,-183.329147,166.170471,53.964352,152.764404,433.214813,187.753235,100.388794,FALSE,-0.474203133434264,17.1346870988806,"20"
5847.924316,274.081451,182.236206,131.98172,186.463043,649.01947,7.303148,343.394012,FALSE,-27.1239464181446,-30.9307917084251,"38"
18109.361328,149.522552,85.753784,2194.15625,930.738831,4.692553,49.624554,-37.800865,FALSE,-8.39559995755412,-47.3633318710989,"1"
1190.017456,157.612549,188.181564,53.933617,76.2649,356.644257,-31.455742,565.089539,FALSE,1.96016934705174,21.5496730215457,"20"
152.976547,120.210876,-12.283444,-90.52272,523.654968,136.802155,-46.050411,455.362976,FALSE,13.8564325209366,20.1250447408074,"29"
784.031921,54.097404,200.15744,85.0616,-51.148293,1129.259521,40.632442,7130.708984,FALSE,-20.4864064057881,-21.7983158376869,"26"
1688.174316,233.127213,210.954773,76.845245,21.680716,-1.863535,62.716248,7151.239258,FALSE,-32.9755108092708,15.5824657454987,"25"
907.845337,93.22142,241.817581,213.236557,106.99791,335.743378,12.729175,2799.37207,FALSE,-15.3040362570115,20.4659429067108,"10"
41.527679,186.723145,226.733261,248.84082,1145.04248,135.091965,-66.914932,388.555603,FALSE,11.9483684662841,8.63291085871877,"29"
190.890274,127.630219,164.370987,148.826111,-198.219177,135.452393,-14.456918,582.438904,FALSE,13.9129933789029,31.790802428748,"28"
8569.073242,191.685104,163.567352,2232.78125,1684.231812,89.555756,-12.82549,225.297791,FALSE,5.53366816492731,-48.0797120966331,"2"
139.248489,159.31572,132.413086,4.965453,553.5354,65.733673,4.796864,206.938843,FALSE,15.2366489544438,19.405228434838,"29"
1600.459961,148.584229,248.777802,69.746368,286.483002,133.322952,109.558495,9294.018555,FALSE,-37.0900777573307,8.30506400919841,"25"
3345.672607,85.07608,170.378021,461.497772,1720.87561,138.009048,32.221786,427.339539,FALSE,17.401172946864,-26.9508189511735,"12"
146.542145,209.603943,309.911743,220.32901,934.549194,35.866146,-23.675797,480.623108,FALSE,14.0826248921007,11.9013030265366,"29"
3388.21582,130.094727,238.15802,151.047729,-105.368347,74.730003,25.339529,7005.801758,FALSE,-35.2250927914219,-7.68529218537196,"27"
361.727631,-8.688054,194.951492,169.631668,599.290771,192.066711,6.389417,308.36142,FALSE,13.62204749305,17.9067385149222,"29"
257.634583,144.139343,150.439133,228.541687,734.670166,133.976578,49.952187,3474.519043,FALSE,-12.1320667970291,9.90779945670745,"10"
589.874878,106.597748,188.918243,1886.99585,959.4776,29.073296,53.564423,1700.114136,FALSE,17.5034272439364,0.870281829540829,"29"
64.353363,132.398239,207.918823,338.073456,837.378052,185.038712,74.717995,13339.313477,FALSE,-36.5807359514529,-6.33343538005129,"4"
16460.083984,48.362453,77.933762,1016.899658,770.704346,-55.840843,18.792328,643.853699,FALSE,-5.64501410820374,-47.9607614340325,"1"
1313.62854,82.074371,221.571838,52.95396,29.272375,108.160088,72.846771,2581.432129,FALSE,-16.5131935799458,29.0904314961912,"36"
426.955994,80.031555,305.268372,138.043381,-115.531807,51.353329,27.655918,7531.28418,FALSE,-37.5470060958997,20.6183911934185,"25"
2.442725,105.495995,117.965858,883.873474,1058.955688,178.951355,17.165777,272.404755,FALSE,13.6906121544083,8.16247046228984,"29"
1.080193,88.922974,203.762924,38.497578,1206.046143,1130.637207,2.691152,6599.675781,FALSE,-21.0611706157214,-25.5892623216343,"8"
250.270859,61.424229,162.233749,172.509918,386.421143,47.309017,55.108879,-73.494041,FALSE,17.271692832746,26.0615978882958,"28"
2118.866455,131.301773,376.452576,69.432098,45.50753,29.454868,50.78368,11489.922852,FALSE,-42.7602349949724,-5.3008465585394,"27"
-75.183098,126.762726,157.605392,441.86026,94.046707,96.581696,28.65646,1253.50415,FALSE,6.73391054870005,31.2758554991928,"28"
449.428833,145.150299,291.893219,35.984489,330.011139,86.974068,57.740665,10420.740234,FALSE,-36.2819930372831,1.37133237793965,"25"
593.753113,134.76181,259.204071,818.903687,1284.501221,108.31002,-17.03574,1586.632202,FALSE,8.42004029308874,1.64473628675281,"29"
653.662903,96.304703,146.400055,223.189972,618.756775,284.341614,35.465622,44.586044,FALSE,11.4568043293858,16.9258656809856,"20"
194.760742,104.368126,214.300323,389.255371,1107.919922,116.169304,65.543465,5131.890137,FALSE,-16.4642493404718,-0.217185207796878,"25"
4294.293945,166.498184,294.870209,303.935455,-145.578476,221.620377,24.731548,265.062988,FALSE,-21.6290191752314,-15.4961403209909,"16"
6497.087402,135.290634,54.814884,4921.245117,2142.614258,104.186165,-9.138001,127.071053,FALSE,37.4251053323605,-23.1403264026406,"2"
998.197876,166.775726,240.378403,203.585327,-75.938744,-21.936411,14.703271,6265.230957,FALSE,-31.6837878411686,20.5800874376007,"25"
1530.7229,192.582703,181.687378,311.427979,747.702148,34.444237,82.739273,3118.852783,FALSE,-12.6642748163263,14.4451743874726,"36"
334.82196,101.656349,228.573318,137.929764,87.264153,229.811829,7.77863,1002.569092,FALSE,3.69846970515026,30.5163315308345,"20"
4044.928955,101.970787,201.224731,232.385941,-8.080257,32.002834,117.39344,4819.428223,FALSE,-30.2659896092594,-13.70560863507,"36"
330.120911,31.292652,265.277924,530.032654,1137.876221,192.241241,9.469307,4176.102539,FALSE,-12.3811574569314,1.019258891121,"29"
1100.020874,122.755165,144.487549,137.537079,-26.967392,78.345978,16.186373,3616.063965,FALSE,-23.4452847685164,25.3388331059494,"10"
1415.713257,236.013062,311.786835,161.802963,111.373314,52.925697,-20.72402,11086.045898,FALSE,-37.3858458149408,-2.25921056044159,"27"
2021.904541,99.564529,191.133423,55.261906,132.386749,81.083771,106.687851,5249.349121,FALSE,-25.8873081486907,16.0730009289924,"36"
3053.449219,102.253685,326.93103,166.754349,-90.500381,104.66996,68.41288,10864.15332,FALSE,-42.7581222044564,-11.4828065627438,"27"
370.359894,135.364029,144.711563,140.422241,1124.642212,649.0177,22.247257,360.169952,FALSE,-5.30019016089076,3.42707105729535,"31"
3005.176514,63.125786,195.981888,137.414627,14.865805,-101.938499,204.634659,8702.558594,FALSE,-40.1295587186118,-8.58827791737106,"27"
8505.368164,146.949326,331.174225,1690.636597,1865.481567,43.677551,52.446049,65.278069,FALSE,6.17967435830399,-47.4767619744367,"2"
382.930267,186.474609,95.571762,271.220398,903.626282,231.593567,68.244377,401.149384,FALSE,9.84488460710758,10.7996025140527,"29"
2687.848145,154.768112,177.820404,103.033165,130.073532,163.055038,-5.084641,7285.246094,FALSE,-32.3951477847534,4.28653627531921,"25"
1581.279297,135.747665,207.604568,1583.079834,2528.358887,16.148499,67.314369,505.437958,FALSE,13.7786091027987,-20.0577124265974,"6"
201.218781,118.837685,161.970917,341.939667,131.334686,146.738815,20.712029,437.051636,FALSE,16.4716624502807,30.3949872529423,"28"
4525.522949,148.86998,179.639038,126.984978,271.670288,51.71138,41.292046,11924.290039,FALSE,-45.3387529452905,-15.9211896010148,"23"
1730.239868,45.246227,232.531876,100.26165,3.303088,29.571056,156.162338,7498.498535,FALSE,-33.7985398679176,11.2642314603227,"25"
6.449599,80.488731,185.587814,91.891762,1113.599854,93.05011,115.738495,1660.188599,FALSE,2.28922396231303,5.5594483105284,"29"
7075.234375,150.997894,288.371918,55.585957,359.612732,18.060131,38.269333,11949.691406,FALSE,-42.4338321449887,-23.9795208177993,"27"
4625.653809,148.64769,217.521179,139.89679,-8.310402,263.323639,107.986031,25.772192,FALSE,-26.0225965586301,-19.3160113495246,"38"
426.980255,98.282387,245.644028,160.371613,782.653687,194.614594,17.258272,1206.212524,FALSE,8.31740325223186,13.5676494631471,"29"
468.199036,80.278763,174.709351,431.375916,410.383667,978.395142,19.127104,2488.869629,TRUE,-11.4617436005383,7.53762954488109,"31"
536.709106,196.102249,165.454422,575.387268,735.330139,110.197136,-16.689762,2966.266602,FALSE,-6.56418453863859,6.51317950020992,"29"
12615.28125,-56.102062,132.145264,1614.329712,1597.473633,-69.520737,-20.367186,563.862671,FALSE,-4.20577414116252,-47.350430191979,"2"
2760.230225,109.587967,246.636826,127.273064,102.807442,146.971619,82.45961,6981.232422,FALSE,-33.0712049459075,2.48165184148937,"25"
307.165497,137.501831,174.557846,396.059784,1098.346558,135.999207,59.360802,380.208954,FALSE,10.8234107737385,7.2864969486544,"29"
450.35022,131.231506,194.875687,93.042122,32.874451,607.283752,0.993464,651.993835,FALSE,-4.88681370895548,12.8270253425799,"20"
820.923889,75.838989,255.174545,83.993637,235.590317,312.037537,-3.266279,484.18808,FALSE,6.5395289353295,24.1684017655493,"20"
-83.686981,130.210556,183.208603,1278.261719,646.9104,480.809235,64.112823,7826.432129,FALSE,-19.8383312013624,-8.12764452401458,"25"
201.237045,103.404587,218.393967,98.363876,-19.38068,418.030762,46.439896,2223.245361,FALSE,-8.33374169910835,15.7810226667653,"20"
82.050621,155.645569,277.48053,92.219017,124.878197,54.099316,56.386204,-135.705765,FALSE,12.5866496139111,39.1434817428827,"28"
997.874084,79.961029,230.23497,190.669098,42.177467,93.381584,6.262051,8141.881836,FALSE,-36.2715535525519,14.0589666067387,"25"
9005.725586,233.950989,200.401535,63.360397,93.050781,-32.201229,83.97847,7452.222656,FALSE,-37.0111570391857,-31.6157441591659,"5"
173.938141,19.718027,242.421066,472.484406,919.942322,404.034027,24.219883,6539.960938,FALSE,-20.3745301273111,-3.70839944366964,"8"
14195.693359,107.106293,120.426254,2671.449951,1694.398193,82.963997,90.894592,451.004944,TRUE,-3.51445607575645,-44.5340954540516,"2"
-71.705994,51.420921,208.765976,95.388947,-37.607059,154.892807,-14.596848,626.447083,FALSE,13.9516683643108,32.8899235461749,"28"
1928.096191,155.593063,369.803925,105.821869,-13.026711,76.702728,-17.567122,12829.787109,FALSE,-44.188069723247,-5.99162912870411,"27"
33141.417969,172.346802,238.166916,2755.769531,1523.30957,-62.162876,110.575302,157.677475,FALSE,-11.788470171501,-44.3251949319807,"1"
344.299469,205.897018,148.7854,325.635345,140.249802,163.156906,40.466793,2761.459473,FALSE,-20.857957715695,34.0196696971927,"10"
-213.896851,71.780762,220.973999,92.052475,326.297638,90.517891,50.545883,723.965088,FALSE,9.47154655190994,31.9589217547011,"28"
46.691959,176.274673,245.957458,223.518341,1044.219604,307.298065,98.745689,11529.232422,FALSE,-31.408647813433,-9.79041699337831,"25"
484.143768,-20.995501,218.968521,19.042839,322.020386,110.623207,-34.760262,5288.666504,FALSE,-27.2131868883277,19.841462259935,"10"
-70.461433,139.356674,203.809219,-194.088318,2084.43042,490.712555,9.879624,413.709259,FALSE,-2.74583860679238,-5.21321863958213,"7"
22429.761719,-121.415108,299.831055,43.010448,260.486755,-124.10524,-30.212751,12155.578125,FALSE,-34.4033019528745,-41.6633704422884,"5"
1689.181763,-158.171051,101.025467,-70.519157,529.154541,105.911003,-9.674413,2635.761475,FALSE,-14.0329068436295,20.7144685323729,"36"
2401.818359,-143.10199,180.706757,105.487762,-88.148933,43.44883,-22.338648,6857.614258,FALSE,-32.9702030427559,7.03671166543853,"25"
-79.068771,-246.74234,-16.294006,-66.415428,905.589355,839.275146,30.617485,277.212738,FALSE,-7.73908122344743,1.84690161865443,"31"
517.220825,-200.294678,227.167801,674.948547,1027.009888,138.050507,-14.450406,907.793945,FALSE,13.1703276650336,7.74536982407626,"29"
196.758987,9.311387,116.696907,870.585388,1029.283569,30.115719,94.014,97.630478,FALSE,15.2515617579911,7.90849430297496,"29"
454.710663,272.488464,329.824371,144.015045,245.272003,357.467957,57.221775,9192.045898,FALSE,-30.8689562941206,-0.824892465237813,"25"
1149.087769,153.460373,132.373672,186.973206,651.03772,442.824829,30.690001,2597.20166,FALSE,-10.7082177280188,11.4997560122867,"8"
197.254333,124.56514,212.071655,146.881729,40.671593,129.790024,54.32893,278.796906,FALSE,11.210640209182,39.0617241121024,"28"
-153.574905,170.165863,145.203552,590.081726,326.617584,244.239716,-43.706009,7643.277832,FALSE,-28.1259968181548,3.81908309386064,"25"
1058.242676,96.421738,198.846741,123.549965,-133.043869,-12.701712,50.288815,4296.217285,FALSE,-26.704090231451,25.227527352108,"10"
842.854309,48.149975,278.850525,153.151794,0.797216,114.586075,43.277058,4689.577637,FALSE,-28.4974804570252,25.5335406561451,"10"
123.549164,85.199043,225.408813,357.019836,688.612793,193.8564,34.635159,559.597473,FALSE,12.2532962978024,14.3224894527172,"29"
663.698853,124.08596,165.568253,59.034645,162.896164,288.297607,-22.622341,121.152,FALSE,9.71636875639389,25.7819152218085,"20"
2384.830566,86.146355,243.531967,-16.856991,289.969452,-11.571909,107.44902,10601.826172,FALSE,-41.5856598813601,-4.75006719962237,"27"
398.044434,165.315643,101.284668,354.072876,593.136292,268.539429,53.701588,598.238342,FALSE,9.719107468908,15.3599544740561,"20"
22195.462891,124.275429,129.524841,8037.447266,3043.539063,-5.546809,-40.032665,804.000305,FALSE,-5.62905096141198,-44.1465442851181,"1"
1410.816406,109.442169,198.781357,74.164658,207.54657,169.064499,21.933537,8120.477051,FALSE,-33.4930488953552,11.5562498293987,"25"
413.724701,38.546989,239.572327,175.473083,431.400604,954.092651,66.335014,266.042114,FALSE,-11.2007698873944,-0.882694837361655,"31"
168.005432,-13.7162,180.286591,38.132481,850.199829,1595.718506,20.324047,6504.14502,FALSE,-21.1991509888499,-34.5535835561054,"18"
1411.109985,360.562012,308.245941,947.522644,115.41655,559.540894,176.46022,4295.088867,FALSE,-15.4457805151556,12.564711337273,"36"
12648.233398,188.222504,186.694351,5583.050293,2734.92749,63.643913,5.639873,379.215057,FALSE,-0.653017765010479,-44.0316834949849,"2"
70.396637,50.262001,357.985199,257.078522,380.436615,439.557648,117.892548,10406.568359,FALSE,-32.0206148882337,-5.83136147313891,"25"
225.371292,85.279297,134.256653,-18.35918,781.971313,258.833282,17.271696,240.418884,FALSE,9.46123145030952,14.5082191885547,"20"
6891.435059,149.008499,237.730103,115.322044,72.65493,394.530853,34.688435,734.363403,FALSE,-35.1667535057111,-32.2283467341803,"38"
5892.46582,53.254414,205.562622,122.848564,42.596832,42.536221,62.482384,10566.222656,FALSE,-42.234984759031,-21.7111403411396,"27"
1215.139893,75.20858,233.992401,70.625153,216.116425,111.971825,58.333157,3020.725586,FALSE,-19.2684789986766,27.251344199839,"36"
1506.956055,154.147568,208.783554,67.396469,143.878937,53.815037,7.436199,8577.790039,FALSE,-35.7066332767975,11.1584778330163,"25"
5388.674316,11.585249,201.099243,107.16832,101.683838,72.144753,89.673164,10496.015625,FALSE,-42.8178256435438,-20.2066665921577,"27"
108.582596,138.754028,182.731628,361.684662,1467.178833,538.732727,15.39348,2769.087158,FALSE,-6.97717881923144,-3.46943521255818,"8"
7867.359375,77.710983,161.488876,1072.064575,1879.765503,191.610977,40.150463,66.667206,FALSE,8.29333420681591,-47.6019460409744,"2"
163.73439,131.186447,215.475739,1066.634521,621.759399,110.851868,64.001823,745.177734,FALSE,18.1146237234673,12.7769111606718,"29"
862.362,161.913147,418.728577,117.718933,151.307861,138.753036,35.174767,8274.868164,FALSE,-35.1753792854618,12.3113430870253,"25"
453.917358,185.239792,95.651764,151.379822,680.393372,198.050552,-5.534347,1278.444336,FALSE,7.11705869001494,14.7245668164909,"29"
416.645782,127.573204,196.167206,313.064911,175.923035,202.595154,79.77478,1843.772217,FALSE,-14.8080812182272,39.1229513729832,"28"
438.881714,156.170319,162.723862,13.413142,474.206604,560.42572,100.041878,146.349228,FALSE,-3.38586629924206,12.9036798474324,"20"
6540.229492,157.995483,207.880829,3782.30249,2419.439209,-6.62777,16.652418,213.567841,FALSE,27.083011816094,-35.7259504510938,"2"
52.114201,230.592087,159.609344,433.992249,803.360657,158.409027,58.92284,4106.010742,FALSE,-13.3116006722769,5.41880592348672,"10"
1634.893555,220.359329,268.7211,171.238785,115.763496,186.711319,97.305656,4971.640137,FALSE,-24.5270706356165,19.5755124389506,"36"
-81.430069,96.658768,156.929626,229.034103,404.063538,29.932699,81.671883,981.87854,FALSE,7.04931349335812,30.1085829241777,"28"
-383.715332,78.006218,217.005905,130.339569,159.472351,55.996941,-48.872604,-310.869965,FALSE,21.2236716512196,26.5923851987848,"28"
153.565689,143.343933,336.631348,69.527443,2.819731,163.355637,156.910599,610.615845,FALSE,-4.13844067958503,47.9864558743284,"19"
1613.863037,130.652878,193.950882,500.530518,176.823486,99.89415,45.216545,5701.029785,FALSE,-30.0095922920815,20.110220659959,"36"
1199.038086,101.286423,136.572006,150.27803,200.986786,60.104153,76.762054,10819.666016,FALSE,-38.5795442460355,0.569128464734176,"27"
451.46637,146.124939,270.006683,2344.760498,1430.177246,312.382629,263.16391,2606.022461,FALSE,6.07936283771504,-2.93489677399498,"24"
2060.75,-45.727512,118.689232,183.864197,1005.139709,171.628784,8.731013,8077.90332,FALSE,-28.3106730694633,-3.93790014860328,"25"
9363.703125,78.222801,172.22348,2244.013428,1535.869507,19.840683,-24.624828,-117.264603,FALSE,3.0166359468736,-48.1767118996657,"2"
258.175659,116.588287,213.19426,602.680969,949.656616,326.935577,86.827568,2351.619629,FALSE,-2.20478127210485,5.35532679540846,"29"
10572.540039,142.140335,199.405304,2733.693115,1605.28833,9.471754,15.896274,82.173729,FALSE,0.531752423163774,-47.4051354818428,"2"
-27.917046,123.010582,209.335739,311.848877,844.304382,591.855042,21.192522,132.225723,FALSE,-2.46363559260178,7.67308131036358,"20"
1592.699951,152.025375,389.467834,94.481667,44.697491,137.916504,75.154953,16310.202148,FALSE,-47.7036653463185,-1.10426682418693,"23"
14904.897461,170.091202,222.597321,2607.916016,1979.588623,-20.357775,100.416946,-181.150452,FALSE,-4.95409295338587,-45.7282409197338,"2"
65.60025,106.093124,232.728439,427.199677,383.549072,213.319077,46.811348,2055.242676,FALSE,-6.44265309893345,21.459800165595,"28"
5.626242,77.459412,129.843063,188.505859,124.405815,167.988831,-6.156626,152.087769,FALSE,17.1012417503702,30.6206815250409,"20"
621.730957,162.259674,169.878677,511.079865,982.761963,489.553894,34.982506,985.472046,FALSE,-0.428471111960436,7.49605216176976,"8"
1456.836792,104.345314,130.136398,773.861572,1480.48645,89.694054,35.496826,817.362854,FALSE,11.6724700668592,-1.74680034349314,"29"
308.501831,129.775528,194.984512,781.816467,941.327271,96.244125,25.979555,57.638969,FALSE,17.517426198052,10.5506536408582,"29"
3035.303223,138.678558,285.584961,198.60524,92.796791,-6.386288,19.324539,8867.500977,FALSE,-37.8603138548346,-8.31608617757852,"27"
1155.611816,166.566071,239.101791,74.923912,27.628723,418.810059,57.027428,-117.901894,FALSE,-1.10024760246285,21.8190497074574,"20"
4955.775391,167.110184,260.471924,130.594467,67.242516,513.820618,25.354576,697.839844,FALSE,-30.5703103928374,-21.2055580711498,"38"
212.516861,94.051437,228.418274,246.156372,-31.296072,134.877197,11.740336,4716.674316,TRUE,-27.3891595808403,25.6761899917075,"10"
17886.724609,83.211136,145.213547,1578.177734,1645.754272,41.220173,-4.637956,-540.967773,FALSE,-8.33942175240878,-45.2055813374658,"1"
5268.453125,190.776794,238.930435,162.349045,127.490433,65.717262,113.021309,6383.335938,FALSE,-37.8541714329386,-22.9877034761938,"27"
5309.94043,138.803528,135.241043,2158.074219,2195.498047,163.96402,45.897358,712.645081,FALSE,30.7366580672442,-34.8181513635848,"12"
531.841858,230.220215,474.900909,609.653748,2110.641602,1046.704102,116.383759,14746.642578,FALSE,-28.1111833729691,-20.7898713847058,"21"
3762.214111,-9.264389,298.522461,163.157516,86.652458,275.725067,-6.218658,3288.096924,FALSE,-26.6816151056635,-3.59130840755877,"36"
2684.428711,153.531723,254.591064,61.539833,259.6091,61.100227,56.731731,16866.767578,FALSE,-49.8324707255977,-3.0458197907521,"23"
-25.700096,107.552094,227.723083,590.396362,1194.754761,111.473572,52.749565,472.532135,FALSE,10.2953467558253,5.16404038332726,"29"
1187.140503,124.986618,266.705414,120.604843,-98.182121,123.917107,84.717865,7509.705078,FALSE,-34.2624876524616,16.7063997520006,"25"
12526.262695,32.643482,152.24411,1653.685303,1266.260376,14.012503,-34.79771,410.418518,FALSE,-5.34808670224009,-47.2336042194296,"2"
-119.306892,164.101242,289.576385,184.307281,408.313263,431.421021,-19.188311,2634.095459,FALSE,-9.51607410502385,11.5047535470895,"8"
2987.594482,80.59491,219.656723,679.161194,1231.266602,94.831444,37.009975,4211.783691,FALSE,-11.6777834996207,-8.66749993628205,"36"
-45.126102,70.082733,307.165375,167.845749,155.516052,244.443497,64.775604,6175.532227,FALSE,-32.3777424279513,21.7733791467356,"25"
1072.510132,78.277077,273.061279,121.975739,95.289574,77.503746,90.401978,4473.494629,FALSE,-26.9121355695378,24.6844778620704,"10"
14833.201172,83.745613,189.228333,73.006577,131.16275,-4.690489,83.767761,16499.585938,TRUE,-36.3639536570122,-38.3962108226309,"5"
9233.25293,71.123116,98.175385,1647.137085,1140.335815,93.642479,-19.100636,-541.027588,FALSE,2.60566165209519,-48.5351404638317,"2"
3713.050537,231.180344,201.031189,132.423843,-27.979115,55.462254,55.424377,7932.329102,FALSE,-39.4926833014312,-14.2981901918716,"27"
7097.110352,129.036682,180.321136,2226.784912,1222.477417,-14.515046,-27.084362,-78.991211,FALSE,24.0680852152046,-39.3001703502851,"2"
8816.703125,130.137985,101.648598,1744.910278,1500.21875,1.307384,-11.991482,-96.256744,FALSE,4.49289690390104,-48.9070887436056,"2"
231.458923,91.541962,119.545891,-0.173737,429.377136,1059.031006,-9.613948,2732.289063,FALSE,-14.817689077113,-12.6023080729727,"31"
8338.633789,287.996857,205.057724,3298.457031,2588.41626,69.240105,7.91122,536.103699,FALSE,10.2646881093621,-45.9190104147346,"2"
-132.182068,128.88829,250.899582,211.766922,-118.819618,309.95047,-3.846762,10847.587891,FALSE,-32.8546221619021,-3.91126718176422,"25"
226.735764,91.225395,133.041153,-41.163368,377.159119,335.675659,20.292589,-137.351868,FALSE,6.99232664077917,20.7879178325624,"20"
4280.634277,-1.888073,174.124603,40.419342,30.174984,85.471771,-41.599998,11372.966797,FALSE,-43.5659162376398,-14.7052090843392,"27"
175.631317,223.941452,402.611359,99.053886,26.040436,146.993256,67.736908,965.572754,FALSE,-3.22692653292471,42.9346024650795,"28"
1655.430542,239.165146,117.833572,95.164711,145.114151,28.872694,118.11618,5255.458496,FALSE,-26.1227327896629,17.7821563868418,"10"
-29.911333,178.036728,210.300705,16.270645,218.553177,682.524475,53.341843,-114.16803,FALSE,-2.80037587140921,10.3471545437065,"31"
-71.329887,218.200195,188.439255,42.073204,242.921417,144.580734,52.982563,6131.225098,FALSE,-33.3591799360178,23.9652833429387,"10"
-11.892452,8.52354,293.78302,47.17551,888.632568,912.819092,49.535454,3440.876953,FALSE,-13.874393367648,-8.17201116714755,"8"
591.288452,138.527832,225.674759,140.424271,121.348175,95.403824,-9.288007,10405.430664,FALSE,-35.8057725352839,0.241932016073876,"4"
-85.871727,79.578773,109.106125,319.39917,1106.757813,259.53537,108.923096,471.622284,FALSE,6.28577784774907,7.32057635180723,"29"
87.478256,84.381844,268.290131,100.942612,1587.585815,1117.737671,38.28307,5996.593262,FALSE,-20.1694739838786,-26.312100762586,"8"
3237.75,185.236496,120.054771,237.02121,-387.724304,246.269745,103.457146,755.520813,FALSE,-23.7608849596143,7.54788963824346,"36"
36.108013,-7.85018,140.598419,140.621979,1447.321777,1333.050781,0.317862,2544.669922,FALSE,-17.5557076192889,-32.2352057496061,"8"
315.206787,30.545488,250.751602,180.451813,1040.000977,1051.272583,2.664549,9760.202148,FALSE,-23.972581406326,-22.9030187413175,"21"
910.212219,57.760384,221.465836,333.186493,263.451965,187.401733,16.710121,970.276733,FALSE,6.65876638385281,27.1049311795682,"16"
3331.859375,138.118042,231.396332,88.974083,247.810669,84.140709,53.689789,9142.040039,FALSE,-40.0195778425448,-12.4200509626005,"27"
9510.485352,163.554626,242.668854,161.856049,140.067871,54.341415,141.840073,4559.759766,FALSE,-34.1553435600298,-34.708364578481,"5"
3988.943115,90.754753,193.806137,154.545898,-49.238525,0.960821,4.672081,7551.817871,FALSE,-37.1061862473036,-15.7916004545011,"27"
721.861694,270.87088,305.308228,447.161896,1592.647095,1682.792847,30.983244,15296.811523,FALSE,-28.33420912492,-27.4723902881829,"21"
-51.199593,82.994507,177.509033,63.383583,121.958199,1155.831177,21.124884,68.286522,FALSE,-13.4614623247441,-11.7196948274167,"31"
50.160328,288.451141,183.541489,189.458115,1027.651611,668.709106,20.830961,717.180725,FALSE,-4.3810335243978,4.25084711770095,"8"
1182.832642,285.621735,267.018219,426.442749,49.710754,225.99762,84.751678,4847.303223,FALSE,-28.7478949357392,26.4594256645893,"10"
989.02832,158.872772,109.211693,101.547997,70.842979,42.640064,111.308891,17429.546875,FALSE,-47.5147380070684,1.65971958017365,"23"
512.142273,157.745972,202.696442,95.723137,17.521137,21.853987,63.764362,1149.686768,FALSE,-2.98923764940112,40.6389414811097,"28"
10577.258789,184.367538,147.543274,227.95668,-66.049469,723.222473,9.793523,4731.758789,FALSE,-32.6026594067082,-32.5661284574819,"5"
662.456726,169.697952,259.604614,102.647293,-16.41135,161.852524,153.335632,8056.333984,FALSE,-40.0423339033676,21.4632097952793,"25"
2097.355957,171.094589,208.960831,32.033619,92.142929,9.211636,71.468353,4130.657715,FALSE,-22.7198364823784,17.1821957153095,"36"
765.376587,163.676727,134.517868,879.369019,607.075439,60.809238,69.285713,267.490143,FALSE,20.0395427083452,11.4402124719054,"15"
647.264404,110.633972,165.627426,474.066101,653.350891,126.877449,21.475168,31.9182,FALSE,18.490564383881,14.735943067638,"29"
207.240631,103.850471,202.470062,232.738617,423.235535,173.793228,-31.393461,611.115356,FALSE,15.0985068850343,21.0422078069537,"29"
6745.273926,134.383881,242.996857,2065.707764,1997.070679,-4.05701,95.807877,172.27504,FALSE,22.7028589081478,-40.8273920482898,"2"
755.452148,221.550308,207.815033,161.861313,-210.70929,-47.781029,-3.460764,731.434387,FALSE,4.77328492233112,32.9385415802662,"16"
1052.882324,121.203415,226.60463,717.709045,1446.706299,143.11499,-27.545986,1511.078125,FALSE,8.50112784137716,-0.548229444141555,"29"
6636.370117,67.409981,137.007904,217.571243,380.995514,352.173737,43.341965,1498.657349,FALSE,-31.6249867580013,-31.956374444738,"38"
208.884537,52.046478,286.890686,171.659698,798.542664,1081.487305,52.569561,2818.470215,FALSE,-15.7734741771667,-15.0101944857659,"8"
1895.25415,124.037773,285.994263,89.42054,69.63047,178.546051,17.968763,9268.270508,FALSE,-35.4592968961757,3.70967251885712,"25"
65.117493,174.48082,227.18309,220.878632,828.070251,248.737015,45.647148,321.060577,FALSE,9.70561746100074,12.6961209288692,"29"
14342.885742,169.910385,162.323685,3416.799561,1918.480469,69.056046,27.728374,576.067566,TRUE,-3.07489859445836,-43.9593992351868,"2"
16769.855469,103.86631,190.047043,1290.987305,1397.251709,-65.533958,31.168983,3671.335938,FALSE,-4.69752250442567,-48.2594103956875,"5"
1360.039429,206.238235,390.351929,93.743996,243.240829,101.622833,95.088158,9226.511719,FALSE,-37.1540151884049,8.44907655296691,"25"
-83.516876,97.322136,184.138123,228.063965,463.221497,17.206434,43.982368,1311.30835,FALSE,6.86643701344498,24.5591766726913,"28"
29.055061,137.473755,267.622803,158.911896,1674.719849,1087.904419,-8.875,5815.465332,FALSE,-18.8457586637486,-26.1476000411255,"8"
480.190521,190.261749,317.902039,400.788696,741.395996,241.429535,7.001689,8989.944336,FALSE,-28.5598443317878,-4.97009237301515,"25"
294.434265,163.152603,225.068375,177.388474,1072.360474,1885.535889,3.237553,2093.91333,FALSE,-22.12900895145,-41.2393598664125,"18"
831.991333,123.411858,167.978867,97.325592,388.676117,716.634399,57.072807,615.170166,TRUE,-2.92615053359026,14.9138646111217,"31"
100.156441,102.771286,282.508362,187.198837,1207.805908,121.977264,116.369431,5887.454102,FALSE,-18.9520332617012,-1.81820054055534,"25"
-24.182398,186.741089,114.092522,523.54657,1057.14563,254.323212,42.061069,7649.492676,FALSE,-21.2762016283452,-8.13697583853861,"25"
1065.504761,57.208416,180.36058,130.268814,-52.098408,54.30555,49.520382,910.980835,FALSE,4.02176651744751,33.8598091777434,"16"
155.97438,107.127121,318.003265,194.206009,847.630859,434.244354,105.168465,4904.982422,FALSE,-15.4501845252282,1.64960299257907,"8"
10165.769531,49.601788,165.235626,4693.238281,2075.256592,-131.443771,-44.612808,-759.762268,TRUE,1.35884024801288,-43.2122525666769,"2"
408.994263,-81.426575,268.576813,87.443825,1081.912476,479.912567,-81.540001,3286.393799,FALSE,-11.0996935118234,0.625950433714856,"8"
79.671837,131.398117,219.584793,523.656494,598.850464,1723.328003,11.483329,6107.98291,FALSE,-22.909268419523,-36.4207870029729,"18"
213.665573,49.816795,242.180817,105.84613,82.575005,416.761658,42.424271,12044.110352,FALSE,-34.3011530942358,-8.80406434961365,"25"
138.11087,106.605812,202.499969,1712.820313,1956.112671,87.750626,17.793049,3958.206543,FALSE,-5.9728765808636,-11.1799570574278,"17"
655.315979,107.127052,216.934814,95.602905,192.743835,246.31485,-10.038331,962.388916,FALSE,2.87726980948759,27.3142673478103,"20"
82.695961,73.154282,252.595184,92.487793,528.686462,861.067322,19.408243,202.757233,FALSE,-8.27136002974773,2.96164685009346,"31"
50.531399,18.68285,179.4086,945.456665,1216.305664,72.757904,30.645853,984.131714,FALSE,11.6839368397283,4.78394904351154,"29"
3862.716553,165.153687,249.114029,143.428604,12.892508,155.71199,17.375238,6962.958008,FALSE,-36.1235333543013,-14.4032308783517,"27"
1286.019775,36.111618,153.665543,119.377831,191.200989,193.774857,23.692041,1051.78479,FALSE,1.01848164316404,29.6002590631894,"16"
174.414871,56.003708,104.10981,349.161896,742.090942,1527.788574,-10.119555,4345.263184,FALSE,-21.7334672253762,-36.624778131137,"18"
17044.046875,145.914444,183.474167,2000.52124,1780.686157,57.582195,-4.391656,-177.521149,FALSE,-7.15462514299818,-45.1714458466376,"1"
735.217773,70.92421,148.209427,1089.799927,529.570313,85.955208,1.685726,40.0229,FALSE,21.9595357998296,9.5914824230258,"15"
15695.763672,-13.997597,49.379055,2166.442139,1809.548828,38.000538,-1.519272,538.24585,FALSE,-5.5860183626351,-46.5068894154297,"2"
19733.236328,141.514999,208.44928,1878.334106,883.087891,-157.972183,48.268299,503.019012,FALSE,-8.21174910491084,-47.6136640773624,"1"
2769.094727,61.439377,204.901428,77.328651,-1.927853,22.969732,44.254272,11222.332031,FALSE,-43.5022882971436,-10.5464409241379,"27"
28.299923,77.34362,260.462555,143.581833,53.636944,19.857365,31.585835,12306.012695,FALSE,-38.9079836045747,-1.13819428087969,"4"
259.844666,70.151169,179.787552,724.41394,1565.558228,268.799561,-0.042311,255.867554,FALSE,6.8643075037844,0.185466827668429,"29"
284.207275,105.425865,227.061188,321.793976,151.589996,180.094894,-29.941542,-40.082882,FALSE,17.4990561127729,26.1905472942436,"20"
6947.271484,70.669312,258.190247,116.700432,-1.08248,-60.577248,16.751175,14941.424805,FALSE,-45.722038767755,-20.5472358795871,"23"
3507.008057,112.728905,256.980865,169.679306,-76.866661,-34.056694,-15.709601,8866.700195,FALSE,-38.851061246417,-12.7822644977209,"27"
18812.099609,109.646446,117.000519,3106.52417,1531.818481,-86.387558,2.955152,680.351746,FALSE,-8.29109220142195,-47.1535751233761,"1"
9972.681641,219.870117,277.442291,102.663742,36.408997,-27.649033,-49.166698,11261.617188,FALSE,-40.4952155959937,-31.9893680718603,"5"
9857.279297,151.83429,216.296005,1237.662109,1368.110962,-34.173035,80.49337,709.875671,FALSE,-1.20309897884109,-48.9406934765308,"2"
1115.009155,-0.207802,52.16177,303.626892,1500.049561,1452.463867,-22.010277,1957.480713,FALSE,-21.5594053469535,-34.1641477912261,"8"
8336.923828,57.780281,29.227802,1032.951904,1904.991333,-27.53223,18.846832,848.453796,FALSE,5.85554430194274,-47.6640351988414,"2"
464.969482,1.228344,161.565292,426.513306,1093.504395,63.358475,78.556129,451.034363,FALSE,10.9995673554154,7.44634306338815,"29"
-250.226288,147.495865,165.951828,628.675293,1490.820557,68.026718,122.834534,956.682617,FALSE,6.86424786837004,0.754709428600469,"29"
6781.168457,232.163956,351.169861,306.163239,65.460785,53.549129,129.213135,9334.22168,FALSE,-38.1036352445869,-25.9594295243288,"5"
2130.73877,203.320206,166.716858,321.658875,922.726318,178.858322,91.670364,1186.188721,FALSE,8.57636800112465,8.86725280975393,"15"
209.998138,185.277283,166.121429,231.705231,90.393539,361.540375,85.20034,793.462585,FALSE,1.53120306695046,20.4116395953115,"20"
23.34074,3.997701,171.845963,502.166199,673.748352,91.804695,39.044106,76.223152,FALSE,17.1846712714066,15.1065255538647,"29"
359.30072,-4.413987,220.121597,616.233582,383.854095,203.24884,-32.58638,1497.655884,FALSE,9.32162567013775,14.7332615858348,"29"
78.993027,83.801888,215.306763,83.235039,109.631195,1362.47583,156.875107,2340.003418,FALSE,-17.751265261685,-26.1607977220406,"31"
-9.759114,94.790176,210.101196,1131.700806,2456.512939,106.953949,-0.811016,23.859554,FALSE,8.3902926817425,-11.8952482502784,"17"
718.907898,136.529541,244.898224,82.941162,124.05584,73.183685,165.407715,12274.40625,FALSE,-41.1120052466007,0.888446789148561,"4"
658.132141,187.421616,345.425049,398.977478,1413.506348,152.286179,142.759323,8.300748,FALSE,8.22002247130719,3.45815168234139,"29"
1159.784546,141.880203,231.088623,159.347916,146.046616,458.263367,60.620636,8498.56543,FALSE,-27.6082413739545,0.32052626674484,"25"
-159.366196,74.29335,97.89724,1699.135498,1746.678711,59.046272,-2.460825,-487.223114,FALSE,17.1146076716726,-0.949105547306732,"17"
3730.736328,213.397339,330.810181,45.751282,69.668983,1103.0354,-17.291759,3622.53833,FALSE,-17.196556162092,-6.82627618782399,"31"
194.075195,103.575653,175.662292,656.438721,865.894287,68.941483,55.1362,3679.8479,FALSE,-9.94367973499785,5.2802079931153,"29"
1343.007813,137.666916,314.713959,362.370422,777.23938,795.452087,64.454597,2141.48291,FALSE,-12.5176768920486,2.36967158024295,"8"
307.809448,236.407394,191.15094,95.538094,87.137703,-11.614282,2.858104,1584.283203,FALSE,-7.47054765702964,36.806030495823,"28"
362.007294,167.070923,221.872986,300.652466,-26.904352,409.406403,47.032722,1817.462891,FALSE,-5.60356838144803,17.9354747820827,"20"
1246.617554,146.583801,157.258865,85.665581,729.658569,-44.822685,97.285637,-101.214767,FALSE,12.2439460931922,15.6420836442991,"16"
21377.080078,162.975601,132.126068,3086.074707,1983.053467,-174.379196,-61.248375,133.181427,FALSE,-9.27256853676426,-45.1830753878165,"1"
1727.309082,63.463631,313.410278,-5.014175,57.037853,902.256592,177.056366,3151.098877,FALSE,-14.5840914143368,1.01968180011096,"26"
969.056824,300.664276,326.850433,115.987419,71.43119,74.130173,37.059986,2420.99585,FALSE,-17.0324107893186,31.9105220937599,"28"
3962.441895,195.070175,218.525131,108.161064,301.171936,305.357544,107.530479,3698.412354,FALSE,-29.2909434366501,-6.41582964344821,"36"
16699.941406,93.817635,186.637833,1852.154297,2085.06543,-6.850325,-17.780373,260.843903,FALSE,-5.9009569010363,-45.0065081469707,"1"
-181.55101,36.73151,159.246918,175.763336,74.308342,165.690582,-40.292103,1988.69519,FALSE,-7.3074857366262,33.2788891923609,"28"
13765.130859,168.859131,349.921082,68.160545,306.69574,4.595729,157.082245,8559.539063,FALSE,-34.6577205332872,-37.3979600409419,"5"
175.115906,34.51667,191.873734,110.776665,376.424347,325.793823,67.765091,5.767131,FALSE,7.58550250152866,19.6685476646565,"20"
382.731812,181.0186,308.409515,104.914497,66.870888,118.799957,221.616653,-90.824615,FALSE,-4.34861766930736,44.3780288000796,"19"
323.62674,116.75106,242.632004,190.307892,68.472862,178.054306,-27.404095,12195.021484,FALSE,-37.0818560044718,-3.7560166055241,"4"
-62.036018,145.600586,183.51268,120.98616,493.738617,951.33551,42.126171,416.526703,FALSE,-9.8693481649624,-0.989366797945594,"31"
19582.259766,268.840607,169.974655,2228.087646,2208.572998,-102.998878,114.310402,-178.120758,FALSE,-8.95726069701143,-45.0830558533045,"1"
-100.263351,195.114944,348.266235,302.508331,255.681259,392.974823,32.020584,9687.31543,FALSE,-29.996475800058,-5.05679510849711,"25"
133.851089,78.545059,151.144012,292.681213,1688.334351,1758.009155,12.944591,6951.407715,FALSE,-19.4014088956092,-35.0670105907057,"18"
7672.285645,59.071499,174.961411,3635.411865,2155.764893,61.745884,73.146194,161.221146,FALSE,16.68226921718,-43.303775891955,"2"
4401.967773,45.124031,230.742798,91.196007,216.290482,186.794876,60.594944,11573.913086,FALSE,-45.0670485409642,-15.7873487899062,"27"
25.510366,82.162331,204.317505,29.091177,1162.347168,1369.994507,53.706726,3660.776123,FALSE,-19.195141958335,-33.1701985946929,"8"
534.834167,82.345757,256.199066,74.48761,174.104385,35.173622,47.275692,10395.322266,FALSE,-37.4878445087914,1.87588338697404,"25"
630.878967,233.138367,169.642365,824.446838,-1.23751,350.794128,78.543411,155.062897,FALSE,9.70505996163664,24.3186735189423,"20"
14687.553711,78.558418,217.151947,2591.698242,2325.475342,-128.981613,104.811005,-360.945343,FALSE,-2.79944872421467,-46.2056713227072,"2"
23506.466797,199.591583,215.531403,108.845757,45.368511,-15.344216,140.458511,1469.615845,FALSE,-18.223296403693,-39.7113302543174,"5"
260.760803,122.539093,192.585419,493.731171,1344.258911,112.234695,47.392624,296.623505,FALSE,10.0853260863896,3.23178088436091,"29"
656.289856,141.345947,256.845123,1664.800537,356.279388,32.909992,35.537491,3798.802979,FALSE,-1.83363646574426,2.62410396630621,"10"
-10.770071,183.737122,140.234116,433.8367,970.068054,165.142273,55.028572,1009.358948,FALSE,8.97737772951415,7.98894659852244,"29"
3412.587891,137.879745,74.579872,60.516636,229.23996,111.429192,77.041016,5352.043945,FALSE,-31.8494957506599,-2.03097782685381,"36"
-67.275642,105.68293,142.196442,227.430023,518.184875,126.129913,17.582304,420.693329,FALSE,14.8743151210397,18.1629794537819,"29"
16903.285156,165.408661,200.49559,2732.67627,1893.160522,71.448723,59.260048,658.638611,FALSE,-5.4771333549679,-46.0006614059094,"1"
-1.345766,94.976822,137.524536,785.328247,1687.167114,139.727921,72.451416,382.706329,FALSE,7.67021186795576,-1.30036879455364,"29"
252.952209,117.319824,402.632416,979.11908,130.885712,-18.484396,49.689205,293.922455,FALSE,21.0389972104866,17.656759814843,"29"
20130.675781,204.124771,130.224884,4257.12793,2305.15625,-90.484421,56.696857,-424.062408,FALSE,-7.41388109742221,-44.4556254931137,"1"
1054.4104,136.025436,332.413025,144.8629,111.406555,4.774937,28.776163,6881.638184,FALSE,-32.815829180591,18.039282991278,"25"
3701.648193,187.31456,471.083496,100.785332,50.428188,22.582354,30.951542,6476.607422,FALSE,-36.3686430560392,-12.3443087799207,"27"
4184.553223,113.171028,159.633026,151.97879,263.295868,106.764648,-9.523866,1139.130493,FALSE,-23.7650078405821,-16.912096402564,"36"
26.087484,77.042236,152.392334,66.196754,994.472168,1332.028442,16.807287,8075.246094,FALSE,-23.1183987859056,-29.4619566625193,"21"
369.315247,48.231983,192.096527,125.140411,1754.71936,2454.860596,42.776283,2994.77417,FALSE,-21.1406841281777,-42.2412105495298,"18"
-182.317932,95.461586,210.341171,123.533806,792.633362,85.471519,71.154655,676.354309,FALSE,10.5756930722072,13.6697505758224,"29"
238.224213,118.925697,125.550728,777.554688,1728.612183,208.121597,296.286407,229.161316,FALSE,3.66098818210591,-0.548304876880326,"24"
1096.216553,72.330276,144.421371,451.365692,2011.175415,112.392113,144.510361,313.701935,FALSE,5.37641193680801,-7.51658181753836,"29"
591.153809,109.465088,132.395065,260.988037,716.50238,37.762585,-6.976744,-172.591568,FALSE,18.8463549406865,14.1544546301645,"29"
740.542542,148.903336,167.623657,478.888611,425.519043,108.31617,17.046385,452.949127,FALSE,18.9592104509396,18.5175214089619,"29"
1533.311646,-16.321482,254.635071,49.881107,192.523804,116.966835,21.827608,9070.959961,FALSE,-35.7233117925015,7.95792671820077,"25"
291.020264,143.054474,272.641296,198.670303,726.884766,815.177246,83.198479,-86.336807,FALSE,-7.9049533167331,3.84470884522583,"31"
10331.545898,2.383073,130.916122,1668.147583,746.655823,-16.841473,14.417305,344.519073,FALSE,-1.57691117735016,-48.5292636167816,"2"
705.233765,137.444519,187.218658,143.527267,-151.488022,537.596191,66.552246,2642.490967,FALSE,-11.0327143627269,13.2791356239099,"20"
8762.364258,169.569717,129.524414,1282.492432,1336.871704,-81.728882,9.891302,91.781868,FALSE,4.15730036456829,-48.8077481222795,"2"
131.72229,176.483978,231.03833,345.190338,1097.425903,1613.915405,13.829392,3272.189453,FALSE,-21.3026346271209,-38.4154199609488,"18"
292.809784,155.259933,167.568512,775.962524,853.204712,160.514709,14.334113,307.745789,FALSE,16.7038181275316,11.8481260528795,"29"
120.555786,109.182442,204.800476,198.921417,-148.764374,240.782654,13.493439,1087.776123,FALSE,3.49221058813326,30.7543624660123,"20"
2628.553711,189.781418,208.953064,124.565613,193.665695,169.394241,-3.447788,1078.640747,FALSE,-13.2866955532241,17.0348605248083,"16"
18562.107422,129.920059,51.33028,2026.015991,1331.78186,-83.704414,53.198498,66.789581,FALSE,-9.07867820687063,-47.1634980874822,"1"
324.297089,204.439713,258.904144,83.925301,123.748169,1581.562622,92.048744,1922.171265,FALSE,-20.1874156988075,-36.318798478527,"18"
544.793396,129.887543,334.054535,343.951935,733.810059,53.983898,20.33848,-225.420456,FALSE,19.3746889840474,14.4952939139439,"29"
6745.721191,53.282745,237.768021,2010.744141,1839.352417,-11.959608,20.35346,365.315857,FALSE,22.7579308355945,-40.3221445817938,"2"
1130.348022,233.25766,209.816544,95.360481,94.583359,76.584526,20.210112,7877.865723,FALSE,-34.65550216051,14.748448504357,"25"
548.598511,79.496078,205.745483,135.124069,299.776306,78.010101,0.170427,960.299805,FALSE,8.1505049442335,27.6265012046051,"28"
7827.826172,70.32399,185.644257,150.274078,911.77179,786.44989,84.134773,6668.379395,FALSE,-34.0733777819773,-28.6005839391099,"5"
7492.640625,42.904594,177.030411,1751.816162,1505.19873,90.402199,33.975796,359.755402,FALSE,10.7237289857416,-45.5463636064869,"2"
-32.492207,145.333725,286.911835,549.828247,193.264801,133.820099,1.501601,-3.089879,FALSE,20.8832878177247,22.1980806207344,"28"
7347.41748,102.402718,153.086487,3974.974365,2088.25708,-16.531134,35.040096,8.20796,FALSE,23.5714380598031,-39.2200015141976,"2"
3084.90625,104.151123,276.25647,84.694641,213.526505,82.907578,63.277142,11220.238281,FALSE,-43.9748918739257,-11.7480603898806,"27"
455.574188,110.267479,210.825592,372.223083,430.882721,223.366653,47.194599,295.211456,FALSE,14.5508729903165,21.4896085747849,"29"
70.353233,156.227524,178.204163,39.232426,932.618591,191.905502,-16.887503,-85.364021,FALSE,12.0383195987577,12.0968415635256,"29"
14648.616211,118.042305,145.272537,1292.17395,996.405762,-75.097656,14.852158,311.452606,FALSE,-6.88974585499017,-47.5211799233096,"2"
298.750732,168.510468,185.625717,458.207092,975.663269,316.298309,192.778702,456.025482,FALSE,5.37299201160462,9.44646531250501,"29"
9996.710938,91.562119,201.374771,1998.06604,1141.590454,31.199867,16.319557,126.950912,FALSE,-0.199594458543715,-48.1500358061858,"2"
1300.893677,117.318237,213.7043,72.485992,32.942318,300.5271,-24.4048,1186.72998,FALSE,-1.56698804400032,24.290840479252,"16"
7804.356445,56.441376,85.016891,1594.745483,1106.998779,2.312747,103.63736,88.518433,FALSE,11.2876296353421,-45.7871883174516,"2"
166.387314,171.891968,191.645721,57.348091,282.353058,752.028687,36.18922,225.800888,FALSE,-5.35180941974149,7.44510996337863,"31"
8338.892578,197.207687,327.413513,205.545517,204.970627,121.71727,69.547089,4271.316895,FALSE,-33.2276520751418,-31.3954038678245,"38"
308.872589,75.594398,188.036499,109.861946,150.799332,365.407684,47.000523,3094.377686,TRUE,-15.1015286725249,12.6512809355283,"10"
447.697388,149.907135,256.255371,915.922119,978.484253,75.602669,-30.200594,2919.171143,FALSE,-1.45185099948932,-0.64491415026873,"29"
1333.169556,202.189697,237.246384,141.983109,-90.603813,78.618614,-74.988487,9192.282227,FALSE,-35.1839862897164,6.78875079452794,"25"
14587.435547,97.293312,149.253189,1401.38208,1411.221191,-54.977329,45.467396,-164.453217,FALSE,-7.33399789787504,-47.2934089159962,"2"
8428.889648,242.142944,225.307693,217.378876,-61.174622,580.499207,21.04866,545.624939,FALSE,-31.6112945006396,-33.8264008142581,"38"
955.532715,174.023392,214.223602,52.807793,-108.234428,271.291992,56.720928,3960.32959,FALSE,-21.6049693896876,22.9927477641075,"10"
2417.114258,202.857437,316.442261,264.351563,-75.584534,77.07579,62.884254,20754.996094,FALSE,-51.4508490319496,2.95561654953369,"23"
315.094727,122.346001,241.651184,62.139137,222.074036,173.9776,-6.083962,11494.412109,FALSE,-35.4767943251753,-3.1229256585084,"25"
13443.831055,121.428078,83.586792,2513.860352,1759.590454,-90.393929,6.013956,-123.604301,FALSE,-2.90972932410085,-46.8919148970126,"2"
2771.122314,160.56189,213.227692,26.918205,144.490845,19.495201,36.978584,12363.859375,FALSE,-46.0776149941272,-9.20824888501745,"27"
28213.869141,57.322701,147.590424,2108.512939,1024.340332,-115.68689,-22.432552,-830.725769,FALSE,-10.6538231972015,-44.8283560108659,"1"
2792.690918,111.593437,234.668503,59.744442,48.841877,3.67097,180.754501,6590.83252,FALSE,-33.2925288709706,-0.9420082839356,"25"
508.859802,141.426178,287.762115,51.797119,272.098785,54.306038,40.174088,8978.202148,FALSE,-35.6456177003562,9.09820376643792,"25"
1401.19873,132.948318,256.125183,545.717346,1143.214233,224.36145,227.503983,1778.477539,FALSE,4.48842723051885,6.55952176635836,"29"
1448.572388,141.380676,212.218506,569.555176,540.412598,111.162315,59.759487,-77.54158,FALSE,16.3968530853747,16.0373631966487,"15"
79.424065,124.284523,105.471329,472.557892,199.62262,88.344246,97.17366,2433.324219,FALSE,-16.1147151359974,34.201620570045,"28"
407.072479,88.148911,160.972061,371.942139,1910.307251,129.934509,313.27655,291.894592,FALSE,2.05322568984398,-2.66867810169564,"24"
3962.55957,171.557159,188.100479,128.857712,11.667892,85.288162,-5.53385,7977.812012,FALSE,-38.4292772642317,-15.6900430798887,"27"
154.034271,65.672958,161.485428,504.077087,325.73642,362.127014,37.846622,590.659546,FALSE,6.60938939271926,16.7875393343585,"20"
427.612885,143.606857,260.992188,133.302261,165.792938,537.336548,6.669199,3453.400879,FALSE,-13.09337764536,9.86240318194967,"8"
153.161484,85.448006,191.592163,374.354523,1522.514038,1119.480225,36.392746,8033.406738,FALSE,-21.8967364614205,-26.0556098907311,"21"
1610.939087,94.696526,184.159012,470.646027,2032.743774,84.848007,457.968964,-25.737885,FALSE,3.81246284089151,-8.6157237478351,"24"
441.540863,236.274338,161.666306,413.745667,342.146179,395.330994,17.612991,3137.404541,FALSE,-12.9957594301821,13.7307137208361,"10"
832.172119,191.417664,152.476303,259.733002,90.991142,273.617432,79.918808,2895.302246,FALSE,-18.1668356054373,27.8859229370032,"10"
267.649567,85.817085,278.008453,526.554382,470.135254,45.937511,8.717455,1587.279785,FALSE,10.1079523870845,15.6771728485881,"29"
12224.799805,-8.685612,220.382324,2545.484863,1806.634888,-38.564167,1.039963,-393.292633,FALSE,-1.01168790167206,-47.1053437132316,"2"
9496.15918,150.760788,284.98468,2672.134766,2565.825439,44.809898,54.632553,114.154007,FALSE,6.80948040341956,-46.2928832930568,"2"
1967.735474,145.082779,349.016449,27.613859,-26.578466,150.302338,120.65313,9242.080078,FALSE,-37.4654319649056,3.23751011427393,"27"
261.504456,162.174866,193.152618,91.528702,219.85878,309.877319,114.086136,1691.968384,FALSE,-5.36271867692266,23.3027005756063,"20"
121.225037,117.213409,158.240082,208.605042,-24.530577,58.984509,-7.776679,637.695618,FALSE,15.8235016775863,33.1611121616445,"28"
10856.230469,43.568153,208.545242,3321.16748,1769.343018,22.696163,-1.554703,28.661392,FALSE,0.939528015354257,-46.8603889120302,"2"
110.241417,83.01722,233.31131,140.428131,1233.147705,696.110596,51.242641,224.938187,FALSE,-5.56696091569797,1.48711488931029,"31"
1829.842773,86.197533,221.107208,92.548431,-37.400761,4.26078,63.10387,5880.618164,FALSE,-29.1260300871042,16.9994623832176,"36"
1083.065063,33.554787,230.937744,31.873505,192.887985,197.966812,96.058907,4832.947266,FALSE,-26.545715222597,23.0973264674344,"10"
158.463669,105.021187,243.661758,195.769775,24.10013,528.197815,81.575546,8230.834961,FALSE,-26.4556150643965,-4.24637755474018,"25"
172.534042,166.169128,231.834366,408.42569,176.89827,23.130777,-8.416698,664.727173,FALSE,19.3102218193927,25.5095163363698,"28"
2670.550049,98.447769,222.489105,130.392929,31.585331,58.997726,-20.192984,3497.204346,FALSE,-22.3305677862251,12.7758218722929,"36"
-29.168026,143.835144,162.846649,183.618469,480.826599,662.960815,90.351936,-73.502876,TRUE,-1.81015641251104,16.3226548145022,"20"
10246.088867,99.47261,233.968918,1610.296387,1253.793213,-59.070629,39.738903,226.547379,FALSE,-1.42715480330245,-48.9546657051567,"2"
3550.399658,117.746902,366.272095,193.734146,-261.628754,81.736092,55.398098,12335.722656,TRUE,-46.3382486959293,-9.79425849262584,"23"
1319.127319,75.571663,264.068207,83.203125,168.503006,607.518555,26.857773,367.297089,FALSE,-8.20776647486494,13.037924669633,"20"
1199.055054,80.30307,283.036224,296.833618,5090.47168,356.390198,-20.203596,366.452759,FALSE,0.465104071602082,-31.083254382183,"22"
1092.932983,89.849915,317.486115,381.653229,1363.384277,72.472389,98.130997,242.18335,FALSE,9.47389870739879,3.39059445714749,"29"
12517.730469,100.814392,189.825455,1069.285767,1673.412354,-90.649948,87.67086,-604.28949,FALSE,-3.0963177607617,-48.4405928959847,"2"
6380.197754,111.338348,204.927017,737.649414,1729.546875,-48.012009,118.838493,614.492126,FALSE,19.7757841462256,-41.4329702361589,"2"
7975.128418,72.812965,144.358109,1899.899048,1404.271606,-13.334104,48.700459,-105.787857,FALSE,11.5760403149333,-46.0885506563823,"2"
-133.76358,175.299454,156.687164,675.441406,1215.26001,82.705452,20.560184,745.602173,FALSE,9.70047711677758,4.42258187953392,"29"
8598.587891,101.83477,250.175064,1049.262817,1135.439209,57.378269,25.759401,-95.489548,FALSE,3.58458117814,-48.3561102227402,"2"
730.938843,204.065063,210.051407,126.03978,223.253128,38.233055,115.120209,1261.068604,FALSE,-6.07318900736443,41.1740614488129,"28"
7.175197,264.821167,185.903152,119.881958,203.378693,108.085793,76.557076,8937.635742,FALSE,-37.3790576324781,12.4422266908567,"25"
11391.650391,111.372932,156.602661,1636.178955,1868.505859,15.610735,31.916964,310.193634,FALSE,-0.788948633158307,-46.8169136372538,"2"
6150.257813,252.297028,222.360092,97.390068,194.610504,454.704376,137.582047,525.597656,FALSE,-35.5859620183029,-28.9770572871078,"38"
10.535856,121.892548,169.6754,1126.467651,396.433807,169.327225,-39.786106,-14.295445,FALSE,20.5485754770509,14.6369601609101,"29"
833.546936,160.403091,177.953323,125.365158,99.924156,565.264954,116.339455,1788.84021,FALSE,-8.97052200478035,13.4996871345248,"20"
305.962158,121.878815,300.235504,177.885559,289.728973,137.479813,157.989273,2382.465088,FALSE,-18.4542516239975,38.4124305161074,"28"
345.079193,122.470886,191.606369,106.269554,700.22699,76.087006,18.626947,463.591095,FALSE,14.1932287510127,15.7124952498274,"29"
8545.300781,81.941856,174.700302,3218.854492,1942.424316,68.712967,6.228755,-285.192963,FALSE,8.49179730288609,-47.0608155612549,"2"
826.064819,151.440292,239.955399,121.964104,208.952789,84.800171,35.327862,7050.85791,FALSE,-33.38767973315,18.8201354669605,"25"
4623.831055,135.31044,276.876831,944.458862,836.219543,186.04364,9.472478,6792.343262,FALSE,-30.4720718073217,-20.6858792451857,"13"
118.667488,27.876404,188.932388,58.344887,544.642883,323.01944,37.024925,5428.34375,FALSE,-20.9396628305619,7.14071727394781,"8"
35492.484375,189.498077,243.586594,2840.246826,1946.771973,-220.82312,1.605424,298.684387,FALSE,-12.9232580938304,-43.8078718973837,"1"
82.78302,95.458794,263.95462,115.367027,192.32193,491.402252,-17.725977,3718.630615,FALSE,-14.0478952442801,9.40412548755822,"10"
8919.804688,117.461975,197.369476,2841.902344,2568.551514,85.909248,23.796827,-80.740021,FALSE,8.57618203183497,-46.6227935076009,"2"
2010.989258,99.150909,312.749054,119.260757,213.574432,89.817223,18.714556,16894.351563,FALSE,-48.6286146887231,-1.97123632662978,"23"
1154.506836,8.700654,124.628891,546.825378,1197.872925,140.439346,-68.060257,6681.268066,FALSE,-22.4026500663435,-5.38784035494446,"25"
1988.07251,121.266594,235.469147,539.84259,822.270325,204.85675,14.690976,2613.488525,FALSE,-7.1835902873747,7.7461764009573,"36"
263.352356,56.244141,233.940613,403.570313,14.525551,266.395874,28.386543,801.779541,FALSE,9.76229880925174,26.9290527778488,"20"
-83.380798,92.655273,189.326675,1070.074829,1549.58374,349.438843,5.443096,2960.373291,FALSE,-4.63787334462708,-3.07747121732759,"29"
592.236206,94.021568,226.267654,202.477249,-12.970323,750.487061,122.974449,408.650299,FALSE,-9.5335655898268,8.57202413136972,"31"
10687.540039,255.2565,199.475861,160.676407,-42.659744,7.277581,73.690567,11872.853516,FALSE,-38.4389158643454,-33.9726183486657,"5"
7660.989258,21.899557,143.783035,2809.70752,2547.087158,13.532986,102.208076,240.750351,FALSE,15.5622863785505,-44.1782760912807,"2"
563.73938,155.119308,210.71817,678.31427,629.392334,387.248138,3.43343,3914.524902,FALSE,-14.3447615201611,7.26105115678669,"8"
1540.104614,165.281967,192.53923,173.959702,-163.072449,49.639809,90.946228,3112,FALSE,-18.5450672118876,23.2735273728012,"36"
276.313995,89.98436,241.470123,174.711121,18.150673,38.741066,40.183369,1947.551636,FALSE,-13.8913629271086,38.3897353924328,"28"
4457.240723,70.527832,132.691055,1068.138306,1339.102051,2.152393,47.827595,326.186493,FALSE,34.958963307164,-26.0533276427488,"12"
2139.942871,202.615219,457.1875,169.797836,1.723561,52.497673,15.115542,16035.756836,TRUE,-48.7059908604655,-2.18645395027301,"23"
347.931061,64.49897,135.465454,198.677887,715.020386,1136.417847,65.383812,4286.956055,FALSE,-18.9886808242885,-19.9419791910266,"8"
2899.244385,249.579117,296.390839,-28.28326,363.677063,362.835266,62.7542,1150.216919,FALSE,-16.688608449607,17.4788728215292,"16"
2509.908691,165.683945,282.265961,129.116867,980.0849,809.352417,296.085175,4057.591309,FALSE,-15.290044335872,2.66834344394122,"26"
881.100647,97.380135,272.287079,141.324295,997.700378,1044.996826,-17.753262,8678.412109,FALSE,-21.8912404213134,-21.3570552028257,"21"
247.164825,198.859024,220.586182,277.512329,1269.767334,1238.25647,45.998409,3825.590088,FALSE,-17.9158808892787,-30.210535341522,"8"
407.721497,171.547882,322.747406,456.591705,817.876404,387.469147,46.981724,-75.895599,FALSE,7.27520982018604,12.2935338022048,"20"
831.527771,105.504639,210.317886,129.22319,55.0821,58.555237,53.011635,5862.068848,FALSE,-31.4755707342061,22.9897123436906,"25"
1529.460205,184.279373,272.328156,1438.25,2392.554443,142.341904,89.251625,6363.088867,FALSE,-10.7005885505103,-16.2070800909832,"34"
1230.304321,163.457779,230.28447,316.690521,1660.955444,247.657593,42.471306,-27.175968,FALSE,7.07479439167583,-1.39967580753218,"29"
12732.911133,51.892017,149.947021,202.671005,237.246521,-7.497796,132.132462,6600.001953,FALSE,-34.1965011329593,-37.8663315115239,"5"
8067.258789,121.343994,193.955521,91.646294,205.703308,78.075706,8.056687,8783.874023,FALSE,-39.5254687262573,-28.6806803262884,"5"
4530.581055,124.605598,176.082504,65.818329,138.611725,71.896568,88.744385,4744.053223,FALSE,-33.3993272879832,-20.3855822218731,"36"
24702.484375,188.591797,196.592545,5333.001953,2578.496338,-110.390297,-24.683071,-160.209015,FALSE,-8.411012949376,-43.3595251042728,"1"
688.656311,37.179161,274.144623,100.956467,525.747681,392.401947,55.732864,7367.157715,FALSE,-27.3619891585234,4.32546483417277,"25"
4099.091309,104.829811,132.15271,738.212219,1251.206055,160.799881,80.230019,127.117867,FALSE,30.3134637012635,-26.3660525123046,"12"
15820.313477,257.278931,150.59169,3949.414063,2012.154541,-10.169538,91.192764,93.886276,FALSE,-4.33202552087949,-45.4753865187796,"2"
211.220627,231.397049,161.666901,587.791443,1787.933228,1339.225708,-17.848021,5598.243652,FALSE,-18.3574983319535,-31.7687145351688,"8"
2697.194092,47.540997,188.213623,90.146393,143.83876,83.680214,32.409218,7609.312988,FALSE,-34.3067372971867,1.08553504418601,"27"
249.508743,178.160095,282.11087,243.35347,78.537926,90.211143,11.150529,422.324829,FALSE,16.0025640513566,33.4114428682036,"28"
22.935339,18.136841,201.974838,236.166901,151.080185,81.589317,62.37471,525.088623,FALSE,11.961544679298,37.0838335220544,"28"
401.144623,169.570572,257.22229,391.950806,1215.766479,55.185684,70.471741,1299.319824,FALSE,7.44822112783621,4.97881718880319,"29"
5588.725098,106.24382,133.997986,3713.587402,1863.306885,25.485275,99.320244,595.40271,FALSE,41.2256372628301,-25.8623223201337,"2"
537.557007,66.909248,231.781921,174.380615,485.325897,145.434341,66.986382,449.20578,FALSE,10.5574034501881,27.481241466066,"29"
744.317932,125.763367,141.138428,245.016052,491.944092,453.917938,22.569244,276.525848,FALSE,2.92669719831263,14.8448836354857,"20"
152.97757,118.924042,100.255417,98.882233,273.94101,221.403839,30.926067,751.124146,FALSE,6.88411007480014,28.6013779805873,"28"
5819.387695,55.27655,229.355301,11.099502,200.690689,372.462097,-3.895245,780.267944,FALSE,-35.5839254370518,-30.2761848559331,"38"
9051.066406,164.639847,191.186417,2188.298828,2109.683105,-87.183357,37.117455,-63.517288,FALSE,7.07788553984697,-48.1081308496314,"2"
13824.731445,125.031105,301.557831,56.755547,191.479706,947.895203,71.027298,2537.96582,FALSE,-28.9046525993854,-32.2732803755361,"5"
1644.705811,58.107273,317.607635,157.765671,-96.490242,21.986303,58.156845,6584.497559,FALSE,-32.0338052806652,16.559437826303,"25"
4230.001953,120.705147,283.269012,2827.21582,2235.677734,63.737919,-6.094817,-465.459991,FALSE,36.468731260309,-23.02883214937,"12"
1361.723755,119.743935,252.661804,122.783913,-122.248352,224.478729,37.395977,356.079742,FALSE,-0.120229987710849,31.5418524120557,"16"
2669.911865,144.580582,401.830658,113.253792,140.680511,227.112137,9.841614,4812.324219,FALSE,-27.7580695948467,13.3766656181131,"36"
1685.401489,108.926491,250.23558,-15.038638,76.368309,93.13578,46.055099,13144.139648,FALSE,-44.606856687686,-4.42340307508005,"27"
250.038559,66.431808,217.263153,648.28949,625.976929,130.368683,-34.239223,442.687347,FALSE,18.9881047835215,14.1660204685667,"29"
2851.587646,111.915306,7.997487,143.97551,382.881836,18.929098,43.022648,7972.38916,FALSE,-35.4819789789143,-0.670898149493024,"27"
2876.064941,159.578949,301.768768,61.221413,15.644597,143.685181,54.245796,9144.324219,FALSE,-37.7464033420452,-8.1829470948829,"27"
319.260223,169.345139,167.681076,183.195099,395.056946,112.159462,50.476013,7352.693359,FALSE,-33.38316694953,16.4650440420706,"25"
-71.710266,135.02446,234.114029,92.933807,73.254936,154.719574,-24.338137,206.06842,FALSE,18.2023282600416,31.3971537633658,"28"
845.521179,90.656578,334.960602,116.23703,737.424011,220.794342,93.612785,1329.966675,FALSE,4.2698566316731,20.5029644127503,"29"
27138.28125,157.603271,72.39875,2750.467773,1938.467041,-232.556808,23.992785,959.369202,FALSE,-11.7799054882084,-46.4581392215446,"1"
136.305405,203.820313,152.967926,287.751404,20.694679,71.645424,27.979656,1390.347778,FALSE,-4.04863817471598,37.9200114547434,"28"
5499.890625,110.824608,258.747589,93.523918,103.812721,116.417946,54.711258,4199.063477,FALSE,-35.2562580699137,-25.0046092562758,"38"
2151.249756,154.655624,242.656464,154.332413,128.789902,157.925568,60.797451,10065.46875,FALSE,-38.6514747182722,1.18162256397113,"27"
368.871643,10.316071,99.443741,646.444946,1767.904419,89.856339,-2.269934,3368.080566,FALSE,-5.45511007163975,-8.25967124059295,"29"
25861.578125,43.547188,126.002739,1558.046143,1094.049927,32.114002,90.194801,51.752449,FALSE,-8.07348864769014,-45.0028254809156,"1"
4025.995361,80.505905,177.663132,96.151695,101.168808,471.087402,84.678192,449.659729,FALSE,-25.2663566533846,-7.91440512212534,"38"
5730.199707,1.674196,113.308693,1267.722778,1311.709473,46.398769,-42.026707,960.325684,FALSE,25.9045477795862,-34.5545069358055,"2"
4925.623535,107.097496,187.122665,609.097595,1507.125366,142.630005,46.125065,-0.502911,FALSE,28.034069007898,-32.1631904442748,"2"
189.248032,148.246918,192.436554,1374.597046,137.284836,201.530853,73.597992,2679.449707,FALSE,0.153785388812145,16.197021448952,"29"
12786.87793,175.796768,170.959396,749.130859,1323.455322,53.026718,58.515671,-77.349716,FALSE,-4.35781817213981,-46.6960201182005,"2"
250.167831,85.08358,449.101837,305.021057,1613.713013,576.631104,-31.610943,2434.072998,FALSE,-7.02540896925407,-4.78956054089742,"8"
525.834473,155.42749,124.404503,113.612228,1195.839111,984.979858,-15.964377,-150.663483,FALSE,-11.9287159715832,-7.22933910599856,"31"
11057.007813,124.651093,233.601013,315.921936,1735.935913,45.759087,-9.113985,13927.766602,FALSE,-39.3482715260821,-31.9411798491797,"5"
223.380432,56.380287,128.601227,340.670624,881.594055,629.022278,-38.885586,5280.638672,FALSE,-16.9571460986826,-6.42555401210886,"8"
442.815735,90.732315,168.149002,61.044579,651.249329,427.523682,-10.468402,2158.388184,FALSE,-7.95087628022387,10.4851254358957,"8"
5881.665039,119.579865,304.474823,365.21283,-190.943817,456.917053,63.85643,2300.446533,FALSE,-31.3889477193498,-26.8980771816102,"38"
968.590393,108.131989,98.72039,152.39888,947.244995,347.117188,28.307817,7631.605469,FALSE,-25.0316152090077,-3.38807406912398,"25"
384.813538,69.336525,214.037033,135.075714,16.604506,86.760559,-2.492717,3484.347168,FALSE,-25.4971887696204,31.0371512800015,"10"
2400.559326,92.475319,113.934608,142.630264,-117.720772,62.333164,-16.790766,2576.070557,FALSE,-15.9336199686821,16.8726558793491,"36"
732.111084,74.903015,301.22998,559.570007,1516.460205,77.265694,-102.855408,6048.772461,FALSE,-17.4418434162156,-6.70728389833175,"25"
6121.95166,36.946205,287.223145,185.441238,49.697807,67.526443,124.808052,14364.095703,FALSE,-46.7779298194175,-18.9507698522064,"23"
255.872681,110.414688,172.467377,326.601776,1587.265015,801.332092,101.441437,1546.892578,FALSE,-9.12884042373787,-5.3469295842637,"8"
1320.353394,73.538475,329.287323,110.253273,186.445572,33.646729,98.693825,13963.643555,FALSE,-44.5179340239515,-2.10689316876979,"4"
1068.007324,115.276024,169.378967,467.532349,89.728256,-24.946758,30.36862,496.0224,FALSE,9.08432366703411,28.0569396248413,"16"
962.38208,118.474846,219.234879,818.232178,779.656799,268.937592,4.4836,4504.349609,FALSE,-17.1408060147809,5.02984867725652,"8"
-81.069725,96.673294,38.356022,308.186829,877.086548,1742.492676,-7.602235,3672.857422,FALSE,-21.5879959632358,-40.0570120084711,"18"
-103.414268,97.313217,100.190086,53.552841,244.131943,550.541931,111.395401,-58.55249,FALSE,-0.785522217381393,14.2549114462346,"20"
61.160336,114.218727,333.480835,16.491131,765.936646,192.636261,54.545166,502.688416,FALSE,10.9579372051874,15.9967525436099,"29"
12272.708984,149.441879,131.640152,1120.257935,1545.640137,51.930237,-51.97533,8.145835,FALSE,-3.25012590232739,-46.4700100341545,"2"
16294.075195,24.939417,125.899277,1202.878296,1426.707764,-57.577629,-4.951704,894.317993,FALSE,-6.16128664547383,-47.222153243399,"1"
-465.915314,184.379929,204.845108,854.083679,432.109528,2.509004,-15.407118,485.811829,FALSE,20.6339058913076,15.8488199323047,"29"
11868.884766,137.250824,66.895721,-51.785469,-136.260452,552.062073,-56.606468,677.085449,FALSE,-35.9306899403415,-35.6012112202525,"5"
-585.249817,-56.874413,161.396378,293.38797,247.451965,18.322495,-58.236019,15636.65625,FALSE,-42.6247212008499,-3.48611343953552,"4"
777.70282,-34.00473,100.085754,-231.439194,209.663467,338.190735,-42.623554,2213.291016,TRUE,-13.7984221422865,26.5746551180867,"10"
-681.800598,102.110931,167.147369,-31.099352,275.139038,211.186432,-37.034966,324.230988,FALSE,12.0417154885514,23.2135012440941,"20"
604.243835,75.702469,271.647827,-173.186615,43.625767,47.08707,-23.667921,7761.356934,FALSE,-33.5473767503548,15.3907447743099,"25"
3125.654541,166.323425,261.659882,-120.112114,257.833679,106.406319,18.19915,8449.772461,FALSE,-37.4691536024116,-9.51433736202326,"27"
-349.105347,79.521698,69.512398,-57.583855,151.557663,1113.184204,35.245121,-122.265366,FALSE,-11.2632104601865,-8.52816074778958,"31"
5314.428711,228.098282,280.071442,121.0242,-117.940544,563.112,52.048386,377.232269,FALSE,-32.3915402571886,-24.3587338934438,"38"
2393.236572,179.099045,163.360443,251.10434,612.820862,101.380867,-25.100916,454.852966,FALSE,6.70828844327833,10.4593811287811,"15"
-624.632996,54.374741,202.33786,-130.638504,517.906067,49.314369,46.130276,-387.548981,FALSE,13.9569821923087,20.3756443209817,"29"
-347.138092,21.952072,198.806625,-125.033401,387.886353,939.490295,-50.699139,102.982338,FALSE,-7.52864664610963,0.434052187657543,"31"
7913.655273,150.025345,187.931808,3515.56665,2107.270996,3.802104,2.350025,-391.888672,FALSE,16.8205406153823,-43.8277453493368,"2"
1183.88916,117.999031,292.716278,-154.673859,303.289795,114.334557,64.320084,8848.917969,FALSE,-35.0835487295445,9.92134221519395,"25"
-623.681152,24.484278,196.488174,204.256409,1069.280884,208.012756,-24.484348,369.640503,FALSE,7.50486201455936,7.97217233230904,"29"
-447.753235,143.214142,133.77063,195.654556,1014.909851,116.542755,0.603747,1003.31134,FALSE,7.82424653533292,7.97834816409915,"29"
382.602051,268.767426,215.933975,804.760498,1289.471558,143.823624,16.258287,-352.713379,FALSE,14.2736514210077,4.84435855157734,"29"
8654.505859,140.541641,163.006851,1151.028198,1699.387451,158.525787,92.327858,211.957947,FALSE,4.0448242458098,-47.7452043946657,"2"
5748.390137,164.427307,266.814148,-109.176361,326.899109,116.387787,55.725998,7325.663574,FALSE,-42.8204282718564,-23.1837392906289,"27"
-174.457199,269.217377,205.544449,251.149734,1200.788086,1233.976074,-40.805252,4086.671143,FALSE,-18.1070444501388,-29.3960170523699,"8"
16854.150391,91.074722,168.190598,1792.210693,1122.940918,-168.672455,15.237696,548.990356,FALSE,-8.3326419304508,-47.7731827500316,"1"
18052.570313,91.271797,279.748352,3105.781738,2472.447266,48.861858,-19.973934,-127.592201,FALSE,-4.94482059817765,-43.4062700629836,"1"
-420.707642,108.809258,245.276688,-21.896017,99.059875,82.580879,-6.048882,1607.592285,FALSE,-5.71428000905845,39.169229503333,"28"
11260.333008,110.604622,182.931107,1736.956787,1155.216431,12.416837,-45.501225,-379.407867,FALSE,-2.73225059095943,-48.1207575400475,"2"
6382.94043,232.788086,257.027588,1155.096802,1746.212769,158.79422,90.984283,61.15229,FALSE,20.1376111538134,-41.471729094444,"2"
16993.603516,201.163727,114.11216,5013.464355,2222.10376,88.748344,52.133652,-192.765686,FALSE,-3.38893900730544,-44.4774951046457,"1"
-681.928101,185.738525,251.302673,-0.799307,-71.878586,141.187408,87.994652,1102.185181,FALSE,-1.89601027987388,40.7889573146668,"28"
9741.128906,97.889404,256.694244,1502.341919,1754.015747,-11.089008,6.925472,-435.119232,FALSE,2.64573596197486,-48.3046434869405,"2"
-553.945862,161.998138,236.239792,147.119705,10.490687,153.058533,44.304482,126.838432,FALSE,13.9660460184667,36.5442326450066,"28"
751.776855,119.858818,208.863342,1706.012451,2360.165283,177.535538,37.415081,2954.786621,FALSE,-3.01681046870234,-16.1399434382442,"17"
-245.102249,174.983292,189.450684,22.012199,115.073189,201.682388,58.334869,-219.014572,FALSE,11.0661700992168,32.9963064008588,"28"
274.292358,168.497009,226.427582,628.264221,1036.470093,191.725861,26.568735,-297.428284,FALSE,14.0863225832521,8.88609659216555,"29"
9073.320313,102.894783,203.579422,1046.618042,1694.766235,1.814761,89.152687,-236.96698,TRUE,1.14051392844377,-49.8777240510634,"2"
83.422615,90.772606,239.853821,-37.234703,204.469162,213.759476,-17.640921,15396.581055,FALSE,-43.0283193055004,-2.45296972141104,"4"
-298.873627,60.617992,186.968475,49.950512,40.388115,122.010864,34.579319,-120.401024,FALSE,15.3746236154142,37.6423367171938,"28"
53.081295,233.873749,162.845612,137.369522,1586.223511,2279.390869,-10.576838,6419.285645,FALSE,-20.1167941310094,-40.7812043108656,"18"
-423.041229,170.232437,207.228439,36.586926,108.595703,1108.570923,-34.497803,8159.901855,FALSE,-22.1092486870359,-24.5258528039794,"26"
1795.637817,185.034531,593.436096,52.783264,114.529869,197.567566,66.139229,32342.580078,FALSE,-49.8413137473074,9.33946442828417,"23"
-468.946198,30.062607,196.252457,548.809814,1231.51355,241.757126,143.510971,4063.351807,FALSE,-9.52294358091101,1.06636378119403,"8"
21800.919922,137.059921,177.057755,2028.291504,1656.007813,71.068527,28.351543,324.751526,FALSE,-7.98946241875778,-45.5536999163204,"1"
457.493195,155.115875,236.248474,86.020592,69.550468,434.415009,19.753815,3764.81543,FALSE,-15.183856399663,13.0409781924513,"10"
21269.425781,161.823792,235.183792,7523.758789,2285.73999,12.291987,13.745996,477.880341,TRUE,-7.10841602965922,-42.9523108829445,"1"
13162.984375,151.00116,277.761139,2561.64209,2568.648193,-69.478943,2.561874,-39.880867,FALSE,0.938549777099571,-44.7821903155036,"2"
8730.833008,189.486755,246.190948,898.015198,1926.970703,123.848732,132.834412,-372.818268,FALSE,5.93818200406045,-47.7826392069397,"2"
9740.100586,128.81897,259.385284,1526.886963,1727.555176,83.948692,67.064651,223.072418,FALSE,1.38328851359577,-47.6515402026771,"2"
407.358612,70.681145,161.284973,76.235855,99.365784,275.68399,12.816005,-320.648041,FALSE,11.2392737922317,26.8835326467941,"20"
2236.668457,293.449921,316.897064,358.985168,135.599319,158.791794,93.193497,6733.017578,FALSE,-31.5120415025968,12.338864443053,"25"
15017.110352,208.828003,191.072998,4008.270996,1496.642334,26.258917,58.56506,-554.492126,FALSE,-5.59655030462898,-45.9267553532928,"2"
6155.306152,189.0047,209.271484,3089.310547,2236.424805,109.297272,72.436119,325.506775,FALSE,29.3328322543138,-36.0438309277435,"2"
-123.92733,140.572372,236.302155,982.994019,1792.303833,158.000626,37.259594,2175.800537,FALSE,2.15537332197719,-5.09689133206413,"29"
10704.286133,88.361565,106.157127,2884.149902,1281.777466,14.08309,42.019272,182.748337,FALSE,-0.750896327327268,-47.7764490470961,"2"
5759.594238,170.851303,303.53717,3778.940918,1822.634521,101.003502,152.51442,608.176025,FALSE,37.6570298567245,-28.2644090526539,"2"
230.150726,90.918465,189.545883,1283.651855,2300.951172,223.68428,96.464592,100.958046,FALSE,8.51383109395571,-9.54481192347795,"17"
-47.066841,267.303711,180.317627,159.430115,42.617317,445.094086,33.227989,2966.561768,FALSE,-11.5446244777584,13.6326633114546,"8"
-415.616394,208.169418,384.734436,1609.97644,617.378357,148.842819,-2.458746,4636.361328,TRUE,-12.6971281471484,0.902547970331232,"8"
-185.542175,134.10881,130.032974,611.120239,1182.219727,172.549545,106.130669,-47.373795,FALSE,8.42206496062987,5.1285120796086,"29"
-561.114807,207.870499,277.698761,392.216339,353.280701,425.779602,64.930504,4601.874023,FALSE,-14.8276406832731,5.99781453997907,"8"
3615.823975,48.46365,225.662445,1198.838013,1866.585938,110.976395,-6.033603,420.957123,FALSE,27.3659615644116,-26.9611590636296,"12"
639.168945,103.517906,214.241013,161.958511,685.260193,976.109192,163.339523,4698.102539,FALSE,-17.3409825326917,-10.4238366240042,"26"
2568.405518,143.373291,305.934845,130.818924,134.44458,170.485306,63.526329,5425.591309,FALSE,-28.6389910939381,11.5774535862061,"36"
10846.226563,116.199104,221.805038,3052.185059,2075.249756,9.799362,169.01503,-486.069183,FALSE,1.97468087367733,-47.7024402946157,"2"
-105.679741,107.801842,296.610199,456.569702,1400.999268,88.75914,99.880669,411.872284,FALSE,8.42941841853867,2.31939296688515,"29"
688.411682,212.807693,210.198029,152.309387,149.353012,279.806732,30.721931,750.77832,FALSE,4.05107965888105,28.3320660949424,"20"
-332.812622,106.67424,226.868515,1546.599121,290.910614,6.562515,66.61657,1857.721924,FALSE,17.047604509838,11.6376457643945,"29"
-542.863586,98.006516,223.375153,211.524033,145.304428,197.555222,41.309544,139.520294,FALSE,14.0405403316275,27.991961252572,"20"
2023.123413,169.734421,179.256409,171.017593,89.968781,12.287985,49.903954,9514.466797,FALSE,-38.3110703916053,5.16235685041896,"27"
826.659058,112.107475,186.025635,115.750526,366.135712,296.26178,43.114391,1628.933716,FALSE,-5.92214282492863,26.4315547423916,"20"
-183.136917,75.506325,235.89386,239.860291,748.333862,308.790741,43.504158,-234.512497,FALSE,7.83181096351055,13.3440660522226,"20"
5834.875977,61.564236,202.379456,792.266663,1801.834351,157.296387,81.344559,-217.418076,FALSE,24.7041904220704,-38.5356162773617,"2"
-363.445953,137.740097,227.451813,135.981842,111.257271,88.586052,79.644714,385.066071,FALSE,9.1449749947463,41.8253004929239,"28"
18963.927734,86.522438,245.40152,1205.280029,1235.184448,109.141945,25.003218,269.791016,FALSE,-5.53428842020643,-45.2697982575269,"1"
2156.656006,145.486633,267.523163,143.474625,93.947556,281.943329,50.909325,421.41687,FALSE,-7.4812035672524,28.423282920532,"16"
3781.663086,36.475578,293.345917,53.157604,252.098358,51.323189,65.313438,6845.619629,FALSE,-37.3824989724721,-14.6573027010893,"27"
9442.921875,301.348541,282.875854,154.506104,73.61882,467.10434,60.306988,1550.407104,FALSE,-38.412898536993,-32.937695844344,"38"
246.333984,196.901581,211.391251,524.343445,302.51004,148.743301,33.247417,105.696198,FALSE,19.6091792980059,22.3323604213778,"29"
-450.251099,140.147507,220.01059,668.048645,858.959045,203.793579,49.468334,2420.631348,FALSE,1.66356110554388,6.34322732753827,"29"
-68.686035,142.022491,158.469193,112.381256,107.684975,70.756706,44.717113,878.069885,TRUE,-12.1122528752996,40.6781066561917,"28"
537.410034,179.205902,212.419678,677.618042,1214.203125,162.143585,121.705841,256.968903,FALSE,9.73998383530652,4.76239615889151,"29"
19071.597656,53.869732,326.837494,2596.486572,1869.698608,-26.473452,-1.285238,85.252747,FALSE,-8.52785571985394,-45.2956013647277,"1"
580.415771,182.399368,233.708649,147.473923,320.315033,361.970917,173.598572,4807.506348,TRUE,-19.3923144068608,23.9067045248096,"8"
1423.846436,78.746872,264.44397,371.819672,495.124298,242.438217,4.65668,4493.71875,FALSE,-22.4428643730317,15.9924254663357,"10"
-15.33538,69.387672,272.366882,312.603973,1435.563599,813.862061,22.51049,4079.59082,FALSE,-12.0153996088247,-13.226589445705,"8"
-344.625366,76.663933,204.715897,110.613945,481.965332,769.58075,36.598713,892.913025,FALSE,-6.10904704317972,5.49810967761034,"31"
-421.276459,28.0937,231.060547,99.061775,77.752182,231.874786,20.902826,-90.215767,FALSE,15.2744937579353,25.5903500896453,"20"
6508.321777,157.974503,311.736298,135.881226,85.970573,128.570938,47.909348,11644.554688,FALSE,-43.501944168018,-23.2300386297079,"27"
124.492882,192.321503,348.585571,140.346619,592.768677,728.455933,118.388329,83.086082,FALSE,-5.64228180517984,7.65403329851186,"31"
8567.927734,95.233353,131.764832,1140.110474,1446.427246,35.88834,57.203239,-430.213593,FALSE,4.177894461859,-49.5791616260791,"2"
-46.706894,103.051987,83.435921,835.389648,1507.84436,303.185455,136.810226,2924.522705,FALSE,-1.74871716981222,-3.68835455375548,"29"
14392.759766,114.038322,122.855377,2558.048828,1447.994995,-45.811035,-43.025055,288.136169,FALSE,-5.46021348508151,-46.5132098755748,"2"
-405.819824,96.844299,196.222168,657.714722,1335.57312,1616.790649,-3.5477,6055.572266,FALSE,-21.4263430211256,-37.6024467634957,"8"
10702.758789,89.614639,119.165962,4447.121582,2215.833984,-0.354674,25.88023,-35.2798,FALSE,1.45838807613148,-46.5900136591903,"2"
611.504272,90.581924,204.721771,308.055908,805.754211,480.300751,76.239281,3051.237305,FALSE,-11.729757196659,5.69261916348925,"8"
11809.376953,167.113815,127.423759,3623.016602,1701.731567,102.59742,-2.625584,326.014893,FALSE,-1.12934171675628,-45.7622829360509,"2"
383.875824,225.847855,257.822998,351.009552,2098.722412,209.162277,83.869492,1257.755249,FALSE,3.85163722119823,-7.06322750712364,"29"
94.223213,136.672531,157.699219,192.035446,500.594513,143.669586,80.694626,1525.500488,FALSE,-2.50866733448337,25.2132554022881,"28"
398.932159,90.712715,160.446136,40.643921,204.367584,597.86554,69.95034,-101.069351,FALSE,-3.95052375203161,13.2775957225735,"20"
6927.415527,95.297493,180.768082,2023.544678,1735.499634,115.264191,44.416363,6.413268,FALSE,20.6314759745429,-42.2302950403843,"2"
611.857422,138.216721,346.131226,103.037987,129.257721,46.845783,81.480774,5980.876465,FALSE,-33.6142970365538,25.2857593724634,"10"
1975.842163,191.512833,306.971344,462.621887,260.821564,155.055099,104.959747,12504.246094,FALSE,-43.5571982136784,-2.32083780233501,"27"
64.160248,104.397522,144.03302,457.06897,316.052643,10.324947,15.940151,151.956314,TRUE,18.8702531322398,17.6286897330426,"28"
-293.288055,11.415537,87.204666,570.657776,1230.709106,130.403656,-8.421824,919.949707,FALSE,7.52947075464354,4.14551121009171,"29"
1191.856689,190.306427,237.108231,103.397438,65.029831,132.403351,24.471317,146.233032,TRUE,1.96295472549777,30.1847521125447,"16"
5720.224609,96.889168,105.989189,909.93158,1195.936157,55.484104,-7.410942,5799.044922,FALSE,-17.2518581287256,-28.3109903196194,"13"
258.437592,94.927498,201.37851,98.121292,590.587341,68.289238,7.841614,-202.75441,FALSE,17.7990060048699,18.1420753664276,"29"
12638.71582,142.994125,140.250168,1494.882446,1655.317993,-97.193375,-30.755547,-194.755234,FALSE,-2.47854348317927,-47.3209412473812,"2"
3914.069092,130.934677,234.559601,213.337204,-96.103111,338.23465,62.309258,832.126892,FALSE,-27.5888137567162,-4.22835680203993,"16"
771.35144,218.048996,184.945938,212.692322,-17.25593,385.159851,5.531932,2614.757324,FALSE,-12.3316241030842,18.0043307296081,"10"
-132.913269,146.862289,282.953644,286.349976,-105.508118,151.041061,70.299988,2769.672119,FALSE,-22.2536061320272,38.2980953484645,"10"
15503.708008,187.105698,151.63208,1258.643555,2091.071777,40.754276,59.954819,-356.602966,FALSE,-5.81731705751894,-44.8713928849299,"2"
-139.976639,39.07177,150.182571,531.109619,813.470825,200.575058,130.068726,214.304016,FALSE,9.13896144795625,11.1029396359582,"29"
6223.864258,154.198273,203.834717,182.165054,19.999882,11.869769,-2.429013,12025.628906,FALSE,-43.075293635195,-21.5746058437034,"27"
-242.155807,194.559814,158.996307,313.699219,915.003479,143.555435,157.20932,2536.003906,FALSE,-3.01645506239851,6.60771244196331,"29"
386.919434,136.501053,257.63385,162.643738,-20.793242,141.859558,39.115742,4659.915039,FALSE,-29.4377908229215,27.8194678495367,"10"
4341.893066,196.130692,247.78801,1000.483337,2432.664063,593.971252,-65.146576,6193.081055,FALSE,-9.9555973639095,-27.5073683380567,"34"
15449.273438,279.276794,189.260345,1947.182495,1840.06604,79.059357,54.084423,-177.959335,FALSE,-5.69392864111026,-45.0447606392242,"2"
300.7771,33.201984,209.184464,210.90773,333.12735,703.959534,86.166954,-35.858582,FALSE,-5.46985571333913,8.94688444345335,"31"
619.956055,137.982193,203.798523,472.624908,1014.435547,116.819359,26.340897,-162.924988,FALSE,15.1268512667695,9.50569249581763,"29"
587.219055,121.676468,239.337952,103.776436,59.812538,172.270966,46.442959,610.938538,FALSE,3.78000155739697,36.8196510900672,"28"
263.017181,86.376938,243.700256,125.751984,901.316589,870.714355,12.742387,2074.519531,FALSE,-10.419434358204,-2.55065603855809,"8"
3115.119873,158.666718,287.955688,3345.272217,2216.06543,-18.878128,60.641563,527.144287,FALSE,42.2177805372642,-7.32512794576156,"14"
348.779297,249.376907,270.100647,179.273743,169.829987,128.487991,105.771317,1000.778259,FALSE,-5.13666326067462,44.71817645925,"28"
-99.055038,251.048782,196.266052,63.888836,1236.149536,128.643646,29.496191,887.296143,FALSE,7.74242990882716,6.12633856831436,"29"
550.701721,184.525803,123.724907,39.760563,681.113464,187.517395,16.529078,1070.582153,FALSE,8.18278495938752,16.276813517948,"29"
3.30235,70.050125,289.871277,196.45903,577.598389,1150.164429,15.327218,176.257858,FALSE,-14.7403944267893,-13.085832230653,"31"
6055.022461,90.730835,308.624084,218.050003,-64.494301,201.129089,56.24741,12231.77832,FALSE,-43.7545103499155,-21.3507922294145,"27"
-47.145851,225.585419,188.169113,405.0271,190.360977,208.858063,-3.427318,2235.840088,FALSE,-10.4687109195719,26.2301032651792,"10"
643.332336,321.474396,371.952667,270.909607,267.118652,761.295715,-10.237154,2903.589844,FALSE,-12.1359143105103,4.96952670234667,"31"
97.341225,162.870117,237.56044,391.327332,896.044434,169.10524,-25.493326,1713.251953,FALSE,5.66072024847443,8.78385865548493,"29"
290.237885,97.137741,171.978165,166.522003,265.435791,513.365112,98.329971,620.44458,FALSE,-2.85245745508729,14.6122399042125,"20"
23979.964844,180.368683,200.197144,5585.772949,1612.90918,21.181656,18.347639,-650.746704,FALSE,-11.0623159002903,-45.3187216633076,"1"
19951.755859,47.977203,65.083099,2103.879639,1516.366821,-182.25354,12.117847,48.331638,FALSE,-10.51638114848,-46.92173763841,"1"
49.081982,48.094131,126.569832,216.151215,670.249084,940.878235,55.255016,3058.845459,FALSE,-14.3222007995524,-7.67265329542999,"8"
-74.333702,94.554161,208.462097,94.88591,481.275635,141.78093,-2.256958,2088.710449,FALSE,-4.63308027777614,21.9863378265481,"28"
11672.801758,178.15625,283.048492,2549.112305,1761.655762,60.199806,27.328527,-548.639038,FALSE,-0.0460501764208717,-46.5019473852624,"2"
123.898224,118.205711,238.190018,261.854095,210.352249,415.431885,-5.056756,240.584732,FALSE,5.00082047952777,18.5060925781696,"20"
-26.135452,169.020325,230.302307,187.519623,275.944336,131.295898,-46.613308,786.740173,FALSE,14.5755559412802,24.7699673587726,"28"
29490.431641,126.043922,151.412369,3304.64209,2126.623535,58.589901,35.418156,179.888458,FALSE,-12.1843262135789,-44.5428693422039,"1"
-91.402931,135.933426,183.878586,42.177635,368.323914,164.494202,29.89072,83.542397,FALSE,13.2858189471009,27.1491204338228,"29"
6294.802246,165.929077,205.884247,3122.492188,2548,125.921066,114.766556,345.266327,FALSE,25.4445765873608,-38.1019177097229,"2"
-71.247772,120.305397,194.930145,96.82811,278.582764,109.768486,73.936035,6667.196289,FALSE,-36.2870129429754,24.3794411450778,"25"
464.388794,129.47464,267.746552,615.469055,1067.299194,212.454361,59.594116,397.389069,FALSE,11.3138002457416,7.53515313588236,"29"
-210.619431,114.148689,86.818596,674.374817,785.769836,386.056671,41.190464,1426.729492,FALSE,0.783226261211251,8.50543161742225,"29"
1009.568726,167.282135,181.198212,150.001678,142.252823,291.829224,-8.322338,3718.244629,FALSE,-19.8626427776498,19.4164643733012,"10"
624.712952,79.330002,251.586121,295.310486,1306.834717,-0.000837,244.034119,298.365234,FALSE,5.02834387870469,2.5420496003183,"29"
1653.654053,111.012558,267.368073,956.831848,1203.550537,329.244232,15.867485,18893.814453,FALSE,-39.8620318895894,4.22566973759411,"23"
653.916138,248.197632,371.388245,372.791748,403.732208,156.567749,201.778427,4333.576172,FALSE,-26.4069552089358,27.5048689134949,"10"
915.502869,124.435425,174.241364,674.199036,1947.623779,79.192062,124.797607,63.471306,FALSE,7.39838500346788,-7.35386225578362,"29"
-151.782761,149.2612,197.429306,517.158386,334.12439,39.851833,93.840881,-225.790802,FALSE,19.3547830247564,22.9631972847741,"28"
1022.530273,45.950958,236.662094,487.792572,600.404236,633.903259,32.490093,4080.725098,FALSE,-15.8061360722442,1.91084768979903,"8"
2002.797363,165.928192,343.189972,2002.417358,2205.76416,73.720665,78.664932,4883.12793,FALSE,-3.89830201439696,-18.5995002794877,"13"
-208.832489,85.564674,181.254837,538.360962,295.7146,71.76091,-20.935497,3314.476074,FALSE,-15.7355709132827,19.5482083747815,"10"
1259.507446,53.771973,246.041412,124.247337,-132.220581,72.320869,34.362953,10168.845703,FALSE,-38.0762393503277,3.65713288987783,"25"
23.820515,135.921936,176.503571,30.826021,1535.971802,2515.17334,10.464401,4054.002686,FALSE,-20.5694715930962,-42.8935215359682,"18"
161.285019,175.576935,159.361221,249.240448,519.344238,193.98407,143.997604,3562.475342,FALSE,-16.6967576551033,17.3100519460987,"8"
1096.795898,113.893463,140.44458,179.709412,847.776062,90.602112,43.129936,2697.9646,FALSE,-6.26651276732368,11.1198427529066,"10"
2534.346436,167.608368,275.168182,132.571136,-19.654881,66.198311,45.142021,10813.69043,FALSE,-41.9599135937257,-7.69274248275856,"27"
2904.453613,55.25893,179.175446,425.461945,1044.558716,172.654068,62.185516,1542.481201,FALSE,9.00050436301808,-6.05824989346914,"36"
234.55896,213.305878,244.787949,374.775177,233.699036,93.638977,58.33033,-67.105103,FALSE,16.1907078967018,29.1171261127526,"28"
107.666908,11.857328,128.930603,152.811203,374.166656,657.229431,47.132469,1076.999878,FALSE,-6.8686410052658,8.56288497547602,"8"
276.758881,185.85788,135.917923,586.545715,1817.296387,843.063171,116.831879,567.562866,FALSE,-8.63296668539602,-8.2638927095099,"8"
2683.830322,121.725647,242.583572,157.145172,-104.307365,263.593353,150.277084,911.411255,FALSE,-16.6928421155994,21.7913963762265,"16"
718.588684,218.093033,300.132965,125.929985,102.038445,88.313713,69.916992,9811.003906,FALSE,-36.9930028152793,4.95071151184377,"25"
457.294617,120.300354,70.020767,654.541199,2551.574707,194.579453,-14.479382,1648.482056,FALSE,1.53200327888274,-13.6123131432669,"29"
2282.37085,171.727371,192.555771,630.616638,1331.470093,166.155014,54.204605,2509.172363,FALSE,3.11170908263597,-2.26109944379226,"29"
264.009949,210.41066,140.892166,76.507095,394.231934,389.168884,45.741291,-10.877177,FALSE,4.97331858371236,19.210599327936,"20"
24512.232422,148.216766,83.838188,1634.328003,1435.478882,42.755703,28.822388,-166.539169,FALSE,-7.91357618115334,-44.6026248177873,"1"
301.924225,96.367958,179.220596,553.598633,964.02948,209.654541,50.052013,1519.113525,FALSE,7.09351895764646,7.43292587187408,"29"
177.271973,58.147778,306.995422,503.848328,625.311768,86.550362,-9.221462,4397.498047,FALSE,-17.3139549057123,7.13929269151553,"10"
68.799706,57.315548,197.482605,139.557587,1230.842041,1055.04126,-19.292347,7511.674316,FALSE,-21.7147515134022,-23.8359422548212,"8"
9807.712891,183.501511,218.314636,1355.879028,1054.076416,62.159946,306.954163,-271.144073,FALSE,-3.26424026841211,-47.7083434568464,"2"
1023.177063,160.165619,192.450882,139.88623,282.748047,87.202477,40.619812,7839.415039,FALSE,-34.5926088336671,14.8770537376273,"25"
427.407562,157.100449,226.320679,486.55188,667.132202,96.816269,-7.238533,2610.363037,FALSE,-5.04646147890424,9.28856489316673,"29"
587.997375,91.271797,95.316261,640.445862,975.999207,162.227478,10.164322,513.571289,FALSE,13.697263816897,9.10068102280405,"29"
29707.404297,96.061333,137.075867,4875.28418,1520.841187,-170.858688,-93.851021,-396.040558,FALSE,-16.3525634041174,-45.7137844135391,"1"
4819.482422,227.901184,415.26828,22.355692,95.830475,64.492043,1.952523,12702.399414,FALSE,-46.7110606173422,-15.6369570474206,"23"
24352.226563,60.60165,311.233215,2041.622803,2234.47876,-138.567139,143.56369,259.327393,TRUE,-9.45601208257353,-43.8309531867109,"1"
132.787033,133.760101,130.62233,1024.756592,1761.34436,69.559776,15.939353,386.374817,FALSE,9.40894310812249,-3.24259741785873,"29"
3190.716553,159.213058,199.468491,192.438858,1511.494019,667.166504,54.438133,4394.20752,FALSE,-17.5862059707774,-5.84518014579365,"8"
8080.924316,40.388943,139.589539,260.762817,-142.70285,27.02977,101.968872,7948.469238,FALSE,-37.1804366893557,-30.2924224758057,"5"
452.11795,186.776245,299.427795,968.223938,2367.089844,161.552399,53.183006,73.222923,FALSE,7.40207179914363,-12.4009281731209,"17"
968.443176,173.03389,217.055542,975.516541,738.861694,128.469269,61.654472,273.019043,FALSE,19.7586699122109,9.85251115559434,"15"
819.093933,180.898987,290.614014,198.471664,779.44635,202.657089,72.367668,7863.255859,FALSE,-28.4384342376075,3.48958741262865,"25"
381.970642,113.009171,141.198944,197.837723,1148.681274,634.243225,26.5508,3583.026367,FALSE,-11.3395178127749,-3.75508978176357,"8"
249.522064,114.930573,87.456924,482.108307,1245.831299,133.58876,-28.727402,153.267838,FALSE,11.1029369989733,5.40918687863971,"29"
4395.891113,115.668831,301.359894,1036.985229,1558.526611,117.513069,-43.318443,5110.401367,FALSE,-8.66715570762813,-25.0095856008315,"13"
-18.241943,95.608406,238.987411,504.653168,525.916565,556.340881,2.622003,2680.874023,FALSE,-10.4563508568919,5.58002022986648,"8"
52.265518,53.134899,144.47757,150.035049,153.827866,522.6604,16.454203,548.458679,FALSE,-0.92226786856936,15.0731025531117,"20"
-16.87904,118.795021,355.623077,943.860779,170.073715,187.510818,45.874802,9356.898438,FALSE,-35.5267439820014,1.33060456575867,"25"
-179.826813,25.286057,210.713425,471.680603,1245.498779,103.929329,5.010936,3089.236816,FALSE,-3.20530302909634,0.131979443620962,"29"
205.503387,106.593285,214.276855,324.537811,1020.395996,91.333855,13.461638,10622.911133,FALSE,-28.7129654254825,-7.80704387462536,"25"
14636.03125,56.611122,136.105286,1136.165405,1005.607117,32.442238,75.602226,394.092163,FALSE,-6.10241962466212,-47.3329053039208,"2"
110.654839,177.458633,202.505676,68.914162,791.437927,219.451874,39.403599,7900.938477,FALSE,-25.7326425977361,-2.24579547866742,"25"
10484.764648,80.579735,215.849625,1249.34082,1341.722534,-66.548897,-84.86898,-498.501617,TRUE,-0.277511571685241,-47.7267291796541,"2"
492.370697,150.970627,194.488495,174.873779,1367.114258,130.510406,-39.738823,6102.12207,FALSE,-18.3355765060236,-3.71693223221131,"25"
27556.28125,126.402077,46.408878,3261.76709,1614.109375,-241.445694,84.696892,-78.999557,FALSE,-14.3016023604737,-46.7744478072307,"1"
685.169006,74.116226,297.364655,471.240692,1529.051392,70.634415,60.701038,7598.341797,FALSE,-19.9934328495833,-8.68600594322256,"25"
16708.242188,204.161713,224.146622,3615.615967,2564.888184,-6.794808,20.390608,682.918884,FALSE,-2.41618048136973,-44.1738642156813,"2"
125.367493,213.998428,254.663086,180.410156,397.911102,400.395081,109.680328,257.244171,FALSE,2.89587601038117,18.4592361715123,"20"
13501.03125,105.4189,150.137299,1137.11084,1309.528564,-28.268101,-9.387015,-117.805717,FALSE,-5.63876651398596,-47.2874379937843,"2"
-112.981285,181.654129,215.075485,532.399597,730.092712,465.613037,-19.005194,221.660843,FALSE,2.83954335961487,10.657875651006,"29"
9619.788086,117.393494,129.23645,2258.260986,1694.503174,-31.908226,-10.391012,215.140137,FALSE,2.35581874907978,-48.0117687723789,"2"
68.074013,166.795013,148.544968,360.658905,883.239746,388.3927,54.610584,166.316513,FALSE,4.64207498870247,10.7606803438281,"29"
280.272156,106.138664,191.618393,308.32843,744.26062,399.589447,106.930145,903.970825,FALSE,1.77544675463585,11.3264757271545,"20"
2800.241211,24.445391,277.455139,143.35408,6.291711,187.845062,116.049698,2368.560791,FALSE,-16.4881718797069,14.8837322813903,"36"
120.161522,162.056992,177.606735,110.567825,198.965439,293.230652,104.365494,394.530518,FALSE,4.64368623599639,26.7504204308522,"20"
1702.490601,61.582726,59.876644,622.686584,898.245911,45.420975,53.108997,1866.890015,FALSE,9.2460158954413,2.96174989151851,"15"
4712.378906,98.244179,268.025116,482.783295,1498.209717,221.975479,49.399704,10766.107422,FALSE,-39.676901072968,-19.2270859582112,"27"
452.538055,48.569469,214.686996,31.163258,318.209167,99.819344,-13.431375,143.82132,FALSE,15.6374586358691,28.3967311694173,"29"
-2.647731,86.481934,142.436996,285.951691,462.907501,183.980637,31.782297,1385.592163,FALSE,5.39753778470953,18.6455736654061,"28"
269.823303,91.644188,221.653732,132.282364,-13.802067,1281.582642,-2.096104,1312.886108,FALSE,-16.3592081242959,-21.1036881173473,"31"
10751.952148,86.480125,175.140366,1925.876465,2237.464355,63.863575,-6.691132,230.411087,TRUE,-0.324397311291748,-46.4272977166568,"2"
22847.898438,219.19693,304.193481,4519.702148,2674.737061,21.753962,86.045616,-21.143364,FALSE,-7.34431291846384,-43.5114422465072,"1"
1706.045776,107.666153,144.334015,120.491707,90.359299,166.486145,32.222542,71.712608,FALSE,-0.572889609327394,31.4213147855927,"16"
193.214981,82.612801,301.845703,1251.853271,1601.541748,176.577835,-5.328181,1112.201172,FALSE,9.04252757675105,-0.863532406825188,"29"
8137.543457,-0.198103,204.584656,5037.304199,1421.42627,54.260715,-50.726974,258.28244,FALSE,19.7959846632726,-37.594971041706,"2"
10840.647461,160.919174,98.283188,2343.916504,1753.272461,50.486866,12.516163,179.373093,FALSE,0.327725399172237,-46.8262807297663,"2"
387.676361,105.719398,121.095528,1719.096313,49.83474,46.591915,57.186455,1326.549438,FALSE,18.6051796157914,8.32904761030233,"29"
660.631409,48.37056,198.826828,121.793961,70.714645,74.804413,15.691244,-128.907288,TRUE,6.14227010527853,32.4961169609842,"16"
38.66531,258.019409,259.526947,407.558228,508.822235,173.438141,14.855114,2946.918213,FALSE,-11.4697474565976,15.7166264384061,"10"
30434.191406,106.684769,128.605637,4282.074707,2340.679199,-154.832123,79.283478,327.642212,FALSE,-15.1625736424832,-45.6580884387542,"1"
1148.902222,135.426941,193.070297,134.29808,114.246971,145.196503,104.197273,1151.255615,FALSE,-3.1861473123268,36.605990036704,"19"
17257.544922,-10.530158,49.981491,3026.866455,1205.218018,-58.546669,-23.306673,355.06958,FALSE,-8.59904744090877,-47.8147161720018,"2"
3699.695801,65.633812,257.953827,152.673141,2330.213867,245.3423,39.448235,925.88623,FALSE,10.9356001006832,-31.2574459274808,"6"
2266.060059,175.864349,195.825027,264.366058,11.624293,72.965744,23.582394,7307.901855,FALSE,-33.2856005496127,11.2784977547541,"25"
427.406647,153.957382,244.070755,229.034576,-92.720932,326.137054,14.06017,5279.469238,FALSE,-24.7597627111223,17.8519624122644,"10"
902.190796,62.442001,230.25592,141.67128,22.274078,74.347107,36.51046,4713.856445,FALSE,-27.9418367615226,24.7371181843681,"10"
380.695343,142.345032,251.430084,452.290558,1053.495483,563.572632,100.532379,1976.725586,FALSE,-6.19486971792556,3.42651029283909,"8"
1104.283691,69.801315,233.157852,115.168793,65.581871,126.277481,-1.235505,567.893677,FALSE,5.39604617958987,30.7331025751569,"16"
-157.380371,26.345976,192.027847,637.92218,1019.666077,86.121437,16.166821,758.647095,FALSE,11.7709468078,8.13620723825168,"29"
180.493851,76.806015,117.594688,555.636353,929.043213,134.012222,48.469891,4664.319824,FALSE,-15.0397891340134,2.24889320396672,"8"
921.273071,101.466499,252.969315,206.441437,-137.538467,199.094849,88.931847,4065.390381,TRUE,-21.9235365052123,19.8174902406793,"10"
6418.751953,61.16309,196.617569,507.804749,1112.470093,169.596832,42.027702,4312.044922,FALSE,-22.8219696018723,-28.9889027852426,"13"
10301.731445,220.61586,215.635056,2285.066895,1535.978516,-15.069245,53.208832,572.849121,FALSE,-0.077289402600765,-47.7299939480321,"2"
363.831421,140.932648,205.481705,190.404922,1357.588379,339.307098,15.390578,4785.856445,FALSE,-13.9643326463259,-3.29502409569463,"8"
2613.593506,174.507935,222.975876,89.047813,110.733665,649.514771,20.387468,7068.556152,FALSE,-21.6261901445503,-1.51966208639256,"26"
2592.908203,51.95705,206.550766,582.711304,1659.303711,380.411835,75.445259,2928.354004,FALSE,-3.97927240792356,-4.91807016828915,"8"
199.454208,84.586838,217.822189,278.312012,1039.679077,215.023148,24.735929,1935.2229,FALSE,1.57916037682532,6.10498128157034,"29"
674.383484,160.026321,301.595459,60.362797,134.144836,73.899864,104.79261,7209.29834,FALSE,-36.3960248896889,22.1390972406072,"25"
196.281021,182.329422,243.439301,551.621399,1242.420044,619.327393,-24.941566,1512.810425,FALSE,-4.56831306544617,1.66241730612222,"8"
2489.321777,146.466156,284.175812,39.03783,353.071136,68.263245,127.275436,8605.432617,FALSE,-37.122544781164,0.424974074852283,"27"
11795.957031,140.995346,265.976685,1167.693115,1135.244263,-135.705673,8.828018,266.44696,FALSE,-4.33664037284443,-48.9017841312479,"2"
1672.065186,136.860168,101.264099,993.053467,835.083801,210.463791,110.482155,972.178894,FALSE,14.7864394348652,5.69422173440213,"15"
373.780182,117.484344,231.588074,78.477348,158.334641,18.599392,63.689674,7540.369629,FALSE,-37.0627098497836,20.808581330348,"25"
172.54129,32.069935,203.154236,121.336792,69.381943,107.063225,59.400505,2196.626221,FALSE,-18.6390537803277,39.9857598528697,"28"
353.99411,111.547234,246.117783,1073.507202,797.342651,252.491653,5.103431,2564.10498,FALSE,-0.499804610995825,4.66168513790859,"29"
18642.195313,168.589233,198.477325,3788.58667,2321.410889,-134.747742,34.227154,181.710358,FALSE,-6.06238627229891,-44.8119588170908,"1"
1424.723999,44.177856,93.414726,80.457062,853.063293,501.275513,-28.090395,196.114685,FALSE,2.43773317404728,10.860439047543,"20"
974.833557,-2.696266,209.329376,76.194122,295.763733,1038.854126,15.65579,2.733261,FALSE,-13.5921236439874,-3.33608933989364,"31"
5165.783203,169.22963,229.955383,11.012125,341.465668,503.212372,46.603634,387.169617,TRUE,-30.0325094271964,-24.4503283441946,"38"
22899.28125,171.111832,143.878769,1984.640991,1299.233398,57.837227,19.136351,248.30368,TRUE,-8.69708297812595,-43.8307200087474,"1"
21573.595703,75.166,231.495483,2600.657715,1705.448975,-80.810768,190.71019,688.222046,FALSE,-11.2871654097686,-47.4283034847956,"1"
443.490234,182.362457,221.246048,50.784657,210.100983,199.664703,75.535995,5137.429199,FALSE,-30.0855720203064,26.0716677033629,"10"
10104,146.700195,212.65625,3929.723145,2049.72168,1.280775,84.057365,-111.195564,FALSE,2.03939459091886,-47.3935483018342,"2"
3383.547363,142.279694,212.232697,99.340149,-21.481441,110.920265,-52.460434,6937.552734,FALSE,-34.7607061988551,-5.42354521428949,"27"
141.079544,88.584038,296.059082,45.772705,2260.143555,1321.284546,-10.506886,8237.181641,FALSE,-21.2750962550464,-29.4718049940392,"21"
20000.177734,169.086044,331.519684,1930.427368,1915.426147,-58.312927,62.947861,483.18573,TRUE,-7.52968445435698,-43.9254481885258,"1"
10498.329102,211.876694,279.8172,4159.403809,1293.542236,81.173508,-34.733932,-23.328749,FALSE,3.05803799422602,-45.351289809937,"2"
489.765594,92.236168,226.178146,247.078156,427.625763,178.188385,23.162165,2708.702148,FALSE,-15.1951198488517,24.6450165840479,"10"
3749.581543,142.51683,241.138016,653.716125,1531.334229,110.140167,68.504784,1320.380127,FALSE,23.6595834055839,-23.9281858393404,"12"
241.601624,208.106186,175.219879,66.401466,300.702576,104.448959,71.058472,565.988159,FALSE,4.80562308039476,38.8683918360514,"28"
-150.65976,117.281525,242.567566,143.560394,115.950256,162.358551,7.766252,9351.597656,FALSE,-37.2066480433797,8.88633137853819,"25"
12176.083008,83.862099,121.336754,2635.030273,1229.866333,13.572762,47.49728,775.597961,FALSE,-4.32528176527826,-48.0369727531946,"2"
116.530067,181.06308,184.517044,245.127762,1229.235352,139.706558,-14.33321,1999.308838,FALSE,2.03506333330715,3.14442926490379,"29"
740.17218,189.781036,145.015228,86.810371,262.5159,591.499634,35.035126,4531.172852,FALSE,-15.5206073151559,5.35115014954358,"26"
22344.212891,145.876221,77.525314,2561.15625,2063.803223,-24.768763,-45.852665,-33.723114,FALSE,-9.73216047478349,-44.826471955551,"1"
333.124237,83.383446,83.698921,211.21051,388.731262,1147.072632,25.053366,-228.171997,FALSE,-15.4150291930921,-11.6352202742189,"31"
5532.580078,31.055441,140.554077,1139.607178,1269.098389,38.871441,4.745346,-154.748154,FALSE,32.6904119420109,-31.9425146347709,"2"
399.081604,135.209381,145.728531,312.024628,244.904327,69.659081,123.287788,709.442383,FALSE,3.02606452811125,38.4864973243462,"19"
-0.964168,38.404221,171.606125,307.834534,189.009613,207.348831,20.883413,2390.884521,FALSE,-15.4667996393925,29.843010826115,"10"
-109.024292,47.696857,233.010925,721.359436,418.049133,101.536224,22.090834,-7.595496,FALSE,20.6273852842967,17.7105879235814,"29"
111.626953,34.291687,258.101166,187.451706,1957.615723,1159.604736,1.957035,7143.166504,FALSE,-21.2264009724063,-28.3383052914145,"8"
357.620728,193.646484,162.427612,660.988892,2171.910889,37.588329,46.28492,747.548889,FALSE,6.55175718790835,-8.90166668883654,"29"
-10.962276,48.928146,153.080292,386.592712,601.023743,77.23307,77.337837,3810.307617,TRUE,-10.2878005055641,12.4941056304207,"10"
734.957336,229.319534,226.574234,276.955536,316.025635,2375.122559,40.146824,3908.477051,FALSE,-19.3398179856326,-39.4008310849041,"18"
295.928894,71.981476,300.934845,3947.744629,974.061951,160.215576,-39.426258,1742.054321,FALSE,34.6685007762585,6.35056480432368,"11"
14289.450195,152.089279,189.653015,3183.447021,1744.416992,99.611412,82.591675,397.822083,FALSE,-3.98049462093849,-46.2448930015944,"2"
1370.680298,179.471832,229.665421,69.140137,103.663055,115.052376,-27.04315,12950.657227,FALSE,-41.1816430157384,-4.21940581102064,"4"
1449.266602,205.070221,151.270828,241.184738,136.678482,440.863007,35.740108,6354.577637,FALSE,-25.0970297297382,10.3993609923611,"25"
315.089905,222.021545,300.430023,322.244049,112.932129,509.406708,33.289051,13307.214844,FALSE,-36.0205591142855,-10.2162684865231,"25"
688.38269,158.329224,216.401901,710.641418,512.989441,108.907372,50.076328,189.928436,FALSE,20.0725835994787,14.5181752281763,"29"
4018.299316,147.305054,186.505753,70.576233,288.236694,269.429657,131.099075,2634.474854,FALSE,-26.5359454859923,-5.09859855633375,"36"
3122.088379,183.712677,215.435562,133.970871,182.933762,488.084412,82.965164,2041.234985,FALSE,-16.1461218513613,12.5896431741029,"36"
3742.549805,208.227097,412.275055,351.517975,4.142625,-21.294346,68.596352,5921.081055,FALSE,-33.4411909181558,-9.63119829281104,"27"
438.798004,85.13102,173.372101,91.717102,-14.15736,109.738953,-16.5156,6386.371094,FALSE,-32.335475372533,20.8498590670108,"10"
464.745636,80.953445,175.045898,133.168457,178.648972,173.711441,114.056602,72.102127,FALSE,2.61658617001721,42.0406929560662,"19"
389.421295,197.594589,180.604279,119.019447,84.633133,288.413055,10.302629,305.323883,FALSE,9.73134506933987,26.0775826078685,"20"
61.781151,159.842331,278.533112,594.506165,1394.189819,224.56691,68.442352,4584.750977,FALSE,-11.2665859710498,-3.52651814315524,"8"
266.37735,67.679489,201.136429,64.835823,294.322876,59.490307,64.655083,96.649475,TRUE,5.55512142296615,43.8011858254006,"28"
26250.560547,131.973816,123.464638,3999.134033,3142.075928,-7.122368,101.620789,154.061752,FALSE,-9.08992635232683,-43.2761716382115,"1"
236.368362,97.188637,209.856308,215.308929,700.701965,51.452549,47.699471,1613.08313,FALSE,5.67409472771424,14.6220427642943,"29"
9346.194336,155.044586,198.773666,2620.413086,2703.983643,27.422869,-23.678122,-37.84845,FALSE,9.14756776105623,-46.1017925761639,"2"
2730.794434,107.801926,197.664902,106.052948,662.2771,777.825195,-14.146081,3032.936768,FALSE,-14.5996797479079,3.81801755133359,"8"
191.485596,106.739311,158.236069,221.758652,66.782837,127.248184,75.000046,1069.635132,TRUE,-12.3224925804349,42.0252001960184,"28"
757.453064,129.024338,307.03064,361.082306,1108.516602,217.770065,-15.553376,5946.144043,FALSE,-20.1603223774638,0.0116224100169695,"25"
21.172077,97.889977,187.914963,359.601746,479.345428,227.6716,43.390327,2686.402344,FALSE,-9.50715735572833,15.5890239194019,"10"
315.795929,78.381767,283.142517,847.909607,1666.38623,141.401794,49.479488,5172.820801,FALSE,-10.8488221767566,-8.93476964089441,"8"
5420.899902,167.978714,153.683533,662.187866,1366.002075,757.079712,46.903191,1781.888428,FALSE,3.05204454736831,-27.4734392339171,"38"
210.542328,53.045803,231.521866,551.533875,1503.75647,12.671812,-11.85684,473.908081,FALSE,10.9785185754225,1.64651400981252,"29"
165.339844,165.335281,165.851837,392.147552,713.396423,383.343842,21.795521,1399.629395,FALSE,0.842580668401885,10.9046431885519,"20"
211.786255,95.314308,209.478699,437.490875,954.848572,85.213776,-16.70919,351.213776,FALSE,14.6436104536246,10.7230713491738,"29"
24397.037109,118.308586,114.7873,1636.949463,1406.736694,-55.690422,24.761444,425.145752,FALSE,-7.91136080459435,-45.8179073674094,"1"
486.758759,37.987614,142.875473,86.298828,2721.237305,1006.456055,162.92186,4717.585938,FALSE,-15.2839895264754,-29.2825088167359,"8"
724.963257,91.965492,259.018341,247.953461,17.417522,486.99057,38.73315,3466.516113,FALSE,-14.1500029158115,12.5430301066687,"10"
6418.550781,118.643944,164.959351,1710.714111,1250.072388,-16.263014,-41.898724,186.152374,FALSE,28.4398452185253,-37.3876324738083,"2"
158.561096,231.058655,121.060913,210.492508,140.055695,98.575729,80.229942,321.093445,FALSE,8.12346705027461,41.1567179584128,"28"
4721.211426,113.468605,153.075043,1583.356445,2137.593506,51.370853,36.090309,4071.018311,FALSE,12.3642772012447,-34.2208469998577,"13"
942.535034,141.537857,332.238312,91.043312,-47.203941,74.746361,-13.565873,7666.57373,FALSE,-34.4451463062302,15.3849184746117,"25"
6697.651855,16.323753,206.690445,1594.939087,1856.047974,134.896057,-64.453873,743.473267,FALSE,15.2552353621511,-43.5514656565937,"2"
712.733826,117.60128,238.263657,297.005737,1179.256714,155.757416,130.237549,143.273605,FALSE,9.24353337489569,7.46752498384157,"29"
6562.261719,58.935608,124.298248,203.608887,108.017868,144.272766,5.684532,6841.329102,FALSE,-39.4021234019978,-26.1551313051675,"38"
2212.292725,186.89859,157.580658,46.473011,296.556732,347.665955,56.564472,495.175568,FALSE,-7.76637161283174,27.3079960565942,"16"
240.407272,100.661957,189.062378,71.104553,284.452209,448.52243,92.201523,2476.571533,FALSE,-10.2797248309172,13.1162344391642,"20"
11417.94043,78.518547,115.49501,475.578857,1320.485229,-11.628454,114.459274,360.471008,FALSE,-4.63933505345479,-47.9281829014436,"2"
9493.21582,144.44104,142.789093,1701.780273,1426.349976,-35.264236,31.84153,453.222504,FALSE,0.944444387382852,-48.594338641123,"2"
102.899284,124.874504,199.364853,289.780823,913.691956,445.731232,171.482056,382.74707,FALSE,0.72405974819393,8.40293751200746,"20"
2224.153809,61.216503,218.06279,734.511047,1210.398315,337.489166,0.051729,2192.475342,FALSE,1.20128865561231,0.285886294009599,"36"
-10.849492,37.405296,154.002563,560.57782,479.364136,84.547737,37.535393,2259.364014,FALSE,-1.83784887520992,15.7846302833168,"29"
79.321869,78.61644,82.846611,258.971222,927.28363,190.845291,62.61351,239.63858,FALSE,10.0710192573083,10.0740185873014,"29"
148.407684,78.217979,193.226791,25.737509,542.743469,492.524841,8.943328,25.943979,FALSE,1.03849448139104,14.6398025240197,"20"
-94.218643,98.750938,216.008575,256.620361,813.412109,1788.325928,-15.41601,8657.652344,FALSE,-23.5402545790429,-35.2253205389379,"21"
12370.429688,123.342239,355.023651,38.014523,240.859833,235.716217,75.724197,3595.054443,FALSE,-35.3757749701759,-35.3379565722253,"5"
3041.976563,196.109818,196.868515,172.131485,1984.893921,143.454468,104.188866,2842.80249,FALSE,-0.8287146229576,-15.2372555375488,"34"
27086.744141,160.291946,191.893723,2692.645264,2794.634521,-170.909897,91.43988,1084.107544,FALSE,-11.5039318750349,-45.1067249484095,"1"
2347.831543,98.124924,200.867645,997.714966,896.854797,-18.631718,268.959686,2896.082031,TRUE,-8.02922926734915,24.6336779310948,"24"
11830.705078,153.507446,90.86161,1614.380005,1838.224609,42.090046,-14.955302,263.399414,FALSE,-1.25211608772611,-46.2142658637904,"2"
187.063721,48.573166,196.063919,321.489868,695.489319,37.993679,50.137295,5534.515625,FALSE,-22.9053793113975,7.90921286463905,"10"
-38.099911,99.118614,115.959023,81.67849,530.510681,501.143707,77.180695,224.689407,FALSE,-0.707890204951356,13.309352740144,"20"
277.94574,74.768867,163.28862,1010.180969,1008.438416,193.316666,100.787407,-38.11174,FALSE,14.3372849454,8.60912972624318,"29"
708.948608,188.572464,287.84787,250.22023,196.109161,125.948402,0.528417,11444.90918,FALSE,-36.7707184209463,-3.39690508779328,"4"
1369.494751,99.421341,404.950867,70.852486,519.717773,52.780987,-49.746468,16601.169922,FALSE,-47.1879968465135,-1.43900766707521,"23"
-177.934113,15.630203,127.93779,127.719093,131.776367,967.149231,89.158043,56.823215,FALSE,-9.45076954785262,-1.28559644668069,"31"
1044.390869,143.451523,333.140747,78.887627,19.806259,51.633354,46.621521,8876.642578,FALSE,-37.4509331706532,11.1297564025756,"25"
1182.725342,84.099533,223.492081,404.612701,574.680908,279.59198,79.026955,1415.675659,FALSE,2.86538063028539,20.5286386819927,"20"
325.554718,97.670898,239.484772,882.562195,755.646301,25.736864,33.72757,47.701862,FALSE,21.6113762453159,11.8765231320896,"29"
12498.142578,97.323944,224.791077,2485.044678,1635.074341,-33.008812,61.389286,285.916992,FALSE,-3.10514612699651,-47.1633398379505,"2"
9975.855469,148.53009,221.096024,64.823257,321.4888,26.674364,100.685883,5360.401855,FALSE,-34.9186738509884,-34.7116018401989,"5"
286.016205,52.881031,198.460693,205.299133,726.047607,160.776855,-7.081319,-215.87793,FALSE,15.6556639791407,15.6162509102264,"29"
1135.494629,47.057106,237.033249,184.811081,65.44017,94.769592,152.94899,5656.358398,FALSE,-30.4135218289824,21.2719455306017,"10"
78.435867,56.660851,246.186981,439.080688,1344.335083,141.744385,52.770119,4306.138672,FALSE,-10.4268367190263,-2.384694823172,"29"
690.410767,140.960297,195.694717,734.107483,1394.278687,80.556107,-5.58456,821.696045,FALSE,11.2528491440876,1.49269492385733,"29"
8013.412598,84.997414,158.729263,69.908554,148.619598,92.747856,60.776985,6037.497559,FALSE,-36.8099766254825,-29.8410583004076,"38"
322.927338,127.316994,229.506439,158.586014,377.534149,796.975037,47.52327,378.410278,FALSE,-7.62332454885327,5.53090485006695,"31"
3975.098877,48.278004,262.600677,164.721725,60.666355,93.949905,27.08037,11681.574219,FALSE,-44.1446865033038,-13.7569970002165,"23"
18244.65625,134.827286,166.94957,3284.44873,1313.008179,-33.933327,70.342384,512.899902,FALSE,-8.84896756316375,-47.6938326776738,"1"
2641.9021,211.166504,259.684296,879.955627,2098.010742,139.754761,75.391479,374.456573,FALSE,15.811663168368,-24.1469956971868,"6"
207.110001,107.989159,163.919556,183.907013,-172.015823,120.329697,37.773312,742.702148,FALSE,7.23394874711744,38.6832277819891,"28"
21369.826172,270.750092,130.297699,2679.810303,2380.548584,-26.272854,-15.392367,509.675598,TRUE,-8.10236493167497,-43.6471906408993,"1"
10870.413086,200.82077,185.574142,3389.614258,1375.388062,-32.827942,-2.077709,-144.625778,FALSE,1.06822416007719,-47.1895710920771,"2"
404.443817,221.499084,240.288727,1147.317993,1753.001709,422.420258,-17.038631,1164.031372,FALSE,2.29853245956277,-2.94174438527952,"29"
5548.550293,140.341324,146.649872,614.535156,1641.595947,27.06917,28.82472,-276.327393,FALSE,26.3678119171074,-35.3738653102427,"2"
346.352875,87.620461,125.838615,1219.906616,1025.112427,163.381485,-16.783165,2564.619629,FALSE,3.48264140179851,1.05214272011908,"29"
17253.183594,100.463058,200.819458,1672.337158,1549.958252,-9.360342,-15.841659,212.388382,FALSE,-7.49276140724647,-46.0244620641741,"1"
185.696411,147.929428,241.023178,847.96051,668.623962,439.46936,46.256508,6595.870605,FALSE,-19.8995599493508,-3.81690410204458,"25"
10306.443359,95.534996,183.132599,3289.808594,2227.475342,124.790146,-4.078197,201.823166,FALSE,3.31384721446026,-45.4260998759946,"2"
-58.692715,105.251686,140.313049,590.404907,1731.927979,792.001831,4.222981,4769.868652,FALSE,-13.0389570891438,-19.3354729767568,"8"
53.300503,53.165051,165.123199,398.107391,11.786294,77.154915,32.985428,2853.577148,FALSE,-21.1360624719164,36.5438115778485,"10"
12598.783203,109.668739,171.887482,1522.49585,1497.343994,-27.065777,18.078392,-236.558105,FALSE,-3.78281056344203,-47.5708749856676,"2"
482.010712,380.971161,941.410095,1064.884277,2227.704102,449.991028,-63.924057,3611.550781,FALSE,-10.2955711122641,-13.826089802382,"8"
2629.001221,185.059204,211.668518,1618.748169,2259.095703,109.59964,100.407501,3820.713379,FALSE,4.88604936451852,-19.8926017158332,"13"
890.09314,90.938736,160.31102,104.887939,172.046677,83.351128,-15.160055,154.204865,FALSE,11.3190701657901,30.024653914995,"16"
-88.72776,102.614449,216.361603,163.571274,1059.789185,91.637772,120.0336,66.476013,FALSE,8.96245248516504,9.28076919291188,"29"
79.560051,101.20356,106.285507,135.78717,508.606812,359.285248,102.581985,-46.715282,FALSE,6.22193368239048,17.1637030416076,"20"
572.850281,175.56749,174.227158,853.202087,588.848877,48.530457,-3.236486,-106.898735,FALSE,22.1402100677954,11.5678964170105,"29"
2087.065918,81.771034,176.392227,62.933197,98.991226,42.82386,78.525276,1983.657837,FALSE,-11.4716540462502,23.7978543915354,"36"
9.575477,126.712593,170.478348,234.937653,667.957947,525.64917,155.694641,2189.424561,TRUE,-6.2695319552214,19.0925182324114,"20"
528.783447,108.377144,127.536499,166.385452,-164.347168,293.84201,19.432821,27.470745,FALSE,10.9787209930918,26.4393798715442,"20"
90.446625,240.503235,297.641785,106.668015,449.754364,216.817627,70.480812,100.660973,FALSE,11.2838015247745,24.7651060381506,"20"
9928.291992,39.912334,237.421173,1557.887329,1458.120361,14.011184,-59.644646,-101.041168,FALSE,0.566342454102068,-47.9873240027006,"2"
14.942686,99.276985,185.989059,189.143356,497.246002,32.862434,107.004303,-122.59996,FALSE,14.3713966075789,22.9569890375729,"29"
2534.505859,198.849899,118.233452,136.107925,-10.747482,32.280392,88.855492,6062.530762,FALSE,-30.2162032054388,8.15105564398176,"36"
5902.49707,143.931595,121.41433,2990.178467,2204.453857,18.686827,46.369217,107.996857,FALSE,33.150806893942,-33.4565728318919,"2"
245.967361,155.84314,293.32608,423.431824,254.339188,64.620705,-30.085112,-54.133816,FALSE,19.9456880179011,21.3001732587776,"28"
628.900757,30.21586,283.497833,401.873535,1171.402344,61.700687,43.222916,253.026794,FALSE,12.7312322690183,6.87796398289101,"29"
189.558716,80.054665,231.671097,1727.847168,210.163437,206.172379,25.158201,1376.079468,FALSE,18.8360428794872,12.6566159892421,"29"
1132.186401,134.717239,114.797859,332.349213,705.97821,106.047058,29.612923,1661.0896,FALSE,5.74589822965222,12.4807659114003,"29"
761.33374,89.686493,175.806808,164.548492,318.027863,275.088165,-5.593408,26.414379,FALSE,10.0451762422009,26.2531996039113,"20"
2568.688477,-41.419563,126.120964,701.650085,1002.094482,215.797897,12.697491,2157.968506,FALSE,3.40771053230018,-3.54274952884664,"15"
20308.210938,97.835152,176.643265,3697.621094,2343.666992,-10.935976,106.213577,421.092834,FALSE,-7.21718472843179,-45.4713675960055,"1"
63.332653,140.827393,171.804428,276.737732,486.082825,185.086349,108.462456,159.442047,FALSE,11.6110359781697,21.106245029486,"29"
7201.785645,147.583908,225.023163,2237.823242,1724.456909,11.316116,9.859643,323.83313,FALSE,18.9089296343545,-42.2055070184278,"2"
334.265594,50.814072,222.385757,280.179962,396.628906,164.731247,-41.740952,400.956909,FALSE,17.5881332313606,21.2511766812852,"29"
512.011658,210.010529,186.811798,803.038574,836.673523,358.363556,8.368991,5490.52002,FALSE,-17.6411989915526,-0.387850784100058,"8"
440.46875,206.950729,217.258026,140.623093,451.068329,365.087067,114.535622,919.127136,FALSE,0.46091596880468,18.3253300925251,"20"
7120.396973,112.231834,157.065689,1967.741821,1591.617188,21.395176,182.714645,-375.207672,FALSE,22.3335454991103,-41.7722177764432,"2"
2324.961426,100.759872,266.132904,2.646056,72.53849,526.551941,37.444675,-65.56057,FALSE,-10.4273749328607,17.2776394450214,"16"
1000.299011,73.150421,233.998642,112.054276,44.210766,466.946472,29.698696,3109.174561,FALSE,-13.9374653770692,14.0084451221257,"20"
986.97052,220.032776,228.442459,231.011185,369.767731,57.432171,25.372486,507.734589,FALSE,9.64214449532924,27.9122080177385,"16"
310.397034,11.648254,124.688759,678.171753,1342.432983,209.323196,-18.813349,1742.924683,FALSE,5.05190841866467,1.44490286797061,"29"
412.189148,104.651878,184.404694,951.675415,1316.968262,213.223969,121.358574,7410.141113,FALSE,-19.1915382012608,-10.1858819118123,"25"
224.9599,165.82106,139.670685,353.329041,-187.435547,150.947632,26.114702,387.310455,TRUE,12.779936909507,36.8171756220737,"28"
19.021177,64.079384,291.972473,181.395096,351.520935,128.929871,45.498787,309.71106,FALSE,14.576400180667,28.8837687312352,"28"
174.763855,124.620827,253.799988,320.71463,-8.822266,581.502563,100.668541,214.834946,FALSE,-2.44793775605661,14.6528174446285,"20"
2946.678223,176.35437,255.379181,105.107613,109.52832,21.994421,31.229759,8881.176758,TRUE,-39.9882929099937,-12.0409524607242,"27"
36.861633,103.569763,187.015091,964.012451,1409.239868,185.127151,41.435162,2446.020508,FALSE,1.23468280397039,-1.61313390989537,"29"
67.955215,90.270737,263.484314,433.110474,330.509796,152.647705,48.047977,-156.152481,FALSE,18.6198473165493,23.6836748338688,"29"
1096.535034,117.987961,159.354568,243.682312,-1.608671,90.750641,100.154137,1260.723755,FALSE,-1.06615447311405,34.0146972255968,"19"
6573.384277,229.284393,401.826904,104.658485,209.262863,155.041351,48.484982,21306.746094,TRUE,-55.0899956727115,2.08488771859641,"23"
992.599365,83.320824,289.871185,381.52655,512.888245,371.881561,10.96391,3595.274414,FALSE,-16.6314734906754,14.06884047413,"8"
5584.408691,154.595306,210.638504,115.498779,2.605987,148.936661,29.716866,8660.212891,FALSE,-40.031693458496,-22.1887709193071,"27"
419.818512,109.253265,215.054062,253.108582,161.840195,95.509071,-10.619089,327.908417,FALSE,18.1336878844162,28.6561975886698,"28"
11381.175781,50.331818,229.006531,3252.839355,1666.312622,-84.703217,53.538059,277.379272,FALSE,-0.643363268853988,-47.8352586657441,"2"
6836.889648,150.740173,253.878265,1521.132446,2126.462891,-66.569695,119.535965,921.059692,FALSE,17.7403575399622,-43.2851687415601,"2"
496.815033,48.431366,168.653076,214.922638,1141.017456,696.598511,-3.637297,4420.095703,FALSE,-14.4690374627765,-7.60072067187627,"8"
13017.667969,232.023483,198.999741,2398.870361,2295.939453,-15.393037,41.478596,80.666008,FALSE,-0.474800422334714,-45.224319540394,"2"
-2.82374,61.645493,110.064453,995.220886,1178.030762,32.252888,124.152565,632.296204,FALSE,11.4777125770756,4.22787999481658,"29"
298.359467,190.223694,347.335571,228.120285,385.717499,875.051147,43.679108,679.563171,FALSE,-9.78576838553486,2.96154744006447,"31"
174.273773,111.421577,158.648392,202.405029,563.725891,641.470703,-5.868251,-1.98463,FALSE,-3.70284242936691,9.5819576691046,"20"
8570.108398,79.934669,167.442963,1427.639282,1482.972534,81.162468,22.649199,42.00856,FALSE,3.74976842621116,-48.7656431911223,"2"
83.898582,75.873436,211.780746,690.413757,630.71814,602.453125,62.96608,3997.390381,FALSE,-13.6898092523761,0.017387772521374,"8"
17874.199219,160.213959,170.884583,201.516647,135.983902,-42.198235,-0.210948,640.25824,FALSE,-22.2041148618298,-39.7162079165073,"5"
8591.602539,95.423012,139.533829,1536.70813,1471.56604,-46.066208,27.040857,331.679779,FALSE,4.49907145336521,-48.3894647117882,"2"
237.05899,85.486717,173.443069,219.290665,77.185371,26.267246,7.639786,111.045746,FALSE,18.3519516221599,31.2639278021337,"28"
285.183411,242.210388,267.945831,343.986633,-31.295094,92.843895,71.461479,985.185608,FALSE,0.254350878973242,41.5059079463997,"28"
215.221039,51.360096,221.375641,332.572784,894.71698,399.866791,24.686352,1954.888306,FALSE,-2.19190384707122,7.14125340632878,"8"
3445.963867,280.969116,519.534607,244.815247,122.166672,151.16275,161.913666,9109.358398,FALSE,-41.046962016379,-11.9214899181646,"27"
494.819214,68.139885,245.784546,207.281372,435.257721,110.959229,85.431503,307.030121,FALSE,10.9695199188443,30.2227961999925,"29"
8461.439453,280.082062,172.482117,5288.103027,2857.397705,91.225845,-75.271965,-365.358551,FALSE,14.3471041920966,-41.6131513896913,"2"
14.4849,154.104202,207.775558,131.936539,235.981476,136.451401,32.446812,357.2612,FALSE,12.8363903648629,33.8487381082571,"28"
187.022446,147.083557,208.500992,117.604477,59.718845,126.314445,48.872833,1357.094116,FALSE,-9.07570952684908,40.7754277393845,"28"
623.468872,175.676132,329.370758,125.627754,10.746016,5.530862,7.273222,5224.446289,FALSE,-29.8237382439408,24.1496171546142,"10"
22099.451172,138.406769,137.316208,1548.738037,1519.470581,-175.661697,73.069427,219.223389,FALSE,-9.16427469366042,-46.3438897595691,"1"
6343.358398,221.806335,257.528534,302.247833,-37.028042,749.560486,55.561787,-83.786804,FALSE,-23.9464911237951,-34.2441561307614,"38"
1152.800781,109.141266,501.150757,213.379654,-185.337723,138.895645,27.297565,26254.939453,FALSE,-50.9138664133391,7.05618554386874,"23"
6452.154297,283.930481,277.92691,262.014954,87.543182,57.793781,76.486588,14278.427734,FALSE,-46.6676333234764,-20.301656060668,"23"
1682.304565,106.209167,162.868713,220.340805,203.868332,159.079681,25.67239,6415.183105,FALSE,-30.1484184228372,17.5729141373027,"25"
492.573181,80.498535,164.096191,256.414337,844.493042,241.530228,44.823326,1015.59082,FALSE,8.75684081520552,11.8184822129279,"29"
144.319031,5.455846,198.75946,82.036255,443.192291,898.885986,18.379927,-114.542091,FALSE,-8.97477176944554,1.85394241561023,"31"
5359.499512,31.102476,220.895966,115.268356,194.392563,4.400241,41.860226,3819.318115,FALSE,-33.2812441285842,-24.2050668962236,"36"
340.94046,184.116714,240.963593,554.901917,1172.632202,106.209427,94.397697,190.209488,FALSE,10.7269672718026,5.70006057836445,"29"
649.692139,76.899345,284.019836,272.029175,852.160767,187.009857,217.250061,838.512207,FALSE,5.76079056311897,13.4864943793956,"29"
161.114899,167.734467,129.076935,560.486084,1069.53479,162.522522,47.59058,1246.752686,FALSE,8.18650832849947,5.97197412673651,"29"
1350.46228,94.525597,193.236145,14.678614,204.381134,223.083496,0.83686,7653.838379,FALSE,-31.1126023970776,12.1208625259726,"25"
-31.463329,117.900826,175.88974,209.201065,450.97699,518.221069,70.117836,908.140442,FALSE,-2.4503433137737,12.6814976325704,"20"
288.696533,100.043266,209.233612,1414.020996,277.651794,106.725021,-0.96871,7851.141113,FALSE,-27.1806840930622,-5.55874515282521,"25"
1251.65625,63.649494,324.435608,683.319336,729.828918,490.580658,-1.44033,7459.53418,FALSE,-23.6728701134454,-3.77313054222586,"25"
405.18631,126.445808,134.185349,54.735786,333.868896,241.298798,0.550616,37.77396,FALSE,11.1317536436536,26.5998815569044,"20"
2377.51416,89.261833,128.929733,667.910034,1703.936035,179.756088,80.958466,3749.161621,FALSE,-5.14750558325033,-8.85711400366782,"13"
4653.072754,112.665405,221.312592,199.259399,-23.863138,23.820538,58.615982,9784.75293,FALSE,-41.7871704928056,-17.7544770124262,"27"
1405.852539,108.368492,276.490143,81.764168,347.795959,126.553902,70.356445,9818.833008,FALSE,-36.520460625423,4.25029380453961,"25"
1767.219971,164.968048,164.65271,1627.075684,1920.773193,76.546486,42.573818,73.49585,FALSE,23.5988465476336,-13.8742989845429,"12"
326.407776,64.347176,120.3909,1274.422363,810.628601,200.348831,16.327051,187.556549,FALSE,19.1953282136482,11.1171578086607,"29"
652.261353,71.713982,104.062737,351.905243,1019.673584,158.518646,108.575928,127.807045,FALSE,10.1304500865123,8.97312678511702,"29"
14.986117,168.766953,93.138748,197.133652,93.959282,187.204926,105.448944,577.879578,FALSE,2.36778804378259,40.2573473003287,"28"
355.999847,184.969193,211.917664,307.937469,118.929817,-37.471485,69.344582,3495.349121,FALSE,-27.3659484259117,35.4326423379819,"10"
929.509766,141.360123,337.376282,185.462936,136.519821,153.512054,47.887753,638.851501,FALSE,4.65784457422314,34.2685111501021,"16"
8763.169922,48.762604,201.442062,655.56665,1362.8125,126.140793,86.602913,369.621948,FALSE,0.546370342946376,-47.847330964397,"2"
-7.818222,47.254868,84.361382,307.592163,1167.727417,183.670273,56.865135,6590.896973,FALSE,-19.617054294391,-4.39815301953178,"25"
141.94046,163.266846,328.243256,369.498322,2517.837891,203.072723,170.316864,32.889656,FALSE,3.4830460503773,-10.0649339672409,"29"
16920.835938,73.081818,188.460114,224.237152,-137.367157,170.613739,138.278412,783.300842,FALSE,-29.389175165924,-38.1036575138034,"5"
122.658875,131.13324,123.023834,231.619766,536.603577,324.701172,72.469833,3343.710938,FALSE,-12.0513621981359,10.9854472549966,"10"
300.388306,93.184196,141.621872,561.108398,916.731323,95.34874,66.123207,313.448486,FALSE,13.4765915444288,9.86769245040295,"29"
2457.94873,134.37262,183.234802,95.918877,200.888733,35.378597,34.418617,9669.725586,FALSE,-38.6235721996186,-2.56215059001734,"27"
1144.570801,134.726746,238.34761,108.609032,287.280151,351.876129,-26.518887,4465.163574,FALSE,-20.8085228053808,15.5194526904502,"10"
960.228455,103.480232,134.314056,344.092651,842.118347,252.508026,17.835131,787.632751,TRUE,9.85024425585497,10.0910933009724,"29"
1026.508423,198.881165,109.883369,305.109314,1115.573486,1588.490234,69.923569,15638.317383,FALSE,-28.7620740969806,-25.2561995315914,"21"
44.393898,25.2192,196.274612,133.449539,207.693771,116.418388,48.500519,1788.779663,TRUE,-16.3479940239471,37.9796241632359,"28"
387.424469,122.143402,227.216171,137.364288,28.701227,126.739426,117.51049,8994.34082,FALSE,-39.6355135560317,14.2833982629737,"25"
309.347137,30.585617,267.384888,79.994453,256.703247,-15.043925,32.681385,2489.006836,FALSE,-18.5953984682545,34.9992108011321,"28"
307.320923,74.411438,129.130447,325.816437,538.529419,151.035645,20.515879,-209.746704,FALSE,18.0764231638609,18.6002465577661,"29"
-17.626654,184.923615,190.223236,139.973511,-101.902,59.806011,-12.805243,706.800293,FALSE,13.7620349425839,34.4787952867524,"28"
224.427567,65.345909,242.073273,1227.747925,1220.972656,74.083542,10.954056,1546.141479,FALSE,11.8002802113332,3.64169949142359,"29"
32329.207031,219.688858,236.224426,4032.956055,2628.881104,52.150681,4.375637,-239.878632,FALSE,-14.5247996486178,-42.6837217449043,"1"
10021.130859,135.61554,207.479446,1057.63208,1173.882813,-47.471317,2.608932,180.840332,FALSE,-1.51667708846598,-49.1098153996424,"2"
9026.443359,263.244141,325.174347,2896.417725,2268.432861,63.995739,-5.020725,466.451569,FALSE,6.93942769721825,-46.0736411633985,"2"
1286.503174,142.851593,233.417786,122.160469,291.231079,86.457153,0.014344,3472.953613,TRUE,-21.6985610630176,23.9232635781968,"10"
614.959717,119.318954,150.764099,252.596985,544.757751,830.249023,15.147696,603.731079,FALSE,-9.86388256276924,3.96692280601987,"31"
132.911652,154.606277,165.739624,1437.349365,1539.694702,171.736862,75.849319,1781.362671,FALSE,6.03165062773474,-2.17528829260191,"29"
16630.912109,214.252991,189.167877,4853.692871,2163.618896,64.242256,-11.386198,369.028625,FALSE,-2.35337793632429,-44.5232713028079,"1"
4287.730469,123.215019,231.152802,68.715424,-66.817055,67.242218,43.889099,7520.587891,FALSE,-39.5708362206639,-17.6649345481859,"27"
24146.238281,251.438721,104.886879,3972.255371,2670.384277,-24.961309,109.647896,-367.480011,FALSE,-9.40437379845623,-43.8769187406469,"1"
924.142029,121.363213,187.343628,91.06205,-26.313217,66.447739,52.382965,11180.078125,FALSE,-38.0971651717785,-1.13241774078888,"4"
-159.269333,175.093582,319.300232,261.067261,558.227051,351.966248,35.518681,1095.750244,FALSE,2.85227225676589,14.6781336419492,"20"
1.512874,113.946625,215.732208,259.184418,516.250305,163.215271,111.316383,502.833313,FALSE,9.74828027916379,22.2202744728506,"29"
13974.262695,167.563919,218.622086,3839.554932,1842.333252,-43.832664,72.448914,-318.494232,FALSE,-2.87035432911012,-46.2159050011337,"2"
96.480194,156.852005,293.024597,724.994568,1623.865601,2282.501465,37.426975,12146.054688,FALSE,-24.3440472061645,-35.0652568411493,"21"
3138.357178,52.547428,301.864624,150.000046,-84.473106,578.748108,3.520323,178.521027,FALSE,-14.9855237517865,4.62378521717532,"16"
173.886658,103.924309,158.334091,173.964401,139.413452,74.768661,68.633575,-76.006424,FALSE,12.163137015879,38.7192846934652,"28"
375.586853,158.716949,240.589447,171.968887,276.118134,1306.527954,-29.413717,6092.499023,FALSE,-21.0240979052701,-30.1227243659094,"26"
1052.681641,252.526794,222.057648,1802.998779,2028.846313,87.973335,2.659611,210.928085,FALSE,20.0086320903619,-7.44276799203272,"17"
15268.080078,10.930069,91.49646,1258.226563,2112.610107,-97.181602,-37.512383,15.827661,FALSE,-5.2745277648413,-45.5241381478992,"2"
1584.346069,152.619324,335.835327,419.24173,-191.69136,537.623352,25.904552,315.882813,FALSE,-4.48996312346155,16.8758281555354,"20"
402.72937,205.846497,205.51564,1300.231201,2103.948486,130.251846,56.085304,118.044975,FALSE,9.57289489198851,-9.10870118060522,"17"
2567.953369,161.082413,298.061188,66.715752,-7.387637,34.959305,15.046692,11348.834961,FALSE,-43.3642219866743,-9.05492018342754,"27"
10677.182617,236.675034,174.508514,189.400909,23.366957,293.943481,17.919083,408.866089,FALSE,-32.414277071695,-35.1841326566972,"5"
1059.899658,77.395271,187.560867,166.747452,68.512833,88.02565,99.929382,-149.216415,FALSE,3.30427269514945,33.3547334657695,"19"
18.863026,113.711212,267.239624,150.002121,-62.547131,258.540985,145.307693,4712.16748,FALSE,-25.8138334801866,25.8410072119807,"10"
804.708618,134.79982,494.832855,368.808136,1109.833374,785.051636,108.67411,7330.351563,FALSE,-20.9970520590863,-13.8040559329897,"8"
3438.364502,142.744858,161.030884,354.000732,674.826721,168.781555,87.029953,2069.388428,FALSE,-11.0033012067658,0.898771441879165,"36"
447.089874,96.114761,322.967865,150.871613,1048.962402,241.318314,56.582302,13994.893555,FALSE,-37.7260737840322,-6.49811275026947,"4"
1122.904175,122.90374,255.839798,41.944622,284.269562,38.250301,95.152428,7813.851563,FALSE,-34.9200473898971,15.7616708457238,"25"
25044.789063,155.632843,143.57135,2818.861328,1225.00293,-36.658146,1.552444,794.604248,FALSE,-9.2677566325157,-46.7558782469072,"1"
3888.827393,240.000946,228.514786,225.09581,15.454062,265.784424,76.89537,5327.498047,FALSE,-32.2042487849139,-10.4068499767683,"36"
19182.695313,27.394373,132.520905,3109.830811,1896.03833,-119.764427,-32.547874,-263.582397,FALSE,-8.7336741189952,-45.4115181964155,"1"
1200.930054,144.676041,186.463211,882.197327,988.135315,360.379944,-0.715298,3057.963379,FALSE,-7.40337891951896,2.98982563221457,"8"
12380.292969,169.306458,247.708466,4317.977539,2107.730469,-22.73234,100.716713,-208.881485,FALSE,-0.799567126723238,-46.5028221921819,"2"
4955.351563,80.553734,361.184479,9.142348,188.972488,399.542511,154.138977,31166.972656,FALSE,-52.5713404163105,9.79479352491293,"23"
208.036652,92.972038,297.623627,113.037659,542.705811,197.55722,52.272209,241.223602,FALSE,13.0927317276428,21.3929292462849,"29"
60.134998,106.330681,187.023621,1285.789063,572.043823,252.692932,60.305283,4122.296875,FALSE,-10.4709384464027,4.6076528300303,"8"
528.890442,259.01889,198.017609,175.168015,9.437885,386.043457,27.252527,677.936523,FALSE,2.10310280168048,21.0114361502316,"20"
772.977539,100.081917,163.776932,396.644745,296.274536,150.381134,83.469551,1489.903687,FALSE,-3.67944642386116,31.948211260516,"28"
13219.793945,121.348206,262.541504,137.739838,318.754517,43.758114,67.801849,17431.929688,FALSE,-38.3593748129959,-35.6038076782619,"5"
364.124908,93.974907,261.056732,210.174622,380.019257,467.198883,39.675938,570.884583,FALSE,-0.399196405913277,15.7948359019853,"20"
5259.48584,170.061966,232.031769,2061.597656,1258.02832,92.9608,48.269329,50.150127,FALSE,38.9451253476033,-28.8872577627135,"12"
6652.179688,112.953011,213.990845,129.567398,-34.696232,15.617045,57.931435,42.159042,FALSE,-28.3183424296475,-30.7051963853731,"38"
3533.134277,196.455414,249.371567,341.930695,-41.108433,47.345173,151.857956,-112.906799,FALSE,-14.8925460888289,-1.79134525154438,"16"
8387.857422,133.078156,12.672197,1781.216064,1269.821045,6.559084,38.972221,-23.233839,FALSE,6.72485663452686,-48.2080857565717,"2"
351.152649,217.69783,265.422058,459.361633,726.890503,225.120636,84.35099,6171.240723,FALSE,-23.0986958032844,4.29529288270432,"25"
118.886139,80.465111,170.927246,807.077148,364.677216,81.139259,38.899952,646.895752,FALSE,19.536595173516,15.9847104119666,"28"
266.484558,114.798424,222.707474,116.314453,701.551697,61.100952,-0.198672,1605.341675,FALSE,6.14081791919619,13.92330368188,"29"
2323.800049,227.83461,273.501923,285.851746,-77.892082,578.43042,139.965866,4589.728027,FALSE,-16.7075827615238,10.0594554042781,"26"
2224.116943,138.387299,172.976563,148.566589,-61.476601,57.615704,-26.298735,6308.592285,FALSE,-31.1973528473896,14.633646852885,"25"
894.955566,111.982224,120.87175,124.226303,-29.233826,111.199387,22.396116,3452.348633,FALSE,-24.3274784196374,28.1749967711687,"10"
42.332073,43.696854,256.314087,278.176971,808.654236,520.328125,760.948486,3648.437988,FALSE,-5.73326362427372,13.8081461287795,"24"
19148.626953,299.377197,303.455139,5218.418945,2444.602051,34.771053,99.338005,5.449273,FALSE,-4.41062217668957,-43.9117953580544,"1"
741.760681,116.199486,138.924011,357.480164,825.182617,198.973038,14.590385,76.687019,FALSE,14.0055251945431,12.6851873510493,"29"
-59.907616,109.291237,211.785248,249.264175,644.717834,440.765808,192.305237,731.578857,FALSE,-0.818554289342312,12.0506480878136,"20"
1211.043213,-56.777649,153.721283,509.895691,1015.452454,30.409533,46.261478,1156.596802,FALSE,11.4764274363984,5.08757526218921,"29"
309.729523,150.317307,171.514542,781.518494,1536.315796,105.044006,142.461304,935.432617,FALSE,6.91522030141901,-1.10078489457204,"29"
456.265503,125.123329,134.199783,133.371231,786.359314,241.081787,109.867516,-102.779335,FALSE,10.3860194092934,14.6301216434638,"29"
187.400085,29.504217,217.869583,199.742188,164.790405,261.189667,43.432686,3120.904297,FALSE,-19.0632135431178,25.1400882159638,"10"
26549.037109,144.40062,149.931244,3868.964355,1685.999146,-114.277893,-45.166782,-167.841156,FALSE,-13.8591009256221,-45.6582023543767,"1"
1264.999634,138.874588,157.900757,2254.572266,2115.1521,105.916824,50.304108,260.128967,FALSE,27.5844607116651,-4.65222714002626,"11"
153.923874,84.53215,217.426132,117.905273,161.494995,52.827145,-33.181511,878.783081,TRUE,16.5684267168722,24.6176809090508,"28"
1185.079468,193.997818,246.762054,147.792679,336.151672,646.479492,-25.893167,4495.10791,FALSE,-16.8695272862587,4.34152388141648,"26"
631.977844,58.444424,185.600784,152.674622,57.056232,28.947617,114.544769,7512.364746,FALSE,-38.8483481913977,22.7797527948552,"25"
71.937828,65.975685,242.093002,370.227875,1035.934448,733.756653,20.836544,3270.968262,FALSE,-11.6430759597095,-4.76550105012325,"8"
3068.5625,103.840218,81.953705,712.397949,991.917114,56.448055,7.801915,-37.380165,FALSE,25.2671123615368,-18.8705622738158,"12"
1129.986084,187.054428,133.386536,199.087723,12.692113,782.628662,122.708702,198.367096,FALSE,-13.7290339940839,8.91959649113091,"31"
9445.802734,172.648804,246.999023,2050.429443,1887.366455,157.737167,46.65358,302.821381,FALSE,3.4464003381028,-46.8424870986707,"2"
1566.916382,143.050751,202.181259,194.116867,116.951149,402.025848,47.505501,-389.065643,FALSE,-1.92854908338606,23.8790005812519,"20"
5476.215332,78.211754,234.72525,2862.961426,2616.588135,73.290001,7.535519,380.665039,FALSE,28.117820835636,-34.9418888161832,"2"
183.214661,195.456299,243.464951,97.3507,880.151367,342.70343,60.140854,1018.566223,FALSE,3.34429297879983,11.5133442519015,"29"
3972.888916,102.041756,328.714294,23.921148,432.645172,38.427723,79.696487,13963.595703,FALSE,-48.233418820534,-10.7937011507222,"23"
74.385399,89.632965,217.528137,189.328201,-47.406254,1936.75769,5.959825,278.52774,FALSE,-22.2145699475873,-39.2966330225341,"18"
2018.22583,115.872902,162.636276,171.209503,110.253517,-47.556492,15.596011,6492.42627,FALSE,-31.8802523017907,15.317763986939,"25"
635.67511,3.509041,274.421753,69.582443,239.172638,51.675713,24.294794,6078.691895,FALSE,-31.5893607445153,21.2283723210079,"10"
1596.463989,116.261063,218.151855,39.921719,188.897415,68.768349,-7.552458,6064.341309,FALSE,-28.905956434113,17.7491287012012,"25"
38188.269531,85.869713,198.622543,1937.800659,1672.835938,-265.859344,58.569111,676.107971,FALSE,-11.4947121944656,-44.1590210294953,"1"
9915.634766,81.894974,99.142029,990.531616,1253.127441,100.375282,10.517427,-265.94632,FALSE,-0.917280451113928,-48.8086275196386,"2"
527.470093,116.007645,258.310883,2956.003418,2275.931152,71.588959,109.413559,1250.424683,FALSE,29.1754869424911,1.62982333530349,"14"
3211.906006,57.75272,167.930756,79.974495,897.025818,938.972534,6.634099,6770.449707,FALSE,-17.8253005891014,-12.2637919361444,"8"
5035.911621,90.431511,234.609619,183.970917,1372.173706,883.484558,44.992435,4247.864258,FALSE,-17.1662755228683,-20.8998747762081,"38"
309.513641,59.053246,202.814575,1845.813354,49.184067,79.786873,90.89814,13418.421875,FALSE,-40.648405239546,-9.11193130537049,"25"
74.122849,141.279739,198.395813,452.075714,835.928711,133.82016,109.489296,-50.928539,FALSE,11.5882406053655,11.6269925629795,"29"
14195.962891,144.770065,167.147568,3017.026123,1800.383911,-60.656384,72.062302,-20.988874,FALSE,-4.30910723895306,-46.4526394180425,"2"
592.075012,111.415802,169.372635,649.27948,809.96875,209.426971,89.482239,957.401489,FALSE,10.9765986131869,10.8468762889114,"29"
658.11322,175.300888,173.326736,409.503967,1526.786255,738.074158,74.183258,4139.197266,FALSE,-10.9129958461224,-10.662115147708,"8"
1585.378662,214.853302,237.879593,127.143013,157.66214,183.459503,50.647194,4771.81543,FALSE,-23.7462864455729,19.465932377337,"10"
12820.123047,175.526993,157.563828,2681.392334,1148.873657,-115.238426,4.87644,863.581604,FALSE,-4.98480321883776,-47.9740914346645,"2"
68.228264,202.645447,269.027863,372.597992,228.799332,197.59317,35.123135,376.121521,FALSE,15.9375872277073,26.7047961362561,"28"
1663.505859,149.663742,208.586731,90.87159,101.165123,159.28952,24.292604,8641.62793,FALSE,-34.1437063849456,8.7660979445326,"25"
296.821808,62.765053,261.081024,158.079987,899.226257,64.283501,41.951694,2095.045166,FALSE,1.39208980982769,9.9202306307034,"29"
281.376221,108.318932,262.118866,174.070236,244.501312,148.067474,18.272076,5397.34668,FALSE,-31.8822186808387,25.4998432277798,"10"
185.415405,87.04425,149.413254,449.999847,905.155457,83.881187,0.479238,471.497528,FALSE,14.1567225874368,11.2740221472012,"29"
-8.156701,76.924316,115.271729,717.62439,1113.076904,158.192505,-40.276821,772.987427,FALSE,10.8847406915435,6.78824203700739,"29"
2203.447998,110.49221,210.472137,204.678604,262.142853,95.268547,20.085657,10048.397461,FALSE,-38.3987156726366,0.355234278768608,"27"
1219.9021,102.020042,222.956467,3162.0979,1367.766113,136.581726,-31.114733,-59.511341,FALSE,38.0324117828823,3.93378667858469,"11"
12793.770508,9.200592,268.441254,2833.818115,1190.544922,-108.078743,25.670712,3.468576,FALSE,-4.86481470002482,-48.4189128493857,"2"
390.731476,26.327728,202.771271,280.135315,501.007507,219.390808,-4.015065,747.00116,FALSE,12.0961092610542,19.0583344139444,"20"
3090.946045,55.83585,329.240631,145.531097,-63.573303,-0.826651,46.622383,16421.066406,FALSE,-50.1533491132099,-4.69819435102421,"23"
1804.952515,177.108948,233.036407,523.129333,1429.325073,281.098724,219.539749,3267.891846,FALSE,-6.65527373282645,-0.789495958776011,"24"
102.318237,134.458328,247.252762,396.771576,1721.247559,439.116455,41.720428,7501.038086,FALSE,-17.4494832558573,-13.6568496603585,"8"
706.023315,104.553627,288.291565,95.603706,83.423309,85.700142,79.042564,2212.080811,FALSE,-17.5943671956059,37.6623142562676,"28"
-191.992569,63.805004,271.318604,223.489532,330.448425,132.661331,1.23532,2315.457031,FALSE,-9.36756148914755,27.2356988995744,"28"
3628.740723,114.369705,260.314697,84.130295,200.643188,62.198261,85.698349,10490.772461,FALSE,-42.9776095048268,-13.2806489331006,"27"
19.207846,94.346458,185.782974,96.253723,1187.418457,1534.640991,13.122401,3749.95874,FALSE,-20.4255704364426,-36.5696387688034,"18"
-203.153397,170.236786,106.585739,1296.869873,584.319031,443.197235,-33.411472,4402.418457,FALSE,-13.1266684169296,0.676077698168442,"8"
15.430108,95.108162,268.512604,452.527069,1419.137817,541.877625,89.258804,4588.258789,FALSE,-11.9487506145284,-6.43863508528332,"8"
367.411469,99.885277,162.3983,199.186249,760.299683,861.939819,-19.341202,2.20594,FALSE,-8.90121923229946,1.68749626751215,"31"
27169.355469,-21.184372,104.080406,1536.406372,947.479919,-145.896179,2.918809,963.867249,FALSE,-7.67575476230316,-46.9648846591002,"1"
274.247009,81.054726,241.294876,310.842072,1167.080566,103.150307,57.1049,1340.148804,FALSE,7.41885352875128,5.768136371717,"29"
243.37912,142.793686,224.181076,699.207153,1279.22583,148.270355,404.914368,1623.513306,FALSE,0.457747427307414,1.05587484989244,"24"
313.887421,122.902596,136.151199,790.102112,773.46582,32.285599,110.423981,93.197128,FALSE,16.8474614987765,12.1899024726133,"29"
772.231628,153.68956,193.167175,130.9729,204.532806,73.407196,52.072292,3440.537842,FALSE,-24.9947266701034,30.2600779649897,"10"
235.197906,116.032455,47.117828,261.285309,375.275879,1056.320557,-10.019881,137.736069,FALSE,-13.2836236169214,-6.70849369508398,"31"
108.623245,124.381134,279.186005,77.619972,52.629162,935.576538,30.33201,-18.727974,TRUE,-6.3987138689125,8.19584953816739,"31"
618.203552,56.748951,163.909729,442.819336,880.443787,82.729881,11.309996,222.216293,FALSE,15.9855353989452,10.83310771828,"29"
321.75116,-84.033684,143.350067,97.396088,802.054688,816.1474,76.945129,-6.399395,FALSE,-8.34112503695738,3.19426574435147,"31"
653.601929,136.691162,178.522949,122.862495,565.003052,755.31189,165.602844,314.164215,FALSE,-9.59249054626341,6.46775623071389,"31"
58.418224,19.382648,185.011475,99.796379,300.03418,112.026649,-20.831879,2169.063232,FALSE,-10.6070296822885,28.8722165634916,"28"
30.941431,153.513474,245.125885,663.165588,520.580994,154.708542,-10.607987,121.140167,FALSE,20.0060035662625,17.2631109582995,"29"
1165.740723,118.885765,185.495285,138.448547,-47.764755,248.546555,17.32128,497.818787,FALSE,3.84921871077558,29.2019066696589,"16"
16652.898438,75.248749,281.698486,122.222298,377.803925,-65.413925,-1.510312,19137.542969,FALSE,-36.3485136378584,-37.7455973548878,"5"
28720.671875,82.836838,146.790207,1116.862305,1554.71936,-161.844421,-29.160421,408.372101,FALSE,-7.97185668879372,-44.6210453892654,"1"
330.444611,21.781065,193.703125,472.642426,1227.064209,39.238308,76.956848,1711.636963,FALSE,5.11536169596743,3.46878210211324,"29"
91.991676,127.230141,286.852753,268.371338,401.416351,150.244217,68.824692,2601.834717,FALSE,-14.7239063377641,26.4084833135012,"10"
599.399719,53.376598,196.932877,214.590408,138.687073,321.011536,20.612404,3739.000488,FALSE,-19.2907607980249,20.408038663422,"10"
219.081757,127.66526,143.903137,322.789642,177.028625,23.809805,-2.609569,1045.350342,FALSE,13.3661940943283,26.4224601520042,"28"
5784.767578,101.360603,249.563171,652.203613,762.234802,196.322815,77.558525,3881.758789,FALSE,-26.7568195320254,-26.3354409152212,"38"
4306.899902,123.844231,227.771606,234.311996,-65.862022,92.819992,15.414794,7141.756348,FALSE,-36.3613677518225,-18.4065654509742,"27"
9746.608398,142.484604,149.609619,2237.519531,1691.32251,-119.482979,20.89535,138.384216,FALSE,2.22343890956633,-48.6416350652954,"2"
19668.626953,101.288109,158.886337,3460.294434,2538.727051,90.62043,10.384019,825.191711,FALSE,-4.42986221247796,-44.4786231896122,"1"
1032.24707,88.692787,238.016754,25.313795,-72.074478,283.231689,-4.842061,4786.744141,FALSE,-22.396608558506,16.8187396348376,"10"
10121.77832,178.883774,229.289734,3319.094971,1549.886108,-44.104641,19.726778,146.928787,FALSE,2.59072989237753,-47.2071644141635,"2"
28140.896484,119.028992,129.276733,1038.23938,1305.471069,-191.820923,34.631351,85.911316,FALSE,-8.37680620774587,-44.7484938008095,"1"
276.429535,106.433334,204.734879,125.12429,148.556412,389.403656,97.062325,979.399719,TRUE,-1.34206148030019,19.8573446653548,"20"
22601.207031,168.316422,69.471519,3404.500732,2364.709961,-157.667603,-5.664822,216.261124,TRUE,-8.6909078222426,-43.5407308769417,"1"
4416.460449,55.671764,169.397842,88.079483,31.372961,35.743267,55.913685,10680.009766,FALSE,-43.3513267353458,-16.0418251705384,"27"
132.536652,120.430092,273.095215,179.265793,239.318192,605.606628,63.613632,309.455505,FALSE,-2.93409004636791,12.6366444060754,"20"
97.741425,110.770615,250.949371,25.973892,263.204102,285.916229,65.373138,28.908945,FALSE,9.17185607397608,24.036784478466,"20"
8473.244141,217.665741,232.917465,217.345047,-12.623541,97.013,12.641416,8203.40332,FALSE,-37.5136308892716,-30.581377672071,"5"
3512.363281,30.894285,226.96965,155.7108,84.416649,0.495834,16.529198,3199.358643,FALSE,-23.6556707820344,-3.44388558992488,"36"
488.103546,65.688881,76.690842,148.374924,592.404236,324.19632,79.551949,-93.164597,FALSE,8.60995177455843,16.4251833951428,"20"
5532.237305,117.05896,227.016586,164.19165,51.986897,443.056244,-46.210819,6470.199219,FALSE,-38.7266190566657,-23.7333027155972,"38"
510.437714,273.251099,260.816681,319.631927,171.976303,92.775215,289.958038,1041.657715,FALSE,-5.5561527808056,36.9701130957907,"19"
99.055717,99.051529,158.299774,226.703125,728.503235,68.590996,12.208741,1087.312256,FALSE,11.166242463791,13.8407461095544,"29"
9196.829102,123.887581,138.767914,3016.044189,1770.602661,142.036499,84.413559,316.170593,FALSE,2.93757760124363,-47.5097448347423,"2"
1575.8125,505.022217,238.037628,499.378418,-11.804859,55.688274,127.706894,526.237061,FALSE,-1.37132766422333,29.7999200421044,"19"
1875.34668,77.965508,187.797089,152.847885,-23.614595,114.148605,-21.532999,584.213928,FALSE,-2.78039887316883,27.6184353751852,"16"
102.902039,86.298218,208.694336,125.420074,285.262848,455.952026,-2.238494,4521.525879,FALSE,-17.2338753888668,8.11630501334339,"8"
405.611176,136.236069,209.171753,739.750671,2033.190796,93.721672,158.043533,497.186035,FALSE,6.63448849225404,-6.69763357560131,"29"
15656.733398,300.076691,226.961609,325.362701,218.514359,326.154816,57.508823,2055.89624,TRUE,-32.8365816667547,-35.7490283156294,"5"
99.227837,90.340752,103.491081,223.776779,511.505737,56.056988,23.623718,483.942078,FALSE,16.003654462098,18.8559993708441,"29"
2482.07373,-10.077489,179.693649,112.041252,-254.234604,381.400513,39.812572,-73.75531,FALSE,-9.86261081359498,17.8026117092781,"16"
4753.963867,72.818977,236.767487,76.295769,181.223892,66.598862,24.757988,6558.483887,FALSE,-37.0436347020288,-21.0147171241305,"27"
369.854523,98.800308,140.637344,81.272125,101.781052,-28.455381,51.788689,2018.109985,FALSE,-15.4511925243301,39.5506890204257,"28"
343.560486,116.427849,224.0466,924.169617,639.088684,90.882668,11.202277,12679.240234,FALSE,-35.1793777434105,-9.1966992946321,"4"
423.933289,242.236313,260.221649,50.490028,330.433472,111.026184,57.045647,604.871094,FALSE,4.28473478115295,37.5396167511343,"28"
3422.816895,257.431091,234.533966,98.830902,182.223511,152.195755,83.757957,177.28212,FALSE,-20.3954922869294,1.9011577388587,"16"
19261.683594,215.762939,248.712418,2528.179932,1896.521362,-64.648529,93.590256,414.565857,FALSE,-8.61489761957748,-46.0759467478784,"1"
528.521973,142.808578,331.753571,62.111881,34.019154,628.718506,18.108356,7629.570313,FALSE,-22.2696746667252,-5.09635124093177,"25"
242.078293,176.157578,213.112396,2359.312256,1143.096924,314.931793,29.03323,650.661011,FALSE,19.9727099300565,4.29112691383791,"29"
9.730429,139.447372,226.415924,427.21698,203.528671,431.519318,55.619644,12737.575195,FALSE,-36.2373879869408,-8.9370914885318,"25"
10156.955078,-5.820292,167.851959,2785.515137,1858.172241,64.31778,29.887005,-24.543224,FALSE,1.71001473383751,-47.18474907826,"2"
973.571716,186.054657,307.689972,262.726685,476.765442,63.331856,116.288322,7849.145508,FALSE,-34.163644196088,12.5840520189232,"25"
-61.136208,48.065075,225.875061,168.396545,1534.964355,1270.137817,77.502968,4571.737305,FALSE,-17.7522432854584,-30.6634944047028,"8"
260.35025,56.719086,169.637695,68.847984,111.681717,834.774963,16.430908,126.189629,FALSE,-6.96203778550915,4.94961706750959,"31"
274.259888,109.082932,186.266388,236.363586,-16.714468,552.384888,69.560913,3218.310547,FALSE,-12.3541793140835,10.4376710243787,"8"
4738.195801,176.125671,199.436203,173.739975,175.529251,481.999207,91.292122,813.684998,FALSE,-28.1164229529521,-17.7678714429834,"38"
9215.826172,117.560455,165.974091,2315.381348,1834.411377,54.97414,126.257904,485.571014,FALSE,2.41946076337533,-48.181442357456,"2"
185.395218,47.124111,156.636459,277.336914,712.933594,74.824722,96.168533,5473.752441,FALSE,-23.2339257424037,9.28363459755722,"25"
233.068344,194.077072,278.143463,530.839172,203.755875,145.113907,19.090712,92.919945,FALSE,19.0844248367674,23.8700776235238,"28"
1139.641479,152.478806,219.337357,131.657013,103.250282,174.996475,59.711918,7589.256836,FALSE,-33.4623003665849,15.1209967713591,"25"
-69.320732,74.570824,190.863159,395.24173,506.065552,81.947624,22.609819,5422.322266,FALSE,-24.3467855228399,12.5674985858783,"10"
85.896828,100.362534,219.350174,100.599319,1191.886353,938.158875,38.24725,-83.368111,FALSE,-9.38156449986467,-4.39450302566339,"31"
1510.558228,109.12516,266.242798,134.233231,75.894615,12.16056,68.389519,11875.766602,FALSE,-40.6529503944049,-1.14867573826309,"27"
4182.439453,129.735275,238.899948,213.982651,11.597564,553.679626,22.017015,10427.245117,FALSE,-39.605843179433,-13.2458297448113,"27"
179.732086,152.425903,204.503036,72.404007,155.972305,270.221802,82.897301,165.326233,FALSE,6.74635599490537,28.6952610444635,"20"
2053.33374,73.085892,276.62854,186.428299,106.372177,96.815773,151.441422,4438.612793,TRUE,-22.4066433778758,15.3996237865083,"36"
5280.766602,120.539597,125.098145,968.203003,1184.800049,27.126219,34.842033,178.246399,FALSE,33.5510698514353,-29.8992997209926,"2"
455.971008,81.09243,237.088074,138.931427,169.763184,100.626816,130.58049,2120.257324,FALSE,-17.9566911445865,41.6986060089881,"28"
68.951263,157.230133,126.726837,128.76181,1731.286255,103.642609,13.103843,359.766632,FALSE,6.96330050698383,-2.13752509879471,"29"
385.16571,144.702194,176.690948,76.018967,54.684818,515.272888,114.265358,4232.296387,FALSE,-13.8884377534636,8.83235375048644,"26"
1291.638306,94.696877,150.815735,1320.508545,852.375244,133.762634,23.847811,242.241028,FALSE,21.9592237616003,5.23970878366052,"15"
-11.919878,115.039925,219.897018,243.732834,1549.811523,1454.601318,30.413187,5635.384277,TRUE,-20.2062428465728,-30.6100026195594,"8"
8844.328125,124.298759,189.147339,1299.46814,1880.94165,1.759528,3.762273,26.860409,FALSE,5.47331312284714,-48.2456617894929,"2"
9731.84082,126.638222,129.427612,1064.894287,1450.125488,69.201935,33.189732,-131.1138,FALSE,0.451073356596874,-48.6836624301404,"2"
1208.752808,222.447601,201.968399,141.936966,190.494339,249.341415,88.571983,11213.553711,FALSE,-37.1093459790916,-1.70031393477113,"27"
18400.068359,-21.254591,148.042145,1781.739868,1431.593262,-43.451054,-33.744198,-46.246082,FALSE,-8.635485377314,-46.268335068731,"1"
182.994049,-23.710226,102.077927,53.248402,1871.665771,1126.601563,39.758095,5676.999512,FALSE,-18.8787815061397,-28.1083394941004,"8"
11329.878906,94.910469,166.834351,317.561188,135.362335,-79.656479,-6.367241,1706.421997,FALSE,-30.1726582243544,-35.3633296582298,"5"
10763.051758,127.272652,187.147202,883.00531,1784.391235,-5.897712,69.998978,55.769371,FALSE,-0.660651912668045,-47.8846067092935,"2"
6763.269043,104.162277,170.409912,3095.584961,2376.033447,92.675568,52.552521,-106.374794,TRUE,34.3135704130071,-37.3998038951515,"2"
70.497986,64.865379,169.823685,170.885742,134.488525,303.317261,52.165585,272.221771,TRUE,2.70184211346916,19.9217525368169,"20"
55.182968,137.256561,164.288528,395.928558,1709.796021,194.507446,53.216923,1235.481567,FALSE,5.1106970399349,-1.67877184167627,"29"
1131.351196,127.924622,138.243912,1283.592896,2014.09729,20.288254,-17.364538,647.847595,FALSE,12.6229256348663,-10.1975927972643,"15"
1625.102417,64.208801,176.541809,89.509621,183.779556,85.60598,28.569761,-50.480064,FALSE,0.520434133457603,31.6387924263676,"16"
13590.624023,198.626572,154.065079,3542.284912,2789.945801,44.446812,120.2621,-24.818722,TRUE,-2.4725910133416,-43.8434472617485,"2"
97.643181,0.797445,147.937927,146.860092,104.272095,701.580933,43.560894,803.746033,FALSE,-6.916042295607,8.23933737754163,"31"
369.970917,102.575417,226.995926,522.483154,598.187134,64.108261,21.848682,-251.817917,FALSE,21.317782816696,16.0957007166161,"29"
-38.24287,153.734024,247.879623,506.151947,891.295532,306.436646,43.467453,5240.155273,TRUE,-18.8371120586227,3.01703033575051,"8"
-234.438538,199.576431,318.126099,308.121857,256.658966,166.003525,-2.058155,3880.268555,FALSE,-21.9097221740743,22.1389397523267,"10"
412.084534,42.757,240.752167,27.389769,219.325104,110.650002,59.384548,2729.638428,FALSE,-20.8422031435817,34.8348880527721,"28"
1232.911255,131.5448,308.301544,73.329018,257.745453,34.095425,-4.493964,4788.002441,FALSE,-25.3158689256252,20.0543217818233,"10"
3649.562012,217.192139,171.349472,176.440582,284.591827,159.141846,132.840942,842.921814,FALSE,-20.9957118860023,0.219966192002308,"16"
6333.486816,226.046448,182.023102,1535.940063,1183.953003,-8.28697,-15.885846,-10.339722,FALSE,29.2957676166397,-36.1047252524012,"2"
2272.727783,95.225204,363.959564,79.495262,68.055145,43.373505,93.125046,8961.6875,FALSE,-37.7244913161027,0.891015891226341,"27"
815.739563,125.040833,177.685928,225.303955,846.803223,287.564178,72.128326,410.135864,FALSE,9.422611470375,13.1111211510475,"29"
556.738464,146.396454,166.343277,271.011047,662.42865,172.568359,43.860252,1020.425415,FALSE,10.5306988681859,15.5439794216466,"29"
287.855194,279.680817,241.540436,518.101624,880.310669,43.230099,59.045647,102.563828,FALSE,15.8353623939607,11.9140667883962,"29"
-34.806519,99.302696,213.561279,78.863472,506.948975,727.9245,0.712953,6208.708496,FALSE,-19.6900792850787,-7.5012259653469,"26"
2247.829346,178.481857,213.634705,95.494576,94.437317,71.859879,90.730858,5851.161133,FALSE,-28.3756128858519,13.1730038161271,"36"
120.97142,155.989731,188.764908,262.740784,492.132172,201.279053,53.165184,10924.478516,FALSE,-33.3153668747424,-5.84177188815955,"25"
10430.921875,180.302109,174.661972,2723.270996,1621.436157,117.060188,6.035416,545.377075,FALSE,-0.0692051448234369,-46.3525041951136,"2"
77.672279,87.443932,54.372005,118.456146,154.688843,342.73349,29.020853,640.058655,FALSE,4.32414253352124,20.2872939187871,"20"
16015.268555,245.033295,171.19278,3249.584961,3195.041504,63.799641,-53.121174,-213.458664,FALSE,-0.073693072371055,-41.1542437284459,"2"
1101.777954,281.935791,202.665573,275.442963,347.601746,680.817871,163.18959,1050.022827,FALSE,-9.67930696821447,10.8009107462505,"20"
430.012665,125.057114,220.148453,141.04895,153.870911,91.768326,39.269798,4185.981445,FALSE,-28.3895036162038,29.021485269638,"10"
95.200623,110.077583,246.06842,2088.84082,1230.058594,126.307091,25.25532,-21.773876,FALSE,21.7436204065966,5.0411338971112,"29"
21.592636,16.11577,243.480621,212.728638,980.220032,71.00029,31.815098,112.032288,FALSE,12.6443738060498,10.900624957495,"29"
965.972107,144.080902,197.937286,399.781494,1416.939331,627.644836,47.718342,4716.87793,FALSE,-13.7681334944022,-8.84355668664857,"8"
1444.241821,173.636749,263.133179,1227.777832,1266.156982,90.885864,-28.71557,178.240356,FALSE,23.6638955685333,1.47769988012519,"15"
118.36145,115.391533,126.336479,280.933228,527.44989,349.077637,-4.508923,1118.646851,FALSE,2.88913868321697,14.3424174835852,"20"
710.615112,30.400265,151.209335,952.643982,274.433929,104.604904,62.985085,1742.911133,FALSE,8.68939687298592,16.8860483742703,"29"
114.34716,157.390778,241.468277,238.848724,34.928707,113.000298,-1.376224,200.740891,FALSE,17.9125372265055,31.6548372874223,"28"
23.652412,101.499809,156.959427,660.349609,1400.345947,-61.35751,50.656479,149.151321,FALSE,12.032912134253,2.5043214930057,"29"
10205.452148,88.601845,221.92276,2110.167969,1572.693237,49.868065,-13.316193,-193.029968,FALSE,0.658401569339495,-47.4888617454706,"2"
1719.129028,37.498436,215.557266,123.79039,47.337547,28.479324,25.675266,20802.964844,FALSE,-50.6115721462054,3.52280276643272,"23"
51.304958,135.547729,220.871887,844.784424,106.385269,182.979111,60.239357,3440.555664,FALSE,-17.9826013511424,25.9806440516973,"10"
13378.02832,279.324554,318.927856,294.19104,69.500893,21.868567,216.175186,231.363861,FALSE,-30.9216513599506,-36.3494406593037,"5"
36.050854,149.880753,319.567566,404.093567,829.326172,147.842773,136.224197,13064.758789,FALSE,-37.2567011852667,-5.08091885238163,"4"
11275.082031,246.947815,271.982086,4538.380371,1680.336792,-71.295609,-9.731911,129.728317,FALSE,0.507137690774749,-46.5776049755531,"2"
19265.904297,143.160583,221.431259,3938.826904,1692.299683,-129.129135,5.797638,-435.178497,FALSE,-9.04353484410253,-45.5322802900739,"1"
316.776001,143.988266,218.361115,91.224937,59.657791,1539.783569,17.771799,2816.716064,FALSE,-19.4993353549638,-34.8892797125302,"31"
171.782425,60.040283,206.812927,163.972107,368.607513,243.472702,41.643326,251.322052,FALSE,12.0732210043632,23.2290657665591,"20"
29096.845703,91.501404,173.665375,3074.799316,1636.44873,-184.998032,51.21608,183.961487,FALSE,-13.1775152010994,-46.0285091448782,"1"
84.162193,137.660797,109.133102,298.448578,127.969513,44.312004,62.901768,350.192017,FALSE,14.1560605973833,35.0984259174278,"28"
-80.03334,224.408813,187.119141,249.918335,1043.038452,1683.727905,51.381573,6744.386719,FALSE,-22.1144625066131,-36.0038317848946,"18"
1251.918335,151.036057,169.169678,70.175995,341.111267,19.79764,22.220339,905.142822,FALSE,3.49885480454246,31.7091817443744,"16"
644.276733,106.800079,149.534515,420.601654,955.879883,983.117188,51.173824,3352.25708,FALSE,-15.549307428201,-13.6057092545654,"8"
45.385586,117.415581,344.256775,212.712082,381.844025,531.355835,13.423972,2997.498291,FALSE,-12.574920757829,8.97954038984155,"8"
150.249084,-36.19183,287.322113,343.76593,685.897034,685.69812,192.01062,4134.009277,FALSE,-14.1610147815429,0.353186184186507,"8"
-132.182159,37.230408,192.859558,159.62291,1978.905396,1563.198975,12.503798,1533.932007,FALSE,-19.258745996537,-37.3773534937859,"18"
5807.481445,19.322409,116.074852,898.890503,1991.442627,110.981079,39.020561,91.835754,FALSE,23.8422104754345,-39.6029915013105,"2"
237.441971,24.627598,264.945221,234.670013,610.642151,144.702072,68.255501,2885.8479,FALSE,-12.5508546274874,18.0042351558048,"10"
3965.616943,100.638451,268.127319,46.629131,164.635056,1.388428,17.088795,14546.027344,FALSE,-49.1526867725262,-10.2267376519114,"23"
11563.943359,85.996178,312.315186,3310.284424,2058.999756,43.909584,8.86621,-400.966461,FALSE,1.68065887109719,-45.8557547905327,"2"
8837.491211,143.754074,620.179443,153.443329,102.675812,694.305786,-6.63645,15975.677734,FALSE,-47.7403554722276,-24.0216022861946,"23"
122.137917,146.046082,206.767227,-3.635523,264.817383,139.9086,59.937393,7150.10791,FALSE,-35.6282534789097,22.0865745044867,"25"
394.376953,122.394363,208.560867,41.870152,435.388641,1023.648071,-25.920364,-65.961357,FALSE,-11.3492973843477,-3.11645963771908,"31"
1761.811279,66.627075,232.385818,184.207153,717.184204,1209.847778,27.492228,10169.673828,FALSE,-21.4538809765856,-22.6307333417807,"21"
2819.838135,161.418304,291.055206,117.344223,227.066238,253.687943,66.096092,921.452271,FALSE,-17.0819758155295,16.9284536293239,"16"
29510.869141,122.992226,239.569397,3712.625977,1946.706055,-79.91008,13.136888,731.242493,FALSE,-13.0903162091118,-45.5993021,"1"
9328.34668,220.810715,198.280258,3756.607178,1716.714233,6.011371,0.153629,-270.353943,FALSE,5.964193139399,-46.2226081488254,"2"
415.019775,213.372757,248.31485,105.218842,114.019211,-2.863316,0.133617,1509.614746,FALSE,-5.52341426862598,35.6940881842315,"28"
860.958923,163.20871,209.711105,144.065323,137.745544,97.298195,122.765923,6281.993652,FALSE,-34.3885795883685,25.3882393749569,"10"
585.221313,90.991814,205.718231,207.431854,398.859955,134.544418,112.25811,223.184753,FALSE,5.45653434600562,35.1832283841422,"19"
9385.821289,74.29541,103.684563,1456.279785,1387.085693,-0.965892,15.087805,160.641266,FALSE,0.826876438619981,-49.0762550852338,"2"
971.3396,83.27169,183.875244,223.912247,715.301025,386.345947,25.833632,5103.784668,FALSE,-20.0685834528472,6.53930372531941,"8"
7985.375488,103.572098,290.130981,76.720406,99.096825,164.330978,2.652409,16622.863281,FALSE,-48.6173714062199,-22.1116929859846,"5"
9810.839844,131.050964,135.631973,5372.544434,2634.829834,42.71413,-45.516201,784.503723,FALSE,4.13537864554333,-44.0754010721288,"2"
966.175964,78.059608,161.013107,340.756195,1187.034424,1596.565918,24.723906,6430.490723,FALSE,-20.6035805034448,-32.2666622020018,"18"
324.373322,131.892334,183.204361,1095.009521,1010.855408,137.525803,36.644417,698.569275,FALSE,16.1933914402274,8.59255113736627,"29"
456.605835,97.369812,276.044556,89.612259,475.369446,130.432114,-11.830694,5141.003418,FALSE,-24.4007774532386,15.6834979617371,"10"
75.506882,-57.211052,230.51355,732.495789,2396.827637,682.360962,14.103048,7662.880859,FALSE,-17.410549712383,-20.7984180906111,"8"
2393.946045,128.72821,247.801163,59.279369,285.171631,104.145157,96.935844,9909.81543,FALSE,-39.415613960123,-2.37924707455123,"27"
382.912537,179.059799,109.774017,205.55632,943.339355,291.655029,58.083,-134.042526,FALSE,8.82251705268889,10.8425712756091,"29"
3824.874512,161.736206,200.79567,369.336121,257.738098,409.10965,98.055786,428.020752,FALSE,-16.8490492054379,-1.88473816987839,"38"
377.54657,141.141586,155.926422,576.708679,1003.096741,206.41748,-8.567429,-117.374123,FALSE,13.8856876957067,9.45760749008496,"29"
239.496292,-24.867764,215.212021,1766.923828,284.697418,121.594551,49.686165,9913.601563,FALSE,-32.236063396289,-11.4242095476904,"25"
287.684235,167.849564,187.801559,249.66304,1336.888306,96.92614,77.64415,752.454285,TRUE,7.75863659856686,10.6856661070096,"29"
125.830032,101.567497,182.283249,63.757423,891.754944,75.556953,167.580109,3018.005371,FALSE,-8.59680952189333,9.29056164942823,"29"
424.918182,185.239807,337.557007,198.400604,965.981934,187.969376,41.251972,2561.825195,FALSE,-3.80498701845488,7.62510907390783,"29"
1981.318237,206.596542,261.042267,534.001648,1169.969971,185.970016,-40.248615,1052.691162,FALSE,11.5403470912303,0.206317642667553,"15"
213.019165,123.494415,116.603142,208.541733,597.039612,245.452255,-6.776084,722.029602,FALSE,10.1448419333078,15.9613789471323,"20"
911.146301,88.972137,162.430862,397.113556,402.063538,-5.809433,67.34832,123.25267,FALSE,15.7787491783265,22.9548004232667,"29"
223.363708,206.964462,133.246841,185.152634,1.183277,252.037933,41.451256,896.115479,FALSE,3.04643669922726,30.6371761957777,"28"
2180.159424,62.872227,119.100761,64.463257,1131.634766,276.960785,-28.34234,6340.438477,FALSE,-22.9704681523335,0.412478132362102,"25"
321.394135,168.23114,297.361237,302.794861,343.22287,73.345322,20.44908,1134.2854,FALSE,8.80552268496388,25.4194110242523,"28"
231.909744,80.865372,219.189163,172.94072,1166.092773,627.652954,52.552406,4833.541504,FALSE,-14.7414738365323,-6.07467292033511,"8"
752.723938,44.832092,233.413589,135.867996,-87.106812,610.217163,-40.457016,4999.98584,FALSE,-18.8566850434771,4.86578561601156,"26"
6575.162109,112.402321,182.293762,2293.987793,1963.539307,23.203705,-7.599327,967.418945,FALSE,22.5598666097579,-39.6589610943955,"2"
1075.780029,95.686935,135.322739,83.17897,357.907135,178.702805,63.875233,1093.444092,FALSE,-0.456667089315487,33.1979539203081,"16"
423.407227,74.272362,281.598419,124.338623,74.026619,121.783173,15.268262,13488.342773,FALSE,-40.9453628988707,-2.5857080133982,"4"
147.282227,122.695793,205.761795,258.84549,913.217957,147.246292,7.322812,555.765564,FALSE,11.9042637663543,11.2079745736491,"29"
191.937622,104.917732,144.605484,134.346069,1083.193237,428.533997,56.608429,3066.820313,FALSE,-9.55243614552809,2.78174218117786,"8"
238.563889,199.735489,226.04628,709.285156,685.181519,223.382355,67.083694,3576.490967,FALSE,-10.9726387786525,7.14831648849535,"29"
14934.553711,100.477531,104.409302,462.410583,929.750061,326.98056,28.460508,1256.112915,FALSE,-6.33963415790927,-44.0313943969822,"5"
505.6633,147.931396,154.413437,420.599609,1041.179688,640.962646,-16.947857,-413.388153,FALSE,-2.1344246988071,4.84169046996781,"20"
55.739574,21.473692,326.280701,1318.059937,607.048706,142.447433,25.036011,2476.148682,FALSE,6.93936814355955,6.72389004670307,"29"
462.060608,58.756107,255.276978,87.923157,340.435791,192.142929,34.205853,1182.26416,FALSE,-1.79880564995292,33.2645939034992,"28"
8938.681641,170.838577,167.53418,4550.100586,2024.735718,-67.636864,36.621708,2.52056,FALSE,9.53149031756955,-44.6887500523664,"2"
456.390717,80.437431,244.147949,327.041718,-2.014794,95.117004,27.945444,-8.819706,FALSE,14.1785004925855,31.5077791273779,"28"
7917.510254,20.884739,139.769318,583.651611,1406.000854,53.418106,-12.229865,3330.02832,FALSE,-7.80956327716585,-39.7309595483483,"13"
1428.691162,69.631012,275.627167,47.394676,250.275848,109.267349,41.180405,5604.910156,FALSE,-27.3240076654062,18.5485993592827,"25"
6350.70752,75.403671,201.826065,60.671978,142.087067,158.523697,30.150421,7307.985352,FALSE,-41.8307262108565,-25.4181244083108,"38"
315.751434,65.596397,179.554459,241.741135,177.069321,276.910736,16.768248,-97.061157,FALSE,12.2775144051627,25.8252379208671,"20"
285.443115,22.833755,177.350983,307.1492,902.600891,153.31044,38.09621,3588.39209,FALSE,-11.6337059445395,6.52469241730948,"29"
12432.94043,267.106873,320.803986,1852.11499,2235.131592,46.822697,67.440041,-38.348591,FALSE,-0.0792757194385426,-45.2096213363006,"2"
335.666595,246.952667,171.053604,577.454895,727.921814,303.736603,81.337845,-137.891037,FALSE,11.0766220668108,13.8933581327324,"29"
-17.943714,95.95874,44.627068,57.296955,234.13858,119.577713,-20.109592,1023.040955,FALSE,7.67851127539463,29.5875124907581,"28"
142.130554,127.183388,162.141861,82.845428,30.776463,485.640778,40.632015,922.246338,FALSE,-2.28687702268767,16.5675238979521,"20"
1156.488525,115.719223,323.644196,14.790349,24.486639,92.569214,-17.303728,6929.49707,FALSE,-31.4204088964792,16.5960331869393,"25"
2345.00708,135.507568,207.091324,113.856644,388.390045,122.508888,42.654251,5276.466309,FALSE,-26.6615572592908,15.4242549325399,"36"
67.77298,25.530893,177.911545,97.354103,465.951355,508.336914,-5.388069,5912.474609,FALSE,-20.8803333385875,0.50614345824376,"8"
3259.804688,50.077621,247.464218,1252.761475,1625.317139,7.450884,27.772293,-204.10849,FALSE,28.8359230227219,-23.0910841068573,"12"
-53.290535,133.05748,157.271744,257.877899,140.581665,368.169098,-41.798767,3522.38501,FALSE,-15.1497275433527,14.8476389256766,"10"
-85.934952,58.672218,77.340652,533.281067,2185.383301,116.865318,54.762428,630.835205,FALSE,6.36459310241602,-6.44962766405136,"29"
-199.856598,114.089592,184.157471,13.310944,1548.226929,180.166672,48.361568,1470.401489,FALSE,3.64187885646896,0.426074101887639,"29"
505.246704,156.911835,153.566345,-17.486526,66.192337,561.581665,29.943497,1994.359009,FALSE,-9.88031941325072,12.9110916508897,"20"
359.762329,115.513557,269.957031,396.706757,2834.643555,367.418823,-57.705502,1180.295044,FALSE,-1.58793486274086,-16.2025604337978,"7"
-129.760132,155.984344,223.226868,472.991821,526.154846,142.02182,49.624344,-123.116493,FALSE,17.693322829316,18.11153668646,"29"
21.58638,140.384445,194.468933,214.472046,536.794983,164.974625,63.014355,3766.952393,FALSE,-16.9125656234413,14.3012792796284,"10"
13412.767578,0.574441,190.734482,580.753601,1486.689453,26.189476,7.994941,-124.162949,FALSE,-4.84231963815685,-46.7140657983868,"2"
194.53894,29.866468,163.520081,-50.443161,132.362747,119.76339,19.875906,789.358154,FALSE,5.25548236254952,36.758645649714,"28"
3789.002441,181.664963,259.162842,-52.9865,35.771618,114.052849,42.217255,5449.204102,FALSE,-34.101961213151,-11.60142610653,"36"
-47.573605,194.244781,214.843719,155.116928,194.424194,169.870621,105.066467,249.958557,FALSE,5.77907849999591,39.8628316427154,"28"
11274.789063,120.389877,233.138474,4040.620117,2531.944092,33.458412,64.911476,-209.481064,FALSE,1.92572491815863,-45.7415904036326,"2"
290.508575,169.23732,281.593842,-94.986786,269.167389,734.456238,150.955185,2638.230225,FALSE,-11.2663088474409,4.74498210253891,"20"
-189.198792,256.757446,177.451569,648.880066,1470.309082,200.320175,17.09675,130.320526,FALSE,8.12941520015674,1.26788650131907,"29"
5155.364746,88.294037,96.968658,3206.848145,1512.347168,30.453741,-56.392349,-44.955769,FALSE,43.9079623151755,-26.4578944630525,"12"
533.126343,132.728928,204.767715,48.777626,103.916176,471.850189,120.082436,3692.006592,FALSE,-12.8507588666903,11.3177891797011,"10"
231.989777,172.619308,288.913544,434.918579,1462.741455,1254.661865,15.380744,13861.40918,FALSE,-27.0126766585208,-23.4274315359713,"21"
-446.693024,158.194183,130.704025,914.386963,180.140503,187.352295,53.221336,5.668039,FALSE,18.358077596852,19.8614431604256,"29"
215.997803,152.654449,209.027649,2.203241,773.325745,888.38269,129.547165,-224.100555,FALSE,-8.9430726348914,2.60709425568198,"31"
5226.845703,194.48877,279.595062,2106.807373,2047.141357,35.373829,-33.112339,-325.417664,TRUE,39.5940316297091,-30.1464988120613,"12"
378.617035,256.810394,283.497253,450.373566,652.68103,273.718964,77.124168,1911.88269,FALSE,-1.17468731396518,12.7068248665614,"28"
235.671432,213.567184,225.939957,1086.905396,656.151672,110.171165,136.182678,51.676769,FALSE,18.5264608730302,13.3784809451896,"29"
-256.63681,40.001923,170.807831,90.252403,385.156464,643.182861,36.273464,201.09523,FALSE,-3.22137351116382,10.1233111129016,"20"
6363.26416,89.732582,175.266418,959.576965,1398.679077,8.023016,37.490181,-71.109276,FALSE,25.1860777370677,-38.2229250277724,"2"
65.282539,106.744934,123.510391,458.216736,162.352966,214.719574,5.792362,-179.64209,FALSE,17.449720585842,24.1267644531877,"20"
-179.904709,109.267754,236.173492,491.958313,981.49939,152.716293,53.891598,-351.463623,FALSE,12.5898226915882,9.7070547100755,"29"
19.919291,143.20578,143.921295,151.581802,183.452728,45.1978,89.92012,-204.375458,FALSE,11.2408444707663,39.7439213646039,"28"
-153.452805,6.705197,119.433304,57.828354,985.082092,1279.509888,47.457195,4001.52832,FALSE,-19.2620413229209,-29.836411676814,"8"
-5.720916,177.625336,209.319489,159.648697,379.831207,546.221802,36.422047,-7.666618,FALSE,-0.991494494075504,14.4277362415788,"20"
2314.324463,168.910172,187.585556,294.095306,1063.546753,133.61911,172.24028,943.582214,FALSE,10.1159644177669,2.80607781573051,"12"
2751.150391,170.176422,356.036865,512.565552,1456.221436,88.531273,94.819191,1803.425049,FALSE,11.7164847730039,-11.6718702499489,"12"
2204.684814,163.981796,332.341156,235.664307,72.092155,90.490402,46.758419,3586.528809,FALSE,-21.2774921231157,19.0076220708289,"36"
1845.328125,179.859161,249.923233,112.106979,293.488007,34.416916,11.546771,6250.786621,FALSE,-30.1100271693786,17.8938336887901,"25"
-67.588463,113.771706,165.955353,147.991089,564.531799,883.367065,50.374748,-84.681091,FALSE,-8.6378740541713,2.16538967710961,"31"
5299.282715,49.481213,367.88739,83.429642,287.937836,87.692215,109.409645,22160.980469,FALSE,-53.9415538496752,-0.371305776470913,"23"
633.467346,82.752518,191.930557,268.611389,96.053497,204.263885,45.230911,-138.431427,FALSE,10.7469055629765,31.6404387622354,"20"
128.754303,91.046272,289.434937,941.178894,108.349243,81.202919,55.218834,7180.392578,FALSE,-33.2086667452698,13.0393885808401,"25"
11223.273438,126.297813,336.13382,4076.34375,1932.257935,-2.670207,-88.420654,-103.986694,FALSE,1.93890565432492,-45.5488992092807,"2"
726.899841,271.69046,176.339523,495.567169,-22.753515,389.227264,181.79364,1991.844604,FALSE,-6.89488235934047,20.9506703907363,"20"
351.470459,298.639862,249.689728,1166.418945,1165.211182,350.346069,178.089615,187.951981,FALSE,7.07642060241091,5.74416051900684,"29"
11986.27832,309.384003,217.607437,1448.457397,1661.848022,-64.707603,29.222656,558.658569,FALSE,-2.07755081108594,-46.8999736657626,"2"
13568.533203,181.50856,213.816193,4108.752441,1494.557129,-88.454041,-41.383602,-155.628555,FALSE,-2.63503747762246,-46.3951795362699,"2"
2258.123291,148.045456,165.639389,1004.209717,933.450256,219.348923,33.349003,5915.505371,FALSE,-23.3570118741634,0.518975313160544,"25"
4528.993164,122.30246,208.001907,567.850525,1257.308594,468.312958,52.078465,6812.128418,FALSE,-33.6748704723743,-21.2076144544252,"27"
-53.363033,164.693115,322.921692,306.489899,507.767426,224.671997,56.203579,12461.983398,FALSE,-36.3146283773163,-6.27598003285331,"4"
11553.591797,142.06514,127.814758,1562.872314,2003.907593,9.914421,25.682152,-126.53363,FALSE,0.118868617745482,-46.693547853919,"2"
150.052414,87.778053,216.998383,135.794022,62.457455,41.006927,-5.635083,5.499048,FALSE,18.2812285862629,31.5652007609618,"28"
18977.837891,163.82666,175.986862,1257.974731,1150.697876,-42.732773,152.911682,363.102814,FALSE,-7.15301492761452,-46.3298965726598,"1"
80.405159,289.010864,232.724258,290.054718,791.475342,43.395626,25.758888,1202.185913,TRUE,6.81358047573322,9.03600590131786,"29"
379.109222,133.359955,191.486816,63.419418,81.883301,128.02063,17.256861,281.735229,FALSE,12.7823947709231,34.3962342144796,"28"
-52.052952,72.444435,190.384827,145.066696,45.289272,161.680527,10.71053,8498.385742,FALSE,-37.6069857573892,15.3711807652876,"25"
481.484406,85.354301,236.917206,381.690033,498.086304,98.419052,77.58017,-312.690033,FALSE,18.1923851843052,20.988210221192,"29"
407.830139,197.356506,182.281845,84.124275,1100.838013,101.440933,60.858562,2617.360596,FALSE,-2.19746756949008,5.03535611226158,"29"
1897.742432,112.648415,298.69397,105.392693,97.573242,52.64024,160.232651,5692.8125,FALSE,-27.4704494887495,14.1583261622733,"25"
350.925018,13.293042,179.289734,189.135223,733.999451,83.090698,23.641033,241.604156,FALSE,14.493044322296,14.5619344639224,"29"
3128.258789,111.436295,176.043472,183.273895,-0.714613,432.30896,52.450748,292.094788,FALSE,-16.0264343123932,8.22632058323467,"16"
406.166382,154.569122,270.191315,195.584869,15.206559,511.775055,39.862423,408.66748,FALSE,-1.16161997707821,16.8108046823007,"20"
237.563675,196.65593,176.876282,238.421738,159.686295,31.95009,2.409972,1668.82251,FALSE,-6.12141617241697,32.8035949910486,"28"
149.742584,175.263702,207.534424,132.966202,198.60463,780.536316,66.290878,5538.187012,FALSE,-17.1010106385072,-5.32821529637582,"26"
1409.901245,138.579315,256.252014,126.014389,40.141972,36.660126,70.79454,1860.050415,FALSE,-7.78041400015682,29.0849917517435,"16"
243.352646,50.788338,187.787735,116.014557,1411.290894,1469.30542,14.40779,2844.963379,FALSE,-20.0556471694664,-35.776155576569,"18"
1350.320435,246.318527,284.459686,280.843842,1195.853394,330.00766,73.455109,7188.512207,FALSE,-22.5851227815515,-4.215776611881,"25"
9665.729492,156.216125,233.42305,2106.381104,1699.947144,-67.337334,35.491749,157.297623,FALSE,2.04565701464005,-48.2648275861852,"2"
2842.212891,99.701294,191.296036,153.621552,17.672903,73.067589,57.245853,12846.761719,FALSE,-46.0322149552018,-8.47404911935226,"27"
984.306396,190.265823,273.157349,212.38414,130.76355,402.703339,62.984825,886.909241,FALSE,0.449263677181733,20.4307418475818,"20"
337.587402,150.295578,207.004471,93.89576,24.923014,340.764435,105.12442,493.816986,FALSE,3.23473069034348,22.9219702058142,"20"
9323.487305,162.512131,259.856293,2455.582275,1918.716553,1.572416,44.819847,-166.948685,FALSE,4.59326714903065,-47.8958836791098,"2"
564.26239,89.892776,400.953369,76.811165,246.341125,133.740921,45.643829,13268.046875,FALSE,-40.7652568407702,-2.50351002887983,"4"
96.08857,191.435349,183.191116,1717.133911,734.995483,413.97937,91.327789,3979.514893,FALSE,-10.8654518257681,-0.289039238821181,"8"
467.022003,147.091873,146.144882,225.404327,690.288757,812.445618,-29.064585,1421.97644,FALSE,-10.4901584281387,1.64788103748534,"8"
3011.313232,127.265411,217.365356,147.331741,165.200989,22.630951,23.841263,10769.446289,FALSE,-42.9817846385615,-11.609120756083,"27"
3464.957031,105.962181,188.616989,120.471397,-12.853992,745.697693,-14.991263,422.438995,FALSE,-21.7521819002936,0.401227625382713,"31"
275.063416,110.937088,203.084763,426.118927,432.904205,83.643578,110.168945,1917.853516,FALSE,-8.77553012953881,30.1145321861703,"28"
113.583,70.294601,237.794632,140.027893,630.596924,128.34761,45.092201,656.421875,FALSE,12.5845194421151,17.228661829009,"29"
22800.628906,230.392059,160.528854,1461.653076,1343.421509,4.651048,14.32588,-407.757385,FALSE,-7.48031704170943,-44.3051470556423,"1"
10646.302734,64.563164,204.425461,2371.527588,1614.532227,27.318501,19.224842,215.419846,FALSE,-0.287565837529626,-47.4147719835179,"2"
100.230446,93.399185,182.649033,884.728699,1351.701294,94.29377,73.348381,612.145386,FALSE,10.068399393573,2.20490864805887,"29"
658.155701,225.456085,302.340668,174.706863,262.529755,516.653137,20.30352,4505.712402,FALSE,-16.6834645024674,8.27728033959439,"26"
290.737122,159.544754,315.651276,740.498962,498.628632,144.671005,115.285919,3353.497314,FALSE,-14.7135742624346,17.0405696944422,"29"
1108.346313,67.037384,269.110443,135.081207,160.137604,129.616287,24.700712,12868.216797,FALSE,-40.8160933561972,-3.436752329342,"4"
13.738759,104.669945,196.303375,189.527863,1267.452148,497.134735,-11.765021,2270.133789,FALSE,-4.14469344497285,1.14419037087758,"8"
1072.794434,179.130676,143.911484,84.164337,236.994797,291.151123,75.546913,1.749003,FALSE,1.72346852495697,30.1770411851042,"20"
487.06192,43.606915,228.254517,101.939911,248.642288,565.913391,117.501579,171.434006,FALSE,-4.37492652144428,13.6917771292187,"20"
2332.205078,263.506104,324.921936,24.803888,93.26252,146.330338,95.506599,6984.617188,FALSE,-32.6021506296909,9.15290610265565,"25"
602.307434,204.589676,234.713547,169.687302,911.066284,1672.655396,3.73851,10396.892578,FALSE,-23.5266199922217,-30.4215448853451,"21"
11545.50293,88.810997,189.452179,1551.503906,1517.905884,-36.802494,8.873329,-168.919235,FALSE,-2.05056326385839,-47.947689630886,"2"
2259.662109,171.839645,241.718369,220.981873,308.680634,155.892563,90.278191,9173.801758,FALSE,-36.9808543267845,4.81751908692489,"27"
312.824036,118.444298,202.268417,310.541412,787.984924,120.626198,-14.394739,1305.803955,FALSE,10.0505910564767,11.8604276079373,"29"
1417.785645,175.548111,191.902176,76.556213,167.311111,204.074265,41.422859,710.550842,FALSE,-1.14717219044656,31.7139362397427,"16"
230.189163,142.042404,299.498444,93.883141,181.957596,63.162529,111.533287,7292.522461,FALSE,-38.7436257179466,24.938244265213,"25"
9805.011719,149.670074,124.808212,2078.610352,1688.049316,-44.197624,-31.047375,120.796562,FALSE,2.27137885211161,-47.906279764841,"2"
1312.611328,89.085167,123.741783,361.042694,782.15155,186.996338,7.871546,671.70166,FALSE,12.956915678187,10.6413605895061,"29"
2279.400146,60.848072,205.360962,190.083084,-59.917389,607.380615,-14.503166,3221.049805,FALSE,-15.8458685767467,10.5727082145575,"26"
-110.924721,134.112808,252.413177,147.594223,925.88739,728.589844,-43.567734,3514.438232,TRUE,-13.1456414580786,-2.48304312970201,"8"
580.521729,159.233658,240.375397,194.287888,-30.822245,-3.917276,44.050041,640.08075,FALSE,6.38461675105432,36.9415302977902,"28"
1437.930176,119.878586,253.176529,87.481232,2.488558,52.020256,-12.583742,9369.162109,FALSE,-36.6627003855171,7.24926637962571,"25"
4062.366211,100.112007,287.568726,119.28344,6.28233,404.332855,27.14867,124.359467,TRUE,-29.687290737503,-24.0823003184418,"38"
79.650124,128.309143,255.334564,419.771973,2070.442139,1321.661865,-25.303274,4819.14502,FALSE,-18.5363217507114,-32.6469724822062,"8"
264.841309,57.790878,169.040985,397.970062,171.518265,579.091064,77.584129,-27.065653,FALSE,-2.15775125252618,13.8124517933022,"20"
6996.002441,237.91391,243.61319,3023.039307,1486.128662,94.252457,48.622044,-173.509079,FALSE,25.4590733914018,-38.8412464490258,"2"
206.687561,97.600655,214.099335,239.258469,221.562149,174.756287,64.499786,2613.370605,FALSE,-19.2831791418547,34.1400559914702,"10"
1114.385254,216.105972,326.227386,248.986435,33.343098,85.063614,135.639069,16668.646484,FALSE,-47.0089564976228,1.14961353169409,"4"
244.842255,76.72049,250.219376,73.589851,12.245928,1125.139404,79.282272,892.4953,FALSE,-14.8334118747544,-10.1677599176521,"31"
14430.701172,196.804031,126.812843,3004.404785,1334.981201,72.463768,14.17134,945.253723,FALSE,-4.26117324848278,-47.3353970367734,"2"
778.771301,116.512505,190.325699,742.093994,2241.631104,174.949951,30.619143,2400.598877,FALSE,-0.210027470761713,-11.7924449630977,"34"
1764.411133,197.072845,360.347748,95.140694,108.969414,65.36071,42.684578,9974.911133,FALSE,-38.2230194595684,3.06088594992358,"25"
153.810135,129.95018,129.54068,102.633118,596.168701,88.632706,8.573078,98.619514,FALSE,15.6465768802531,17.8583454909863,"29"
97.035774,78.527779,270.588135,170.817444,582.512024,276.198944,53.726109,380.821106,FALSE,9.48652844694355,17.2288707897301,"20"
13035.30957,185.080017,96.209892,3829.594971,887.802246,-14.219487,32.048878,450.845581,FALSE,-3.65660777475193,-47.2971456353922,"2"
810.067871,298.699982,150.483704,294.206268,89.701073,64.957481,41.178318,408.875153,FALSE,8.64104399060352,32.7687408526861,"28"
1721.513672,149.714874,144.182175,410.213715,967.942688,127.945633,-12.427582,93.325615,FALSE,14.7046472344463,4.28655306137164,"15"
7663.125,128.426941,144.69722,2132.041016,700.101624,-96.037346,53.933407,159.485443,FALSE,18.7543364777287,-41.5514280691294,"2"
337.391541,180.384842,164.01059,536.408508,1488.155518,101.259071,32.990097,2588.804932,FALSE,-0.876091527181939,-2.42999564967554,"29"
-176.381226,104.630539,301.202209,408.286407,541.435486,428.817017,15.175552,1639.005005,FALSE,-1.97105948020454,11.1321280686992,"8"
208.677582,168.544907,146.900223,169.593811,752.495789,270.338074,12.01381,1801.694702,FALSE,-0.10441191177217,11.2542723374009,"10"
2493.405273,134.974319,236.675949,77.932785,34.058765,145.787384,8.351296,5786.176758,FALSE,-29.8256652596807,11.8471694148327,"36"
7380.660645,133.995667,207.603394,2003.853516,1499.900757,4.129848,1.541058,274.602295,FALSE,16.0823116497236,-43.1969137983652,"2"
69.842133,150.186371,176.672836,207.646912,503.364746,166.658218,-15.817943,1971.670776,FALSE,-2.0390895094979,18.6868037802619,"28"
106.90863,126.227852,182.045502,186.002228,248.409058,342.508759,86.389603,1291.500244,TRUE,-1.24247702277545,19.9999228355743,"20"
62.547779,81.084282,157.830063,574.559631,1319.17627,559.891357,22.933372,3118.190186,FALSE,-7.98262150434731,-3.70960928251453,"8"
3468.966064,172.237717,275.104156,2497.410645,1908.585083,236.955399,49.274746,516.937805,FALSE,42.493033752618,-14.2010978964573,"12"
311.220062,86.90271,161.938217,590.524109,1539.545898,926.349792,57.534176,9828.755859,FALSE,-22.89036598848,-21.7320643607137,"21"
7460.930176,38.175262,107.985718,1721.284424,1167.868286,10.381948,37.277561,291.723755,FALSE,14.3041012534676,-43.7926119092645,"2"
166.254852,93.849586,178.821014,74.90329,429.002808,384.744904,-48.170235,199.1185,FALSE,5.96761139183052,17.5838049141334,"20"
1205.713135,216.833237,222.246063,297.473969,91.227715,43.366589,11.101377,-432.157166,FALSE,4.29072270338472,30.205367402222,"16"
3790.435791,167.504822,190.728531,2258.838379,1317.346069,-39.081635,-40.008099,316.317749,FALSE,42.7595985259925,-18.9846946378929,"12"
433.118774,55.045712,223.759186,181.421906,439.08139,89.655319,101.612755,256.664917,FALSE,9.33198732400808,31.7712727977476,"19"
120.688171,88.661163,163.94313,64.490242,381.242889,556.587219,20.733158,3084.751465,TRUE,-12.9205135855704,10.4527668482218,"8"
166.807648,182.876678,176.813309,259.664276,548.231384,105.982384,35.184929,168.402802,FALSE,16.4234942034199,18.6748087136634,"29"
349.768188,113.781776,190.274857,736.082825,707.448242,151.055771,24.912184,552.381104,FALSE,17.0010580255375,13.0400685394558,"29"
23874.558594,198.388702,251.031631,1740.217407,1636.781372,-160.151169,7.999346,171.983582,FALSE,-9.14571584908302,-45.1033945905081,"1"
11608.549805,130.125748,210.53772,2592.64502,1773.619629,22.293547,-48.294544,-312.838379,FALSE,0.357741832661539,-46.3069497259129,"2"
70.698586,67.382698,160.16893,42.087639,840.169739,109.873901,109.770798,2246.978271,FALSE,-3.07095749702727,10.4778964929428,"29"
-28.000683,256.11908,206.558228,299.240356,706.63324,152.125595,62.237999,125.341492,FALSE,12.8841287029932,14.8681099335672,"29"
451.490387,63.438438,157.005646,251.826736,942.883728,128.797302,26.520601,3252.385742,FALSE,-8.43962232707106,7.20612011893989,"29"
9719.615234,103.251595,201.855713,4380.292969,2674.618896,-19.475405,8.30943,270.53186,FALSE,4.79747037870932,-45.8310076893914,"2"
484.92981,102.526787,143.324478,385.551514,483.133942,161.956207,2.981157,962.75647,FALSE,13.1286278741841,17.5454595718795,"29"
15035.803711,192.809265,244.019928,501.622284,955.038269,461.585693,79.024384,10482.508789,FALSE,-33.0141904893236,-36.641014282119,"5"
1186.05542,110.963692,306.837036,88.958061,315.973907,613.301819,128.859024,451.550903,FALSE,-9.10359608136385,12.383017526308,"20"
3562.577393,248.275864,184.937088,227.109467,26.023682,260.30658,23.695534,-16.454998,FALSE,-18.564732933979,-0.831948005854558,"16"
185.407516,24.951391,226.679871,260.336639,1080.796021,-8.006557,26.719824,1937.485962,FALSE,4.27175986093449,5.92362340709853,"29"
2309.241699,135.088455,363.365906,100.78878,214.203857,133.595123,38.850388,16205.051758,FALSE,-48.6341897972081,-3.17675243741154,"23"
1548.465332,262.0513,319.291626,474.466675,738.558594,90.86734,57.308369,7368.804199,FALSE,-29.6072438475434,5.09155452558461,"25"
510.808136,178.417984,231.569733,162.094208,-148.579102,1137.002197,104.799355,4284.919922,FALSE,-17.4271065247902,-16.3567517574346,"26"
2416.317871,209.102127,309.646332,626.207947,772.634399,169.238754,243.612137,800.345581,FALSE,7.23053978757876,10.9272252887711,"12"
40.17886,93.556274,151.324371,222.435791,162.087372,290.997437,11.562817,340.48703,FALSE,11.0075320205598,23.2343560941513,"20"
6349.052734,110.092896,274.734924,5811.882813,2032.439697,-33.025623,-10.59897,291.941376,FALSE,45.4153869603523,-9.21181764137335,"2"
415.923676,107.444908,189.926346,125.774139,23.436419,17.561319,49.704601,2032.145996,FALSE,-15.2088914712558,38.2351953293048,"28"
154.234894,99.842506,151.371841,1862.535889,706.04657,248.224884,122.159126,355.607605,FALSE,19.0379281030624,9.86769073153093,"29"
32.615372,60.419628,238.4953,54.465912,291.873474,681.438293,36.958412,1388.920044,FALSE,-7.96638642954701,7.61221239399494,"8"
873.937378,90.414322,276.290009,225.654495,36.606285,69.607506,55.990799,9040.041992,FALSE,-37.8396880549093,9.89265342018165,"25"
3077.077637,209.53978,305.290192,237.790619,6.834012,65.385933,32.712673,5838.945313,FALSE,-32.3289321822715,3.05959065880378,"36"
1326.824585,279.566162,170.75296,224.978058,106.560539,233.08873,108.948517,1070.736084,FALSE,-4.01430374432312,35.4889249557658,"19"
284.811981,167.966766,234.255981,252.740738,708.504456,1050.826904,71.614258,4270.739258,FALSE,-17.8242568993348,-15.4563302477942,"8"
502.295715,259.289185,335.715698,192.300385,156.837173,281.251526,10.510174,129.006439,FALSE,10.3895781481696,27.5510110385157,"20"
353.483521,95.174248,195.461777,840.770203,1651.068237,179.223129,52.300396,4890.791504,FALSE,-10.1064287360051,-8.43697802608239,"8"
1795.325439,247.510071,233.537262,513.662659,51.151276,-6.804569,276.987091,202.569962,FALSE,-5.93396922618285,27.5543059332237,"19"
247.496307,88.249245,256.871399,50.757095,752.376465,50.700317,-42.117886,1691.492554,FALSE,5.8546638078707,12.3615903692502,"29"
15276.31543,158.523315,175.750397,1854.133911,1719.505981,-153.198456,-18.970373,170.001617,TRUE,-4.41693291829509,-44.7097517393542,"2"
-114.177406,166.855286,267.920654,133.247055,955.273315,1170.933716,-41.809006,4823.481445,FALSE,-18.9410208755876,-25.8603430495203,"8"
950.120667,44.5933,219.532501,912.084656,1260.342285,64.804924,86.3815,3122.115234,FALSE,-0.925650958657932,-1.67433201822553,"29"
428.371002,242.427856,127.516617,491.216675,444.929779,49.063454,-22.524965,2049.720459,FALSE,-0.15128174123767,14.2214991326641,"28"
7118.787598,242.304337,119.649406,1829.697266,1852.261841,39.141861,44.766006,433.759857,FALSE,16.8118514514476,-43.957901247429,"2"
-5.315025,111.171478,128.425613,235.749329,1600.077393,1498.425415,82.840317,1378.303711,FALSE,-19.5098200258395,-36.6538364229105,"8"
106.759674,121.524704,389.668884,45.376926,701.69104,731.448669,22.784903,4393.731445,FALSE,-15.6220426515073,-3.06077838014851,"8"
8820.689453,73.448868,117.30648,1938.249756,1459.970581,-13.356958,17.863276,333.065948,FALSE,3.9801377331523,-48.5599347332113,"2"
5456.588867,226.336746,170.806641,204.615555,128.049362,242.782852,14.626535,11217.741211,FALSE,-43.842085459604,-20.0029932341982,"27"
415.07251,144.16011,169.447144,86.212845,448.279388,168.684662,-26.884193,136.999329,FALSE,16.3055776773845,22.9888196651468,"29"
333.710297,-37.406555,214.633545,585.752197,804.871216,55.532261,42.178722,2431.36377,FALSE,0.505215971581589,6.58705361666029,"29"
187.576538,143.266815,199.586853,345.774384,677.949158,1747.233276,5.575256,1885.983032,FALSE,-21.6841416864714,-39.2121025966991,"18"
6744.959961,133.58931,273.601746,92.833717,414.798981,761.988892,0.248706,2260.538086,FALSE,-25.9800927171062,-31.8368951499044,"38"
11174.032227,121.283592,147.742996,2592.62085,1564.583862,-4.999546,91.002586,107.572472,FALSE,-1.30289073465535,-48.0336300005628,"2"
576.9776,140.390335,200.984009,75.711075,132.341934,249.903198,-31.629377,369.0354,FALSE,11.6916035715321,26.364693386773,"20"
1310.834595,130.474167,285.446045,104.999069,16.459694,106.410614,9.463875,9274.521484,FALSE,-36.3159022855043,7.47028916381533,"25"
12311.524414,117.094505,218.494247,2778.982422,1759.185181,2.964302,-22.368357,237.502487,FALSE,-1.56542797328764,-46.0717284938934,"2"
889.753662,134.893188,107.484894,40.448528,-38.910179,71.0009,-59.152618,1639.462769,FALSE,-4.63356395153472,27.8950427401247,"28"
1345.016479,166.179733,329.814545,867.904419,832.800598,169.126648,120.70475,4893.165039,FALSE,-18.9567610041842,4.63850472704223,"13"
712.594666,114.373619,148.656754,81.800644,107.755806,225.90062,58.253975,17.66238,FALSE,6.31603205537686,34.0589987279048,"20"
212.553055,84.757118,167.079315,540.500488,784.375122,12.013208,-13.319423,7007.826172,FALSE,-23.5949558723502,-2.68397760402479,"25"
469.378052,144.115158,135.667938,127.510742,345.568787,685.977356,64.999084,256.542389,FALSE,-6.05197785723058,9.52508453149754,"31"
911.197876,201.807571,618.645996,282.757996,595.792969,177.165527,29.827723,11341.026367,FALSE,-35.5185262930989,-5.19213301349329,"25"
36.97245,170.285187,246.629761,371.368103,280.175293,13.356232,-12.681636,1240.877441,FALSE,13.8144987311732,22.3003322072877,"28"
1078.148438,103.137383,181.499374,48.866783,18.098217,59.497627,-6.053676,4240.975586,FALSE,-23.5535527867899,21.7440193498731,"10"
1179.732422,242.788757,261.970703,600.047913,59.334202,239.583633,99.486519,5134.973633,FALSE,-31.8113506259915,29.0568898430322,"10"
302.656921,113.151276,252.773926,288.795166,2018.276001,52.052811,276.137207,368.701538,FALSE,0.958155241867022,-4.41736993443223,"24"
514.532593,170.640167,116.319382,243.916168,260.66925,72.832069,113.353951,2636.187744,FALSE,-19.98755600322,36.0317238385652,"28"
213.822464,36.676765,254.137909,177.398621,102.961319,34.712654,53.592518,288.098083,FALSE,14.4432921578047,38.6389718345822,"28"
21260.826172,22.087429,118.25251,1827.72644,1358.492432,25.100388,71.556038,-14.177692,FALSE,-8.72393910174972,-46.0806223008229,"1"
363.804413,200.539337,122.76506,191.347198,146.457016,65.271576,34.393703,590.528625,FALSE,10.3733590805308,35.5185763278396,"28"
91.531685,114.352928,107.375977,180.322006,454.973053,784.469421,116.603371,312.160187,FALSE,-7.67182529216973,5.23409727649084,"31"
21421.587891,208.433823,51.460697,4065.065186,2081.456055,-40.03479,-73.790161,191.638062,FALSE,-7.11504946416846,-44.7277767188165,"1"
793.478577,191.046753,131.131363,81.736343,226.706726,431.254974,102.649734,3677.081787,FALSE,-13.7445267845964,12.9626894099465,"10"
-103.540619,69.391701,300.14032,240.283936,1067.171631,287.468719,-12.381344,2689.468262,FALSE,-3.40613531650018,4.39210264796661,"29"
416.329956,139.417572,209.020432,1169.563354,1495.147339,106.10305,97.693474,334.302948,FALSE,11.7110871701783,-0.0687552247145944,"29"
17024.435547,130.076004,125.334511,4540.538574,2262.618164,-47.451965,6.900203,73.720856,FALSE,-3.92950872447709,-44.7309531262326,"1"
130.859589,180.655045,129.965424,120.906342,115.482857,506.932678,75.536842,2399.168457,FALSE,-10.4380605298755,12.796510417535,"20"
291.195587,119.640327,218.525833,509.136322,573.026184,261.673798,23.201763,204.525375,FALSE,13.4264074482393,15.9396450594668,"20"
73.297676,148.022263,305.658722,200.556473,534.42218,152.87619,5.307586,552.114685,FALSE,14.4677983134337,19.6909046006168,"29"
3053.566162,231.979004,259.184357,160.806656,127.019302,368.533661,132.342346,276.600952,FALSE,-16.9475928079319,14.7392422742037,"16"
-61.718689,204.015335,176.599472,408.671295,315.175934,332.159393,-48.156563,458.434143,FALSE,9.50917131772269,18.6478840445239,"20"
93.055367,103.941933,282.330566,480.230194,2210.953369,755.937012,11.58491,2993.761719,FALSE,-12.7277683067633,-20.8452273573275,"8"
41580.890625,169.582916,133.032288,4696.611328,2437.685547,-111.538345,-36.551598,1186.443237,TRUE,-12.8171271824335,-44.4388384362208,"1"
5441.558105,109.33065,55.434971,826.310547,1792.44165,0.000471,12.466394,-197.388077,FALSE,26.1647356411681,-35.2583146072837,"2"
768.019958,192.650879,177.159546,434.085388,1172.05542,214.426056,36.138428,451.456665,FALSE,10.7443807915431,6.28390318054418,"29"
8796.905273,115.1931,317.476746,3960.259521,2948.398438,-29.234482,21.891224,-110.470909,FALSE,10.9438936854488,-44.8232122835754,"2"
5433.549805,129.61261,278.234619,452.710297,-19.812187,91.870491,114.889809,4271.127441,FALSE,-32.0108853855136,-25.1056496390762,"36"
7928.998535,99.583046,291.385834,2240.393311,2037.659302,36.12719,32.667259,-171.963379,FALSE,12.7536722718421,-45.7199025146154,"2"
166.969055,114.280708,275.087891,441.302246,637.644714,205.463272,-14.315599,1216.136963,FALSE,9.01113192877133,13.5442552764154,"29"
308.129974,37.357071,304.74411,483.128052,496.312714,265.905396,53.25771,1135.507324,FALSE,7.29530264245333,16.1381573470449,"29"
129.089111,126.644539,116.443092,597.330261,117.769852,94.617775,17.852112,-131.634445,FALSE,19.7941571563128,22.3814354235413,"28"
379.257538,97.789566,119.260971,400.214508,970.289368,486.99826,30.761633,5692.70166,FALSE,-17.1067670742273,-4.09968985661363,"8"
4609.752441,219.47728,168.538895,666.629333,1025.146973,89.957855,-24.923338,6104.666016,FALSE,-27.8425753466618,-19.9651180604277,"36"
784.318176,253.484665,246.583664,86.310081,-20.642475,79.5467,19.794912,337.14978,TRUE,6.86255508856746,30.9405389810803,"16"
17307.369141,170.56105,141.678726,855.871399,1047.715332,-58.871407,55.173306,-156.436386,FALSE,-6.92747642323939,-45.9889860226127,"1"
910.756531,161.256882,181.452377,828.413269,493.910339,106.964813,209.296951,2823.23877,FALSE,-9.10042238982061,15.880842119415,"10"
22950.072266,132.668762,215.342361,2708.123291,1954.051514,0.931352,57.530991,-319.14267,FALSE,-11.501839688639,-45.1697683282253,"1"
494.076691,139.002731,128.942993,89.478592,277.583374,501.628296,27.880789,243.084305,FALSE,-0.6358957245909,15.621186869018,"20"
443.199921,143.916031,193.726746,164.518555,314.148438,98.836563,19.35285,709.584778,FALSE,11.7247741397715,28.5479056414179,"28"
557.441833,60.393314,92.807884,417.656433,800.579163,401.291595,116.622108,1017.008423,FALSE,1.36676792271339,9.75725239257178,"20"
531.679321,24.699463,230.067154,109.570229,310.213867,244.946426,82.774406,327.134674,FALSE,5.0904094366968,32.5532786841399,"20"
659.567017,90.435066,205.824051,567.877747,1307.374756,129.895889,91.344574,104.897667,FALSE,10.4849700821337,3.64549237022701,"29"
142.625641,76.676018,224.095413,833.084106,828.74707,100.185394,44.519852,40.631638,FALSE,18.4187758906501,12.4931128515299,"29"
20976.839844,138.913391,211.878632,2421.689209,1385.886963,-102.563187,145.759995,-75.257576,FALSE,-11.0369580158304,-46.7640403453702,"1"
-144.101395,-13.749686,289.754669,116.131363,938.194153,47.553535,43.443272,11677.161133,FALSE,-32.0223275478843,-5.62716827064911,"25"
268.898407,58.662479,274.877747,67.739738,178.971756,126.266876,54.468884,11593.677734,FALSE,-36.815783249791,-2.42086983535797,"4"
257.319183,51.15958,176.237259,133.396194,873.002319,153.724365,27.978771,369.533752,FALSE,11.7785746660928,12.4496960695506,"29"
8787.039063,195.29071,127.478951,4552.979492,1449.070923,-42.617222,-51.46114,298.584869,FALSE,13.4548960082199,-41.5858003070898,"2"
-306.219727,51.984875,219.295578,334.486145,1335.472046,44.243584,110.589104,6615.833008,FALSE,-17.8131182737419,-6.45153801108824,"25"
327.494446,183.777359,253.871323,1091.858765,1109.689819,206.956512,83.09346,3465.103271,FALSE,-5.82745585109164,-1.31604527537805,"29"
12949.866211,169.714615,173.247681,3572.190674,1536.121826,-25.958902,31.972668,182.149307,FALSE,-3.15357551539883,-46.7079237736481,"2"
445.141113,127.313774,279.119995,249.297699,1283.500366,197.223068,133.964554,4675.720703,FALSE,-14.3341940148456,-1.58703818238275,"8"
24114.482422,135.066422,227.801483,2816.223877,1430.156738,-127.568436,-48.230022,76.25547,FALSE,-10.948170799995,-45.7318047544432,"1"
315.082306,141.137939,314.565887,208.489166,979.737427,1497.412476,99.743027,7307.262695,FALSE,-21.6849307711723,-32.0920223686589,"21"
1490.325439,90.621498,284.739746,67.108025,113.552559,397.665344,-21.222645,5860.234863,FALSE,-23.8152078101392,11.3766927998509,"25"
9808.519531,215.16243,183.697479,85.429573,16.005209,51.345749,22.093401,4473.570801,FALSE,-34.9810886925263,-34.5535654523897,"5"
17.720154,74.488113,215.328629,296.436676,639.98175,116.703964,18.523575,644.083374,FALSE,13.943564792963,15.6758139828917,"29"
75.701454,66.306358,121.368042,42.397472,729.705322,897.30658,-6.408245,509.08786,FALSE,-9.48266828865076,0.36183001576249,"31"
7009.324219,108.527344,274.184937,1759.034668,1910.729858,34.496574,29.119205,45.92963,FALSE,18.6056008351069,-43.4432204337653,"2"
644.148987,139.766129,80.091621,107.448288,102.342178,107.200607,121.535934,-279.062286,FALSE,2.21588368554834,40.358779395519,"19"
226.707565,195.132645,206.883759,83.601677,220.665146,135.042755,5.46503,368.488281,FALSE,13.7065146915134,33.1296544108149,"28"
1061.252441,103.604256,74.834297,277.347473,934.663696,54.790165,-26.953539,2633.853516,FALSE,-2.040253633229,4.65584942940889,"29"
560.878418,204.550705,146.286423,89.201134,221.677444,260.84137,37.934059,553.58844,FALSE,4.86498088729778,29.309774157157,"20"
933.792664,112.238708,141.00444,71.61261,201.523056,47.050083,78.5457,7817.612305,FALSE,-35.6584348212354,17.1066573270359,"25"
299.775391,47.867512,121.791428,275.069,792.352539,779.80603,-2.362659,3712.680908,FALSE,-13.9389897818432,-4.64489684756927,"8"
-150.70697,42.722549,296.61911,-20.532085,84.954735,567.130676,-9.658854,8125.647461,FALSE,-24.8014334171128,-6.41765900137712,"25"
11976.65625,159.661697,271.827393,4030.994385,2059.731934,58.5117,7.446565,18.538475,FALSE,0.841181498079566,-45.169606180472,"2"
13624.160156,240.527649,72.356506,1516.016235,2277.326416,39.6064,83.089157,238.072372,FALSE,-2.83328541216299,-45.208208130222,"2"
17256.404297,151.075562,125.796089,2080.234863,2312.648926,-8.968999,37.330379,918.622925,FALSE,-4.83803857522394,-45.4772360382397,"1"
31.172293,69.446716,166.019043,272.77536,514.510437,208.072891,13.614163,2372.593506,FALSE,-6.51709583101111,15.8215821076966,"10"
14882.384766,-37.766758,155.688934,1955.204834,1344.220581,10.272913,81.436394,-318.753357,FALSE,-8.76042576826926,-47.4027779240496,"2"
113.930237,116.582596,249.954971,253.558792,597.026184,65.975601,-20.547146,-146.79216,FALSE,19.7116245928118,17.82158492304,"29"
2366.530518,221.481812,187.941788,-35.527634,182.919983,69.69397,17.593628,12849.948242,FALSE,-46.4507419785205,-7.3971088770422,"27"
-22.88217,193.590683,238.234314,241.621307,816.99353,93.682129,-37.449757,650.934204,FALSE,13.0118809926356,13.4645799266594,"29"
199.861023,61.464363,201.64743,44.667053,1283.160767,230.272797,127.704285,74.69899,FALSE,6.34835434319859,6.161273706911,"29"
4034.979248,150.490692,133.207611,86.766052,114.417511,573.447937,8.36326,2321.212402,FALSE,-25.4423458959089,-5.87461963751075,"36"
-357.024536,121.985855,183.539246,-75.592957,133.921661,398.942047,62.456959,3989.239014,FALSE,-13.4983186383821,10.4681680220227,"10"
2714.97998,108.452522,279.658539,-8.791224,315.670685,180.820694,56.662472,6976.137207,FALSE,-32.4506632744075,3.57647826479018,"25"
2144.52417,171.807663,225.609207,-2.275457,494.975769,713.251831,-37.011848,7154.083008,FALSE,-18.4842815848765,-5.04772099172422,"25"
412.673218,177.839523,236.318512,17.601398,-43.364433,463.352081,-12.381179,4557.854492,FALSE,-17.6460429563257,11.2579657795826,"26"
42.328316,269.656158,267.366608,1536.597534,1633.280396,311.736511,13.719515,413.397095,FALSE,9.81997715056195,-0.0242438224382477,"29"
-247.737274,123.136253,198.321396,-27.766886,379.671173,119.063568,-24.735199,1535.302246,FALSE,2.49991662893562,26.0985377088135,"28"
21786.193359,222.867661,224.181168,2865.139404,1717.752563,-46.721867,-11.705345,-155.389862,FALSE,-10.5658604086778,-45.2730279026979,"1"
-370.281586,171.938004,279.424408,240.88353,311.114136,108.547836,-52.411396,2702.26123,FALSE,-10.094532593653,24.9730511299704,"10"
232.541458,165.708649,162.30014,95.87603,102.98629,271.605286,104.105392,-291.98468,FALSE,6.17238083448945,29.3112708049296,"20"
-301.798889,128.409286,139.240219,243.320206,686.050171,122.061172,-50.7589,-49.661392,FALSE,15.9896272007947,16.3543363873225,"29"
7010.100098,11.008614,35.766682,1186.197266,1252.894043,198.848679,4.027191,-184.645432,FALSE,14.7624153709826,-44.733815701998,"2"
11839.599609,29.321875,192.816208,225.114304,1010.929993,276.704742,-2.895826,2773.892822,FALSE,-24.6307788113258,-38.4357635160035,"5"
1565.620483,167.696548,277.763855,-45.6609,114.882355,963.62793,-25.437738,6994.214355,FALSE,-15.695968739615,-12.82648625651,"26"
-484.11261,154.88916,146.38002,-50.374855,886.114136,391.209625,-17.856169,277.976379,FALSE,2.53832573111662,10.5905949053918,"20"
258.173187,242.768784,186.730148,-24.44833,-83.451271,462.09436,60.851032,3518.202881,FALSE,-12.3417131419126,12.9523018896736,"10"
-462.403076,197.865051,263.200806,-52.029118,922.023804,421.907715,68.375175,6964.987793,FALSE,-19.6869526878876,-3.7046023264808,"25"
157.723099,255.423843,315.010254,-109.887886,152.098526,147.651962,72.562492,7453.541504,FALSE,-35.6918070981569,21.5025093349122,"25"
-315.754547,64.284721,310.820587,186.272644,938.29895,138.462189,-14.415714,3156.923828,FALSE,-5.20730686501524,6.20829093469804,"29"
9797.657227,40.070808,159.203217,2389.936279,1369.638428,95.93,-87.308434,-583.41095,FALSE,2.31552994116755,-47.543192574346,"2"
8336.727539,168.00322,122.606964,2954.606934,1710.853027,68.407608,13.721347,-569.040527,FALSE,11.3887048881448,-46.4463942144812,"2"
1771.108521,146.929306,290.820587,271.481506,1200.496826,187.118423,273.11322,115.840439,FALSE,8.82125193723149,6.11639103723595,"29"
-20.554949,237.988998,186.132553,-72.14743,338.937805,386.783264,67.157822,-154.995651,FALSE,3.78459052548267,20.5236572356655,"20"
-299.101807,200.508408,320.843018,57.465775,115.401863,97.794617,51.962475,5666.013184,FALSE,-33.1746021428745,27.3580340449941,"10"
-268.251465,118.701164,249.646133,48.33601,1626.529053,1399.855225,36.24752,4046.674805,FALSE,-18.7231714289195,-34.4105767817392,"8"
254.808945,113.61734,168.331726,47.263744,633.516174,788.791626,41.02869,-210.164658,FALSE,-6.98908393286316,5.74738520396351,"31"
18577.855469,93.381683,210.012863,2673.952148,1741.148071,1.238029,-30.759665,-522.673889,FALSE,-8.63407906887866,-44.9570548415218,"1"
718.848755,128.84314,191.775238,12.729018,14.969049,239.263565,-21.856373,1719.161865,FALSE,-9.26427935721894,27.8729781627738,"28"
359.117065,175.339035,330.593506,-80.932884,-1.898421,129.013748,34.077648,5449.782227,FALSE,-29.840358439956,24.0949666488241,"10"
-50.150654,115.975037,197.847137,268.148376,2011.393311,978.525391,62.608772,5929.803711,FALSE,-17.6165010414952,-26.6260309422961,"8"
-65.684555,146.455933,205.997635,45.411499,948.45929,1011.052307,73.374268,7113.566406,FALSE,-21.9019049264367,-20.6477206511245,"26"
-90.099182,66.480019,218.645157,-31.380228,165.895584,687.230042,2.589511,-344.562225,FALSE,-2.45954347229351,10.1473401520625,"31"
46.416733,68.641251,236.868378,350.08136,715.103516,128.696716,14.487319,-99.295296,FALSE,16.5304787837157,15.3323832734237,"29"
977.897278,190.168686,278.827606,42.827522,295.364197,123.132065,65.81868,6795.641113,FALSE,-31.5456997438317,18.6783598772458,"25"
3649.764893,255.295242,265.671021,107.22525,70.558098,112.716164,75.245728,7160.984863,FALSE,-38.318401469616,-12.9301162737409,"27"
27110.423828,148.402084,286.557373,2782.638184,2231.258789,-25.302208,21.443014,-51.647774,FALSE,-11.8909761574915,-44.0481135400666,"1"
404.376709,127.067436,217.590561,277.006561,1487.427734,287.246979,45.4814,6361.160156,FALSE,-17.897394810617,-8.20590360155626,"25"
1318.55249,98.616219,166.523544,917.865417,1252.232422,222.706635,986.488831,1469.251953,FALSE,-4.52701738321527,3.19456520124301,"24"
1228.13147,163.939865,268.534485,179.768982,288.574371,658.691223,40.72271,4964.770996,FALSE,-17.391080600784,2.46317236261488,"26"
7307.486328,132.289078,190.647705,2864.408691,1846.927612,29.127748,32.246128,-46.656063,FALSE,20.7925541344471,-41.6299438851216,"2"
61.494492,126.560478,162.82515,38.839172,473.507996,101.633873,83.730003,-150.10614,FALSE,12.6018313132272,25.1258698129493,"29"
8856.143555,132.436203,121.592255,2353.537598,2140.141846,2.590723,-26.569864,-439.916229,FALSE,8.74500742025244,-47.696268849622,"2"
-371.440521,142.375748,183.518936,139.787125,418.814484,90.71582,12.593069,-147.280655,FALSE,17.8434061037776,21.300690232723,"29"
9339.286133,125.700249,96.277802,1768.424805,2066.892334,37.565521,67.218605,-600.762817,FALSE,5.31704543449835,-48.5358597405048,"2"
13272.21582,153.815414,162.923279,2382.552002,2187.074219,34.534214,65.1772,198.244888,FALSE,-2.25351617331803,-45.3531610583519,"2"
-62.216297,181.900925,274.66687,492.121307,460.941986,1761.928711,90.852066,2760.000977,FALSE,-21.8231877124423,-39.0133103218056,"18"
100.555351,129.285355,320.857574,507.624115,1513.108521,111.225853,35.80135,4411.23877,FALSE,-10.045585132494,-6.04514091177195,"29"
13582.654297,20.376827,93.294525,3170.91333,2202.843018,30.28706,118.517563,-240.956818,FALSE,-2.54080358734636,-46.1092007466001,"2"
12813.228516,72.694145,122.902473,2561.879639,1138.130493,-61.250134,-13.699281,-524.907959,FALSE,-4.60896916772844,-48.3502498986059,"2"
7617.324219,509.254242,242.978714,3920.845947,3223.611572,164.663849,237.301605,-492.121887,FALSE,20.4614374135913,-42.0734606117593,"2"
-364.944672,45.60957,179.731064,404.491394,940.117737,149.040451,67.154282,410.0159,TRUE,7.92550011126841,13.0948169069546,"29"
90.849243,130.828979,212.09964,84.412956,129.403381,3644.247314,38.778625,8354.97168,FALSE,-17.0104333575689,-40.8694344226743,"18"
-525.845947,33.416607,127.717743,237.372528,1898.407227,1224.07605,12.024323,1384.431519,FALSE,-16.3107694703969,-32.0589864725779,"8"
5962.807617,176.433701,192.480972,3301.105225,1412.866455,2.800106,-2.05408,-69.169159,FALSE,39.4670210664605,-30.1904689482841,"2"
0.417681,54.088207,173.169983,354.489838,1189.151123,158.270935,51.800201,2643.85791,FALSE,-2.21626649018639,1.21982032778028,"29"
-193.192749,102.451485,168.603943,49.488567,558.141113,21.94179,24.313112,1444.97229,FALSE,5.18349865843939,22.079833317991,"28"
313.579285,139.465302,235.513962,838.776123,844.26947,184.374023,-8.115679,2012.982788,FALSE,5.22370685395715,6.41088146229252,"29"
-232.056458,273.391876,212.67662,990.237305,682.856567,583.930664,134.49379,5796.710449,FALSE,-15.4940263863241,-4.52885139042328,"8"
2054.550537,163.629868,119.303482,89.28302,197.35791,364.792358,53.731998,1790.007202,FALSE,-10.3459812481501,24.3312570127318,"36"
1813.433472,131.505234,283.259705,129.926346,-11.296545,127.92318,4.201297,9438.662109,FALSE,-36.3498687457409,4.16893586779731,"25"
-155.50853,237.543396,299.964294,484.01886,559.431396,267.539154,99.32518,-199.466003,FALSE,11.9980175752284,17.5375670505949,"29"
1951.497925,109.174156,239.219345,277.549774,596.372864,197.704941,7.151313,6202.248535,FALSE,-28.0316915477283,13.8211614472008,"25"
-438.621216,169.910309,212.339554,531.600159,133.224808,104.467659,54.713211,3011.537109,FALSE,-17.8107632313885,28.7607977774658,"10"
-177.764191,172.331055,207.486099,923.81311,1622.151123,496.114594,64.901695,691.240295,FALSE,-0.0636516445356913,0.948832884163255,"29"
655.940979,160.541489,371.632935,185.2957,126.20401,52.902992,85.572678,12400.106445,FALSE,-40.3478576355299,-1.50917458048755,"4"
-237.664291,36.28635,172.962311,619.75885,758.362671,53.406204,78.271049,708.263672,FALSE,13.4729175686277,12.0582297200693,"29"
12346.802734,200.041351,305.059845,3790.327881,1999.435669,94.059586,34.388783,-60.822414,FALSE,-0.182881476981427,-45.0214242372316,"2"
-99.680214,177.2202,183.910324,463.457855,243.03923,148.668365,52.399464,3131.338623,FALSE,-18.1934816202564,25.6116284948702,"10"
9720.404297,199.067947,190.491852,2453.779541,2226.821777,-9.29769,49.263947,-22.488853,FALSE,5.23631306789731,-47.1580304251399,"2"
7795.254883,60.580837,130.161896,1724.043213,1548.931763,37.031708,4.65253,-574.664856,FALSE,13.745582371459,-46.3538267162512,"2"
-323.20047,34.279427,136.157837,859.421936,518.688904,101.102531,23.580093,-51.073795,FALSE,20.2426048531074,16.6162315526293,"29"
1397.597778,41.802437,154.668274,370.345856,461.782898,756.052429,-43.757393,319.295593,FALSE,-10.2815433290418,6.16275552893007,"31"
295.80658,81.367203,314.297333,920.537048,1378.547363,205.562881,11.338001,4586.117188,FALSE,-10.5836402712478,-4.60359259186398,"8"
-27.425127,50.219414,223.988464,81.251251,656.012695,1167.79895,5.983871,7804.166992,FALSE,-22.8656598162325,-26.6018114974573,"21"
24965.214844,143.348572,66.804703,5640.119629,1910.502563,-166.033417,-99.491959,84.614342,FALSE,-9.96195611726924,-45.2000387801681,"1"
4654.686035,13.634189,163.193008,1350.101929,1002.557312,63.233887,-0.057319,-141.180069,FALSE,37.9685973293959,-26.0374744784154,"12"
-197.734039,78.799355,271.439636,187.37088,1800.027344,1668.429565,83.741608,6466.247559,FALSE,-19.1551152883541,-34.3498659815203,"18"
-72.478775,281.933777,236.913773,1072.015137,1328.650635,183.567123,170.289627,133.756805,FALSE,8.15107206275088,2.42504564248524,"29"
6351.753906,35.966293,215.939087,1462.685425,1273.609497,-61.367798,41.386536,-132.325043,FALSE,29.7880247343793,-36.1454493496375,"2"
2845.442871,167.86171,190.984619,530.556274,1319.065796,-42.017807,54.624596,1662.543457,FALSE,15.9848279096484,-14.7040457915023,"12"
-108.839638,89.596901,154.92717,453.829224,534.872437,179.026245,28.173971,-401.081635,FALSE,17.738037425462,18.2301524793918,"29"
660.508118,143.572632,137.173721,107.198296,748.273743,474.615417,-13.490032,-112.313484,TRUE,1.6516347109576,9.70940469184074,"20"
9119.357422,241.375443,132.592651,2818.61377,1946.70459,-76.497414,-54.019684,-553.213684,FALSE,7.53038763932914,-47.339400380019,"2"
2775.759766,104.292488,253.007019,212.1689,250.319016,154.340958,70.030457,7508.979004,FALSE,-33.583392490793,1.67384482404067,"25"
122.407753,196.713333,139.681976,919.16687,1641.890137,244.746567,26.905531,2101.16333,FALSE,1.63898438047142,-3.80524941430695,"29"
13771.295898,131.727554,233.303375,2075.438721,1300.805786,86.33596,66.160423,-287.279236,FALSE,-6.71378685926798,-46.6961097591827,"2"
1411.64563,225.246826,262.429382,128.246994,1.85246,28.948841,126.206177,6785.186523,FALSE,-31.5659241568258,15.6091859026397,"25"
2556.044922,59.478584,364.913818,116.459686,-191.318954,98.399055,-11.745337,5411.304199,FALSE,-29.632837017847,10.3425870496354,"36"
-192.947632,93.004005,232.927277,686.460571,359.195068,134.351761,34.906933,-271.582184,FALSE,19.9221450960585,19.0490354220532,"29"
174.756088,113.798225,192.843323,116.703278,-9.886688,69.408554,21.071531,4165.285156,FALSE,-28.7525835985665,30.3206833722183,"10"
-42.977951,73.604843,133.924026,152.559875,314.498779,1202.848022,46.263226,2730.257568,FALSE,-16.5596890574984,-20.2762490198773,"31"
8502.638672,88.141701,251.734818,1390.851807,1527.953369,-26.346949,63.847435,-303.611633,FALSE,5.89369955086216,-48.288088150937,"2"
1964.705078,163.239914,170.806335,752.588318,825.552734,658.651123,11.954508,2281.573486,FALSE,-11.0450655484174,3.99040326133977,"8"
439.159119,101.123886,222.606949,583.149658,1449.980713,80.804306,54.640175,-310.310272,FALSE,10.7423529028347,1.43029382482259,"29"
-260.107819,128.499023,220.189758,180.969391,776.876038,1235.800781,19.276991,7464.328125,FALSE,-23.279651516991,-28.8884809396636,"21"
10191.077148,152.207138,260.886658,78.439812,257.473145,38.611652,77.286781,14306.869141,FALSE,-40.3239026627305,-32.4114804510851,"5"
-311.728119,50.6124,231.600708,933.909912,361.419647,311.401947,37.451786,4394.641602,FALSE,-14.0830935637709,7.23722076835806,"8"
-191.805359,177.869263,209.887405,254.712814,-13.766529,86.191635,23.433758,-51.916546,FALSE,16.8585299443406,35.0630082939929,"28"
-233.301193,145.454102,56.507442,204.419571,1360.796997,842.093445,-27.088503,1298.946045,FALSE,-7.63530467734332,-5.47376231927697,"8"
174.143982,204.541153,222.054855,44.384701,996.129517,662.865295,81.654549,494.284393,TRUE,-1.06733060634824,7.65917265449968,"20"
237.754944,171.494736,264.831177,806.75708,1321.803589,89.588326,47.666641,3768.301514,FALSE,-6.46944759379713,-3.17447231491832,"29"
19572.005859,250.71138,227.18515,2311.019043,1975.684448,-19.403028,-9.740767,-383.059204,FALSE,-8.52365080247785,-44.3154448915782,"1"
4540.432617,96.200836,334.299561,76.697617,102.812775,59.238449,53.907101,17272.181641,FALSE,-51.8867068160719,-6.2548267417528,"23"
151.813477,209.413437,241.900269,260.889038,-71.436554,117.939415,94.29818,2521.489502,FALSE,-20.8768610940969,40.1490999646794,"28"
21412.496094,113.118553,141.793579,1333.675415,1373.752075,36.204842,-24.369095,431.041199,TRUE,-8.19127760823907,-43.9688050354634,"1"
-150.96875,96.813408,215.652893,381.809387,378.764832,51.426796,60.423592,200.862473,FALSE,18.2290444065996,23.1397589198852,"29"
318.636322,98.599648,111.177849,779.427063,1612.117798,114.385513,49.559444,3727.590088,FALSE,-6.55747508971869,-7.47690949384376,"29"
-5.989392,122.474335,185.662399,140.875015,-62.461987,311.490356,36.181789,164.761749,TRUE,5.94203172288321,22.858111374939,"20"
31.782301,150.937469,121.778358,102.481514,40.000927,118.531654,16.754982,1712.763672,FALSE,-12.8488020207462,38.881409014582,"28"
3110.847412,227.130692,208.308792,255.919571,49.57449,648.401062,76.742851,1346.937378,TRUE,-10.1454261645374,19.8967044289177,"16"
1997.718262,149.931213,285.655273,359.081573,981.109741,435.327942,51.838612,8886.733398,FALSE,-28.0945686580595,-4.07315824863495,"25"
7348.12793,149.663666,216.504776,4849.455566,2399.299316,23.264606,-2.628356,108.271637,FALSE,23.1799478470905,-37.8638677546783,"2"
1423.316772,126.17086,135.924301,88.826202,372.812958,194.539581,32.61195,7126.381836,FALSE,-31.0432713955732,15.1201758152755,"25"
9018.886719,113.119583,105.626175,1434.030273,1743.429932,142.339188,28.892746,-335.625183,FALSE,4.44610852091893,-48.7432172151865,"2"
184.668091,146.033981,251.364075,291.779205,533.551636,155.742996,45.559875,992.30603,FALSE,10.7859783427957,19.6152930349879,"28"
1685.983398,112.667969,237.569885,743.245911,632.618713,135.597168,39.689449,531.748962,FALSE,18.4102216299069,10.3484598963723,"15"
8383.176758,68.064926,246.449539,1201.070557,1377.512085,-73.994499,31.362616,-57.904819,FALSE,5.81860989919144,-47.866183312814,"2"
167.586105,164.099426,204.819489,834.295349,1039.984253,41.598866,29.804583,5179.485352,FALSE,-15.2269186573428,-1.9608184593262,"25"
186.433975,138.67749,217.239365,562.638611,1500.510498,244.061737,58.215942,-303.099792,FALSE,7.99673362278781,1.47987174377906,"29"
924.846558,93.675507,132.683456,109.440186,219.934204,756.766174,87.06694,281.771759,FALSE,-10.3272040477435,7.73553797289352,"31"
7350.408691,110.451141,115.839745,2207.127441,1453.627319,125.841949,63.448574,-360.62262,FALSE,19.1551250813448,-42.9880509303663,"2"
79.341103,169.458755,171.524811,561.462341,434.121429,87.651825,61.376659,-36.123955,FALSE,19.3454139716767,18.9510648339777,"29"
-37.325085,108.611198,249.921707,689.509094,1232.666382,159.39241,27.418198,4247.04541,FALSE,-9.79370451245836,-1.78998117745739,"29"
6606.63916,34.63665,188.106735,1697.706177,1414.674072,72.702469,-21.958464,-555.017578,FALSE,26.620963563146,-39.596014327488,"2"
25660.457031,150.127701,102.453125,3033.477295,1357.332886,-136.114395,98.167961,73.933777,TRUE,-9.83757765942785,-43.778330112034,"1"
283.272339,118.248596,387.365631,1134.070557,2366.817871,536.52002,52.111336,4396.004883,FALSE,-11.6225085509738,-17.9988063826634,"8"
303.137939,149.485977,172.729156,218.096756,681.72113,120.76622,72.071548,-227.952652,FALSE,14.1541642218347,16.4218766257671,"29"
59.043732,71.280426,162.019806,156.29332,716.064026,66.399605,15.487102,-39.770836,FALSE,15.4540610058245,15.9880414015507,"29"
-26.448662,23.888453,221.055344,176.960327,789.173645,2039.170898,43.86557,2607.983154,FALSE,-21.69080314009,-41.3557425197423,"18"
271.910248,179.681015,255.054398,374.440765,563.902222,1161.536499,-20.395424,5093.445801,FALSE,-20.4177404666725,-24.717154926509,"8"
-259.932587,157.211243,191.217545,188.899124,1191.2052,116.725555,30.866795,416.188354,FALSE,9.34054556738475,6.45881759946963,"29"
3123.945557,229.8284,314.315002,290.481873,385.161896,726.858765,25.673292,8893.238281,FALSE,-25.8623792994411,-9.46024576657996,"27"
85.582893,158.947357,494.296295,604.96344,758.103027,69.925919,68.217224,9878.543945,FALSE,-29.7886937182828,-6.90051728716261,"25"
239.004898,186.006332,231.079163,157.6418,-65.061333,39.222843,13.125251,300.43396,FALSE,15.107530998499,34.164561382528,"28"
13645.067383,113.887146,229.233978,2319.049072,2096.6875,-59.48616,90.627548,-51.641228,FALSE,-2.70474879586711,-46.3107102336118,"2"
6290.005371,106.824493,222.743225,3429.107666,1570.203491,51.511162,101.348618,364.942291,FALSE,33.5509258727986,-33.6886175300724,"2"
1949.040527,37.960247,339.521698,112.564255,15.55374,134.272354,135.421631,5952.26709,FALSE,-28.2935972249195,14.4783617193129,"36"
1321.707764,177.740036,241.569107,201.984482,206.175156,321.063507,25.417961,-170.884003,FALSE,2.01735427577875,27.284321909285,"20"
-216.963348,106.80806,223.156281,535.254517,1182.401245,156.82312,14.02844,323.232452,FALSE,9.85630656287448,5.82183516788496,"29"
3969.082031,115.075043,192.195648,4206.356934,1871.163818,69.174904,-11.979217,462.165771,FALSE,49.8500763910607,-2.35903122529391,"14"
7.238782,113.782288,177.116104,96.54245,602.80304,1069.525391,45.742855,4322.396973,FALSE,-17.5498111867838,-16.7057122108831,"8"
9261.19043,191.885147,93.97612,112.470329,1173.052979,1009.268677,49.849525,4192.174805,FALSE,-15.1732541578442,-31.2206713202911,"5"
375.215149,100.997086,217.652191,221.257507,1006.978333,142.848267,21.12797,3155.229736,FALSE,-7.04425967371369,6.38294565960086,"29"
132.470413,216.49675,253.758118,477.162384,-90.41243,188.95816,35.186981,814.243164,FALSE,8.97460304770836,34.6244177443243,"28"
-69.356407,195.327362,203.997604,362.705963,990.058228,209.199234,-7.159072,1360.905518,FALSE,6.44624566429639,7.52254655906469,"29"
1097.772583,144.433563,238.240845,216.458145,-171.488586,27.397898,88.303139,6143.810547,FALSE,-32.2099355845587,21.5720977434708,"25"
16983.529297,56.937798,146.632019,2677.454102,1478.036499,-95.20417,-12.26352,691.631592,FALSE,-7.50100339969812,-47.2371558933962,"2"
273.673615,148.429581,367.766663,1260.147583,1948.504883,373.272766,1.675566,4042.604248,FALSE,-9.48637925500379,-12.7542838761188,"8"
697.577759,124.697693,123.920586,250.326492,1228.989746,413.589478,64.072578,2678.859131,FALSE,-6.18172425353558,2.19658868511967,"8"
244.646622,126.90741,297.83316,686.039856,586.940552,121.164352,154.444412,2919.960449,FALSE,-10.627901182701,17.3006689800088,"29"
334.55957,73.849846,232.773804,384.297363,103.836761,190.896301,-12.483109,-147.063232,FALSE,16.5018577561248,26.8264075595001,"20"
1092.826904,241.635971,275.271057,266.881622,1029.262573,1024.296265,36.494297,2241.891846,FALSE,-14.0994417995722,-11.0715687862022,"8"
833.27002,26.047134,118.49292,135.859039,219.239151,23.416006,55.733135,3283.818848,FALSE,-24.5484901522088,32.4047976848298,"10"
2107.057861,163.409439,136.720444,1124.659302,2488.490967,124.692406,306.907959,-289.803711,FALSE,10.4936000651771,-20.5434190487639,"24"
805.944885,162.334702,174.039627,-10.507782,391.078156,42.763927,82.582306,8999.770508,FALSE,-35.9252913721904,9.890202588436,"25"
138.483109,-9.70665,157.7556,783.895996,1011.002808,184.265396,-5.907764,4767.029297,FALSE,-14.7660148031293,0.296759127198978,"8"
1563.268311,34.361904,171.641953,109.313843,193.921844,83.202888,-5.940341,14470.05957,FALSE,-45.1521902856569,-4.12136274119853,"4"
155.289551,75.593475,223.242844,252.854309,180.054718,92.885468,33.718758,6332.014648,FALSE,-36.1573462092282,25.3736016520517,"10"
1695.710327,121.960411,289.156525,235.772522,135.251923,95.335396,67.656326,11337.233398,FALSE,-39.8559999504423,-1.81128257737081,"27"
-61.214157,85.963974,221.066254,301.412811,767.31073,120.535606,145.073532,560.822815,FALSE,8.96796687332527,13.3312035398498,"29"
-109.474098,28.623774,269.932556,174.830826,557.31012,104.732544,96.906723,-8.568417,FALSE,13.0605533215286,19.6221975436188,"29"
301.647095,148.76152,269.837219,174.32431,68.059982,381.092407,46.365036,1185.720337,FALSE,-0.988098021447035,19.2679075880539,"20"
8700.895508,46.072159,157.219299,1515.269897,1691.036255,85.746552,-37.199543,-57.943535,FALSE,5.19225975441511,-48.7048673963706,"2"
891.129211,3.494131,231.261047,835.089966,2361.18042,135.807938,63.758698,484.432159,FALSE,6.57733864058992,-12.83299391962,"29"
-15.395107,65.275566,285.543579,341.569,1959.989258,920.048096,40.957932,7828.385742,FALSE,-22.1113807453809,-25.131921547983,"8"
30.719267,46.556953,216.121994,797.239563,709.455139,10.015652,58.959217,-54.118847,FALSE,20.3111934237776,13.6203573264241,"29"
1807.813721,121.364578,303.15976,96.427399,22.43911,121.148987,124.327682,9871.594727,FALSE,-39.1719201560268,3.31322191179199,"27"
241.414047,133.926865,202.997543,529.745544,401.532684,59.006393,52.032639,3097.799561,FALSE,-16.0436265951118,21.7455515346514,"10"
7010.762695,103.884331,135.34462,2857.074951,2423.016357,-53.568726,57.05019,97.928398,FALSE,21.3950931894964,-40.5338305246289,"2"
11675.719727,124.874077,270.654449,5298.130371,3236.303955,53.965626,51.944988,205.228149,FALSE,1.1207483466705,-44.0511516202602,"2"
1344.319336,116.56424,296.800354,150.950729,-234.389984,24.435419,174.67482,13003.052734,FALSE,-43.345023432179,-1.61856597550552,"27"
-231.93486,117.846207,142.279022,323.396667,2047.212036,416.688141,33.040966,3724.935791,FALSE,-8.2452656780837,-12.5173605732106,"8"
16467.425781,172.477219,142.698044,2591.371338,1598.112549,-40.80426,21.544119,-261.703247,FALSE,-7.54620984995356,-45.9316063438582,"1"
13751.916992,58.603092,111.538986,1514.950562,2159.557129,-61.555374,52.091743,365.917145,FALSE,-3.67624632190461,-46.1311262825027,"2"
8120.520996,113.978088,252.860153,1871.777344,2285.793701,8.45902,62.097301,84.606552,FALSE,12.3090548232937,-46.022540156196,"2"
1820.993286,43.114918,288.781403,242.681366,-73.709747,-77.864326,-8.789775,7558.203613,FALSE,-36.0867761857101,14.6172072066219,"25"
-120.075508,73.534668,139.259338,243.629074,357.286621,94.928322,3.210261,291.625488,FALSE,17.8661647251056,22.4724549950305,"29"
19267.083984,197.13916,269.118835,2789.159912,2086.392578,-9.970376,99.341087,-132.258881,FALSE,-8.3068836674439,-45.0510055225356,"1"
731.000427,247.514725,323.589661,224.429245,467.65921,199.198547,-19.72673,1302.332764,FALSE,2.20644320121052,21.4781014846446,"29"
-91.885757,106.647995,264.810211,452.775513,1308.807129,194.84758,146.689667,1654.744141,FALSE,4.07426155401208,3.2163952531346,"29"
241.936539,175.053741,207.625229,259.473358,712.053894,906.748596,56.605358,1793.095947,FALSE,-11.8450637496578,-2.11329719084132,"8"
403.658112,186.548828,385.225739,151.616531,59.728848,-22.019598,-50.837234,479.05957,FALSE,15.6479165102251,30.1925283320668,"28"
4825.242676,154.529709,346.659576,2987.352295,2963.840576,135.509186,82.479973,193.04425,FALSE,29.7894696914368,-31.134416783439,"9"
39.336754,188.497818,244.89502,103.738434,1723.321777,2388.287598,147.298431,7275.587402,FALSE,-19.2933389813717,-39.0312052153109,"18"
358.095215,113.146423,246.918808,434.549072,754.009766,475.435822,-0.389802,2220.487305,FALSE,-7.34227472813745,6.51253555235559,"8"
477.19696,102.150047,316.976227,519.081482,643.752441,156.080109,61.74612,784.626038,FALSE,14.3859195538431,15.3422702722129,"29"
826.06604,194.049957,303.210541,147.179184,39.431988,346.468262,72.276443,1621.792969,FALSE,-4.36857679024545,22.5986817311263,"20"
666.426086,110.704269,180.449097,160.461929,88.15374,162.876907,15.136333,-137.170547,FALSE,11.6791095463694,30.9742504249773,"20"
406.71286,92.238388,146.316437,85.217628,121.192383,108.071129,106.44706,91.353806,FALSE,3.98473867714213,43.1212211582831,"19"
340.956512,191.975861,230.180084,349.533203,744.492188,143.206421,10.576673,2936.584473,FALSE,-7.7089181936489,10.0830651404192,"29"
973.397827,114.280891,287.605438,175.199814,1254.260132,1875.185547,91.795517,6068.464355,FALSE,-19.7471264086702,-36.271385646354,"18"
987.806885,214.784546,264.012787,537.082947,1191.50708,153.730179,73.933174,1899.030762,FALSE,6.35591095042215,4.95739867434384,"29"
-4.927359,110.222397,216.358292,175.909943,49.907555,72.968735,4.868488,8042.680176,FALSE,-37.1073828111203,17.544320914638,"25"
2477.766846,118.764702,256.906708,54.826641,187.00946,302.156738,39.619587,10498.3125,FALSE,-39.8317880218119,-7.72302998641918,"27"
-127.701843,110.378876,244.405151,125.347771,1399.71875,39.767799,38.480637,2386.290283,FALSE,-0.922506844754109,-0.461660329116082,"29"
1239.448242,128.913544,197.766708,150.77504,94.457909,405.31189,22.873352,1282.309204,FALSE,-2.53473416330166,19.7672769102963,"20"
30329.472656,195.633591,231.696533,2694.526367,1967.083618,-119.473206,37.553421,73.08728,FALSE,-12.0160049817586,-44.384724033335,"1"
1183.701294,67.836472,210.107025,419.331726,977.078064,279.323761,92.464203,313.418762,FALSE,10.5540250581272,10.4404432276435,"29"
20364.824219,138.896606,138.400177,2464.677246,2393.384033,-9.97328,128.590225,-224.219925,FALSE,-8.87920314326229,-44.9107779404102,"1"
40.383224,126.585938,142.632843,558.307007,731.804688,72.442223,64.336349,400.407837,FALSE,15.0814579050144,13.2015744258337,"29"
123.942917,104.242668,151.579514,331.170349,339.322388,247.935333,63.256226,56.213203,FALSE,13.3058876099499,21.6325456056664,"20"
1378.643921,53.143932,255.618988,106.839333,692.680115,712.321228,42.085724,9452.249023,TRUE,-29.3308530706257,-5.70512379468718,"25"
[truncated: 1,046,576+ more rows]
