# Supplementary material for: Selective loss of CD107a TIGIT+ memory HIV-1-specific CD8+ T cells in PLWH over a decade of ART
Source: eLife. 2023 Sep 19;12:e83737. doi: 10.7554/eLife.83737 (PMC10508883; doi:10.7554/eLife.83737)
Supplement: Figure 2—source data 2. [file elife-83737-fig2-data2.xlsx]

## Sheet: Clusters in total CD8
			Clusters with statistical differences between groups									Other clusters with no significant differences between groups
Patients	Group	Condition	C1	C2	C6	C7	C9	C10	C11	C12		C3	C4	C5	C8	C13	C14	C15	C16	C17	C18	C19	C20	C21	C22	C23	C24	C25	C26	C27	C28	C29	C30	C31	C32	C33	C34	C35	C36	C37	C38
EI1	Ei	CD8total	0.17	1.08	0.68	4.31	1.04	0.33	1.1	0.67		0.83	0.16	0.01	5.44	0.56	1.97	1.07	14.95	9.19	0.04	1.86	0.44	4.57	0.24	5.94	0.38	1.45	0.09	0.8	2.24	4.04	3.44	0.68	9.52	1.99	0.02	0	0.1	1.25	0.15
EI10	Ei	CD8total	1.58	0.9	1.38	13.82	2.2	1.36	0.75	1.5		1	7.48	0.04	1.47	1.97	4.5	0.03	0.01	0.07	0.29	1.37	1.06	3.21	11.6	5.27	0.11	0.84	0.21	0.16	2.1	11.96	5.55	0.24	6.69	1.89	0.03	11.95	0.1	1.93	5.93
EI11	Ei	CD8total	0.64	0.66	0.8	7.44	1.32	0.64	0.16	1.57		0.33	4.52	0.01	3.08	0.79	4.97	0.01	0.01	0.04	0.06	1.66	0.22	3.85	2.21	4.56	0.13	0.08	0.13	0.03	6.53	4.2	3.42	0.17	5.88	1.99	0.02	7.52	0.04	5.74	1.51
EI13	Ei	CD8total	0.08	1.17	1.3	6.44	2.32	1.12	2.65	3.61		0.65	0.48	0	5.65	2.2	11.8	0.03	0	0.01	0.03	2.33	0.32	6.47	2.14	7.31	0.1	0.01	0.06	0.02	4.37	5.89	3.63	0.23	10.38	2.89	0.02	0.85	0.05	8.84	0.02
EI16	Ei	CD8total	0.9	0.45	2.34	7.81	0.71	0.26	0.7	0.92		1.26	3.09	0.01	1.05	0.54	3.32	0.19	0	0.02	0.01	0.92	1.19	9.1	7.26	3.44	0.1	0.24	0.74	0.08	3.08	5.11	0.8	0.37	6.01	1.22	0.01	3.7	0.05	2.46	0.3
EI17	Ei	CD8total	1.12	0.67	3.16	6.99	2.49	1.47	1.31	10.17		1.28	3.19	3.44	0.59	2.72	11.94	0.12	0.01	0.03	0.01	0.37	1.44	4.84	7.41	3.12	0.19	0.39	0.78	0.13	1.72	2.86	0.62	2.05	3.22	1.25	0	2.78	0.01	6.98	0.29
EI18	Ei	CD8total	1.28	4.2	3.95	9.51	1.64	0.6	3.66	4.47		2.73	24.29	6.77	0.24	0.68	8.14	0	0.05	10.58	0.45	2.59	0.08	2.87	0.07	4.19	5.2	18.14	16.43	2.64	1.08	5.48	5.14	0.4	8.2	1.63	0.12	0.06	0.34	0.38	0.05
EI19	Ei	CD8total	1.24	1.04	2.26	2.62	0.62	0.16	0.3	1.08		0.61	19.14	4.28	0.64	0.6	5.76	0.06	0.58	7.17	0.6	1.65	0.07	9.42	0.15	4.65	1.24	8.34	3.74	0.91	2.92	14.19	4.41	0.41	9.81	1.21	0.01	0.05	0.6	0.63	0.06
EI2	Ei	CD8total	0.08	0.43	8.46	8.05	2.46	0.92	0.77	4.19		0.38	0.18	5.71	1.08	0.72	5.97	1.31	0.01	0.06	0.07	2.53	0.19	3.08	1.7	6.55	0.17	0.12	0.2	0.08	2.21	9.05	6.75	0.16	8.04	3.02	0.02	4.13	0.2	6.17	1.8
EI20	Ei	CD8total	0.91	3.51	3.1	4.8	3.55	1.14	0.78	5.46		2.47	2.43	2.56	1.85	1.51	9.49	0.13	0.01	0.08	0.04	1.03	0.22	8.4	3.43	4.56	0.03	0.16	0.16	0.04	2.67	6.27	1.97	0.23	6.54	2.11	0.02	7.44	0.49	8.26	4.15
EI21	Ei	CD8total	1.64	1.93	1.75	4.75	2.89	2.31	1.33	7.13		0.93	2.74	1.86	2.38	1.96	8.04	0.07	0.01	0.15	0.06	1.17	0.29	2.62	6.77	13.42	0.02	0.23	0.11	0.02	2.64	2.8	0.9	0.53	7.78	1.31	0.05	5.34	0.28	3.38	7.35
EI22	Ei	CD8total	0.2	1.46	0.85	2.28	2.57	1.09	2.43	4.18		0.83	2.57	1.56	1.2	3.92	17.58	0.05	0	0.04	0.04	0.25	1.51	12.68	2.23	7.28	0	0.03	0	0.01	13.33	3.8	0.59	0.2	5.62	1.66	0.01	0	0.06	4.26	0.04
EI23	Ei	CD8total	1.76	0.85	2.52	9.15	2.99	1.31	1.1	3.18		2.23	0.01	0.47	1.28	0.69	18.78	0.01	0	0.17	0.06	0.65	6.31	6.95	11.66	7.33	0	0.6	0.01	0.13	4.4	5.03	0.67	0.3	5.71	0.91	0	0.03	0.07	1.89	0.42
EI24	Ei	CD8total	0.61	1.66	2.32	4.62	3.17	1.23	1.96	11.24		0.99	0.67	0.63	0.49	3.39	13.7	0.02	0.04	3.13	0.11	1.42	0.39	7.28	0.4	8.57	3.58	10.8	3.46	1.87	5	2.24	1.12	0.19	10.28	2.6	0.01	0.03	0.22	0.56	0.09
EI3	Ei	CD8total	0.22	2.61	1.95	13.48	1.91	0.43	2.67	0.85		2.08	0.21	0.02	1.21	1.22	4.01	0.64	0.01	0.35	0.22	0.22	0.12	9.47	0.06	3.74	5.05	4.18	8.64	1.98	7.84	2.37	0.23	0.13	3.21	0.98	0.07	0.07	0.06	0.33	0.01
EI4	Ei	CD8total	0.33	2.6	1.31	10.89	2	0.84	2.61	9.86		4.72	1.37	0.01	0.89	4.62	9.24	0.22	0.01	0.03	0.06	2.48	0.09	7.66	0.86	2.55	2.02	0.08	2.52	0.01	3.38	19.1	8.85	0.16	8.64	1.67	0.07	6.14	0.04	4	1.35
EI5	Ei	CD8total	0.3	2.92	1.92	7.8	0.74	0.45	2.35	0.47		5.16	0.44	1.14	0.58	0.62	3.32	0.15	0.02	0.04	0.15	0.88	0.09	3.1	1	8.99	1.22	0.07	0.63	0.07	5.47	1.88	1	0.79	8.61	0.77	0.02	6.95	0.63	4.07	0.94
EI6	Ei	CD8total	1.54	2.55	5.77	14.47	1.14	0.18	1.87	2.06		1.86	2.61	2.47	1.19	6.78	10.91	0.18	0.02	0.68	0.09	0.69	0.18	4.34	0.05	5.89	9.1	9.56	10.14	3.81	2.74	5.13	1.99	0.26	5.13	2.43	0.13	0	0.03	0.35	0.02
EI7	Ei	CD8total	0.59	0.81	0.99	1.51	0.83	0.52	1.11	2.67		1.82	3.5	2.25	0.13	1.47	31.31	0.87	0.09	0.27	0.28	1.09	0.21	1.2	6.07	1.95	0.05	0.22	0.2	0.02	1.07	2.23	2.94	0.07	3.33	1.75	0.21	10.93	0.15	2.36	12.36
EI8	Ei	CD8total	0.08	1.38	1.27	3.13	4.5	2.58	2.79	4.06		0.81	0.53	0.42	2.03	1.46	13.47	0.81	0.02	3.65	0.03	0.36	0.12	5.6	0.05	1.95	13.47	16.05	23.27	4.33	0.78	1.86	0.57	0.39	2.96	0.8	0.02	0.1	0.09	0.87	0.02
EI9	Ei	CD8total	0.08	0.5	1.95	4.25	0.58	0.23	0.71	0.46		0.33	0.59	3.07	0.32	0.32	3.36	4.17	0.01	0.09	0.13	1.75	0.16	2.47	2.7	5.66	0.14	0.06	0.02	0	2.81	14.02	9.66	0.04	8.64	5.84	0	0.58	0.02	0.92	2.68
HC1	HC	CD8total	0.1	1.36	0.42	16.22	2.78	1.85	1.64	2.27		2.54	0.05	0.01	1.91	0.82	6.49	0.85	6.25	16.02	0.07	1.06	0.14	7.36	0.05	5.86	0.2	1.67	0.15	0.88	6.67	1.74	1.36	0.51	7.12	3.16	0.03	0	0.03	0.25	0.08
HC10	HC	CD8total	1.03	0.52	2.56	17.41	0.33	0.14	0.44	1.23		0.28	16.73	0.02	0.68	0.66	5.28	0.07	0	0	0.01	5.05	1.64	3.48	4.62	4	1.26	0.38	1.33	0.32	0.94	1.01	3.64	0.57	12.99	7.94	0	0.84	0.08	4.43	0.1
HC11	HC	CD8total	1.74	0.49	1.12	4.48	5.11	1.97	0.13	0.22		0.98	9.81	0.03	0.3	0.19	1.4	0.12	0.1	2.26	0.77	0.06	1.5	1.81	19.61	0.43	0.22	2.41	1.16	0.27	1.75	0.31	0.21	0.09	0.61	0.3	0.01	12.77	0.86	1.72	22.38
HC12	HC	CD8total	6.79	1.79	5.61	6.54	0.59	0.07	0.67	0.11		4.13	2.41	4.26	0.25	0.11	1.08	0.12	0	0.01	0.04	1.39	0.1	2.13	0.78	4.53	0.74	0.06	0.79	0.04	7.3	1.04	0.95	0.18	3.95	1.29	0.05	2.55	0.11	3.34	0.24
HC14	HC	CD8total	8.3	1.4	2.5	8.45	0.9	0.32	0.83	9.15		4.12	0.95	1.69	0.13	NA	23.21	0.06	0.01	0.12	0.05	0.29	3.5	7.81	20.18	3.81	0.01	0.39	0	0.07	8.43	2.81	0.39	0.23	4.02	0.69	0	0.32	0.2	4.73	1.94
HC15	HC	CD8total	1.59	4.16	4.61	4.42	0.89	0.11	0.94	0.84		10.82	9.14	5.38	0.33	0.43	4.88	0.04	0.02	0.27	0.08	0.06	0.77	5.58	13.68	1.19	0.06	0.91	0.46	0.06	7.58	1.01	0.14	0.15	1.14	0.18	0.05	11.1	0.05	2.8	9.9
HC16	HC	CD8total	1.76	3.24	5.89	12.99	0.38	0.08	0.61	0.32		2.28	6.76	5.63	0.15	0.67	5.8	0.03	0	0.01	0.07	0.43	0.36	3.22	1.58	3.74	0.13	0.08	0.38	0.06	3.48	1.5	0.58	0.27	1.75	0.43	0.17	2.51	0.13	3	0.12
HC17	HC	CD8total	2.9	0.49	5.21	7.44	1.14	0.28	0.44	4.61		1.42	7.66	3.36	0.26	1.37	24.71	0.11	0.04	1	0.41	1.73	0.98	2.84	13.31	4.26	0.11	1.23	0.49	0.15	1.59	1.06	0.66	0.28	7.14	1.22	0.01	10.22	0.01	4.18	15.65
HC18	HC	CD8total	2.28	1.33	9.17	9.02	2.3	0.39	0.33	0.08		1.4	13.35	2.99	0.16	0.07	1.57	0.07	0.02	0.09	0.09	0.53	2.8	6.02	9.78	6.56	0.46	1.56	0.81	0.26	2.44	1.24	0.33	0.12	4.48	0.67	0.03	2.08	0.01	5.74	1.17
HC19	HC	CD8total	2.4	0.53	3.6	3.9	0.68	0.17	0.26	0.5		0.22	5.59	4.05	0.37	0.24	2.6	0.15	0	0.09	0.04	0.11	0.59	3.81	4.84	2.22	0.02	0.31	0.24	0.15	1.21	1.52	0.33	1.01	2.07	0.68	0	12.74	0.11	15.65	2.58
HC2	HC	CD8total	1.94	0.87	7.62	10.31	1.09	0.25	2.96	1.03		1.31	19.15	4	0.13	0.62	8.85	0.1	0.01	0.01	0.18	1.53	0.58	5.57	4.71	8.95	0.23	0.19	0.9	0.1	1.74	2.1	1.81	0.46	7.15	1.6	0.02	5.54	0.1	8.2	0.31
HC20	HC	CD8total	0.33	2.52	4.77	14.91	0.58	0.19	0.68	0.26		4.07	0.85	1.72	0.18	0.07	1.67	0.25	0.02	0.01	0.11	0.03	0.62	7.9	4	0.77	0.41	0.22	1.38	0.11	3.21	0.4	0.05	0.33	0.73	0.15	0	5.64	0.04	7.29	0.39
HC24	HC	CD8total	2.82	1.76	1.35	6.9	0.36	0.23	0.21	0.26		2.64	19.19	0.02	0.04	0.14	0.93	0.13	0.01	1.52	0.16	1.47	0.07	7.46	0.03	4.75	10.44	4.04	8.12	3.6	8.16	4.1	2.52	0.17	7.62	0.71	0.11	0.02	0.08	0.38	0
HC3	HC	CD8total	0.14	1.1	1.18	10.68	0.57	0.03	1.07	1.72		2.57	0.88	0.01	0.28	2.29	5.03	0.79	0	0.01	0	1.22	0.57	2.79	3.82	14.57	1.96	0.15	0.6	0.09	2.87	0.78	0.53	0.24	5.85	0.31	0.01	0.84	0.03	2.66	0.12
HC4	HC	CD8total	0.74	0.51	5.92	16.21	1.53	0.38	0.86	7.15		0.92	8.7	3.13	0.07	4.07	13.85	0.04	0.04	2.47	0.07	2.26	0.05	4.39	0.04	5.86	4.93	5.92	9.81	1.36	1.27	4.27	3.45	0.19	14.17	10.6	0.01	0.22	0.09	0.35	0.12
HC5	HC	CD8total	0.24	2.35	7.29	10.85	1.5	0.35	3.62	1.94		1.33	1.34	7.9	4.14	4.82	5.48	0.54	0.01	10.44	0.17	0.03	0.52	3.23	0.27	0.64	9.92	34.64	9.38	6.98	2.63	0.54	0.1	0.08	0.69	0.32	0.01	0.04	0.07	0.17	0.06
HC6	HC	CD8total	0.28	2.58	2.38	5.54	13.29	4.65	2.5	8.46		5.38	0.54	0.51	0.02	0.66	7.05	0.05	0.01	0.32	0.56	0.17	0.16	5.14	0.01	2.31	16.98	11.25	6.31	11.46	8.7	1.22	0.1	0.15	1.92	0.15	0.02	0	0.09	0.14	0.01
HC7	HC	CD8total	0.79	1.58	2.48	7.01	0.25	0.12	1.71	0.46		1.25	0.95	2.54	3.37	0.74	1.22	0.13	0.03	0.18	0.56	1.41	0.13	5.9	0.38	11.8	0.05	0.13	0.08	0	2.53	2.84	1.25	0.05	10.27	5.67	0	0.89	0.1	1.76	1.66
HC8	HC	CD8total	1.94	1.72	3.65	6.43	1.35	0.28	0.75	1.03		1.22	21.96	3.28	0.15	0.27	1.89	0.07	0.01	0	0.16	1.29	0.64	8.25	3.39	2.41	0.56	0.27	2.19	0.15	1.4	5.53	1.29	0.49	5.48	1.06	0.01	12.22	0.01	6.69	0.35
HC9	HC	CD8total	4.01	4.38	12.4	17.26	0.31	0.06	0.81	0.14		7.57	11.93	6.62	0.2	0.19	2.45	0.12	0	0.03	0.05	0.16	1.18	5.13	8.34	1.48	0.23	0.22	0.3	0.07	8.34	2.42	0.3	0.45	1.64	0.42	0.01	2.07	0.54	5.61	0.25
S1	S1	CD8total	0.55	0.79	0.73	11.36	4.62	2.22	1.02	4.91		0.64	0.22	0	0.35	3.25	9.29	2.56	0.03	6.23	0.17	0.85	0.48	5.55	0.06	4.04	5.72	13.81	18.69	1.84	2.67	3.42	0.89	0.82	7.05	0.82	0.04	0.06	0.12	0.53	0.02
S10	S1	CD8total	0.26	1.8	1.52	10.59	1.16	0.38	1.83	0.99		3.67	0.12	0.01	1.77	1.01	4.27	0.51	0.01	3.26	0.14	1.69	0.23	4.85	0.05	4.22	6.67	13.16	8.41	3.53	2.93	3.06	2.56	0.52	6.93	3.53	0.04	0.02	0.32	0.38	0.03
S12	S1	CD8total	0.08	1	0.53	3.97	4.97	4.53	4.13	11.22		4.17	0.07	0.01	1.71	1.69	5.53	0.64	0.04	7.14	0.32	0.18	0.15	7.09	0.07	3.5	1.55	11.17	5.66	2.37	9.05	1.38	0.33	0.04	3.28	1.59	0.01	0.01	0.35	0.19	0.07
S13	S1	CD8total	0.85	0.86	0.38	2.63	2.83	1.53	1.96	5.48		2.6	6.6	0	0.33	1.73	9.17	0.18	0	11.25	0.05	0.07	0.05	3.25	0.04	2.01	1.62	9.63	4.73	1.19	5.54	0.44	0.78	0.05	2.86	6.43	0	0	0.39	0.02	0
S16	S1	CD8total	0.53	1.24	6.89	17.21	0.61	0.17	1.61	1.79		2.1	15.06	1.37	0.09	1.4	11.62	0.06	0.02	0.91	0.4	0.41	2.07	3.75	17.66	2.58	0.03	2.01	0.24	0.15	0.84	0.94	1.68	0.6	3.7	3.2	0.05	6.08	0	7.73	12.79
S19	S1	CD8total	0.66	0.79	2.62	3.8	3.68	0.76	1.44	2.34		1.57	11.74	2.08	0.26	0.43	11.3	0.46	0.59	21.62	0.02	0.32	0.3	2.89	0.11	5.7	0.2	3.81	0.19	0.95	6.9	0.94	0.3	1.22	4.01	1.36	0.02	0	0.05	0.24	0.04
S2	S1	CD8total	0.38	1.63	4.66	7.41	2.56	0.46	1.54	6.03		2.28	0.94	2.03	0.1	2.62	10.3	0.32	0.39	16.57	0.07	0.17	0.16	2.97	0.02	7.85	0.1	3.71	0.04	1.44	7.51	0.48	0.12	0.85	3.37	0.88	0.01	0	0.71	0.08	0.02
S20	S1	CD8total	0.58	0.89	1.85	5.07	1.75	0.67	1.22	2.64		1.32	6.83	3.14	0.31	0.84	13.2	0.04	0	0.23	0.09	0.45	0.52	5.54	6.41	7.02	0.06	0.54	0.73	0.2	5.64	3.48	0.89	0.16	4.5	0.9	0.02	10.02	0.01	7	3.87
S21	S1	CD8total	1.27	2.85	1.68	5.23	8.48	2.95	0.9	16.72		4.32	1.44	0.94	1.41	2.11	8.75	0.1	0.32	0.16	0.24	0.08	0.4	7.93	2.95	4.18	0.24	0.4	1.17	0.29	11.89	0.51	0.08	0.05	1.12	0.05	0	2.71	0.03	3.14	0.61
S22	S1	CD8total	0.97	1.01	1.73	5.87	5.6	2.35	3.1	2.58		0.84	7.83	0.33	0.7	1.5	8.85	0.06	0.01	0.12	0.1	3.37	0.28	3.82	2.42	4.88	0.14	0.25	0.7	0.1	2.26	2.75	5.87	1.04	9.94	6.69	0.03	12.11	0.04	5.36	0.96
S23	S1	CD8total	0	0.52	0.98	7.02	0.67	0.16	1.81	0.66		0.86	0.34	0.01	3.44	0.68	1.79	0.34	0	0.04	0.12	0.79	0.75	7.28	3.36	3.89	0.23	0.43	1.67	0.13	4.81	2.28	0.48	0.12	5.33	0.71	0.01	2.78	0.01	2.83	0.2
S24	S1	CD8total	0.22	0.42	0.69	6.88	4.94	2.56	1.05	6.04		0.82	0.35	0	1.97	1.98	11.38	0.07	0	0.02	0.46	0.34	0.27	6.28	0.91	3.51	0.36	0.21	0.84	0.11	4.23	1.43	0.25	0.14	3.05	0.66	0	1.14	0	2.85	0
S3	S1	CD8total	0.08	0.47	0.34	2.75	10.84	3.1	1.07	6.88		1.14	0.23	0.09	5.48	4.04	5.08	0.91	0	0	0.13	0.72	0.39	8.33	1.51	7.02	0.26	0.59	0.79	0.2	5.9	3.61	0.59	0.46	8.13	1.11	0	2.56	0.07	4.52	0.13
S5	S1	CD8total	0.15	0.71	1.37	3.29	0.47	0.11	0.78	0.35		0.32	1.48	0.01	0.09	0.34	1.7	0.5	0	0.06	0.06	1.73	0.92	5.54	5.38	4.94	0.52	0.85	2.21	0.14	0.93	3.04	2.12	0.43	7.68	1.52	0	4.77	0.05	8.07	0.61
S6	S1	CD8total	NA	NA	NA	NA	NA	NA	NA	NA		NA	NA	NA	NA	NA	NA	NA	NA	NA	NA	NA	NA	NA	NA	NA	NA	NA	NA	NA	NA	NA	NA	NA	NA	NA	NA	NA	NA	NA	NA
S7	S1	CD8total	1.08	0.37	2.53	5.36	0.79	0.17	0.77	2.1		0.8	4.55	2.96	0.5	3.21	8.7	0.19	0.01	7.63	0.37	0.26	0.29	5.27	0.26	2.3	7.45	26.58	15.55	3.18	5.12	1.69	0.2	0.33	3.19	0.46	0.03	0.05	0.37	0.21	0.08
S8	S1	CD8total	0.04	0.63	10.44	12.17	1.6	0.56	1.96	3.02		1.36	0.17	5.81	2.3	1.1	3.7	0.4	0.03	13.31	0.17	0.07	0.16	5.15	0.09	1.15	8.61	26.99	15.81	3.49	4.86	0.89	0.05	0.37	1.33	0.07	0.01	0.05	0.37	0.1	0.04
S9	S1	CD8total	1.33	2.03	3.03	6.66	1.96	0.49	1.27	3.69		1.96	6.31	2.03	0.66	0.64	9.84	0.41	0	0.09	0.08	0.51	0.85	3.67	18.72	6.97	0.05	0.43	0.28	0.08	3.68	1.51	0.29	0.11	4.61	0.41	0.04	6.77	0.09	4.29	6.11
S1	S2	CD8total	0.22	0.64	0.24	15.97	6.32	2.43	1.07	4.93		1.03	0.21	0	2.65	2.94	11.06	1.59	0.01	0.15	0.03	0.24	0.88	7.78	18.11	4.27	0.1	0.57	0.24	0.07	2.16	1.73	0.13	0.42	3.29	0.16	0.02	6.89	0.07	5.43	8.39
S10	S2	CD8total	0.07	2.77	0.92	7.4	3.18	2.59	2.15	6.59		4.28	0.12	0	6.56	0.99	4.39	0.69	0	0.44	0.03	0.1	1.01	5.5	7.91	3.49	0	0.7	0.07	0.13	8.18	0.67	0.17	0.17	1.24	0.84	0	1.91	0	2.65	5.66
S11	S2	CD8total	0.64	0.17	0.61	4.29	3.04	2.16	0.22	6.1		0.14	5.37	0	2.24	0.64	4.77	0.36	0.01	0.56	0.03	0.1	1.19	3.22	13.27	1.89	0.09	1.18	0.24	0.11	8.24	0.38	0.21	0.15	0.77	1.01	0.03	3.87	0.04	3.53	7.1
S12	S2	CD8total	0.03	0.31	0.43	3.41	2.43	1.29	1.52	3.22		5.14	0.02	0	1.16	0.93	6.97	0.41	0.01	0.02	0.04	2.84	0.75	4.97	3.63	8.31	0.05	0.25	0.23	0.04	2.42	5.36	4.32	0.42	12.95	5.26	0	1.02	0.01	5.46	0.13
S13	S2	CD8total	1.65	0.61	12.48	37.2	0.98	0.07	1.09	1.14		3.09	6.89	1.12	0.35	0.86	7.83	0.13	0	0.01	0.01	1.9	0.35	6.39	3.16	7.67	0.08	0.17	0.45	0.02	1.91	4.69	4.43	0.59	12.18	5.83	0	2.19	0.01	7.19	0.21
S14	S2	CD8total	0.94	0.33	3.72	6.46	3.1	0.65	0.42	1.7		0.64	8.7	2.21	1.78	0.29	6.78	0.16	0.17	1.55	0.17	0.43	0.17	2.15	0	5.68	6.11	16.09	3.87	9.29	1.81	0.52	1.2	0.17	5.16	4.73	0.09	0	0	0.17	0
S16	S2	CD8total	0.77	1.11	9.58	8.83	1.95	0.3	1.53	0.63		3.3	4.42	4.14	0.05	0.27	2.67	0.09	0.02	0.94	0.54	0.78	0.3	3.86	0.07	11.4	5.81	12.07	2.72	6.11	2.63	0.8	2.02	0.58	6.87	4.56	0.02	0.01	0.25	0.2	0
S19	S2	CD8total	0.42	0.58	1.95	4.05	1.44	1.45	0.55	11.82		0.31	17.36	1.25	0.35	2.09	16.79	0.45	0	0.17	0	0.42	14.85	6.75	16.09	6.74	0.05	0.98	0	0.33	4.75	1.87	0.97	0.18	6.19	4.52	0.02	0.02	0.1	0.98	0.32
S2	S2	CD8total	0.25	1.47	4.57	9.02	1.11	1.06	0.82	1.91		2.4	0.31	3.54	0.06	0.41	4.36	0.31	0.01	0.23	0.03	0.14	16.2	6.18	23.65	5.42	0.03	1.23	0	0.41	3.93	0.76	0.34	0.24	2.48	1.23	0	0.05	0.09	1.39	0.94
S20	S2	CD8total	1.06	1.5	2.6	6.92	1.64	0.5	0.53	3.5		1.01	8.15	0.63	0.51	1.16	14.79	0.14	0	2.52	0.07	2.3	0.15	2.92	0.08	4.37	3.52	10.33	3.46	2.61	3.2	2.56	4.47	0.25	6.93	7.9	0.03	0.01	0.23	0.22	0.02
S21	S2	CD8total	1.25	1.22	0.68	7.86	0.22	0.09	0.83	0.32		3.08	4.26	0.01	1.12	0.39	1.7	0.19	0	0.6	0.05	4.95	0.11	2.19	0.02	4.13	5.1	7.83	2.77	4.27	1.62	1.88	8.83	0.25	8.94	15.48	0.05	0.01	0.28	0.15	0.01
S22	S2	CD8total	1.51	0.89	0.78	5.42	5.33	5.12	2.59	4.35		0.84	8.85	0	0.87	3.93	8	0.06	0.02	0.47	0.91	1.17	1.25	3.06	11.81	6.98	0.03	1.32	0.12	0.19	3.85	1.28	0.71	0.07	6.78	1.08	0.3	1.84	0	2.75	5.22
S23	S2	CD8total	0.21	0.37	0.97	8.5	8.2	1.21	0.73	4.75		0.72	0.34	0.01	1.11	1	8.9	0.42	0.02	1.28	0.39	1.06	0.43	3.19	0.18	2.66	15.93	18.5	25.73	7.62	0.81	4.42	0.99	0.21	4.01	0.42	0.04	0.06	0.04	0.32	0.03
S24	S2	CD8total	0.39	0.45	1.16	4.51	0.36	0.05	0.48	0.39		0.73	0.86	0.01	0.33	0.38	2.14	0.05	0.01	1.24	0.22	0.43	0.45	1.14	0.09	2.15	23.22	24.12	15.65	15.41	0.65	0.86	0.39	0.38	1.84	0.23	0.01	0.03	0.06	0.21	0.01
S3	S2	CD8total	0.04	0.25	2.36	4.75	0.63	0.17	0.49	1.36		0.33	0.18	2.8	7.28	2.57	11.88	0.31	0.01	0.16	0.05	5.58	0.23	2.39	2.53	6.36	0.09	0.28	0.72	0.05	2.26	2.25	4.6	0.64	8.64	1.71	0.02	16.8	0.19	6.77	3.6
S4	S2	CD8total	0.35	0.24	13.93	15.08	1.01	0.29	0.49	1.42		0.41	4.41	7.42	1.03	1.31	4	0.05	0.01	0.06	0.1	4.66	0.2	4.48	2.06	7.47	0.1	0.24	0.74	0.1	2.57	2.96	2.86	0.51	8.06	1.24	0.03	13.41	0.1	8.68	2.39
S5	S2	CD8total	0.14	0.36	2.43	5.44	3.82	1.69	0.42	1.6		0.2	0.8	3.24	0.03	2.01	3.52	0.26	0.01	1.34	0.41	5.17	0.1	2.21	0.06	15.23	1.85	6.28	2.14	1.53	4.55	2.26	4.22	0.26	14.99	5.67	0.79	0.02	0.12	0.15	0.01
S6	S2	CD8total	NA	NA	NA	NA	NA	NA	NA	NA		NA	NA	NA	NA	NA	NA	NA	NA	NA	NA	NA	NA	NA	NA	NA	NA	NA	NA	NA	NA	NA	NA	NA	NA	NA	NA	NA	NA	NA	NA
S7	S2	CD8total	1.14	1.02	5.93	19.39	1.54	0.48	1.14	4.41		1.29	5.32	1.01	0.29	1.54	13.35	0.25	0	1.65	0.41	5.44	0.07	3.11	0.05	12.29	3.25	7	3.09	2.55	2.59	1.66	6.14	0.19	15.08	8.82	0.07	0.04	0.14	0.11	0.01
S8	S2	CD8total	0.04	0.57	5.05	9.18	1.85	1.09	1.77	1.24		0.53	0.15	2.15	4.12	0.25	2.2	0.35	0	0.03	0.03	2.22	0.42	5.47	2.97	3.05	0.87	0.1	0.56	0.15	3.35	3.76	2.43	0.2	5.5	2.29	0.02	5.37	0.15	7.65	1.03
S9	S2	CD8total	2.33	3.15	2.01	3.84	2.91	1.06	1	7.5		2.06	4.26	1	0.28	1.35	22.12	0.3	0	0.02	0.06	1.48	0.4	6.76	2.52	3.23	0.59	0.09	0.34	0.12	2.93	3.26	1.24	0.26	5.07	1.5	0.04	2.47	0.31	8.75	0.72
