# Supplementary material for: Selective loss of CD107a TIGIT+ memory HIV-1-specific CD8+ T cells in PLWH over a decade of ART
Source: eLife. 2023 Sep 19;12:e83737. doi: 10.7554/eLife.83737 (PMC10508883; doi:10.7554/eLife.83737)
Supplement: Figure 3—source data 1. [file elife-83737-fig3-data1.xlsx]

## Sheet: Single cell data figure 3
fcs_file,"CD45RA BV785","CD39 FITC","LAG3 PE","CCR7 PECF594","CD27 BV605","PD1 BV421","TIM3 A647","TIGIT","CD107a PECY5","IL2 BV650","IFN BV711","sample","tSNE_V1","tSNE_V2","louvain"
export_AJP SEB_A5_A05_CD8 _2020-06-15,1250.553223,125.714027,365.305573,176.823792,103.692619,1228.391479,304.364929,2463.461914,2159.477051,1620.785156,8101.869141,FALSE,-29.2442824432551,-9.45773042477395,"7"
export_AJP SEB_A5_A05_CD8 _2020-06-15,1408.20874,133.843643,-112.549835,229.422073,511.412018,81.858147,-365.260223,13240.712891,8282.235352,107.893517,362.688385,TRUE,-31.1451844942007,6.64078910697597,"1"
export_AJP SEB_A5_A05_CD8 _2020-06-15,429.759766,122.831512,302.629272,292.291382,45.657585,668.009705,101.089203,6078.875,974.88446,139.083298,2081.377686,FALSE,-7.79790382108282,-19.1470918221064,"16"
export_AJP SEB_A5_A05_CD8 _2020-06-15,1173.709351,74.597672,180.563156,136.366333,155.461975,1005.36731,-32.141003,2031.008789,921.104675,254.365997,7506.887207,FALSE,-11.5144511917311,-4.19546696039673,"14"
export_AJP SEB_A5_A05_CD8 _2020-06-15,2461.775879,82.853615,233.534653,271.361542,1332.091797,117.074821,-7.988693,187.6371,786.503174,269.59964,-28.526802,FALSE,22.9411427982961,8.02872784506082,"18"
export_AJP SEB_A5_A05_CD8 _2020-06-15,99.895714,150.977081,114.565094,158.14769,1265.251709,810.092285,-53.063984,2005.817993,1176.685059,375.477539,169.144882,FALSE,-0.917658982852479,-28.2487262611014,"16"
export_AJP SEB_A5_A05_CD8 _2020-06-15,19087.566406,138.783691,225.376511,2844.116943,1944.916626,-99.729523,27.468214,915.823364,66.087364,886.059753,156.234604,TRUE,30.3831267362363,35.3015443653621,"5"
export_AJP SEB_A5_A05_CD8 _2020-06-15,227.186111,192.587738,1120.594604,411.774353,1548.796265,1284.362061,-11.607861,21148.808594,1105.746582,327.329681,281.939178,TRUE,-29.2129564668741,-26.6957219958114,"2"
export_AJP SEB_A5_A05_CD8 _2020-06-15,219.417084,108.822594,393.023529,72.780334,185.961044,296.397491,-20.043022,639.804871,88.937302,1419.661987,208.23732,FALSE,2.54199780737586,-16.7152801242354,"25"
export_AJP SEB_A5_A05_CD8 _2020-06-15,704.732361,141.09494,751.221924,105.883286,182.309952,1610.975342,-27.04693,2953.675293,84.060364,534.556335,8291.800781,FALSE,-19.3194243585491,-23.3252894710124,"24"
export_AJP SEB_A5_A05_CD8 _2020-06-15,619.759338,72.3657,1129.086182,164.344131,1473.636719,147.525131,137.260147,5654.216309,828.601624,1112.770996,367.597992,FALSE,5.40777633243557,-15.2529105110401,"11"
export_AJP SEB_A5_A05_CD8 _2020-06-15,5388.854004,121.614571,-38.735477,765.404541,1215.939453,294.185608,-382.408356,-562.338013,5839.624023,2536.441162,155.737442,FALSE,15.7763039882737,16.0581943717369,"4"
export_AJP SEB_A5_A05_CD8 _2020-06-15,23064.490234,113.245872,243.0923,994.727844,1255.954102,3.279002,126.139061,-42.761162,165.754868,1055.418335,126.835876,FALSE,29.4342335349273,35.593870529117,"5"
export_AJP SEB_A5_A05_CD8 _2020-06-15,8384.514648,85.627632,169.086014,973.424072,1122.30603,143.901459,39.103848,414.282959,29.300018,316.76355,849.221436,FALSE,30.6051181176454,27.1971330971779,"23"
export_AJP SEB_A5_A05_CD8 _2020-06-15,-514.332703,78.918137,292.425171,137.173691,720.925415,2183.182373,51.323235,7341.858887,557.223083,330.203583,524.233215,FALSE,-18.6674384648923,-35.1005522391914,"24"
export_AJP SEB_A5_A05_CD8 _2020-06-15,379.294556,213.203033,4575.179688,810.054321,311.941345,2252.658936,-61.383518,18132.15625,2981.262939,2784.446533,146.586823,FALSE,-25.6942335154252,-30.2230398639668,"24"
export_AJP SEB_A5_A05_CD8 _2020-06-15,41.403999,97.212181,507.311646,10.882962,1269.426514,1456.977661,-37.567528,21983.636719,562.221985,370.959015,582.660522,FALSE,-26.2696660222027,-27.0603286631181,"2"
export_AJP SEB_A5_A05_CD8 _2020-06-15,281.049713,210.651764,221.002457,311.042114,919.206421,212.196121,28.013025,-45.137238,737.489014,355.667053,159.903549,FALSE,8.23179408158713,-13.1054668988632,"11"
export_AJP SEB_A5_A05_CD8 _2020-06-15,477.230652,96.117714,400.839508,124.915619,258.823456,281.649902,0.964659,812.033936,44.701244,60.071072,2940.42627,FALSE,1.02523077743707,-0.927722562402117,"9"
export_AJP SEB_A5_A05_CD8 _2020-06-15,14.258512,17.975647,382.256775,198.698792,-39.911392,1083.316162,-61.726318,4755.085449,1441.436646,506.049927,230.045364,FALSE,-7.51336815527322,-24.7128212051728,"16"
export_AJP SEB_A5_A05_CD8 _2020-06-15,82.323517,162.617722,441.461761,231.097412,597.333374,998.047058,42.730747,5694.087402,1580.919067,598.970276,398.660858,FALSE,-5.61961940202773,-28.6759760747686,"16"
export_AJP SEB_A5_A05_CD8 _2020-06-15,246.444077,151.483353,421.984283,411.30777,159.462952,513.647217,-28.242102,4922.297852,239.106598,486.375275,4538.822754,FALSE,-5.50043812610456,-14.0659336557878,"16"
export_AJP SEB_A5_A05_CD8 _2020-06-15,156.853683,116.835457,136.709396,78.573143,368.146088,60.146233,32.559963,140.399261,194.34465,901.702332,432.841522,FALSE,5.89382578708132,-9.44683447213383,"9"
export_AJP SEB_A5_A05_CD8 _2020-06-15,1488.232666,177.934067,150.927979,167.544006,212.463043,326.716919,32.876892,393.624908,-47.998955,918.611938,400.292694,FALSE,12.1386027206999,1.42329123259577,"9"
export_AJP SEB_A5_A05_CD8 _2020-06-15,423.068268,229.959671,219.196777,224.284607,-34.375965,1185.298706,3.988853,3549.159668,85.000755,439.652588,2694.018066,FALSE,-9.27084378820013,-25.8398278733274,"16"
export_AJP SEB_A5_A05_CD8 _2020-06-15,5108.259277,34.422604,30.424273,33.566715,84.746094,471.849426,-4.590358,186.04277,28.438147,972.831055,495.663727,FALSE,22.7336692738366,17.6014724184928,"15"
export_AJP SEB_A5_A05_CD8 _2020-06-15,1495.10144,155.506027,1774.432251,413.178528,986.852417,406.121613,8.916801,4109.541992,492.086182,6878.277344,40488.640625,FALSE,-8.45700458677665,50.5938698980263,"22"
export_AJP SEB_A5_A05_CD8 _2020-06-15,-41.0322,134.94426,358.71283,30.552832,294.488983,26.919754,149.594559,10333.416016,8.322124,1111.761597,446.898682,FALSE,-8.54284610684253,-9.91790060250004,"6"
export_AJP SEB_A5_A05_CD8 _2020-06-15,-190.144562,35.017651,192.030121,83.841148,406.528748,277.147491,67.984825,2501.764893,-0.023521,5338.687012,89.792221,FALSE,7.69173257426211,-26.005479709968,"25"
export_AJP SEB_A5_A05_CD8 _2020-06-15,7617.878906,175.456467,402.835693,692.895691,1149.702271,160.782822,60.340374,357.801331,87.967262,665.655762,975.532959,FALSE,29.7411877294059,24.9571136196724,"23"
export_AJP SEB_A5_A05_CD8 _2020-06-15,37.504047,90.096329,323.136536,751.137817,166.429291,305.003967,80.07267,764.916565,1553.642212,271.104675,101.554405,FALSE,3.92341925825979,-12.656173293495,"9"
export_AJP SEB_A5_A05_CD8 _2020-06-15,-38.622654,168.128616,1231.57373,638.858337,1012.672363,113.45076,225.864975,218.617981,1186.999512,-12.871859,284.035675,TRUE,11.6981100599116,-4.89276118700593,"11"
export_AJP SEB_A5_A05_CD8 _2020-06-15,534.656067,329.970581,1496.806396,157.999969,556.472961,1645.616943,84.949883,8887.426758,559.622803,2198.937744,159.060577,FALSE,-15.3597010634141,-32.4413034537088,"24"
export_AJP SEB_A5_A05_CD8 _2020-06-15,9835.40918,34.005531,212.234756,138.268311,138.98175,135.727295,36.914944,-133.694382,101.979141,1462.399048,1648.837524,FALSE,27.3498843878587,29.4177444890026,"5"
export_AJP SEB_A5_A05_CD8 _2020-06-15,-86.691734,191.79924,2437.803223,870.448914,1036.698486,466.72522,-186.682129,34179.207031,3909.364502,436.833954,637.235718,FALSE,-32.3992137578129,-19.8277669362879,"3"
export_AJP SEB_A5_A05_CD8 _2020-06-15,148.626144,178.928604,465.183319,221.153671,527.61969,326.00473,141.773834,12975.060547,408.932831,689.930359,12457.306641,FALSE,-11.4143350581333,25.4598379451608,"10"
export_AJP SEB_A5_A05_CD8 _2020-06-15,93.843193,110.021133,265.097137,94.2584,581.408264,602.569763,-39.027653,-35.320789,199.713669,338.214386,714.806885,FALSE,0.0662960810191489,-21.7900885830068,"16"
export_AJP SEB_A5_A05_CD8 _2020-06-15,373.186432,126.065506,993.357727,202.321564,414.647552,359.962097,-134.935928,529.290894,703.975464,7932.626465,1.918654,FALSE,11.3384449299002,-25.9601760640545,"25"
export_AJP SEB_A5_A05_CD8 _2020-06-15,3227.540527,59.446404,476.848267,82.83139,58.417152,123.449593,-21.809353,6037.900879,607.265442,407.897369,146.438248,FALSE,16.0283786616357,13.7785861996252,"15"
export_AJP SEB_A5_A05_CD8 _2020-06-15,545.424683,166.541641,476.083984,226.378296,950.481873,389.287048,30.826708,4602.077637,125.690636,1378.188599,3508.821533,FALSE,-2.06731400832871,-15.6211219599458,"11"
export_AJP SEB_A5_A05_CD8 _2020-06-15,56.375042,115.49575,329.533539,353.52713,1157.11377,238.104034,-90.58461,5402.024902,219.680695,486.708832,733.344971,FALSE,0.976188202499381,-19.328514297846,"11"
export_AJP SEB_A5_A05_CD8 _2020-06-15,412.847595,197.379745,833.983948,568.874939,633.999146,343.809479,60.162861,-144.684296,688.552307,2537.087158,435.88736,FALSE,6.22515155930146,-17.8933884556859,"25"
export_AJP SEB_A5_A05_CD8 _2020-06-15,458.347046,106.272171,249.976303,280.824249,1009.171387,129.705872,3.99455,262.368286,899.152283,117.617088,79.179253,FALSE,10.8080884751425,-9.08750448992069,"11"
export_AJP SEB_A5_A05_CD8 _2020-06-15,164.259186,167.006393,1039.417603,79.3134,13.507911,454.984344,-26.61895,2078.735596,145.226379,118.531784,1336.221069,FALSE,-3.18920421367129,-14.2395569890885,"16"
export_AJP SEB_A5_A05_CD8 _2020-06-15,877.306763,194.967178,688.936218,259.064575,689.624817,1125.159302,103.565163,867.904114,592.927368,295.490204,177.160751,FALSE,-6.28472849993063,-29.2409667248693,"16"
export_AJP SEB_A5_A05_CD8 _2020-06-15,870.729553,248.178482,483.703735,281.575256,154.414459,658.739075,24.076162,1293.95874,-37.924225,805.277405,706.116516,FALSE,-2.56471687278248,-18.0804633397265,"16"
export_AJP SEB_A5_A05_CD8 _2020-06-15,-394.700867,136.50444,460.025482,201.935379,256.512787,513.568909,58.812752,2013.200317,495.843353,1027.38208,17350.021484,TRUE,-7.64366722481419,38.3904242204021,"14"
export_AJP SEB_A5_A05_CD8 _2020-06-15,114.619202,163.440735,228.809021,137.385635,379.047394,474.745148,4.323683,-318.114838,113.622231,468.114807,759.96875,FALSE,1.36646940585217,-19.0830002098994,"16"
export_AJP SEB_A5_A05_CD8 _2020-06-15,6837.922363,190.317841,328.350342,189.78981,68.663025,-4.608873,27.525518,20363.294922,77.994354,1065.897217,169.836151,FALSE,19.4012556924115,25.7472196128515,"15"
export_AJP SEB_A5_A05_CD8 _2020-06-15,871.584717,183.470612,469.276947,264.899261,169.050903,734.690857,48.274109,5528.937012,1488.000122,-15.744733,1108.95166,FALSE,-6.8356659679218,-20.0853385231227,"16"
export_AJP SEB_A5_A05_CD8 _2020-06-15,1273.374756,295.511353,375.385437,176.753357,110.466141,364.803558,79.766487,1794.386841,43.729206,954.470032,27.799431,FALSE,5.8556071058996,-2.70205814327494,"16"
export_AJP SEB_A5_A05_CD8 _2020-06-15,-1085.12085,122.304199,1957.158447,97.95192,1243.791504,1171.699829,30.122087,2804.315186,1836.168701,1244.307861,13520.546875,FALSE,-11.5301238076057,13.4285027344711,"14"
export_AJP SEB_A5_A05_CD8 _2020-06-15,-431.195465,203.747131,1365.220215,126.466187,333.306274,35.127396,9.436855,4299.708496,2721.297119,427.410126,11235.80957,FALSE,-4.0750581299376,31.6890360249005,"14"
export_AJP SEB_A5_A05_CD8 _2020-06-15,17008.3125,116.830505,855.402344,128.579666,2851.161621,356.671997,-122.54924,165.511963,1.227248,1362.36499,123.461662,FALSE,31.4401553675529,33.4208463605115,"5"
export_AJP SEB_A5_A05_CD8 _2020-06-15,-1076.598022,253.245575,23.3267,-7.977238,46.074192,234.148605,19.795462,129.294617,4470.266602,-87.959808,-153.201874,TRUE,-6.82464025258246,4.3073148446312,"8"
export_AJP SEB_A5_A05_CD8 _2020-06-15,-1045.32373,141.201035,58.528381,-42.278404,501.107788,678.844788,-54.395855,2152.208252,2276.690186,195.782196,772.654236,FALSE,-3.78097915505625,-19.4191480976953,"16"
export_AJP SEB_A5_A05_CD8 _2020-06-15,7494.094238,333.490295,169.119614,1215.127197,1825.866699,107.410515,-83.140045,-750.52771,4026.014648,228.720932,-32.71516,FALSE,34.1245997871058,26.1984685870141,"23"
export_AJP SEB_A5_A05_CD8 _2020-06-15,-297.373016,137.556168,600.933716,-31.884983,1276.425537,818.84491,-764.424438,-574.710938,470.640289,29839.962891,-266.120178,FALSE,27.833831845274,-34.4027612449323,"25"
export_AJP SEB_A5_A05_CD8 _2020-06-15,933.423401,331.17395,350.976746,367.432861,437.578491,322.042053,57.173504,-240.957123,43.007412,4671.760254,99.465248,FALSE,8.34697340121955,-18.0705890106309,"25"
export_AJP SEB_A5_A05_CD8 _2020-06-15,-367.452179,251.354706,3446.638184,251.577713,1901.270752,1529.547729,80.631805,7737.980469,1195.840698,203.133804,174.37146,FALSE,-14.5852195181476,-32.018694352451,"24"
export_AJP SEB_A5_A05_CD8 _2020-06-15,25547.875,62.355839,1753.161499,544.269958,2153.41626,70.812378,301.15332,-4.728023,98.71785,893.34967,356.357147,FALSE,32.1116437956043,37.6856951776469,"5"
export_AJP SEB_A5_A05_CD8 _2020-06-15,-573.721252,209.392365,958.460571,185.033447,680.747986,2422.74585,-473.467896,6752.046387,458.553925,23158.375,-92.966339,FALSE,2.439981517705,-31.3710622602675,"25"
export_AJP SEB_A5_A05_CD8 _2020-06-15,-388.257843,179.694443,1019.381348,272.935333,285.266083,300.654541,71.936218,428.348145,844.70282,200.405319,258.102051,FALSE,2.65470826831399,-13.7126643980903,"9"
export_AJP SEB_A5_A05_CD8 _2020-06-15,-599.061707,192.270554,556.56604,182.598511,2495.993408,269.705383,380.163116,3215.835449,774.646362,232.739349,142.962891,FALSE,11.2088542017633,-11.6330704376506,"28"
export_AJP SEB_A5_A05_CD8 _2020-06-15,-439.754852,150.272339,-409.17807,179.32077,902.115662,1881.000854,-550.175232,3195.240234,12204.28418,-76.413155,979.670715,FALSE,-48.3702643543748,6.73266932661862,"7"
export_AJP SEB_A5_A05_CD8 _2020-06-15,-169.810471,180.230698,-110.551125,191.74118,636.130859,224.252487,-320.27124,-878.103333,7426.710449,329.490204,8342.600586,FALSE,-19.4293283863009,24.5905312329546,"20"
export_AJP SEB_A5_A05_CD8 _2020-06-15,258.84198,163.765259,1226.248169,108.07473,17.886026,2489.399414,-0.355305,5077.534668,753.923462,381.419434,6469.479492,TRUE,-24.0025441077547,-41.249971456347,"24"
export_AJP SEB_A5_A05_CD8 _2020-06-15,1757.963013,204.762039,372.409912,1697.331177,3591.958984,477.33017,164.563721,-13.763016,5633.007324,4839.28125,411.865021,FALSE,22.3442820613019,-14.487636724076,"7"
export_AJP SEB_A5_A05_CD8 _2020-06-15,6642.722168,112.918976,1627.36438,392.05954,535.64624,-1189.171997,82.338295,3562.303711,5988.802246,2257.841064,156274.625,FALSE,-18.0075324340069,70.7282962877142,"22"
export_AJP SEB_A5_A05_CD8 _2020-06-15,6040.293457,198.486786,404.109406,133.176498,75.424194,351.10498,4.482519,5251.015137,76.329002,236.489182,2715.455566,FALSE,17.3300859970243,22.1037534516396,"15"
export_AJP SEB_A5_A05_CD8 _2020-06-15,479.888855,29.028679,369.521088,179.726395,129.912537,115.754639,59.912712,27338.224609,889.776306,355.848114,88.438568,FALSE,-28.4153337845482,-16.9614957268169,"3"
export_AJP SEB_A5_A05_CD8 _2020-06-15,-573.230225,126.373062,235.90538,162.905457,206.307068,607.804871,-40.905441,-160.182861,16.56547,808.736206,1001.360046,FALSE,0.535515288729068,-23.4212098381832,"16"
export_AJP SEB_A5_A05_CD8 _2020-06-15,1114.214966,187.650208,363.320953,187.499207,-123.708015,372.036987,12.591254,7472.272949,125.776619,354.717224,1789.699951,FALSE,-8.52916968982957,-9.5623981790341,"6"
export_AJP SEB_A5_A05_CD8 _2020-06-15,-529.891907,179.011963,903.934753,53.648651,980.172974,351.264008,-561.752991,410.854309,248.51915,26188.244141,350.631256,FALSE,27.4039433378025,-34.5679986122137,"25"
export_AJP SEB_A5_A05_CD8 _2020-06-15,4254.722168,79.990128,642.319885,125.917419,160.570908,576.619629,76.154289,641.651672,351.637207,419.537903,15496.398438,FALSE,1.86833829148333,32.3030261101786,"15"
export_AJP SEB_A5_A05_CD8 _2020-06-15,514.909546,97.667976,1000.570313,153.865051,59.352104,1123.558838,72.713684,6915.497559,2236.512207,309.940063,6107.65332,FALSE,-23.4501961324013,-13.3532331396681,"2"
export_AJP SEB_A5_A05_CD8 _2020-06-15,-197.484833,106.27784,1945.521484,188.946442,705.835266,4778.80957,138.487427,14391.625977,589.378418,196.425491,1133.1875,FALSE,-28.5859212372709,-38.4827591934835,"24"
export_AJP SEB_A5_A05_CD8 _2020-06-15,1312.983521,79.765076,547.253357,178.23378,174.210938,428.496948,32.821583,14600.800781,29.468237,478.162109,4802.724121,FALSE,-15.89637731883,-9.73181313801614,"6"
export_AJP SEB_A5_A05_CD8 _2020-06-15,71.423714,159.015244,556.641479,428.547791,-53.89822,825.742126,55.07481,1555.969116,259.67865,548.801941,8568.415039,FALSE,-8.63164276603371,11.09660684769,"14"
export_AJP SEB_A5_A05_CD8 _2020-06-15,396.473541,36.919918,132.226639,58.545315,566.148987,1103.462891,197.059998,10838.738281,5130.358887,369.726868,193.135254,FALSE,-27.1001329839537,-11.3048844859903,"2"
export_AJP SEB_A5_A05_CD8 _2020-06-15,504.843414,102.238724,2532.846924,224.603699,607.619324,3242.904297,67.938522,3439.980957,2951.874023,1122.555908,325.326172,FALSE,-23.503000255362,-36.9279700595092,"24"
export_AJP SEB_A5_A05_CD8 _2020-06-15,-440.850189,186.52829,1289.912476,164.909821,485.130768,161.254349,46.011593,6241.82373,303.534302,488.019318,9188.238281,FALSE,-1.00079327894649,26.743702785994,"14"
export_AJP SEB_A5_A05_CD8 _2020-06-15,-1838.09082,7427.921387,200839.921875,144951.4375,253637.421875,-2195.072266,-44826.433594,-66696.945313,229237.515625,-69940.359375,-2954.751953,FALSE,-17.7134709853624,6.119042953646,"24"
export_AJP SEB_A5_A05_CD8 _2020-06-15,8709.431641,46.97464,217.467667,124.883522,1645.561157,165.09082,-177.447647,-87.059738,142.317917,5531.853027,-265.806854,FALSE,31.6109168367296,29.3830001509372,"12"
export_AJP SEB_A5_A05_CD8 _2020-06-15,10442.524414,29.290554,256.013397,486.40979,933.42688,-4.78271,69.420944,214.480957,667.541626,114.18824,179.718857,FALSE,31.9442714125158,32.9080331190388,"23"
export_AJP SEB_A5_A05_CD8 _2020-06-15,238.855881,298.347992,202.020828,599.91571,1100.245239,2179.743652,252.415604,4965.85791,2049.254395,405.818848,316.018585,FALSE,-16.9162168589479,-38.1280689693595,"24"
export_AJP SEB_A5_A05_CD8 _2020-06-15,2138.049072,124.14846,437.60434,116.916283,291.025482,604.028625,6.253641,4933.402344,242.321457,505.112152,3738.425049,FALSE,6.35087771301366,9.09882034871091,"14"
export_AJP SEB_A5_A05_CD8 _2020-06-15,1100.330811,105.268921,1909.806885,130.251312,637.807983,526.898315,33.70335,2044.722168,1602.81958,1545.574707,37515.816406,FALSE,-8.55812258197284,50.2425738557559,"22"
export_AJP SEB_A5_A05_CD8 _2020-06-15,702.076721,272.097504,401.829742,743.660217,427.7146,497.778992,49.208954,4241.19043,490.056061,1639.963379,277.945374,FALSE,-0.386277859598675,-21.5341231007866,"11"
export_AJP SEB_A5_A05_CD8 _2020-06-15,1035.251099,164.37851,255.515961,89.932045,502.778107,296.1987,66.540207,188.128098,273.576691,-47.252884,805.636719,FALSE,9.66426093051221,-2.60456465126085,"9"
export_AJP SEB_A5_A05_CD8 _2020-06-15,689.872742,299.445038,622.792786,259.063354,171.216156,157.497025,140.417114,575.577393,1214.848267,88.488625,65.384811,FALSE,5.81196820196155,-4.46170893110782,"9"
export_AJP SEB_A5_A05_CD8 _2020-06-15,275.712921,94.073051,286.783813,103.443001,275.674683,650.938965,-10.720449,-305.025421,272.433807,131.803314,751.339966,FALSE,-1.13944878976996,-20.0804946775174,"16"
export_AJP SEB_A5_A05_CD8 _2020-06-15,1044.344727,134.810745,413.276123,371.407013,1085.998779,701.002808,17.120678,2881.901367,963.696533,98.1492,2887.265381,FALSE,-3.33554357132921,-23.2161126793648,"10"
export_AJP SEB_A5_A05_CD8 _2020-06-15,360.654816,99.573761,174.61142,56.119442,1229.660278,2745.143555,-38.407215,12098.138672,9994.100586,-39.97678,124.827332,FALSE,-42.8365932572059,-8.86778567224971,"7"
export_AJP SEB_A5_A05_CD8 _2020-06-15,989.889709,111.077133,917.970093,290.317505,802.99823,750.632019,-9.748568,2902.31543,303.482239,951.514893,-5.597483,FALSE,-2.92983085859678,-22.1998840665962,"16"
export_AJP SEB_A5_A05_CD8 _2020-06-15,9108.758789,268.042236,333.747681,571.903442,2451.87085,135.085129,-140.278595,444.110809,361.076721,9153.293945,208.726501,FALSE,30.7942123863942,30.0945439403959,"12"
export_AJP SEB_A5_A05_CD8 _2020-06-15,873.601196,52.178967,-556.054932,193.117859,221.015839,107.576057,-725.968811,5745.23877,12124.023438,-297.122742,2247.559814,FALSE,-32.6344488095201,23.0787051815673,"20"
export_AJP SEB_A5_A05_CD8 _2020-06-15,738.500366,62.489288,369.182404,170.282379,867.929626,529.70697,-35.414181,7146.328125,622.576904,628.899231,-94.578026,FALSE,-4.22980218191602,-20.7758954269809,"11"
export_AJP SEB_A5_A05_CD8 _2020-06-15,306.008301,217.194,2430.323486,218.586044,798.262451,297.507813,4.223836,3842.415527,300.040558,2722.453857,301.489136,FALSE,1.10613553096026,-16.1144182753905,"6"
export_AJP SEB_A5_A05_CD8 _2020-06-15,9490.239258,160.745972,131.824493,995.744568,725.263733,21.969894,80.082771,-61.79808,4168.87207,224.954483,26.582798,FALSE,32.0551228875055,30.4677049805773,"5"
export_AJP SEB_A5_A05_CD8 _2020-06-15,492.577637,121.34198,414.358917,111.383865,628.032471,291.79715,95.810852,5373.406738,134.33519,205.517532,995.835388,FALSE,-3.33212187575963,-14.6410288961011,"11"
export_AJP SEB_A5_A05_CD8 _2020-06-15,418.819824,17.67075,981.093994,200.215668,60.063999,2423.924561,-354.490906,-418.289124,14568.435547,377.759094,9406.59082,FALSE,-47.620854749383,1.82054913626351,"7"
export_AJP SEB_A5_A05_CD8 _2020-06-15,202.171463,210.844421,2191.170166,775.294495,934.497009,2682.815674,183.531082,89.770599,786.178894,398.621094,460.878754,FALSE,-20.9273724390933,-37.0235781793551,"24"
export_AJP SEB_A5_A05_CD8 _2020-06-15,8046.378906,161.17836,1352.930664,187.1138,1791.32251,563.615906,-89.184364,180.283356,306.64798,13761.575195,301.840485,FALSE,31.7173557822791,25.5033794559793,"12"
export_AJP SEB_A5_A05_CD8 _2020-06-15,190.758774,206.337524,1672.196533,390.45105,1784.699463,959.572754,49.058117,389.992981,366.663055,2439.313721,2036.049805,FALSE,-2.11437980261491,-30.7251281765754,"24"
export_AJP SEB_A5_A05_CD8 _2020-06-15,390.072937,371.372681,1054.63562,796.916931,194.20108,760.156982,-32.347755,6758.202148,545.010376,248.065323,1807.519653,FALSE,-6.47457746032631,-18.5660267548593,"16"
export_AJP SEB_A5_A05_CD8 _2020-06-15,6594.597656,75.022751,151.13681,355.19754,1160.202759,88.363586,-27.219631,-31.099483,604.350952,486.25531,124.313271,FALSE,30.6789009686405,22.5381494693848,"18"
export_AJP SEB_A5_A05_CD8 _2020-06-15,322.457245,75.392204,334.214691,281.980377,1600.557861,958.887146,33.012501,14370.459961,1067.11731,327.093445,1490.963379,FALSE,-15.2709873291584,-28.2312196978663,"2"
export_AJP SEB_A5_A05_CD8 _2020-06-15,6819.038574,114.861832,405.964935,487.322906,3693.892578,543.491699,7.878852,-29.250795,311.035797,4586.304199,164.314178,FALSE,34.5873568130756,24.6736597517202,"23"
export_AJP SEB_A5_A05_CD8 _2020-06-15,8168.529785,197.966782,170.623871,445.332489,1422.665894,210.325424,39.926693,432.863281,139.109207,1211.282471,655.091431,TRUE,29.1061418423067,29.0178946631851,"23"
export_AJP SEB_A5_A05_CD8 _2020-06-15,608.253235,274.082703,541.112793,807.628967,298.347107,917.469238,30.536848,10573.800781,1987.771851,549.144958,6310.162598,FALSE,-21.5164764386592,-15.5704669369338,"10"
export_AJP SEB_A5_A05_CD8 _2020-06-15,11927.776367,142.962387,91.610718,912.139465,951.366028,-7.913948,54.097462,-22.843594,582.086365,422.139771,196.713959,FALSE,31.5203581879926,33.3682997711775,"23"
export_AJP SEB_A5_A05_CD8 _2020-06-15,128.181,98.628784,896.693909,308.131744,1461.635864,882.695007,99.075348,10999.634766,255.782684,1113.68811,776.001038,FALSE,-6.66415032622454,-30.330345313527,"13"
export_AJP SEB_A5_A05_CD8 _2020-06-15,253.55809,78.414215,675.317749,161.206177,903.030334,305.046051,56.795792,2891.418701,135.427872,240.821365,5639.263184,FALSE,0.685793197449598,16.0215452494311,"11"
export_AJP SEB_A5_A05_CD8 _2020-06-15,15398.709961,209.764526,598.495605,692.90332,1489.19165,154.175522,-60.811531,310.064362,330.322357,1071.438354,397.667084,FALSE,31.1971360687343,33.5879738246474,"5"
export_AJP SEB_A5_A05_CD8 _2020-06-15,311.108917,59.903587,419.90274,123.306992,602.310608,1830.358154,57.733028,-171.953644,1042.150879,257.039215,2562.550049,TRUE,-19.9051160167496,-39.5480157694474,"24"
export_AJP SEB_A5_A05_CD8 _2020-06-15,3657.157471,214.995407,362.9133,286.746521,1445.292969,1444.43335,11.833062,5082.262695,351.656525,906.487976,30.079735,FALSE,6.23324412098367,-3.17728064072627,"15"
export_AJP SEB_A5_A05_CD8 _2020-06-15,609.995728,106.642876,865.922974,161.168716,343.788147,230.180756,60.106731,1906.008911,198.710861,3615.705811,155.64595,FALSE,4.08538859558132,-15.9858356010927,"25"
export_AJP SEB_A5_A05_CD8 _2020-06-15,11609.229492,102.355179,236.450867,848.693481,1300.408447,69.640778,148.499176,-170.928467,554.086731,31.796183,243.342712,FALSE,31.6517979306773,33.2725190102487,"23"
export_AJP SEB_A5_A05_CD8 _2020-06-15,252.799545,170.444626,914.510315,212.71875,536.314148,250.950012,32.527603,4373.384277,493.68692,2548.361572,470.798767,FALSE,1.71020978060611,-18.4561113047014,"11"
export_AJP SEB_A5_A05_CD8 _2020-06-15,1972.842529,139.324768,365.424255,189.564804,381.707855,286.292206,0.399789,57.857899,264.633575,1767.034668,209.679794,FALSE,16.6372753192549,5.32084485989679,"9"
export_AJP SEB_A5_A05_CD8 _2020-06-15,4007.328125,172.85112,230.207855,2040.130371,2238.990234,516.50708,-436.985321,-233.41922,3858.546143,23381.5625,145.483337,FALSE,30.5268032037942,-34.4820028278308,"12"
export_AJP SEB_A5_A05_CD8 _2020-06-15,174.324951,244.36705,1329.619507,158.58017,633.601196,1181.567261,41.833633,11459.024414,4394.961914,735.026001,8363.483398,FALSE,-27.5059398679761,-6.64363918869428,"2"
export_AJP SEB_A5_A05_CD8 _2020-06-15,1823.522095,193.785309,2450.309814,296.554718,3052.141113,1863.712524,-1372.689575,-598.63147,935.647705,85397.742188,-697.115173,FALSE,43.6412722141001,-37.8871513370158,"27"
export_AJP SEB_A5_A05_CD8 _2020-06-15,522.285706,312.834686,2537.154541,122.442215,775.384216,2129.590576,-103.811089,-223.199432,1222.039063,9927.866211,-108.125885,FALSE,-13.9132709564515,-39.0956177935845,"25"
export_AJP SEB_A5_A05_CD8 _2020-06-15,305.813324,180.402847,500.337982,236.585358,197.826157,211.042679,90.754799,13543.03418,357.204102,1089.250732,329.016174,FALSE,-13.265019695376,-11.4900163569303,"6"
export_AJP SEB_A5_A05_CD8 _2020-06-15,1049.162109,69.773544,15.168075,203.76062,13.820377,806.425171,93.487991,2632.579346,4013.398682,154.381836,11180.929688,FALSE,-11.9792523138335,27.1318815174462,"21"
export_AJP SEB_A5_A05_CD8 _2020-06-15,162.46817,146.065918,387.348328,100.478378,654.799988,686.136475,-18.832411,-95.987076,114.836014,420.153168,842.123962,TRUE,-2.42308476763438,-26.4104914673248,"16"
export_AJP SEB_A5_A05_CD8 _2020-06-15,5044.574219,87.018784,225.583344,145.950775,40.270367,372.535583,110.1595,811.03949,1356.968628,256.4021,44.515057,FALSE,22.7167879598735,18.9050174972799,"15"
export_AJP SEB_A5_A05_CD8 _2020-06-15,1154.600586,67.432129,1358.457275,616.06488,1713.651123,221.00415,24.327377,6577.468262,681.437744,147.068436,368.130371,FALSE,8.24557355847446,-9.08540837147874,"11"
export_AJP SEB_A5_A05_CD8 _2020-06-15,2399.494141,148.286865,451.25946,351.557007,1163.445679,679.739868,38.745964,12370.898438,66.798729,1296.241211,412.956177,FALSE,-1.78825211366206,-9.91788836881573,"15"
export_AJP SEB_A5_A05_CD8 _2020-06-15,1689.302124,166.006393,317.444,40.102581,979.314758,639.417786,19.928101,-81.698158,170.099991,734.529907,24241.693359,FALSE,-8.52700454527513,47.8974730152531,"22"
export_AJP SEB_A5_A05_CD8 _2020-06-15,-18.170174,97.58886,475.589813,176.662842,-110.218643,764.906799,-2.347012,3068.484375,122.284653,1070.497925,1647.267944,FALSE,-4.28504569159388,-21.6607635627729,"16"
export_AJP SEB_A5_A05_CD8 _2020-06-15,-43.440174,168.662079,260.946533,99.893562,309.184723,268.022095,-21.322767,322.748383,47.431503,896.868835,821.368347,TRUE,5.09973378693993,-16.6648938179428,"9"
export_AJP SEB_A5_A05_CD8 _2020-06-15,396.809692,147.04631,293.951172,137.480255,134.381485,49.835701,24.618202,-271.012299,956.339905,241.681519,307.780304,FALSE,4.75643034419082,-7.04470892603172,"9"
export_AJP SEB_A5_A05_CD8 _2020-06-15,93.832504,81.60479,423.766327,174.589417,1385.707031,1041.5354,-50.676266,12365.755859,976.869812,162.747589,294.817657,FALSE,-14.2280943907381,-27.0504467189878,"2"
export_AJP SEB_A5_A05_CD8 _2020-06-15,6448.453613,172.402206,1312.867676,621.600464,3288.280762,390.880981,68.313652,-62.869724,1648.608398,2923.178467,-73.041023,FALSE,37.9964655849664,25.4483868621997,"23"
export_AJP SEB_A5_A05_CD8 _2020-06-15,28.291279,119.655098,562.417603,86.503677,421.37677,317.004852,52.391457,-61.304779,107.012169,632.540588,957.960571,FALSE,2.52655305445184,-14.4100087562805,"16"
export_AJP SEB_A5_A05_CD8 _2020-06-15,938.567566,53.303535,249.251724,1956.416626,658.429932,314.867218,-69.18705,5946.757813,1402.658813,397.691437,247.244217,FALSE,7.34454563661876,-9.07515881008554,"11"
export_AJP SEB_A5_A05_CD8 _2020-06-15,444.723297,164.665634,1076.809814,234.789276,1189.407349,1349.324219,5.082555,5649.487305,362.296387,2845.830811,8265.31543,FALSE,-15.7107095346939,-26.2812336581636,"10"
export_AJP SEB_A5_A05_CD8 _2020-06-15,597.924377,160.391525,332.746521,179.23349,88.818535,1360.372437,-18.760433,3255.036621,1090.130005,631.366394,3022.391357,FALSE,-10.5058964899557,-27.9967693028885,"24"
export_AJP SEB_A5_A05_CD8 _2020-06-15,3427.74585,154.595291,254.189697,22.809967,241.509644,460.04776,32.939533,5765.163086,212.137878,84.239502,832.216858,FALSE,17.0828950205626,14.7171392066896,"15"
export_AJP SEB_A5_A05_CD8 _2020-06-15,30744.900391,57.069202,459.613983,472.452026,1770.388062,-22.732077,94.835091,20.462646,289.871643,384.937408,1323.415527,FALSE,29.3319237102547,37.4105282996926,"5"
export_AJP SEB_A5_A05_CD8 _2020-06-15,793.08136,184.579926,500.095795,140.400467,1331.146606,223.939438,-171.986847,68.980171,350.704956,16643.201172,364.368317,FALSE,22.5235956732154,-35.9349410294792,"25"
export_AJP SEB_A5_A05_CD8 _2020-06-15,2441.887451,233.811493,924.023987,3149.65625,2227.741943,255.243011,-22.138361,-453.198364,2048.909912,464.280792,599.164551,FALSE,35.7764615296384,2.61566695211269,"18"
export_AJP SEB_A5_A05_CD8 _2020-06-15,1006.156555,135.148682,439.585358,308.445282,2923.144043,288.91687,-508.561646,370.064087,17.848091,35263.210938,4145.524902,FALSE,35.5119257715493,-38.2492513912322,"10"
export_AJP SEB_A5_A05_CD8 _2020-06-15,147.4646,163.647797,900.570801,239.038986,660.208252,1177.069214,118.774773,7716.195801,521.294678,806.981323,1700.405396,FALSE,-10.041432781958,-29.8123782412366,"16"
export_AJP SEB_A5_A05_CD8 _2020-06-15,12838.725586,44.944836,608.131531,1155.249023,1140.682983,-18.90151,-32.340183,-462.198273,904.146667,228.419952,290.258881,FALSE,32.573337509924,33.9994361244231,"23"
export_AJP SEB_A5_A05_CD8 _2020-06-15,1175.384766,159.424072,416.899109,265.106781,146.867416,571.868958,426.676147,2784.802002,2959.625488,550.74115,6634.601074,FALSE,-15.3465815231284,9.71939886813116,"7"
export_AJP SEB_A5_A05_CD8 _2020-06-15,310.170197,250.046768,826.88385,410.92984,1379.324585,904.591736,-658.124084,3715.124756,1675.354858,32534.660156,376.167511,FALSE,28.9879503532805,-34.2845244278697,"25"
export_AJP SEB_A5_A05_CD8 _2020-06-15,5212.594238,132.364853,492.133118,1349.417969,1730.338013,160.468475,-33.281345,480.906158,210.360046,1465.048828,24.247896,FALSE,33.0557773042495,18.7759464196803,"18"
export_AJP SEB_A5_A05_CD8 _2020-06-15,3275.04248,40.854496,328.372986,1697.218506,686.914063,216.67659,-114.692207,-421.0625,1906.430542,576.953735,165.860168,TRUE,23.1506224230507,10.0864514409143,"18"
export_AJP SEB_A5_A05_CD8 _2020-06-15,17057.570313,197.191849,485.092072,1221.100464,1547.171631,-45.646145,25.523014,635.178894,88.28405,1153.748657,282.685303,FALSE,31.2126395717843,34.3057728312175,"5"
export_AJP SEB_A5_A05_CD8 _2020-06-15,2003.549072,156.263214,575.119934,116.612785,75.665977,540.222534,-23.88184,1626.198608,229.982117,208.189514,2564.874268,FALSE,10.7065366406372,9.77805792141106,"9"
export_AJP SEB_A5_A05_CD8 _2020-06-15,108.099197,76.831512,611.997131,208.044449,1234.39856,1063.286011,-24.088564,14850.932617,328.324799,2062.044922,-90.696297,FALSE,-14.8275517655086,-27.7329515974077,"2"
export_AJP SEB_A5_A05_CD8 _2020-06-15,-1209.187256,39.042385,3223.863037,100.01265,533.241211,3698.457764,70.438889,25673.466797,855.560425,912.561401,13405.506836,FALSE,-30.3273698517971,-33.0746631656492,"2"
export_AJP SEB_A5_A05_CD8 _2020-06-15,8895.350586,181.903061,179.206589,952.454407,975.576599,-58.516022,4.751816,-14.684114,62.347862,979.480896,-12.799377,FALSE,30.8793090654293,28.4183292086672,"23"
export_AJP SEB_A5_A05_CD8 _2020-06-15,9512.25,101.794151,233.183014,112.75206,-26.307468,159.873428,14.69698,2529.579834,29.7535,925.793884,513.076843,FALSE,25.3971413934713,29.4897542063403,"5"
export_AJP SEB_A5_A05_CD8 _2020-06-15,1704.249268,234.32579,265.000946,169.974487,547.431213,212.623642,-19.22307,1532.547974,792.267578,63.957512,454.296814,FALSE,14.7905436333288,4.04269886104343,"9"
export_AJP SEB_A5_A05_CD8 _2020-06-15,454.465454,91.2929,1826.731812,255.180374,2455.629395,762.595642,28.024147,1180.796875,270.05719,1207.41626,552.357239,FALSE,3.50770131923657,-27.1153721145695,"24"
export_AJP SEB_A5_A05_CD8 _2020-06-15,210.002975,176.332932,1856.571899,655.784668,2741.188965,1199.405273,9.619475,38960.753906,743.210083,734.456177,1091.375122,FALSE,-32.8886923761644,-22.7490115712471,"3"
export_AJP SEB_A5_A05_CD8 _2020-06-15,794.182434,81.632629,274.803894,92.492546,533.51532,944.402527,271.672516,686.827087,2302.612061,473.222015,2794.210693,FALSE,-12.0296406874428,-17.71367901771,"7"
export_AJP SEB_A5_A05_CD8 _2020-06-15,726.60321,121.008598,335.410339,136.843918,203.592529,415.655548,-50.130463,3528.999512,264.921417,180.225723,7697.330078,FALSE,-0.267609053501204,22.8375188575284,"14"
export_AJP SEB_A5_A05_CD8 _2020-06-15,29.717796,97.888077,171.838242,140.082596,-192.040268,455.130829,-40.67065,2322.570557,-30.506992,891.027527,96.988457,FALSE,-1.73434010702706,-17.3824977263037,"16"
export_AJP SEB_A5_A05_CD8 _2020-06-15,238.0103,206.628815,1595.964233,580.198669,1016.274719,862.012085,199.536453,5498.830566,179.656601,962.651733,5701.95459,FALSE,-10.3763620279285,-24.1176968856138,"24"
export_AJP SEB_A5_A05_CD8 _2020-06-15,-191.000641,51.879456,-524.278137,120.438515,162.795822,2252.29248,-36.541126,-7.83983,22202.613281,419.713715,6388.72998,FALSE,-48.5586800172283,11.7935081256481,"7"
export_AJP SEB_A5_A05_CD8 _2020-06-15,-480.144684,56.435646,292.190491,866.228088,556.490967,346.122375,182.756546,4547.397461,68.412277,847.302917,42091.945313,FALSE,-9.35552107060441,52.1473322584713,"22"
export_AJP SEB_A5_A05_CD8 _2020-06-15,2095.594482,114.051468,646.236389,627.242676,415.690552,1427.870117,-193.350037,12230.345703,2284.52417,2635.123779,69261.28125,FALSE,-11.5232199174367,56.0695962950062,"22"
export_AJP SEB_A5_A05_CD8 _2020-06-15,7862.70752,213.844193,332.73407,1022.037354,1890.984863,186.313858,-104.010864,88.796814,566.406128,688.835815,234.172226,FALSE,33.8465931373384,26.5592168272841,"23"
export_AJP SEB_A5_A05_CD8 _2020-06-15,864.932007,151.21283,523.173096,132.789032,210.806274,615.411621,48.502815,4690.999512,144.355438,474.954773,3614.607178,FALSE,-7.68075604561925,-16.7754344323757,"16"
export_AJP SEB_A5_A05_CD8 _2020-06-15,68.072662,235.780792,448.616333,169.831177,505.164093,927.503052,30.029558,11481.62793,99.426567,881.007996,4879.82373,FALSE,-15.341083255213,-22.914531998231,"10"
export_AJP SEB_A5_A05_CD8 _2020-06-15,630.948242,29.555092,334.77829,188.273438,1421.666992,464.393494,-30.32563,4833.946289,567.800537,325.680634,-46.587387,FALSE,1.25853147119838,-24.1041754749509,"11"
export_AJP SEB_A5_A05_CD8 _2020-06-15,771.805115,172.664658,1001.795715,783.740356,503.523468,343.016022,114.130234,5458.485352,832.439148,266.176758,262.545807,FALSE,-1.00701690564487,-14.0893631171697,"11"
export_AJP SEB_A5_A05_CD8 _2020-06-15,10365.430664,216.881058,356.012604,1574.748413,2205.124268,236.515411,-19.609865,-233.101151,782.583557,466.536621,229.229523,FALSE,33.2638620548295,30.2887619206668,"23"
export_AJP SEB_A5_A05_CD8 _2020-06-15,520.270569,192.519791,1218.897217,149.131058,849.334351,911.283813,4.169044,7011.125488,199.089523,312.614014,4772.129395,FALSE,-11.6773193483635,-22.9915083304537,"16"
export_AJP SEB_A5_A05_CD8 _2020-06-15,5181.368652,138.045364,166.542953,1183.495972,1287.861694,98.628807,-31.892197,-38.470802,324.715881,1381.709595,1074.868896,FALSE,30.936749477786,17.3432183023204,"18"
export_AJP SEB_A5_A05_CD8 _2020-06-15,9128.439453,75.031326,266.008789,2226.188477,1447.540039,80.44278,27.071609,490.931671,-132.042709,906.134094,-45.219627,FALSE,33.8050664659564,28.6652115761512,"23"
export_AJP SEB_A5_A05_CD8 _2020-06-15,95.991272,198.033615,413.725433,308.216431,1253.859375,320.748779,-0.174073,7859.304688,881.62677,415.350403,322.296814,FALSE,-2.20522279048576,-22.103202881185,"11"
export_AJP SEB_A5_A05_CD8 _2020-06-15,-102.702461,86.301056,1022.48645,153.505753,158.094055,2194.603027,411.653748,2313.287598,7406.02002,38.351299,834.959229,FALSE,-31.0079378019863,-6.28813369964529,"7"
export_AJP SEB_A5_A05_CD8 _2020-06-15,890.205261,173.082581,369.485657,200.800049,390.717285,246.767731,84.871048,4857.697266,264.656464,1334.880737,316.277863,TRUE,-6.38608964513889,-13.6755706496929,"16"
export_AJP SEB_A5_A05_CD8 _2020-06-15,-160.435181,138.097717,217.337357,594.065186,1844.935913,3425.063232,104.427597,14294.931641,6143.656738,-253.264008,1897.510254,FALSE,-28.3128659316002,-37.9798375079532,"24"
export_AJP SEB_A5_A05_CD8 _2020-06-15,615.442749,73.903564,163.716095,173.545334,584.896973,588.770752,-43.739601,4829.898926,891.989014,248.146469,233.915298,FALSE,-3.66734849343297,-21.1537172140952,"11"
export_AJP SEB_A5_A05_CD8 _2020-06-15,4020.322021,101.022285,581.936279,1076.220581,1856.856201,19.657286,-22.738045,4121.282227,885.579163,121.015701,400.87796,FALSE,30.2683456469713,16.346574406779,"18"
export_AJP SEB_A5_A05_CD8 _2020-06-15,859.079529,132.12767,970.438477,60.945786,176.888855,1025.154297,63.328266,3669.719482,433.905182,83.550667,1929.5271,FALSE,-8.55081390856652,-22.68598744898,"16"
export_AJP SEB_A5_A05_CD8 _2020-06-15,197.918106,101.025124,407.125305,165.449799,36.526333,537.235535,-11.547575,193.542053,460.987213,3321.484863,-95.174126,FALSE,2.5661106297861,-22.8379385521932,"16"
export_AJP SEB_A5_A05_CD8 _2020-06-15,-9.116055,116.94339,296.482269,157.704239,166.132874,520.269653,-16.078949,801.270447,215.568222,346.459534,14919.893555,FALSE,-4.75981451645144,37.7344917255507,"14"
export_AJP SEB_A5_A05_CD8 _2020-06-15,825.09259,150.283875,391.345764,190.717651,3324.171875,380.267639,-13.246519,321.592896,468.261993,2326.99585,232.529648,FALSE,25.6959749097219,-18.2122281146035,"29"
export_AJP SEB_A5_A05_CD8 _2020-06-15,430.084717,226.225235,3291.311035,776.385193,621.506042,855.849731,-35.893665,11990.761719,1488.661865,893.650513,678.45166,FALSE,-10.9169348260939,-16.0522842271453,"6"
export_AJP SEB_A5_A05_CD8 _2020-06-15,7047.229492,-12.270934,1836.730347,179.628098,282.938721,2233.578369,115.570122,2003.119751,4829.824707,1074.915894,6059.901367,FALSE,5.83582583936038,12.3849273836811,"15"
export_AJP SEB_A5_A05_CD8 _2020-06-15,112.497719,146.219406,263.95697,120.093636,958.544983,1061.386841,68.074715,-204.463608,117.423912,498.534027,931.733643,FALSE,-5.01858467116689,-30.4418983953048,"16"
export_AJP SEB_A5_A05_CD8 _2020-06-15,955.660034,153.093475,2121.462158,79.836815,1649.282837,1031.279541,-139.876816,4624.907715,72.4701,14547.250977,93.035393,FALSE,9.51323393447417,-34.8270491684879,"25"
export_AJP SEB_A5_A05_CD8 _2020-06-15,197.662155,188.425842,312.935211,444.458649,969.107422,201.39032,31.072319,2430.9104,1049.129639,49.969395,174.163452,FALSE,6.14618767061343,-14.4200635549036,"11"
export_AJP SEB_A5_A05_CD8 _2020-06-15,-94.546097,104.893867,1236.983154,245.865601,-53.177013,108.625443,-56.413998,4917.660156,223.611816,621.169983,9690.780273,FALSE,-0.497098463219825,28.5012544704021,"14"
export_AJP SEB_A5_A05_CD8 _2020-06-15,1346.860352,150.062149,470.866058,121.735146,250.900681,680.058594,283.655975,2357.992432,118.868965,1179.061157,73.624474,TRUE,-4.21922320259709,-22.8613937240277,"16"
export_AJP SEB_A5_A05_CD8 _2020-06-15,763.709656,81.948654,260.942383,35.547417,583.764587,1002.389648,27.909204,78.701927,54.292183,177.987778,772.241089,TRUE,-7.4408624582827,-29.6489164771872,"16"
export_AJP SEB_A5_A05_CD8 _2020-06-15,147.596573,160.213776,315.063843,369.676392,385.067413,226.063721,81.636642,1476.913452,947.352234,92.693771,245.821381,FALSE,3.02851869761703,-11.6821170089432,"9"
export_AJP SEB_A5_A05_CD8 _2020-06-15,25297.595703,233.497223,208.028046,996.425781,4128.883301,-102.875061,116.78064,257.768433,854.00293,143.990814,787.630249,FALSE,31.5120684094449,35.7672528631764,"5"
export_AJP SEB_A5_A05_CD8 _2020-06-15,359.52121,76.730591,307.422913,140.330521,789.416382,168.661224,-3.571535,204.270416,618.099182,37.984032,73.801453,TRUE,8.69751236127937,-9.42816836234674,"11"
export_AJP SEB_A5_A05_CD8 _2020-06-15,185.485611,251.643784,395.719971,168.102249,788.454773,2169.337158,-67.909523,18475.841797,1055.078857,223.286896,171.761337,FALSE,-27.4552960700241,-32.7177994724373,"2"
export_AJP SEB_A5_A05_CD8 _2020-06-15,4041.048584,156.856384,1114.223511,110.28054,148.973846,2193.811035,134.718033,2482.069092,133.501923,619.271179,1274.802124,FALSE,-10.4400435642157,-15.252917711688,"15"
export_AJP SEB_A5_A05_CD8 _2020-06-15,1430.724243,115.22892,282.905945,640.630005,-90.761543,9.103727,190.984253,1176.458618,228.262497,373.949127,12241.779297,FALSE,-1.98657314377653,33.0105951608879,"14"
export_AJP SEB_A5_A05_CD8 _2020-06-15,-236.781754,202.980896,376.908569,353.922607,132.322571,639.926575,46.837704,113.347061,204.937042,457.925232,3925.217041,FALSE,-2.52281449567424,-13.5562967518266,"14"
export_AJP SEB_A5_A05_CD8 _2020-06-15,1258.954956,133.036423,436.763367,220.510712,55.887012,196.516922,-35.297535,820.90741,110.36747,905.1745,177.320602,FALSE,10.6823310358607,1.05685048662949,"9"
export_AJP SEB_A5_A05_CD8 _2020-06-15,724.696228,106.964317,446.994751,229.080704,-6.702502,364.783478,-13.364878,686.0755,958.27655,292.598572,532.418945,FALSE,3.42643635722957,-6.55025118710229,"16"
export_AJP SEB_A5_A05_CD8 _2020-06-15,74.014679,-24.485651,256.36438,242.687653,325.553741,369.7388,44.501038,382.55072,483.623383,788.452576,2968.574219,FALSE,0.429412816251814,-10.8535089854042,"9"
export_AJP SEB_A5_A05_CD8 _2020-06-15,-343.296509,56.702297,17.347267,106.688423,708.165466,1332.577637,195.599091,2990.344971,8702.34668,156.627655,9087.695313,TRUE,-39.713273248072,1.58038460296984,"7"
export_AJP SEB_A5_A05_CD8 _2020-06-15,1389.522217,218.927536,514.388123,262.718689,372.196899,790.872498,-20.850523,3364.268555,971.378479,1016.569641,605.028198,FALSE,-3.69403332649048,-18.0489071604061,"16"
export_AJP SEB_A5_A05_CD8 _2020-06-15,2125.154541,168.202271,767.212036,556.612366,957.429932,525.861145,61.176365,2684.169678,564.49231,209.083832,194.159027,FALSE,15.5032518493162,4.61289794709189,"16"
export_AJP SEB_A5_A05_CD8 _2020-06-15,-388.704926,178.05307,1069.255615,311.834167,1121.7677,2918.849854,-261.482452,12196.501953,3797.049072,821.851624,7788.49707,FALSE,-25.7670093655479,-33.9511308379241,"2"
export_AJP SEB_A5_A05_CD8 _2020-06-15,134.450439,155.439178,288.616333,75.630196,140.693161,943.93927,-2.350441,223.35762,115.234489,573.288696,964.842773,FALSE,-4.20914869141381,-25.355206681697,"16"
export_AJP SEB_A5_A05_CD8 _2020-06-15,12262.686523,180.164124,168.146759,1001.278015,1176.906372,84.60186,85.675171,543.229919,945.896606,42.589058,-0.798089,TRUE,30.1903721593562,32.6293397744895,"23"
export_AJP SEB_A5_A05_CD8 _2020-06-15,-48.821838,146.228836,536.730347,885.484863,343.765442,455.043701,85.878448,8119.94043,150.547516,516.005371,2771.562988,FALSE,-7.5857045523785,-18.5880578371579,"16"
export_AJP SEB_A5_A05_CD8 _2020-06-15,873.025085,109.272598,339.497375,145.673889,357.529419,546.549316,-3.450216,796.850586,1131.607544,646.049316,238.925613,FALSE,1.56944100721712,-13.296285216524,"16"
export_AJP SEB_A5_A05_CD8 _2020-06-15,2409.446289,118.576355,189.857788,165.217896,7.174027,254.98764,80.216507,11415.600586,2261.14917,317.789307,633.301392,FALSE,1.84848082479563,7.9569079226438,"15"
export_AJP SEB_A5_A05_CD8 _2020-06-15,6068.037109,-16.062464,1118.979126,435.331329,1382.644653,380.531647,-243.32637,-63.504936,199.150803,16762.361328,6.125097,TRUE,31.2506675895985,20.6490351138184,"12"
export_AJP SEB_A5_A05_CD8 _2020-06-15,-21.131624,95.882668,244.87674,168.259094,1316.452881,739.67749,24.194103,296.314606,158.31488,291.881836,749.951599,FALSE,0.480051606447168,-25.9194539463565,"11"
export_AJP SEB_A5_A05_CD8 _2020-06-15,380.888855,186.723297,275.393402,508.352966,1284.18396,214.876617,-48.541168,42.857277,742.667114,625.989685,119.638596,FALSE,12.0134662436263,-14.4222152089121,"11"
export_AJP SEB_A5_A05_CD8 _2020-06-15,220.241669,172.478973,720.61969,91.26429,497.989868,1313.514648,-0.37334,3708.781738,985.865295,417.88446,704.641113,FALSE,-9.05935428644096,-29.9129751445474,"24"
export_AJP SEB_A5_A05_CD8 _2020-06-15,2010.890259,156.290649,302.972443,139.781357,46.346581,127.628754,-41.139378,-126.439171,1092.86731,229.886261,215.104111,FALSE,14.7486054760432,6.30706327023494,"9"
export_AJP SEB_A5_A05_CD8 _2020-06-15,706.062134,107.660431,224.515686,38.919861,651.047241,7.362699,-174.95134,6860.589355,100.079018,23071.859375,101.047928,FALSE,26.3408826227734,-39.9649645897445,"25"
export_AJP SEB_A5_A05_CD8 _2020-06-15,14962.217773,204.31485,1149.415405,118.982208,2317.625488,349.216095,-200.651581,571.627136,150.046829,12273.599609,269.821442,FALSE,30.4544662870442,33.9943803783955,"23"
export_AJP SEB_A5_A05_CD8 _2020-06-15,585.034424,166.875244,396.895569,148.901947,207.021301,359.498444,4.857075,3995.733398,130.844147,640.33313,6129.347656,FALSE,-0.288132887246193,16.461532549482,"14"
export_AJP SEB_A5_A05_CD8 _2020-06-15,2878.348145,94.695183,591.594666,474.70166,406.738556,143.8022,399.934875,2453.110352,1361.807617,877.082825,1436.893799,FALSE,13.6631717227733,11.3852085299807,"4"
export_AJP SEB_A5_A05_CD8 _2020-06-15,10800.893555,54.605946,456.466858,310.476135,778.38446,133.553329,92.415009,509.291351,897.385803,372.97641,127.129341,FALSE,31.2488832053944,33.0925335464232,"23"
export_AJP SEB_A5_A05_CD8 _2020-06-15,8118.90625,102.091164,109.680824,590.413452,794.824036,203.379028,61.466644,163.427185,1667.572144,290.529602,208.896729,FALSE,29.9204995956325,27.2726226074053,"23"
export_AJP SEB_A5_A05_CD8 _2020-06-15,1205.852905,126.169037,337.821991,87.94651,121.629631,487.695831,-44.482353,3400.313965,132.119583,410.737854,5645.627441,FALSE,3.07446059759838,12.5624313316813,"14"
export_AJP SEB_A5_A05_CD8 _2020-06-15,266.535217,46.371166,771.194397,185.356735,334.256897,1879.265137,38.902195,321.981903,1426.251465,2825.832764,422.95755,FALSE,-12.8619971445888,-34.8469902793681,"24"
export_AJP SEB_A5_A05_CD8 _2020-06-15,-69.926033,64.731117,420.506714,77.466583,809.265259,2354.722412,103.537926,22782.955078,579.326416,-68.114273,170.021423,FALSE,-27.4252554785485,-31.2626762909843,"2"
export_AJP SEB_A5_A05_CD8 _2020-06-15,242.11824,45.951828,606.700684,87.917534,804.092346,1759.161255,-2.955843,19031.933594,705.317749,118.443359,412.846832,FALSE,-26.3566583059452,-30.0549380057878,"2"
export_AJP SEB_A5_A05_CD8 _2020-06-15,7635.655762,98.155975,290.943573,3514.703125,1466.797485,31.94178,-57.333122,61.631012,153.669846,942.69104,238.472046,FALSE,36.2716649164534,23.8046746166051,"23"
export_AJP SEB_A5_A05_CD8 _2020-06-15,667.619202,169.66037,2477.460449,190.589966,276.093262,235.625122,205.010803,13092.578125,792.177246,415.850616,58.384167,FALSE,-12.3516994966564,-9.94079995650055,"6"
export_AJP SEB_A5_A05_CD8 _2020-06-15,389.738525,163.140945,343.596802,94.448906,29.964434,1167.62793,-37.037621,-7.440347,133.175262,356.931274,708.793091,FALSE,-6.66221176640292,-26.0797527839242,"16"
export_AJP SEB_A5_A05_CD8 _2020-06-15,9.568535,165.782562,204.751968,151.840073,346.062927,880.228943,64.6633,-301.433258,56.376347,416.478333,771.385376,FALSE,-2.8604666482997,-26.68522123993,"16"
export_AJP SEB_A5_A05_CD8 _2020-06-15,-6.127424,148.519226,190.840668,163.702682,439.625641,122.76284,-14.529825,1876.541016,1562.186768,-58.350601,231.63678,FALSE,3.88499813879296,-9.7941770375846,"9"
export_AJP SEB_A5_A05_CD8 _2020-06-15,334.970825,203.339417,144.005219,304.189148,253.351364,1422.748779,-62.437702,6993.381348,11625.523438,433.907196,12347.80957,FALSE,-38.8066942266087,7.31821899449785,"7"
export_AJP SEB_A5_A05_CD8 _2020-06-15,855.252869,76.960701,376.446838,15.803064,1663.399292,1086.479858,-487.982391,328.76178,426.1008,33771.84375,-654.593567,FALSE,29.9057629632363,-37.1629910931006,"25"
export_AJP SEB_A5_A05_CD8 _2020-06-15,-112.359482,-11.658962,834.317993,111.550781,221.666061,1149.115479,-10.287251,3033.630371,400.388519,110.810616,843.880676,FALSE,-7.52480010634708,-26.3521874343298,"16"
export_AJP SEB_A5_A05_CD8 _2020-06-15,341.242065,182.849533,2151.591064,263.165863,1014.540466,1303.435303,38.075951,834.290833,558.684326,1119.515503,291.384094,FALSE,-7.23903983135278,-29.5105370660735,"24"
export_AJP SEB_A5_A05_CD8 _2020-06-15,226.880707,87.916374,374.829346,389.602264,818.484619,140.847687,-70.22718,762.875366,196.633179,1049.727905,80.898163,FALSE,8.17943925754383,-13.089539413957,"11"
export_AJP SEB_A5_A05_CD8 _2020-06-15,677.831604,233.497101,250.326614,89.81221,57.003094,737.601685,55.541794,1314.952637,144.514664,898.232666,7.100101,FALSE,-3.33383314627881,-21.1283153168457,"16"
export_AJP SEB_A5_A05_CD8 _2020-06-15,-52.678284,96.577423,476.696167,78.617874,15.79849,1377.96167,146.037354,9470.418945,5411.968262,598.15271,447.859528,FALSE,-27.5621280561743,-12.8012570030522,"2"
export_AJP SEB_A5_A05_CD8 _2020-06-15,5084.443359,24.2743,195.366531,1242.25354,1371.117188,141.407501,35.705635,101.063957,152.205276,-25.461098,2289.710938,TRUE,28.1804707235264,16.3815934918371,"18"
export_AJP SEB_A5_A05_CD8 _2020-06-15,398.660431,163.786804,13232.532227,390.701843,1026.901367,399.69812,106.813644,5805.943848,249.767105,2010.401367,220.281616,FALSE,-11.8949800011599,-2.967343064765,"24"
export_AJP SEB_A5_A05_CD8 _2020-06-15,904.900208,284.611145,767.936646,556.764587,279.903534,338.66626,-31.965363,9030.091797,100.126526,1926.327148,452.870483,FALSE,-5.98586265823194,-13.7578278378298,"6"
export_AJP SEB_A5_A05_CD8 _2020-06-15,2225.405762,150.522903,441.232605,1109.716919,728.389343,642.021179,-63.723278,5910.69043,1988.956909,-174.24704,119.522675,FALSE,11.7139848359432,4.04836017229264,"15"
export_AJP SEB_A5_A05_CD8 _2020-06-15,259.363708,60.938923,407.189941,225.729858,847.167603,1373.252686,-77.391273,15924.202148,676.150635,354.912354,122.748947,FALSE,-21.883082287383,-27.3792286517838,"2"
export_AJP SEB_A5_A05_CD8 _2020-06-15,247.470688,141.270645,520.304749,250.447678,1082.057983,1050.729004,-12.965743,22266.611328,2428.005127,241.77121,344.769562,FALSE,-27.0053504460042,-23.7422300433539,"2"
export_AJP SEB_A5_A05_CD8 _2020-06-15,-2.143861,96.980408,316.262848,114.575096,182.979538,790.904358,55.748215,3835.375488,197.959854,295.982147,5807.691895,FALSE,-8.84194033942477,-17.3375789828091,"14"
export_AJP SEB_A5_A05_CD8 _2020-06-15,736.190735,139.139465,2019.816895,343.752655,92.323997,760.59198,-21.320698,2376.976074,562.763794,598.608704,5738.63623,FALSE,-7.32816345062675,-5.41644443914742,"16"
export_AJP SEB_A5_A05_CD8 _2020-06-15,13258.056641,246.96933,1192.364624,1413.366577,2459.824219,171.550354,-26.720236,813.330017,551.335327,10057.149414,-240.96666,FALSE,31.5551287049825,34.1701217308822,"23"
export_AJP SEB_A5_A05_CD8 _2020-06-15,152.724243,129.841629,286.826416,399.555817,824.612122,1378.281372,-8.595139,7386.689453,830.106567,5.278428,260.438324,FALSE,-10.2234932666711,-31.9077619932643,"2"
export_AJP SEB_A5_A05_CD8 _2020-06-15,1389.715698,150.111176,303.148376,271.467438,805.430542,443.488403,81.243988,6242.704102,3389.397705,201.109283,514.809082,FALSE,-7.98575589660333,-3.57713721696376,"15"
export_AJP SEB_A5_A05_CD8 _2020-06-15,-8.008361,147.064255,458.055481,328.510712,525.886841,478.493073,217.486069,256.799286,1094.095581,400.834717,242.798264,FALSE,2.17735935423318,-15.1908566941272,"16"
export_AJP SEB_A5_A05_CD8 _2020-06-15,521.300659,184.87854,176.333511,449.873291,1274.848511,888.877319,388.028198,5168.179688,13938.361328,375.756683,3525.541504,FALSE,-39.867282930842,10.9888078200452,"7"
export_AJP SEB_A5_A05_CD8 _2020-06-15,-299.183594,33.480492,609.974548,120.924988,645.311035,569.637451,-40.240746,208.298737,943.067749,547.965454,1152.22168,FALSE,0.858581969996874,-21.9016088127529,"16"
export_AJP SEB_A5_A05_CD8 _2020-06-15,1429.57959,48.353142,609.500977,442.635559,400.953247,772.424561,-64.138451,15044.078125,208.429581,970.442932,39.538094,FALSE,-17.5871619213619,-17.5280260397417,"15"
export_AJP SEB_A5_A05_CD8 _2020-06-15,1436.212646,91.662842,668.400146,160.03389,160.265259,1470.768433,152.567032,3475.037598,2488.383301,152.677841,6430.018555,FALSE,-26.7433410520382,-17.4190301126818,"24"
export_AJP SEB_A5_A05_CD8 _2020-06-15,7731.624023,137.388672,307.415955,1323.882324,2025.22937,72.844315,-42.434025,488.376617,134.283859,2402.98877,123.30809,FALSE,35.1502052826203,26.7246586401447,"23"
export_AJP SEB_A5_A05_CD8 _2020-06-15,3552.159424,82.481857,1170.62793,368.772675,2346.206543,582.492004,6.219948,13494.447266,847.812195,490.158508,75.332169,FALSE,19.5693721241077,14.1134008681841,"15"
export_AJP SEB_A5_A05_CD8 _2020-06-15,112.255852,108.45005,235.527771,303.262726,1120.133911,540.170837,92.555794,1046.413818,844.283081,714.944153,338.658966,FALSE,4.28785088731039,-22.7586631962948,"11"
export_AJP SEB_A5_A05_CD8 _2020-06-15,504.098511,21.697844,216.038727,167.522598,597.944824,-58.307404,-41.466717,1503.298096,148.202118,493.238647,21370.599609,FALSE,-6.72620438896509,47.1808818204646,"22"
export_AJP SEB_A5_A05_CD8 _2020-06-15,1054.874756,123.146828,342.056854,173.52063,61.220772,530.297119,206.869873,1260.998291,54.140984,1731.027344,203.069778,FALSE,0.250768293756085,-12.5192036581199,"16"
export_AJP SEB_A5_A05_CD8 _2020-06-15,9913.412109,62.372513,93.109886,640.117126,1042.6875,44.675388,62.003361,-266.201935,625.437683,46.848202,224.242249,FALSE,32.2669908510458,31.7011922782458,"23"
export_AJP SEB_A5_A05_CD8 _2020-06-15,525.245544,71.300774,757.952454,265.192932,248.836136,772.457642,-64.376663,1758.990479,234.528183,1244.552246,245.984024,FALSE,-2.67552278631396,-21.067076480114,"16"
export_AJP SEB_A5_A05_CD8 _2020-06-15,-83.357277,175.602188,271.207336,216.087234,2028.563232,512.595642,-22.091631,4535.630859,445.322418,334.101685,3537.874512,FALSE,2.08588173418841,-18.0286272057871,"10"
export_AJP SEB_A5_A05_CD8 _2020-06-15,392.512878,200.206253,293.996124,460.768219,139.008881,1467.000244,66.167435,61.161606,897.014038,1703.83606,134.981903,FALSE,-8.7950837801918,-32.7895692008149,"24"
export_AJP SEB_A5_A05_CD8 _2020-06-15,148.18898,31.160639,311.652252,725.60376,893.721252,581.490906,-43.845448,3180.976563,1955.52063,219.132477,100.703339,FALSE,1.39507316018054,-24.1828148993175,"11"
export_AJP SEB_A5_A05_CD8 _2020-06-15,55.264996,175.428802,842.465637,352.697876,973.641663,1547.820435,158.396683,8895.208008,568.165161,79.450943,1695.361694,FALSE,-14.2802694928468,-33.023692480178,"2"
export_AJP SEB_A5_A05_CD8 _2020-06-15,1464.555054,201.443573,496.213715,151.028778,-45.861454,254.962875,134.051376,6766.811523,592.594543,187.37323,404.782257,FALSE,-1.38901392212788,-1.18438202938087,"15"
export_AJP SEB_A5_A05_CD8 _2020-06-15,737.014038,164.078873,651.225891,210.021118,109.282455,495.156982,98.542595,4592.611816,319.681305,285.319366,1644.318359,FALSE,-5.73818951277369,-15.178431635959,"16"
export_AJP SEB_A5_A05_CD8 _2020-06-15,611.60498,200.093307,469.047485,-11.377513,2017.747559,1199.753662,-499.359497,6000.070801,472.167267,38130.464844,-291.933167,FALSE,32.4465340121576,-37.7335695915304,"25"
export_AJP SEB_A5_A05_CD8 _2020-06-15,258.380493,251.742279,592.166504,474.628113,262.90332,2596.050049,-44.290672,6335.803711,2055.227783,1296.137939,417.354675,FALSE,-21.2914193360086,-36.5329779554589,"24"
export_AJP SEB_A5_A05_CD8 _2020-06-15,2745.682129,262.705322,177.208862,91.143723,102.761421,38.368877,18.992538,5071.52002,16.231653,878.164795,-5.65362,FALSE,16.055571142781,11.6160435259718,"15"
export_AJP SEB_A5_A05_CD8 _2020-06-15,-1720.820923,171.867233,315.023163,62.884472,529.236328,533.642151,35.752949,223.16275,4.864024,3661.325195,53664.289063,FALSE,-8.91318747660721,57.3049846792591,"22"
export_AJP SEB_A5_A05_CD8 _2020-06-15,-391.237915,104.951912,639.680847,180.246338,292.60675,1976.167114,55.089771,7823.949707,254.894073,1044.296997,226.491837,FALSE,-17.5031791493112,-33.6539175397209,"24"
export_AJP SEB_A5_A05_CD8 _2020-06-15,224.54129,58.875626,1066.30127,217.971146,211.948578,589.832703,9.754768,4351.113281,467.327454,260.678986,1809.209229,FALSE,-5.2073992012192,-17.9635545429404,"16"
export_AJP SEB_A5_A05_CD8 _2020-06-15,3136.817139,101.472656,-10.489594,595.463928,1087.622314,60.082748,-7.185877,6083.586426,3025.868652,126.654343,172.633148,FALSE,17.8847651562671,13.5612367623518,"15"
export_AJP SEB_A5_A05_CD8 _2020-06-15,1597.37793,120.876541,572.451965,211.283768,128.625702,357.82785,37.900539,164.353516,102.655998,1698.886719,1682.064087,FALSE,12.0047069774856,3.81960910198119,"9"
export_AJP SEB_A5_A05_CD8 _2020-06-15,263.679047,-0.595109,322.734802,157.598724,234.874176,147.202423,-2.47937,-200.172684,175.304123,501.146606,874.397034,FALSE,4.6884901850926,-7.43568655751792,"9"
export_AJP SEB_A5_A05_CD8 _2020-06-15,91.544395,148.798721,892.010132,1429.037598,734.833191,849.970398,24.443838,26134.734375,244.877045,572.624084,711.405334,FALSE,-30.0180494998392,-23.3383287992527,"3"
export_AJP SEB_A5_A05_CD8 _2020-06-15,43.588425,116.376663,647.806458,109.448616,406.969177,733.522461,-14.783447,474.066223,555.786011,723.659302,592.273376,FALSE,-1.5894416500267,-23.0461981440612,"16"
export_AJP SEB_A5_A05_CD8 _2020-06-15,8364.521484,6939.724121,204.743652,1233.26062,1227.812134,245.36882,53.63295,542.838013,9.103549,1379.178345,847.839294,FALSE,41.9774127617741,33.7105996202579,"28"
export_AJP SEB_A5_A05_CD8 _2020-06-15,760.416687,81.335754,244.955215,130.551483,-38.556831,430.790283,-15.692001,3572.336182,9.349958,1176.56189,396.503723,FALSE,-2.86075149780111,-14.4663627283113,"16"
export_AJP SEB_A5_A05_CD8 _2020-06-15,10548.586914,89.486565,216.190781,36.611809,211.816391,354.29364,24.597124,286.372437,-17.312723,1385.549805,670.120544,FALSE,27.87382508925,30.7354813889072,"5"
export_AJP SEB_A5_A05_CD8 _2020-06-15,1474.592163,77.869644,530.96106,85.195404,127.906815,251.850403,1.954885,17763.068359,104.263222,1231.118774,403.052795,FALSE,-19.5283835656013,-13.241082982924,"6"
export_AJP SEB_A5_A05_CD8 _2020-06-15,1234.274536,105.725899,452.555573,284.721405,330.932373,70.609528,0.906127,2536.046631,22.057285,1713.180542,466.877808,FALSE,11.6066376543773,1.40452018412927,"6"
export_AJP SEB_A5_A05_CD8 _2020-06-15,844.94696,174.809036,3045.7229,387.81662,105.681458,58.167168,0.068085,4501.314453,181.663315,1040.660645,13905.847656,FALSE,-3.91990206056188,35.5800721279632,"6"
export_AJP SEB_A5_A05_CD8 _2020-06-15,-413.817261,73.145027,393.904297,170.089249,155.048508,226.92688,-29.608942,369.625702,-113.198425,575.721313,761.423218,FALSE,3.47711331298745,-12.8878424047198,"9"
export_AJP SEB_A5_A05_CD8 _2020-06-15,-654.281677,165.875275,413.680023,367.336212,645.185181,1737.728394,-50.747528,14987.25,1356.824951,533.345215,286.693085,FALSE,-23.1321740168144,-30.4312263526117,"2"
export_AJP SEB_A5_A05_CD8 _2020-06-15,2480.274414,265.141846,1195.2052,687.448547,2027.495117,194.969177,212.322296,12122.65918,752.741028,1122.394409,231.020462,FALSE,12.6938001255675,3.85111006478937,"15"
export_AJP SEB_A5_A05_CD8 _2020-06-15,-211.313232,191.72525,264.01123,420.823059,248.469238,288.302612,151.348572,1974.537354,1761.077026,-184.583603,321.306427,FALSE,0.81689945820888,-9.82293157214546,"9"
export_AJP SEB_A5_A05_CD8 _2020-06-15,-677.968567,155.143906,386.783356,159.857391,203.278961,170.788376,38.190926,251.525681,80.820938,158.58461,1918.453003,FALSE,2.63550073230034,-5.40907884399294,"9"
export_AJP SEB_A5_A05_CD8 _2020-06-15,3165.054199,151.68222,1094.764526,763.473083,623.611633,141.187302,119.343468,8222.716797,790.196838,737.6651,82.337914,TRUE,14.3777568659943,19.3710593622957,"15"
export_AJP SEB_A5_A05_CD8 _2020-06-15,1524.549683,234.514023,268.492523,511.452606,1398.631714,161.852478,174.553574,3093.640381,565.766602,92.736153,354.828247,FALSE,16.4417742877402,0.402992297129866,"11"
export_AJP SEB_A5_A05_CD8 _2020-06-15,8307.125977,34.522106,195.429626,1889.103271,1598.642456,102.42131,-1.153026,-177.574951,600.415894,121.672188,170.847702,FALSE,34.7394507211501,27.1274738023931,"23"
export_AJP SEB_A5_A05_CD8 _2020-06-15,1217.571167,197.65889,3188.324463,1257.69751,3257.088623,280.479523,390.967987,26719.798828,486.818207,1008.841431,228.984879,TRUE,-31.9585850071835,-21.9681265245261,"24"
export_AJP SEB_A5_A05_CD8 _2020-06-15,10578.206055,139.751205,364.615784,167.148178,35.092098,113.273781,10.906863,3888.494141,153.150192,463.38324,822.523926,FALSE,26.1655742154975,30.5742558203997,"5"
export_AJP SEB_A5_A05_CD8 _2020-06-15,1015.06842,143.348557,1707.572388,277.620087,600.473938,1363.609497,-17.372475,2031.165527,678.578308,1536.280151,126.337814,FALSE,-9.01967990096536,-28.0395656523977,"24"
export_AJP SEB_A5_A05_CD8 _2020-06-15,1863.696777,141.469162,168.345856,150.544678,167.779953,99.954948,146.331619,3386.734863,1719.586304,161.437241,43.542049,FALSE,9.38046814902328,5.78919202731049,"9"
export_AJP SEB_A5_A05_CD8 _2020-06-15,963.585083,81.364441,263.650757,103.931244,-34.615875,380.83844,-42.17223,3054.865723,-28.990711,1585.365112,133.953857,FALSE,0.0637537410368189,-9.21223690449178,"16"
export_AJP SEB_A5_A05_CD8 _2020-06-15,12011.398438,133.610107,180.345367,1009.02179,1995.103516,29.381935,-52.621143,33.567188,548.807495,1128.579224,289.216919,FALSE,32.3628289110433,32.5688429403965,"23"
export_AJP SEB_A5_A05_CD8 _2020-06-15,-40.492176,84.035042,873.176147,72.254585,463.154877,1433.203369,92.195763,1050.549438,225.954056,286.048004,1375.4104,FALSE,-10.9513864055317,-30.8311736286116,"24"
export_AJP SEB_A5_A05_CD8 _2020-06-15,1427.241455,149.935074,445.525696,221.673691,209.156982,337.978424,112.904724,1692.062378,301.268097,364.861786,8622.499023,FALSE,0.830000872565737,27.4475670482546,"14"
export_AJP SEB_A5_A05_CD8 _2020-06-15,857.470215,169.612503,266.063782,572.875977,1864.0802,1410.303223,41.570522,12143.896484,732.940735,-30.473225,430.764465,FALSE,-13.4523587620957,-35.4453424457865,"2"
export_AJP SEB_A5_A05_CD8 _2020-06-15,411.212158,112.103264,1109.905518,142.905746,827.383667,989.981934,15.567999,5431.391113,555.241516,1046.680176,183.29245,FALSE,-5.95624336154486,-26.4940156897102,"24"
export_AJP SEB_A5_A05_CD8 _2020-06-15,2.890499,65.196281,160.131378,106.89212,109.691978,958.765625,51.692844,773.114258,103.100555,329.187347,1962.781128,FALSE,-5.43749758593621,-26.8860703879407,"16"
export_AJP SEB_A5_A05_CD8 _2020-06-15,302.716492,59.1432,404.334412,577.147583,162.170456,226.686523,44.006718,1913.050659,138.84375,827.536621,757.480164,FALSE,2.67212812662304,-12.8482949197119,"11"
export_AJP SEB_A5_A05_CD8 _2020-06-15,-92.704079,209.197128,2350.274902,256.791229,344.41629,2012.316284,24.981689,192.379211,1271.477173,822.03363,7631.679199,FALSE,-16.1569277703208,-28.4767187737816,"24"
export_AJP SEB_A5_A05_CD8 _2020-06-15,158.001907,144.252823,282.59726,153.098312,965.571472,1170.955688,-55.297985,4025.312988,702.963196,-119.188393,261.845154,FALSE,-6.96249799676477,-30.1903113986792,"16"
export_AJP SEB_A5_A05_CD8 _2020-06-15,469.961761,-8.831367,845.52301,235.598434,726.018799,775.691101,156.490479,1301.507202,461.709839,991.869873,3545.455811,FALSE,-4.64462152587834,-22.7924184207016,"10"
export_AJP SEB_A5_A05_CD8 _2020-06-15,99.437614,98.963364,-48.144512,120.138687,-193.97226,34.326542,-74.815033,736.566833,-84.181503,1010.706299,410.326569,FALSE,4.01574651686825,-7.60922897528772,"25"
export_AJP SEB_A5_A05_CD8 _2020-06-15,-496.201782,68.229347,299.590607,477.999786,612.870178,183.675964,11.8292,2140.161621,707.259949,-163.667114,342.69104,TRUE,9.78621924267535,-11.8562799547265,"11"
export_AJP SEB_A5_A05_CD8 _2020-06-15,-860.429382,137.630707,376.834503,104.041046,951.913879,1175.889404,12.505238,290.893097,-67.200714,4.719828,1047.569336,FALSE,-6.59739520412958,-30.6281509340292,"16"
export_AJP SEB_A5_A05_CD8 _2020-06-15,432.760162,192.948074,596.318848,282.593994,1345.583862,256.1073,89.179634,3334.328369,223.204498,259.9375,4724.618652,FALSE,3.23620041035329,12.4648454502322,"11"
export_AJP SEB_A5_A05_CD8 _2020-06-15,12111.807617,180.039017,411.027008,903.204529,1661.416626,32.734261,147.089142,382.107391,801.381531,478.178772,366.706696,FALSE,32.2459528822711,33.5288857681006,"23"
export_AJP SEB_A5_A05_CD8 _2020-06-15,-393.453918,38.751564,2539.321533,269.11084,478.347443,3285.922363,63.609257,397.596466,1093.387207,1107.282227,286.666229,FALSE,-23.1721919946331,-35.5246092271568,"24"
export_AJP SEB_A5_A05_CD8 _2020-06-15,2443.792969,243.263992,1151.112549,1312.819092,1694.573608,1457.222778,81.998856,16444.525391,1418.115967,1062.337524,192.268692,FALSE,-13.762292364569,-31.6245982112022,"2"
export_AJP SEB_A5_A05_CD8 _2020-06-15,-458.034546,128.20491,539.769836,780.951172,902.682495,223.429886,29.474232,187.881424,182.85405,780.774902,15326.912109,FALSE,-4.83271925301459,40.5901498671235,"14"
export_AJP SEB_A5_A05_CD8 _2020-06-15,-198.965454,227.955353,475.813843,171.592346,-120.836662,93.271667,1.433524,3481.062744,609.821777,406.948486,118.909897,FALSE,-0.61352442341469,-9.85702290153151,"6"
export_AJP SEB_A5_A05_CD8 _2020-06-15,-416.258698,103.636047,715.894287,292.247986,842.743774,2189.460205,-96.708961,6522.493652,1086.177612,128.793701,414.072998,TRUE,-22.6910335562825,-38.7886525910448,"24"
export_AJP SEB_A5_A05_CD8 _2020-06-15,-1475.751953,117.178101,351.012909,86.762344,389.439758,248.922333,24.950516,1813.585449,416.715576,823.875549,13223.602539,FALSE,-2.18960742526395,34.9350778286382,"14"
export_AJP SEB_A5_A05_CD8 _2020-06-15,-572.897888,54.921963,-197.438354,105.123871,385.936005,147.344589,155.745071,-510.708008,11252.021484,208.301697,6012.797852,FALSE,-27.1017058469816,22.1071896772299,"19"
export_AJP SEB_A5_A05_CD8 _2020-06-15,-291.257172,176.888199,356.943634,158.131805,503.978638,1728.325562,72.263245,6009.043457,793.511475,14.972449,209.407349,FALSE,-14.1896421142181,-33.3502543630645,"24"
export_AJP SEB_A5_A05_CD8 _2020-06-15,-289.009644,100.644653,209.226471,107.549477,940.666809,1441.64209,14.822838,3532.001709,36.648174,881.20166,332.138123,FALSE,-10.1976807911706,-33.4536977573865,"13"
export_AJP SEB_A5_A05_CD8 _2020-06-15,1345.434814,267.433411,2190.452393,420.544464,1934.22937,1552.864136,158.661453,762.453125,602.929871,2730.47876,1070.625122,FALSE,-11.8962182874648,-36.5202402281134,"15"
export_AJP SEB_A5_A05_CD8 _2020-06-15,273.984863,168.425537,770.954102,85.888603,94.266747,944.122742,126.019798,4114.462402,307.360229,477.854584,1000.821289,FALSE,-6.54524299737851,-24.087627113649,"16"
export_AJP SEB_A5_A05_CD8 _2020-06-15,563.00769,172.008057,590.553589,275.239929,328.553406,232.619858,-23.231689,-150.510696,1089.192871,310.163605,271.071594,FALSE,6.95315052773844,-6.13517433052379,"9"
export_AJP SEB_A5_A05_CD8 _2020-06-15,1592.147949,38.572121,279.367676,172.457306,1196.380859,1188.771851,-61.277626,43352.445313,623.412598,162.94989,204.137085,FALSE,-32.7735369827934,-21.7406110724739,"3"
export_AJP SEB_A5_A05_CD8 _2020-06-15,9199.34668,219.255371,187.850388,1493.055298,1452.86792,2.123263,38.693157,-105.928658,136.13324,916.655212,937.495605,FALSE,33.2186841418055,29.4289771037645,"23"
export_AJP SEB_A5_A05_CD8 _2020-06-15,341.538605,162.704178,304.307556,247.930023,1321.744629,162.519409,222.475876,2843.112793,5579.379883,400.622406,21170.130859,FALSE,-11.8325392566021,42.6324145445156,"22"
export_AJP SEB_A5_A05_CD8 _2020-06-15,830.75531,180.360916,580.819214,386.938232,1307.022949,1512.842773,123.695152,13570.383789,685.977966,242.687149,292.928741,FALSE,-17.3687247115103,-33.0419468146005,"2"
export_AJP SEB_A5_A05_CD8 _2020-06-15,1345.782471,136.311005,385.167511,254.119186,457.381104,379.328186,7.768808,4588.124023,2266.232666,304.351929,19816.115234,FALSE,-8.63353296327701,42.941398643886,"22"
export_AJP SEB_A5_A05_CD8 _2020-06-15,132.259399,11.464811,299.783966,99.647888,487.999878,464.368835,6.920939,1271.388794,645.645264,287.639099,195.259338,FALSE,0.679660892285518,-19.1605070580015,"16"
export_AJP SEB_A5_A05_CD8 _2020-06-15,6842.467285,157.985382,2275.008301,435.360748,1136.291504,-3.029012,627.167542,5799.066406,143.510864,1970.705078,118582.09375,FALSE,-13.4491749637653,64.8214289810926,"22"
export_AJP SEB_A5_A05_CD8 _2020-06-15,855.514587,46.073803,840.676392,154.13858,188.052643,959.82373,74.668442,3555.432617,765.383911,303.90564,40.259403,FALSE,-7.20939092416867,-22.671639884005,"16"
export_AJP SEB_A5_A05_CD8 _2020-06-15,342.519501,86.456612,262.328003,54.169075,972.207703,1788.446777,60.207588,19234.101563,852.793213,-25.046236,122.618477,FALSE,-26.0810651170007,-30.1855148863592,"2"
export_AJP SEB_A5_A05_CD8 _2020-06-15,-351.97995,91.273949,576.119934,237.664719,1013.879944,1610.269043,-1.633252,3303.351074,1088.246216,334.781067,1091.378418,FALSE,-12.043266164481,-34.3910858846479,"13"
export_AJP SEB_A5_A05_CD8 _2020-06-15,8476.462891,332.213409,901.452942,466.626892,1593.022095,471.764832,127.023605,-111.653702,596.956604,190.165878,429.440704,FALSE,32.4621816877028,27.2141499163075,"23"
export_AJP SEB_A5_A05_CD8 _2020-06-15,443.553925,3.573185,225.887054,335.487701,115.723717,148.533005,-50.380241,443.774109,1028.375732,132.004395,147.39949,FALSE,5.99399306548427,-6.28965755467825,"9"
export_AJP SEB_A5_A05_CD8 _2020-06-15,1223.708496,103.68354,264.055267,208.362991,3.854242,65.114883,122.577103,3643.712646,953.334045,303.699829,3088.266357,FALSE,7.33026816480804,10.5646752203385,"6"
export_AJP SEB_A5_A05_CD8 _2020-06-15,2073.762939,146.126938,554.365723,116.549965,202.868835,1016.45459,94.010193,1875.856445,721.881714,313.551056,13108.518555,FALSE,-7.837028635265,26.0252673886427,"14"
export_AJP SEB_A5_A05_CD8 _2020-06-15,1374.144409,175.456665,1552.669922,324.732697,944.893311,2187.068359,-14.162804,6551.79834,729.100586,3442.224609,254.794601,FALSE,-19.197539729851,-35.5670945523749,"24"
export_AJP SEB_A5_A05_CD8 _2020-06-15,-75.907295,90.334396,1227.338989,79.848419,450.894775,2150.124756,-64.9935,5424.461426,1408.925171,96.801102,975.025696,FALSE,-17.6491661850301,-32.4678690559948,"24"
export_AJP SEB_A5_A05_CD8 _2020-06-15,384.079193,114.860107,234.550537,1451.58313,70.727959,579.388794,-97.292488,226.886215,230.6091,1597.105835,143.002716,FALSE,3.11988392708501,-20.3868749197751,"16"
export_AJP SEB_A5_A05_CD8 _2020-06-15,252.609741,304.826233,613.670166,357.81839,628.16864,248.527496,-82.361549,385.831665,234.707718,1893.653687,820.878174,FALSE,6.5829336809898,-16.2084606801047,"11"
export_AJP SEB_A5_A05_CD8 _2020-06-15,-172.728577,69.969376,394.470337,45.506367,208.452316,1469.325684,-21.50795,2694.404297,227.760574,634.639038,11678.4375,FALSE,-21.4220943687186,-6.23410770216218,"14"
export_AJP SEB_A5_A05_CD8 _2020-06-15,502.231079,257.180328,557.84552,34.198814,854.098999,352.644867,-831.128906,512.329163,298.37616,35715.582031,-200.536194,FALSE,32.8697959754866,-37.4558788152058,"25"
export_AJP SEB_A5_A05_CD8 _2020-06-15,761.091675,249.143204,255.805283,102.753281,-101.153008,229.607254,-4.552402,1406.816162,725.354431,246.354568,157.598648,FALSE,5.16154996469142,-3.92339705545064,"9"
export_AJP SEB_A5_A05_CD8 _2020-06-15,241.576477,34.213165,636.312622,349.852631,1009.547241,483.73996,-21.758209,14875.450195,564.840881,77.088425,1178.560669,FALSE,-17.0979039654158,-17.3888909144823,"2"
export_AJP SEB_A5_A05_CD8 _2020-06-15,5459.541016,140.970901,768.981628,658.834229,2952.211914,171.87175,47.551514,-220.472809,305.960571,4225.866699,-159.068512,FALSE,37.00381057968,22.1441383052212,"12"
export_AJP SEB_A5_A05_CD8 _2020-06-15,672.033081,66.96978,589.308594,128.497818,113.906624,94.452621,76.854622,3265.148193,55.176373,932.237183,30.957912,FALSE,2.63951702205701,-5.47505699415796,"6"
export_AJP SEB_A5_A05_CD8 _2020-06-15,700.428772,147.37352,440.442383,363.007813,880.532471,472.440338,-3.959363,3957.509521,51.344101,975.404053,277.525909,FALSE,-0.980027910931636,-21.37140086913,"11"
export_AJP SEB_A5_A05_CD8 _2020-06-15,98.609604,78.667007,93.910057,193.722748,555.513367,368.557526,-178.77359,3428.608398,4030.340332,35.243149,138.645569,FALSE,-10.2642629134235,-2.83506152324279,"6"
export_AJP SEB_A5_A05_CD8 _2020-06-15,114.549202,45.9776,186.014709,297.443756,612.503601,232.531937,7.041571,5095.520996,66.241692,313.204193,1965.902344,FALSE,-1.93505809518913,-14.3326770920634,"11"
export_AJP SEB_A5_A05_CD8 _2020-06-15,329.54538,5.87241,1279.304688,318.027527,1466.654053,3187.273926,16.319799,14476.455078,2044.656372,572.706726,12534.580078,FALSE,-31.0247629042521,-34.6192604581626,"24"
export_AJP SEB_A5_A05_CD8 _2020-06-15,8514,116.950005,268.772583,1455.005005,1508.672852,19.815878,17.105776,-131.710144,28.305689,963.90564,33.212009,FALSE,33.9045224477749,27.4519538568601,"23"
export_AJP SEB_A5_A05_CD8 _2020-06-15,232.615677,57.886372,360.489532,206.362289,210.036057,2686.24707,454.502838,5143.208008,925.487366,262.587067,2567.759033,FALSE,-18.1972433651135,-32.5241089993645,"24"
export_AJP SEB_A5_A05_CD8 _2020-06-15,769.669434,97.474739,794.606079,313.579163,62.774792,267.288025,107.93158,12356.826172,377.138367,276.298401,3024.160645,TRUE,-20.124301825123,-15.7734533687871,"6"
export_AJP SEB_A5_A05_CD8 _2020-06-15,-103.233208,22.613728,363.279083,911.644348,403.578674,2133.999512,108.545792,4038.150879,3716.236084,519.93927,11172.094727,FALSE,-33.2592124249614,-15.2187512938399,"24"
export_AJP SEB_A5_A05_CD8 _2020-06-15,1800.878052,89.18132,261.213562,131.071259,93.652855,388.340942,84.552383,1048.06543,300.000763,351.180786,9591.688477,FALSE,0.219320424894946,29.4935225726722,"14"
export_AJP SEB_A5_A05_CD8 _2020-06-15,311.153198,152.328979,596.088379,125.077232,244.836151,430.660278,79.869232,3068.422852,71.516701,283.250092,880.232117,FALSE,-2.51552258491838,-16.534090222748,"16"
export_AJP SEB_A5_A05_CD8 _2020-06-15,5298.896484,159.787109,1161.732544,462.21698,545.62677,1412.185913,308.653717,12601.057617,7952.653809,255.066437,237.64798,FALSE,-7.88615453849319,14.0287786259816,"4"
export_AJP SEB_A5_A05_CD8 _2020-06-15,-148.266693,215.919952,2878.986816,150.022018,1619.316528,1987.481079,18.352404,1461.505127,207.370438,901.476135,1424.600098,FALSE,-17.9615753210295,-35.6279332650425,"24"
export_AJP SEB_A5_A05_CD8 _2020-06-15,417.2547,82.746925,318.746918,140.172256,-34.364185,-13.304638,-92.852005,6306.382813,1550.576782,144.421036,216.002563,FALSE,-4.06231743375777,-5.62374640922948,"6"
export_AJP SEB_A5_A05_CD8 _2020-06-15,2558.872803,170.073837,467.51709,210.259949,1869.898804,388.849579,-67.737648,-13.910765,535.040894,8779.756836,342.390625,FALSE,26.1626337454391,-12.2429407718778,"12"
export_AJP SEB_A5_A05_CD8 _2020-06-15,228.412842,159.77092,501.015686,259.179962,212.206635,283.085144,97.027588,564.415771,114.804878,931.77832,404.339417,TRUE,3.9231332470695,-17.6325663195838,"9"
export_AJP SEB_A5_A05_CD8 _2020-06-15,1647.665161,118.997604,413.58725,400.141052,1105.032715,181.90596,-15.838592,3834.906738,1354.257813,502.825989,-49.934612,FALSE,15.3697210865956,3.20175848005521,"18"
export_AJP SEB_A5_A05_CD8 _2020-06-15,1749.573853,107.120773,294.250519,189.764984,121.274033,68.576866,89.413536,1790.829468,660.833008,314.138519,173.264145,FALSE,14.5200815310603,5.16630178214879,"9"
export_AJP SEB_A5_A05_CD8 _2020-06-15,175.376297,141.399429,4876.200684,371.180695,663.621155,580.005676,59.921345,12888.554688,422.571014,1929.74585,265.204468,FALSE,-13.8142819129673,-10.4605894853686,"24"
export_AJP SEB_A5_A05_CD8 _2020-06-15,902.264465,117.062119,386.306671,-147.466614,2789.687012,455.640808,-661.035156,247.295624,-113.41111,43941.378906,-366.416534,TRUE,37.4303559490981,-38.2583251335103,"27"
export_AJP SEB_A5_A05_CD8 _2020-06-15,742.487671,64.804489,838.625488,138.796188,849.993591,166.269058,-2.59271,859.56427,270.001831,1798.163696,382.308319,FALSE,9.83735593412251,-6.66039289637977,"11"
export_AJP SEB_A5_A05_CD8 _2020-06-15,5576.226563,98.800667,1031.090698,685.859497,1106.769409,354.683105,182.613373,1736.453125,651.642456,267.940643,316.676086,FALSE,27.7405034735755,19.288372649666,"18"
export_AJP SEB_A5_A05_CD8 _2020-06-15,2050.342773,75.553055,416.528687,1068.381104,724.087585,498.787201,-24.119349,19595.890625,1166.547363,194.291046,391.936981,FALSE,-21.6665195720825,-16.8065666023141,"6"
export_AJP SEB_A5_A05_CD8 _2020-06-15,5063.07666,48.336781,157.099396,662.250916,524.411255,115.086075,18.225389,-115.276489,628.906067,387.750031,151.220352,FALSE,26.5930971632505,17.5972903868133,"18"
export_AJP SEB_A5_A05_CD8 _2020-06-15,9019.048828,80.659698,359.821075,382.933807,1403.579834,49.333706,68.912827,3240.55957,1405.528198,328.958344,130.558929,FALSE,31.5468420872386,31.4765573086393,"23"
export_AJP SEB_A5_A05_CD8 _2020-06-15,409.843567,191.768723,348.11026,88.069191,419.236847,435.282288,-35.565536,1207.028198,358.593109,3670.657471,322.607727,FALSE,4.13202816591954,-23.0353605599252,"25"
export_AJP SEB_A5_A05_CD8 _2020-06-15,829.064636,196.659851,323.13916,176.251068,119.896194,1224.410278,36.558407,5476.171875,551.273682,185.11528,55.594105,FALSE,-9.72349070229449,-26.1894969328571,"16"
export_AJP SEB_A5_A05_CD8 _2020-06-15,258.691681,182.603867,489.092926,148.10173,827.490967,1479.716553,-15.733182,37617.910156,-20.374035,294.904266,15222.311523,FALSE,-36.2267404102002,-21.4046039876112,"1"
export_AJP SEB_A5_A05_CD8 _2020-06-15,133.073776,120.112251,512.939819,328.666718,111.580505,227.684158,-125.889771,2368.593994,328.887238,3008.44873,189.735428,FALSE,4.05296574528604,-18.6431868513501,"25"
export_AJP SEB_A5_A05_CD8 _2020-06-15,209.511963,90.966507,413.615051,436.654907,1115.579346,1365.961426,49.724564,13744.256836,296.790436,323.07547,745.801208,FALSE,-17.3012450038009,-30.4736632703319,"2"
export_AJP SEB_A5_A05_CD8 _2020-06-15,793.694214,154.264038,558.282349,-140.601501,1946.14624,1130.162231,-512.71991,-407.94165,180.586517,46500.730469,-48.888714,TRUE,38.2637187190594,-39.1564552885588,"27"
export_AJP SEB_A5_A05_CD8 _2020-06-15,17187.746094,183.973267,1050.72229,1419.337646,1969.980835,766.689148,128.347305,1.238991,2444.520508,981.522034,900.243713,FALSE,29.2650038635329,33.2565980433831,"5"
export_AJP SEB_A5_A05_CD8 _2020-06-15,9933.750977,118.459656,360.242401,680.519775,1176.391602,-2.75248,-54.609097,-65.91864,401.214478,10086.46582,718.627991,FALSE,30.4048513518424,30.1718517254312,"12"
export_AJP SEB_A5_A05_CD8 _2020-06-15,631.599976,115.769806,433.919708,352.455414,335.956787,577.798889,-38.762455,-219.587357,219.417511,5061.736816,467.398285,TRUE,9.43486933975875,-28.381133809663,"25"
export_AJP SEB_A5_A05_CD8 _2020-06-15,-46.124023,147.850311,248.869965,153.026764,378.983246,1617.381958,-26.897711,6481.886719,7071.551758,403.960754,440.084503,FALSE,-33.3750810471259,-5.68911082049587,"7"
export_AJP SEB_A5_A05_CD8 _2020-06-15,312.288757,61.576191,966.688599,262.156067,611.708313,1564.09729,-43.384457,1902.517334,1313.372681,502.925049,909.220398,FALSE,-10.9055738043641,-31.7658292995983,"24"
export_AJP SEB_A5_A05_CD8 _2020-06-15,401.612854,297.246979,663.657349,537.412231,2320.06958,2355.945068,53.472897,155.976379,478.073517,4841.833008,568.859375,FALSE,-19.0678103625228,-44.6747372315091,"24"
export_AJP SEB_A5_A05_CD8 _2020-06-15,-489.84845,208.286133,658.627197,3.458869,1672.702271,576.994446,-761.660583,2049.275146,409.545563,37305.828125,-313.579193,FALSE,32.7071176130143,-35.1822047123698,"25"
export_AJP SEB_A5_A05_CD8 _2020-06-15,356.858093,130.911041,244.109161,185.035965,348.637451,1001.596313,112.821495,130.277695,19.912056,639.901001,994.420166,FALSE,-5.03663847506176,-28.3675599026495,"16"
export_AJP SEB_A5_A05_CD8 _2020-06-15,551.37616,214.599335,391.748596,109.946602,97.155426,460.528107,-235.986389,8023.394043,46.657173,16475.144531,-513.872314,FALSE,20.6974812765939,-38.0142523405322,"25"
export_AJP SEB_A5_A05_CD8 _2020-06-15,-9.56677,137.494797,360.545227,117.31749,1040.277222,844.672424,98.72007,21.799135,137.996704,323.25882,868.297974,FALSE,-1.82195377533861,-27.4473274169892,"16"
export_AJP SEB_A5_A05_CD8 _2020-06-15,-150.580536,53.859634,262.411224,188.839798,70.526115,900.980896,-52.539265,53.697304,146.15451,349.983398,1118.864624,FALSE,-3.87562418861696,-24.8130422522627,"16"
export_AJP SEB_A5_A05_CD8 _2020-06-15,406.366638,220.968216,541.808105,295.853699,77.39447,632.654846,20.681892,11310.147461,2817.412109,157.465485,691.747437,FALSE,-13.9526298659784,-14.3695562966658,"6"
export_AJP SEB_A5_A05_CD8 _2020-06-15,531.513184,124.297958,201.85556,156.204987,233.511505,447.513977,66.081154,-271.134766,65.918419,199.17601,759.322388,TRUE,0.347065476715312,-19.6381676241114,"16"
export_AJP SEB_A5_A05_CD8 _2020-06-15,-24.267515,67.313156,1622.590088,198.281479,504.082458,1417.009033,10.448642,7491.982422,2361.937256,933.579895,2884.080566,FALSE,-12.0323937516858,-28.3186621389232,"24"
export_AJP SEB_A5_A05_CD8 _2020-06-15,959.143127,267.256104,273.272003,123.899452,45.571514,148.798401,32.120304,2565.371582,56.077705,950.012329,138.448059,FALSE,6.68434281265151,-2.30446364974414,"9"
export_AJP SEB_A5_A05_CD8 _2020-06-15,641.984558,246.450424,1195.169556,581.995483,506.851074,2874.373047,206.229416,1460.094727,310.117554,1512.131226,340.388428,FALSE,-22.5211102229634,-37.6348001409442,"24"
export_AJP SEB_A5_A05_CD8 _2020-06-15,628.434265,104.773293,346.154144,159.565506,564.590515,-0.461751,-64.919502,3849.853271,167.481369,1127.371216,18496.029297,FALSE,-5.95760255935324,43.9345444944452,"22"
export_AJP SEB_A5_A05_CD8 _2020-06-15,348.762177,129.607559,397.592529,746.880737,885.272644,109.465416,-60.548145,-287.699127,199.957367,939.315918,-52.528252,FALSE,11.0863749238551,-9.54145338571059,"11"
export_AJP SEB_A5_A05_CD8 _2020-06-15,185.77684,29.570707,293.257843,199.347183,616.753418,182.044205,-53.950775,3042.906982,979.424377,495.77887,325.140839,FALSE,3.09982640596933,-14.3428279653315,"11"
export_AJP SEB_A5_A05_CD8 _2020-06-15,875.436279,70.528519,449.44989,1703.460938,497.68045,289.775665,-80.866402,5904.408203,1123.689941,168.514297,-75.481339,FALSE,4.28500315031752,-7.77362240324661,"11"
export_AJP SEB_A5_A05_CD8 _2020-06-15,-481.404083,143.609329,202.355881,129.632874,1295.006104,144.532501,74.216423,287.404419,573.536987,76.866913,349.339111,FALSE,8.71040990625782,-13.0856792350203,"11"
export_AJP SEB_A5_A05_CD8 _2020-06-15,39452.5,234.509598,729.428711,378.082886,3017.504639,29.75824,-95.312805,991.600708,248.961151,5187.359375,715.582581,FALSE,30.2378950990442,38.8845055285061,"5"
export_AJP SEB_A5_A05_CD8 _2020-06-15,568.798279,234.142654,445.554321,413.237396,1167.944336,3981.938232,47.344391,12112.03418,1604.374146,3291.58374,91.39222,FALSE,-28.271080695615,-40.779655211179,"24"
export_AJP SEB_A5_A05_CD8 _2020-06-15,660.873474,199.328049,1261.5802,118.526291,633.216492,143.758224,-9.594503,2050.224365,922.862915,3898.069824,8.149118,FALSE,6.63680863499644,-14.7314052465113,"25"
export_AJP SEB_A5_A05_CD8 _2020-06-15,129.734528,62.666798,337.826111,111.998878,342.52002,402.773529,-14.460099,2248.01416,1073.432617,92.043442,340.063965,FALSE,-0.393835311676743,-16.8342564105611,"16"
export_AJP SEB_A5_A05_CD8 _2020-06-15,7263.061523,115.960899,295.459137,2539.802979,1564.184937,19.798754,41.783344,475.588593,62.249187,1118.718628,207.690704,FALSE,35.2588111817415,23.629279906641,"23"
export_AJP SEB_A5_A05_CD8 _2020-06-15,1718.684937,278.584656,935.726379,-266.245514,1879.509399,479.06604,-755.742065,-303.056091,383.683136,67725.921875,2657.415771,FALSE,40.0748546437061,-36.2555148388004,"27"
export_AJP SEB_A5_A05_CD8 _2020-06-15,2152.447266,83.441711,4972.887695,2478.514648,5928.794922,705.580505,481.723419,32766.021484,1934.621216,225.670502,727.186829,TRUE,-32.3144892463133,-22.8501456692723,"24"
export_AJP SEB_A5_A05_CD8 _2020-06-15,4389.739258,72.338623,251.707184,71.149269,184.520645,564.847961,93.402382,-37.770905,935.510925,57.280613,45.935246,FALSE,20.7935211331203,15.6374539520937,"15"
export_AJP SEB_A5_A05_CD8 _2020-06-15,373.510498,47.636654,2540.71167,-306.767548,2700.83667,2133.340332,-835.252686,17207.779297,262.927887,52473.269531,-228.665039,FALSE,34.4035438531214,-35.7293064290907,"27"
export_AJP SEB_A5_A05_CD8 _2020-06-15,437.336334,204.598282,327.100433,129.498581,755.417419,708.125183,35.436539,1899.669556,107.307404,214.230164,1064.9552,FALSE,-2.54616257464555,-24.34640160335,"16"
export_AJP SEB_A5_A05_CD8 _2020-06-15,204.794083,168.845673,368.102448,210.94342,27.339294,2892.395264,-49.39888,412.479919,193.579208,1015.009949,558.56604,FALSE,-23.4280562544466,-36.0176798592661,"24"
export_AJP SEB_A5_A05_CD8 _2020-06-15,348.009949,164.839218,365.321899,194.644135,472.378052,100.475761,46.665981,1967.935791,770.488586,85.864876,175.24025,FALSE,4.84348093736787,-8.27387387317832,"11"
export_AJP SEB_A5_A05_CD8 _2020-06-15,13959.311523,69.934677,426.17215,1274.504883,2167.345215,137.449295,97.478546,-475.061554,551.358643,1279.588013,271.760406,FALSE,31.1332195195722,32.9311810547383,"23"
export_AJP SEB_A5_A05_CD8 _2020-06-15,7388.110352,246.569717,495.192444,875.46106,2356.402588,328.391754,-12.715038,-28.615498,384.118988,974.835999,338.91745,FALSE,35.3285474831294,26.1038698139792,"23"
export_AJP SEB_A5_A05_CD8 _2020-06-15,428.118164,260.561768,418.915192,195.430542,279.668213,2554.496338,231.629608,3043.060791,366.284912,951.407837,413.558685,FALSE,-19.270128373611,-35.5080003938006,"24"
export_AJP SEB_A5_A05_CD8 _2020-06-15,594.576721,63.756302,191.309219,242.556564,993.409912,140.486603,20.254929,2765.575195,19.127911,1138.745117,348.955231,FALSE,9.44514411698889,-11.747829456254,"11"
export_AJP SEB_A5_A05_CD8 _2020-06-15,136.694763,119.193024,376.995758,114.162994,-16.780895,1817.457153,-0.269643,5098.032715,840.738647,401.402069,475.003418,FALSE,-14.4041302594647,-31.4428223872728,"24"
export_AJP SEB_A5_A05_CD8 _2020-06-15,4381.925781,73.540703,209.414444,1097.838867,1304.249023,24.370998,26.953819,-240.412659,684.862244,-138.829056,263.009186,FALSE,29.816505863688,15.3948321290101,"18"
export_AJP SEB_A5_A05_CD8 _2020-06-15,7220.735352,50.920914,353.37384,1700.276001,1818.744141,26.754704,-8.233974,-50.185246,30.772364,3817.890625,-78.37014,FALSE,35.1979360610778,24.7881940496597,"23"
export_AJP SEB_A5_A05_CD8 _2020-06-15,5857.760254,69.10865,295.643768,347.026428,2024.21875,321.878845,-50.754162,-105.550606,390.111755,3944.003906,166.96756,FALSE,33.1030066730598,21.813747646511,"23"
export_AJP SEB_A5_A05_CD8 _2020-06-15,445.31601,245.757645,922.997681,92.598007,378.318024,1663.936523,-24.191471,-9.494113,580.975403,2163.608398,435.124908,FALSE,-11.0405172576976,-33.035099536506,"24"
export_AJP SEB_A5_A05_CD8 _2020-06-15,-212.536896,-38.099857,476.748871,82.308205,772.309753,443.632477,-52.463142,53.20998,363.752136,6512.131348,46276.121094,FALSE,-8.78239968534095,56.6201116529124,"22"
export_AJP SEB_A5_A05_CD8 _2020-06-15,1656.712646,66.825798,809.565308,113.820488,-15.742982,1081.226685,61.461075,12344.698242,157.719254,254.478912,710.969177,FALSE,-16.4844689998352,-19.4355502609835,"15"
export_AJP SEB_A5_A05_CD8 _2020-06-15,2255.024414,186.891907,414.179382,152.999359,61.952515,725.134216,0.523485,6613.658691,153.372101,544.451172,5889.819824,FALSE,-0.719817202287572,7.1927863458429,"16"
export_AJP SEB_A5_A05_CD8 _2020-06-15,818.103821,198.750366,3137.730225,171.178696,646.997253,2578.501709,41.585838,3496.886719,545.640137,5672.097168,196.520157,FALSE,-22.5912113173021,-38.5613804822521,"24"
export_AJP SEB_A5_A05_CD8 _2020-06-15,266.468719,172.536255,472.72998,270.626862,209.377228,212.924301,3.686327,3801.026855,825.353455,790.076172,341.513,FALSE,-0.32784226038189,-14.0170654129462,"6"
export_AJP SEB_A5_A05_CD8 _2020-06-15,643.019226,89.063721,598.922974,111.143951,47.069202,1427.289307,-153.078583,5826.02832,1669.765503,350.475586,11464.178711,FALSE,-30.9499435590126,1.11655745176479,"14"
export_AJP SEB_A5_A05_CD8 _2020-06-15,664.735229,154.218262,327.233398,442.667206,1066.128418,510.143158,84.576515,8102.045898,556.6651,611.375183,259.719757,FALSE,-3.18222977367845,-24.9059838309693,"11"
export_AJP SEB_A5_A05_CD8 _2020-06-15,998.168579,89.284668,317.481323,61.376026,66.860878,257.822479,143.680862,4609.44043,154.090454,206.375778,4830.492676,FALSE,1.77191278265673,12.105531802817,"14"
export_AJP SEB_A5_A05_CD8 _2020-06-15,623.080505,177.811935,301.247375,185.784958,302.914948,237.38768,39.042152,2136.902344,1623.260864,1196.604004,26261.964844,FALSE,-8.32651140955525,49.5622638055721,"22"
export_AJP SEB_A5_A05_CD8 _2020-06-15,445.621857,56.411274,288.967133,110.862282,527.760559,1266.308594,54.950905,-384.53653,1058.527344,190.210831,404.521606,FALSE,-7.68318383747491,-30.8707705310131,"16"
export_AJP SEB_A5_A05_CD8 _2020-06-15,936.960999,103.736099,1579.972656,270.458893,1269.730957,959.520813,46.760185,2050.097412,553.034973,1006.662415,1285.909302,FALSE,-4.66331774874084,-28.0580473453686,"24"
export_AJP SEB_A5_A05_CD8 _2020-06-15,21283.943359,143.769302,204.055313,353.640411,903.545349,50.513664,-62.054478,-348.236938,662.102661,721.866211,330.045441,FALSE,30.0921953868562,35.2587214672593,"5"
export_AJP SEB_A5_A05_CD8 _2020-06-15,317.004089,101.834473,2569.598145,325.79541,2683.302734,1579.440308,17.376265,3540.623291,464.994202,917.132813,112.096634,FALSE,-13.3661099409937,-34.9414318509333,"15"
export_AJP SEB_A5_A05_CD8 _2020-06-15,-127.863098,10.530046,1322.228149,233.042984,103.725182,253.092896,50.375832,26166.248047,109.37635,660.59845,2301.054932,FALSE,-28.2428871046993,-18.8871146967284,"3"
export_AJP SEB_A5_A05_CD8 _2020-06-15,7727.958496,59.210281,249.483109,697.287048,2090.742676,138.417786,64.925812,64.883652,64.494598,-29.811045,2459.264404,FALSE,33.1195507534067,25.8650806431262,"23"
export_AJP SEB_A5_A05_CD8 _2020-06-15,1793.772827,121.972733,399.451233,306.881866,649.433594,404.942871,3.067665,6995.186035,455.487579,365.238831,1441.114014,FALSE,4.59838321340455,-0.0351898276288436,"15"
export_AJP SEB_A5_A05_CD8 _2020-06-15,-104.468117,76.834282,242.333618,105.405594,1411.366455,5761.759277,-131.849701,11516.865234,8057.753418,178.602768,1150.342651,FALSE,-29.9012713520182,-42.4403800291341,"24"
export_AJP SEB_A5_A05_CD8 _2020-06-15,494.009521,119.099228,413.925812,259.964447,1031.126587,95.363876,109.411766,5296.104492,381.116211,1103.16687,210.493698,FALSE,3.78687225773461,-13.5752528356863,"11"
export_AJP SEB_A5_A05_CD8 _2020-06-15,-32.559372,170.605759,412.586426,50.189522,2886.804688,1224.831421,-501.010437,1167.705078,741.128174,53574.96875,594.429321,FALSE,35.1599198498496,-33.4100042497795,"27"
export_AJP SEB_A5_A05_CD8 _2020-06-15,859.991821,140.663559,2024.342407,215.983444,77.085129,745.786499,187.365433,5764.712891,231.774353,339.258026,11574.195313,FALSE,-10.6396281370194,18.3113946626196,"14"
export_AJP SEB_A5_A05_CD8 _2020-06-15,6924.770508,58.417961,655.13208,854.816711,2411.424561,280.38681,63.514912,1944.354126,747.614746,280.982391,365.519379,FALSE,34.6003793908083,25.4776371771918,"23"
export_AJP SEB_A5_A05_CD8 _2020-06-15,140.321014,137.069519,615.636353,193.187866,199.110992,1422.505859,206.757278,1469.81958,1924.51123,411.304993,485.315155,FALSE,-10.3928417815357,-30.6365347221884,"24"
export_AJP SEB_A5_A05_CD8 _2020-06-15,7562.148926,226.382553,938.243835,601.496704,2332.625,694.516602,87.184326,170.622955,351.162659,4868.918457,167.853027,FALSE,33.4151077450994,25.4988685144963,"23"
export_AJP SEB_A5_A05_CD8 _2020-06-15,4753.577637,118.290337,452.854828,339.489655,1072.396484,98.406929,-164.439102,-140.701828,502.603851,12190.550781,-21.023062,FALSE,25.5946504774799,12.1498123174807,"12"
export_AJP SEB_A5_A05_CD8 _2020-06-15,146.001526,124.487427,232.454681,64.890129,123.596596,198.478333,25.295362,113.250854,280.45108,140.507797,1325.913574,TRUE,3.78087646677867,-4.80696975854792,"9"
export_AJP SEB_A5_A05_CD8 _2020-06-15,-9.315846,52.170753,337.649963,156.463135,620.87262,1016.536255,1.067241,4044.5979,1482.642456,305.796143,382.801208,FALSE,-5.35914200658848,-28.7026447299097,"16"
export_AJP SEB_A5_A05_CD8 _2020-06-15,537.099243,23.564772,218.863419,147.936325,385.984833,-24.932627,5.01729,520.22345,67.70282,3173.27832,1233.51062,FALSE,7.65651051638677,-9.65889254280443,"25"
export_AJP SEB_A5_A05_CD8 _2020-06-15,1200.997437,249.182693,731.17804,915.693542,1962.263306,1266.437378,183.181778,7414.230957,86.505905,646.366699,823.022034,FALSE,-10.6602649096873,-35.0561604048078,"16"
export_AJP SEB_A5_A05_CD8 _2020-06-15,508.514435,169.288589,281.588837,168.935822,487.417969,203.799652,6.714173,410.331177,145.392792,919.513062,794.244019,FALSE,6.93203555651754,-9.30656087188614,"9"
export_AJP SEB_A5_A05_CD8 _2020-06-15,269.174988,80.14447,358.618469,104.140137,335.902527,1156.38501,56.310165,8271.816406,215.611313,105.990585,2144.932861,FALSE,-11.1030194944848,-26.919179406577,"16"
export_AJP SEB_A5_A05_CD8 _2020-06-15,593.625183,174.611893,838.202332,73.736229,427.103912,1811.634277,88.859779,3995.003174,236.12439,913.390808,-40.669609,FALSE,-15.5425080269454,-33.2123319288591,"24"
export_AJP SEB_A5_A05_CD8 _2020-06-15,-100.191704,-31.672836,1234.237183,196.586243,2160.245361,2087.459473,31.35611,9457.125,1017.113037,233.888306,632.456543,FALSE,-19.8238888006234,-36.5274615360091,"24"
export_AJP SEB_A5_A05_CD8 _2020-06-15,187.039551,98.718498,233.112228,44.725986,532.180481,1234.329102,45.90097,555.99292,183.833435,237.885895,829.042297,FALSE,-7.93046453133071,-30.304494650009,"16"
export_AJP SEB_A5_A05_CD8 _2020-06-15,727.495178,36.192619,-106.157326,232.470596,206.773911,-7.716593,-97.345375,1240.252563,8085.836914,711.555908,15566.371094,FALSE,-14.4201648386605,38.1283512594653,"21"
export_AJP SEB_A5_A05_CD8 _2020-06-15,6649.104492,255.450272,789.293213,753.116882,1727.295532,336.993713,121.247345,-221.512833,307.444855,1098.0896,379.222809,FALSE,32.2465907087728,22.5556716265684,"23"
export_AJP SEB_A5_A05_CD8 _2020-06-15,23861.082031,82.360558,733.688965,1103.910034,895.471497,64.360962,12.172886,426.840332,239.242706,967.768127,301.619507,FALSE,30.1439109020602,36.1311961244891,"5"
export_AJP SEB_A5_A05_CD8 _2020-06-15,6998.693848,187.753052,432.407806,1630.77124,1501.525391,138.181076,60.360889,338.392792,28.543661,1182.081543,97.549812,FALSE,33.2761172538747,23.2116610586562,"23"
export_AJP SEB_A5_A05_CD8 _2020-06-15,74.687546,407.663422,420.86673,213.297226,1010.000183,250.15097,-42.205868,3488.893066,1692.972046,446.024658,224.528244,FALSE,3.66795861016681,-16.1757694295707,"11"
export_AJP SEB_A5_A05_CD8 _2020-06-15,836.702576,164.989731,427.58902,269.274323,43.520451,427.035217,27.033152,2231.714111,113.309326,341.31897,3846.767578,FALSE,1.16725012114315,0.158831848929883,"14"
export_AJP SEB_A5_A05_CD8 _2020-06-15,659.07019,119.007721,1050.554077,494.958496,519.134277,1114.28833,39.519203,22504.75,2171.477295,562.075806,5401.046875,FALSE,-27.414450319705,-22.9713325245874,"3"
export_AJP SEB_A5_A05_CD8 _2020-06-15,793.679504,-61.583435,189.463898,89.632744,105.91436,237.34668,60.401279,50.123322,104.899185,214.912994,724.834412,FALSE,7.35479658883491,-2.9809774087929,"9"
export_AJP SEB_A5_A05_CD8 _2020-06-15,1200.227173,213.351227,409.217285,80.777969,398.796875,118.316811,13.366003,6319.289551,107.308128,1085.391357,222.280777,FALSE,2.60437173477406,-2.84860720509123,"6"
export_AJP SEB_A5_A05_CD8 _2020-06-15,177.314499,45.362278,297.350647,218.011688,451.543945,784.20105,56.815521,3704.519043,848.349182,298.960083,385.722504,FALSE,-3.56603002440871,-25.3157216914438,"16"
export_AJP SEB_A5_A05_CD8 _2020-06-15,18265.185547,137.289688,315.038971,415.629822,1129.996216,152.62999,73.109818,102.641365,343.954987,307.870575,711.180664,FALSE,29.4823962071163,34.3512186620428,"5"
export_AJP SEB_A5_A05_CD8 _2020-06-15,2018.203491,46.907597,291.991028,656.444275,1555.924438,62.888931,448.87854,2022.475342,79.366234,1495.584717,466.20517,FALSE,16.3278381267482,4.5300934189726,"9"
export_AJP SEB_A5_A05_CD8 _2020-06-15,740.535156,103.644028,241.80687,64.677307,240.831421,254.970657,44.758751,10605.542969,389.475708,212.0177,875.325378,FALSE,-12.0633991665515,-12.5162640816701,"6"
export_AJP SEB_A5_A05_CD8 _2020-06-15,1659.885864,95.088264,280.603302,296.544647,2537.293701,257.920624,-4.301541,285.009064,227.953812,1849.236816,267.680847,FALSE,28.9524733947311,-4.76684400393469,"11"
export_AJP SEB_A5_A05_CD8 _2020-06-15,808.741028,241.336227,1175.315308,19.507656,893.704041,412.322601,-93.417953,322.63324,49.342201,8932.026367,21035.570313,FALSE,-6.15500254283856,48.8066132720171,"10"
export_AJP SEB_A5_A05_CD8 _2020-06-15,303.691193,26.822311,327.833191,-3.420266,320.301392,440.127869,51.006577,-113.132782,-10.731928,563.522827,10968.054688,FALSE,-2.01651815562245,32.1051670466746,"14"
export_AJP SEB_A5_A05_CD8 _2020-06-15,8450.958008,155.114944,227.740555,1541.019287,1307.021606,60.079521,-88.770844,163.04245,-192.291077,531.263367,829.824585,FALSE,31.938202368708,26.5175418418756,"23"
export_AJP SEB_A5_A05_CD8 _2020-06-15,3241.028564,135.175751,213.416656,34.638332,13.24094,581.449341,9.066535,343.654907,-115.34211,-46.129932,1315.522827,FALSE,15.8971098942587,11.6599934145331,"15"
export_AJP SEB_A5_A05_CD8 _2020-06-15,-422.839386,71.005814,551.147888,288.556854,1014.509888,320.19043,-0.496289,4121.370117,654.936523,-113.693268,328.34436,FALSE,1.70680053401228,-19.8064920654065,"11"
export_AJP SEB_A5_A05_CD8 _2020-06-15,-204.928864,60.603203,323.364532,166.24736,398.396881,748.001709,131.297348,12345.884766,-2.081808,504.875,2408.884277,FALSE,-14.1839349191099,-21.9808779064452,"16"
export_AJP SEB_A5_A05_CD8 _2020-06-15,-66.703239,126.626472,1135.872192,345.297394,449.394897,14121.375,275.246124,-531.469604,270.942444,488.526031,12493.147461,FALSE,-25.9430364461808,-43.673019319354,"24"
export_AJP SEB_A5_A05_CD8 _2020-06-15,-325.107788,139.491058,112.668991,195.705948,1113.655518,553.963623,38.367619,4327.67334,1651.523315,51.650734,295.30014,FALSE,0.193231125910314,-24.8506534913444,"11"
export_AJP SEB_A5_A05_CD8 _2020-06-15,-819.682373,140.469238,145.903351,65.948418,595.536011,851.836975,36.336689,240.321106,3452.640137,314.856995,2543.762695,FALSE,-9.13574710908108,-15.6390585982125,"7"
export_AJP SEB_A5_A05_CD8 _2020-06-15,12651.566406,134.006943,642.944214,364.082733,2008.225708,186.619492,55.092991,-32.557247,328.951813,952.085266,350.528259,FALSE,32.1897197541933,33.1197475947988,"23"
export_AJP SEB_A5_A05_CD8 _2020-06-15,-468.318146,197.185379,393.237,74.068398,2167.549561,724.32373,24.792217,10396.746094,1090.886719,121.494278,282.202942,FALSE,-3.65929069785488,-30.9208421900703,"13"
export_AJP SEB_A5_A05_CD8 _2020-06-15,-145.203735,155.963425,454.024933,161.558716,-14.976174,2581.366211,91.206612,3508.744629,198.840576,530.402405,1370.007202,FALSE,-20.0757147228605,-33.6798092045585,"24"
export_AJP SEB_A5_A05_CD8 _2020-06-15,-1158.976196,178.597351,216.21608,412.142609,702.867188,285.869141,200.974335,3839.741699,335.854767,923.556091,40822.976563,FALSE,-8.30191278790483,53.1356883547004,"22"
export_AJP SEB_A5_A05_CD8 _2020-06-15,-259.005096,143.3582,551.814514,58.153866,334.904938,3200.33252,41.42424,5431.471191,815.210144,200.608002,586.691345,FALSE,-24.5068051473695,-35.6131111536407,"24"
export_AJP SEB_A5_A05_CD8 _2020-06-15,1517.721069,97.52964,442.382996,127.009834,221.060196,655.671204,22.252972,8917.978516,672.892944,352.946625,6777.776855,FALSE,-9.80069007784437,-0.348741021406011,"10"
export_AJP SEB_A5_A05_CD8 _2020-06-15,-269.606689,-14.044503,173.713531,380.554718,638.479553,198.249039,67.043442,1697.443115,618.346741,127.952103,37.307133,FALSE,4.60763907680591,-14.1655649785471,"11"
export_AJP SEB_A5_A05_CD8 _2020-06-15,6908.33252,243.260391,738.261658,1349.783691,1160.688232,164.833328,28.779547,2296.288818,1090.234253,704.806824,513.692383,FALSE,29.8958313920193,23.6717344991092,"23"
export_AJP SEB_A5_A05_CD8 _2020-06-15,-117.38018,-48.899963,583.419983,124.59697,579.080383,1281.067505,-74.381729,2139.284668,730.451904,136.194626,-84.882195,FALSE,-7.75161573035596,-29.2532960052822,"16"
export_AJP SEB_A5_A05_CD8 _2020-06-15,1050.326904,169.158524,908.315247,315.763763,437.09613,1764.929688,234.168411,1957.130493,5439.106934,671.447449,28641.486328,FALSE,-12.8629154986415,44.8238796054034,"22"
export_AJP SEB_A5_A05_CD8 _2020-06-15,126.637192,45.310303,490.694733,499.793976,905.934204,732.601013,47.973137,9190.924805,1988.517456,133.096542,1790.47229,FALSE,-8.70154309674765,-24.8440764990302,"13"
export_AJP SEB_A5_A05_CD8 _2020-06-15,587.942383,150.211731,337.395233,147.219406,485.190277,1644.751953,10.750003,463.788971,115.390244,213.127396,763.852356,FALSE,-12.2863979791542,-32.7154655157674,"24"
export_AJP SEB_A5_A05_CD8 _2020-06-15,551.847229,211.779648,1099.096069,244.498535,564.845215,461.738495,327.389252,665.791077,507.000763,962.705444,114.346382,FALSE,1.35577293609929,-13.1537014471344,"16"
export_AJP SEB_A5_A05_CD8 _2020-06-15,-94.236984,127.839165,1128.73999,269.47522,1546.917603,1509.823242,66.943802,18986.300781,442.89975,95.077248,743.558899,FALSE,-23.6105181050578,-27.9485492075572,"2"
export_AJP SEB_A5_A05_CD8 _2020-06-15,3209.643311,231.373138,320.496948,16.136003,491.178955,129.436646,-2.254434,13693.110352,1129.970459,34.6917,192.513748,FALSE,13.4466810149669,17.4063110709747,"15"
export_AJP SEB_A5_A05_CD8 _2020-06-15,-38.18549,194.2836,354.483124,236.776245,492.900299,121.04184,17.38188,313.128662,134.830994,607.737549,4007.492676,FALSE,1.77790751410169,3.07173056374932,"9"
export_AJP SEB_A5_A05_CD8 _2020-06-15,190.926819,138.995438,437.031799,1510.67334,839.089233,171.010574,-23.790829,2200.68335,777.213928,586.721252,183.560287,FALSE,12.1147825952765,-13.4028583145974,"11"
export_AJP SEB_A5_A05_CD8 _2020-06-15,54.580105,83.436005,-47.807232,140.514587,612.729004,679.180786,-189.847031,2773.056152,4140.513672,-7.097289,321.068024,FALSE,-13.8381464066207,-8.36664658099339,"6"
export_AJP SEB_A5_A05_CD8 _2020-06-15,187.787933,158.207794,492.843628,573.534363,293.4104,115.035835,-1.344475,682.94342,-9.588284,1401.465942,272.706696,FALSE,6.72744249788195,-11.9911958081107,"9"
export_AJP SEB_A5_A05_CD8 _2020-06-15,185.07518,4.279943,295.218048,121.376854,201.330872,772.209106,65.567635,202.483353,66.058342,1050.617798,547.978149,FALSE,-2.17261140456924,-24.8006347272031,"16"
export_AJP SEB_A5_A05_CD8 _2020-06-15,40.314247,182.949127,5230.530273,304.152283,127.005424,3958.861816,262.005615,31559.220703,784.67511,812.834229,9111.65332,FALSE,-29.2933746393956,-34.8527126272197,"24"
export_AJP SEB_A5_A05_CD8 _2020-06-15,908.466553,203.734955,1388.178345,128.278717,338.618347,1851.006836,-46.387444,5408.51123,792.619141,666.867493,2040.642212,FALSE,-15.8157542276934,-29.1520064702696,"24"
export_AJP SEB_A5_A05_CD8 _2020-06-15,6627.531738,47.488316,260.269073,1863.72583,1057.073608,-50.378693,29.458828,349.62207,-66.938194,315.204926,944.081482,FALSE,31.0941980037337,21.0933672691511,"23"
export_AJP SEB_A5_A05_CD8 _2020-06-15,2399.532227,168.952255,438.088196,254.195648,961.337158,165.731079,65.106979,363.530121,270.702393,1589.167969,445.891327,FALSE,21.2690675645254,7.8288836456353,"18"
export_AJP SEB_A5_A05_CD8 _2020-06-15,160.729263,90.841888,348.666168,147.253159,826.910583,977.969482,-52.939346,39318.949219,572.411743,-90.029579,71.573654,FALSE,-32.5410701539068,-22.544198198358,"3"
export_AJP SEB_A5_A05_CD8 _2020-06-15,238.403244,122.547432,962.095703,38.200989,231.157684,978.784729,54.122025,9719.959961,376.946014,498.000549,14839.387695,FALSE,-17.741966323043,24.7403629963165,"10"
export_AJP SEB_A5_A05_CD8 _2020-06-15,2229.642822,48.534309,262.953979,159.901077,187.398163,-86.730186,-94.514648,596.429382,1042.987915,1098.556274,28410.046875,FALSE,-8.48745331934038,52.1945962469579,"22"
export_AJP SEB_A5_A05_CD8 _2020-06-15,250.747635,163.803986,180.8125,1569.303345,515.455627,75.814667,29.405235,939.697876,559.335938,30.795017,75.236641,FALSE,12.6212487436834,-7.45937015616345,"11"
export_AJP SEB_A5_A05_CD8 _2020-06-15,1734.000122,137.439606,271.220795,176.305984,106.006325,787.309998,78.309784,2918.325195,1639.548584,37.379887,347.100281,FALSE,-1.68736544132345,-7.62087848839029,"16"
export_AJP SEB_A5_A05_CD8 _2020-06-15,19720.986328,105.048897,963.544373,986.142578,1831.532104,171.514542,-24.79537,28.673002,440.714966,1198.780518,330.207642,FALSE,31.3995879687544,34.78909697857,"5"
export_AJP SEB_A5_A05_CD8 _2020-06-15,1595.511597,306.675385,336.9776,300.88089,1297.051758,460.242279,-93.054962,956.736816,528.960632,4944.824219,123.795593,FALSE,12.7509209524769,-17.1280258252808,"25"
export_AJP SEB_A5_A05_CD8 _2020-06-15,-39.994534,105.907928,824.51886,1493.28064,873.401794,201.339264,178.173218,12976.237305,649.586853,1025.436768,7559.806152,TRUE,-27.3018205263842,-16.3172884278567,"10"
export_AJP SEB_A5_A05_CD8 _2020-06-15,366.888428,84.853561,591.94104,352.046021,244.522064,931.466309,1.816823,4506.268066,730.454041,829.410217,2000.188965,FALSE,-5.71424075033595,-25.1904922342223,"16"
export_AJP SEB_A5_A05_CD8 _2020-06-15,2313.074219,121.604645,352.353973,434.592285,1078.900024,507.080536,-21.639009,15757.145508,160.452332,917.848083,285.884583,FALSE,-8.52188024732351,-10.0514540326357,"15"
export_AJP SEB_A5_A05_CD8 _2020-06-15,511.835236,133.892914,400.128632,52.208405,190.330215,147.874908,51.819977,1192.960571,754.342712,153.940704,85.064232,FALSE,4.87771538607474,-5.26253361343488,"9"
export_AJP SEB_A5_A05_CD8 _2020-06-15,486.091095,176.604416,292.063721,131.012955,167.89592,813.167603,46.491165,8423.668945,818.630554,201.280212,161.646957,TRUE,-15.7868245030095,-23.8057871257318,"16"
export_AJP SEB_A5_A05_CD8 _2020-06-15,329.661621,173.481232,3864.354492,439.903564,610.665833,3938.791748,136.703842,20539.443359,2655.652832,276.461823,356.828217,FALSE,-27.186590754665,-37.9483938545166,"24"
export_AJP SEB_A5_A05_CD8 _2020-06-15,2287.440918,127.440605,368.004517,349.223633,359.243683,682.291382,39.318821,4143.753906,205.939758,250.351151,741.471924,FALSE,9.70342170960953,4.01536386016383,"15"
export_AJP SEB_A5_A05_CD8 _2020-06-15,32784.726563,274.03537,1054.477783,400.561951,1974.843994,713.891296,523.19751,860.878906,757.413879,2094.516602,292.919128,TRUE,30.1620769869573,36.7073478707637,"5"
export_AJP SEB_A5_A05_CD8 _2020-06-15,466.171814,22.987074,166.486023,178.164658,102.764633,166.355621,60.541721,2905.976563,565.485596,151.845154,34.235909,FALSE,1.23390325226241,-7.23872256745537,"6"
export_AJP SEB_A5_A05_CD8 _2020-06-15,1095.954224,82.524307,224.256149,66.333595,57.384926,279.520569,110.747078,7781.807617,35.66029,1347.873901,634.173645,FALSE,-7.14672548794419,-11.902670653251,"6"
export_AJP SEB_A5_A05_CD8 _2020-06-15,139.861343,107.730148,192.780731,264.398682,798.08313,1856.544189,98.48317,9429.841797,6078.988281,522.547668,2558.177246,FALSE,-33.2438805607202,-12.9723458764852,"2"
export_AJP SEB_A5_A05_CD8 _2020-06-15,853.008728,148.192474,550.129395,296.070068,167.938675,-509.102997,-57.066921,446.161743,493.610046,1591.030884,82117,FALSE,-13.4211485903438,59.5859841247015,"22"
export_AJP SEB_A5_A05_CD8 _2020-06-15,457.566528,113.677582,374.862366,667.568054,112.521751,692.110962,-64.797935,3766.022705,217.307098,135.659027,1617.069214,FALSE,-5.37052592031477,-20.3619948065353,"16"
export_AJP SEB_A5_A05_CD8 _2020-06-15,3728.432129,106.290565,580.533691,161.756989,147.58049,-234.734146,23.868914,200.210098,354.145233,1686.99353,59971.277344,FALSE,-11.4408844531494,57.8450697288861,"22"
export_AJP SEB_A5_A05_CD8 _2020-06-15,-75.341965,190.733109,188.288239,288.495453,839.587219,1074.764893,35.281372,4072.960938,1855.97998,464.212891,578.78949,FALSE,-5.48693542183186,-30.5268469796427,"16"
export_AJP SEB_A5_A05_CD8 _2020-06-15,301.354614,53.98925,230.311096,106.446167,1571.087524,1423.579712,-125.797218,5642.55957,1103.354492,179.657425,6800.070313,FALSE,-12.8154709458141,-28.6085276280197,"10"
export_AJP SEB_A5_A05_CD8 _2020-06-15,8572.702148,99.793373,1022.992188,495.134918,718.649292,592.633179,142.346039,6034.728516,239.588562,390.336182,9764.535156,FALSE,21.5990675312317,31.7009387331322,"5"
export_AJP SEB_A5_A05_CD8 _2020-06-15,-186.392715,120.444427,234.387466,206.149704,69.415977,1132.391357,14.801325,-325.131073,26.170643,687.089172,2221.399414,FALSE,-6.774496431559,-28.2938667211476,"16"
export_AJP SEB_A5_A05_CD8 _2020-06-15,1049.16626,111.916359,787.463989,577.605835,1526.805786,342.478973,105.813972,10785.685547,424.405884,349.729187,19752.917969,FALSE,-8.00704145034397,38.0176094138551,"1"
export_AJP SEB_A5_A05_CD8 _2020-06-15,122.476936,115.8825,494.109375,244.174484,1181.600342,1785.648193,34.766541,6985.098633,488.658234,364.164948,1601.154175,FALSE,-16.0268854251202,-34.8292089503417,"24"
export_AJP SEB_A5_A05_CD8 _2020-06-15,1438.603516,64.842888,304.930542,943.286133,484.46698,671.958801,54.555161,3432.392822,724.420532,293.417664,2730.311035,FALSE,3.11885614319107,-9.06099337595179,"16"
export_AJP SEB_A5_A05_CD8 _2020-06-15,118.542801,80.31897,293.65564,454.592102,-82.419853,837.817383,19.310705,5213.210449,694.759399,297.792816,3434.355957,FALSE,-7.81476653236448,-21.9544149350685,"16"
export_AJP SEB_A5_A05_CD8 _2020-06-15,221.478775,92.845581,763.315308,951.821594,82.858681,2040.492188,-7.95665,22348.892578,1115.825806,658.973389,321.917023,FALSE,-29.9935347097817,-31.1951668737018,"2"
export_AJP SEB_A5_A05_CD8 _2020-06-15,331.919464,145.625122,524.43335,296.254333,1016.571045,1139.412598,-37.927662,-213.531036,581.620544,1328.799805,1755.816406,FALSE,-5.60364234731067,-31.9732198310077,"16"
export_AJP SEB_A5_A05_CD8 _2020-06-15,671.231934,154.956299,908.978149,180.075317,99.89312,1845.045532,34.162106,3443.673828,1172.560669,367.006042,595.601501,FALSE,-14.3004631393915,-31.3744128333635,"24"
export_AJP SEB_A5_A05_CD8 _2020-06-15,428.519196,197.881882,1086.830933,216.179947,793.129883,949.714172,-196.436234,2995.984863,1429.859131,10729.842773,505.39801,FALSE,9.92321946656586,-31.9547871891361,"25"
export_AJP SEB_A5_A05_CD8 _2020-06-15,737.128113,227.598709,721.793091,316.596283,464.741974,645.192261,26.165646,12766.285156,756.892761,287.951599,186.687698,FALSE,-13.9349710673782,-16.4616294221718,"2"
export_AJP SEB_A5_A05_CD8 _2020-06-15,9701.570313,149.431137,1572.519653,326.548279,1494.608765,182.124664,-162.485046,239.324112,-18.554449,12459.742188,289.443726,FALSE,32.1836257456655,31.2191516866814,"12"
export_AJP SEB_A5_A05_CD8 _2020-06-15,734.60437,285.226166,5519.185059,274.959167,343.405579,3121.508057,304.047241,28786.232422,1490.753906,244.70993,209.756729,FALSE,-25.8443891595836,-29.366040497732,"24"
export_AJP SEB_A5_A05_CD8 _2020-06-15,1396.978149,73.841209,402.916504,34.308109,175.873215,347.046844,15.747802,7733.167969,163.789169,375.482178,5397.390625,FALSE,-1.21812429761008,7.03419929525987,"14"
export_AJP SEB_A5_A05_CD8 _2020-06-15,624.38562,105.935455,288.151581,354.196594,824.602173,276.604797,-64.014885,2151.699707,275.420898,8840.551758,309.423615,FALSE,16.6039094338277,-31.8203216517687,"25"
export_AJP SEB_A5_A05_CD8 _2020-06-15,1331.637085,190.281723,617.287781,1242.938232,1267.626221,120.520142,-44.835674,1387.229492,178.404633,1359.640381,419.898956,FALSE,21.6837586254403,1.87723089506571,"18"
export_AJP SEB_A5_A05_CD8 _2020-06-15,1111.862305,164.399673,2707.275391,606.718567,1132.853027,2133.211426,123.209648,13149.310547,642.483643,702.323181,10581.358398,FALSE,-27.8258700968249,-28.3689762642444,"24"
export_AJP SEB_A5_A05_CD8 _2020-06-15,229.609726,178.584579,262.721893,280.605621,1047.665527,261.888245,-26.717493,6107.929688,766.022644,202.026077,185.351959,FALSE,-0.632339491865058,-18.765081938973,"11"
export_AJP SEB_A5_A05_CD8 _2020-06-15,239.020416,66.198097,1008.150208,26.536135,602.861145,2066.158691,-164.124069,11064.619141,4213.966309,144.186951,5124.713867,FALSE,-24.7417639441531,-24.2028569057595,"2"
export_AJP SEB_A5_A05_CD8 _2020-06-15,685.653564,191.843735,698.783447,226.525253,243.40834,345.744476,50.988518,5199.01709,232.885422,950.50946,12113.954102,FALSE,-3.3141262697355,33.8501456331896,"14"
export_AJP SEB_A5_A05_CD8 _2020-06-15,115.359131,143.572144,648.644348,493.918701,1081.662964,645.360413,-15.541944,586.931519,303.896484,681.249634,1582.681641,FALSE,1.46497775355438,-24.0822719804437,"11"
export_AJP SEB_A5_A05_CD8 _2020-06-15,-6.107621,200.891006,355.478088,188.91156,177.421463,308.097504,60.062717,880.877563,99.432472,1302.902954,268.174652,TRUE,4.58616587855999,-17.3812526274011,"16"
export_AJP SEB_A5_A05_CD8 _2020-06-15,2.561541,160.968384,1227.760498,326.86377,641.809021,1170.280884,208.014465,4849.821777,2023.636475,534.390076,7704.058594,FALSE,-23.8230402951012,-13.8829309401639,"24"
export_AJP SEB_A5_A05_CD8 _2020-06-15,2069.941406,166.367661,28.434223,670.330383,1961.81897,234.463745,38.659542,645.678345,1970.068237,239.851151,254.339874,FALSE,26.0872979596005,0.810938616994631,"18"
export_AJP SEB_A5_A05_CD8 _2020-06-15,297.159332,113.51963,778.910278,1720.265503,1344.28479,270.989227,54.758652,3211.620117,16.918135,1142.243774,7942.445313,FALSE,6.01330292740175,34.422989099924,"11"
export_AJP SEB_A5_A05_CD8 _2020-06-15,1951.860229,159.998352,509.370087,502.57547,1316.778564,233.140366,48.805141,18892.744141,820.755066,332.692413,759.852783,TRUE,-29.4158712925182,-19.3391298982129,"2"
export_AJP SEB_A5_A05_CD8 _2020-06-15,59.384655,49.658676,353.46579,494.8862,816.289673,566.965637,-64.521034,16585.171875,742.02124,211.196594,202.882401,FALSE,-19.6603053316802,-18.1311457089041,"2"
export_AJP SEB_A5_A05_CD8 _2020-06-15,468.945374,135.136688,1633.494751,663.656311,384.310242,905.231506,53.392757,12593.042969,571.113525,481.982178,271.171326,FALSE,-12.4628689710756,-19.4554277136652,"24"
export_AJP SEB_A5_A05_CD8 _2020-06-15,-84.302963,145.697601,461.449402,459.934418,2865.468994,1102.605957,-9.934706,3440.135986,87.194885,1210.700439,547.029419,FALSE,-1.64587733639132,-37.066768576201,"13"
export_AJP SEB_A5_A05_CD8 _2020-06-15,858.471436,112.853783,282.799591,293.914093,1049.68396,-42.59692,144.957474,3253.126465,4935.950195,1108.311035,51658.222656,FALSE,-13.1408055096083,52.3385607778828,"22"
export_AJP SEB_A5_A05_CD8 _2020-06-15,3393.054199,187.451813,1017.735229,518.096436,1687.140137,269.250244,-303.037842,-372.855591,190.443512,28546.519531,-552.702942,FALSE,28.5874394856489,-37.8670555209732,"12"
export_AJP SEB_A5_A05_CD8 _2020-06-15,715.603699,123.689377,273.170959,334.051422,999.491577,869.608337,-73.95134,3378.700684,564.912048,12665.008789,238.885071,FALSE,15.3502886246725,-38.1511689402168,"25"
export_AJP SEB_A5_A05_CD8 _2020-06-15,56.537651,156.400421,805.21936,288.793732,566.737244,1348.007446,147.134277,5256.609375,2591.852783,635.856262,998.218567,FALSE,-9.71870699491985,-31.8770540482752,"2"
export_AJP SEB_A5_A05_CD8 _2020-06-15,-339.415802,111.194557,1026.456055,193.783173,375.24762,180.065826,64.9757,326.187439,388.034943,1166.145874,1341.728638,FALSE,3.71989988853769,-9.68854834152504,"9"
export_AJP SEB_A5_A05_CD8 _2020-06-15,367.6875,159.370407,603.633667,1082.053589,1006.238708,369.505249,147.171906,9060.625977,364.543976,1103.583618,484.497101,FALSE,-2.05893099286455,-24.4004471507612,"11"
export_AJP SEB_A5_A05_CD8 _2020-06-15,11149.857422,193.338196,251.659836,3561.494141,1691.179321,129.562714,66.854538,165.257004,-74.613686,-13.460475,1236.265625,FALSE,31.6537225152714,29.1239562126387,"23"
export_AJP SEB_A5_A05_CD8 _2020-06-15,1921.867798,119.99855,361.089081,413.668762,355.161804,500.950989,100.86451,2985.865479,148.058334,-120.604294,8705.402344,FALSE,0.87954325829049,26.5824971489946,"14"
export_AJP SEB_A5_A05_CD8 _2020-06-15,619.599792,110.992722,568.851868,535.295959,1627.795776,257.308777,218.720978,4299.477051,591.262573,235.987335,112.161987,TRUE,7.42066026845088,-17.3518410669784,"11"
export_AJP SEB_A5_A05_CD8 _2020-06-15,1521.232544,124.496323,384.249664,200.880753,832.960388,197.251419,-23.354376,1589.11377,126.476334,7437.260254,193.600281,FALSE,12.4845401543626,-18.8853844174031,"25"
export_AJP SEB_A5_A05_CD8 _2020-06-15,936.155579,90.868652,577.5,107.13343,814.701111,291.297882,-228.835022,289.703094,596.681885,17302.943359,3722.388184,FALSE,22.8240406035303,-33.8033857209671,"10"
export_AJP SEB_A5_A05_CD8 _2020-06-15,169.82933,182.421738,241.919144,100.431732,919.103027,2020.865112,252.633972,10474.25293,6888.93457,196.139526,358.174988,FALSE,-34.4811661811297,-11.328791328745,"2"
export_AJP SEB_A5_A05_CD8 _2020-06-15,453.140503,940.854553,1024.809814,1931.564331,1560.118042,3827.335693,19.979053,22717.666016,3350.530029,555.44574,-2.353722,FALSE,-28.5817267500654,-40.341152873091,"24"
export_AJP SEB_A5_A05_CD8 _2020-06-15,11098.013672,68.780876,437.046722,527.302368,1940.913086,142.264359,11.676786,-135.286011,250.251495,809.585999,9432.287109,FALSE,28.3985452193741,29.8876367993424,"5"
export_AJP SEB_A5_A05_CD8 _2020-06-15,10.274807,236.642532,268.33136,505.111725,1232.166016,151.141647,-66.672409,1521.6604,128.148163,1149.213379,1321.002319,FALSE,9.80861761436648,-16.1254776875987,"11"
export_AJP SEB_A5_A05_CD8 _2020-06-15,144.070908,183.075058,691.668579,240.749527,670.482422,1518.123535,199.796829,2053.669678,328.646881,826.108459,1263.343872,FALSE,-11.9250853009781,-33.5918643235497,"24"
export_AJP SEB_A5_A05_CD8 _2020-06-15,473.099579,220.308701,940.603333,235.567093,148.918365,413.054016,-12.136526,5859.633301,748.378906,2925.449707,284.628601,FALSE,-0.876452050814973,-17.5352579454689,"11"
export_AJP SEB_A5_A05_CD8 _2020-06-15,1453.804443,134.564072,362.376373,135.837952,140.322021,1128.795166,47.523094,1619.002808,141.101059,251.315994,10849.119141,TRUE,-34.8091214755825,-8.27022309196049,"14"
export_AJP SEB_A5_A05_CD8 _2020-06-15,3192.352783,203.009583,241.502289,708.798645,685.146973,294.498291,32.960438,11872.323242,674.444214,468.078949,122.297371,FALSE,17.6411203116461,15.8423023435079,"15"
export_AJP SEB_A5_A05_CD8 _2020-06-15,9596.138672,187.028503,389.356232,1879.658325,2610.32666,185.154587,56.167568,415.242554,270.427216,741.033325,9190.024414,FALSE,27.6143039396757,27.1673682835143,"5"
export_AJP SEB_A5_A05_CD8 _2020-06-15,-66.791656,141.906616,414.345551,127.16481,361.670868,756.323425,62.123501,80.24321,22.285925,578.705505,791.50592,FALSE,-1.6742384124022,-24.6552905652743,"16"
export_AJP SEB_A5_A05_CD8 _2020-06-15,26.805311,204.641541,2173.75,227.923798,2222.197266,1561.146118,486.527161,7122.629395,837.409058,415.160065,1702.78064,FALSE,-13.6459709879879,-33.8409279929937,"2"
export_AJP SEB_A5_A05_CD8 _2020-06-15,327.681091,103.870903,251.21489,62.766159,58.000591,62.098763,87.973267,4189.770508,142.280853,253.618896,8436.576172,FALSE,0.467215890713648,24.8414055413664,"14"
export_AJP SEB_A5_A05_CD8 _2020-06-15,589.216248,150.155136,2267.977783,952.099365,817.007263,1205.401855,-1.740553,10058.164063,417.395538,657.459595,1409.236938,FALSE,-11.2191166327074,-25.7089509049152,"24"
export_AJP SEB_A5_A05_CD8 _2020-06-15,47.51804,127.692818,349.634247,119.742012,720.314575,154.456787,-53.056976,258.347473,420.041443,877.862488,929.316833,FALSE,6.38884523390256,-12.267442744215,"11"
export_AJP SEB_A5_A05_CD8 _2020-06-15,7318.673828,102.510498,185.11438,1363.275513,1820.209473,62.061245,-35.20895,-192.497025,186.707672,3904.532959,4632.386719,FALSE,31.5558678741118,23.2015790074978,"23"
export_AJP SEB_A5_A05_CD8 _2020-06-15,1046.781494,148.930466,2414.787598,1315.95813,771.692749,189.457779,-241.292786,13327.095703,2223.666992,577.539795,-58.037609,FALSE,-11.8233965291702,-7.36526046691041,"6"
export_AJP SEB_A5_A05_CD8 _2020-06-15,1299.01123,191.884369,717.68573,171.641617,51.807446,2464.404785,14.768816,4043.697754,3632.046387,165.204742,4901.744629,FALSE,-22.8010121650555,-30.5763711909834,"24"
export_AJP SEB_A5_A05_CD8 _2020-06-15,339.897491,80.013153,707.351807,222.93634,1147.45459,489.567474,-272.580933,16566.318359,3107.887939,12833.288086,242.398773,FALSE,8.9297154724492,-24.8765945858085,"25"
export_AJP SEB_A5_A05_CD8 _2020-06-15,2179.774902,196.59996,477.069519,329.095123,110.382248,326.053772,92.686958,-68.826653,524.617065,396.114349,3781.268066,FALSE,12.1794686838047,13.2818370662494,"9"
export_AJP SEB_A5_A05_CD8 _2020-06-15,546.535889,239.355438,3618.456787,528.120178,853.249451,1869.861816,52.731018,29019.478516,679.115906,603.273254,2660.333252,FALSE,-33.0832758923833,-28.5273618183747,"24"
export_AJP SEB_A5_A05_CD8 _2020-06-15,125.734047,99.945625,113.18148,80.451332,1215.719238,1037.026855,-45.08316,4267.757813,2463.79126,319.295319,132.550461,FALSE,-5.02632590591828,-30.4392513115457,"16"
export_AJP SEB_A5_A05_CD8 _2020-06-15,389.47821,278.869659,211.606476,178.488647,332.36145,135.83905,159.279037,558.472961,394.630615,214.945648,2586.844971,FALSE,2.29604347151486,-3.04125766276707,"9"
export_AJP SEB_A5_A05_CD8 _2020-06-15,9315.617188,111.67794,197.361145,2023.364624,901.634399,86.490646,26.111971,305.333618,562.855408,164.441437,222.306442,FALSE,31.7098115366179,29.0280890545138,"23"
export_AJP SEB_A5_A05_CD8 _2020-06-15,687.321289,-10.813961,963.519958,198.740601,207.133575,2234.171387,117.179504,1315.273193,8582.783203,223.930939,5135.250488,FALSE,-42.5065490509165,-2.09795983977411,"7"
export_AJP SEB_A5_A05_CD8 _2020-06-15,120.474495,120.830475,457.207794,643.766479,23.73114,3071.184814,121.3964,8127.053711,2409.528076,543.586365,354.12439,FALSE,-24.7370397250546,-37.7526230167079,"24"
export_AJP SEB_A5_A05_CD8 _2020-06-15,668.35498,69.668777,264.092102,103.996078,127.906113,465.988983,206.804169,1493.554077,992.513855,245.456345,222.199097,FALSE,-0.924708126071488,-11.5859698260998,"16"
export_AJP SEB_A5_A05_CD8 _2020-06-15,49.35104,60.705456,461.382813,251.994598,803.367798,1976.976685,132.039459,15230.870117,3987.72168,437.303253,288.167084,FALSE,-23.7916073488374,-30.2099367132142,"2"
export_AJP SEB_A5_A05_CD8 _2020-06-15,589.887146,85.246422,1252.471069,367.85672,1798.640259,864.91571,-12.886786,91.034416,672.721375,4066.882813,116.353172,FALSE,5.13003822573807,-30.6360656384712,"25"
export_AJP SEB_A5_A05_CD8 _2020-06-15,372.809479,120.525574,536.477417,219.851242,178.189194,173.275665,1.953823,138.780151,207.186798,412.04715,1129.846069,FALSE,3.84802176970773,-6.32331093629698,"9"
export_AJP SEB_A5_A05_CD8 _2020-06-15,802.427124,104.204224,5884.489258,2544.932861,5654.103027,8708.90332,82.647812,27162.574219,2621.890137,569.408997,780.400269,FALSE,-28.9913520270314,-42.621241924199,"24"
export_AJP SEB_A5_A05_CD8 _2020-06-15,3208.50293,134.919769,386.261871,232.250687,55.094505,1317.072144,220.01387,3361.951416,5051.010742,521.932922,13642.266602,FALSE,-17.7127806440353,23.8696487258862,"7"
export_AJP SEB_A5_A05_CD8 _2020-06-15,328.407471,136.492798,186.987442,97.996391,120.048546,294.3797,89.26683,78.094398,11.515698,296.488647,753.069824,FALSE,1.77819145343086,-9.64729312133226,"16"
export_AJP SEB_A5_A05_CD8 _2020-06-15,524.858826,112.918793,398.502045,376.144165,814.902588,1133.549072,-10.080114,8749.970703,505.406464,1130.724609,1030.874756,FALSE,-8.40056114030931,-30.5958254935474,"13"
export_AJP SEB_A5_A05_CD8 _2020-06-15,749.666992,167.968201,365.120972,119.948792,39.054581,36.482338,-14.047284,15760.729492,583.547302,166.247574,112.650352,FALSE,-17.0874749694483,-10.5891685439993,"6"
export_AJP SEB_A5_A05_CD8 _2020-06-15,-61.481117,141.172516,368.067902,126.074745,1479.295776,224.447083,-195.199097,-114.216545,762.429993,15033.449219,-118.859184,FALSE,22.5254297638189,-33.6202314645305,"25"
export_AJP SEB_A5_A05_CD8 _2020-06-15,744.759827,155.367279,2948.013916,526.582336,2148.212402,2286.833008,-27.54068,5466.498047,8123.24707,742.177124,124.1726,FALSE,-25.3084550357732,-24.2288267664796,"24"
export_AJP SEB_A5_A05_CD8 _2020-06-15,1111.64209,108.415657,336.89267,45.816643,195.728073,429.781433,7.94463,4093.989258,110.680481,237.676315,15416.62207,FALSE,-5.00885794139007,37.5260524755969,"14"
export_AJP SEB_A5_A05_CD8 _2020-06-15,533.151794,172.036087,1328.421997,232.656296,567.023499,409.783325,-317.660858,11891.831055,517.498047,15689.577148,1.339374,FALSE,18.94028615306,-32.8915353792135,"25"
export_AJP SEB_A5_A05_CD8 _2020-06-15,102.276657,163.290359,502.54422,156.075714,170.154846,769.764404,159.884552,5883.790039,800.270142,364.212036,9351.621094,FALSE,-13.534462346117,6.29006747245301,"14"
export_AJP SEB_A5_A05_CD8 _2020-06-15,-255.506226,105.117401,455.117554,285.79364,1151.818726,320.496521,-18.155981,230.444901,322.334381,3018.283691,29200.9375,FALSE,-8.62407039787295,52.8277643810464,"22"
export_AJP SEB_A5_A05_CD8 _2020-06-15,928.586609,164.07962,467.751099,98.626999,575.584351,609.27124,-25.100937,-67.167542,281.367401,1251.162476,2345.166504,FALSE,0.456455761564447,-15.6065479691666,"16"
export_AJP SEB_A5_A05_CD8 _2020-06-15,842.877258,173.366394,405.331879,68.620804,249.334183,825.245605,-2.086787,1799.611694,154.142639,648.45459,10104.334961,FALSE,-7.50702069112935,20.5123302079894,"14"
export_AJP SEB_A5_A05_CD8 _2020-06-15,508.004578,81.22261,278.47995,83.335342,404.696747,1112.035156,-249.031891,1837.915527,-52.845467,10978.962891,-428.000458,FALSE,9.36986262971039,-34.6472482145573,"25"
export_AJP SEB_A5_A05_CD8 _2020-06-15,1012.131592,-25.003498,400.313721,128.852051,110.831436,470.434296,41.701637,2610.422607,-27.257402,123.919754,739.525452,FALSE,-1.01330055841286,-9.61752872539406,"16"
export_AJP SEB_A5_A05_CD8 _2020-06-15,43.617214,32.345463,196.058014,62.506172,273.023193,525.217468,35.174,382.35376,65.601799,979.998718,1100.020752,FALSE,0.104206183531535,-21.0288410219995,"16"
export_AJP SEB_A5_A05_CD8 _2020-06-15,93.791176,125.970726,2655.018799,210.183319,969.322937,1843.904541,101.996193,2124.261719,632.270142,86.513046,1156.217285,FALSE,-15.7720186209065,-32.43653276072,"24"
export_AJP SEB_A5_A05_CD8 _2020-06-15,85.264709,155.294632,780.892578,378.575775,1130.901367,1113.489014,51.412807,11124.964844,693.427551,932.995361,2811.199707,FALSE,-11.510265448291,-29.7511613965847,"16"
export_AJP SEB_A5_A05_CD8 _2020-06-15,9499.751953,80.46125,178.76329,752.753174,1904.27002,221.238785,48.464123,250.056,88.976532,194.616913,1431.45459,FALSE,32.4170729098404,29.4576261499136,"23"
export_AJP SEB_A5_A05_CD8 _2020-06-15,23773.005859,162.11084,1163.317383,503.306427,2065.555664,207.483719,80.416656,334.224396,507.667236,1791.463013,344.872498,FALSE,31.3345130709212,35.9742535566371,"5"
export_AJP SEB_A5_A05_CD8 _2020-06-15,731.892944,222.784561,2685.019531,398.026733,128.22406,4909.740234,93.973618,4296.858398,310.367371,1639.478516,27653.966797,FALSE,-40.1189830231904,-30.9745824317385,"24"
export_AJP SEB_A5_A05_CD8 _2020-06-15,277.845459,97.360519,200.065781,319.272797,1319.864746,2389.998291,19.303471,9717.524414,599.766846,748.897583,422.208374,FALSE,-23.0431769747915,-37.7452263833252,"24"
export_AJP SEB_A5_A05_CD8 _2020-06-15,953.978577,258.407349,422.157196,399.10083,54.816055,1018.853149,37.735962,5019.665039,135.731766,829.576843,16992.041016,FALSE,-10.4652234214416,29.4164424442337,"14"
export_AJP SEB_A5_A05_CD8 _2020-06-15,520.500549,99.030701,6181.351074,256.479462,635.268372,5393.935547,589.632507,15577.370117,2182.57959,781.792175,22802.580078,FALSE,-26.0161624041823,-37.3395991793973,"24"
export_AJP SEB_A5_A05_CD8 _2020-06-15,798.304138,258.080688,688.640686,89.669655,431.24472,2071.401855,-81.791985,11.012487,1060.456421,12561.246094,-126.550369,FALSE,-11.0045098780027,-38.9616289447407,"25"
export_AJP SEB_A5_A05_CD8 _2020-06-15,351.35614,235.278473,1776.766113,278.472321,618.611511,1251.631348,81.840126,17159.546875,887.36084,572.431458,241.238312,FALSE,-19.8456316746156,-22.931456963022,"24"
export_AJP SEB_A5_A05_CD8 _2020-06-15,207.213364,238.625671,1539.025269,185.755264,1267.93811,1385.930298,265.685608,3723.31958,272.051971,449.972076,1474.662964,FALSE,-11.5332712476138,-32.986082616808,"16"
export_AJP SEB_A5_A05_CD8 _2020-06-15,1651.155151,182.253128,386.61261,211.333847,1094.45813,186.894089,112.870735,146.90564,-22.328566,827.638611,5849.331055,FALSE,9.943639194161,18.4221164660267,"11"
export_AJP SEB_A5_A05_CD8 _2020-06-15,79.693771,122.676369,323.352692,708.310364,1581.054199,1279.807617,43.480804,3217.612793,194.811935,2933.10376,2520.641602,FALSE,-6.35512724078622,-38.3626546736934,"13"
export_AJP SEB_A5_A05_CD8 _2020-06-15,700.276917,181.169189,642.451477,277.125061,1831.788818,811.710083,-63.308456,515.679077,409.967133,5194.459961,310.781952,FALSE,8.45010703019377,-32.1113964146715,"25"
export_AJP SEB_A5_A05_CD8 _2020-06-15,286.106903,46.293816,316.35791,181.911987,-101.171623,153.544495,-21.327557,886.737549,78.551102,1054.134521,172.329453,FALSE,3.82055781039946,-9.65910270380718,"9"
export_AJP SEB_A5_A05_CD8 _2020-06-15,263.59436,107.309883,428.448578,626.652283,642.454895,660.205322,269.285065,10265.654297,90.524696,322.657715,1282.668213,FALSE,-11.1287251179039,-21.7848345825027,"6"
export_AJP SEB_A5_A05_CD8 _2020-06-15,461.962006,133.411407,558.367126,222.761215,453.54538,50.608189,108.074265,23.125744,998.825989,-17.947676,179.686157,FALSE,6.19809576611896,-5.64055094312657,"9"
export_AJP SEB_A5_A05_CD8 _2020-06-15,18487.572266,65.660675,320.508392,463.046539,1784.560303,39.650249,54.75703,575.609985,-24.406717,944.140686,938.873108,TRUE,30.289352457391,35.2391694009127,"5"
export_AJP SEB_A5_A05_CD8 _2020-06-15,11259.461914,1.160307,56.217922,1575.185059,1994.961304,155.898026,85.558586,421.748138,-81.62899,922.602478,295.528381,FALSE,30.8946884403851,31.3112506530969,"23"
export_AJP SEB_A5_A05_CD8 _2020-06-15,217.443741,138.37204,887.306641,149.095947,1235.973999,-9.10673,-164.822906,111.852783,677.086243,7590.796875,47089.882813,FALSE,-9.59099682235006,56.1512833790527,"22"
export_AJP SEB_A5_A05_CD8 _2020-06-15,1244.073975,100.660828,449.365021,204.494461,10.440737,611.47345,-27.139166,6831.284668,197.45842,586.833679,7344.819824,FALSE,-6.003324390034,6.64097938964882,"10"
export_AJP SEB_A5_A05_CD8 _2020-06-15,287.921844,157.714096,312.703369,201.71521,137.761215,681.797546,47.784069,1393.042603,247.898987,325.535706,3333.050049,FALSE,-4.98178925798764,-19.5676976922908,"14"
export_AJP SEB_A5_A05_CD8 _2020-06-15,1472.643433,38.271378,227.031464,624.32428,1749.315552,63.307522,20.160795,1511.921143,-20.378389,247.67691,1007.515442,FALSE,25.089020040582,1.04428580023576,"11"
export_AJP SEB_A5_A05_CD8 _2020-06-15,1191.233398,157.360397,230.342255,427.388,329.744812,242.927078,23.81303,3315.265625,2403.97876,216.19223,50.32616,FALSE,5.34820671249715,0.892907037936106,"15"
export_AJP SEB_A5_A05_CD8 _2020-06-15,426.886749,4.059592,553.090271,88.18322,89.533401,1081.352295,68.274345,7125.133301,47.530529,116.509117,784.929138,FALSE,-9.77106661711119,-24.3648174753742,"16"
export_AJP SEB_A5_A05_CD8 _2020-06-15,11175.629883,284.87381,609.163269,1801.836548,2138.050049,55.947914,-141.95372,440.981964,407.021179,2183.028809,399.712738,FALSE,33.0445795402975,31.9873313170107,"23"
export_AJP SEB_A5_A05_CD8 _2020-06-15,-67.242012,161.363052,-128.168976,275.294098,-65.084793,3651.157959,-15.192783,25.420099,13419.295898,322.229156,9644.061523,FALSE,-47.1322419515776,-1.8343287238136,"7"
export_AJP SEB_A5_A05_CD8 _2020-06-15,234.727509,76.952896,181.565598,135.790695,685.446289,1606.777466,-179.596191,7325.682129,2849.155029,427.95166,645.484131,FALSE,-15.2587372751883,-29.9223790259656,"2"
export_AJP SEB_A5_A05_CD8 _2020-06-15,351.842133,76.780388,1129.772217,133.38707,856.651123,915.047791,106.726707,9459.230469,318.730347,1711.041504,505.381989,FALSE,-7.24478703605225,-27.2514229748406,"16"
export_AJP SEB_A5_A05_CD8 _2020-06-15,18346.917969,110.756172,513.405396,289.474579,1725.542603,182.488541,9.22888,360.158386,437.323792,2880.339355,425.679199,FALSE,30.3080370511469,33.9664493151109,"5"
export_AJP SEB_A5_A05_CD8 _2020-06-15,-3.182735,69.830589,542.205017,79.599129,258.599945,1357.077637,22.542477,8391.549805,157.348083,434.277069,2447.692139,FALSE,-12.509083139223,-28.5878447507233,"2"
export_AJP SEB_A5_A05_CD8 _2020-06-15,1317.251587,172.282745,2596.598877,303.967651,890.888123,320.217224,-135.528854,16247.246094,3702.59375,757.189819,12991.081055,FALSE,-26.0327801831668,5.0303205204855,"1"
export_AJP SEB_A5_A05_CD8 _2020-06-15,12838.785156,220.31488,799.848022,1249.675903,1959.985352,171.249466,31.855009,377.980316,869.434387,677.361755,147.582733,FALSE,32.502611441257,33.3916499542106,"23"
export_AJP SEB_A5_A05_CD8 _2020-06-15,4041.272705,122.312393,523.307556,59.90379,338.90863,592.150024,74.209213,27970.880859,41.5009,925.595703,333.256622,FALSE,-15.9192982918704,-8.24126446266616,"15"
export_AJP SEB_A5_A05_CD8 _2020-06-15,1085.009888,98.619286,459.77713,253.688751,453.004364,879.754272,99.155792,381.752472,417.111694,1335.582275,290.80011,FALSE,-3.32420982864552,-25.1594277872994,"16"
export_AJP SEB_A5_A05_CD8 _2020-06-15,-329.712372,335.580322,4682.705078,162.94487,619.628113,2158.261963,-169.046356,15593.767578,3401.775391,376.128906,18960.642578,FALSE,-34.2901248878927,-6.67640951919269,"24"
export_AJP SEB_A5_A05_CD8 _2020-06-15,2580.706299,150.795319,969.177307,488.564789,1423.619995,677.851013,108.860054,3114.092041,182.735275,1053.18811,2996.544678,FALSE,17.4677717476997,6.34276285118187,"16"
export_AJP SEB_A5_A05_CD8 _2020-06-15,1080.826782,233.261063,1136.393799,390.403717,119.159363,1029.433472,332.864807,8020.028809,43.172943,624.223511,5940.023926,FALSE,-18.6659650720716,-17.9594954828869,"16"
export_AJP SEB_A5_A05_CD8 _2020-06-15,516.492004,121.133171,387.207153,137.281845,560.294678,2283.810547,-15.421042,7907.013672,670.538391,3483.853516,65.732765,FALSE,-20.7735894693453,-36.9030762146882,"24"
export_AJP SEB_A5_A05_CD8 _2020-06-15,882.926453,175.019867,358.588898,140.471222,262.757843,181.575775,52.388584,3191.652344,154.389053,1058.480835,1271.461182,FALSE,3.79780651744076,-4.46852085377729,"9"
export_AJP SEB_A5_A05_CD8 _2020-06-15,1981.130371,78.44455,436.576904,146.347961,-58.801815,521.616699,27.230349,8631.456055,60.658451,1156.758667,199.984131,FALSE,-1.10955048262527,-1.86000109460611,"15"
export_AJP SEB_A5_A05_CD8 _2020-06-15,3941.414063,183.53093,113.374596,336.999695,698.144653,-2.292803,-192.233994,-359.100677,1960.677612,3647.095703,-90.271217,FALSE,22.9120865902972,12.5870703099619,"4"
export_AJP SEB_A5_A05_CD8 _2020-06-15,2559.039307,156.936569,675.56543,447.382294,1500.898193,23.720356,-186.937546,88.517281,422.13446,7206.926758,356.36615,FALSE,22.9671779751714,1.58464383959897,"18"
export_AJP SEB_A5_A05_CD8 _2020-06-15,613.026001,84.669365,286.332062,148.105347,906.394104,318.676422,-22.930994,3751.871338,873.236694,471.17627,178.734787,FALSE,1.81731628903195,-15.8544666528979,"11"
export_AJP SEB_A5_A05_CD8 _2020-06-15,10920.061523,69.46244,122.880653,1747.294678,931.685791,-97.040245,-20.913549,22.5399,654.469666,600.956909,-135.91922,FALSE,32.2775958655471,32.7582808650252,"23"
export_AJP SEB_A5_A05_CD8 _2020-06-15,900.520386,152.300354,748.243042,301.921356,372.002075,1304.655396,45.856598,2503.770508,104.926758,109.719536,1222.890991,FALSE,-10.1668707810646,-28.3746000746277,"16"
export_AJP SEB_A5_A05_CD8 _2020-06-15,1826.640503,61.946026,317.816254,252.736572,486.364838,13.558049,92.123398,3576.327148,856.821777,690.715576,27376.365234,FALSE,-8.63567373289037,48.5866685432702,"22"
export_AJP SEB_A5_A05_CD8 _2020-06-15,10.560624,93.963882,1394.452759,558.648499,829.037903,1011.929077,-7.649739,688.065308,346.470856,2218.462891,295.84668,FALSE,-2.05096695832819,-28.1899227017216,"24"
export_AJP SEB_A5_A05_CD8 _2020-06-15,1004.544128,47.875916,1487.360352,187.750107,61.935471,948.71344,-70.455299,360.840729,9867.185547,79.068825,3681.517822,FALSE,-29.8420091433012,9.25993560343517,"7"
export_AJP SEB_A5_A05_CD8 _2020-06-15,1884.200439,143.208191,337.250732,87.361198,119.463654,318.175842,125.421883,1740.702026,109.79184,687.575378,4059.70874,FALSE,11.1398571277096,14.5204988849952,"9"
export_AJP SEB_A5_A05_CD8 _2020-06-15,985.886719,241.274979,2871.804443,281.219818,1226.94104,563.971741,131.118256,16872.134766,474.749756,1357.014404,16920.742188,FALSE,-22.5457300049568,14.8662415476747,"1"
export_AJP SEB_A5_A05_CD8 _2020-06-15,4278.433105,68.816925,225.032486,332.688568,1870.210938,211.821426,388.907684,9946.618164,134.51622,918.606079,17.430721,FALSE,24.6023911779248,20.2506957661718,"15"
export_AJP SEB_A5_A05_CD8 _2020-06-15,422.223389,156.527054,1179.556396,262.365204,541.923889,3048.927979,3.12141,5926.490723,1969.344482,726.131958,872.241638,FALSE,-25.5632450495406,-36.8827889924472,"24"
export_AJP SEB_A5_A05_CD8 _2020-06-15,132.798279,71.954613,509.407074,245.936401,840.877014,1095.748535,-59.292408,954.286255,497.333557,588.179932,1052.934692,FALSE,-5.24497813453471,-29.7161021395839,"16"
export_AJP SEB_A5_A05_CD8 _2020-06-15,1681.64563,156.507446,1286.136963,655.035828,1056.551758,319.476013,13.535349,-44.543415,222.995743,2249.695557,341.704071,FALSE,18.0080766498748,2.00355123826667,"11"
export_AJP SEB_A5_A05_CD8 _2020-06-15,10984.929688,175.43483,492.711548,643.078003,1521.638794,148.798233,-43.221851,4635.696777,156.963348,1414.657959,569.529541,FALSE,31.4439232443562,32.7594829772001,"23"
export_AJP SEB_A5_A05_CD8 _2020-06-15,183.428925,44.333443,277.582214,76.798843,1153.622559,1290.734131,137.315262,2450.49585,961.659058,288.524963,339.334442,FALSE,-9.01921607308956,-33.4839044264181,"16"
export_AJP SEB_A5_A05_CD8 _2020-06-15,269.052399,173.034317,423.005585,170.455582,248.263245,2119.025146,243.317276,-925.637512,5184.963379,382.095581,1567.679565,FALSE,-22.249567526547,-21.0068471601025,"7"
export_AJP SEB_A5_A05_CD8 _2020-06-15,122.780396,219.58725,175.371048,203.391815,286.781097,69.561028,20.52327,5098.396973,700.175537,319.148834,97.090591,FALSE,-1.52766157650395,-10.1480854124733,"6"
export_AJP SEB_A5_A05_CD8 _2020-06-15,1665.919067,147.724091,1935.245117,50.251846,354.671539,1358.648438,-1.252203,4362.316406,236.685257,1698.179565,82968.007813,FALSE,-13.0002369517651,59.9400298027018,"22"
export_AJP SEB_A5_A05_CD8 _2020-06-15,949.361206,301.352264,324.434723,95.34742,366.170685,385.549561,92.381386,3406.199951,1013.341064,306.796906,294.492126,TRUE,-4.45193439050274,-16.1423667744709,"16"
export_AJP SEB_A5_A05_CD8 _2020-06-15,782.60498,168.519257,799.61615,189.811859,-17.480003,1366.04834,-94.064255,6911.396484,1946.817993,691.458923,11934.998047,FALSE,-31.2832353214166,4.28594323368022,"14"
export_AJP SEB_A5_A05_CD8 _2020-06-15,146.229416,96.821335,102.313377,162.080902,584.359131,1331.328613,107.518745,10496.870117,2177.198486,288.601318,120.797356,TRUE,-20.7680971540294,-30.9516609693839,"2"
export_AJP SEB_A5_A05_CD8 _2020-06-15,167.008545,84.31414,1026.796631,126.362045,181.816025,215.929672,75.062447,438.770203,-12.108187,174.692383,773.941467,FALSE,1.44833220915822,-8.27819333793621,"9"
export_AJP SEB_A5_A05_CD8 _2020-06-15,6795.313477,53.509392,105.131561,1009.152161,1311.960693,21.339279,-230.485168,-294.796143,965.52301,7643.89502,-51.388882,FALSE,31.9915148082243,23.6511399612916,"12"
export_AJP SEB_A5_A05_CD8 _2020-06-15,884.130615,223.092682,219.091461,218.21611,105.87249,-89.638,-17.647823,938.505737,2353.584473,876.258057,23880.601563,FALSE,-8.06249785961214,47.8637882658028,"22"
export_AJP SEB_A5_A05_CD8 _2020-06-15,211.47699,110.610489,247.946014,485.674774,1274.671997,213.37442,219.44809,2289.37915,608.161011,299.702911,275.417297,FALSE,8.39611273607123,-10.5973711472146,"11"
export_AJP SEB_A5_A05_CD8 _2020-06-15,5524.148926,207.337051,1065.506592,2227.832275,906.620483,176.831085,-154.601242,-368.9086,1592.343384,1805.369263,295.861115,TRUE,30.6047992476939,16.8603396090383,"18"
export_AJP SEB_A5_A05_CD8 _2020-06-15,392.614258,57.925385,252.723572,158.918854,88.099564,1158.987061,154.03006,9093.336914,5031.593262,429.150116,5810.973145,FALSE,-29.5871339760611,-4.24550253570479,"2"
export_AJP SEB_A5_A05_CD8 _2020-06-15,48.673279,151.286957,185.739487,192.613464,290.717529,135.56868,64.220512,129.827118,1031.52832,59.745476,127.365013,FALSE,4.98661254022266,-8.64518938036019,"9"
export_AJP SEB_A5_A05_CD8 _2020-06-15,326.830963,318.85614,1323.364502,147.973206,674.417236,749.093445,57.426712,4112.132324,153.80484,679.733337,2123.125244,FALSE,-5.16080504381468,-21.8123851656842,"16"
export_AJP SEB_A5_A05_CD8 _2020-06-15,-64.883957,83.758415,2144.618652,930.370483,1724.355713,1121.880981,96.603889,8722.373047,173.840958,1658.097168,502.764893,FALSE,-7.7370254697453,-30.9985748315298,"24"
export_AJP SEB_A5_A05_CD8 _2020-06-15,259.422913,28.157532,267.146851,269.682312,856.664368,551.922058,5.440348,12271.429688,704.788269,-152.552475,380.25116,FALSE,-14.4150337630027,-18.8389515341089,"2"
export_AJP SEB_A5_A05_CD8 _2020-06-15,752.354004,110.869965,237.58165,227.247253,754.752625,240.679169,190.659134,364.394562,1282.429199,61.555611,109.285881,FALSE,7.91698689768401,-5.17294971747948,"11"
export_AJP SEB_A5_A05_CD8 _2020-06-15,38.358181,161.931213,421.608368,306.21933,747.344849,770.835022,-20.510586,4243.250488,201.132233,907.307068,1306.523682,FALSE,-2.99545864962003,-26.6911916056186,"16"
export_AJP SEB_A5_A05_CD8 _2020-06-15,8592.292969,228.267853,2902.201416,2053.677979,2747.895508,259.620758,69.787216,1084.559692,1865.105469,24507.572266,142.558548,FALSE,33.9374564692,18.198689683269,"12"
export_AJP SEB_A5_A05_CD8 _2020-06-15,535.482971,186.703461,2318.336914,402.108795,719.986206,1208.173218,-232.845444,4047.439209,2931.72168,14895.305664,181.52121,FALSE,5.31206934254752,-31.4281921479575,"25"
export_AJP SEB_A5_A05_CD8 _2020-06-15,851.905945,213.002792,2701.306641,815.84314,950.434753,599.866333,-34.418045,10262.713867,1647.368042,835.007935,2146.407471,FALSE,-10.247230821637,-16.1448596178406,"6"
export_AJP SEB_A5_A05_CD8 _2020-06-15,-107.314049,150.603165,483.946503,231.996384,172.96077,209.675797,39.648926,439.607971,54.349911,685.532349,929.559998,FALSE,2.87589669657566,-11.2566295615717,"9"
export_AJP SEB_A5_A05_CD8 _2020-06-15,3051.891846,78.342934,383.271149,318.370239,539.538147,336.706879,354.223267,2500.132813,370.461365,408.266083,889.998962,TRUE,18.1617122080072,12.8136445053673,"4"
export_AJP SEB_A5_A05_CD8 _2020-06-15,9142.357422,88.99321,1065.004028,951.362915,291.418701,225.781021,-9.032313,28.798063,1380.120605,523.544189,322.67868,FALSE,27.6034375930808,27.844444282617,"23"
export_AJP SEB_A5_A05_CD8 _2020-06-15,469.40506,69.975426,537.353516,200.971191,1197.408569,157.716187,228.782547,10996.449219,-32.471691,226.241074,838.334656,FALSE,-9.7987136362867,-13.7371569709744,"11"
export_AJP SEB_A5_A05_CD8 _2020-06-15,2700.548584,155.630447,312.216705,65.487419,232.651718,208.378571,10.856334,2172.491943,1048.889038,423.671967,3361.625732,FALSE,13.2269271936611,15.5983361041897,"15"
export_AJP SEB_A5_A05_CD8 _2020-06-15,10037.457031,70.653297,404.683167,677.423828,2009.005615,353.567596,-985.883179,792.050293,335.239288,43081.984375,-219.256699,FALSE,24.5789631117549,-12.0553696220199,"12"
export_AJP SEB_A5_A05_CD8 _2020-06-15,571.027527,105.303116,299.247131,160.754059,500.172333,860.994934,74.352547,-111.641388,33.819176,224.517838,705.944946,FALSE,-3.31388586468152,-25.4859397076673,"16"
export_AJP SEB_A5_A05_CD8 _2020-06-15,-46.410244,87.344055,253.958542,308.428436,273.392426,1925.572876,14.586098,6661.350586,1546.853394,809.694214,1054.89978,FALSE,-15.1115987706362,-33.603824485986,"24"
export_AJP SEB_A5_A05_CD8 _2020-06-15,50.726353,152.154694,167.887238,167.575287,403.638153,193.495087,43.582588,2393.916748,935.822693,165.609161,168.103134,TRUE,-1.28568993316775,-10.8414244281285,"9"
export_AJP SEB_A5_A05_CD8 _2020-06-15,254.787003,125.229485,440.075073,160.990768,161.172714,688.662964,-96.940613,528.759277,121.655449,760.154297,1811.549072,FALSE,-3.5916325847948,-20.6260366552951,"16"
export_AJP SEB_A5_A05_CD8 _2020-06-15,4867.47998,99.450035,328.847595,147.628479,-21.649769,265.112396,65.909286,4684.033691,54.083672,548.884277,895.434998,FALSE,20.3292736473303,18.5741561075213,"15"
export_AJP SEB_A5_A05_CD8 _2020-06-15,297.78537,92.916161,197.088501,207.381958,550.975159,386.283112,-7.569845,3329.493896,1006.394958,173.176437,177.869217,FALSE,-0.436683615256084,-18.2780097281827,"11"
export_AJP SEB_A5_A05_CD8 _2020-06-15,546.502747,152.413116,573.187317,247.525009,60.418201,1531.994263,49.537403,5253.811035,549.464966,328.675079,3831.43335,FALSE,-13.295712973016,-27.2518614229733,"24"
export_AJP SEB_A5_A05_CD8 _2020-06-15,259.177979,105.34388,512.951904,269.200043,727.02356,215.927307,-177.190506,674.94104,1542.96106,454.818604,302.595795,FALSE,6.35856199702139,-11.4986535239274,"16"
export_AJP SEB_A5_A05_CD8 _2020-06-15,105.286255,110.116028,442.108917,274.868256,524.646118,589.844727,-10.095901,8568.53418,610.936035,506.164795,384.801849,FALSE,-8.13150834452452,-19.6775448787652,"16"
export_AJP SEB_A5_A05_CD8 _2020-06-15,277.910034,186.98938,579.737,199.801971,792.006897,1654.762329,2.133592,20451.857422,852.584839,26.876554,134.6185,FALSE,-26.9043596689547,-28.7973497238215,"2"
export_AJP SEB_A5_A05_CD8 _2020-06-15,382.990845,116.945793,404.577759,106.655075,80.816849,667.55188,-22.996742,3748.077881,182.095016,472.73056,1867.260376,FALSE,-5.86184252536241,-19.51237535297,"16"
export_AJP SEB_A5_A05_CD8 _2020-06-15,41161.761719,134.646118,560.355042,383.055054,1791.268921,-29.505754,-28.403973,255.81752,283.980286,1669.470459,637.908691,TRUE,30.1611034683839,36.8608892174111,"5"
export_AJP SEB_A5_A05_CD8 _2020-06-15,280.053528,34.305969,399.171631,403.982635,634.778564,1363.777466,-22.123865,23751.822266,201.708908,279.954559,934.108337,FALSE,-28.0324331294148,-26.9385590258046,"2"
export_AJP SEB_A5_A05_CD8 _2020-06-15,95.287628,167.553665,1016.805176,100.253014,265.358643,204.939743,-6.582381,847.795227,576.749084,545.350525,1437.379517,FALSE,1.75993062346548,-8.96600003298971,"9"
export_AJP SEB_A5_A05_CD8 _2020-06-15,11377.604492,53.575413,435.882294,2451.756348,1877.368408,71.364624,-18.430494,914.576782,192.619202,978.856079,575.795288,FALSE,31.8072292101621,31.736866021672,"23"
export_AJP SEB_A5_A05_CD8 _2020-06-15,7757.158691,198.388763,239.353439,440.220673,1373.453613,144.504913,-15.087512,-9.512314,937.633301,182.916702,224.565933,FALSE,31.3675059423328,26.4162393249925,"23"
export_AJP SEB_A5_A05_CD8 _2020-06-15,222.066589,133.616562,140.832291,155.228165,231.811829,325.13797,224.100433,172.335159,590.607849,523.664795,225.114716,FALSE,2.07512211009491,-10.5110927369962,"9"
export_AJP SEB_A5_A05_CD8 _2020-06-15,305.287445,249.862915,819.815063,136.244705,948.288513,453.894257,-31.34868,350.239075,155.99411,2060.098145,244.093338,FALSE,3.52048543737245,-21.4263044806987,"11"
export_AJP SEB_A5_A05_CD8 _2020-06-15,10094.245117,141.683701,745.368042,532.77533,2267.716797,329.758698,-0.984996,631.915527,636.311646,2483.556641,1203.352417,FALSE,32.7641990328416,30.1034656487114,"23"
export_AJP SEB_A5_A05_CD8 _2020-06-15,466.531647,140.622116,1609.107788,558.777527,350.597168,515.11676,-75.739532,3245.31543,659.105225,2373.012939,68.434761,FALSE,0.149436673980221,-17.7447179309117,"16"
export_AJP SEB_A5_A05_CD8 _2020-06-15,288.883728,233.880829,715.421082,365.345428,823.149658,636.068726,534.125854,18604.267578,554.5979,362.802124,298.359894,FALSE,-19.933149610201,-16.1326126734193,"6"
export_AJP SEB_A5_A05_CD8 _2020-06-15,5175.302246,141.499451,349.349792,209.718399,2985.310547,1269.959961,46.973316,7120.882813,376.981689,530.325195,2524.741455,FALSE,24.1821291507158,14.2873836176293,"15"
export_AJP SEB_A5_A05_CD8 _2020-06-15,297.255524,175.188339,737.686768,44.664436,169.389328,2079.625488,512.964905,7305.75293,831.693726,391.207703,210.899277,FALSE,-14.4358767406084,-28.655021568161,"24"
export_AJP SEB_A5_A05_CD8 _2020-06-15,390.070313,94.859352,203.438263,150.558151,132.71962,901.623535,-20.943037,3186.75415,490.312469,259.947601,5176.311523,TRUE,-10.762665230373,-26.6847712326684,"16"
export_AJP SEB_A5_A05_CD8 _2020-06-15,235.396149,112.120361,-431.213928,50.205925,6.535475,235.192825,-387.316376,2164.438965,16002.246094,-219.487762,1054.194946,FALSE,-34.1706969051795,25.7376478986208,"20"
export_AJP SEB_A5_A05_CD8 _2020-06-15,278.504364,191.596817,1526.390259,352.882904,1205.05481,919.293701,137.471146,11186.490234,909.18042,380.824524,1838.618042,TRUE,-20.5502402545597,-26.5564004843371,"24"
export_AJP SEB_A5_A05_CD8 _2020-06-15,818.271667,62.567551,1083.941162,412.305328,104.372932,182.63884,-35.708588,8214.9375,237.826721,1161.869141,303.899963,FALSE,-6.08877937240806,-8.73779666084119,"6"
export_AJP SEB_A5_A05_CD8 _2020-06-15,1080.694458,92.911728,1030.920898,232.698349,39.01437,421.103882,85.07486,2922.310547,175.19574,480.71698,2965.583252,FALSE,-0.329393794500209,-2.14524328373675,"16"
export_AJP SEB_A5_A05_CD8 _2020-06-15,5522.827637,60.769341,417.317566,362.925446,1491.000488,165.194931,81.158623,-0.750847,155.320618,3234.813721,237.301727,TRUE,28.6466629781003,17.7584407262129,"18"
export_AJP SEB_A5_A05_CD8 _2020-06-15,254.565765,181.572296,726.088684,268.769684,366.450653,1375.007813,-22.29908,6891.396973,402.441589,1074.961426,11739.104492,FALSE,-27.1091395900056,-1.82804458704199,"14"
export_AJP SEB_A5_A05_CD8 _2020-06-15,273.85849,131.04509,983.244263,245.032166,301.022919,286.512939,-23.407843,3541.94043,681.311523,563.531799,1960.894653,FALSE,-2.0823985522117,-12.7510961128669,"16"
export_AJP SEB_A5_A05_CD8 _2020-06-15,231.008972,103.634613,253.414398,156.278336,114.220695,81.209755,65.677094,1511.637085,694.286133,154.783981,199.708298,FALSE,3.22718902827416,-6.85263576990786,"9"
export_AJP SEB_A5_A05_CD8 _2020-06-15,133.268585,188.654541,1654.251709,751.050598,149.753296,1527.809692,-62.576637,11245.296875,1532.432129,230.373917,400.402771,FALSE,-15.3782097179383,-25.2422881252783,"24"
export_AJP SEB_A5_A05_CD8 _2020-06-15,76.545876,171.190002,449.208893,293.227875,925.977844,208.732086,-53.268978,98.2575,459.997833,1257.201538,307.194244,FALSE,8.69621458460045,-16.1540904610974,"11"
export_AJP SEB_A5_A05_CD8 _2020-06-15,1054.146118,160.747345,825.840271,511.709045,1214.682251,198.492264,84.883186,9165.308594,126.776154,994.700012,231.942612,FALSE,-1.56341714759752,-14.5543095954397,"11"
export_AJP SEB_A5_A05_CD8 _2020-06-15,189.55986,218.692535,421.226715,148.587906,1238.97998,418.970764,-90.846863,2462.355225,841.388855,365.673767,280.118866,FALSE,2.13890414361466,-20.9146759669772,"11"
export_AJP SEB_A5_A05_CD8 _2020-06-15,1887.65686,175.67511,190.45314,1432.587524,1338.422485,-35.943127,23.863487,217.417175,41.950359,1397.869141,1481.233765,FALSE,24.1766512496634,3.84517967169735,"18"
export_AJP SEB_A5_A05_CD8 _2020-06-15,1630.957764,183.160141,519.923279,226.268524,-13.302325,239.701965,85.174683,4820.49707,36.77029,890.534363,25621.683594,FALSE,-8.46392794677356,47.4568858079395,"22"
export_AJP SEB_A5_A05_CD8 _2020-06-15,-250.782227,119.358337,393.700684,70.06131,517.127258,1425.870239,-36.987682,9471.873047,369.846985,221.809387,952.772583,FALSE,-14.1823917159936,-29.4194809334808,"2"
export_AJP SEB_A5_A05_CD8 _2020-06-15,357.094177,26.962002,370.728638,335.119598,242.168716,109.949051,75.704865,-33.982563,1388.497437,208.349503,83.609734,FALSE,5.52079156047596,-6.42960686739518,"9"
export_AJP SEB_A5_A05_CD8 _2020-06-15,-231.803848,49.622753,156.166595,141.607513,228.055099,94.882347,10.343623,-50.583591,1396.638062,-78.313354,392.067047,FALSE,4.06508319323432,-7.04535138238152,"9"
export_AJP SEB_A5_A05_CD8 _2020-06-15,151.507675,210.836426,1040.646606,454.667755,824.835266,208.103561,36.59803,-95.883377,983.409302,60.726826,544.273499,FALSE,6.18437465765637,-10.9816896895053,"6"
export_AJP SEB_A5_A05_CD8 _2020-06-15,5.612177,124.58532,181.475433,193.549591,249.492584,427.669495,-59.853981,-254.470779,1184.941528,398.301697,136.059555,FALSE,3.14912933502347,-16.3365408344553,"16"
export_AJP SEB_A5_A05_CD8 _2020-06-15,-65.475082,80.919258,256.645111,118.728218,171.391052,143.902222,41.367249,366.749695,83.505348,323.011505,762.765747,FALSE,3.23271842674936,-8.3006006680271,"9"
export_AJP SEB_A5_A05_CD8 _2020-06-15,711.100159,290.557526,411.914368,167.731918,884.245239,291.723083,44.524559,-193.363861,200.513275,3364.835938,-5.141062,FALSE,9.06963742660697,-17.8876034428739,"25"
export_AJP SEB_A5_A05_CD8 _2020-06-15,557.660828,169.291519,779.786011,159.970917,618.767761,1198.860107,37.801601,3325.038818,677.360779,312.575256,114.631912,FALSE,-7.56719014927538,-28.6711482114766,"24"
export_AJP SEB_A5_A05_CD8 _2020-06-15,615.230347,100.04493,160.247833,150.547058,1133.950195,551.620728,-13.071186,6549.020508,737.797852,99.368301,967.683044,FALSE,-3.98156610431535,-24.4625160637684,"11"
export_AJP SEB_A5_A05_CD8 _2020-06-15,1375.917847,160.528,899.002502,70.431458,947.679138,1491.488159,45.241657,4799.734863,359.252441,2325.385254,24408.578125,FALSE,-11.9703539371361,36.5515633571195,"22"
export_AJP SEB_A5_A05_CD8 _2020-06-15,121.113808,-6.451973,366.478821,307.869141,1008.958984,1994.245117,-157.839874,7712.287598,1204.453491,370.250275,508.008026,FALSE,-18.1609105347574,-33.7428291519845,"24"
export_AJP SEB_A5_A05_CD8 _2020-06-15,341.041473,101.615677,244.221924,447.383453,548.767578,128.926636,33.047413,4956.312988,48.650932,923.732727,892.047119,FALSE,0.265270666325007,-14.5691259729868,"11"
export_AJP SEB_A5_A05_CD8 _2020-06-15,2114.03418,168.522049,333.16568,216.156784,-13.604606,400.987732,-39.182823,3032.294678,395.15036,386.637024,4667.242676,TRUE,5.69060972028243,9.03462387772492,"14"
export_AJP SEB_A5_A05_CD8 _2020-06-15,113.631287,282.616425,368.241394,155.943832,399.168335,166.241333,35.21941,959.471069,293.924591,2435.452637,1984.087402,FALSE,5.02217961172158,-12.6146455268322,"9"
export_AJP SEB_A5_A05_CD8 _2020-06-15,349.335144,109.322456,163.948395,127.690689,1851.20874,953.150085,39.834846,4727.114258,1200.234619,425.006256,2002.348999,FALSE,-3.99006533245479,-35.44062002399,"13"
export_AJP SEB_A5_A05_CD8 _2020-06-15,537.277466,192.712997,162.096237,107.856491,744.697144,175.017075,82.172043,1947.607666,251.538971,3003.387939,-118.016327,FALSE,7.178344982434,-17.0761772451369,"25"
export_AJP SEB_A5_A05_CD8 _2020-06-15,1213.553589,111.217209,279.422272,147.353851,149.979721,1257.668457,32.02676,3282.270996,71.523972,287.939819,4000.859375,FALSE,-12.7035874331851,-23.9308521834466,"24"
export_AJP SEB_A5_A05_CD8 _2020-06-15,232.903595,107.149818,480.750977,132.33989,284.20993,614.885437,27.342508,1904.935669,119.87883,1083.625854,185.933243,FALSE,-1.40266811416833,-21.1726624561435,"16"
export_AJP SEB_A5_A05_CD8 _2020-06-15,2101.440186,115.250603,3823.394043,445.032379,595.869202,616.990051,78.218262,6080.209961,1469.553955,498.548126,267.363281,FALSE,-2.21173185388646,-1.21530209133274,"6"
export_AJP SEB_A5_A05_CD8 _2020-06-15,252.557709,120.213577,213.968536,133.190659,143.649719,370.059814,-93.246529,5198.809082,1050.699463,132.568893,113.755814,FALSE,-5.86979065896668,-13.8960870444365,"11"
export_AJP SEB_A5_A05_CD8 _2020-06-15,515.840881,237.704971,986.001892,191.485321,1407.968628,1124.61499,22.342735,9568.681641,447.41098,11647.34375,542.961182,FALSE,1.96913697784217,-39.6186982050215,"25"
export_AJP SEB_A5_A05_CD8 _2020-06-15,4366.324219,100.716347,230.070786,116.332809,-33.050781,469.012054,84.014153,2121.006592,46.899918,930.645081,260.563171,FALSE,21.1198633967788,15.8616214410159,"15"
export_AJP SEB_A5_A05_CD8 _2020-06-15,895.709351,270.666687,994.793762,335.372925,167.844101,1136.530518,30.52313,8619.912109,160.819031,421.07428,792.205811,TRUE,-20.4500329918603,-29.2197839782847,"16"
export_AJP SEB_A5_A05_CD8 _2020-06-15,35.612778,152.041046,295.814087,47.123177,715.6745,584.858093,79.415192,-236.495743,188.634201,223.023651,739.827271,FALSE,1.38533050049979,-21.8820585214771,"16"
export_AJP SEB_A5_A05_CD8 _2020-06-15,459.4617,97.848686,1001.427734,1280.039673,3149.734619,539.227966,-30.026731,15949.770508,1232.523193,975.674072,296.414215,FALSE,-6.72166976164802,-28.8784843130467,"2"
export_AJP SEB_A5_A05_CD8 _2020-06-15,470.564301,112.99192,220.393784,244.474564,523.431702,281.966583,-56.951439,3060.429688,673.388855,208.647461,52.926369,FALSE,1.00622694379436,-14.1213963533341,"11"
export_AJP SEB_A5_A05_CD8 _2020-06-15,1114.653809,138.303406,604.689514,312.363861,460.273926,726.932312,55.102966,13044.731445,201.271622,1190.004272,590.479614,FALSE,-13.5787801947624,-19.3485346552359,"6"
export_AJP SEB_A5_A05_CD8 _2020-06-15,835.478638,131.459381,1190.762939,613.214661,537.948608,301.638062,55.962833,518.270935,231.127106,700.656921,2602.175049,FALSE,7.88286271148855,0.393628540016002,"9"
export_AJP SEB_A5_A05_CD8 _2020-06-15,664.382324,184.535721,863.25177,173.446365,160.660065,3777.328613,187.849838,45273.0625,4333.568359,830.892822,25.547697,FALSE,-31.698472064297,-31.8154584478463,"3"
export_AJP SEB_A5_A05_CD8 _2020-06-15,-143.706696,107.008385,-609.413147,216.582657,206.167725,3488.731934,-430.200012,10463.314453,19528.544922,382.628906,4782.415527,FALSE,-51.8745697733007,4.9435883968986,"7"
export_AJP SEB_A5_A05_CD8 _2020-06-15,17360.5,163.084137,774.52948,411.091339,1742.381348,143.988022,32.797153,139.874146,166.114288,1002.069214,9367.264648,FALSE,27.337767947703,30.4651071429258,"5"
export_AJP SEB_A5_A05_CD8 _2020-06-15,903.733398,148.159668,857.215271,232.341827,236.694916,1335.877075,43.286461,5096.444336,1261.033447,676.032654,20072.046875,FALSE,-14.0193766737576,30.3304955629847,"14"
export_AJP SEB_A5_A05_CD8 _2020-06-15,-636.2547,219.429901,1093.731567,104.998695,807.287598,1260.586792,17.415215,3320.126953,1985.052002,1934.269043,14554.571289,FALSE,-14.175848509502,15.6397510374331,"14"
export_AJP SEB_A5_A05_CD8 _2020-06-15,3623.359619,143.063416,396.192383,51.691017,217.154282,235.79834,127.582626,2471.29834,799.573181,27.420877,6236.87207,FALSE,11.906361267549,25.0023764024177,"15"
export_AJP SEB_A5_A05_CD8 _2020-06-15,1264.833862,47.673203,839.077515,111.397026,201.309921,980.705444,554.073853,2360.295654,10829.551758,1192.194458,2721.185059,FALSE,-37.1016688287668,8.00088764463108,"7"
export_AJP SEB_A5_A05_CD8 _2020-06-15,-20.756947,187.335754,1328.227539,268.100555,895.429443,1071.626099,75.280479,7293.926758,1245.133789,6.926852,243.352417,FALSE,-7.56567685443797,-27.9567804917492,"24"
export_AJP SEB_A5_A05_CD8 _2020-06-15,102.409592,137.14978,-480.639435,200.095886,339.74234,5.519815,-55.748363,-1368.026001,13199.699219,241.455429,3500.841797,FALSE,-33.1361665610963,22.9781421300425,"8"
export_AJP SEB_A5_A05_CD8 _2020-06-15,2321.630859,151.603973,3002.43335,627.505798,561.304016,1383.85022,190.094467,-235.909073,2561.650879,920.327087,5066.648926,FALSE,-10.6103063732733,-12.9296291193284,"24"
export_AJP SEB_A5_A05_CD8 _2020-06-15,1104.286621,113.46019,429.128662,227.976791,105.228012,-2.636209,3.413463,24.99579,29.25736,665.648499,18985.673828,FALSE,-5.51202791085241,42.9765656950785,"14"
export_AJP SEB_A5_A05_CD8 _2020-06-15,365.779877,61.285858,1003.080139,436.148346,758.325378,1487.591431,-55.893311,11088.957031,1983.242676,935.285156,349.556488,FALSE,-15.0799693369268,-30.1907482459659,"2"
export_AJP SEB_A5_A05_CD8 _2020-06-15,416.539185,144.964981,1382.664795,247.225067,998.677612,588.536011,-140.404984,4176.519531,483.709198,11398.421875,86.383286,FALSE,16.3581602030443,-32.8330912920702,"25"
export_AJP SEB_A5_A05_CD8 _2020-06-15,1476.123901,170.412903,530.391968,781.627625,114.822449,673.958069,-95.769485,1624.978882,1638.910767,137.289734,9399.161133,FALSE,-4.36715163938779,26.7997465268418,"14"
export_AJP SEB_A5_A05_CD8 _2020-06-15,174.53746,225.136673,325.283997,346.968475,314.287109,560.945984,56.407967,4057.829346,1067.309937,185.729813,132.134262,FALSE,-2.18599381452889,-20.6032256094946,"16"
export_AJP SEB_A5_A05_CD8 _2020-06-15,3470.063721,216.565399,1057.400513,442.641418,2995.990967,458.470337,-289.61673,425.400269,365.308014,33304.300781,1741.164307,FALSE,30.1288437048347,-38.1455495039101,"12"
export_AJP SEB_A5_A05_CD8 _2020-06-15,540.81189,120.302124,329.126587,183.983139,307.367035,1490.372437,35.953163,4965.860352,4720.507813,366.75174,10476.231445,FALSE,-33.0775561113094,-7.42271225399061,"7"
export_AJP SEB_A5_A05_CD8 _2020-06-15,-421.161865,188.731033,215.525909,145.560242,427.969391,888.842712,39.838604,1126.804077,103.013603,137.763672,5990.557617,FALSE,-6.41213061171994,-15.7583893722837,"14"
export_AJP SEB_A5_A05_CD8 _2020-06-15,513.758606,72.075684,203.696243,142.925568,677.910461,2549.892334,-160.60968,12042.277344,6123.279297,566.851868,2569.455566,FALSE,-31.8144514953981,-25.7903940255738,"24"
export_AJP SEB_A5_A05_CD8 _2020-06-15,1293.466187,91.040825,459.933044,104.824318,-1.481531,526.17218,66.148705,4790.973145,35.89093,464.443604,7199.417969,FALSE,-0.300161282669458,17.2819005280372,"10"
export_AJP SEB_A5_A05_CD8 _2020-06-15,30371.105469,296.128021,389.615692,461.785217,2121.268799,-18.243933,58.493832,983.085388,402.43399,1005.868225,450.276459,FALSE,30.3990806761283,37.2783963505529,"5"
export_AJP SEB_A5_A05_CD8 _2020-06-15,1548.201294,135.150742,330.55838,196.57579,77.903801,197.236359,-29.299051,2290.975342,256.653717,886.725769,124.98291,FALSE,11.3075887356356,3.36111483865974,"9"
export_AJP SEB_A5_A05_CD8 _2020-06-15,3394.0896,179.761139,245.498276,577.847351,1763.110962,194.524994,-29.521826,157.880554,7.801439,2452.012695,166.96347,FALSE,29.1611126685549,12.0405376189069,"18"
export_AJP SEB_A5_A05_CD8 _2020-06-15,-545.740356,138.698029,413.282623,133.880127,53.842903,487.484711,0.007483,2188.006104,1058.361572,505.752716,7494.476074,FALSE,-3.19465746861005,16.2962838941967,"14"
export_AJP SEB_A5_A05_CD8 _2020-06-15,744.48584,52.092186,321.071106,59.117287,222.586624,818.637207,54.357544,5969.596191,0.016301,922.077576,233.509552,FALSE,-6.86859845674048,-22.522816143506,"16"
export_AJP SEB_A5_A05_CD8 _2020-06-15,1072.415405,130.129913,3884.443848,486.24472,463.248779,1854.110352,-88.267334,5401.166016,2879.529053,211.960236,117.730522,FALSE,-16.1208998353217,-25.5847388596901,"24"
export_AJP SEB_A5_A05_CD8 _2020-06-15,173.23558,143.513092,248.037949,134.264999,599.951111,362.285339,-52.217216,197.680496,612.970581,237.055176,352.320007,FALSE,3.55830865826451,-15.8451850818145,"16"
export_AJP SEB_A5_A05_CD8 _2020-06-15,2696.355957,146.512924,532.097229,151.690369,52.791023,115.18103,112.133949,7433.611328,617.308533,273.244202,2104.662598,FALSE,12.5127510039394,15.6037710077743,"15"
export_AJP SEB_A5_A05_CD8 _2020-06-15,318.47879,97.303596,321.363434,104.566353,464.026398,847.771606,-13.340916,96.740273,108.973442,837.277527,797.283997,FALSE,-2.72684547131861,-25.6746745791845,"16"
export_AJP SEB_A5_A05_CD8 _2020-06-15,737.994873,97.581215,561.709412,134.321014,226.934753,698.805664,15.59789,449.559204,150.875626,1494.419189,1071.186523,FALSE,-2.00002517390931,-21.1629066387875,"16"
export_AJP SEB_A5_A05_CD8 _2020-06-15,18636.085938,124.438576,294.56897,772.442383,2350.605225,38.560173,66.414734,482.731384,726.503967,315.692169,542.508057,FALSE,30.7408999002895,34.4058419373406,"5"
export_AJP SEB_A5_A05_CD8 _2020-06-15,8100.233398,78.203979,277.008026,1645.68103,1509.084106,103.196869,-18.513538,94.66201,65.099014,3208.188965,243.883011,FALSE,33.58497514778,26.3525315065225,"23"
export_AJP SEB_A5_A05_CD8 _2020-06-15,-19.757042,132.259216,278.480194,107.698181,1307.487793,1110.609985,56.061771,7406.520508,870.102844,-246.499084,1475.846069,FALSE,-8.48660620179179,-31.7011051698439,"13"
export_AJP SEB_A5_A05_CD8 _2020-06-15,468.092743,143.876648,301.55481,110.847229,204.026016,485.722961,46.848637,50.935413,285.970428,248.596909,4027.315918,FALSE,-0.631416075420332,-3.23932640494561,"9"
export_AJP SEB_A5_A05_CD8 _2020-06-15,16.022947,208.333191,244.799408,74.347557,339.900787,88.718422,32.798031,326.384064,83.164452,446.497192,789.442993,FALSE,4.06598610633429,-8.48288758446196,"9"
export_AJP SEB_A5_A05_CD8 _2020-06-15,1624.733765,246.544617,2017.832153,406.929749,1127.12439,814.324768,115.915756,2147.711182,365.041656,898.601807,429.71405,FALSE,-0.0988413788833898,-13.1215120892768,"16"
export_AJP SEB_A5_A05_CD8 _2020-06-15,10554.56543,260.819275,254.283035,4055.697754,2020.902466,-24.425322,20.36227,259.78186,132.551514,2007.963623,1555.23877,FALSE,32.8679184999205,28.2843383939907,"23"
export_AJP SEB_A5_A05_CD8 _2020-06-15,-93.766792,101.06691,843.467957,413.133423,916.960876,268.584961,-0.906196,5908.819824,305.951141,875.799744,7204.424805,FALSE,0.204815489967845,26.610097479634,"10"
export_AJP SEB_A5_A05_CD8 _2020-06-15,1941.582886,147.972839,425.365936,190.90361,901.531799,144.486542,58.798893,267.537201,162.559723,5985.361328,2.047198,FALSE,17.0470631178735,-1.37727243046061,"25"
export_AJP SEB_A5_A05_CD8 _2020-06-15,68.398987,237.613663,436.22406,211.680008,509.546387,1313.181763,-252.375946,9111.710938,604.487244,16361.425781,312.036499,FALSE,11.3504127374479,-36.6884063573241,"25"
export_AJP SEB_A5_A05_CD8 _2020-06-15,662.810669,88.915314,353.40567,147.633072,-75.950493,641.911438,104.388557,15409.761719,124.701897,207.834518,1258.919067,FALSE,-18.1907858780936,-17.4173125591069,"6"
export_AJP SEB_A5_A05_CD8 _2020-06-15,986.508118,291.429108,303.04187,280.31424,96.543045,320.97287,9.671041,1224.680298,254.244812,1516.772705,516.182312,FALSE,6.01542874198041,-5.49317067480731,"9"
export_AJP SEB_A5_A05_CD8 _2020-06-15,-151.564209,65.190781,936.845825,265.245514,529.486389,1050.172729,40.265297,14339.841797,255.455566,929.617859,315.785553,FALSE,-16.3846292838414,-23.6688603815789,"2"
export_AJP SEB_A5_A05_CD8 _2020-06-15,21092.539063,99.7724,706.682861,171.467117,1376.94043,169.602936,-620.088196,787.928589,228.66095,37952.230469,-794.021729,FALSE,27.4832698101194,38.8030495906569,"12"
export_AJP SEB_A5_A05_CD8 _2020-06-15,-0.090117,76.042389,423.89682,132.579605,309.574738,289.768066,133.290466,194.557877,743.071167,101.3032,250.189636,FALSE,2.1597644524705,-11.5377049278549,"9"
export_AJP SEB_A5_A05_CD8 _2020-06-15,505.098938,127.175018,4154.09082,960.356201,722.76416,1976.231201,181.734772,8839.80957,1308.05603,563.683411,571.286926,FALSE,-19.8584798634503,-31.9900064842662,"24"
export_AJP SEB_A5_A05_CD8 _2020-06-15,256.166534,111.45414,406.84201,187.861801,1249.127686,1642.174316,-62.374069,5094.009277,62.980556,3201.004639,2770.124268,FALSE,-13.0969939321117,-35.8309816792191,"24"
export_AJP SEB_A5_A05_CD8 _2020-06-15,271.631226,141.633774,499.596405,260.606812,489.063934,448.668671,66.361977,6006.869629,553.125732,486.660309,7.092315,FALSE,-3.344884469654,-19.2566725141968,"11"
export_AJP SEB_A5_A05_CD8 _2020-06-15,5872.45166,194.208084,405.615692,1870.55249,1515.695679,93.441101,-16.525173,251.759155,384.088654,1142.384277,237.525299,FALSE,33.525476960992,19.8343030412873,"18"
export_AJP SEB_A5_A05_CD8 _2020-06-15,1360.446655,200.258667,963.263794,444.964691,271.413055,332.104797,712.924988,338.525452,163.236298,1006.679504,3293.758789,FALSE,-0.635809301674528,2.25520817818627,"28"
export_AJP SEB_A5_A05_CD8 _2020-06-15,6325.415527,538.89856,330.417938,3232.114502,685.921875,217.315659,-70.074768,-629.663574,1900.517456,536.169495,290.705963,FALSE,32.2063275016195,19.445347040306,"18"
export_AJP SEB_A5_A05_CD8 _2020-06-15,-57.786518,231.375076,185.378555,120.514473,101.895142,1434.373657,108.116707,4275.550293,2678.312744,924.038513,9378.27832,FALSE,-29.6488281609526,-10.217891322938,"24"
export_AJP SEB_A5_A05_CD8 _2020-06-15,1621.93811,123.899216,783.742798,414.289551,474.041199,366.625336,95.749893,1975.161133,1167.732056,693.845215,8636.056641,FALSE,0.687327318823217,29.1513095299138,"14"
export_AJP SEB_A5_A05_CD8 _2020-06-15,106.866066,182.05542,341.163544,122.932579,572.350525,737.132019,26.668331,11141.265625,592.486572,-144.897858,313.289734,FALSE,-13.4639002020794,-19.879711955878,"16"
export_AJP SEB_A5_A05_CD8 _2020-06-15,744.09314,33.384174,520.638977,271.406677,182.894135,360.046783,69.620743,4633.333008,602.065857,122.542694,226.654327,FALSE,-2.74929605683676,-12.8474170118642,"16"
export_AJP SEB_A5_A05_CD8 _2020-06-15,2883.238037,135.054001,509.500732,265.466736,395.795074,108.707909,172.860596,740.272217,3436.553711,413.720581,3848.774902,FALSE,11.1746917678133,17.3463344069448,"8"
export_AJP SEB_A5_A05_CD8 _2020-06-15,442.795807,106.381447,468.094208,290.402649,592.951355,1292.013306,5.141178,4980.636719,1181.672363,497.68988,1301.824707,FALSE,-9.30778921469633,-30.8537451661748,"16"
export_AJP SEB_A5_A05_CD8 _2020-06-15,82.78167,93.560242,664.809448,61.434303,232.229752,63.810276,19.256243,36.151894,173.990036,762.552917,805.918274,FALSE,3.85673909064818,-7.4092971945417,"9"
export_AJP SEB_A5_A05_CD8 _2020-06-15,32.67849,163.996902,386.633606,155.394211,44.451515,991.242188,18.414095,1253.801025,641.040527,380.629944,10262.064453,FALSE,-11.7933966965827,12.3618195485898,"14"
export_AJP SEB_A5_A05_CD8 _2020-06-15,649.694458,156.334808,1565.183228,506.108582,1460.575562,711.787537,20.151764,16615.496094,82.065285,771.26062,4163.666992,FALSE,-20.6510678404133,-19.9576412603978,"2"
export_AJP SEB_A5_A05_CD8 _2020-06-15,1194.698242,74.087936,614.22113,1242.731689,870.04657,727.734741,-144.135208,9045.4375,4275.933105,1694.108643,325.09375,TRUE,-15.4229709204679,-20.7482871721018,"6"
export_AJP SEB_A5_A05_CD8 _2020-06-15,1070.199341,169.203674,2015.852295,477.472717,85.06913,907.066101,110.313652,1216.794556,1251.1073,932.119019,107.816826,FALSE,-4.65675665480029,-17.5885790866085,"16"
export_AJP SEB_A5_A05_CD8 _2020-06-15,788.600525,104.292778,1298.558105,424.63623,1131.161865,1146.345825,57.0312,6245.128906,2612.731445,535.955627,-6.191631,FALSE,-7.04417956283552,-30.5380569480286,"24"
export_AJP SEB_A5_A05_CD8 _2020-06-15,67.455696,70.827385,310.829254,113.142288,60.568851,568.899048,1.895114,2722.848145,236.148987,50.276722,1360.174561,FALSE,-3.66635753823412,-19.4034316865896,"16"
export_AJP SEB_A5_A05_CD8 _2020-06-15,1287.790161,165.086258,906.594666,327.41333,795.433899,896.708374,167.608566,1048.99646,3516.378906,425.015106,625.792236,FALSE,-8.22662592236423,-19.8560687133566,"16"
export_AJP SEB_A5_A05_CD8 _2020-06-15,494.552277,103.002541,165.001083,134.187408,324.11911,636.480408,-16.316208,-250.126999,576.923096,86.49897,210.075104,FALSE,-0.235281728865877,-18.2595677937885,"16"
export_AJP SEB_A5_A05_CD8 _2020-06-15,10950.484375,92.890862,103.842133,639.186584,840.700073,21.932871,-38.066326,324.535339,570.446899,335.808533,29.157024,FALSE,31.7354636172786,33.0427852362891,"23"
export_AJP SEB_A5_A05_CD8 _2020-06-15,23.940697,84.572533,513.659729,168.078033,1468.825562,2225.939941,235.239319,10858.458984,777.853149,484.300354,3558.947754,FALSE,-21.5675818911884,-36.9267506739114,"24"
export_AJP SEB_A5_A05_CD8 _2020-06-15,285.485474,206.695007,7128.84082,514.553467,400.779968,2202.908691,74.791771,3082.544189,3893.966064,303.839233,385.049286,FALSE,-17.5769039649851,-26.668994951909,"24"
export_AJP SEB_A5_A05_CD8 _2020-06-15,-457.276794,175.887115,326.915527,306.948334,1385.010498,639.744934,103.675018,1127.281616,3252.293213,1009.211304,9044.119141,FALSE,-6.82658404796406,21.9152758312616,"10"
export_AJP SEB_A5_A05_CD8 _2020-06-15,631.848145,120.825668,137.625595,814.29126,1515.60437,179.823471,48.387608,-238.298965,1410.612305,-38.15559,-38.477978,FALSE,19.0987194627914,-9.68167062228761,"11"
export_AJP SEB_A5_A05_CD8 _2020-06-15,1364.083374,181.061676,1866.387329,470.997833,777.62439,1402.406006,135.835266,10745.945313,1292.462891,1627.216797,4979.708984,TRUE,-20.2664465916209,-30.0699357405773,"24"
export_AJP SEB_A5_A05_CD8 _2020-06-15,-5.309128,135.080231,2155.269531,1168.49292,1766.927002,1388.164063,192.4366,9367.069336,1250.390625,745.999023,2214.365967,FALSE,-12.5581192550665,-33.7502546581006,"24"
export_AJP SEB_A5_A05_CD8 _2020-06-15,660.341675,261.786438,577.226257,112.335594,1387.595093,263.945099,86.527237,1349.212646,280.470367,14993.583984,590.056824,FALSE,20.2386475404369,-36.217517049625,"25"
export_AJP SEB_A5_A05_CD8 _2020-06-15,532.698364,88.710602,265.986511,828.925781,1488.290039,162.626877,219.050079,-77.025551,738.575012,392.186371,-30.283367,FALSE,14.490396100332,-7.71528675255927,"11"
export_AJP SEB_A5_A05_CD8 _2020-06-15,553.875427,37.706497,734.654724,373.1922,782.90741,362.806519,9.126409,1184.19519,729.675232,-40.073994,256.475067,FALSE,3.71127163180352,-12.3927422832747,"11"
export_AJP SEB_A5_A05_CD8 _2020-06-15,258.46402,107.338341,370.229248,167.740036,694.83667,142.877533,12.977959,1705.760864,781.200806,428.376129,313.245422,FALSE,5.77841860055491,-12.0370680290685,"11"
export_AJP SEB_A5_A05_CD8 _2020-06-15,127.427513,156.499649,455.590698,146.039429,675.905945,2135.101807,71.933052,2069.578369,450.475037,2519.122803,590.136536,FALSE,-17.3775104779463,-37.1231603391453,"24"
export_AJP SEB_A5_A05_CD8 _2020-06-15,1581.043579,50.137428,1637.38208,531.486328,877.757019,573.331787,9.757348,1051.531006,414.27359,753.529968,3742.290527,FALSE,9.89264693904429,6.65250632827535,"16"
export_AJP SEB_A5_A05_CD8 _2020-06-15,463.850647,146.32431,316.624542,270.804504,841.481445,288.500336,26.438457,152.463394,554.685425,156.812317,-3.701932,FALSE,6.96715421678342,-10.6724652045009,"11"
export_AJP SEB_A5_A05_CD8 _2020-06-15,2937.240234,154.224289,1717.408813,329.716797,200.263,910.170471,99.63842,3021.612793,2584.489258,572.037537,243.415344,FALSE,5.50310222580298,6.4020539594334,"16"
export_AJP SEB_A5_A05_CD8 _2020-06-15,954.911743,236.249847,327.202057,1017.56311,1668.943848,81.496719,38.273094,1443.822632,652.630981,-195.418823,439.756134,FALSE,22.713120182953,-4.56630532844152,"11"
export_AJP SEB_A5_A05_CD8 _2020-06-15,628.48999,134.1465,236.570679,147.2966,-156.437302,733.972168,-4.069996,3941.665283,37.644302,900.941223,218.964249,FALSE,-5.44201972475646,-19.3422359653147,"16"
export_AJP SEB_A5_A05_CD8 _2020-06-15,475.560303,86.286438,409.185242,85.528679,388.816376,976.485291,113.439621,1903.465332,72.272766,442.368988,1242.51062,FALSE,-6.2079189458529,-27.4984165200887,"16"
export_AJP SEB_A5_A05_CD8 _2020-06-15,585.303467,95.847427,507.003662,138.064728,1059.343262,1720.750854,-387.43515,4045.678955,591.546143,18204.912109,-291.58078,TRUE,-14.4608026433768,-41.6872819597768,"25"
export_AJP SEB_A5_A05_CD8 _2020-06-15,-272.803528,80.026955,1820.481689,56.717468,175.150192,1106.047119,23.239807,4267.714844,1194.276978,977.091003,1371.405884,FALSE,-7.65848666877021,-23.8706147468724,"24"
export_AJP SEB_A5_A05_CD8 _2020-06-15,-12.925535,151.737381,738.894714,144.091278,1858.687744,255.338837,-321.788391,543.417908,824.28479,42928.648438,94.683762,FALSE,35.0164552348146,-35.5588068631768,"27"
export_AJP SEB_A5_A05_CD8 _2020-06-15,2361.713623,10.747821,71.329544,1486.030762,2229.573486,60.142151,-86.343597,-150.720276,561.22821,156.44693,-74.151619,FALSE,32.8515987917741,2.86040098124629,"18"
export_AJP SEB_A5_A05_CD8 _2020-06-15,258.516937,173.344894,409.996887,183.104843,184.94249,763.403748,103.580551,-22.48764,520.890015,173.49559,1149.819824,FALSE,-2.25356823024092,-22.5130143004491,"16"
export_AJP SEB_A5_A05_CD8 _2020-06-15,148.995438,78.449104,171.782471,179.383911,543.240112,86.972847,4.241452,8.246079,979.720093,220.118576,-36.434639,FALSE,7.17466263652697,-9.73354652870643,"11"
export_AJP SEB_A5_A05_CD8 _2020-06-15,255.375092,28.127653,3790.98999,470.501984,1533.199097,983.876953,-6.388279,4446.601563,132.474121,456.979462,879.617981,FALSE,-6.65636935696361,-22.9631865647283,"24"
export_AJP SEB_A5_A05_CD8 _2020-06-15,133.507751,77.229431,112.248123,67.232971,509.448639,138.99588,62.535694,4071.699951,1187.655151,237.165543,339.542572,TRUE,-3.56076143235544,-9.91503814851127,"11"
export_AJP SEB_A5_A05_CD8 _2020-06-15,-89.284744,120.810707,397.74411,91.542801,381.881042,487.330444,41.031303,4089.946533,111.141975,399.92514,919.283386,FALSE,-2.71629754344674,-20.1839577622734,"11"
export_AJP SEB_A5_A05_CD8 _2020-06-15,1520.392212,260.540375,550.102295,125.058838,209.787445,79.710854,142.79718,11038.291016,241.391541,1158.085815,115.691589,FALSE,-7.39928427980753,-3.29645381241392,"15"
export_AJP SEB_A5_A05_CD8 _2020-06-15,134.605484,178.253677,199.128799,205.8694,290.515015,193.089966,44.918343,1516.510254,953.952576,128.81485,300.023499,FALSE,2.81591742554219,-11.1472229115983,"9"
export_AJP SEB_A5_A05_CD8 _2020-06-15,407.58783,260.185852,272.447479,524.635376,1147.643433,127.586731,-122.332687,-1040.359863,1659.922852,195.634613,165.226776,TRUE,12.3196783601711,-12.4064720285884,"11"
export_AJP SEB_A5_A05_CD8 _2020-06-15,1025.551758,154.624176,314.935638,614.367126,380.279541,606.434448,76.687569,4610.867676,310.148376,218.725281,2264.255859,FALSE,-5.6375364152711,-18.8897577098979,"16"
export_AJP SEB_A5_A05_CD8 _2020-06-15,543.298279,53.290768,456.279175,167.884567,257.903931,569.902222,52.082043,5278.704102,62.095177,208.096222,785.067322,FALSE,-5.58044472006844,-19.2988405963868,"16"
export_AJP SEB_A5_A05_CD8 _2020-06-15,239.719193,217.511505,2245.36084,297.683563,1769.797729,3347.297607,-60.572514,17033.421875,1154.718262,1578.86084,299.482697,FALSE,-27.9829589693877,-37.3433960707242,"24"
export_AJP SEB_A5_A05_CD8 _2020-06-15,414.514191,251.652313,355.754272,129.346298,452.98056,315.683533,10.647571,4844.566895,642.383118,39.716217,44.061497,FALSE,-2.71495038467919,-14.9892802059581,"11"
export_AJP SEB_A5_A05_CD8 _2020-06-15,341.696594,83.204124,224.986343,127.607559,461.050201,359.321533,19.591404,243.177368,78.358688,426.375,1181.677246,FALSE,2.43152861192612,-14.5131834396031,"16"
export_AJP SEB_A5_A05_CD8 _2020-06-15,3049.241699,204.950699,246.586929,163.811752,188.443726,65.144279,-2.632185,595.273254,188.007538,481.061493,9417.383789,FALSE,5.16317650673267,27.739319448779,"15"
export_AJP SEB_A5_A05_CD8 _2020-06-15,85.600182,164.559799,338.397369,476.69928,792.393494,736.13385,14.313282,7572.48877,9.444249,1915.530762,1524.381348,FALSE,-3.91040929618362,-27.7986273253145,"16"
export_AJP SEB_A5_A05_CD8 _2020-06-15,-22.986053,172.689545,276.758911,306.268677,425.220795,73.827744,-42.007725,319.559662,559.250732,364.080231,232.473587,FALSE,6.32648919894284,-10.296928263545,"9"
export_AJP SEB_A5_A05_CD8 _2020-06-15,-71.378654,79.108261,279.622253,411.313812,437.160797,1115.321289,84.436775,11820.829102,374.877777,173.233643,916.056946,FALSE,-13.9692475336542,-26.546132987614,"2"
export_AJP SEB_A5_A05_CD8 _2020-06-15,-195.519791,90.468323,447.387177,144.855255,92.950333,1000.023499,160.30127,2247.789063,477.209686,165.979965,902.158142,TRUE,-8.3510736667956,-31.2346186564244,"16"
export_AJP SEB_A5_A05_CD8 _2020-06-15,804.893555,120.258553,612.9505,102.938965,620.609192,360.152466,-122.140442,92.900002,209.418823,7782.051758,288.83905,FALSE,12.5646916190144,-28.077068579843,"25"
export_AJP SEB_A5_A05_CD8 _2020-06-15,8472.732422,103.553238,250.902298,578.50647,1290.293213,106.783455,18.100908,167.335739,630.905212,371.191559,96.778366,FALSE,31.4571452383963,28.3388311695168,"23"
export_AJP SEB_A5_A05_CD8 _2020-06-15,992.739502,245.164444,598.778137,127.67189,312.285797,1609.200806,106.255547,8027.218262,125.759285,181.717056,4248.529785,FALSE,-16.5410063729204,-27.3471834390398,"24"
export_AJP SEB_A5_A05_CD8 _2020-06-15,319.677429,158.310562,403.885895,202.118515,8.456333,849.057312,-30.660505,9251.917969,105.102608,1444.508423,259.787292,FALSE,-9.65695327736787,-20.5501147540979,"16"
export_AJP SEB_A5_A05_CD8 _2020-06-15,877.646545,70.569839,486.809113,60.628716,93.776291,1120.496704,-30.830341,236.221054,495.972534,442.512451,8638.084961,FALSE,-12.7233157906587,-1.7825625005094,"14"
export_AJP SEB_A5_A05_CD8 _2020-06-15,7.72886,122.608429,198.085403,76.523232,291.322327,1936.099731,33.280914,949.995056,3787.958252,270.589203,7610.093262,FALSE,-25.9207058520586,-18.4859663822554,"24"
export_AJP SEB_A5_A05_CD8 _2020-06-15,426.568146,200.248657,370.030426,187.317886,635.699219,63.257748,27.763515,385.802277,706.11145,103.172554,304.089813,FALSE,7.44238029103156,-7.57627340951174,"11"
export_AJP SEB_A5_A05_CD8 _2020-06-15,-10.379996,87.629906,545.143066,1152.144287,274.967102,9.23516,-17.096069,2388.341064,394.525269,450.709503,1944.859253,FALSE,3.43804838846996,-5.10257966640453,"11"
export_AJP SEB_A5_A05_CD8 _2020-06-15,-18.791765,25.495771,242.346588,18.047543,1334.44751,1024.678711,-73.038376,9608.011719,997.240051,-116.937012,171.660553,FALSE,-11.1662834132849,-27.9812308070084,"13"
export_AJP SEB_A5_A05_CD8 _2020-06-15,907.62738,114.243179,403.563599,1030.575684,1815.7146,743.096924,26.921419,36462.058594,280.686035,686.231323,1736.491333,TRUE,-34.7881322771146,-24.8435827870088,"3"
export_AJP SEB_A5_A05_CD8 _2020-06-15,8633.490234,35.014717,372.317139,1133.082031,988.752258,74.548477,-14.787488,-366.474365,558.884033,124.657906,121.836113,FALSE,30.6953046294241,27.7899748197535,"23"
export_AJP SEB_A5_A05_CD8 _2020-06-15,389.5224,142.716568,522.633728,262.920349,1227.026611,1493.520386,6.193058,7741.270996,589.047424,49.230404,1548.797974,FALSE,-13.1521082989177,-33.2855733328314,"2"
export_AJP SEB_A5_A05_CD8 _2020-06-15,-264.413666,156.93306,445.795197,38.434265,151.773819,111.732887,0.543638,2580.425537,235.518417,922.820374,2425.551758,FALSE,0.919800881456941,-6.82788628172409,"9"
export_AJP SEB_A5_A05_CD8 _2020-06-15,587.172363,66.464142,760.707886,313.732819,789.715698,2913.102539,53.754452,3745.775879,87.143974,298.085419,2148.412842,FALSE,-25.2697351576002,-36.1473082478649,"24"
export_AJP SEB_A5_A05_CD8 _2020-06-15,558.169739,85.36528,1112.836182,308.492859,175.006439,733.662537,378.535919,18044.699219,761.96051,419.350128,2261.669922,FALSE,-20.2411327534975,-16.6673538843263,"6"
export_AJP SEB_A5_A05_CD8 _2020-06-15,283.759033,128.034225,464.598114,339.73526,1331.532471,230.373825,-32.013065,655.942383,384.840759,465.583496,903.480469,FALSE,9.2217134555607,-15.7044106850027,"11"
export_AJP SEB_A5_A05_CD8 _2020-06-15,433.327515,202.096893,757.222778,225.274307,520.373718,495.571136,59.239548,-15.040877,902.382324,915.641235,141.028915,FALSE,2.08982126497748,-18.6581091785053,"16"
export_AJP SEB_A5_A05_CD8 _2020-06-15,177.348587,73.131767,551.457703,481.960114,576.718018,292.370972,80.838318,2454.187988,321.688629,982.905151,6680.081055,FALSE,0.29949696768151,23.0327034191201,"14"
export_AJP SEB_A5_A05_CD8 _2020-06-15,1554.531006,152.24263,547.609741,152.168686,45.073597,265.969025,50.570869,7529.714355,167.449493,566.805481,3048.657715,FALSE,-0.614525909866576,2.54256258423211,"14"
export_AJP SEB_A5_A05_CD8 _2020-06-15,2144.974854,108.847527,407.129822,82.267174,146.523178,414.103333,8.593483,11354.744141,136.501984,1601.332031,1860.510742,FALSE,-3.89023994768837,-1.84459695792348,"15"
export_AJP SEB_A5_A05_CD8 _2020-06-15,-35.246681,88.739098,268.021423,96.46154,842.033264,315.211853,21.865902,249.952408,143.335571,289.591125,3104.153076,FALSE,2.27743445870433,-9.13307601301587,"11"
export_AJP SEB_A5_A05_CD8 _2020-06-15,329.270325,75.253143,321.836884,1219.705688,930.609314,847.44989,77.164307,1772.462158,667.311157,1.577401,254.372787,FALSE,-1.12939717754826,-28.2766397257373,"11"
export_AJP SEB_A5_A05_CD8 _2020-06-15,2636.778076,141.57428,475.046265,241.515289,594.321594,851.571228,36.890469,360.334106,147.30191,4302.710938,78.928711,FALSE,13.0350514287979,-1.14345156214195,"15"
export_AJP SEB_A5_A05_CD8 _2020-06-15,2182.472412,156.216354,369.49176,203.369766,170.140396,1615.45105,44.48893,1044.12085,123.520943,548.548218,3496.928223,FALSE,-12.1774922341868,-20.4599656469543,"16"
export_AJP SEB_A5_A05_CD8 _2020-06-15,1082.044678,210.548645,8004.822754,645.057312,315.799713,1123.67334,141.234558,-330.059418,812.057495,615.575806,100.684021,FALSE,-6.36575076972459,-8.72148259427133,"24"
export_AJP SEB_A5_A05_CD8 _2020-06-15,621.844299,201.717606,243.648193,108.907509,262.246307,268.431793,96.696793,2134.347168,220.763718,13.459987,4004.768555,FALSE,1.46446038221837,5.4215497005326,"14"
export_AJP SEB_A5_A05_CD8 _2020-06-15,129.76796,90.233582,-733.136841,272.934784,1276.246216,1307.602173,-69.495224,4990.903809,18739.923828,297.138031,13664.958984,FALSE,-40.4580290840241,16.3284384652204,"7"
export_AJP SEB_A5_A05_CD8 _2020-06-15,1658.881104,137.605103,415.083771,121.220108,163.662903,707.691467,54.64613,3081.615479,667.655884,816.934937,225.910385,TRUE,-4.78267685670941,-22.6026253899641,"16"
export_AJP SEB_A5_A05_CD8 _2020-06-15,444.432617,233.345978,928.191711,210.108704,16.733942,1125.708862,13.158308,13010.53418,238.501633,2410.376465,29.558882,TRUE,-24.4617992787267,-27.2773928948187,"2"
export_AJP SEB_A5_A05_CD8 _2020-06-15,1022.89917,152.946381,451.255432,205.980209,161.776169,655.287231,-4.82957,682.796509,16.231501,5522.977051,231.657715,FALSE,2.07752941967171,-23.8078344172338,"25"
export_AJP SEB_A5_A05_CD8 _2020-06-15,1851.753418,152.002136,545.039673,183.484268,320.502594,592.114075,107.151512,4047.302246,330.433228,171.284515,2252.70459,FALSE,3.87913438380437,0.663859635782625,"16"
export_AJP SEB_A5_A05_CD8 _2020-06-15,591.27832,167.408173,424.471222,247.837158,274.801636,265.340088,87.248894,102.878319,153.846527,694.792969,1736.052979,FALSE,4.89887353604466,-5.31901813813912,"9"
export_AJP SEB_A5_A05_CD8 _2020-06-15,235.256287,103.089256,1001.042175,171.89299,397.2034,892.153992,-115.348282,3380.150146,1395.077759,6134.189453,2233.037354,FALSE,-0.668539491563261,-29.1163051933432,"25"
export_AJP SEB_A5_A05_CD8 _2020-06-15,468.468994,156.197098,1047.60791,394.07663,628.965637,357.569336,119.321877,5805.927734,1646.197021,959.36145,21522.603516,FALSE,-7.31759308533325,43.2511142544804,"14"
export_AJP SEB_A5_A05_CD8 _2020-06-15,387.029999,145.724533,533.85553,115.832878,869.161133,885.91217,-16.265793,9585.317383,270.612488,1051.154175,433.440979,FALSE,-7.82270449762923,-25.7811080828135,"2"
export_AJP SEB_A5_A05_CD8 _2020-06-15,881.47467,210.16478,342.888062,173.769577,241.5522,205.740814,547.694031,13523.891602,159.185425,1203.312744,383.328156,FALSE,-16.1893550424511,-11.237226875191,"6"
export_AJP SEB_A5_A05_CD8 _2020-06-15,5231.658691,214.568893,850.811401,321.552032,1792.354004,151.105576,115.920578,432.338348,543.123108,4543.261719,188.451767,FALSE,31.3975400726553,19.5652392482284,"18"
export_AJP SEB_A5_A05_CD8 _2020-06-15,390.48291,135.029861,1646.887573,272.43869,185.465149,1033.880005,21.604652,1780.783691,638.287659,873.559937,110.348862,FALSE,-5.61885857382082,-22.3022415712092,"24"
export_AJP SEB_A5_A05_CD8 _2020-06-15,189.514343,56.186672,2061.787109,720.639038,719.287415,1642.720581,179.12648,6360.763672,941.722595,315.169037,1736.329712,FALSE,-13.8687680946867,-31.7129111547488,"24"
export_AJP SEB_A5_A05_CD8 _2020-06-15,-74.844986,127.386505,309.58075,113.486336,460.815857,132.643188,-1.050986,9353.011719,116.423592,254.598251,3949.429199,TRUE,-13.3421001347829,-10.8911508081324,"14"
export_AJP SEB_A5_A05_CD8 _2020-06-15,1049.082031,106.784203,268.401489,79.754227,288.226776,829.127136,31.728111,453.206879,49.892036,891.756226,445.561584,FALSE,-3.13377518490481,-20.3264225882104,"16"
export_AJP SEB_A5_A05_CD8 _2020-06-15,21234.917969,179.785034,529.321533,216.989761,2572.403564,-198.870117,-551.23645,483.267883,296.695038,24011.851563,42123.871094,FALSE,33.4472984303826,42.6374343206943,"5"
export_AJP SEB_A5_A05_CD8 _2020-06-15,6340.819824,90.285484,536.243896,650.715637,2277.700439,396.40802,-69.121643,160.958344,236.126587,1206.718018,136.177094,FALSE,34.162590154124,23.1409874407419,"23"
export_AJP SEB_A5_A05_CD8 _2020-06-15,335.832733,137.66095,5103.87793,622.959106,829.427185,1518.256836,52.78064,-58.210316,1720.676514,98.420631,2216.218018,FALSE,-12.38033464236,-25.9135879261132,"24"
export_AJP SEB_A5_A05_CD8 _2020-06-15,377.505432,47.34692,221.362915,147.00769,488.254364,1089.692871,-7.731602,11140.913086,238.378555,377.236755,735.747864,FALSE,-13.8972987053298,-25.1527062283186,"2"
export_AJP SEB_A5_A05_CD8 _2020-06-15,7144.015137,268.426331,313.277557,75.098373,-103.343422,435.75174,75.036667,327.035431,-13.568468,892.929565,353.1297,TRUE,22.6812677212183,22.5010455180235,"5"
export_AJP SEB_A5_A05_CD8 _2020-06-15,1379.724609,157.029404,473.898865,132.686234,191.641891,636.956299,57.287315,7428.346191,88.757553,455.12796,7607.894531,FALSE,-7.20567578560415,7.04027840026949,"10"
export_AJP SEB_A5_A05_CD8 _2020-06-15,297.729614,102.655807,748.638245,294.781494,756.670166,545.464172,-40.042549,4043.54248,372.2854,1398.677856,2290.312988,FALSE,-2.97636816202998,-22.7406649589184,"11"
export_AJP SEB_A5_A05_CD8 _2020-06-15,990.223206,246.445175,1362.757935,434.064667,694.076111,864.734619,28.979067,6487.916504,823.899902,540.824951,189.744736,FALSE,-6.00863862809637,-21.9031229078043,"24"
export_AJP SEB_A5_A05_CD8 _2020-06-15,14325.291016,148.93335,677.01709,1012.647644,337.982819,488.531067,111.052437,18589.542969,1046.381836,865.456787,288.527252,FALSE,27.4792194370979,34.9615093500921,"5"
export_AJP SEB_A5_A05_CD8 _2020-06-15,132.882141,78.082664,923.618591,118.718239,571.332703,2727.518066,262.412354,2725.275635,197.948502,220.204865,708.308289,FALSE,-19.631770523066,-34.4125667887705,"24"
export_AJP SEB_A5_A05_CD8 _2020-06-15,13.556654,154.509247,705.125671,196.321533,84.818596,799.950867,37.480206,4460.70459,66.542854,397.572723,1288.548462,FALSE,-5.33914813960571,-21.6788276217289,"16"
export_AJP SEB_A5_A05_CD8 _2020-06-15,247.589676,117.613441,477.479736,254.491196,1662.827637,1558.789185,-169.592773,237.829758,866.020569,17636.025391,-220.514618,FALSE,10.469113710881,-35.9398491975227,"25"
export_AJP SEB_A5_A05_CD8 _2020-06-15,-158.3396,98.730202,384.53363,187.96965,290.81778,126.397026,23.608755,203.347961,399.567169,781.807251,4197.376953,FALSE,1.00057308481266,5.39071631986757,"9"
export_AJP SEB_A5_A05_CD8 _2020-06-15,151.412064,89.499779,270.428711,49.903732,666.035889,697.278137,-1.313928,366.985291,204.76738,296.654022,845.437195,TRUE,-2.56114191740305,-26.5002524050474,"16"
export_AJP SEB_A5_A05_CD8 _2020-06-15,543.178894,3.628278,127.007538,650.378906,247.955521,57.832809,9.845405,3065.69165,1166.528809,272.844421,83.580521,FALSE,7.34656579282114,-3.81045209395821,"6"
export_AJP SEB_A5_A05_CD8 _2020-06-15,936.613037,90.811546,298.213928,80.216774,14.965527,242.510834,37.629704,201.061905,153.533005,744.647522,12063.298828,FALSE,-2.33776525584952,33.8568869212905,"14"
export_AJP SEB_A5_A05_CD8 _2020-06-15,-81.904556,128.752563,690.336731,208.172577,522.812134,800.628906,43.806454,789.500549,141.929947,281.452362,1022.87384,FALSE,-2.49096396979731,-25.3353666635134,"16"
export_AJP SEB_A5_A05_CD8 _2020-06-15,94.005898,66.696281,265.30484,308.182953,1572.299194,754.079834,-95.626785,11685.974609,1942.542847,589.051331,3561.053955,TRUE,-20.2400291010385,-25.2542244936483,"10"
export_AJP SEB_A5_A05_CD8 _2020-06-15,-209.207687,156.883179,277.851166,35.549076,780.632813,1910.484009,56.144249,4995.850586,1830.727295,299.803314,507.668884,FALSE,-15.457115658277,-35.0655276532006,"24"
export_AJP SEB_A5_A05_CD8 _2020-06-15,187.480453,103.385437,576.69751,157.413513,703.467468,1671.995361,-22.217073,139.682327,600.260925,294.689117,549.858459,FALSE,-11.904797475881,-33.3824658564221,"24"
export_AJP SEB_A5_A05_CD8 _2020-06-15,1480.873657,1.598481,134.990952,187.915894,142.554779,280.033691,147.809738,1788.523071,594.91864,137.121155,152.325302,FALSE,9.00727483201957,1.20786682819514,"9"
export_AJP SEB_A5_A05_CD8 _2020-06-15,385.423065,166.265198,313.027191,251.666077,142.218521,292.688141,41.992237,2286.882568,644.071045,223.119064,3362.632324,FALSE,0.31384127812267,-1.79759743210615,"9"
export_AJP SEB_A5_A05_CD8 _2020-06-15,257.597137,153.91922,900.196106,175.159134,1010.805603,1646.799194,145.669128,16026.076172,728.537476,332.544952,175.446625,FALSE,-20.9164680832159,-31.2352407645041,"2"
export_AJP SEB_A5_A05_CD8 _2020-06-15,4687.949219,134.196411,231.467224,94.425529,231.778137,641.249146,55.477524,394.43512,682.494324,254.598862,144.214188,FALSE,22.4889609078786,16.8324646331312,"15"
export_AJP SEB_A5_A05_CD8 _2020-06-15,61.865414,227.520706,2926.993652,196.780151,697.868591,751.41748,310.1604,2027.248657,128.893372,1145.35498,1228.803589,FALSE,-3.87862188900689,-19.2576288110834,"6"
export_AJP SEB_A5_A05_CD8 _2020-06-15,470.478424,187.281082,2060.821533,197.674332,1424.245117,2153.442871,147.293396,7927.027832,2231.979004,165.07486,113.025948,FALSE,-19.4650712904119,-34.6734162083837,"24"
export_AJP SEB_A5_A05_CD8 _2020-06-15,444.745636,153.387573,406.497375,266.183319,171.883301,1026.484009,329.382385,5738.340332,995.460693,113.124031,1813.829346,FALSE,-10.7805403087025,-22.8898568269587,"16"
export_AJP SEB_A5_A05_CD8 _2020-06-15,66.813805,190.720169,442.70697,75.327751,396.486816,681.986206,45.77409,2773.747314,148.740356,105.86676,2556.17749,FALSE,-4.7204074434451,-22.5866702490991,"16"
export_AJP SEB_A5_A05_CD8 _2020-06-15,-61.476635,132.308548,297.061066,175.734619,194.178558,172.15683,97.499535,754.965698,144.643921,564.46051,22362.25,FALSE,-6.98646065242231,47.2791865721211,"22"
export_AJP SEB_A5_A05_CD8 _2020-06-15,407.435333,76.729225,827.719482,275.357513,680.834412,1064.445435,91.493172,822.399475,36.419151,687.970215,1540.596802,FALSE,-6.29122907043168,-29.1942205974093,"16"
export_AJP SEB_A5_A05_CD8 _2020-06-15,-309.328552,217.167221,2159.821045,115.89563,154.475815,2468.48877,-88.968071,8223.425781,2538.458984,544.762817,14540.294922,FALSE,-37.8623191998604,-16.0802539937115,"24"
export_AJP SEB_A5_A05_CD8 _2020-06-15,445.669647,125.227036,631.811523,277.897827,582.818298,156.907486,61.353722,364.524506,105.847313,195.337769,855.858032,FALSE,6.69520499723673,-6.7990910108297,"11"
export_AJP SEB_A5_A05_CD8 _2020-06-15,422.004059,100.424202,1600.549316,144.473038,402.306183,1387.836792,70.335922,1906.035767,99.353783,435.108185,2180.716064,FALSE,-11.1525888311662,-28.022071730638,"24"
export_AJP SEB_A5_A05_CD8 _2020-06-15,1532.365845,142.379868,499.840454,879.838318,1256.076294,794.498779,128.396545,264.281921,639.606689,1706.419434,192.290802,FALSE,5.64855127015175,-17.9601894551001,"16"
export_AJP SEB_A5_A05_CD8 _2020-06-15,21.207384,90.100471,155.885345,394.542053,351.735077,148.264099,-44.348602,684.344788,2051.766846,-98.788773,136.315643,FALSE,5.25526694421123,-8.51919808076807,"9"
export_AJP SEB_A5_A05_CD8 _2020-06-15,415.264648,113.0495,615.661133,73.708511,590.040283,52.257629,138.655487,329.918823,526.091003,725.05426,26418.179688,FALSE,-7.51162001872925,49.1479202808665,"22"
export_AJP SEB_A5_A05_CD8 _2020-06-15,-249.934418,131.538498,674.109009,240.553055,1240.588623,1534.095459,21.551476,11087.486328,1327.932617,-90.918861,2282.770508,FALSE,-16.2640911826609,-31.9046276190853,"2"
export_AJP SEB_A5_A05_CD8 _2020-06-15,12.696736,139.37294,353.020325,194.077072,775.571167,1324.712524,32.560715,12836.8125,868.201477,103.131866,1186.462158,FALSE,-17.1300027467678,-28.7729108345708,"2"
export_AJP SEB_A5_A05_CD8 _2020-06-15,662.334351,74.003578,923.421326,8.204921,240.287445,737.16449,67.046082,2538.572998,339.594513,425.407074,9326.099609,FALSE,-7.3067165988868,19.1457264709534,"14"
export_AJP SEB_A5_A05_CD8 _2020-06-15,1350.216919,151.842606,390.278015,96.334854,-78.611656,512.180847,186.158966,5442.30957,-1.24402,913.579163,-0.720401,FALSE,-4.45672881872843,-10.9951779240306,"15"
export_AJP SEB_A5_A05_CD8 _2020-06-15,470.753296,120.750076,598.113037,244.764404,222.109299,28.853399,115.122948,1687.279663,574.710754,468.000183,-110.955627,FALSE,5.50184302800452,-4.74612790139405,"9"
export_AJP SEB_A5_A05_CD8 _2020-06-15,8607.236328,107.828865,181.593399,800.476196,1365.917358,231.369675,297.56015,352.099182,654.427429,12.366223,194.896942,FALSE,33.0465374135525,28.5030716018037,"23"
export_AJP SEB_A5_A05_CD8 _2020-06-15,219.545105,262.682343,3733.55957,546.967163,1137.04126,1889.491699,9.494633,680.002808,3371.350342,1231.416016,313.177826,FALSE,-13.649278683217,-34.4031482297591,"24"
export_AJP SEB_A5_A05_CD8 _2020-06-15,391.018921,131.363602,919.049805,471.715179,450.581055,1733.596191,19.294451,6744.712402,959.604553,399.315643,370.85495,FALSE,-14.2496935540799,-32.2549523697969,"24"
export_AJP SEB_A5_A05_CD8 _2020-06-15,512.431885,265.207092,699.031433,439.106445,553.878845,411.860718,1.956089,972.568359,587.796021,973.949951,388.616943,FALSE,2.45693444783007,-17.0935587200022,"16"
export_AJP SEB_A5_A05_CD8 _2020-06-15,477.574463,164.115829,2179.379395,230.411911,434.419373,2570.628906,253.120926,214.796341,2379.241943,429.626678,354.764526,FALSE,-16.6454250063368,-34.1929828785694,"24"
export_AJP SEB_A5_A05_CD8 _2020-06-15,980.748352,203.028412,299.62381,109.270287,558.90741,520.736267,22.565569,1787.556274,276.140045,1672.602539,257.060242,FALSE,1.07135642757802,-16.6570483815198,"11"
export_AJP SEB_A5_A05_CD8 _2020-06-15,881.948242,210.014191,905.466309,206.937149,761.43042,1095.299805,-16.370113,8400.669922,955.541565,668.348999,946.695679,FALSE,-8.8564753010458,-26.2210273373827,"13"
export_AJP SEB_A5_A05_CD8 _2020-06-15,-63.903824,14.502679,499.813995,51.265972,124.277527,2913.544189,449.901001,5813.996094,131.883255,177.869568,1242.021606,FALSE,-18.4760668387294,-33.101631236059,"24"
export_AJP SEB_A5_A05_CD8 _2020-06-15,5825.07373,57.955681,280.732086,156.66774,-41.330448,368.200714,6.003251,5693.705566,579.710693,284.716156,41.770748,FALSE,21.1996544562895,21.8853537639549,"15"
export_AJP SEB_A5_A05_CD8 _2020-06-15,256.338226,92.722847,1122.117676,958.308777,1311.598999,1579.382813,182.685593,-6.754704,505.869843,1539.883667,811.173706,FALSE,-10.5391407658138,-36.7555378039475,"16"
export_AJP SEB_A5_A05_CD8 _2020-06-15,480.366425,77.658752,355.040466,271.304779,539.352783,438.284637,105.894424,4110.189453,290.392792,611.253906,945.976929,FALSE,-1.8815729911643,-19.2182806285599,"11"
export_AJP SEB_A5_A05_CD8 _2020-06-15,1384.734863,330.004944,450.732697,465.047302,9.13543,191.337936,96.972588,9997.978516,1376.11853,571.633362,164.668121,FALSE,-7.37630130711238,-5.59171224695496,"15"
export_AJP SEB_A5_A05_CD8 _2020-06-15,21627.181641,139.986191,286.857788,1232.031006,2266.814941,2.925112,272.379822,324.458435,781.115967,828.258423,270.795776,FALSE,29.931826240596,35.3506881714863,"5"
export_AJP SEB_A5_A05_CD8 _2020-06-15,491.230286,109.385208,742.783752,288.374237,346.24881,266.602783,97.62146,1709.671753,873.62085,449.163574,358.389435,FALSE,2.52738796612026,-10.9642564585054,"9"
export_AJP SEB_A5_A05_CD8 _2020-06-15,16759.417969,61.290527,158.328384,2919.434082,2184.446777,-64.724686,78.374084,188.569427,-4.643768,896.163391,152.136978,FALSE,30.1542079591381,33.0625274021909,"5"
export_AJP SEB_A5_A05_CD8 _2020-06-15,237.867081,104.490936,288.688202,298.112885,813.477783,275.635529,30.956575,7721.897461,90.682579,1032.846069,212.970932,FALSE,-2.51120831031397,-19.6634105462827,"11"
export_AJP SEB_A5_A05_CD8 _2020-06-15,-211.423355,101.078201,217.015472,126.830711,202.792633,736.010132,58.52433,2.461681,82.119156,385.897522,763.066772,FALSE,-1.73839883746995,-24.2717869004739,"16"
export_AJP SEB_A5_A05_CD8 _2020-06-15,2880.123291,127.422363,319.515625,190.262955,158.624283,206.978928,78.007172,5242.018555,744.642273,435.859009,188.248306,FALSE,16.5374671783485,11.8437830532826,"15"
export_AJP SEB_A5_A05_CD8 _2020-06-15,11497.433594,157.279922,370.759735,70.066818,196.802704,86.87162,66.932625,10862.871094,-5.637258,1213.885376,251.692581,FALSE,26.161047700225,32.0164845971636,"5"
export_AJP SEB_A5_A05_CD8 _2020-06-15,1611.644531,140.536682,550.815186,186.245026,-0.462259,788.235107,-19.429056,2843.900391,295.782684,695.705078,2548.481201,FALSE,-2.99430897749748,-7.9325939193275,"16"
export_AJP SEB_A5_A05_CD8 _2020-06-15,-1548.268921,57.603073,2088.74292,156.101837,263.260315,2563.75708,163.409363,6356.151367,1228.711304,989.452515,42940.753906,FALSE,-12.5494442713082,39.294920707109,"22"
export_AJP SEB_A5_A05_CD8 _2020-06-15,1910.419067,76.021782,570.126465,190.769196,1019.835144,1017.032593,-26.85099,8363.398438,2139.969971,364.304962,4051.93457,FALSE,-15.2347447797817,-20.0571641495367,"15"
export_AJP SEB_A5_A05_CD8 _2020-06-15,781.408081,165.514786,570.828857,249.606918,625.445557,1156.124634,-77.505249,25121.386719,1087.228271,5393.935547,-111.254913,FALSE,-25.6451643755614,-24.5984924707302,"2"
export_AJP SEB_A5_A05_CD8 _2020-06-15,1596.532227,66.952003,293.519531,292.314819,543.305786,1139.61145,-6.24195,6601.808105,557.885864,441.070465,129.805679,FALSE,-10.4642743123005,-26.4848846757001,"16"
export_AJP SEB_A5_A05_CD8 _2020-06-15,211.626907,88.892601,208.784088,290.986877,85.461998,284.991425,61.972256,10503.595703,969.825012,284.534546,125.021843,FALSE,-11.2011072053097,-12.7870239094668,"6"
export_AJP SEB_A5_A05_CD8 _2020-06-15,166.925644,101.845665,983.060242,88.979782,254.346512,3248.628662,113.766708,1339.514648,87.157547,155.307343,2740.956787,FALSE,-22.8729967193096,-34.3538003586469,"24"
export_AJP SEB_A5_A05_CD8 _2020-06-15,125.853554,39.553036,194.707092,129.978592,276.817261,164.98201,153.004959,4070.409912,2318.891113,134.48764,170.816208,FALSE,-1.97021056669974,-4.96876136343839,"6"
export_AJP SEB_A5_A05_CD8 _2020-06-15,329.316956,151.649399,508.093506,411.618134,916.466064,766.649109,140.610168,4510.23877,2911.792969,702.013733,745.712952,FALSE,-4.96542040015511,-24.2137445305696,"16"
export_AJP SEB_A5_A05_CD8 _2020-06-15,1225.434448,195.821732,915.224792,177.118454,2893.929688,1469.403442,-957.812256,2168.868164,973.097778,74084.015625,-654.323303,FALSE,39.5262977301051,-33.929487878778,"27"
export_AJP SEB_A5_A05_CD8 _2020-06-15,83.509277,193.052658,856.74585,490.450348,226.417221,2350.759766,-175.129044,3888.4729,3615.424561,486.683075,12079.392578,FALSE,-32.9612849836529,-16.4156026267204,"7"
export_AJP SEB_A5_A05_CD8 _2020-06-15,986.563049,98.57737,707.490845,300.904724,2002.040894,862.09613,-46.336674,2828.205566,570.507751,41066.863281,-551.992737,FALSE,31.2647675183369,-34.4483345956857,"25"
export_AJP SEB_A5_A05_CD8 _2020-06-15,193.015778,190.578064,262.045013,310.044647,3207.765869,434.229095,131.540848,9271.625977,910.040283,-140.345825,238.776672,FALSE,9.08189183482008,-31.6029214666819,"11"
export_AJP SEB_A5_A05_CD8 _2020-06-15,1198.867188,174.859543,239.579529,84.975548,197.322647,920.555359,7.18053,1839.972168,100.558601,984.533447,255.873291,FALSE,-5.23775403608328,-21.1720477975865,"16"
export_AJP SEB_A5_A05_CD8 _2020-06-15,5752.382813,225.842575,364.70932,250.411591,1884.928345,104.223473,41.670536,276.371826,247.949005,2390.571045,183.183655,FALSE,32.7458341429937,21.2112514005947,"18"
export_AJP SEB_A5_A05_CD8 _2020-06-15,-11.822857,211.873596,1413.154297,261.815796,1159.496948,1923.422852,-18.426878,12383.674805,302.830292,990.690247,1932.047363,FALSE,-19.0022541217882,-33.5742640671319,"2"
export_AJP SEB_A5_A05_CD8 _2020-06-15,245.816071,38.382969,602.337891,256.947083,654.134155,68.931854,126.308624,406.434143,3736.197754,373.275085,12025.563477,FALSE,-5.34972244115666,32.7858042720356,"21"
export_AJP SEB_A5_A05_CD8 _2020-06-15,242.218948,95.66832,879.971924,494.413818,374.46225,310.523926,-49.403141,-89.62278,1709.913452,811.381226,472.235931,FALSE,4.98591300679427,-13.1512829067623,"16"
export_AJP SEB_A5_A05_CD8 _2020-06-15,3850.779785,168.430084,487.976349,327.215424,3602.003418,652.955566,-139.033737,-193.202347,225.757813,7692.178711,2577.119873,TRUE,35.4724294577718,10.6105267073327,"12"
export_AJP SEB_A5_A05_CD8 _2020-06-15,293.026306,117.77951,486.475037,176.180038,374.01004,1389.57373,26.845442,10993.449219,257.67804,1461.075562,340.328247,FALSE,-13.227054431232,-30.9230527066479,"2"
export_AJP SEB_A5_A05_CD8 _2020-06-15,287.641815,150.684799,540.439636,245.16188,267.790924,918.872314,-91.714294,7625.736816,391.766693,3558.265381,348.05484,FALSE,-4.45534756527213,-26.0295358687025,"25"
export_AJP SEB_A5_A05_CD8 _2020-06-15,338.372559,186.367401,6999.333496,334.815247,759.086243,3329.991455,330.897339,22082.0625,2523.720703,174.814163,509.96759,TRUE,-30.1095273684234,-38.0353571869086,"24"
export_AJP SEB_A5_A05_CD8 _2020-06-15,23.531807,126.836769,542.164185,262.783295,975.881897,1702.616455,270.073059,3684.703613,1054.90332,983.906433,1126.000122,FALSE,-13.7169613531353,-35.7837446601082,"24"
export_AJP SEB_A5_A05_CD8 _2020-06-15,1081.01355,342.31543,2190.14917,1003.590454,3411.07251,1150.720825,25.964664,927.771118,510.283936,2367.59082,822.113281,FALSE,-1.87498579906586,-34.013429536323,"15"
export_AJP SEB_A5_A05_CD8 _2020-06-15,190.878647,205.204178,303.112946,155.414215,40.575371,603.606506,3.01402,934.575562,1964.209351,271.027466,123.0448,FALSE,-0.90080832772941,-18.4199811663961,"16"
export_AJP SEB_A5_A05_CD8 _2020-06-15,242.602112,180.58194,522.88855,450.269409,865.415771,1103.806763,23.316725,1758.932129,674.982056,514.48407,450.661713,FALSE,-4.8098716283443,-30.0342852768138,"16"
export_AJP SEB_A5_A05_CD8 _2020-06-15,2689.023682,155.177414,901.049927,140.125351,180.617035,901.971558,-13.137582,9492.30957,1241.098267,294.500702,10947.487305,FALSE,-12.5493811195079,11.4218954853575,"14"
export_AJP SEB_A5_A05_CD8 _2020-06-15,177.223175,26.442749,688.107971,255.041779,1799.223267,1292.8302,66.011284,3403.633789,840.166321,38.307495,568.218567,FALSE,-8.97235351039589,-34.3165349516459,"13"
export_AJP SEB_A5_A05_CD8 _2020-06-15,191.68689,152.62117,325.082092,305.122589,574.263306,779.150391,66.960197,10203.076172,955.446655,908.461426,133.40416,FALSE,-8.86255341506573,-24.4505001440294,"16"
export_AJP SEB_A5_A05_CD8 _2020-06-15,1098.287109,108.072876,184.35025,130.264648,540.562622,1393.327148,94.823174,15.403591,-44.874302,271.409058,700.007141,FALSE,-10.5461413984215,-32.1314368065503,"24"
export_AJP SEB_A5_A05_CD8 _2020-06-15,485.506165,117.747086,462.474152,170.421143,-28.141216,152.452255,1.90819,4971.174316,0.289475,947.190063,132.803741,FALSE,-2.68631200382282,-11.1598871217598,"6"
export_AJP SEB_A5_A05_CD8 _2020-06-15,316.732269,143.005478,2993.23291,189.376648,617.418945,2759.509521,33.630001,14337.154297,3088.852051,364.61438,3465.683594,FALSE,-26.929691954805,-35.3389091129122,"24"
export_AJP SEB_A5_A05_CD8 _2020-06-15,391.876282,116.040871,935.804871,245.148117,358.249329,1150.848877,93.759331,11517.308594,1010.250732,894.442017,18549.703125,FALSE,-20.9486709925133,29.0182348249653,"10"
export_AJP SEB_A5_A05_CD8 _2020-06-15,15226.75,114.408684,341.89151,1005.660583,1001.143677,-90.434723,-17.122126,459.168671,270.983032,1074.981323,293.302795,FALSE,31.0462094753783,34.1682399896458,"5"
export_AJP SEB_A5_A05_CD8 _2020-06-15,12992.195313,226.041321,1118.123413,1394.763306,1649.399658,151.868256,4.407291,923.839172,763.566589,497.86261,654.861633,FALSE,32.602691496946,33.7431995216412,"23"
export_AJP SEB_A5_A05_CD8 _2020-06-15,20111.339844,216.661011,590.256897,694.780151,803.791016,11.910842,-151.201401,499.12439,708.95166,3314.67041,290.278198,FALSE,31.3596502592504,35.0384581125897,"5"
export_AJP SEB_A5_A05_CD8 _2020-06-15,2556.483643,146.229095,1866.157593,180.347076,298.984467,2073.60791,82.448502,1080.289795,269.922852,565.781738,10658.419922,FALSE,-19.2227790578744,-14.5599643892002,"24"
export_AJP SEB_A5_A05_CD8 _2020-06-15,603.574402,296.219604,1497.631348,152.556488,323.485962,1490.111816,16.523239,3216.627197,1072.464966,347.90448,404.793243,FALSE,-11.2398525009356,-27.520204487819,"24"
export_AJP SEB_A5_A05_CD8 _2020-06-15,-700.924805,133.031815,387.850769,132.456772,520.804382,336.452576,-78.578476,1801.974121,554.994141,627.639099,39603.488281,FALSE,-8.74917366669153,53.887506117226,"22"
export_AJP SEB_A5_A05_CD8 _2020-06-15,371.655518,111.638954,343.244141,206.058441,981.093018,1538.737183,56.261948,9509.290039,1946.348267,258.036682,89.288002,FALSE,-13.6387034433941,-33.1493153930073,"2"
export_AJP SEB_A5_A05_CD8 _2020-06-15,1523.879028,157.046555,460.059113,212.282272,91.763672,834.347168,-28.585228,1081.578613,221.160568,307.481567,6175.407715,FALSE,-1.54502310543638,4.95047977450035,"14"
export_AJP SEB_A5_A05_CD8 _2020-06-15,356.525513,125.967445,428.653107,273.770874,542.5495,254.439255,15.554675,2626.797363,1500.007568,249.036163,939.319336,FALSE,1.90614925275482,-12.959986587054,"11"
export_AJP SEB_A5_A05_CD8 _2020-06-15,-46.984001,48.484444,1489.660645,139.474625,32.635651,1196.589355,523.793274,34.084721,682.226746,355.247742,251.771942,FALSE,-10.4234974544185,-21.7424736952149,"16"
export_AJP SEB_A5_A05_CD8 _2020-06-15,21367.865234,77.868568,118.664207,3027.025635,2236.099365,28.275612,70.2565,159.771698,2376.806152,358.390991,366.047699,FALSE,30.1071273789195,34.8711028425723,"5"
export_AJP SEB_A5_A05_CD8 _2020-06-15,624.588196,110.912338,2503.543945,704.460449,2602.200928,1996.990234,69.770836,1916.247314,469.761505,474.219635,855.583374,FALSE,-18.6976739125855,-38.9212509721989,"24"
export_AJP SEB_A5_A05_CD8 _2020-06-15,63.9534,299.661041,2889.25293,495.385376,373.760132,1522.92041,219.717056,7139.180664,184.468842,733.705322,9739.723633,FALSE,-24.4412494444468,-21.6897619090685,"24"
export_AJP SEB_A5_A05_CD8 _2020-06-15,179.546188,158.541016,340.462036,190.596268,370.485077,591.634155,52.417847,615.62207,80.115799,498.869293,837.163818,FALSE,-0.462069959876621,-21.4257723590781,"16"
export_AJP SEB_A5_A05_CD8 _2020-06-15,26702.958984,122.860054,363.233734,933.722961,2149.580322,160.670074,-14.537004,545.749634,425.181061,2990.229736,22.448624,FALSE,29.6817312675444,35.4271445393984,"5"
export_AJP SEB_A5_A05_CD8 _2020-06-15,-13.057944,27.080141,406.07486,149.378906,230.37204,2063.971191,-34.423374,8004.189941,591.715027,52.351532,453.494629,FALSE,-18.230000820176,-32.4543029543074,"24"
export_AJP SEB_A5_A05_CD8 _2020-06-15,403.769165,143.455154,522.511414,321.027222,185.469162,509.225311,-46.32119,6716.70459,2188.661621,230.034393,7574.64502,FALSE,-9.9192554482291,8.85250340942226,"14"
export_AJP SEB_A5_A05_CD8 _2020-06-15,2178.540283,146.400208,1004.479675,288.674408,597.818237,1224.91333,-116.19278,8052.452148,2617.910156,772.458069,1360.577515,FALSE,-11.7300068626676,-19.992306721599,"15"
export_AJP SEB_A5_A05_CD8 _2020-06-15,-3299.957031,136.180649,1603.882568,333.452881,854.0672,-337.573303,-136.225662,516.408997,557.167786,5153.248535,80871.148438,FALSE,-12.0985135461804,59.0134027415067,"22"
export_AJP SEB_A5_A05_CD8 _2020-06-15,-355.827423,119.521683,468.589935,423.219025,364.077209,168.101944,225.421234,236.777847,3253.787598,359.799164,3185.030273,TRUE,-5.3085544958534,7.51061507081501,"9"
export_AJP SEB_A5_A05_CD8 _2020-06-15,-639.622437,65.711258,335.384125,184.31218,165.05658,131.903183,35.017281,1808.127686,149.787094,764.261353,48754.703125,FALSE,-9.77502403752196,55.0189072380477,"22"
export_AJP SEB_A5_A05_CD8 _2020-06-15,18666.238281,214.815964,439.193359,528.370056,1555.928101,126.761703,-67.107658,71.372238,312.549866,8907.250977,-56.936249,FALSE,29.8884576034835,34.1485703347311,"5"
export_AJP SEB_A5_A05_CD8 _2020-06-15,-72.359047,57.348373,357.624756,106.41967,878.442017,2622.733154,34.572834,6656.473633,592.652832,336.858948,805.949036,FALSE,-22.6499605477461,-36.3409244339392,"24"
export_AJP SEB_A5_A05_CD8 _2020-06-15,353.174438,206.591934,1933.288208,654.970642,131.929138,458.23233,36.120083,3401.730957,819.75238,368.799774,70.364586,FALSE,-1.41689918475125,-13.9622515175621,"6"
export_AJP SEB_A5_A05_CD8 _2020-06-15,31248.570313,178.412918,247.18132,962.702454,1263.744507,-120.786583,-53.487202,708.401062,582.514893,896.055908,645.34137,FALSE,29.924973568405,37.6618680004471,"5"
export_AJP SEB_A5_A05_CD8 _2020-06-15,4926.210938,8.211702,348.948334,708.054199,679.194824,144.78508,52.622601,172.980118,1037.202515,500.135437,325.955383,FALSE,26.7762893672758,17.6217629820124,"18"
export_AJP SEB_A5_A05_CD8 _2020-06-15,903.497314,82.304039,426.9664,200.433838,158.410278,804.330261,-29.94239,4267.334961,402.528931,261.743378,16473.509766,FALSE,-6.5553915145534,35.7345199180328,"14"
export_AJP SEB_A5_A05_CD8 _2020-06-15,22.145172,162.179962,309.087219,94.20475,150.30307,-64.184067,-27.568077,520.671021,40.101196,1295.764893,68.208656,FALSE,5.74327953499104,-8.93546211410393,"25"
export_AJP SEB_A5_A05_CD8 _2020-06-15,384.029144,-0.960978,384.256042,421.580994,899.158142,193.762009,102.687721,7622.328125,1036.64856,238.963959,-7.873609,FALSE,-2.79704357314542,-15.5053982579814,"11"
export_AJP SEB_A5_A05_CD8 _2020-06-15,768.42041,101.452049,265.391327,204.04306,159.95845,551.363159,8.651583,-61.228905,94.936218,449.43103,2622.813232,FALSE,-0.23633687078223,-10.1315291974338,"16"
export_AJP SEB_A5_A05_CD8 _2020-06-15,464.558685,116.456291,509.391541,2178.150635,304.939545,565.986145,-17.460461,12426.704102,721.550781,350.818573,168.85968,FALSE,-11.8984240173659,-19.7339864250657,"11"
export_AJP SEB_A5_A05_CD8 _2020-06-15,255.890686,98.982239,1229.408691,595.98053,325.281281,418.5961,-22.333204,-255.115646,718.231995,262.848358,416.412415,TRUE,2.34402562750325,-17.401074708662,"16"
export_AJP SEB_A5_A05_CD8 _2020-06-15,125.966827,145.871872,279.153503,345.381195,1125.612915,1015.826599,16.499422,1727.527466,885.872925,3080.319336,423.124329,FALSE,-1.04182437553732,-32.93735079358,"25"
export_AJP SEB_A5_A05_CD8 _2020-06-15,176.536301,123.113937,231.09938,102.525055,1255.774902,138.426697,119.403343,430.49704,757.210693,422.198334,240.135284,FALSE,10.4032875426424,-12.3640553531123,"11"
export_AJP SEB_A5_A05_CD8 _2020-06-15,95.949821,90.989998,-32.467525,80.865555,87.327332,141.165237,306.112213,-1131.157959,7653.034668,221.117554,3310.498047,FALSE,-19.0575159487746,14.6598328921894,"8"
export_AJP SEB_A5_A05_CD8 _2020-06-15,-6.190183,121.236855,338.047333,171.068481,1187.947266,3169.896973,134.604141,4814.723145,2583.616211,423.915741,99.039215,FALSE,-24.091171788134,-38.5585763860414,"24"
export_AJP SEB_A5_A05_CD8 _2020-06-15,1119.697998,126.672043,665.995483,207.135056,38.363815,557.653076,-3.366523,1612.404175,287.818634,576.21991,7476.087402,FALSE,-0.308640911878133,23.2257645553089,"14"
export_AJP SEB_A5_A05_CD8 _2020-06-15,375.306335,191.303284,254.814606,226.615814,441.244476,387.36264,28.409422,285.0047,144.255905,249.514313,756.533569,FALSE,2.04048179415391,-15.7099880660201,"16"
export_AJP SEB_A5_A05_CD8 _2020-06-15,809.803467,102.925827,231.926758,165.311661,-103.371185,222.029633,93.806274,1892.020752,-46.407825,1010.47406,0.134493,FALSE,4.00710311001041,-4.55407548561452,"6"
export_AJP SEB_A5_A05_CD8 _2020-06-15,1313.425903,257.768799,3640.858154,752.29071,2837.696289,3588.414551,339.407684,15012.961914,6152.708008,353.733551,11012.021484,FALSE,-30.4732145456662,-35.9555644068504,"24"
export_AJP SEB_A5_A05_CD8 _2020-06-15,3822.008789,185.207565,1291.923218,880.360657,2677.64624,414.661652,-55.125572,467.908234,630.717346,1378.800781,358.45816,FALSE,32.3019997674935,14.574939039738,"18"
export_AJP SEB_A5_A05_CD8 _2020-06-15,258.553314,213.383759,304.020294,806.686707,184.598495,436.986633,-10.175781,764.83374,686.034729,888.138184,572.695129,FALSE,1.85949181499053,-19.7878480678979,"16"
export_AJP SEB_A5_A05_CD8 _2020-06-15,43.712723,137.326508,793.22937,894.526001,1491.730591,1409.477173,59.299809,6570.773926,1045.085449,877.217285,195.463821,FALSE,-10.0047011659255,-35.1291904000296,"13"
export_AJP SEB_A5_A05_CD8 _2020-06-15,729.3302,3.798833,514.128357,170.360535,136.405212,1840.224243,90.599129,2750.7146,52.555809,404.558258,1970.972656,FALSE,-15.1826364277249,-31.3649990298336,"24"
export_AJP SEB_A5_A05_CD8 _2020-06-15,18884.582031,224.64418,1417.051147,291.025177,2693.908447,978.638123,70.988052,2.923611,134.597473,2373.381348,709.910889,FALSE,29.0160204231838,32.4477137586641,"5"
export_AJP SEB_A5_A05_CD8 _2020-06-15,184.750381,42.561108,428.042908,108.53878,504.474365,728.910217,85.216133,6567.811523,903.434265,106.330429,691.425659,FALSE,-6.42275131347928,-23.4637183964033,"16"
export_AJP SEB_A5_A05_CD8 _2020-06-15,553.372192,65.865631,331.316864,150.631104,-83.122475,472.914581,-106.614265,4118.466309,1047.508179,385.031097,152.659805,FALSE,-4.00992566839047,-12.4584521887354,"16"
export_AJP SEB_A5_A05_CD8 _2020-06-15,68.305229,202.486084,2378.502686,526.099609,771.55896,1698.156128,-100.013657,2823.27832,7449.386719,285.107758,556.259155,FALSE,-25.028074867623,-10.1468167287154,"24"
export_AJP SEB_A5_A05_CD8 _2020-06-15,174.345291,110.491447,284.898407,61.537804,765.608398,150.889755,78.381371,228.115128,26.624706,924.678711,1171.778687,FALSE,5.44275945931936,-11.0902120633593,"11"
export_AJP SEB_A5_A05_CD8 _2020-06-15,212.257019,80.642181,267.088074,135.31842,243.780579,673.604065,40.888226,127.817406,54.284515,767.515259,778.474243,FALSE,-1.12125468720128,-22.4580311179149,"16"
export_AJP SEB_A5_A05_CD8 _2020-06-15,9977.547852,100.902359,347.387604,192.455978,1628.519409,-22.183523,-62.9781,13.413116,230.952179,6935.285645,120.479202,FALSE,31.5153045439208,31.2572533808185,"12"
export_AJP SEB_A5_A05_CD8 _2020-06-15,2003.868042,17.474752,1301.513306,293.071381,459.400116,478.565033,291.45166,8881.130859,1310.375732,1062.132935,29206.501953,FALSE,-11.3604649400519,41.5800351395583,"22"
export_AJP SEB_A5_A05_CD8 _2020-06-15,1158.746948,198.959229,5904.208496,1079.04541,2635.601563,2204.283936,272.636963,30621.166016,7427.275879,944.523193,8671.516602,FALSE,-31.5839000463763,-29.570794979718,"24"
export_AJP SEB_A5_A05_CD8 _2020-06-15,1420.247925,183.357956,383.479645,581.374084,2446.900879,287.564911,-29.324696,-281.071686,728.766907,510.546112,260.304138,FALSE,27.377261801585,-5.13245877098846,"11"
export_AJP SEB_A5_A05_CD8 _2020-06-15,188.413177,51.726871,266.503662,37.353363,1122.875122,941.151794,-11.964084,1707.468872,1353.100342,394.756073,57.120541,TRUE,-6.1172492311292,-31.2304792814571,"16"
export_AJP SEB_A5_A05_CD8 _2020-06-15,171.380417,205.798813,372.060425,140.784775,555.471069,278.022644,81.622665,758.407349,-20.57127,2353.061279,5244.638672,FALSE,1.79955967205565,8.99592300935222,"11"
export_AJP SEB_A5_A05_CD8 _2020-06-15,711.590515,206.869293,2351.044434,216.800476,425.106293,9758.901367,85.17054,25327.804688,4248.887695,108.505508,547.360168,FALSE,-27.4928125346324,-44.1652455415433,"24"
export_AJP SEB_A5_A05_CD8 _2020-06-15,170.802094,132.429688,200.396683,139.150406,533.429932,379.720062,23.273586,164.279221,85.792671,532.55365,787.209595,FALSE,2.61561884293755,-17.9513646623867,"16"
export_AJP SEB_A5_A05_CD8 _2020-06-15,877.866516,116.867966,363.02597,462.848267,11.905371,103.468948,-43.9189,4288.058594,1195.938354,258.855591,105.774124,FALSE,5.27848291442828,-0.828154105516399,"6"
export_AJP SEB_A5_A05_CD8 _2020-06-15,2631.421875,217.93779,726.416504,33.040974,1976.060425,761.566772,-945.987366,285.822113,920.281006,48519.378906,-932.657227,FALSE,38.2959653542552,-38.2332064973577,"27"
export_AJP SEB_A5_A05_CD8 _2020-06-15,734.848206,115.2332,771.161438,447.668915,738.63385,816.551453,-45.674759,6789.939453,538.768555,11659.482422,214.936768,FALSE,11.568699671797,-35.6976406168692,"25"
export_AJP SEB_A5_A05_CD8 _2020-06-15,20.848438,53.810493,360.842865,59.951771,347.216675,852.686768,-1.547433,7963.625,143.499008,412.725037,953.87085,FALSE,-8.97513259102663,-23.0616353882839,"16"
export_AJP SEB_A5_A05_CD8 _2020-06-15,12804.223633,131.678879,534.069946,840.374878,3035.777832,288.480286,-58.799831,8.443309,1660.778931,1102.263916,234.720642,FALSE,32.566780030862,32.609130844654,"23"
export_AJP SEB_A5_A05_CD8 _2020-06-15,3086.122803,134.833786,513.204529,214.784332,149.17157,1010.807556,24.798338,2965.753906,220.133957,486.779266,8445.740234,FALSE,2.2440118518959,16.9914412514727,"14"
export_AJP SEB_A5_A05_CD8 _2020-06-15,4648.000977,82.291565,447.972778,98.810669,696.686157,377.393402,-48.896713,15254.5625,601.215393,74.977211,226.207336,FALSE,18.2860753667557,23.193547240784,"15"
export_AJP SEB_A5_A05_CD8 _2020-06-15,409.446594,137.887146,326.460785,224.345154,1047.048096,684.874451,-119.495163,4215.362305,603.173035,5070.199707,-49.710438,FALSE,7.42416220343761,-30.4632183099609,"25"
export_AJP SEB_A5_A05_CD8 _2020-06-15,3233.948242,122.825188,296.588409,986.158081,2182.990479,56.876591,63.867275,1404.695801,-11.380082,945.466125,-36.456276,FALSE,32.6057505329647,10.6080875931485,"18"
export_AJP SEB_A5_A05_CD8 _2020-06-15,714.673706,-10.678605,415.108154,190.967697,272.058044,1044.856812,-52.53952,17372.0625,1588.591797,154.154404,1090.2854,FALSE,-21.7472417898671,-22.0345066052395,"2"
export_AJP SEB_A5_A05_CD8 _2020-06-15,5896.082031,192.0215,923.472412,441.642487,2342.797119,471.666138,-16.716709,492.665283,104.836372,1428.28125,254.379715,FALSE,33.1199397540841,21.8972288199229,"23"
export_AJP SEB_A5_A05_CD8 _2020-06-15,856.020813,139.138504,453.700439,159.329971,194.177109,1344.697876,59.165356,11049.71875,54.558254,960.030151,106.275902,FALSE,-14.0233798658305,-27.5014353078831,"2"
export_AJP SEB_A5_A05_CD8 _2020-06-15,346.1185,322.498566,291.600555,171.706284,1602.733521,1938.764526,83.605064,-556.951111,1209.602661,490.58136,477.363373,FALSE,-15.0175758764019,-39.1369909263789,"24"
export_AJP SEB_A5_A05_CD8 _2020-06-15,909.760376,175.07518,1109.909546,-70.739273,2270.316162,1156.564453,-764.331238,1408.918701,305.8302,50829.804688,-441.983154,FALSE,37.3931914375309,-36.3806504751227,"27"
export_AJP SEB_A5_A05_CD8 _2020-06-15,747.084656,95.76474,102.913528,231.213531,821.515686,186.607758,100.965096,166.030746,808.030396,80.39959,27.146238,FALSE,10.1246556376907,-4.9283130369167,"11"
export_AJP SEB_A5_A05_CD8 _2020-06-15,6308.344727,107.059631,695.310181,213.163208,378.11441,773.48468,97.38224,10381.25293,714.904785,251.285004,181.146591,FALSE,18.7209349696482,23.3367624179002,"15"
export_AJP SEB_A5_A05_CD8 _2020-06-15,320.205597,68.782234,310.184204,303.315247,360.072144,137.917877,42.802959,1141.075317,235.756638,324.657013,817.557068,FALSE,4.52149885532108,-8.11011318454051,"9"
export_AJP SEB_A5_A05_CD8 _2020-06-15,150.892334,204.039017,519.967407,118.448128,515.025269,763.993713,8.092061,401.105377,368.393005,1454.348022,210.417435,FALSE,-0.815811372438281,-24.9281288637774,"16"
export_AJP SEB_A5_A05_CD8 _2020-06-15,-141.174866,34.57888,442.447235,98.111137,544.288269,193.384644,-2.760393,3993.426758,102.139519,627.682739,22079.9375,FALSE,-7.05636530898866,46.2163727339089,"22"
export_AJP SEB_A5_A05_CD8 _2020-06-15,1638.721436,231.280289,761.289856,1401.649902,1474.942993,480.395294,-28.109642,10608.016602,381.342194,3946.484863,206.388626,FALSE,11.3840847211698,-20.3274452809943,"11"
export_AJP SEB_A5_A05_CD8 _2020-06-15,33.379848,156.483017,296.168732,371.821594,1033.414185,186.573837,11.934982,9768.736328,-9.846276,249.005051,7228.621582,FALSE,-3.57162600701126,20.4182652020068,"10"
export_AJP SEB_A5_A05_CD8 _2020-06-15,305.362457,98.73262,-85.19278,173.918518,251.076523,76.892227,298.185852,-998.067017,6621.625977,405.439758,753.815491,FALSE,-13.9173290869102,9.24924738328314,"8"
export_AJP SEB_A5_A05_CD8 _2020-06-15,306.596344,50.272434,727.618408,433.236755,1319.943359,1247.531372,-68.783875,9448.347656,325.08548,266.343079,750.101624,FALSE,-10.8775755003137,-30.8492030440044,"13"
export_AJP SEB_A5_A05_CD8 _2020-06-15,888.207214,180.074356,397.678558,248.241638,101.690338,503.329498,75.550385,16598.064453,707.31488,292.349518,14.67957,FALSE,-18.6979153091813,-14.8720655795518,"6"
export_AJP SEB_A5_A05_CD8 _2020-06-15,2261.888184,150.469772,545.08313,340.521301,2323.081055,658.608093,37.417492,-216.026474,257.248779,1112.766968,121.352875,FALSE,23.7046082816937,-2.12229513997326,"15"
export_AJP SEB_A5_A05_CD8 _2020-06-15,53.355484,92.997704,181.930069,121.730171,361.145172,52.445583,-49.37999,-129.537964,920.957214,157.632874,44.325413,FALSE,6.5512857070854,-8.83778577418673,"9"
export_AJP SEB_A5_A05_CD8 _2020-06-15,-161.077393,121.526306,270.223297,71.737083,405.247437,620.530884,59.268097,235.560349,97.711502,306.194336,746.958923,FALSE,-0.27176562680966,-22.3512497073645,"16"
export_AJP SEB_A5_A05_CD8 _2020-06-15,2591.268311,156.491394,303.421539,90.96907,209.214996,18.770908,23.635008,6572.436035,930.213745,246.335632,98.523613,FALSE,14.5364859768315,11.4651156726309,"15"
export_AJP SEB_A5_A05_CD8 _2020-06-15,3614.384277,168.542542,328.988586,405.693695,1711.525879,136.351898,152.937866,1831.740601,1133.115234,324.261017,-63.385468,FALSE,28.1138007953645,13.9995254120676,"18"
export_AJP SEB_A5_A05_CD8 _2020-06-15,17781.986328,98.082039,366.633698,447.946472,1525.71936,313.933411,-81.083778,670.148193,113.695328,9816.34375,344.773743,FALSE,28.2660661472469,33.1597918525026,"5"
export_AJP SEB_A5_A05_CD8 _2020-06-15,84.722282,67.937988,173.148026,96.603477,1169.997559,2083.759277,-8.551743,7003.098145,2068.531494,364.613892,270.125153,FALSE,-18.3894162000881,-36.0164313684521,"24"
export_AJP SEB_A5_A05_CD8 _2020-06-15,347.525116,49.399124,990.463196,288.949158,726.819214,1056.156006,33.207363,15903.1875,571.911621,1087.800171,16499.193359,FALSE,-27.4507083783692,11.0873999450259,"1"
export_AJP SEB_A5_A05_CD8 _2020-06-15,551.879089,133.347351,1703.504028,378.369171,624.017822,1353.822998,47.243626,51429.367188,1021.21814,48.277496,230.264938,FALSE,-34.8029769289254,-22.5958617728138,"3"
export_AJP SEB_A5_A05_CD8 _2020-06-15,833.40033,109.360954,1964.170044,252.976166,506.34613,509.291626,-18.988934,6261.633789,1392.712646,335.15564,16099.573242,FALSE,-6.30929656573148,36.6492077982947,"14"
export_AJP SEB_A5_A05_CD8 _2020-06-15,9591.113281,158.411591,424.008026,561.702698,1625.337158,69.412193,-7.181148,270.848511,269.739014,925.086304,115.259666,FALSE,33.1479450603278,31.4797244001925,"23"
export_AJP SEB_A5_A05_CD8 _2020-06-15,281.819641,50.056915,676.647339,281.001526,1165.958374,4993.171387,-37.51976,8130.365723,3594.130859,2116.503174,9393.964844,FALSE,-27.8866571338392,-45.6751704948831,"24"
export_AJP SEB_A5_A05_CD8 _2020-06-15,2450.079834,472.907898,1090.155151,611.305969,2313.094727,788.833984,-20.003569,16534.679688,1031.94519,314.847443,120.334465,FALSE,-9.0791291135586,-18.8229067264578,"15"
export_AJP SEB_A5_A05_CD8 _2020-06-15,330.503021,21.896952,1299.502441,814.558899,1310.157837,384.003754,-15.615682,1138.836182,997.559387,855.896667,292.473969,FALSE,6.88646789727305,-18.8704371607164,"11"
export_AJP SEB_A5_A05_CD8 _2020-06-15,1411.954468,130.60408,282.723236,160.844894,308.902252,338.630676,100.101845,1401.862427,233.922913,145.161713,1626.838135,FALSE,9.86729635811367,2.02689331398805,"9"
export_AJP SEB_A5_A05_CD8 _2020-06-15,647.789795,90.113068,894.160156,111.167458,1510.606323,134.879333,-60.388184,3845.164063,1016.062073,828.640015,114.618629,FALSE,8.84662095239913,-12.2647591881489,"11"
export_AJP SEB_A5_A05_CD8 _2020-06-15,757.887207,156.156357,758.097778,69.368462,1102.195679,312.468079,-67.376183,7682.994141,217.408936,13244.935547,33.053608,FALSE,19.9615278109577,-34.1546997473338,"25"
export_AJP SEB_A5_A05_CD8 _2020-06-15,183.915649,-19.424036,95.528267,210.211792,736.749817,184.388672,59.738472,2282.709473,1786.559204,-117.673721,-5.144083,FALSE,4.53638726363992,-8.59804159656002,"9"
export_AJP SEB_A5_A05_CD8 _2020-06-15,3017.756592,90.739342,793.478088,1886.474243,1235.395386,980.52533,-98.965729,18239.919922,2356.355713,795.639771,232.187408,FALSE,-8.64573464942548,-13.2392838485968,"15"
export_AJP SEB_A5_A05_CD8 _2020-06-15,1129.139648,50.480206,470.314484,525.047607,24.495108,191.295319,22.415405,2628.357178,1165.18811,407.358368,1063.646606,FALSE,9.01237494731737,1.8743770907249,"15"
export_AJP SEB_A5_A05_CD8 _2020-06-15,-104.490669,165.826584,358.295319,126.15152,508.052307,723.205139,40.607712,65.048309,44.223698,253.999344,897.788513,FALSE,-1.05573905387807,-24.3927709854235,"16"
export_AJP SEB_A5_A05_CD8 _2020-06-15,439.260223,92.924461,291.157745,150.573425,952.869141,1726.595093,4.496233,6723.663574,1607.186401,343.878235,2498.135742,FALSE,-14.2840585967209,-33.6133330989352,"24"
export_AJP SEB_A5_A05_CD8 _2020-06-15,11624.624023,127.522461,1711.301392,487.837402,4637.440918,872.998596,22.278179,286.365417,297.111389,926.871826,162.815994,TRUE,31.4467357896058,32.6547203870247,"23"
export_AJP SEB_A5_A05_CD8 _2020-06-15,883.788269,168.979462,800.238342,47.015667,1103.048462,1232.525146,-243.712082,2932.342041,321.755859,27792.064453,-419.205811,FALSE,24.6560934343382,-38.7007543123937,"25"
export_AJP SEB_A5_A05_CD8 _2020-06-15,491.564545,98.41317,613.088196,449.640656,644.672424,420.150604,-5.883038,-42.561298,495.899933,801.203308,19346.521484,FALSE,-6.59499019697268,44.4651195027036,"22"
export_AJP SEB_A5_A05_CD8 _2020-06-15,205.762009,5.356096,412.36554,103.863266,1547.734741,1689.738525,-14.813846,3855.382813,1849.454712,108.5812,1815.858154,FALSE,-13.4926456424794,-35.7021049775167,"24"
export_AJP SEB_A5_A05_CD8 _2020-06-15,355.482025,150.454666,298.618469,383.558655,1302.510986,369.159607,-27.176584,1470.596313,354.168335,1227.913696,575.899597,FALSE,7.57029640756113,-21.401066615609,"11"
export_AJP SEB_A5_A05_CD8 _2020-06-15,40.89043,70.831421,46.457203,81.02861,674.106628,1514.150879,-47.31065,6900.590332,5957.132324,149.67868,224.852814,FALSE,-27.5658517335496,-12.7375472452009,"2"
export_AJP SEB_A5_A05_CD8 _2020-06-15,598.328857,140.48436,652.190552,274.925964,58.427715,408.729218,31.260738,585.391113,538.443604,375.524292,8632.412109,FALSE,-0.416915737586916,26.8110948730046,"14"
export_AJP SEB_A5_A05_CD8 _2020-06-15,151.744507,90.833794,256.675507,201.327744,270.954712,904.982971,54.304337,11352.8125,8542.008789,606.16571,6376.505859,FALSE,-33.0938783660506,6.54923990623506,"1"
export_AJP SEB_A5_A05_CD8 _2020-06-15,654.91217,112.900406,198.323685,245.009842,1016.516235,117.144714,-116.794655,2165.39209,514.373535,1439.340088,256.989899,FALSE,9.49173831738957,-10.9325083216346,"11"
export_AJP SEB_A5_A05_CD8 _2020-06-15,8667.757813,154.904297,632.575012,1454.437256,1395.58313,-28.654985,1.206337,1117.196777,159.340607,1445.06543,603.613586,FALSE,31.6733948832619,28.0875129333385,"23"
export_AJP SEB_A5_A05_CD8 _2020-06-15,630.538208,139.597015,486.984222,377.303802,3588.008057,1103.684082,-17.615673,3334.087891,1675.938965,379.570862,396.177795,FALSE,-1.21011801664815,-37.9029699205477,"13"
export_AJP SEB_A5_A05_CD8 _2020-06-15,1509.466309,107.854294,618.224365,149.25354,-96.101616,253.228607,39.358913,7680.745605,-29.257011,896.720459,30.94997,FALSE,-1.53159612915056,-1.78383801828789,"6"
export_AJP SEB_A5_A05_CD8 _2020-06-15,628.244019,166.683487,515.745544,162.816299,899.218384,791.295288,5.893245,2898.074951,141.790161,4462.057617,214.025314,FALSE,1.60894286864365,-29.3954260420436,"25"
export_AJP SEB_A5_A05_CD8 _2020-06-15,358.90387,-11.617554,942.943848,168.129959,553.559753,1077.733887,-53.957657,6081.760742,2393.733154,261.432953,3376.400879,FALSE,-10.8836007846806,-23.8944049047155,"2"
export_AJP SEB_A5_A05_CD8 _2020-06-15,2180.215088,135.319901,360.359528,101.410805,410.29837,-282.092804,-207.392258,-200.765579,74.809258,4505.158203,69757.085938,FALSE,-12.7885627082482,59.9109048113086,"22"
export_AJP SEB_A5_A05_CD8 _2020-06-15,455.359406,84.065002,268.302368,110.638847,212.053284,311.798676,10.718652,861.99408,247.710724,85.923355,9594.633789,FALSE,-0.176838261816693,29.0408227819548,"14"
export_AJP SEB_A5_A05_CD8 _2020-06-15,298.419983,116.382149,147.053772,142.725296,282.943665,864.72644,325.467621,949.090149,4401.67334,189.163864,16600.851563,FALSE,-12.6156351791344,33.3477519214005,"21"
export_AJP SEB_A5_A05_CD8 _2020-06-15,1693.421387,106.120697,282.479492,237.391052,-82.414993,119.724846,93.078377,5288.619629,734.262329,364.49585,143.705368,TRUE,12.2156387950865,9.40098809760138,"15"
export_AJP SEB_A5_A05_CD8 _2020-06-15,6415.643555,150.671051,399.132416,1879.545898,3998.16626,1607.802734,103.33239,364.554382,633.684875,622.409424,384.473663,FALSE,23.9799306903878,8.09962194540172,"15"
export_AJP SEB_A5_A05_CD8 _2020-06-15,537.947327,107.690659,328.316711,92.729706,759.953735,1079.918457,105.496094,6057.499512,35.01004,405.185913,1065.184204,FALSE,-8.43469025980516,-29.8545459681996,"16"
export_AJP SEB_A5_A05_CD8 _2020-06-15,154.300217,188.774918,116.857811,64.415039,366.480499,1458.939941,36.331852,6888.133789,2041.098633,236.655792,-58.216145,FALSE,-11.3659858792291,-31.2803784312579,"2"
export_AJP SEB_A5_A05_CD8 _2020-06-15,4398.212891,112.765228,264.139496,681.304016,1283.953003,183.361755,20.371626,10.861971,364.095184,941.824768,757.562256,FALSE,29.3915256635424,15.5750460602722,"18"
export_AJP SEB_A5_A05_CD8 _2020-06-15,236.376038,77.972145,279.96109,94.053955,877.712769,1143.641968,58.805798,-316.859253,92.38768,467.699524,935.683167,FALSE,-6.32450932420709,-30.7901581697358,"16"
export_AJP SEB_A5_A05_CD8 _2020-06-15,1566.510254,147.077438,322.479401,878.431885,184.130264,209.190659,97.629738,5229.194824,5638.689941,861.104858,8952.900391,FALSE,-7.10754465582967,28.9928108344079,"1"
export_AJP SEB_A5_A05_CD8 _2020-06-15,4500.255371,147.740646,2098.342285,425.07016,1457.911743,111.32637,-115.668137,406.424988,124.203033,5326.153809,1163.506592,FALSE,25.9963782700882,14.7132851549347,"18"
export_AJP SEB_A5_A05_CD8 _2020-06-15,345.740601,159.907166,304.035889,206.97168,129.461075,131.605652,-17.133549,548.676453,1290.382813,465.222778,216.214188,FALSE,5.20479129884373,-8.10854627467241,"9"
export_AJP SEB_A5_A05_CD8 _2020-06-15,365.249634,179.6707,2662.095703,565.998047,600.900085,1518.066406,-22.592522,29603.564453,1743.382202,457.751221,87.620918,FALSE,-31.6336583967517,-25.6048178240773,"24"
export_AJP SEB_A5_A05_CD8 _2020-06-15,1158.856201,211.228577,393.64743,341.240051,41.921169,340.15976,44.596951,6445.566406,147.174088,1525.754028,136.717682,FALSE,-2.03801188035875,-10.2336427154965,"6"
export_AJP SEB_A5_A05_CD8 _2020-06-15,97.638344,189.96846,352.727234,643.19635,1998.405029,189.652481,28.187593,5741.859863,628.700745,214.549957,59.110214,FALSE,13.0208722670853,-21.3718977811097,"11"
export_AJP SEB_A5_A05_CD8 _2020-06-15,1310.062378,196.787735,767.687134,141.140457,378.483887,278.820648,-27.686047,2371.185059,419.338898,994.780762,28996.033203,FALSE,-8.50710005004189,51.1123949566999,"22"
export_AJP SEB_A5_A05_CD8 _2020-06-15,626.316284,244.860245,1461.373779,287.685822,1545.490234,1166.083496,76.780563,4911.841309,139.093628,1043.796997,600.123962,TRUE,-7.76121928814852,-33.4388013872599,"24"
export_AJP SEB_A5_A05_CD8 _2020-06-15,359.129242,165.832169,1387.726196,211.85994,389.760345,2034.341431,68.536942,18980.224609,680.500854,318.160858,82.478638,FALSE,-25.9351497812186,-29.7646958004278,"2"
export_AJP SEB_A5_A05_CD8 _2020-06-15,890.324951,173.975616,279.712341,211.136978,1676.451904,73.790573,-17.290443,2482.240479,458.173523,1181.915161,506.744781,FALSE,16.5547344204801,-9.31958842515394,"11"
export_AJP SEB_A5_A05_CD8 _2020-06-15,1449.11853,78.752365,258.503662,166.399948,18.930696,167.181,-4.15613,4293.885742,396.731384,851.97583,6944.541992,FALSE,4.53694992062739,26.4464293913847,"14"
export_AJP SEB_A5_A05_CD8 _2020-06-15,980.196228,198.336319,543.107788,213.169006,13.794757,805.870667,99.689247,5143.538574,118.063255,378.473602,4285.379395,FALSE,-10.660565680235,-17.7243581279576,"16"
export_AJP SEB_A5_A05_CD8 _2020-06-15,271.26709,101.528831,207.069794,134.68367,477.371735,416.091949,0.903037,48.328339,124.627739,318.885254,747.81134,FALSE,1.78687397287214,-16.9417109650217,"16"
export_AJP SEB_A5_A05_CD8 _2020-06-15,166.974915,145.953751,2104.97998,180.682602,590.7276,896.575684,64.209793,5390.49707,345.280762,418.117798,25787.974609,FALSE,-7.29766871554397,44.7487750153825,"22"
export_AJP SEB_A5_A05_CD8 _2020-06-15,404.246307,135.109116,1069.922241,283.058014,2766.244629,1027.96582,-27.338364,1985.427612,670.039063,3395.034668,25.425526,FALSE,2.08757597000231,-35.7647566184215,"13"
export_AJP SEB_A5_A05_CD8 _2020-06-15,17554.603516,210.069565,918.091125,1187.252075,2555.955566,237.411255,40.279144,-55.295643,202.024445,1032.063843,103.878738,FALSE,31.599194460253,33.8443846078574,"5"
export_AJP SEB_A5_A05_CD8 _2020-06-15,9581.927734,100.954193,1279.348267,2053.085938,2165.928955,573.743835,196.442169,168.897125,531.697327,5999.929199,161.444565,FALSE,32.3426906568542,26.7407624082072,"23"
export_AJP SEB_A5_A05_CD8 _2020-06-15,1278.005005,106.004646,504.254272,158.489258,38.482815,478.501831,-25.258713,17716.558594,13.948847,1352.817993,273.049988,FALSE,-19.6534619964692,-15.0562391201365,"6"
export_AJP SEB_A5_A05_CD8 _2020-06-15,2317.798096,153.348007,1703.195557,246.947906,670.72699,1793.899658,18.50839,4003.724121,710.461609,1873.499023,6917.806641,FALSE,-16.0232243932983,-20.7882858893796,"24"
export_AJP SEB_A5_A05_CD8 _2020-06-15,263.437042,105.045952,243.877701,52.845963,129.580322,653.244934,60.76585,16.226877,94.712387,243.493515,726.961731,FALSE,-1.76374781492295,-20.6113030908335,"16"
export_AJP SEB_A5_A05_CD8 _2020-06-15,151.182281,220.568893,575.133057,540.766357,2509.321045,334.123016,409.88504,1771.811035,146.74408,1141.528198,552.359009,FALSE,16.0842193127172,-9.67866730599108,"28"
export_AJP SEB_A5_A05_CD8 _2020-06-15,139.98912,209.400772,1404.03125,220.10936,515.653687,495.664673,143.125534,3375.882568,117.546677,1357.382446,385.592834,FALSE,-0.589300477116983,-19.5340328328362,"6"
export_AJP SEB_A5_A05_CD8 _2020-06-15,14167.723633,210.692017,285.108185,1025.34082,3610.233398,644.065674,403.063934,-24.935944,707.269287,998.986328,221.613327,FALSE,28.5611238242947,31.8103036725956,"23"
export_AJP SEB_A5_A05_CD8 _2020-06-15,352.730743,140.940735,600.698425,623.412537,367.637329,278.498474,-50.372917,2513.692139,1165.153687,336.678467,249.011658,FALSE,2.25640613391536,-14.1121799851286,"11"
export_AJP SEB_A5_A05_CD8 _2020-06-15,1075.997925,159.057327,463.474274,-3.035579,1235.489136,2260.115479,-502.557098,119.219116,193.810852,22332.458984,-72.449677,FALSE,7.71066862744472,-34.1843189405726,"25"
export_AJP SEB_A5_A05_CD8 _2020-06-15,-331.272858,214.153,1087.659546,768.607849,881.07959,426.496307,152.983749,189.200668,690.363525,871.731262,1702.633423,FALSE,4.69011694451802,-15.8161552903374,"11"
export_AJP SEB_A5_A05_CD8 _2020-06-15,561.599731,3.334489,330.797058,186.64093,181.250839,710.987427,116.553764,1189.369629,307.283966,1228.334839,245.584106,FALSE,-2.10874909696937,-23.1385028082152,"16"
export_AJP SEB_A5_A05_CD8 _2020-06-15,826.698975,173.45845,1008.441895,248.683395,82.954033,1875.577515,252.071274,5834.536621,229.235657,1367.911011,13902.862305,FALSE,-38.6871426385197,-13.8427150713098,"14"
export_AJP SEB_A5_A05_CD8 _2020-06-15,1103.051392,123.88755,376.317902,229.835327,175.442505,420.618591,74.152611,3622.568848,129.513535,440.298767,14181.163086,FALSE,-4.41534203308577,35.7891010423972,"14"
export_AJP SEB_A5_A05_CD8 _2020-06-15,699.356079,113.75293,1179.183594,204.82074,167.108337,815.463684,-22.634064,1728.378784,700.570129,120.293396,1273.014038,FALSE,-5.18094665983186,-18.8570965736727,"16"
export_AJP SEB_A5_A05_CD8 _2020-06-15,2065.886719,51.734863,246.445389,152.821564,253.055679,257.825562,-18.936247,3350.168701,1960.654419,323.757477,557.659668,FALSE,11.5448890922699,7.33031059565371,"9"
export_AJP SEB_A5_A05_CD8 _2020-06-15,1914.988892,90.41996,300.073242,168.271515,578.991577,253.687851,76.455635,2224.07959,2981.927734,1841.424072,37652.980469,FALSE,-10.7363953512149,51.5890022632428,"22"
export_AJP SEB_A5_A05_CD8 _2020-06-15,11314.038086,171.571335,1989.362793,1890.500732,2039.924438,382.214661,-70.70311,1221.577637,2123.926514,1075.345947,134.829575,FALSE,34.8393604619168,32.8853481494771,"23"
export_AJP SEB_A5_A05_CD8 _2020-06-15,796.539978,168.554321,343.290649,53.563118,208.455719,138.985748,4.097951,4350.536621,15.523772,208.442398,912.163269,FALSE,-0.267053392810507,-5.66482123287762,"9"
export_AJP SEB_A5_A05_CD8 _2020-06-15,342.731689,55.243061,320.551147,52.174393,136.660141,31.657619,2.117181,334.783325,54.731373,471.133636,6218.496094,FALSE,0.968803020482476,18.3671890844038,"14"
export_AJP SEB_A5_A05_CD8 _2020-06-15,526.864197,129.302689,2226.296387,577.015442,730.829102,2113.241943,-62.075325,6990.813965,1291.90564,1042.564697,273.964508,FALSE,-18.5836940308869,-33.3234139108699,"24"
export_AJP SEB_A5_A05_CD8 _2020-06-15,-277.815735,126.975273,140.164078,202.123413,965.828918,414.086884,29.175573,917.929504,94.197945,489.610535,1730.136719,FALSE,3.93515895529576,-18.4410307485468,"11"
export_AJP SEB_A5_A05_CD8 _2020-06-15,55.41132,16.778002,1251.742065,87.945152,273.35556,1972.832153,304.254395,-352.055969,491.970093,387.933289,1273.942871,FALSE,-14.4120475112655,-32.3254161347298,"24"
export_AJP SEB_A5_A05_CD8 _2020-06-15,841.56189,34.346107,476.097198,35.462563,25.874006,118.772026,43.271633,11152.870117,166.233673,501.197205,1660.986572,FALSE,-13.2957400404562,-10.4987840984113,"6"
export_AJP SEB_A5_A05_CD8 _2020-06-15,17212.845703,179.648438,799.514526,360.948853,2125.88916,594.192322,84.676735,-35.786026,445.073883,1999.616943,436.238861,FALSE,29.3932414901495,32.8344519868633,"5"
export_AJP SEB_A5_A05_CD8 _2020-06-15,10.497422,18.173414,177.582367,280.518005,288.282379,1015.787415,169.047623,2557.20459,1371.309937,465.194611,370.564453,FALSE,-6.22008427518409,-27.0905445793716,"16"
export_AJP SEB_A5_A05_CD8 _2020-06-15,494.036835,231.242554,2657.973389,450.173096,950.614197,156.864639,143.753815,21916,2596.674316,786.583496,6948.6875,TRUE,-32.2028176104637,-17.6850335700418,"24"
export_AJP SEB_A5_A05_CD8 _2020-06-15,9467.323242,137.72496,405.438721,523.358215,1405.995117,254.421768,-49.081375,35.961327,582.849487,1395.842407,112.580879,FALSE,32.2873099726873,30.2602286509083,"23"
export_AJP SEB_A5_A05_CD8 _2020-06-15,65.848183,41.201015,330.086578,185.869965,465.391266,1571.058228,46.33075,14366.506836,1394.261719,296.590179,57.504135,FALSE,-20.8839360997005,-29.7199366742591,"2"
export_AJP SEB_A5_A05_CD8 _2020-06-15,6368.926758,147.986343,369.45163,1797.042969,1749.872437,78.059044,-73.012451,412.137756,258.40451,1104.015991,-73.603722,FALSE,34.6072333573539,22.1606883178832,"18"
export_AJP SEB_A5_A05_CD8 _2020-06-15,733.871033,89.598389,348.834625,70.521858,222.122482,123.515892,41.933292,1127.8573,52.081482,188.996857,2582.019043,TRUE,4.4467794335633,1.493130081149,"9"
export_AJP SEB_A5_A05_CD8 _2020-06-15,196.624741,227.218018,599.352844,498.273285,740.831238,599.122375,43.912487,1865.473145,394.043762,1642.519165,800.657043,FALSE,1.14389702853985,-25.4362303078323,"11"
export_AJP SEB_A5_A05_CD8 _2020-06-15,372.893219,102.413177,263.583191,218.513489,700.39679,284.009491,120.736099,8972.975586,559.358093,174.336243,105.617485,FALSE,-7.72676277929189,-15.3720509439164,"11"
export_AJP SEB_A5_A05_CD8 _2020-06-15,575.247559,87.647293,381.19223,236.952209,185.475052,340.829498,-30.081316,11723.264648,229.867401,1259.512695,-38.932133,FALSE,-11.6625416754209,-13.3487692765684,"6"
export_AJP SEB_A5_A05_CD8 _2020-06-15,355.335205,29.607477,434.244659,91.855392,984.52655,1418.100464,-21.302914,6054.791016,596.594971,134.55838,36.31963,FALSE,-11.2735251048777,-32.1802449233465,"2"
export_AJP SEB_A5_A05_CD8 _2020-06-15,1327.703369,239.821045,165.699066,569.89856,493.188507,209.943695,-169.298615,944.204102,4464.429688,526.795532,117.395386,FALSE,-4.37696921110518,1.59185034434812,"8"
export_AJP SEB_A5_A05_CD8 _2020-06-15,905.369873,118.951431,5123.322266,204.910263,196.795441,1045.592773,47.208698,11218.706055,309.105011,3256.034668,591.791748,FALSE,-14.5231221691767,-14.5943108567486,"24"
export_AJP SEB_A5_A05_CD8 _2020-06-15,-18.994419,93.982193,599.615234,126.052551,133.502304,532.127441,77.673531,3081.130615,88.007744,203.598129,1646.122314,FALSE,-3.70542755414404,-18.1482220239708,"16"
export_AJP SEB_A5_A05_CD8 _2020-06-15,1336.693604,225.794144,1909.449341,755.485046,1078.262939,246.61348,-45.286758,19193.697266,1492.687378,1905.514404,25703.775391,FALSE,-17.6639908499343,25.5577991637249,"1"
export_AJP SEB_A5_A05_CD8 _2020-06-15,98.708488,193.333893,327.46933,487.796234,376.784973,97.901428,32.198685,-129.186798,93.474075,499.638824,722.277039,FALSE,6.16375013933929,-9.22662842968284,"9"
export_AJP SEB_A5_A05_CD8 _2020-06-15,30240.59375,181.436249,284.52533,383.269257,1815.372192,57.053787,52.70396,677.419495,343.737091,490.66864,1033.384521,FALSE,29.1880494591603,36.9227741970768,"5"
export_AJP SEB_A5_A05_CD8 _2020-06-15,196.303131,-47.884304,110.109009,354.450165,1433.58667,64.951584,29.005886,136.155701,1010.735229,393.768921,321.639252,FALSE,14.9532439566623,-14.3105244348663,"11"
export_AJP SEB_A5_A05_CD8 _2020-06-15,166.075043,71.99044,252.878082,200.925751,1086.585449,2662.510986,-12.843494,23346.326172,49.418694,1067.933594,172.699936,FALSE,-26.7919351179144,-32.6709041823404,"2"
export_AJP SEB_A5_A05_CD8 _2020-06-15,160.37883,133.824173,519.790588,373.489319,839.462463,127.057526,10.325281,16960.351563,621.157593,185.467499,250.409515,TRUE,-29.0917219796447,-18.3315971131915,"6"
export_AJP SEB_A5_A05_CD8 _2020-06-15,512.368591,145.742279,1103.419922,298.054779,956.131409,1269.067261,2.939694,10060.746094,807.760925,1380.105225,36263.894531,FALSE,-9.4098924639368,46.7703044527148,"22"
export_AJP SEB_A5_A05_CD8 _2020-06-15,173.00296,-10.656528,437.360107,242.746658,528.02478,-55.991619,35.99836,222.615387,167.074219,1974.687866,12134.330078,FALSE,-1.87186720620537,36.0715517952187,"14"
export_AJP SEB_A5_A05_CD8 _2020-06-15,392.446564,165.585251,1340.118774,152.614731,205.569183,1893.324219,16.727045,16593.603516,961.25415,472.463531,7.842603,FALSE,-24.3958969288927,-28.6041634394874,"2"
export_AJP SEB_A5_A05_CD8 _2020-06-15,146.01062,145.520477,302.845001,0.075521,1169.369141,1735.119873,-368.451843,43.885246,406.62442,30139.234375,218.128769,FALSE,23.1937017857363,-35.4904737855941,"25"
export_AJP SEB_A5_A05_CD8 _2020-06-15,1356.141846,108.127075,699.530945,207.198471,1027.596802,184.512009,143.329346,4173.718262,375.049225,1597.97583,160.994659,FALSE,8.74939975980204,-4.48680700339671,"11"
export_AJP SEB_A5_A05_CD8 _2020-06-15,184.719147,102.815758,760.571167,134.109634,950.094727,1373.385986,10.33566,3342.033691,1295.936768,56.943302,219.085693,FALSE,-9.41748655506358,-31.8810619608778,"24"
export_AJP SEB_A5_A05_CD8 _2020-06-15,4009.892578,204.696091,915.053589,572.011353,929.895813,2727.572266,163.396423,4103.776367,331.937897,744.249512,991.441162,FALSE,-18.742825509384,-32.0785743875978,"15"
export_AJP SEB_A5_A05_CD8 _2020-06-15,322.159393,149.832886,1587.467407,142.020096,269.010193,1889.885742,28.752142,4712.496582,4215.354492,382.44342,4389.385254,TRUE,-21.5033946435378,-35.4356741900634,"2"
export_AJP SEB_A5_A05_CD8 _2020-06-15,1057.379395,133.594055,727.570801,233.590363,150.535461,2142.059326,36.04929,5494.33252,765.500122,234.311539,6153.794922,FALSE,-19.1010258016299,-30.2028771931597,"24"
export_AJP SEB_A5_A05_CD8 _2020-06-15,245.685486,109.731575,320.181488,84.654572,192.136414,409.732117,2.36131,6542.376465,110.135056,378.429626,4112.728027,FALSE,-7.59341678757588,-12.4143792496864,"16"
export_AJP SEB_A5_A05_CD8 _2020-06-15,7663.06543,228.434753,598.749634,900.931458,2127.651855,257.998138,-304.804291,3.341281,183.519974,35013.082031,656.196899,FALSE,26.9841117913794,-22.5866859123623,"12"
export_AJP SEB_A5_A05_CD8 _2020-06-15,2431.208496,151.314285,600.015991,358.024139,157.152969,1178.356323,49.420422,963.637268,356.727325,239.107758,3162.109863,FALSE,-0.178128913968722,-4.01839216033291,"16"
export_AJP SEB_A5_A05_CD8 _2020-06-15,34.110729,16.140247,452.735382,184.148758,1053.208008,2455.694336,-50.580978,10210.788086,748.040894,284.84079,111.511734,FALSE,-23.4907819642564,-35.8665404748717,"24"
export_AJP SEB_A5_A05_CD8 _2020-06-15,8968.950195,129.187012,304.862701,2791.268066,2758.084229,63.208576,33.992321,282.028687,129.089874,984.359497,410.736145,FALSE,35.5414559093046,27.8511751238683,"23"
export_AJP SEB_A5_A05_CD8 _2020-06-15,108.140663,92.12146,1526.019165,112.224968,41.071609,1670.083374,-116.646408,13942.393555,883.410828,236.152908,1306.402466,FALSE,-20.4264501955092,-25.2780036809646,"2"
export_AJP SEB_A5_A05_CD8 _2020-06-15,440.730499,146.034698,301.318481,125.988365,1044.935669,924.333618,-39.763756,3341.789063,149.73291,332.235535,1051.761719,FALSE,-4.57662475657133,-28.3577639864944,"16"
export_AJP SEB_A5_A05_CD8 _2020-06-15,426.497467,205.296555,316.884521,408.892731,940.284973,1263.037476,121.303368,23449.742188,1445.0802,628.817261,320.549896,FALSE,-27.7751525097849,-25.9897055172692,"2"
export_AJP SEB_A5_A05_CD8 _2020-06-15,6301.980957,127.383713,637.416138,563.9646,1411.22998,362.946655,-255.750275,31.908663,307.281647,14467.911133,-189.128952,FALSE,30.9730572756243,20.5321906808822,"12"
export_AJP SEB_A5_A05_CD8 _2020-06-15,13835.283203,165.0616,1917.75061,2472.711182,2252.299561,4.257234,303.883484,1808.439575,2379.666992,3247.490479,53775.25,FALSE,0.620990474425986,51.8999997874971,"22"
export_AJP SEB_A5_A05_CD8 _2020-06-15,6190.961426,198.752686,1227.877686,546.248596,2318.205322,230.168991,-160.505402,2788.805176,183.376007,15127.585938,264.428223,FALSE,31.9359924107684,20.9404423645984,"12"
export_AJP SEB_A5_A05_CD8 _2020-06-15,86.857307,153.019974,314.382507,73.494667,102.551788,1280.775391,2.584725,-253.877396,724.157043,257.30127,2050.673096,FALSE,-8.42537820297016,-29.1566022012229,"16"
export_AJP SEB_A5_A05_CD8 _2020-06-15,302.819153,104.560417,288.742218,176.395538,1201.743896,1040.886108,-7.321975,10932.902344,1614.361938,476.458221,537.946106,FALSE,-10.8541524603541,-29.7274156456446,"2"
export_AJP SEB_A5_A05_CD8 _2020-06-15,-217.504089,152.724762,328.322083,90.046562,264.696136,1247.851563,18.456818,144.451965,-16.47113,612.3302,1188.671387,FALSE,-7.69156410935232,-29.5190833591453,"16"
export_AJP SEB_A5_A05_CD8 _2020-06-15,11657.541992,109.886436,218.087463,572.344299,1196.174438,2.409048,-80.789101,-452.751251,704.268738,248.721939,3.216699,FALSE,32.7318154279837,33.3862633971935,"23"
export_AJP SEB_A5_A05_CD8 _2020-06-15,612.483521,142.865936,2035.724243,179.601944,392.550293,860.814941,49.573128,1588.023804,1650.414795,179.152145,4756.129883,FALSE,-9.54132319564258,-15.9372858258044,"16"
export_AJP SEB_A5_A05_CD8 _2020-06-15,347.176849,92.641228,688.246826,658.300171,542.099365,108.002022,42.863033,266.984161,1319.150024,348.540466,289.878052,FALSE,8.37600202850942,-7.36726577243233,"9"
export_AJP SEB_A5_A05_CD8 _2020-06-15,510.479034,202.799896,326.640289,208.524689,581.536438,411.795288,-243.955429,160.333374,793.679993,15770.237305,-96.847015,FALSE,20.5069093485726,-34.8930799028859,"25"
export_AJP SEB_A5_A05_CD8 _2020-06-15,3723.128906,66.278145,1245.221802,177.921066,101.148125,946.808594,73.256088,1854.756104,312.909302,199.968567,774.759277,FALSE,13.8152696710843,12.732428634016,"15"
export_AJP SEB_A5_A05_CD8 _2020-06-15,-182.38121,148.343872,153.466232,137.517456,124.862389,497.834564,43.57412,2325.216797,2615.058838,79.602272,6501.631348,FALSE,-6.99201430522769,14.2470363349517,"7"
export_AJP SEB_A5_A05_CD8 _2020-06-15,809.546753,124.744789,423.544403,201.669907,234.600525,140.600159,6.975885,5383.831543,60.107311,1332.522217,283.794128,FALSE,-0.229250008041436,-8.92778930170928,"6"
export_AJP SEB_A5_A05_CD8 _2020-06-15,546.259277,132.143356,327.066162,534.611572,241.014908,75.416847,10.272619,1968.824951,569.842896,386.846008,151.572525,FALSE,7.99233882098815,-4.85577825120727,"9"
export_AJP SEB_A5_A05_CD8 _2020-06-15,-5.722164,207.219727,384.904388,76.146706,633.108765,580.754395,61.302864,858.994324,298.606659,455.099213,1423.846558,FALSE,0.329056369415041,-22.0190641066875,"16"
export_AJP SEB_A5_A05_CD8 _2020-06-15,30.410208,76.547935,94.879822,182.127274,976.991455,1765.698975,-47.046627,4695.861816,923.690063,188.101013,490.35553,FALSE,-14.1425079234826,-34.901146695586,"24"
export_AJP SEB_A5_A05_CD8 _2020-06-15,10481.682617,216.271133,1011.201294,1163.278809,1768.75647,394.751923,-542.874878,297.676819,3907.4729,16588.494141,168.783295,FALSE,30.8138055052711,28.8255520600253,"12"
export_AJP SEB_A5_A05_CD8 _2020-06-15,614.820496,112.375664,593.437378,165.25618,-25.904106,429.128815,194.249878,6710.383789,203.712021,433.497803,9283.739258,FALSE,-4.38011716209453,21.1947872515611,"14"
export_AJP SEB_A5_A05_CD8 _2020-06-15,50.207012,125.347725,350.837311,75.888878,191.627838,114.646713,51.59491,204.442657,369.85199,595.52655,844.881714,FALSE,3.61859214789616,-8.03045076702141,"9"
export_AJP SEB_A5_A05_CD8 _2020-06-15,11683.649414,128.547409,86.166512,473.141022,1993.779663,21.026941,-166.461487,-198.96907,974.624329,364.554932,26.070095,FALSE,33.3260197125315,32.8332065600209,"23"
export_AJP SEB_A5_A05_CD8 _2020-06-15,-275.774384,43.408871,330.432495,225.275391,964.34082,671.418274,34.629517,15048.044922,858.52533,33.703289,714.078552,FALSE,-17.9751863122682,-20.8624966388327,"2"
export_AJP SEB_A5_A05_CD8 _2020-06-15,188.739136,134.104691,2064.140625,184.837158,1368.875122,1019.148865,115.513214,5312.368652,681.038452,1073.298828,846.949097,FALSE,-6.23547749247729,-28.9461609669769,"24"
export_AJP SEB_A5_A05_CD8 _2020-06-15,264.88205,58.476479,362.66391,97.787376,1373.662231,892.872314,9.668715,9107.387695,152.048965,-121.353889,2309.462402,TRUE,-19.396981225603,-25.7480605960045,"13"
export_AJP SEB_A5_A05_CD8 _2020-06-15,745.554016,133.278763,3213.597168,687.419128,653.750427,1688.287598,-84.641708,5677.999512,3247.126465,628.422058,826.142212,FALSE,-13.2907397766761,-27.5707547262269,"24"
export_AJP SEB_A5_A05_CD8 _2020-06-15,331.278351,197.078583,1075.575439,463.58493,796.79248,38.975708,29.212769,2057.499023,564.063538,260.77948,315.785675,FALSE,7.46326158717229,-7.91482970960297,"6"
export_AJP SEB_A5_A05_CD8 _2020-06-15,983.775269,159.327652,815.980469,185.7659,-119.703781,1419.440796,262.547821,2808.302002,5547.573242,664.525696,10712.736328,FALSE,-33.6644307810212,-0.289635148456044,"7"
export_AJP SEB_A5_A05_CD8 _2020-06-15,98.367149,104.093384,573.272888,399.877289,698.279602,1001.091431,24.788591,12688.72168,1183.314331,227.608841,404.629608,FALSE,-14.6578161858032,-24.3323685490684,"2"
export_AJP SEB_A5_A05_CD8 _2020-06-15,-23.585758,104.378204,267.858582,224.45639,771.327881,1016.519897,-15.927505,20947.552734,71.484802,653.771179,1310.498535,FALSE,-26.111571205376,-25.3521130831634,"2"
export_AJP SEB_A5_A05_CD8 _2020-06-15,237.114487,40.880119,452.772705,314.234802,702.367371,1115.915161,75.747429,1756.677124,1096.607788,1165.910889,157.255768,FALSE,-5.35435429580646,-30.5334670058294,"16"
export_AJP SEB_A5_A05_CD8 _2020-06-15,64.709221,64.314651,422.84317,140.771729,963.855469,1863.386719,-24.853172,13863.588867,787.104309,471.713928,407.361816,FALSE,-21.9193353776701,-32.4602214888713,"2"
export_AJP SEB_A5_A05_CD8 _2020-06-15,11254.823242,107.130348,295.593079,1516.157349,1532.073486,53.425079,-0.731457,118.904373,174.190521,1169.745972,103.935272,FALSE,31.9076382706053,32.457657956747,"23"
export_AJP SEB_A5_A05_CD8 _2020-06-15,8489.012695,173.214966,369.420654,1190.822998,1497.14563,60.412186,5.657384,368.420532,214.511719,1809.026489,446.429016,FALSE,32.575490259085,27.7045846525553,"23"
export_AJP SEB_A5_A05_CD8 _2020-06-15,3573.959473,201.352753,769.190918,780.660095,1064.455566,291.750061,105.407028,222.530884,1177.171387,3403.752197,595.390442,TRUE,24.6333767650595,10.8195359663979,"18"
export_AJP SEB_A5_A05_CD8 _2020-06-15,8390.079102,17.817295,120.976753,1360.156738,1853.982544,245.168762,118.713966,319.975098,1331.999146,40.328228,157.147873,FALSE,34.2438889238211,27.6722141166842,"23"
export_AJP SEB_A5_A05_CD8 _2020-06-15,1112.146729,72.360718,403.924316,193.207443,112.867073,720.317261,30.565182,2278.554932,1704.142578,1783.21814,10386.753906,FALSE,-5.38561770588344,27.5480146580957,"14"
export_AJP SEB_A5_A05_CD8 _2020-06-15,345.45639,164.361298,287.652496,198.372009,453.405365,319.668182,-41.520889,3747.296631,119.950508,1068.863892,-70.622795,FALSE,-0.382272330316638,-17.681361585485,"25"
export_AJP SEB_A5_A05_CD8 _2020-06-15,1507.878174,149.617661,868.498962,391.767151,1781.827515,267.343475,80.329018,3292.512939,445.657318,1052.792725,353.767059,FALSE,17.1587989561165,-4.17450733437129,"11"
export_AJP SEB_A5_A05_CD8 _2020-06-15,825.011536,104.020355,283.553864,880.799011,1406.553955,104.421829,-4.008865,1488.017578,589.557983,348.412018,150.317169,FALSE,19.2943090963978,-5.54412454698364,"11"
export_AJP SEB_A5_A05_CD8 _2020-06-15,3869.118408,127.386719,587.648132,580.513306,1194.333862,1034.493164,31.60059,12318.385742,4236.327637,719.941711,3540.764648,FALSE,5.55648034866537,17.2247518563578,"2"
export_AJP SEB_A5_A05_CD8 _2020-06-15,273.274689,69.977425,209.242874,1.122927,185.08139,142.464066,40.870628,2236.292725,1667.729736,-21.566143,130.939178,FALSE,1.44076254102002,-6.23431468530128,"9"
export_AJP SEB_A5_A05_CD8 _2020-06-15,434.942719,104.784981,606.119507,124.195549,672.914368,1348.828125,-50.833134,15199.845703,319.914185,1026.240723,150.826218,FALSE,-20.0623761282043,-26.9188322076707,"2"
export_AJP SEB_A5_A05_CD8 _2020-06-15,340.068542,112.909187,329.909332,92.195702,497.762726,626.893433,72.301315,267.130768,72.975632,433.624756,5049.65918,FALSE,-3.79614736898053,-7.36149837663883,"14"
export_AJP SEB_A5_A05_CD8 _2020-06-15,76.610443,68.382202,229.320053,102.753899,253.116409,950.891968,54.482635,59.509724,205.012115,266.391174,764.355225,FALSE,-4.29125058931097,-26.8288687786209,"16"
export_AJP SEB_A5_A05_CD8 _2020-06-15,-91.173004,69.653046,468.636322,158.0961,807.642883,419.554047,0.004531,245.841293,312.887115,1549.896362,486.824768,FALSE,4.46293488198282,-21.2714838547491,"11"
export_AJP SEB_A5_A05_CD8 _2020-06-15,-259.036621,137.737244,321.649689,144.069031,171.479034,-170.080231,-169.672516,723.800293,2840.636719,587.686401,38854.699219,FALSE,-9.37541951339577,54.2194148751463,"22"
export_AJP SEB_A5_A05_CD8 _2020-06-15,243.215897,132.242172,1804.017334,421.26947,695.727905,-28.685547,-10.56777,312.034058,635.802124,1357.365967,56545.621094,FALSE,-10.40788351325,55.1276808723791,"22"
export_AJP SEB_A5_A05_CD8 _2020-06-15,803.006714,129.306976,276.572693,93.906563,233.509354,473.636108,-24.552427,5665.6875,1073.570435,332.411072,250.324753,FALSE,-5.56849787632804,-15.8745111489166,"16"
export_AJP SEB_A5_A05_CD8 _2020-06-15,453.691437,138.097458,-516.978943,134.672043,529.611938,103.47139,137.689957,-2114.401367,14597.813477,445.582703,160.349075,FALSE,-34.0856939234452,20.2031316884246,"19"
export_AJP SEB_A5_A05_CD8 _2020-06-15,5268.923828,65.484413,1636.963135,375.263824,2221.443604,227.147903,-87.59185,2025.058716,551.275452,2757.028809,305.475647,FALSE,30.7404398064842,20.2055987002926,"23"
export_AJP SEB_A5_A05_CD8 _2020-06-15,9252.407227,75.210983,215.951721,1748.508057,1651.819214,-43.07687,-17.962696,446.564301,35.495689,887.215088,121.96032,FALSE,34.1172628418139,29.5450095424639,"23"
export_AJP SEB_A5_A05_CD8 _2020-06-15,522.587402,100.416267,688.006836,203.431976,260.629303,1524.956665,9.056119,830.123047,206.723831,2925.733398,-88.681366,FALSE,-9.39741600778011,-32.3887304875907,"24"
export_AJP SEB_A5_A05_CD8 _2020-06-15,7686.354492,96.646461,302.342987,224.237335,-89.094948,11.566159,-70.560081,11672.701172,492.530609,1007.905273,52.051113,FALSE,21.1507311928116,26.0806306058372,"5"
export_AJP SEB_A5_A05_CD8 _2020-06-15,5469.393066,194.497787,335.68277,169.122772,164.207733,1163.417114,14.075219,1060.697632,81.037819,186.79541,1756.409424,FALSE,18.1775924660554,16.0939224166501,"15"
export_AJP SEB_A5_A05_CD8 _2020-06-15,266.625702,5.187821,610.85614,196.884827,28.844257,690.527283,262.403839,431.65979,689.769592,309.338348,1878.151978,FALSE,-3.61490282244144,-16.0410037583226,"16"
export_AJP SEB_A5_A05_CD8 _2020-06-15,554.774048,97.292725,277.641052,139.585709,641.612366,63.653076,408.77475,958.338562,724.209534,54.410862,232.249557,FALSE,4.53152631227104,-4.88670010636401,"9"
export_AJP SEB_A5_A05_CD8 _2020-06-15,1697.225342,117.325172,320.996521,174.662659,-158.018509,64.204407,-3.127177,11895.198242,157.601212,907.137695,669.660828,FALSE,-7.20903852628911,-0.777793600750375,"15"
export_AJP SEB_A5_A05_CD8 _2020-06-15,2409.558838,35.391102,169.44635,131.817474,708.269714,291.378784,27.824873,10151.225586,801.326233,-162.887085,224.762802,FALSE,10.1901778625235,9.36391881120625,"15"
export_AJP SEB_A5_A05_CD8 _2020-06-15,17571.732422,205.463287,895.562012,469.19928,936.676819,214.399933,-125.184921,416.47226,449.903656,6894.182617,476.465332,FALSE,30.9876509265622,33.5417949112575,"5"
export_AJP SEB_A5_A05_CD8 _2020-06-15,112.066368,237.251022,515.562988,238.362869,610.62323,822.962585,-90.779961,28131.054688,498.926941,1237.759277,44.615383,FALSE,-29.6024585200612,-22.9691370428198,"3"
export_AJP SEB_A5_A05_CD8 _2020-06-15,489.025818,148.843002,395.03833,219.193375,-147.285172,117.467003,-29.536179,611.442749,64.360191,1064.635864,678.614258,FALSE,4.30075909906254,-6.03100644559137,"9"
export_AJP SEB_A5_A05_CD8 _2020-06-15,171.022903,252.717743,777.290466,429.861969,987.463989,619.668945,38.267414,1900.205688,625.212097,645.47699,564.152405,FALSE,0.966424540733642,-24.3680935795618,"11"
export_AJP SEB_A5_A05_CD8 _2020-06-15,829.484863,203.303055,437.431,311.798645,129.100601,749.319641,107.82222,2684.628418,30.201708,737.423645,16833.818359,FALSE,-5.48486373648472,38.7075489149249,"14"
export_AJP SEB_A5_A05_CD8 _2020-06-15,1247.692139,143.53804,211.325256,158.522263,193.216873,631.499756,-96.107796,-35.759754,1049.605713,328.370972,199.421539,FALSE,2.7789544804672,-6.61070465163962,"16"
export_AJP SEB_A5_A05_CD8 _2020-06-15,193.404861,38.43224,838.597595,959.948303,2288.996338,960.648743,-16.274569,10328.708008,2586.343262,584.591553,780.081421,FALSE,-4.62464970185711,-34.7960881361397,"2"
export_AJP SEB_A5_A05_CD8 _2020-06-15,187.961075,106.173607,586.909119,267.361969,1809.174683,1227.483521,70.392715,11247.365234,476.01532,1417.699951,546.764954,FALSE,-10.2795638452724,-35.3191220777884,"2"
export_AJP SEB_A5_A05_CD8 _2020-06-15,1408.834839,99.497849,247.601227,121.43309,93.317238,81.198631,127.088089,3980.001709,-7.186871,1090.212402,-75.761101,FALSE,8.2097225655731,1.68599914187667,"9"
export_AJP SEB_A5_A05_CD8 _2020-06-15,764.921021,121.351089,339.080902,636.513428,928.27179,91.036438,105.27697,1977.288452,713.12616,653.25708,232.491669,FALSE,11.8843109188414,-4.6894308764357,"11"
export_AJP SEB_A5_A05_CD8 _2020-06-15,150.367081,92.43544,176.74028,113.835457,415.021637,1171.710327,13.540769,3499.873535,266.535919,463.463135,1204.988647,FALSE,-7.93371162487741,-29.3878588048247,"16"
export_AJP SEB_A5_A05_CD8 _2020-06-15,-79.469917,27.979172,224.635147,579.221436,884.722107,62.667255,46.827042,1353.840576,666.477661,258.205383,352.92627,FALSE,9.16961005322553,-12.9066370774156,"11"
export_AJP SEB_A5_A05_CD8 _2020-06-15,311.072937,172.024872,293.149658,104.18763,28.913631,424.807373,31.38176,12405.198242,5.251459,995.729492,-35.100582,FALSE,-13.3745530336414,-13.8291640671395,"6"
export_AJP SEB_A5_A05_CD8 _2020-06-15,124.2556,69.292282,225.915314,143.035751,441.243256,611.724792,44.703812,-40.142567,51.88171,407.631226,738.566406,FALSE,-0.0160464458187183,-22.2055747596508,"16"
export_AJP SEB_A5_A05_CD8 _2020-06-15,302.628815,30.350056,-1138.194336,327.407166,463.842529,1614.875977,-425.184326,3651.737549,31583.332031,188.198532,3711.259033,FALSE,-40.4847494550639,30.6788882655336,"7"
export_AJP SEB_A5_A05_CD8 _2020-06-15,754.776978,142.693787,740.246521,47.346912,177.817642,1032.973145,103.652809,2767.291016,94.271774,206.348831,3768.12085,FALSE,-10.55960413243,-23.4728362044427,"16"
export_AJP SEB_A5_A05_CD8 _2020-06-15,56.191204,140.319229,1043.035767,1220.336548,3863.62793,1215.02771,-33.638706,14217.262695,494.172241,7706.86377,317.927887,FALSE,0.785086115359534,-44.1414014277348,"25"
export_AJP SEB_A5_A05_CD8 _2020-06-15,-11.217963,172.805344,393.162903,278.091736,692.094055,723.32843,-44.434593,3266.422607,834.728882,3368.701904,525.49353,FALSE,1.21085807425099,-28.1541796997174,"25"
export_AJP SEB_A5_A05_CD8 _2020-06-15,-44.707054,121.502998,394.064301,287.195099,379.336609,1221.228638,29.786024,856.89325,392.788422,8164.703613,96.97364,FALSE,-0.60507005273449,-35.4712681901581,"25"
export_AJP SEB_A5_A05_CD8 _2020-06-15,708.087158,110.91539,1044.004761,192.642044,81.443214,3030.197998,133.741699,2453.670898,-47.072296,418.780273,1984.564331,FALSE,-22.7633990877674,-34.1492482511174,"24"
export_AJP SEB_A5_A05_CD8 _2020-06-15,366.971252,142.582367,898.155823,784.913818,1012.60553,1351.828857,85.3564,19969.222656,272.314484,731.976624,2275.621094,FALSE,-24.7432295093989,-27.6213150192254,"2"
export_AJP SEB_A5_A05_CD8 _2020-06-15,-1098.479492,179.625076,603.099304,296.422577,538.399231,553.715454,-23.60268,674.281738,78.988884,11602.466797,48712.949219,FALSE,-7.85733869405543,56.1761276637072,"22"
export_AJP SEB_A5_A05_CD8 _2020-06-15,77.644447,63.155155,1256.859375,337.882599,374.511993,2898.044678,-430.881561,9600.130859,13072.587891,381.743591,17081.267578,FALSE,-45.266740975746,-2.62074813933959,"7"
export_AJP SEB_A5_A05_CD8 _2020-06-15,87.261452,122.7724,343.825714,143.00499,135.583069,152.284103,124.806969,1592.926392,681.80426,208.462387,144.057983,FALSE,1.21296225900878,-8.74000466345684,"9"
export_AJP SEB_A5_A05_CD8 _2020-06-15,652.661865,133.699234,458.57019,1164.188721,3727.572754,95.046951,352.386597,8929.594727,693.941345,309.224182,71.218941,FALSE,24.5657226829707,-9.97241606934418,"28"
export_AJP SEB_A5_A05_CD8 _2020-06-15,851.112183,131.536636,1208.832275,58.660919,268.719147,635.099182,42.412655,1627.248535,236.746277,789.585327,20337.097656,FALSE,-6.46101023089952,44.7692266994313,"22"
export_AJP SEB_A5_A05_CD8 _2020-06-15,-94.81501,74.934807,355.056763,168.092361,20.393343,157.385727,99.464027,2103.680176,1626.2323,160.168137,311.721039,FALSE,0.37885584743477,-8.14336653774195,"9"
export_AJP SEB_A5_A05_CD8 _2020-06-15,1591.002075,-1.144697,74.585281,177.035294,-57.374161,37.548157,-123.906898,4162.999023,5275.814941,383.577759,426.077515,FALSE,-13.3167649429023,6.55597997748201,"6"
export_AJP SEB_A5_A05_CD8 _2020-06-15,304.293854,53.451771,686.76886,251.640747,1087.395264,1928.411011,89.854973,2898.324219,431.952423,322.768036,1064.941284,FALSE,-16.3757083982645,-35.3765648608285,"24"
export_AJP SEB_A5_A05_CD8 _2020-06-15,943.69397,139.819901,2395.455811,288.504974,400.208832,680.868713,8.216552,5635.539551,1555.006958,3588.393555,455.357483,FALSE,-2.67860914977375,-18.4456203621862,"6"
export_AJP SEB_A5_A05_CD8 _2020-06-15,271.197754,47.605717,170.260941,110.941315,130.894241,944.01709,59.646961,261.911102,7.296781,327.45166,716.470825,FALSE,-4.72689287266,-25.904449873504,"16"
export_AJP SEB_A5_A05_CD8 _2020-06-15,544.088989,124.067543,503.95047,636.453186,1509.304199,2392.710449,-0.897533,14292.802734,1213.978027,473.766235,-81.244858,FALSE,-24.2425752095735,-36.9593676060428,"24"
export_AJP SEB_A5_A05_CD8 _2020-06-15,545.641541,202.241333,1097.429932,261.332031,463.072876,1657.911377,-81.391953,7874.185547,2725.035889,415.197784,66.116898,FALSE,-13.192617715163,-29.4750962307179,"2"
export_AJP SEB_A5_A05_CD8 _2020-06-15,1936.872803,14.303222,684.405579,278.61731,1198.639404,214.104034,553.121338,1559.644775,303.36496,902.32959,504.086914,FALSE,8.91173940241,2.34837405548629,"9"
export_AJP SEB_A5_A05_CD8 _2020-06-15,334.95462,92.203529,383.147003,171.049576,310.73114,197.795135,89.794998,187.360962,48.401176,344.659302,754.61322,FALSE,3.87384579615988,-7.73436445765477,"9"
export_AJP SEB_A5_A05_CD8 _2020-06-15,852.260742,111.235214,326.648102,493.602203,93.053833,1525.396606,169.270554,10049.28125,6983.674805,-116.139297,1904.336182,FALSE,-37.1410902731028,-2.25120003306867,"2"
export_AJP SEB_A5_A05_CD8 _2020-06-15,7639.116211,278.672699,835.816772,1358.270752,2075.125977,49.265285,-24.82959,1212.701782,421.577454,3104.609375,822.139832,FALSE,33.8820308849927,26.0972564188745,"23"
export_AJP SEB_A5_A05_CD8 _2020-06-15,1156.366821,213.083557,2724.362793,345.524414,455.494537,343.932098,44.400734,370.545807,1008.581055,413.374359,422.421143,FALSE,6.10208672338441,-1.78183388142695,"6"
export_AJP SEB_A5_A05_CD8 _2020-06-15,463.183929,64.915215,292.730774,259.725769,484.040405,293.414001,37.472305,7458.638672,614.910522,450.615967,94.192772,TRUE,-12.7105504376072,-14.70386618734,"11"
export_AJP SEB_A5_A05_CD8 _2020-06-15,173.290573,-20.888725,190.841064,83.980957,197.737976,367.453888,5.321373,95.592697,62.571564,240.923691,799.6651,FALSE,1.53387168221465,-14.4155986759504,"16"
export_AJP SEB_A5_A05_CD8 _2020-06-15,-473.649658,83.66925,593.753113,266.521698,318.159576,1371.104126,52.83622,13620.294922,63.422546,677.889526,2235.238525,FALSE,-18.3785670743974,-28.2637488710404,"2"
export_AJP SEB_A5_A05_CD8 _2020-06-15,1225.404053,55.452763,350.846405,200.512665,115.087379,1786.877319,23.089836,2877.787109,192.424988,498.700378,6422.733398,FALSE,-17.8792334769176,-26.7981510965253,"24"
export_AJP SEB_A5_A05_CD8 _2020-06-15,277.881653,67.328529,382.354065,337.949768,715.470093,155.737793,176.619125,6593.432129,1291.725098,351.583771,181.85022,FALSE,-3.27724731191368,-10.4704862935692,"11"
export_AJP SEB_A5_A05_CD8 _2020-06-15,1557.510376,41.528854,371.031372,199.188263,167.191223,1162.782471,2.001286,2384.383789,135.419617,537.08606,19449.601563,FALSE,-11.1750964487475,35.4063698419375,"14"
export_AJP SEB_A5_A05_CD8 _2020-06-15,1437.452026,99.356636,1210.360718,372.488068,743.106812,2897.859619,652.5224,5728.024414,1905.420288,706.599426,12962.224609,FALSE,-32.221437249033,-23.2060274100263,"7"
export_AJP SEB_A5_A05_CD8 _2020-06-15,570.934937,88.146065,295.747192,138.832947,138.854996,585.072266,-37.922668,-150.97641,204.503586,760.455017,714.445984,TRUE,-1.90542288913653,-25.3754107257193,"16"
export_AJP SEB_A5_A05_CD8 _2020-06-15,-4.066211,70.521309,557.539551,75.037262,248.440491,250.742828,22.412956,4672.70459,86.768433,406.725189,1156.181519,FALSE,-3.0169323092202,-13.3382108910442,"6"
export_AJP SEB_A5_A05_CD8 _2020-06-15,1150.978882,92.88163,452.370972,144.4814,150.462891,194.263367,36.429771,4769.406738,72.098907,403.730316,10668.603516,TRUE,-2.70858249353726,28.1913742880898,"14"
export_AJP SEB_A5_A05_CD8 _2020-06-15,362.180298,126.601631,1166.520508,190.178757,47.472191,295.589111,72.08815,3135.029053,60.539772,1766.399658,3231.438477,FALSE,-1.77104528379729,-7.34480119272882,"6"
export_AJP SEB_A5_A05_CD8 _2020-06-15,97.378853,127.850914,389.699158,170.007385,123.206261,465.249023,10.172708,-47.54884,129.384293,780.682495,816.692322,FALSE,0.426101478326121,-18.6586363505909,"16"
export_AJP SEB_A5_A05_CD8 _2020-06-15,2063.647461,130.910156,307.825165,730.063354,1081.826782,175.278717,43.674034,399.937195,50.376217,-201.318237,1017.909668,FALSE,21.5535524645661,6.34554557496471,"11"
export_AJP SEB_A5_A05_CD8 _2020-06-15,-242.419434,201.321014,480.095703,872.167542,33.461048,4242.525879,318.514984,17620.84375,4433.000977,865.956604,477.450073,FALSE,-25.2408289237706,-39.2382330967139,"24"
export_AJP SEB_A5_A05_CD8 _2020-06-15,158.897156,205.068451,337.266815,295.49585,-161.900162,2031.424683,100.093895,16464.912109,-23.940863,1026.99585,161.918716,FALSE,-23.4259114620588,-31.3815598699625,"2"
export_AJP SEB_A5_A05_CD8 _2020-06-15,2495.47168,200.227676,241.126648,204.841507,408.622162,189.202469,284.336334,6820.886719,5187,113.665703,435.5383,FALSE,-16.1069141537539,9.75330136936072,"4"
export_AJP SEB_A5_A05_CD8 _2020-06-15,-178.764145,89.283684,630.159058,487.005402,550.982971,285.782959,150.589188,7472.79541,649.700562,78.119995,265.486145,FALSE,-5.52896258897803,-14.7708641106173,"11"
export_AJP SEB_A5_A05_CD8 _2020-06-15,7042.993164,186.459747,365.988586,237.164749,2340.533203,307.612152,51.896774,347.052002,263.935455,1103.473633,158.661652,FALSE,34.6372772912231,25.81196857222,"23"
export_AJP SEB_A5_A05_CD8 _2020-06-15,350.072174,140.595474,503.628693,210.646362,1091.396606,223.215149,17.94031,4959.307617,60.557919,1252.442993,161.758133,FALSE,3.16354021374099,-19.2174085963353,"11"
export_AJP SEB_A5_A05_CD8 _2020-06-15,11034.625,195.568985,798.432678,1835.082153,4673.950195,614.21228,-102.363342,-246.884323,901.622253,2949.878418,211.541916,FALSE,32.4864633456852,29.5089437870633,"23"
export_AJP SEB_A5_A05_CD8 _2020-06-15,587.747925,96.180687,294.034027,148.104752,1929.958984,163.19162,112.539833,2429.062012,143.457779,-5.765226,741.652954,FALSE,15.474284872459,-14.3534393171252,"11"
export_AJP SEB_A5_A05_CD8 _2020-06-15,1822.030396,122.268997,343.555573,276.800476,779.361511,-85.734665,-7.023519,3459.523193,325.024414,549.758057,23697.917969,FALSE,-8.08332789607032,47.314305375053,"22"
export_AJP SEB_A5_A05_CD8 _2020-06-15,1055.312622,135.129929,580.782898,31.898224,1431.599731,172.293991,-145.100845,4709.458984,1519.387817,17149.398438,196.611526,FALSE,22.9777465586733,-36.5357264432964,"25"
export_AJP SEB_A5_A05_CD8 _2020-06-15,61.074554,103.135406,173.359604,282.60199,204.873444,1555.92688,-0.057598,5599.401367,1420.75061,59.261761,299.940613,FALSE,-11.671357614054,-31.2499526909321,"24"
export_AJP SEB_A5_A05_CD8 _2020-06-15,19462.785156,134.2565,328.583893,2119.953613,2233.212158,-87.525803,-52.56411,-389.173981,198.060196,990.719055,521.96228,FALSE,31.2165042338773,33.9705544868202,"5"
export_AJP SEB_A5_A05_CD8 _2020-06-15,-276.499481,-20.940102,279.454651,129.085556,434.23642,111.978706,15.740468,398.20517,1447.511108,-61.268749,586.213379,FALSE,4.52605378687877,-7.65222033128834,"11"
export_AJP SEB_A5_A05_CD8 _2020-06-15,691.958923,281.200134,1440.781006,214.542618,692.024597,858.670654,95.923874,7507.674805,162.796432,1368.387939,4674.793945,FALSE,-11.7817207459488,-22.7159801631942,"16"
export_AJP SEB_A5_A05_CD8 _2020-06-15,1033.835815,76.604706,282.274994,198.808594,131.909912,547.898254,80.429276,4413.376465,71.22438,732.935059,14495.786133,FALSE,-4.75392258823975,35.9062900913405,"14"
export_AJP SEB_A5_A05_CD8 _2020-06-15,8960.118164,194.814346,501.387024,1059.221436,1292.9104,19.792978,3.49871,123.822639,121.117424,1891.696533,736.562805,FALSE,31.5351510783391,28.7248137875733,"23"
export_AJP SEB_A5_A05_CD8 _2020-06-15,13809.370117,120.336807,471.086945,143.393295,-11.682573,925.740479,30.365871,12758.94043,92.305687,1167.965698,166.651871,FALSE,25.2321810413481,32.8500073882999,"5"
export_AJP SEB_A5_A05_CD8 _2020-06-15,-195.744827,27.695713,272.82074,55.679962,259.232422,185.625397,2.962476,-68.369003,91.004158,307.761749,1084.347046,FALSE,3.54740049773832,-8.9741550648459,"9"
export_AJP SEB_A5_A05_CD8 _2020-06-15,535.381409,30.637405,381.834534,104.650627,777.369751,511.094879,-6.368219,8463.195313,1053.807129,181.211853,89.42234,FALSE,-7.58670553323388,-19.013148650843,"16"
export_AJP SEB_A5_A05_CD8 _2020-06-15,134.131348,15.612358,147.113052,155.657028,198.927216,812.273438,-35.878937,5135.587402,2090.758057,179.874619,616.326477,TRUE,-14.1271981133841,-23.6455453015884,"16"
export_AJP SEB_A5_A05_CD8 _2020-06-15,948.975037,162.775253,993.968689,465.477142,358.156555,107.113251,205.851364,3369.335205,1482.195435,842.867981,8380.658203,FALSE,-0.301036418565544,27.2086048594947,"21"
export_AJP SEB_A5_A05_CD8 _2020-06-15,-10.764454,60.011765,1167.296753,629.259277,338.600922,2195.908203,346.545593,5783.132813,12183.079102,467.688812,585.913757,FALSE,-43.0390709197994,3.17662562706002,"7"
export_AJP SEB_A5_A05_CD8 _2020-06-15,284.183777,180.453934,821.562195,593.4198,1566.864746,744.575378,34.892078,21305.148438,712.884521,455.554199,499.258453,FALSE,-26.5186682660258,-21.8505101009258,"2"
export_AJP SEB_A5_A05_CD8 _2020-06-15,866.098938,25.958845,1901.187622,416.315063,1165.25769,1341.74585,328.864166,25405.392578,635.728516,578.518982,16304.018555,FALSE,-34.4910224861262,-20.4395912247742,"1"
export_AJP SEB_A5_A05_CD8 _2020-06-15,261.554871,52.338844,247.90625,50.557781,268.680084,698.352661,5.172454,244.236038,113.228615,513.21875,700.324951,FALSE,-1.95337110522428,-22.1603253882604,"16"
export_AJP SEB_A5_A05_CD8 _2020-06-15,-167.033661,76.73455,1293.890381,209.070999,1479.626953,1388.328369,14.763144,11520.376953,1411.783447,60.01656,367.797668,FALSE,-15.1559908314403,-31.0658189416456,"2"
export_AJP SEB_A5_A05_CD8 _2020-06-15,3249.739746,60.174038,881.792358,338.057251,394.338959,-360.625946,62.13475,-450.8396,1310.213379,1073.679565,59986.40625,FALSE,-11.8081969375448,57.0247086784236,"22"
export_AJP SEB_A5_A05_CD8 _2020-06-15,-65.874344,68.367615,351.846893,183.504242,117.342773,1530.913452,-3.589445,91.237724,148.673264,310.665405,754.325134,FALSE,-10.740311983485,-30.7253798965724,"24"
export_AJP SEB_A5_A05_CD8 _2020-06-15,190.128174,213.685608,507.533356,157.437943,436.647247,929.575317,113.778976,592.696899,66.294975,1665.228027,160.819275,FALSE,-2.92313994117832,-27.7376359094926,"16"
export_AJP SEB_A5_A05_CD8 _2020-06-15,518.137817,109.435936,7.514859,95.335312,1278.822876,68.325668,-138.419586,10360.048828,4620.497559,71.602341,217.249573,FALSE,-17.7078092303383,-4.03187045564546,"7"
export_AJP SEB_A5_A05_CD8 _2020-06-15,349.229218,152.309906,410.635651,305.353668,402.246094,113.798607,61.185776,876.075867,1130.759521,169.310104,93.786697,FALSE,6.04585711063247,-7.25907601550612,"9"
export_AJP SEB_A5_A05_CD8 _2020-06-15,2.374917,102.998451,1117.975098,238.72113,1234.627563,1854.537964,-1.991177,2778.03833,526.493103,238.922287,1007.792786,FALSE,-15.4128273696301,-34.9623642332716,"24"
export_AJP SEB_A5_A05_CD8 _2020-06-15,554.588501,174.910828,2804.286621,308.015106,2799.504883,692.578003,-3.12949,1948.377319,1114.980103,410.722168,455.028015,FALSE,2.77567776474502,-23.7508038779466,"6"
export_AJP SEB_A5_A05_CD8 _2020-06-15,83.955688,116.345642,1038.235352,190.651749,2000.896118,579.291626,179.41391,3278.340332,1568.041992,999.322327,3772.680908,FALSE,0.275260387026456,-20.1719395882171,"11"
export_AJP SEB_A5_A05_CD8 _2020-06-15,1296.859375,98.269569,468.454071,41.223068,1669.564087,4.804954,-299.511688,447.772217,962.521729,15465.068359,19979.478516,FALSE,-3.20349039002468,44.524301871383,"10"
export_AJP SEB_A5_A05_CD8 _2020-06-15,123.523743,173.893539,380.468506,139.445709,230.455597,298.184174,39.562424,28.66987,140.115128,190.538132,732.694763,FALSE,1.9020342786865,-12.6108135506123,"9"
export_AJP SEB_A5_A05_CD8 _2020-06-15,951.606384,170.841873,330.591492,155.437378,525.771484,-68.134453,11.992831,1394.698608,376.576782,1001.875244,35401.1875,FALSE,-9.3918519526279,54.0849155726848,"22"
export_AJP SEB_A5_A05_CD8 _2020-06-15,1186.996216,160.064789,696.332886,319.522919,7.51076,1203.121094,155.00061,9144.356445,52.356255,240.108032,958.67804,FALSE,-12.9996533494175,-24.244598747619,"15"
export_AJP SEB_A5_A05_CD8 _2020-06-15,262.674744,80.311325,3974.756836,475.95752,-18.322927,1529.306152,6.770963,24724.769531,643.345154,574.964661,444.303589,FALSE,-28.9308850233861,-23.2764416089577,"24"
export_AJP SEB_A5_A05_CD8 _2020-06-15,958.195313,79.351776,406.759796,215.661057,1185.927002,250.035553,7.191042,20715.472656,626.615051,3.084808,274.93045,FALSE,-23.7546561357482,-16.5993851920448,"2"
export_AJP SEB_A5_A05_CD8 _2020-06-15,1288.815308,164.904938,1699.817627,127.449776,1051.349121,2556.422607,-169.857025,12093.732422,1285.046265,11601.802734,-21.864697,FALSE,-18.5685951602839,-40.0951987313935,"25"
export_AJP SEB_A5_A05_CD8 _2020-06-15,746.447449,227.822784,645.297485,293.402161,727.207886,1112.588989,-352.512512,4618.094727,309.721283,25909.015625,-5.325372,FALSE,24.4765970760101,-38.3403731576244,"25"
export_AJP SEB_A5_A05_CD8 _2020-06-15,1624.490479,190.586777,922.833496,298.322174,1797.902466,1135.205566,21.937862,-84.064667,309.130432,1426.395264,195.911636,TRUE,-13.7278388211979,-36.5220522425458,"13"
export_AJP SEB_A5_A05_CD8 _2020-06-15,2796.636963,106.858482,218.657013,251.315704,120.332802,361.113312,-51.263851,523.680359,988.716431,413.807343,273.514435,FALSE,15.717132371247,9.34141849577111,"15"
export_AJP SEB_A5_A05_CD8 _2020-06-15,3065.599365,72.691635,290.266815,925.275146,1702.816406,225.490967,50.297672,-248.753448,969.844482,507.920471,299.479645,FALSE,27.8928826520348,9.73879574713775,"18"
export_AJP SEB_A5_A05_CD8 _2020-06-15,1040.108398,163.782867,944.363098,513.255615,608.803162,1051.199341,11.695055,3728.166748,129.686111,1532.579468,5491.320313,FALSE,-11.1695489721608,-22.966417183075,"16"
export_AJP SEB_A5_A05_CD8 _2020-06-15,1178.016113,40.709545,-119.152504,76.498466,21.363466,2111.805664,39.976093,5971.455078,16539.976563,30.758226,9923.505859,FALSE,-50.0195925348314,3.72364583508348,"7"
export_AJP SEB_A5_A05_CD8 _2020-06-15,-92.416893,265.410309,4212.723145,2908.066406,805.617371,625.267212,-128.322601,4226.139648,2357.43457,925.003723,4257.952637,FALSE,0.973462702253787,-3.56391556609533,"6"
export_AJP SEB_A5_A05_CD8 _2020-06-15,14040.540039,147.381042,570.292236,468.932434,2873.944092,200.528076,-34.374508,471.259308,717.02179,266.314148,298.96701,FALSE,32.642600968218,33.1083678581726,"23"
export_AJP SEB_A5_A05_CD8 _2020-06-15,46.692287,88.891762,3806.831787,694.650024,1496.874756,1283.627808,144.986984,7988.930176,541.189148,1213.700317,713.149902,FALSE,-12.1636812638294,-29.963205172114,"24"
export_AJP SEB_A5_A05_CD8 _2020-06-15,462.778687,79.488945,711.060364,145.457367,140.323318,292.759827,12.804774,2412.881836,149.661682,1961.634521,226.058823,FALSE,0.404270525371627,-16.035989057861,"25"
export_AJP SEB_A5_A05_CD8 _2020-06-15,3774.313721,134.092072,216.192749,814.203064,1146.257446,120.93409,20.915396,5.111229,657.921692,51.879761,339.860016,FALSE,27.1787755017412,13.3801985083484,"18"
export_AJP SEB_A5_A05_CD8 _2020-06-15,328.433563,223.523926,286.835083,309.51178,-134.284241,516.251648,52.809254,2942.886475,1473.460205,482.171967,244.981567,FALSE,-2.73906644889671,-16.6677405804298,"16"
export_AJP SEB_A5_A05_CD8 _2020-06-15,228.973099,77.803078,432.547791,192.217773,220.167999,1493.165039,15.477373,360.270966,60.983784,1205.220947,369.042175,FALSE,-10.0948396735947,-31.5047768715252,"24"
export_AJP SEB_A5_A05_CD8 _2020-06-15,1390.074829,154.605423,1359.991577,266.882538,-70.974709,1222.734985,55.768772,20872.59375,665.161499,531.544006,2087.509033,FALSE,-23.6885796366689,-20.4424813202755,"2"
export_AJP SEB_A5_A05_CD8 _2020-06-15,2468.014893,156.839813,470.168915,162.979996,-47.100464,630.060669,49.319714,1756.250122,53.147545,900.288208,92.597496,FALSE,12.4432247073666,6.83071341418051,"15"
export_AJP SEB_A5_A05_CD8 _2020-06-15,959.67688,275.180054,327.084229,150.528564,1278.411377,988.374817,-375.469421,-336.978546,545.033325,23719.369141,-104.991707,FALSE,23.6910456630294,-37.1848615040527,"25"
export_AJP SEB_A5_A05_CD8 _2020-06-15,431.942139,109.091187,311.057495,133.450256,28.48501,50.616745,55.344456,2998.950195,222.390488,1473.28479,239.600357,FALSE,2.72385639537944,-9.11493466419676,"9"
export_AJP SEB_A5_A05_CD8 _2020-06-15,-17.987003,5.929006,335.862976,95.612251,149.912766,45.792152,-1.961564,109.940742,564.065979,135.836746,364.741547,FALSE,4.28823542214628,-6.76803885981148,"9"
export_AJP SEB_A5_A05_CD8 _2020-06-15,9622.821289,59.13715,509.840424,2249.564453,1588.192871,341.79129,158.491302,66.727737,235.163681,1062.378296,381.071838,FALSE,32.6314261850987,27.4888775100471,"23"
export_AJP SEB_A5_A05_CD8 _2020-06-15,146.285004,144.424652,394.869293,588.262451,1430.216309,127.70018,570.940125,2360.260742,2809.763428,576.841309,-0.134969,TRUE,14.5035481220481,-5.84871215823675,"28"
export_AJP SEB_A5_A05_CD8 _2020-06-15,2809.734131,153.578262,163.664169,70.674736,162.974442,7.219131,-81.563454,5736.467285,1046.985474,155.335922,334.638947,FALSE,14.5568938349142,11.6150547008184,"15"
export_AJP SEB_A5_A05_CD8 _2020-06-15,483.564453,131.856354,411.216003,2176.404785,740.157532,-57.277126,17.392601,149.113602,614.735168,396.877533,-42.790894,FALSE,18.3304766491842,-4.48794743960643,"11"
export_AJP SEB_A5_A05_CD8 _2020-06-15,699.568481,228.394089,339.008087,151.639069,213.584427,295.582489,41.535614,-64.381195,539.190247,1791.621948,153.724731,FALSE,5.52021677555034,-11.2328300022873,"9"
export_AJP SEB_A5_A05_CD8 _2020-06-15,682.09906,111.841629,350.718384,177.971466,361.193298,266.513733,1.344945,4962.84375,397.881897,487.589325,8959.223633,FALSE,-0.212036183165623,27.915274426292,"14"
export_AJP SEB_A5_A05_CD8 _2020-06-15,-56.47427,43.617912,307.677185,120.275337,330.902283,878.816345,-36.452629,2033.675171,867.913757,6.893953,805.592041,FALSE,-4.11329615721871,-25.2797669240612,"16"
export_AJP SEB_A5_A05_CD8 _2020-06-15,218.882248,2.751874,458.565125,240.733688,1104.079346,1826.459351,57.27388,19403.205078,823.014893,242.887207,146.80188,FALSE,-25.9058794552897,-30.6342579837606,"2"
export_AJP SEB_A5_A05_CD8 _2020-06-15,149.754272,75.012222,525.775452,152.953278,471.565857,1311.729614,66.20739,7036.227539,391.113068,335.900116,987.419678,FALSE,-10.9790874057512,-30.1621619701546,"2"
export_AJP SEB_A5_A05_CD8 _2020-06-15,948.188538,277.868958,385.816833,178.119125,143.409134,190.347122,66.474197,3318.490234,25.402079,233.475113,4584.698242,FALSE,3.90843379813371,12.6339998982002,"14"
export_AJP SEB_A5_A05_CD8 _2020-06-15,304.508636,218.371155,245.651245,547.391357,515.040405,336.439026,-37.63129,1062.275879,607.607666,269.148773,2.829735,FALSE,3.41051497309226,-16.0879378478298,"11"
export_AJP SEB_A5_A05_CD8 _2020-06-15,540.82666,91.983696,266.098724,1035.118164,2055.900146,106.798637,74.412613,1.62008,794.018066,144.749664,136.621948,FALSE,23.9744316511696,-10.1323922936804,"11"
export_AJP SEB_A5_A05_CD8 _2020-06-15,124.718636,113.48204,3036.994629,489.827362,993.153503,260.413361,245.454788,9839.90918,897.030212,832.310913,5879.29834,FALSE,-13.4889557929708,-8.01410585122188,"6"
export_AJP SEB_A5_A05_CD8 _2020-06-15,1198.967651,114.480659,385.104401,281.765381,56.100357,828.285583,331.451599,4386.681641,329.434509,318.570953,2072.836914,FALSE,-9.25487418548358,-18.2166210650368,"16"
export_AJP SEB_A5_A05_CD8 _2020-06-15,276.922913,-3.851369,669.177979,247.893829,775.604858,2389.711426,1247.563599,11737.119141,277.618927,413.941498,950.328552,FALSE,-10.2730093029034,-22.5732534600278,"28"
export_AJP SEB_A5_A05_CD8 _2020-06-15,51.115433,187.483261,349.127594,211.120392,425.819519,812.318542,-59.093788,4915.983398,185.314865,887.597839,372.156006,FALSE,-3.93252719935749,-23.8016879503678,"16"
export_AJP SEB_A5_A05_CD8 _2020-06-15,1333.563477,182.230133,1129.822998,96.023857,10.647187,1377.632446,-2.732823,4558.949219,391.701965,92.958923,1592.68042,FALSE,-12.9730261689531,-23.4508827920668,"16"
export_AJP SEB_A5_A05_CD8 _2020-06-15,20275.119141,237.457397,380.359222,1840.888672,2114.235107,91.806053,28.937412,226.819962,199.125534,1412.244141,453.710327,FALSE,30.3319469538544,34.0077314208492,"5"
export_AJP SEB_A5_A05_CD8 _2020-06-15,-425.516327,97.988411,236.071289,82.937767,288.633698,108.389748,24.487892,1371.435791,221.269882,348.568787,10534.783203,FALSE,-1.70308710768831,29.4110548521118,"14"
export_AJP SEB_A5_A05_CD8 _2020-06-15,291.599274,67.939117,121.579391,146.864548,459.11972,1045.890259,105.160965,725.94458,895.416992,289.690277,244.313843,FALSE,-5.18999108235465,-29.0717388700798,"16"
export_AJP SEB_A5_A05_CD8 _2020-06-15,14.451585,94.162704,120.190765,241.553528,149.760193,176.598282,0.767664,4377.54541,636.766113,110.372192,52.562477,FALSE,-2.12080903081104,-12.0975450838647,"6"
export_AJP SEB_A5_A05_CD8 _2020-06-15,11932.533203,0.66568,203.691544,1012.085388,1056.441772,77.386284,18.039337,664.198242,580.684326,95.112473,394.210205,FALSE,31.0443860943598,33.1983445780139,"23"
export_AJP SEB_A5_A05_CD8 _2020-06-15,749.130432,131.033905,2596.833984,824.09137,4319.246582,1964.538696,6.768084,11204.077148,1406.853394,1285.255493,256.506409,FALSE,-17.8424432735512,-39.4736064394,"13"
export_AJP SEB_A5_A05_CD8 _2020-06-15,3286.215576,150.547958,291.077881,255.813614,631.636902,407.32962,81.0532,6975.708008,423.703339,14.082823,1002.648254,FALSE,18.6523097989443,14.6604710059188,"15"
export_AJP SEB_A5_A05_CD8 _2020-06-15,1037.786377,47.345314,967.974182,138.81041,610.040283,213.248047,110.770828,1194.430054,56.218403,4277.144043,27072.386719,FALSE,-7.93188251402648,52.1963039133678,"22"
export_AJP SEB_A5_A05_CD8 _2020-06-15,957.058533,318.328918,6333.540527,298.615143,249.813446,4192.857422,80.089073,21209.46875,2238.396729,1428.394897,1805.660034,FALSE,-25.5215820506478,-35.3621359380948,"24"
export_AJP SEB_A5_A05_CD8 _2020-06-15,329.22699,121.448059,1632.441895,289.946838,39.886234,1620.717041,-70.329994,5309.793457,330.94812,2022.347412,150.196777,TRUE,-18.7820102930126,-36.4581031454496,"24"
export_AJP SEB_A5_A05_CD8 _2020-06-15,181.548218,133.941284,226.233887,138.383728,521.501343,1094.803833,-229.933151,1427.001831,1130.761108,11568.577148,416.415039,FALSE,11.5717177090455,-33.0719041045539,"25"
export_AJP SEB_A5_A05_CD8 _2020-06-15,544.716492,133.60405,214.811295,81.474228,162.350052,-53.800499,-40.261059,6282.371094,107.331192,325.333954,1119.636353,FALSE,-3.22903132153942,-5.00623068412161,"6"
export_AJP SEB_A5_A05_CD8 _2020-06-15,606.21582,144.570389,395.774506,427.228027,863.10321,177.604675,19.676338,10334.457031,604.261108,165.142349,30.464392,FALSE,-8.83724346646949,-14.4785732071211,"11"
export_AJP SEB_A5_A05_CD8 _2020-06-15,988.11261,201.015152,211.762863,125.575478,307.450623,145.450836,74.642807,6062.365234,4503.59668,-115.289825,108.58622,FALSE,-9.96756187855295,4.61817618520426,"6"
export_AJP SEB_A5_A05_CD8 _2020-06-15,292.773682,81.438782,1623.214844,58.122356,886.761414,1080.887573,42.43161,5912.61084,1851.788452,169.373032,821.898804,FALSE,-8.09132437433463,-26.3315675939077,"24"
export_AJP SEB_A5_A05_CD8 _2020-06-15,154.23999,100.139069,140.514099,208.976517,800.480225,1617.480835,-144.863358,2039.623779,3274.432861,479.545929,85.44178,FALSE,-10.9732770380644,-30.5780966175634,"24"
export_AJP SEB_A5_A05_CD8 _2020-06-15,1492.759033,155.144943,278.182922,272.113281,64.667603,918.303955,47.121296,3747.936768,256.967804,230.842499,7301.430176,FALSE,-8.46476031389838,-0.353631225699542,"14"
export_AJP SEB_A5_A05_CD8 _2020-06-15,4686.885742,136.097839,2442.831055,899.439087,603.080688,187.299118,47.074245,30636.007813,572.49469,460.804169,906.083618,FALSE,-13.3149837799821,-0.674056103343342,"15"
export_AJP SEB_A5_A05_CD8 _2020-06-15,17.592606,87.892845,231.66597,183.673233,1185.523193,589.84198,-68.174698,3089.126953,656.89917,129.08345,240.004272,FALSE,-0.0656583759581046,-25.4972962314515,"11"
export_AJP SEB_A5_A05_CD8 _2020-06-15,10395.117188,113.160774,739.464722,730.271179,2151.715576,199.277786,-31.005608,4.952086,425.128601,1184.028198,302.805908,FALSE,33.6284968028893,31.7519532257125,"23"
export_AJP SEB_A5_A05_CD8 _2020-06-15,147.554428,183.393448,512.279114,50.720367,480.33197,996.842957,-159.976807,2597.397705,613.20636,5478.165527,162.50621,FALSE,0.294393945194143,-29.5185231032132,"25"
export_AJP SEB_A5_A05_CD8 _2020-06-15,391.300842,148.375519,254.936401,152.378738,862.611572,1348.182739,-59.273964,948.445007,1306.842407,11004.210938,198.137665,FALSE,1.83358658922476,-37.2315769663922,"25"
export_AJP SEB_A5_A05_CD8 _2020-06-15,6319.197754,209.869324,1237.735474,963.953125,2113.779297,255.873947,14.103813,289.295135,299.045471,1547.148193,430.772888,FALSE,32.7574496257794,22.0337362739296,"23"
export_AJP SEB_A5_A05_CD8 _2020-06-15,136.6978,58.096748,267.298706,94.276817,1294.791504,392.62674,-7.188819,-63.750576,961.540039,230.59375,230.660385,FALSE,6.9708284714672,-18.8011280505532,"11"
export_AJP SEB_A5_A05_CD8 _2020-06-15,15232.768555,130.456772,355.493469,4000.403076,1786.166382,206.658844,84.098747,-33.037117,613.117432,241.914017,264.98291,FALSE,29.3677278238941,32.2570461017617,"23"
export_AJP SEB_A5_A05_CD8 _2020-06-15,19709.708984,4.070329,447.822174,163.649643,88.331963,318.364227,23.961224,14265.204102,10.294633,1232.984375,216.378662,TRUE,30.0319122364041,35.5149731856688,"5"
export_AJP SEB_A5_A05_CD8 _2020-06-15,513.620544,133.93602,728.962769,608.805603,1131.961182,495.771057,25.208086,6482.530273,722.809814,556.654968,135.160049,FALSE,-1.2022977864579,-23.6206711680927,"11"
export_AJP SEB_A5_A05_CD8 _2020-06-15,5560.782227,71.393448,437.925995,309.67807,2319.109619,173.575256,-613.179626,-169.970901,266.189636,50041.878906,-965.513611,FALSE,33.8979949352202,-41.7287280249086,"12"
export_AJP SEB_A5_A05_CD8 _2020-06-15,-24.097471,171.433914,217.794983,180.198257,507.584564,234.171906,148.578613,318.289642,1428.83374,-128.562073,133.794357,FALSE,4.45234569772797,-9.24360412894015,"9"
export_AJP SEB_A5_A05_CD8 _2020-06-15,155.967972,213.65332,3909.256348,344.738373,1075.174072,324.585693,57.740215,2950.395508,219.316788,1881.333862,357.33609,FALSE,0.512954961464434,-12.2550965080151,"6"
export_AJP SEB_A5_A05_CD8 _2020-06-15,1316.047241,100.598953,340.423248,225.499222,849.824768,538.240356,46.542072,5728.701172,215.907196,185.924927,972.59436,FALSE,-3.49346430319982,-16.6966085645698,"11"
export_AJP SEB_A5_A05_CD8 _2020-06-15,304.817535,34.207783,354.879761,325.043549,291.953888,1483.00769,5.263386,3930.814697,4025.762939,234.263626,5170.492188,FALSE,-26.6346154522287,-14.3432241449295,"24"
export_AJP SEB_A5_A05_CD8 _2020-06-15,589.768677,91.15715,2076.381836,657.871643,1735.605591,1692.866333,91.389969,8877.121094,550.531189,1093.307251,2472.903564,FALSE,-16.9308858280888,-35.034203431187,"24"
export_AJP SEB_A5_A05_CD8 _2020-06-15,309.695404,30.022879,214.497742,150.704834,815.846985,1155.909424,17.515863,6786.611816,1497.705688,672.151001,23.560404,FALSE,-7.70197630124306,-31.1172468746769,"16"
export_AJP SEB_A5_A05_CD8 _2020-06-15,-45.348,138.541992,221.023438,161.295746,1302.77478,1226.19519,-88.590614,12774.091797,1012.496887,432.519623,79.321014,FALSE,-16.6704636394151,-27.9396910015329,"2"
export_AJP SEB_A5_A05_CD8 _2020-06-15,247.099518,94.626076,378.013947,167.218643,507.534729,960.685974,79.751282,2703.939697,395.951691,1102.196289,174.617676,FALSE,-4.56637218505378,-27.9874892307611,"16"
export_AJP SEB_A5_A05_CD8 _2020-06-15,-309.755127,85.569305,214.776611,175.763229,1007.491699,167.032761,-30.455519,15669.541016,2118.724121,12.529803,332.8414,FALSE,-17.7993969465501,-13.5646013861496,"2"
export_AJP SEB_A5_A05_CD8 _2020-06-15,341.107147,197.259399,1152.200562,189.964157,39.83223,438.074463,49.438591,5388.194824,116.069283,430.022339,2707.295654,FALSE,-7.13404545256672,-14.0239207238109,"6"
export_AJP SEB_A5_A05_CD8 _2020-06-15,482.9953,96.355766,342.678223,858.347595,946.823181,107.535225,165.411179,506.819855,630.662231,451.652435,60.773132,FALSE,11.269247275223,-6.80889891098712,"11"
export_AJP SEB_A5_A05_CD8 _2020-06-15,61.193687,548.536926,1823.883301,1188.043701,827.762817,857.530884,30.653152,1741.670532,677.059631,2438.483887,1184.39624,FALSE,0.730148065411223,-26.8693416784414,"24"
export_AJP SEB_A5_A05_CD8 _2020-06-15,174.130829,82.602753,530.511963,249.57576,314.347046,642.218689,86.581932,731.335144,402.785034,1291.520264,143.308792,FALSE,-0.0177820712520849,-22.8924844641184,"16"
export_AJP SEB_A5_A05_CD8 _2020-06-15,43.374714,199.155548,1731.72937,336.683411,1016.664063,1183.639404,20.665133,13804.848633,470.851868,593.622681,2764.773926,FALSE,-16.1338169222393,-24.9520592664625,"24"
export_AJP SEB_A5_A05_CD8 _2020-06-15,390.983398,202.818588,290.051331,126.491173,201.307037,2836.966797,-37.07806,3801.109131,43.999542,6700.600586,-134.544189,FALSE,-24.2983228439776,-40.3754841892326,"24"
export_AJP SEB_A5_A05_CD8 _2020-06-15,16596.892578,145.510071,185.169708,805.307251,1480.825562,-0.507833,71.758484,499.315338,813.897705,43.885727,411.285553,FALSE,30.4571284555654,34.3807095835969,"5"
export_AJP SEB_A5_A05_CD8 _2020-06-15,797.987488,209.968948,811.532654,230.875259,153.629135,656.980103,20.137224,6418.104004,78.799652,457.578735,7338.254395,FALSE,-9.43992004968036,2.43485120959728,"10"
export_AJP SEB_A5_A05_CD8 _2020-06-15,1178.042725,169.182114,14.480678,53.956902,257.714325,98.483131,-140.912537,4276.408691,4403.624023,608.077576,1126.983521,FALSE,-11.3299893134867,5.54754441620975,"6"
export_AJP SEB_A5_A05_CD8 _2020-06-15,967.030029,77.125046,381.815399,-5.798888,2365.748291,2193.710693,-1564.548584,270.919769,992.665527,73257.65625,95.93367,TRUE,44.3384158551047,-36.0648901190881,"27"
export_AJP SEB_A5_A05_CD8 _2020-06-15,391.588043,144.188293,264.184235,334.512848,-7.016981,105.148491,-72.874008,198.014862,1211.365234,606.142883,70.738968,FALSE,5.86872310172898,-7.15273226090932,"9"
export_AJP SEB_A5_A05_CD8 _2020-06-15,11745.803711,86.525124,242.054504,1229.501831,1033.698242,126.497993,41.797813,247.402878,94.198799,1293.401489,162.743362,FALSE,30.6158954375127,32.6252775414219,"23"
export_AJP SEB_A5_A05_CD8 _2020-06-15,36.862427,64.567566,117.783752,50.872093,807.353455,1420.792725,65.96965,4410.3125,2665.699463,-89.109489,384.794739,FALSE,-10.6243105878446,-31.7817287243333,"24"
export_AJP SEB_A5_A05_CD8 _2020-06-15,432.263123,190.154388,312.084229,419.039886,140.110672,88.857246,43.784256,939.545776,1154.332397,297.038666,99.473877,FALSE,5.77007903517016,-6.0626258139296,"9"
export_AJP SEB_A5_A05_CD8 _2020-06-15,22563.625,163.836945,489.740845,1332.92688,920.416138,375.161377,52.567024,-189.720062,784.638245,627.274963,2860.458984,FALSE,27.4850258491339,34.1283671972325,"5"
export_AJP SEB_A5_A05_CD8 _2020-06-15,3016.195313,63.269547,508.179779,217.971436,289.080811,400.476349,-3.952537,3681.915283,215.002563,69.591927,1985.710938,FALSE,15.1821082442666,13.929218705729,"15"
export_AJP SEB_A5_A05_CD8 _2020-06-15,396.558563,34.271091,335.348175,58.152599,1098.645142,219.722549,-542.495544,310.534912,433.193726,25448.066406,-336.667969,FALSE,27.9584707188284,-36.3548128808776,"25"
export_AJP SEB_A5_A05_CD8 _2020-06-15,-17.602867,119.121552,1989.954346,374.821045,1163.288574,2379.696777,-19.056623,13697.691406,813.440796,347.23172,263.861542,TRUE,-24.8322647272042,-38.3021212437344,"24"
export_AJP SEB_A5_A05_CD8 _2020-06-15,66.598404,131.839508,1061.839233,569.37262,1901.886963,1803.210327,-23.374851,18357.710938,1154.299438,427.335022,281.686066,FALSE,-24.1325603807342,-31.4858425535583,"2"
export_AJP SEB_A5_A05_CD8 _2020-06-15,-231.828751,174.461014,592.117798,115.911507,559.577576,1772.369141,47.182774,5235.57373,120.726791,484.145233,6174.617676,FALSE,-16.0296164839996,-29.3887800104388,"24"
export_AJP SEB_A5_A05_CD8 _2020-06-15,7917.558105,129.419525,184.609467,1048.229736,1759.065918,84.984772,84.010139,1568.904175,233.809525,913.628296,1188.975342,FALSE,32.8513226237304,26.900662977144,"23"
export_AJP SEB_A5_A05_CD8 _2020-06-15,314.898102,285.429199,430.64151,207.62442,714.607483,1039.813843,13.282075,724.761597,573.272827,5193.809082,439.861237,FALSE,-1.0931684725177,-32.2334577875555,"25"
export_AJP SEB_A5_A05_CD8 _2020-06-15,468.23175,60.550507,1973.112061,208.232895,801.676819,1041.599854,4.415234,2057.73584,575.915344,5622.033691,761.499146,FALSE,-2.00492471429287,-30.0508614598474,"24"
export_AJP SEB_A5_A05_CD8 _2020-06-15,1306.024902,187.94902,302.233246,78.982407,262.84021,406.710114,45.376801,1907.46875,176.13385,278.123993,4707.413086,TRUE,4.71941574630624,8.8311675940087,"14"
export_AJP SEB_A5_A05_CD8 _2020-06-15,1627.198608,89.286224,1474.261841,222.0401,1242.927856,428.54483,36.139446,306.994659,288.715118,5379.53418,3200.20752,FALSE,14.7029282291494,-6.21716313333235,"10"
export_AJP SEB_A5_A05_CD8 _2020-06-15,1366.544434,91.889908,786.835205,-146.108017,2002.366333,2031.459961,-964.660706,-386.568451,132.689056,56800.195313,-767.544067,FALSE,35.7229584699675,-36.6244207081042,"27"
export_AJP SEB_A5_A05_CD8 _2020-06-15,1992.512939,215.65152,232.979523,97.956467,94.613747,220.124161,67.432373,166.081818,66.347717,2479.142822,2591.915527,FALSE,14.3338640179682,8.82068210439966,"9"
export_AJP SEB_A5_A05_CD8 _2020-06-15,-997.885864,115.282372,656.351624,288.910004,805.849304,510.912811,108.018097,2925.679932,55.249622,239.783569,11356.828125,FALSE,-3.25884169798835,27.9637662957788,"14"
export_AJP SEB_A5_A05_CD8 _2020-06-15,12268.259766,167.125549,787.954346,1444.4104,1450.711792,35.029976,11.429747,1119.205566,205.026901,2779.807861,488.138702,FALSE,31.849848403317,33.0917839054756,"23"
export_AJP SEB_A5_A05_CD8 _2020-06-15,-42.333939,198.483902,1276.711426,374.260681,737.67865,181.815002,60.098377,2076.515869,408.367279,823.591736,1435.988281,FALSE,2.97041868692008,-12.9162313258031,"6"
export_AJP SEB_A5_A05_CD8 _2020-06-15,707.435608,158.686295,385.150391,8.642251,2092.420166,537.803406,-532.77887,340.243805,39.02285,39816.039063,97.526123,FALSE,35.2134431677898,-37.986580806834,"27"
export_AJP SEB_A5_A05_CD8 _2020-06-15,5489.245117,104.235657,209.339981,596.945862,2223.934814,254.405457,155.289795,240.938644,753.915222,288.555023,118.085213,FALSE,34.8999973057131,20.8722861277625,"30"
export_AJP SEB_A5_A05_CD8 _2020-06-15,1355.009766,141.143723,658.509766,280.130127,154.799149,718.358154,13.560622,4120.833496,194.393539,390.53775,2619.36499,FALSE,-6.12930590067365,-12.9057208521567,"16"
export_AJP SEB_A5_A05_CD8 _2020-06-15,2422.677246,150.141357,565.572815,193.357208,277.209717,1417.361816,143.495316,5719.495605,1988.990967,140.809128,10240.030273,FALSE,-25.4713754150962,-2.32180902842534,"14"
export_AJP SEB_A5_A05_CD8 _2020-06-15,657.960449,208.165695,342.600983,445.66684,303.555695,678.58905,164.868683,10373.855469,625.321594,530.751343,388.760773,FALSE,-11.0132050042757,-19.7461472154048,"6"
export_AJP SEB_A5_A05_CD8 _2020-06-15,1885.695923,102.838615,189.026505,119.847626,-87.147926,302.166046,116.263565,1236.150391,3755.969727,236.999557,289.189728,FALSE,-4.3842894256736,6.74428536268423,"6"
export_AJP SEB_A5_A05_CD8 _2020-06-15,726.425659,98.82431,2594.400391,1964.703613,1591.582886,2682.650146,171.424149,17941.927734,1903.510742,1720.300659,285.682465,FALSE,-26.1067262121792,-38.563823954608,"24"
export_AJP SEB_A5_A05_CD8 _2020-06-15,1823.308594,104.809906,835.643494,1106.299927,816.567688,1473.825073,-66.883186,5607.394043,1646.466675,7606.964355,104.443909,FALSE,-5.71477106592516,-36.2388056500056,"25"
export_AJP SEB_A5_A05_CD8 _2020-06-15,76.206741,200.047668,353.355011,316.924408,139.801453,94.626862,45.49881,4037.536377,-17.322277,919.680969,109.185165,FALSE,0.197067739963309,-12.3746923225517,"9"
export_AJP SEB_A5_A05_CD8 _2020-06-15,602.750061,168.862793,918.689453,168.652802,567.824036,172.294693,127.81501,5044.646484,131.007187,1151.128296,505.144135,FALSE,-1.31797355321051,-12.7569090954948,"6"
export_AJP SEB_A5_A05_CD8 _2020-06-15,532.684753,194.708588,701.445618,25.266737,391.71109,389.98938,401.668732,4125.713867,176.210419,927.154114,233.420898,FALSE,-4.11209334868403,-11.1276049207312,"16"
export_AJP SEB_A5_A05_CD8 _2020-06-15,744.27655,162.773178,755.735291,229.577332,1384.69751,1190.763184,7.458908,14603.443359,231.128632,1162.063843,428.34787,FALSE,-15.8648557957236,-29.5878638139248,"2"
export_AJP SEB_A5_A05_CD8 _2020-06-15,1692.152588,158.99675,471.641022,73.872185,337.230835,189.359238,163.843536,31269.599609,361.622345,2330.073975,2499.641846,FALSE,-31.1074219627352,-18.9434816334096,"3"
export_AJP SEB_A5_A05_CD8 _2020-06-15,374.230438,222.64386,537.648926,160.259003,908.283508,1972.404785,147.261826,26558.75,1015.242676,1083.812988,66.214607,FALSE,-27.9177513861721,-29.0268045766835,"2"
export_AJP SEB_A5_A05_CD8 _2020-06-15,1533.204346,45.316669,310.464264,231.8013,82.611687,280.708374,19.869619,8483.543945,218.419769,227.252335,1212.475098,FALSE,-3.44962737179428,-3.10947079133268,"15"
export_AJP SEB_A5_A05_CD8 _2020-06-15,1.003818,275.786102,518.244263,387.608337,589.388733,341.474335,39.326931,1429.873291,386.530884,3206.418213,352.720032,FALSE,6.127968639144,-23.548804708676,"25"
export_AJP SEB_A5_A05_CD8 _2020-06-15,1845.1604,77.554199,471.632996,120.195992,147.146423,732.904541,31.671499,6237.388672,25.065048,225.678833,1260.282593,FALSE,-5.48756779235472,-9.69336721068703,"15"
export_AJP SEB_A5_A05_CD8 _2020-06-15,842.379517,54.017586,78.645706,-0.961716,976.694275,674.797607,-194.412201,7934.832031,4423.650391,202.61322,812.23291,FALSE,-22.6545474186748,-6.78509719589971,"6"
export_AJP SEB_A5_A05_CD8 _2020-06-15,-700.519348,82.193016,435.628174,299.418213,751.164185,139.03775,-49.431034,1024.937988,214.789398,1678.755493,54216.675781,FALSE,-10.5880618211305,56.1272848280733,"22"
export_AJP SEB_A5_A05_CD8 _2020-06-15,-6.636488,71.10585,2343.204834,646.854797,11.547843,911.935608,32.529209,10750.754883,182.740692,932.219788,353.529175,FALSE,-9.96709870076111,-17.4350650705953,"24"
export_AJP SEB_A5_A05_CD8 _2020-06-15,-96.789436,162.080475,432.264191,-19.413065,840.280701,1341.11084,23.945648,31229.058594,650.901855,294.820862,164.117111,FALSE,-29.4498379545487,-25.5342240427412,"2"
export_AJP SEB_A5_A05_CD8 _2020-06-15,1239.147583,210.41008,310.283417,188.496658,133.623138,674.638916,-23.002337,500.512543,1517.201294,275.710419,2219.879883,FALSE,-0.00886579842651109,-8.21049523598266,"16"
export_AJP SEB_A5_A05_CD8 _2020-06-15,1171.291748,141.981781,671.261902,216.240387,746.683655,591.245544,126.205025,1038.206909,450.671417,745.445007,720.723755,FALSE,2.67101915198197,-13.3622468473495,"16"
export_AJP SEB_A5_A05_CD8 _2020-06-15,-58.734596,111.569939,245.649689,103.629646,202.674408,63.651611,34.133556,51.447887,122.779076,568.527039,4926.036133,FALSE,0.0819497432199734,10.6638769185471,"9"
export_AJP SEB_A5_A05_CD8 _2020-06-15,1662.182861,38.63686,922.730042,81.305939,787.693909,1824.364014,11.800006,11725.297852,667.668213,1321.474609,32113.947266,FALSE,-16.3137836212891,33.7783630330185,"22"
export_AJP SEB_A5_A05_CD8 _2020-06-15,6111.464355,69.07798,198.707031,140.862549,219.896851,363.388519,-38.577782,93.269646,1154.532227,26.546858,296.514191,TRUE,22.3817677930452,21.3378974384756,"15"
export_AJP SEB_A5_A05_CD8 _2020-06-15,-125.882324,101.94165,780.381958,186.765305,218.0896,2356.343262,-4.859968,6784.246582,1335.413574,348.987946,1652.862915,FALSE,-19.6880443207896,-33.8118623679865,"24"
export_AJP SEB_A5_A05_CD8 _2020-06-15,1368.305664,72.663689,610.848633,181.70076,40.412441,578.319702,-35.152802,5231.966797,256.237213,263.120636,3522.699951,FALSE,-3.81813478251678,-4.20802246214171,"14"
export_AJP SEB_A5_A05_CD8 _2020-06-15,73.858253,120.560593,234.930847,75.426636,950.747375,218.226852,6.95108,-158.851273,757.989685,171.417648,47.24651,FALSE,7.79170983970183,-13.8710088985488,"11"
export_AJP SEB_A5_A05_CD8 _2020-06-15,305.863922,187.291336,720.584351,261.447662,548.161804,804.390076,80.844887,4280.487305,251.593491,561.259705,3740.397949,FALSE,-7.96937340083194,-24.2059526304546,"10"
export_AJP SEB_A5_A05_CD8 _2020-06-15,9413.166016,462.934418,259.144012,2437.760498,1311.037598,189.881393,-108.945786,-10.878032,1483.759399,544.877991,288.696381,FALSE,32.9570128077246,28.3778160227464,"23"
export_AJP SEB_A5_A05_CD8 _2020-06-15,-1019.90625,153.281586,571.201721,227.423813,924.511597,127.837807,38.168949,506.075836,150.845749,5692.702637,42611.675781,FALSE,-8.65273486303851,56.0282431505428,"22"
export_AJP SEB_A5_A05_CD8 _2020-06-15,265.450592,72.075394,1246.170532,130.788925,208.488449,1321.055298,283.331879,2782.105713,81.114883,589.807556,4468.748535,FALSE,-12.6521780498493,-25.6644745525427,"16"
export_AJP SEB_A5_A05_CD8 _2020-06-15,62.737034,105.734741,234.015884,109.348358,416.718964,393.596527,-81.590408,25.344757,1275.588379,347.786163,30.955738,FALSE,3.46413379857507,-15.2170100950127,"16"
export_AJP SEB_A5_A05_CD8 _2020-06-15,-36.282845,103.179298,243.753632,175.334595,377.897125,290.683258,80.597626,36.064053,143.225967,70.042503,802.476746,FALSE,2.32100371846292,-12.0925795819302,"16"
export_AJP SEB_A5_A05_CD8 _2020-06-15,531.027161,211.846588,394.913574,125.043755,-10.894217,177.023453,59.241535,3469.697754,1000.946411,95.391548,283.016418,FALSE,-1.54311961789868,-7.06689176794333,"6"
export_AJP SEB_A5_A05_CD8 _2020-06-15,964.700378,92.902725,265.067078,344.3302,279.748169,367.761353,3.796003,3438.589844,138.903992,178.459534,2307.62207,FALSE,0.49867660013764,-6.29106105279403,"16"
export_AJP SEB_A5_A05_CD8 _2020-06-15,736.340759,137.187134,1120.855347,219.766464,94.745636,2582.265869,-54.366169,8116.804199,97.604958,205.243057,2964.031006,FALSE,-23.4764183445724,-32.3243462344164,"24"
export_AJP SEB_A5_A05_CD8 _2020-06-15,933.950989,177.260254,774.485718,355.573547,1518.249634,2477.666992,-23.991537,24371.337891,1675.335815,997.342102,148.044098,FALSE,-28.5467116396311,-32.0201505148347,"2"
export_AJP SEB_A5_A05_CD8 _2020-06-15,1861.101563,116.191704,264.830048,179.078934,19.246952,620.072571,6.779068,536.776001,643.374023,696.461121,10899.564453,FALSE,-2.00864430078546,30.440424111061,"14"
export_AJP SEB_A5_A05_CD8 _2020-06-15,357.654633,161.062851,2108.327393,305.419159,261.446289,222.809341,46.604984,3839.191162,634.598022,592.72113,1226.412109,FALSE,-2.36745067510103,-8.72664571047186,"6"
export_AJP SEB_A5_A05_CD8 _2020-06-15,-73.259636,211.561554,69.882133,200.662949,334.905426,1392.509033,-4.852043,9291.180664,1983.139648,283.32254,1010.62323,FALSE,-14.2503569260323,-29.7513444732564,"2"
export_AJP SEB_A5_A05_CD8 _2020-06-15,417.513062,229.88974,779.951172,46.096428,275.917511,193.544373,-33.964249,-182.416763,221.864777,2026.891724,40381.652344,FALSE,-9.12810398300947,55.076657575941,"22"
export_AJP SEB_A5_A05_CD8 _2020-06-15,213.351822,220.462982,402.140564,179.411942,276.477081,608.007141,146.112823,3703.096924,156.476181,-20.967772,1185.349365,FALSE,-4.61815496393493,-19.3472679250587,"16"
export_AJP SEB_A5_A05_CD8 _2020-06-15,49.235435,153.989929,233.422424,412.819946,1507.422974,1327.702637,-48.919689,3868.497803,580.959106,253.162674,304.744446,FALSE,-7.78307321859596,-34.1900628698284,"13"
export_AJP SEB_A5_A05_CD8 _2020-06-15,435.19223,117.554031,240.559418,64.755302,712.978394,235.917709,77.312592,-34.502533,81.348228,80.63205,1009.141479,FALSE,5.52527168361884,-8.64691085435308,"11"
export_AJP SEB_A5_A05_CD8 _2020-06-15,289.531891,98.208206,2941.66626,1099.111938,438.761597,560.853149,59.160603,4334.216309,2837.21167,483.021271,1862.567383,FALSE,-3.26548531029735,-14.4923818262516,"6"
export_AJP SEB_A5_A05_CD8 _2020-06-15,22943.666016,50.315731,215.700485,1065.142456,2499.381104,-157.220551,-58.887527,128.843552,125.391876,889.150024,15.230587,FALSE,31.3408571849007,35.3287978148819,"5"
export_AJP SEB_A5_A05_CD8 _2020-06-15,262.574097,208.602722,766.19635,202.991882,899.550842,1288.19043,42.469151,200.347427,215.807755,3285.987305,894.196716,FALSE,-6.06252928036831,-33.1650402082986,"16"
export_AJP SEB_A5_A05_CD8 _2020-06-15,438.900269,228.662476,2649.279053,1033.257568,1444.27356,2348.152344,-24.128908,18134.279297,1822.704102,317.658295,2307.124023,FALSE,-26.8841912969353,-34.3714334655761,"24"
export_AJP SEB_A5_A05_CD8 _2020-06-15,8773.634766,236.142242,191.065552,424.305176,1118.831055,234.100128,6.180083,352.813782,634.332214,2271.196289,628.426636,FALSE,30.6756554230571,28.6157234459919,"23"
export_AJP SEB_A5_A05_CD8 _2020-06-15,6858.740723,246.1978,1400.81665,300.671509,573.665649,852.307922,148.654984,5127.388184,697.253601,393.604401,475.746002,FALSE,21.1489422293408,22.2494385522979,"15"
export_AJP SEB_A5_A05_CD8 _2020-06-15,75.497444,168.28183,320.625183,142.309341,503.336548,108.804863,26.716412,485.445129,168.55719,112.963867,715.657898,FALSE,4.54736756040749,-8.83724213230018,"9"
export_AJP SEB_A5_A05_CD8 _2020-06-15,11854.444336,73.22834,255.680237,1344.088135,1562.02478,0.631398,-31.297819,164.390167,304.632416,909.656738,223.557648,FALSE,32.0619681741539,32.7696974163081,"23"
export_AJP SEB_A5_A05_CD8 _2020-06-15,9851.822266,218.489655,123.894958,958.209961,1440.867554,3.487881,21.87499,-577.68103,329.416656,5870.927246,307.07016,FALSE,31.3430297341337,30.2331029971893,"23"
export_AJP SEB_A5_A05_CD8 _2020-06-15,1860.282593,90.053368,191.515198,154.869446,404.901001,575.062622,172.061447,1258.462158,1131.843994,269.387207,483.31604,FALSE,7.93728703821093,0.742765030532742,"16"
export_AJP SEB_A5_A05_CD8 _2020-06-15,139.332657,199.016632,2647.200684,337.383392,821.671875,2125.608887,292.56604,20836.892578,558.350586,989.409058,3808.176025,FALSE,-28.0701235113462,-31.7377618004052,"24"
export_AJP SEB_A5_A05_CD8 _2020-06-15,19066.605469,127.68718,371.720215,436.046692,2474.744873,94.221207,118.681694,70.177567,122.061661,910.171082,315.143341,FALSE,30.4984518702255,34.2409223900535,"5"
export_AJP SEB_A5_A05_CD8 _2020-06-15,15302.615234,-1.069477,352.857178,52.814785,754.68634,290.982635,84.074287,10864.040039,290.661011,180.922913,3202.536133,FALSE,26.10017476197,32.8283523218023,"5"
export_AJP SEB_A5_A05_CD8 _2020-06-15,811.701111,162.799652,320.705811,991.766357,1194.647339,392.375336,64.46064,5929.024414,190.582504,413.186035,763.500977,FALSE,2.50916285269339,-22.3441290117124,"11"
export_AJP SEB_A5_A05_CD8 _2020-06-15,609.23877,59.873348,-3.038173,294.57608,810.631226,47.514782,68.228516,6423.824707,5058.767578,377.183228,15758.322266,FALSE,-10.2582578718841,38.9313428467508,"1"
export_AJP SEB_A5_A05_CD8 _2020-06-15,4483.310547,108.38987,295.497864,82.49762,193.132782,500.504425,19.32509,3.923688,2.752354,901.081665,654.267334,FALSE,22.0834370672916,15.4191657625643,"15"
export_AJP SEB_A5_A05_CD8 _2020-06-15,479.994812,27.702747,398.746613,114.356804,426.92392,444.342285,67.063278,7148.116211,126.7687,498.093628,1636.913818,FALSE,-7.85308534876955,-18.1737756419553,"16"
export_AJP SEB_A5_A05_CD8 _2020-06-15,7867.075684,177.191666,2636.484375,986.02771,2300.900635,194.343033,-89.49218,-7.713282,419.021393,2092.975586,210.610825,FALSE,32.9760945995075,25.9296619349127,"23"
export_AJP SEB_A5_A05_CD8 _2020-06-15,366.214966,83.751862,1825.196777,626.341248,1275.873413,303.954254,-39.62336,4540.458984,1210.325317,353.456848,464.363739,FALSE,2.09749015424615,-16.5011214296675,"6"
export_AJP SEB_A5_A05_CD8 _2020-06-15,725.600708,99.523193,320.203369,114.662956,546.193787,1366.156982,-1.786855,10.997439,1397.192505,109.77108,197.45015,TRUE,-15.1051915793649,-37.8003815524663,"24"
export_AJP SEB_A5_A05_CD8 _2020-06-15,804.015564,176.709213,783.866394,206.246872,810.4422,101.47113,64.465866,18011.193359,164.811859,1978.161621,29134.394531,FALSE,-11.6921109537736,40.2740322880031,"1"
export_AJP SEB_A5_A05_CD8 _2020-06-15,214.805328,174.235489,4103.167969,537.259094,1196.086304,1425.771851,442.538818,34901.242188,584.931335,1260.255249,2603.375977,FALSE,-32.1380945349994,-24.8962483045826,"24"
export_AJP SEB_A5_A05_CD8 _2020-06-15,426.607422,177.211151,781.647766,542.007446,360.930267,819.63678,-19.16361,15598.495117,506.989502,2020.645142,363.582367,TRUE,-25.9758893241758,-24.9151849065246,"2"
export_AJP SEB_A5_A05_CD8 _2020-06-15,683.741516,194.438721,1684.945923,487.851013,1256.254028,733.919434,165.706543,3655.546387,211.178818,861.202454,1081.472046,FALSE,-1.91389718813424,-25.0397989326318,"24"
export_AJP SEB_A5_A05_CD8 _2020-06-15,168.123215,128.639816,228.467636,122.947182,174.509567,237.122971,19.180218,3806.881592,144.077805,266.754333,9845.494141,FALSE,-0.575018231795212,28.5775071288612,"14"
export_AJP SEB_A5_A05_CD8 _2020-06-15,13049.004883,124.218666,834.732361,368.514923,852.126648,31.70059,16.66905,9063.014648,356.041534,355.501129,990.648926,FALSE,30.365394300448,34.5012690982348,"5"
export_AJP SEB_A5_A05_CD8 _2020-06-15,785.687439,95.046898,851.019775,146.91539,81.198158,229.234177,17.290707,3709.232178,356.907471,-7.612832,1193.789185,FALSE,-0.883264162438598,-5.67255775272627,"9"
export_AJP SEB_A5_A05_CD8 _2020-06-15,1231.711792,171.750488,339.414307,307.166443,750.1203,347.512512,111.526466,1390.558105,604.962769,317.665955,74.677208,FALSE,9.67979615259882,-3.10966995130009,"11"
export_AJP SEB_A5_A05_CD8 _2020-06-15,194.052765,130.100967,787.316895,228.646301,385.778625,1623.668091,57.765015,2600.981445,1313.55249,456.590515,15512.366211,FALSE,-24.0221580677155,6.15223709849917,"14"
export_AJP SEB_A5_A05_CD8 _2020-06-15,-193.489319,102.133087,191.703979,117.150536,622.89917,503.029266,42.993351,37.935383,-6.075669,760.383545,701.165161,FALSE,2.27293078839598,-21.367108331636,"11"
export_AJP SEB_A5_A05_CD8 _2020-06-15,-103.964172,60.824932,2026.785889,717.984436,760.608459,753.625977,77.646675,765.875549,263.613434,1394.834473,3956.841797,FALSE,-3.70005810739315,-19.6731621336737,"16"
export_AJP SEB_A5_A05_CD8 _2020-06-15,242.82959,44.099171,182.863129,230.003052,160.002914,164.763962,39.881184,33.54771,2.637705,335.869995,780.372192,FALSE,4.28503035283697,-7.30447041975474,"9"
export_AJP SEB_A5_A05_CD8 _2020-06-15,738.398315,119.64212,462.938599,142.53241,16.734232,864.914124,356.771515,4460.790527,127.573174,167.929123,728.270691,FALSE,-9.05423223054683,-19.6527849812788,"16"
export_AJP SEB_A5_A05_CD8 _2020-06-15,7093.715332,185.143677,759.537903,1865.276489,2105.883789,536.395325,-20.100307,469.341125,148.293503,3703.352295,229.342636,FALSE,34.3651691981371,24.100540507805,"23"
export_AJP SEB_A5_A05_CD8 _2020-06-15,6996.291504,129.1698,683.203857,676.565613,841.302185,253.765533,-111.617401,371.610229,450.235352,7384.572754,181.962097,FALSE,27.9707058702516,23.1261604254214,"12"
export_AJP SEB_A5_A05_CD8 _2020-06-15,194.506943,107.013168,376.671234,91.33094,611.444397,461.53064,200.326279,859.745056,149.622406,236.476059,1930.925781,FALSE,0.0990368925289327,-14.6186400803241,"16"
export_AJP SEB_A5_A05_CD8 _2020-06-15,6.136609,191.71022,400.218597,199.747803,603.644958,601.190247,35.994614,5631.868164,38.963371,1316.994385,401.488892,FALSE,-2.46361822840868,-23.6891358884682,"11"
export_AJP SEB_A5_A05_CD8 _2020-06-15,-26.64613,104.457726,1916.751465,244.528702,165.424652,2864.191406,179.346268,8054.246582,6495.31543,422.58725,2942.373779,FALSE,-24.3781698380272,-27.4830600517721,"24"
export_AJP SEB_A5_A05_CD8 _2020-06-15,73.076187,193.542511,404.142242,536.812317,1259.857544,206.517181,26.821894,2499.571777,163.494568,192.317383,884.468262,FALSE,7.43055291904832,-17.923879998813,"11"
export_AJP SEB_A5_A05_CD8 _2020-06-15,-474.478882,40.710941,374.738739,303.887604,859.224487,486.660767,18.202145,2325.428711,206.686264,206.68959,8351.576172,FALSE,-2.54486355806214,21.6458365579501,"14"
export_AJP SEB_A5_A05_CD8 _2020-06-15,-137.677963,109.530952,451.359436,326.422882,281.559692,733.838745,52.721203,12130.431641,399.378082,543.29071,13748.921875,FALSE,-16.0892938402294,22.7583904480758,"10"
export_AJP SEB_A5_A05_CD8 _2020-06-15,2842.184082,178.402222,1710.874146,351.310944,2185.757324,639.035461,-78.909866,160.390152,852.338318,2049.624512,-43.176956,FALSE,24.2793224419986,7.46918534406743,"15"
export_AJP SEB_A5_A05_CD8 _2020-06-15,2008.283081,183.030457,280.777771,710.815063,751.646606,435.048584,-283.725189,42.17223,1046.961426,16655.183594,-323.690979,FALSE,21.8976294295716,-36.3556918847923,"25"
export_AJP SEB_A5_A05_CD8 _2020-06-15,748.397095,90.649719,410.002869,96.359413,696.548828,1044.528076,-161.583618,1887.152344,110.061195,15125.260742,6139.824219,FALSE,14.4752343986215,-31.2838987877877,"10"
export_AJP SEB_A5_A05_CD8 _2020-06-15,217.358551,197.600845,515.778748,178.675797,834.647888,1678.758789,37.286327,17423.875,1339.548462,476.280823,168.192154,FALSE,-24.788545952743,-30.4001116044404,"2"
export_AJP SEB_A5_A05_CD8 _2020-06-15,7187.530273,169.400467,498.561493,1145.656372,1988.268921,371.940125,-24.5984,89.158195,2033.019653,1108.87915,382.943695,FALSE,34.1577647707208,24.727554598824,"23"
export_AJP SEB_A5_A05_CD8 _2020-06-15,-251.681183,102.620384,662.697021,460.913025,548.391235,575.576965,-23.464773,-120.63929,492.729462,397.533722,4758.02002,FALSE,-0.601837505874004,-7.39289074143238,"14"
export_AJP SEB_A5_A05_CD8 _2020-06-15,227.236954,159.222519,520.046082,374.173828,310.353546,2337.860352,46.129551,3909.320313,731.075867,697.926392,394.101227,FALSE,-19.3709877869463,-35.2642426026421,"24"
export_AJP SEB_A5_A05_CD8 _2020-06-15,1378.627808,223.421051,441.729187,203.903366,-297.256287,56.672577,-28.481075,4213.192383,75.477959,1042.334717,147.139908,FALSE,7.84163182476106,3.29827947866855,"6"
export_AJP SEB_A5_A05_CD8 _2020-06-15,1349.902832,137.802399,378.244598,2505.529541,2358.48584,368.571777,103.331505,-51.544788,675.752197,233.749863,358.427246,FALSE,36.8879068190406,-0.545694447361453,"30"
export_AJP SEB_A5_A05_CD8 _2020-06-15,4784.17334,41.140583,1559.1875,737.033081,1328.682007,894.231018,46.983723,16786.080078,571.796448,303.119446,215.775421,FALSE,17.009443484118,22.4758521367277,"15"
export_AJP SEB_A5_A05_CD8 _2020-06-15,-568.839172,92.977051,612.143433,303.999512,301.394958,869.483215,98.486481,9318.494141,451.870239,416.010345,2807.631592,FALSE,-10.816152794091,-23.5192024904528,"16"
export_AJP SEB_A5_A05_CD8 _2020-06-15,290.255341,174.274994,3448.315674,168.179871,535.958862,1112.080933,0.99717,1033.607788,503.312927,4587.563477,287.162781,FALSE,-5.00084382051984,-24.4559643528513,"24"
export_AJP SEB_A5_A05_CD8 _2020-06-15,611.685181,131.397491,1090.892212,248.348022,443.62207,1606.896729,149.446625,6290.016602,7051.26416,171.748764,1660.058105,FALSE,-36.3960749268238,-3.5573415792588,"2"
export_AJP SEB_A5_A05_CD8 _2020-06-15,88.747414,174.493576,1465.023682,194.13121,599.965637,2790.057129,-62.450569,5914.523438,12401.101563,207.387817,2433.80957,FALSE,-45.9463372993391,0.565899607949143,"7"
export_AJP SEB_A5_A05_CD8 _2020-06-15,232.602386,99.246971,566.094849,276.332947,140.623901,925.085693,9.401155,9821.300781,335.579987,794.14563,7971.001953,FALSE,-17.2933783879043,-12.6180886002494,"10"
export_AJP SEB_A5_A05_CD8 _2020-06-15,345.161377,71.393112,517.637268,40.885529,219.825104,1847.44812,-9.717245,3100.299805,745.700684,172.634827,-1.939641,FALSE,-14.4705440744933,-32.0514341237249,"24"
export_AJP SEB_A5_A05_CD8 _2020-06-15,729.373657,142.856384,895.206909,51.334488,1084.949829,197.980423,-234.551346,-50.498802,930.248535,17501.255859,-523.766785,FALSE,21.6778271368362,-33.6332259666394,"25"
export_AJP SEB_A5_A05_CD8 _2020-06-15,321.62323,68.887314,437.227783,120.803818,302.020538,239.614136,28.637863,656.51416,149.863647,117.226463,722.445801,TRUE,5.34545569718525,-5.62846891587945,"9"
export_AJP SEB_A5_A05_CD8 _2020-06-15,5582.344727,198.45018,277.99295,103.87178,113.956093,392.23999,62.43285,248.744614,106.207314,900.380676,409.804962,FALSE,23.9838511935028,18.9012592801627,"15"
export_AJP SEB_A5_A05_CD8 _2020-06-15,293.005341,152.89357,230.837097,142.682816,4.706264,390.009155,61.658024,6352.440918,673.580261,137.50885,255.082764,FALSE,-6.72601224893097,-14.259236402888,"16"
export_AJP SEB_A5_A05_CD8 _2020-06-15,1266.232056,181.283829,1801.098633,493.437927,750.771057,904.733887,225.606277,12390.789063,220.099808,384.123749,1333.855835,FALSE,-14.2898158307845,-21.2483731357729,"24"
export_AJP SEB_A5_A05_CD8 _2020-06-15,255.599243,127.501534,800.378235,252.235611,647.517334,1338.302612,100.887009,12873.860352,1514.14563,167.751236,324.584076,FALSE,-16.1275712809535,-28.6380762571461,"2"
export_AJP SEB_A5_A05_CD8 _2020-06-15,1508.23291,174.737167,-16.390436,36.083103,312.506073,601.940247,316.528961,2807.180664,8313.132813,73.18428,1919.478027,FALSE,-32.416175204445,10.7557954039088,"7"
export_AJP SEB_A5_A05_CD8 _2020-06-15,997.105347,168.655579,1264.575073,662.190979,504.377106,708.567322,118.070587,18773.003906,767.56781,393.649567,142.838303,FALSE,-20.1270470605342,-17.5909284777051,"2"
export_AJP SEB_A5_A05_CD8 _2020-06-15,584.553833,167.033615,2751.882324,259.624756,1404.373169,2521.922852,-18.302814,10762.330078,3326.347656,306.228973,6645.878418,FALSE,-24.4903286283453,-35.6345686431154,"24"
export_AJP SEB_A5_A05_CD8 _2020-06-15,149.132782,177.671967,548.420593,253.530319,910.386414,235.448364,35.820213,4811.556641,360.895477,536.669189,2621.542236,FALSE,-0.60810977795234,-12.9417017153778,"11"
export_AJP SEB_A5_A05_CD8 _2020-06-15,8959.272461,349.079773,846.615601,785.881958,1837.286133,581.38208,-47.439877,-441.089661,753.693481,10742.637695,376.26297,FALSE,31.2884711941557,27.1610726236767,"12"
export_AJP SEB_A5_A05_CD8 _2020-06-15,407.973022,61.736893,530.763123,129.338272,544.043396,293.069733,66.617226,404.431946,32.471184,2931.282715,127.12207,FALSE,5.44641220559213,-18.7746590160816,"25"
export_AJP SEB_A5_A05_CD8 _2020-06-15,561.039795,141.196518,1173.219116,247.271393,-81.55928,2772.181885,32.121277,4927.430664,5188.20459,469.247894,3081.448242,FALSE,-23.9329411333278,-31.1614384175406,"24"
export_AJP SEB_A5_A05_CD8 _2020-06-15,1846.338135,93.787369,342.583862,140.676636,234.222458,449.395782,-2.338268,235.187103,80.909554,366.986542,788.952698,FALSE,13.4454228628902,4.65364956061704,"16"
export_AJP SEB_A5_A05_CD8 _2020-06-15,6571.427734,29.404718,245.376556,796.539124,1996.834106,674.409424,-48.584385,590.052673,168.072327,960.309631,260.08374,FALSE,32.6450268186529,23.1933116840069,"23"
export_AJP SEB_A5_A05_CD8 _2020-06-15,1297.952881,203.299088,944.737,69.963593,1774.230591,1233.33374,-1.693151,8702.881836,361.960236,575.1427,7603.668945,FALSE,-18.141629752087,-25.7618889928037,"10"
export_AJP SEB_A5_A05_CD8 _2020-06-15,10717.979492,68.539192,290.542023,443.933838,1712.827271,211.829102,128.369293,326.105408,909.103088,357.965057,25.477692,FALSE,32.2823975804844,32.1142041747434,"23"
export_AJP SEB_A5_A05_CD8 _2020-06-15,8009.13623,144.449554,422.007629,231.887772,1648.510986,273.775604,157.865158,402.537903,222.417603,2595.42334,1628.555054,FALSE,32.3812629507033,26.8852203914467,"23"
export_AJP SEB_A5_A05_CD8 _2020-06-15,48.262268,148.967453,150.208084,112.071846,411.070648,556.178955,70.309921,356.809082,185.156937,137.139221,887.893982,FALSE,-0.070293413187166,-20.3629570605954,"16"
export_AJP SEB_A5_A05_CD8 _2020-06-15,1.464152,108.988213,301.337738,44.465611,839.147583,400.603424,36.053516,-118.289879,67.676575,241.69548,1082.22522,FALSE,3.21562552594734,-17.4914696810112,"11"
export_AJP SEB_A5_A05_CD8 _2020-06-15,38.468788,158.932388,1595.902222,100.416893,411.801483,600.175293,-60.532764,14720.414063,231.910995,387.172333,1008.804932,FALSE,-16.1823188649725,-14.2907359236127,"2"
export_AJP SEB_A5_A05_CD8 _2020-06-15,477.216614,7.194251,651.363342,147.651093,577.797852,1831.154663,-121.123749,1044.128784,5591.181641,288.134155,175.923737,TRUE,-41.2766548496579,-1.92192500333427,"7"
export_AJP SEB_A5_A05_CD8 _2020-06-15,202.280212,102.273613,1141.018188,148.695084,154.899033,1232.350342,85.405807,7561.978027,91.972733,297.811646,4683.733887,FALSE,-13.5553786127262,-23.0020988975049,"2"
export_AJP SEB_A5_A05_CD8 _2020-06-15,595.705444,74.605911,523.221802,36.124214,41.020226,835.370789,56.189861,3911.655762,581.514343,969.861511,-45.11161,FALSE,-5.48762451720438,-21.7230356680024,"16"
export_AJP SEB_A5_A05_CD8 _2020-06-15,-161.853577,7.165679,405.027039,199.096207,56.75135,100.954407,48.410084,1711.424438,975.336853,464.33139,4229.507813,FALSE,-0.780631550667692,8.58194721791867,"9"
export_AJP SEB_A5_A05_CD8 _2020-06-15,128.863678,161.429901,192.6362,534.054138,1315.057495,94.301819,15.529342,9.716681,953.658447,109.649178,167.971024,FALSE,13.4323917682748,-15.0087222631173,"11"
export_AJP SEB_A5_A05_CD8 _2020-06-15,559.108276,78.150391,259.705841,172.835815,-30.34166,229.299957,36.018784,3303.495361,217.741058,968.496521,19.519085,FALSE,0.387776305450562,-10.8543289100635,"6"
export_AJP SEB_A5_A05_CD8 _2020-06-15,2.707728,159.537262,760.75531,234.688797,239.445938,341.678833,9.133049,26368.132813,649.305176,149.273132,346.095856,FALSE,-27.5065043620107,-18.7385441771226,"3"
export_AJP SEB_A5_A05_CD8 _2020-06-15,194.691208,59.152973,535.580078,648.518555,1066.64917,176.183777,-10.251614,10929.134766,1440.961182,308.440216,182.915787,FALSE,-9.19565788281672,-15.391213964075,"11"
export_AJP SEB_A5_A05_CD8 _2020-06-15,24076.708984,180.855927,793.520264,2000.358521,2455.570801,551.603333,84.841194,-2.503439,1427.863281,521.691956,349.560822,FALSE,29.2356040941515,34.5171990267537,"5"
export_AJP SEB_A5_A05_CD8 _2020-06-15,221.719116,111.978134,377.300323,153.343124,566.88446,1949.421997,33.01281,267.84082,143.180206,237.757935,905.830811,FALSE,-15.0575319370224,-34.5356266060262,"24"
export_AJP SEB_A5_A05_CD8 _2020-06-15,416.008972,158.197372,3803.148438,109.051132,3981.708496,2482.742188,42.610806,13408.349609,362.198792,727.85437,3970.087646,FALSE,-23.5904761159324,-38.3780987846478,"24"
export_AJP SEB_A5_A05_CD8 _2020-06-15,830.428528,90.55629,481.289185,212.890045,281.940735,619.57196,-159.679764,4248.867188,4483.931641,304.393311,11322.989258,FALSE,-10.7986847250336,29.3952251347601,"21"
export_AJP SEB_A5_A05_CD8 _2020-06-15,14306.280273,211.266068,1870.327026,586.040405,1414.728638,781.816956,2.929771,243.830139,390.081451,7168.317871,610.926819,FALSE,30.5894830465695,32.1177637555777,"23"
export_AJP SEB_A5_A05_CD8 _2020-06-15,194.063034,41.561909,449.556335,407.489227,1141.678467,1234.043823,59.262901,2141.984375,1992.252319,169.98204,303.207977,FALSE,-7.03143648245632,-32.4481249458639,"16"
export_AJP SEB_A5_A05_CD8 _2020-06-15,414.546448,192.551178,2345.804199,914.88147,1041.966553,2387.087646,198.741684,20162.919922,917.51593,669.733154,1146.2948,FALSE,-27.6980435833959,-34.0329253346574,"24"
export_AJP SEB_A5_A05_CD8 _2020-06-15,236.559601,115.870995,107.448196,82.004684,223.725616,247.803482,20.07077,37.197506,613.756287,333.129852,555.938477,FALSE,4.0185822729886,-10.4399535131939,"9"
export_AJP SEB_A5_A05_CD8 _2020-06-15,979.73468,176.979355,633.371521,107.931015,261.391022,984.06134,42.137104,2059.36084,327.412384,468.842346,1734.692993,FALSE,-7.19727203036478,-24.0407446587878,"16"
export_AJP SEB_A5_A05_CD8 _2020-06-15,586.212646,143.106155,-544.884277,296.519257,580.795776,837.017395,-1339.645752,14099.444336,24738.925781,-85.51841,-162.983063,FALSE,-36.6825808075067,36.7215160459004,"20"
export_AJP SEB_A5_A05_CD8 _2020-06-15,4677.717285,143.322281,236.670197,67.756828,96.582359,31.222975,27.577147,1255.693115,202.677841,1104.092163,294.107086,FALSE,22.883635092699,16.93142561312,"15"
export_AJP SEB_A5_A05_CD8 _2020-06-15,15641.700195,101.758224,104.226044,638.707703,1147.177246,-6.517804,40.806728,-106.757988,1222.531494,112.002426,156.921417,FALSE,30.7084935128757,34.4360321106913,"5"
export_AJP SEB_A5_A05_CD8 _2020-06-15,1494.656372,184.814331,569.259033,332.525726,156.108047,642.736755,19.850126,2485.647461,198.279556,408.31012,8413.961914,FALSE,-1.58730699831356,23.41403659896,"14"
export_AJP SEB_A5_A05_CD8 _2020-06-15,60.204468,145.456009,363.948456,185.996933,259.938934,485.023865,-355.494019,193.74472,607.245667,17763.458984,7415.597656,FALSE,16.876322573432,-16.4597812857795,"10"
export_AJP SEB_A5_A05_CD8 _2020-06-15,9035.416992,101.546799,-12.108568,1976.21228,1953.279297,-67.346123,-165.35405,-340.089294,2769.476074,186.884003,161.001648,FALSE,35.2204859144565,29.4092367373405,"23"
export_AJP SEB_A5_A05_CD8 _2020-06-15,7064.269043,109.697807,734.384216,302.180298,202.578461,1332.066895,1.382409,17949.611328,6375.026855,565.527466,1546.177124,FALSE,19.6384770706053,33.2514356386323,"15"
export_AJP SEB_A5_A05_CD8 _2020-06-15,232.314224,62.438332,1088.04126,199.81282,1024.405029,900.195923,-101.682312,16543.458984,2586.369629,390.840271,56.890965,FALSE,-19.6192403392525,-19.1603667438828,"2"
export_AJP SEB_A5_A05_CD8 _2020-06-15,155391.25,201.896454,203.052856,1278.315918,2263.390625,2208.104492,-61.759026,3504.156006,128.843231,1305.220703,1035.961792,FALSE,16.6918471691598,62.605063352794,"5"
export_AJP SEB_A5_A05_CD8 _2020-06-15,502.615692,155.949097,1158.765137,441.933868,1261.963745,3341.020508,40.19511,6003.632813,995.984619,421.39975,271.09314,FALSE,-27.2297761665767,-38.1540728493054,"24"
export_AJP SEB_A5_A05_CD8 _2020-06-15,3227.729248,217.48259,383.770477,133.534698,92.2015,1533.536377,-49.010193,11116.095703,1389.733521,199.962128,3111.388916,FALSE,-12.0509081014911,-10.5056599806286,"2"
export_AJP SEB_A5_A05_CD8 _2020-06-15,22538.65625,142.974731,559.091858,607.095886,1737.641968,509.156525,433.324249,272.851868,340.238251,1285.229248,176.753036,FALSE,27.3074697796382,34.7271920920951,"5"
export_AJP SEB_A5_A05_CD8 _2020-06-15,-17.617872,102.623703,337.888885,563.205811,942.224182,420.586517,2.861026,3319.859131,624.700378,243.386597,325.794891,FALSE,2.44218211554089,-22.2158129999411,"11"
export_AJP SEB_A5_A05_CD8 _2020-06-15,751.873779,86.604095,1622.781006,217.266388,1005.02124,2698.074707,492.897644,2508.711426,17341.306641,-56.544941,1672.282104,FALSE,-41.0392279563617,4.47672130145721,"7"
export_AJP SEB_A5_A05_CD8 _2020-06-15,61.475822,52.937012,354.018738,73.778633,750.507813,199.720505,94.92421,191.197708,555.488098,112.123962,289.555206,FALSE,4.99994715650744,-10.7321565276714,"11"
export_AJP SEB_A5_A05_CD8 _2020-06-15,443.486969,24.857058,-0.332068,100.900795,97.14489,129.482391,-173.981171,2939.448975,4679.01416,120.871887,-64.195259,FALSE,-10.6664691938509,4.5825782759174,"8"
export_AJP SEB_A5_A05_CD8 _2020-06-15,4795.40918,154.122849,280.205566,-120.193977,301.630524,-30.062159,125.33136,6708.875977,-184.860611,19651.587891,644.240173,FALSE,16.8221554867725,-0.842645790424906,"12"
export_AJP SEB_A5_A05_CD8 _2020-06-15,5078.655762,61.787895,221.471832,144.973633,82.193687,46.861595,-72.451797,15184.24707,1204.706421,168.86351,157.737991,FALSE,18.7838867297899,22.3527281730101,"15"
export_AJP SEB_A5_A05_CD8 _2020-06-15,9089.067383,240.575287,1188.723633,590.192566,2681.119873,616.946106,165.821045,1680.173706,42.831196,894.895264,253.025177,FALSE,33.8745497690537,28.5907341665731,"23"
export_AJP SEB_A5_A05_CD8 _2020-06-15,1102.515625,164.739731,2661.724609,416.030914,112.425224,695.945007,103.424644,12459.740234,362.165192,1090.196411,13776.916016,FALSE,-17.8087012075484,13.381089691325,"10"
export_AJP SEB_A5_A05_CD8 _2020-06-15,340.853455,200.728027,2107.142578,432.695801,1095.355347,1334.270874,-217.584244,11940.558594,655.721619,10298.419922,1169.046509,FALSE,-5.98122406655429,-35.1862983499842,"25"
export_AJP SEB_A5_A05_CD8 _2020-06-15,482.321747,105.555458,951.815613,140.872437,100.994354,1346.171997,46.034969,3316.761719,204.418442,302.434906,1464.060913,FALSE,-10.7998355192928,-26.9762106891476,"24"
export_AJP SEB_A5_A05_CD8 _2020-06-15,177.874908,59.284893,956.692322,336.71524,621.401306,1213.125488,-21.051992,1693.185425,1899.244751,562.43634,799.760071,FALSE,-6.67603537998702,-29.939889493548,"24"
export_AJP SEB_A5_A05_CD8 _2020-06-15,-257.979095,59.712326,227.463806,22.666437,1189.314941,2133.83252,47.984043,15654.117188,1030.221069,182.31192,229.45787,FALSE,-23.093245549171,-32.921909488658,"2"
export_AJP SEB_A5_A05_CD8 _2020-06-15,-457.032318,121.555374,1066.897461,271.216095,1197.149902,2450.523193,26.34057,33929.324219,2132.068604,969.061218,4904.261719,FALSE,-33.5209070766468,-29.2487943030984,"2"
export_AJP SEB_A5_A05_CD8 _2020-06-15,981.60614,115.028954,285.812775,190.252289,34.693432,409.147614,69.853256,3954.620361,7.196876,215.217972,5063.637695,FALSE,1.59018491690539,9.04501770147971,"14"
export_AJP SEB_A5_A05_CD8 _2020-06-15,-20.504887,192.492676,1385.037842,206.130615,-16.652794,3666.224121,501.012054,9030.257813,223.462753,1387.889893,1686.544312,FALSE,-20.6733022921832,-35.2064250277,"24"
export_AJP SEB_A5_A05_CD8 _2020-06-15,6551.200684,119.846863,1209.841309,721.329224,1727.605347,168.252792,45.605244,936.245361,537.942566,666.913635,720.018738,FALSE,30.6611572415444,22.4574659329536,"23"
export_AJP SEB_A5_A05_CD8 _2020-06-15,11958.222656,230.471146,153.526031,1900.208618,1440.92749,41.327816,-26.322418,409.499817,19.456301,713.672852,884.511169,FALSE,31.0941841084272,32.0224568255575,"23"
export_AJP SEB_A5_A05_CD8 _2020-06-15,502.88147,160.12738,307.52951,418.838959,1190.953979,142.904007,69.722343,-0.592987,796.232605,54.190723,358.72641,FALSE,12.5007626902733,-8.90697231257007,"11"
export_AJP SEB_A5_A05_CD8 _2020-06-15,1859.015503,112.814095,292.634796,126.871956,66.893143,1425.56897,140.114258,8304.908203,20.249002,190.134842,1360.672974,FALSE,-14.2030628883006,-25.6380948936521,"2"
export_AJP SEB_A5_A05_CD8 _2020-06-15,-75.338165,68.763725,545.126892,432.352203,610.799561,485.49765,10.690447,12014.473633,607.731689,207.097397,141.262527,FALSE,-12.9064477047484,-17.3312992664693,"2"
export_AJP SEB_A5_A05_CD8 _2020-06-15,1128.730835,148.708542,1741.006226,439.125763,1418.644653,792.983582,181.032715,3164.571045,2442.957275,271.455963,364.848755,FALSE,-1.33747333331916,-22.4026456430166,"24"
export_AJP SEB_A5_A05_CD8 _2020-06-15,116.371948,177.556961,361.223846,135.665192,287.585571,189.009262,-35.552959,451.37616,703.242554,675.569092,91.618774,FALSE,5.16322436767785,-12.1716202817527,"9"
export_AJP SEB_A5_A05_CD8 _2020-06-15,1208.64563,126.876099,-583.066833,96.847885,478.453613,9.876293,-374.280823,5490.508301,16481.132813,-219.074112,7942.059082,FALSE,-34.9011590867053,27.4900972853654,"20"
export_AJP SEB_A5_A05_CD8 _2020-06-15,1989.306152,241.130081,403.136963,490.380554,2929.502197,732.96167,-5.286672,2964.208252,-0.066119,1222.33667,110.367561,FALSE,17.3851263071953,-15.9807791483218,"15"
export_AJP SEB_A5_A05_CD8 _2020-06-15,410.567993,143.231995,710.676514,154.21759,264.324005,852.042969,-24.092049,6868.310059,194.670303,1404.594238,132.020248,FALSE,-6.00927789618186,-21.969309458851,"16"
export_AJP SEB_A5_A05_CD8 _2020-06-15,176.067535,161.643753,299.051941,150.75769,856.140442,644.994995,114.809158,2906.035156,1109.606812,230.988174,157.263443,FALSE,-0.931419408649543,-24.1688565723591,"11"
export_AJP SEB_A5_A05_CD8 _2020-06-15,210.495743,69.69471,250.361008,302.313049,1151.376465,188.173203,-145.562393,1318.302979,247.2258,11849.578125,-473.581146,FALSE,20.2037613967444,-33.2119586655023,"25"
export_AJP SEB_A5_A05_CD8 _2020-06-15,9099.375977,151.663879,310.49939,152.22464,160.414871,12.735835,8.347702,11932.123047,39.24905,937.263977,308.509338,FALSE,22.5190844490376,28.4596569694075,"5"
export_AJP SEB_A5_A05_CD8 _2020-06-15,14933.589844,111.699478,608.222412,399.851715,632.963745,35.93037,7.687191,331.846436,115.267685,1287.073853,-64.399734,FALSE,31.0031089582561,34.3803564566315,"5"
export_AJP SEB_A5_A05_CD8 _2020-06-15,391.751465,66.746765,272.813873,118.933609,276.310455,743.289307,91.383011,252.374405,16.903149,293.026825,796.865356,FALSE,-2.32323288808758,-22.7653875924533,"16"
export_AJP SEB_A5_A05_CD8 _2020-06-15,1645.007568,70.78743,614.981567,133.815262,350.316772,-137.398193,105.18766,1168.96936,296.746582,967.435669,53136.972656,FALSE,-11.1156367922868,55.7192876628793,"22"
export_AJP SEB_A5_A05_CD8 _2020-06-15,530.251831,217.220703,1094.42041,486.673004,1514.39209,1887.991211,114.75441,3377.241943,1006.203613,368.53537,410.079193,FALSE,-16.0374215427873,-36.735972093452,"24"
export_AJP SEB_A5_A05_CD8 _2020-06-15,309.251801,74.92025,95.131439,245.388336,686.398621,562.507629,10.20429,9732.926758,1859.387695,-41.73177,381.892853,FALSE,-10.8731410864685,-19.7940260402911,"16"
export_AJP SEB_A5_A05_CD8 _2020-06-15,809.281982,164.644089,1223.472534,227.058182,406.759277,1219.755981,-123.125565,6013.982422,790.184631,4683.270996,-76.934288,TRUE,-5.70827397278694,-33.6924842777983,"25"
export_AJP SEB_A5_A05_CD8 _2020-06-15,110.831337,15.89871,260.328857,590.06604,904.608154,566.328369,0.175716,5650.785645,1168.817749,80.12941,373.143127,FALSE,-1.82758247383467,-25.0932112252952,"11"
export_AJP SEB_A5_A05_CD8 _2020-06-15,236.612259,89.878746,236.190933,196.687927,47.785942,420.479736,60.680073,916.199829,103.334671,135.231827,8234.154297,FALSE,-0.921213278373284,23.6407978327359,"14"
export_AJP SEB_A5_A05_CD8 _2020-06-15,249.087631,144.400726,160.271942,407.828156,980.932861,383.318298,33.613319,1908.571045,1005.274841,197.104858,212.400345,FALSE,4.4459244931674,-19.9192220489886,"11"
export_AJP SEB_A5_A05_CD8 _2020-06-15,352.038971,86.963211,94.411659,324.098999,62.691456,805.791748,115.074043,4799.452637,960.839417,612.140808,99.492287,FALSE,-4.89311843931114,-23.6845380239544,"16"
export_AJP SEB_A5_A05_CD8 _2020-06-15,2244.30542,93.651077,0.846475,120.653984,146.582779,14.736659,-314.244293,-762.849731,5157.362305,1928.54834,31090.806641,FALSE,-10.1942287252167,52.0678472198297,"22"
export_AJP SEB_A5_A05_CD8 _2020-06-15,10781.78125,382.438599,387.162415,491.182892,1316.547729,251.533035,196.011429,682.132568,343.833252,713.343689,1073.680786,FALSE,31.1668690248667,31.99025661772,"23"
export_AJP SEB_A5_A05_CD8 _2020-06-15,403.763153,182.527344,1619.464722,185.467941,722.142029,118.758621,9.820737,1338.733765,454.236603,376.253204,4321.44873,FALSE,2.80148752283155,10.7333389951621,"6"
export_AJP SEB_A5_A05_CD8 _2020-06-15,11563.750977,198.202911,263.828705,2979.484131,2664.69043,-46.088001,136.845505,358.556366,1251.423096,163.472275,103.590309,FALSE,33.7467034931927,31.697179483881,"23"
export_AJP SEB_A5_A05_CD8 _2020-06-15,192.732712,98.353088,468.952057,241.743073,549.915283,312.527588,30.685339,5096.144531,-0.259178,520.927002,1298.28772,FALSE,-2.16873173197343,-16.6097045913737,"11"
export_AJP SEB_A5_A05_CD8 _2020-06-15,633.886475,58.961693,1221.369995,219.95137,435.779419,1573.415649,188.898026,18068.066406,1375.517578,582.481689,1811.044189,FALSE,-22.7677543690542,-28.0343012205477,"2"
export_AJP SEB_A5_A05_CD8 _2020-06-15,777.338013,72.887398,700.184814,96.455849,193.223175,1489.314941,47.867474,4167.895996,389.559479,100.064934,3218.562988,FALSE,-13.0407695353146,-27.3289531703276,"24"
export_AJP SEB_A5_A05_CD8 _2020-06-15,-35.73534,182.887024,343.634552,907.100891,1155.078857,152.060638,99.259308,155.763199,780.869019,402.701141,111.256493,FALSE,12.3388944795444,-12.9884354999907,"11"
export_AJP SEB_A5_A05_CD8 _2020-06-15,2143.655762,192.442749,317.291595,173.343292,103.676643,-200.288162,-110.264091,101.582191,1034.061768,1940.338257,58297.304688,FALSE,-11.4350886577323,57.0375665963506,"22"
export_AJP SEB_A5_A05_CD8 _2020-06-15,13085.257813,50.941505,224.667694,2268.115234,1690.990845,-74.403725,-24.93541,-151.292206,753.926331,244.283508,190.12439,FALSE,31.9806090548669,33.0420743910573,"23"
export_AJP SEB_A5_A05_CD8 _2020-06-15,556.935425,245.423843,2260.754395,246.535019,630.316528,484.872528,117.012245,11907.943359,1464.965454,2325.392578,277.688232,FALSE,-8.4162255075661,-15.2882733323625,"6"
export_AJP SEB_A5_A05_CD8 _2020-06-15,11011.052734,18.654932,117.061256,1376.321045,3048.530762,222.587555,169.903732,636.098938,363.795959,76448.882813,781.405579,FALSE,26.8400940677053,-37.6968734987838,"27"
export_AJP SEB_A5_A05_CD8 _2020-06-15,6675.648438,52.161198,677.817322,144.187134,454.510193,442.182678,66.415657,11473.443359,895.962646,-12.329351,247.930374,TRUE,19.7195684763519,23.8016750471678,"15"
export_AJP SEB_A5_A05_CD8 _2020-06-15,40.644051,236.266464,818.781433,251.49707,1219.254761,1312.449097,11.246614,9613.0625,162.548874,471.827179,1594.525269,FALSE,-11.8011771386754,-31.6586097387491,"13"
export_AJP SEB_A5_A05_CD8 _2020-06-15,1261.904907,77.101082,669.943481,239.976028,98.541565,215.428528,-118.579842,3347.812744,2706.231934,450.160767,8833.370117,FALSE,-1.87164534265735,28.3756410144532,"21"
export_AJP SEB_A5_A05_CD8 _2020-06-15,384.867981,72.952545,2906.049805,510.498169,3133.266357,3163.681396,-15.992568,12376.661133,3094.048828,906.956177,7299.262207,TRUE,-28.4233380509932,-39.2806063162038,"24"
export_AJP SEB_A5_A05_CD8 _2020-06-15,107.346268,257.171265,777.842468,309.545074,656.549683,2300.794922,-87.732368,6541.774414,3747.239746,471.854858,3657.429443,FALSE,-18.7708585260914,-32.661662508064,"24"
export_AJP SEB_A5_A05_CD8 _2020-06-15,-85.721115,125.514931,767.067932,100.261093,635.242615,2150.985596,26.236115,51665.128906,1097.105225,516.209412,436.275604,FALSE,-32.8691855965686,-24.6782231766813,"3"
export_AJP SEB_A5_A05_CD8 _2020-06-15,749.86792,199.104141,-1112.040405,215.712936,713.951416,901.122375,-1273.996094,6934.928711,25896.548828,252.368011,9748.466797,FALSE,-36.3566083149248,34.7657350851972,"20"
export_AJP SEB_A5_A05_CD8 _2020-06-15,423.836456,49.78455,265.200531,142.696045,233.150635,907.800598,-176.516968,6408.939941,3838.373291,359.08194,5982.094727,FALSE,-23.8457371129894,-9.44152306195761,"7"
export_AJP SEB_A5_A05_CD8 _2020-06-15,336.964966,133.615448,690.707031,535.844543,1624.995117,232.569962,94.871277,14729.589844,555.390869,415.769135,-5.764479,FALSE,-11.2197266117145,-19.8085891765489,"11"
export_AJP SEB_A5_A05_CD8 _2020-06-15,86.705345,124.673477,605.503296,324.101501,892.879517,516.00824,-37.6917,347.840454,468.07196,395.093842,1336.689453,FALSE,2.12777917076831,-20.4219786206713,"11"
export_AJP SEB_A5_A05_CD8 _2020-06-15,1806.559082,152.455231,566.515686,204.203751,175.436111,964.932007,120.874565,4848.506348,49.977512,176.519089,5922.967773,FALSE,-10.5703685346255,-8.61029235323213,"16"
export_AJP SEB_A5_A05_CD8 _2020-06-15,1769.860474,252.70636,1488.581665,121.361244,581.520325,358.879272,-69.970505,106.73214,576.81427,3402.768311,204.449234,FALSE,12.9080220126657,1.7019651258505,"16"
export_AJP SEB_A5_A05_CD8 _2020-06-15,535.920532,85.286095,2683.479492,192.984818,2224.385254,477.665924,133.405685,24001.017578,346.468323,1171.333252,229.0112,FALSE,-27.843661366767,-18.6679121922785,"24"
export_AJP SEB_A5_A05_CD8 _2020-06-15,730.894226,123.628273,1869.016602,162.113525,644.589783,1167.478394,104.596046,11036.605469,581.495789,457.072693,185.842255,FALSE,-13.5571851458882,-23.3213262518298,"24"
export_AJP SEB_A5_A05_CD8 _2020-06-15,269.30069,135.524979,405.142426,552.721863,302.182068,435.870087,-91.65033,-461.654694,1196.638062,2033.981323,379.204895,FALSE,4.850482772151,-19.4083845227789,"16"
export_AJP SEB_A5_A05_CD8 _2020-06-15,14010.289063,89.166077,997.463684,178.901413,0.33853,353.879852,27.880894,35049.046875,-26.0394,904.301331,391.971741,FALSE,27.6974410001232,37.5507923644521,"3"
export_AJP SEB_A5_A05_CD8 _2020-06-15,-124.632774,93.876328,1786.001343,664.176697,2934.358398,3605.205566,2.285169,40864.074219,551.015991,1019.380432,6.185147,FALSE,-29.2471193966384,-31.1898050901951,"2"
export_AJP SEB_A5_A05_CD8 _2020-06-15,358.883789,95.226486,213.39595,103.855324,164.27597,1946.971924,67.73349,-224.498413,213.63031,500.894836,749.636108,FALSE,-14.9854242075943,-33.5469531047988,"24"
export_AJP SEB_A5_A05_CD8 _2020-06-15,15195.383789,33.983276,237.773422,527.091492,1113.251587,374.896454,-42.496498,8386.371094,749.499146,209.813599,265.053925,FALSE,28.1284429507955,33.6283714384103,"5"
export_AJP SEB_A5_A05_CD8 _2020-06-15,125.411888,118.438667,1274.081299,228.120865,1213.605469,4821.930664,1.705475,35610.109375,2671.458008,-24.146049,2377.08374,TRUE,-30.4177783601328,-39.8958451856973,"3"
export_AJP SEB_A5_A05_CD8 _2020-06-15,162.218124,133.902252,845.837891,277.247101,577.752869,151.195297,-10.160515,4073.239258,390.134705,519.231689,5324.816406,FALSE,0.607970657489223,18.9479588291728,"11"
export_AJP SEB_A5_A05_CD8 _2020-06-15,12467.835938,165.486267,96.838745,1619.664307,1563.244385,20.99848,-79.593491,550.026489,1022.647522,223.497116,176.602524,FALSE,31.8305680489213,32.9437416833653,"23"
export_AJP SEB_A5_A05_CD8 _2020-06-15,876.904053,103.60527,236.62677,590.003418,788.832703,199.136963,11.851563,2637.807861,663.907837,96.459137,293.887268,FALSE,11.1748121056931,-3.31814577561953,"11"
export_AJP SEB_A5_A05_CD8 _2020-06-15,191.592407,59.623016,960.366455,235.8405,177.413864,1217.5625,-32.093189,2278.587891,494.563538,520.950012,10858.22168,FALSE,-17.0251270591482,0.867402823524504,"14"
export_AJP SEB_A5_A05_CD8 _2020-06-15,182.196579,96.517876,2777.545166,199.815735,94.927361,1370.762817,70.599571,1296.890869,1200.39856,1380.443237,433.193329,FALSE,-10.0562425127364,-24.6151361455338,"24"
export_AJP SEB_A5_A05_CD8 _2020-06-15,6524.42334,204.020508,255.240707,1202.169922,1131.861694,68.732246,-20.784485,353.604553,-32.357685,916.356812,135.137299,FALSE,31.4214254644566,21.5196038748266,"23"
export_AJP SEB_A5_A05_CD8 _2020-06-15,25231.423828,250.568359,1065.878052,1101.509644,3653.560059,599.181763,43.261814,-11.979481,428.403717,1314.964722,599.674683,FALSE,29.7414809590306,34.9155491740163,"5"
export_AJP SEB_A5_A05_CD8 _2020-06-15,399.853088,136.345947,342.290344,128.26503,3.879675,110.059006,-48.230782,-242.038742,766.126465,-24.753962,151.61235,FALSE,4.61107108758051,-6.81985420679601,"9"
export_AJP SEB_A5_A05_CD8 _2020-06-15,677.921265,112.515411,750.155945,56.421902,25.106241,658.789185,55.172325,10836.154297,45.839474,344.03183,1771.312378,FALSE,-13.2368466284284,-16.0242605262733,"16"
export_AJP SEB_A5_A05_CD8 _2020-06-15,5530.632324,40.907848,102.499016,161.208939,573.77478,-48.392326,66.501335,2084.314697,828.268982,-21.461531,213.716324,FALSE,25.9295332552122,20.5863303271079,"15"
export_AJP SEB_A5_A05_CD8 _2020-06-15,453.42868,144.602219,486.159729,508.887695,709.058228,48.605526,-87.996437,1084.531372,80.394104,8854.754883,-213.192184,FALSE,14.6049129600265,-28.4158139022305,"25"
export_AJP SEB_A5_A05_CD8 _2020-06-15,8507.356445,201.781876,372.356445,335.294739,2450.110596,182.746735,52.050049,609.788574,74.913025,1307.431274,289.676544,FALSE,34.1687567956503,29.4831203960631,"23"
export_AJP SEB_A5_A05_CD8 _2020-06-15,-87.109512,193.436066,345.487854,239.977539,526.950134,476.03833,84.975876,-149.677109,7705.89502,350.84491,6158.766602,FALSE,-19.6390796345899,18.9801512493904,"7"
export_AJP SEB_A5_A05_CD8 _2020-06-15,-57.962116,148.716278,225.790054,127.597534,160.024536,371.808258,-9.435419,402.957031,876.864502,347.097198,6090.594238,FALSE,-1.96173596695442,14.4511766082377,"9"
export_AJP SEB_A5_A05_CD8 _2020-06-15,228.959305,157.467102,724.811462,165.232224,499.710815,4306.121582,-114.473991,785.801147,9747.705078,321.235809,10517.041016,FALSE,-40.4904384414978,-20.3996232308244,"7"
export_AJP SEB_A5_A05_CD8 _2020-06-15,1314.672607,137.676178,245.00412,779.323059,1109.036499,127.441429,-22.879465,7825.548828,550.614502,31.8862,296.500732,FALSE,8.75677665492906,-1.52225292189284,"11"
export_AJP SEB_A5_A05_CD8 _2020-06-15,919.143066,84.696304,561.743896,303.661713,1175.949707,416.217163,75.754402,6185.396484,97.965897,446.511139,812.821533,FALSE,-2.5027977034795,-20.6452159090202,"11"
export_AJP SEB_A5_A05_CD8 _2020-06-15,335.296997,67.323593,175.368088,192.030655,538.131592,113.434792,-21.903013,33.341396,634.756165,616.927307,284.645355,FALSE,7.36292695766843,-9.50248227358976,"11"
export_AJP SEB_A5_A05_CD8 _2020-06-15,440.966827,201.785995,328.778809,181.56871,-5.867721,610.445313,-52.19939,650.76355,155.694382,990.791992,-11.562258,FALSE,-1.54327849472968,-18.432880823047,"16"
export_AJP SEB_A5_A05_CD8 _2020-06-15,437.998108,138.141968,316.408905,281.361206,693.754272,439.945953,-93.045189,7079.160645,727.932861,4165.417969,245.317657,FALSE,3.58174302588509,-25.5481708578092,"25"
export_AJP SEB_A5_A05_CD8 _2020-06-15,1649.538086,185.237305,623.916565,253.382889,0.51431,776.176941,-3.614739,3530.970947,183.580002,433.161102,11859.96875,FALSE,-5.54610121183184,25.7524749712893,"14"
export_AJP SEB_A5_A05_CD8 _2020-06-15,7150.098633,167.329376,540.881165,643.309021,2692.324219,200.262787,-298.858521,191.404495,686.437073,20985.880859,-532.079529,FALSE,26.1052783170232,11.5514629169867,"12"
export_AJP SEB_A5_A05_CD8 _2020-06-15,264.854004,-6.699347,233.289795,120.144737,189.017258,234.026016,52.142345,1221.0354,105.91864,329.968292,5044.354492,FALSE,0.243088920994219,12.2579133805151,"9"
export_AJP SEB_A5_A05_CD8 _2020-06-15,101.473663,99.414101,170.5923,800.893494,944.668457,148.357681,-27.882223,350.639862,753.339539,-1.109343,150.544754,FALSE,10.485572066594,-13.4273537818316,"11"
export_AJP SEB_A5_A05_CD8 _2020-06-15,333.99646,139.325043,617.813782,496.784424,191.818832,1829.528076,69.466583,8549.198242,812.312744,336.078064,3608.175781,TRUE,-21.1146527864777,-36.4279251812295,"24"
export_AJP SEB_A5_A05_CD8 _2020-06-15,319.827972,134.906845,246.980316,403.902252,1087.898071,445.457153,-17.654095,1005.404114,561.446838,123.71302,144.02739,FALSE,3.65448981664316,-20.3639656208694,"11"
export_AJP SEB_A5_A05_CD8 _2020-06-15,2454.191406,143.191742,922.452332,506.645142,267.586334,959.00116,43.22718,12588.030273,658.494629,1261.494507,41467.25,FALSE,-10.0955345177105,46.3516107851029,"22"
export_AJP SEB_A5_A05_CD8 _2020-06-15,48.832497,61.259953,554.368042,111.905022,555.850159,1035.019165,62.996384,16102.005859,756.353149,266.703674,284.356659,FALSE,-19.6371015963387,-23.769671752424,"2"
export_AJP SEB_A5_A05_CD8 _2020-06-15,1618.851563,188.121216,1319.85083,250.376038,-33.780403,1047.979126,81.623375,8380.375977,194.320908,575.253113,3257.270996,FALSE,-13.5469309515685,-16.477350574617,"16"
export_AJP SEB_A5_A05_CD8 _2020-06-15,-56.807446,159.634308,512.329224,81.840889,162.323151,92.258118,80.691887,8828.052734,244.442886,300.049072,4472.744141,FALSE,-5.5677039886702,4.15210254456187,"6"
export_AJP SEB_A5_A05_CD8 _2020-06-15,13629.728516,99.700989,210.653198,1874.747803,1669.074341,-43.728828,-31.027426,59.500195,559.657349,664.457703,255.28125,FALSE,31.5818851761779,33.0765292141998,"23"
export_AJP SEB_A5_A05_CD8 _2020-06-15,362.883423,218.018997,988.720947,134.732101,450.831635,1027.466187,149.71933,466.506592,842.038025,563.117004,360.425507,FALSE,-5.00992867808102,-27.2236682784551,"16"
export_AJP SEB_A5_A05_CD8 _2020-06-15,661.389282,299.646729,3127.222168,328.227631,1124.36145,245.396912,38.915031,4660.347168,502.034851,3199.556396,357.23407,FALSE,1.54949217815336,-13.5705604502608,"6"
export_AJP SEB_A5_A05_CD8 _2020-06-15,3400.618652,133.941788,130.610825,132.565353,109.284943,90.042381,51.231125,2131.717773,-12.654123,138.411987,864.806763,FALSE,18.8514655520816,12.8503932973376,"15"
export_AJP SEB_A5_A05_CD8 _2020-06-15,1724.085938,97.057442,366.590881,271.7901,763.666565,116.995285,-78.676071,10987.357422,8904.211914,-83.182243,758.580872,FALSE,-25.9453309911483,9.16228497139425,"4"
export_AJP SEB_A5_A05_CD8 _2020-06-15,13035.295898,218.33609,431.467896,-296.402069,3204.758057,90.211403,-1071.651245,518.198914,266.571442,61777.628906,-900.39563,FALSE,26.9340046753248,-20.0606129906304,"12"
export_AJP SEB_A5_A05_CD8 _2020-06-15,9080.856445,105.135338,229.485992,540.244629,1054.817993,69.366646,13.865716,609.411011,149.262207,998.656982,871.18811,FALSE,30.3340506959139,29.4454136319639,"23"
export_AJP SEB_A5_A05_CD8 _2020-06-15,450.755219,115.47654,8260.458984,414.480988,1342.674561,5123.685059,-304.895752,27797.583984,7260.773926,431.708466,2311.064453,FALSE,-31.7148795670401,-38.5542949745524,"24"
export_AJP SEB_A5_A05_CD8 _2020-06-15,1038.850952,146.703293,966.834045,922.394653,1123.324463,302.965942,190.465881,16453.601563,5512.77832,212.595901,406.900116,FALSE,-20.5165185074548,-5.38023279227659,"6"
export_AJP SEB_A5_A05_CD8 _2020-06-15,200.028152,147.446869,327.309753,224.995148,737.388672,783.736816,147.917664,3715.301025,1588.783569,260.864441,300.735443,FALSE,-3.29395035549547,-25.9525701190561,"16"
export_AJP SEB_A5_A05_CD8 _2020-06-15,290.391571,106.740013,361.852631,147.720901,6.379211,221.285812,-40.359135,2542.941162,229.040329,924.199951,45.943718,FALSE,0.780616933095055,-13.2540747185687,"25"
export_AJP SEB_A5_A05_CD8 _2020-06-15,863.946533,129.324768,613.014282,227.45845,227.28334,158.489899,-16.857706,2421.045898,131.008347,246.853165,6043.187012,FALSE,3.25156049828728,20.5638601786912,"14"
export_AJP SEB_A5_A05_CD8 _2020-06-15,277.830841,134.019211,556.616394,446.130951,199.423203,124.548393,-25.105244,2151.284668,866.95697,256.602997,151.056122,FALSE,3.96817069492043,-9.72761587906201,"9"
export_AJP SEB_A5_A05_CD8 _2020-06-15,2117.646729,314.645996,341.564362,201.617508,295.020569,445.207947,-66.564606,714.189575,1034.749634,838.333496,172.182922,FALSE,14.3850736107699,5.5334312260575,"15"
export_AJP SEB_A5_A05_CD8 _2020-06-15,707.996887,86.504555,1654.528687,364.413696,2380.744385,2065.223633,346.761139,6815.366211,1066.304932,1218.5271,9019.616211,FALSE,-21.6761426349813,-36.1197509528025,"24"
export_AJP SEB_A5_A05_CD8 _2020-06-15,301.091125,132.117477,1821.799561,340.359894,445.866852,4124.112793,61.155247,18677.837891,942.660522,1401.805542,150.859299,FALSE,-28.8136356065004,-37.6854751202351,"24"
export_AJP SEB_A5_A05_CD8 _2020-06-15,124.087364,45.296078,303.198486,63.453117,103.466789,563.238647,100.493797,222.194183,94.027687,311.174866,921.29425,FALSE,-1.49100863588741,-18.5531426492001,"16"
export_AJP SEB_A5_A05_CD8 _2020-06-15,241.454544,191.635742,363.358063,542.010315,1476.888672,179.252136,256.997009,5250.886719,123.904312,990.721375,132.598969,FALSE,5.22470139293164,-13.4904987002537,"11"
export_AJP SEB_A5_A05_CD8 _2020-06-15,286.470612,85.378922,316.584198,1.704474,1653.449097,180.032669,66.777435,2464.835938,580.44989,-84.974998,3149.053711,FALSE,7.2290198136287,-7.7056937738544,"11"
export_AJP SEB_A5_A05_CD8 _2020-06-15,1459.039795,161.546936,242.900635,181.178528,-75.447815,282.211487,-38.162735,1923.367676,68.947411,1056.044678,578.291748,FALSE,9.57196063110202,2.61916901806049,"9"
export_AJP SEB_A5_A05_CD8 _2020-06-15,-140.601944,121.436371,397.017822,210.271835,683.646179,424.157013,-2.210676,-138.810822,117.676346,1985.801025,371.64212,FALSE,4.95964144776923,-22.1359330039485,"11"
export_AJP SEB_A5_A05_CD8 _2020-06-15,7080.425781,171.500504,509.098053,2065.618164,1806.001831,66.939911,44.126175,146.106232,765.525452,657.799866,-161.882263,FALSE,35.6842304122875,23.9803589342163,"23"
export_AJP SEB_A5_A05_CD8 _2020-06-15,693.518921,244.854126,277.255219,186.80426,119.726433,95.301994,22.303469,7770.601563,212.451523,588.301025,6015.810547,FALSE,-0.359008493171208,17.5624035322034,"14"
export_AJP SEB_A5_A05_CD8 _2020-06-15,152.319748,141.031418,2220.410889,142.974152,965.190674,820.903198,-30.575159,4690.694336,198.103745,618.021667,2301.218018,FALSE,-6.18506597396395,-20.9482746569797,"24"
export_AJP SEB_A5_A05_CD8 _2020-06-15,22497.486328,150.520966,345.74231,644.493103,1288.001953,78.0149,27.138147,151.548538,125.057785,1004.260498,373.703949,FALSE,29.762770528738,35.2532733059097,"5"
export_AJP SEB_A5_A05_CD8 _2020-06-15,233.43187,113.744263,205.901367,415.388367,269.385834,602.055847,-122.63839,-85.405457,104.843109,6569.003418,-82.572266,FALSE,9.25393738266632,-29.3921118439123,"25"
export_AJP SEB_A5_A05_CD8 _2020-06-15,367.910004,129.873871,1854.314209,336.236511,2809.653564,1713.451904,-62.729397,21794.148438,733.163696,906.308777,4132.268066,TRUE,-30.7943033717653,-28.7355343343855,"2"
export_AJP SEB_A5_A05_CD8 _2020-06-15,37.404652,87.083855,661.811768,247.094635,454.008362,451.620941,-41.147491,39.758553,266.602722,893.124268,655.239929,FALSE,1.66557281635335,-19.0673751906747,"16"
export_AJP SEB_A5_A05_CD8 _2020-06-15,159.169861,129.632965,1589.435791,325.279846,44.624378,969.936401,-32.739136,30283.511719,320.96286,368.949493,5861.707031,FALSE,-32.7130041542066,-23.4967020342736,"3"
export_AJP SEB_A5_A05_CD8 _2020-06-15,1208.088135,82.538376,445.08493,139.537567,242.992325,498.636353,7.010193,1042.345703,171.112228,319.165466,1262.585938,FALSE,3.98386621051393,-4.27643309823701,"16"
export_AJP SEB_A5_A05_CD8 _2020-06-15,68.265892,192.675369,527.205872,217.276169,822.32312,839.332031,31.534077,7263.941895,400.928497,352.929352,741.886841,FALSE,-5.48539369613424,-26.4951374011981,"16"
export_AJP SEB_A5_A05_CD8 _2020-06-15,284.184082,17.909399,129.348007,57.025417,430.230377,238.489578,74.526291,675.015686,657.105957,480.477997,1212.159668,FALSE,3.64032144855762,-9.83270585079602,"9"
export_AJP SEB_A5_A05_CD8 _2020-06-15,292.555817,140.70256,346.309937,284.474396,826.599548,76.530281,-1.269867,5243.03418,1390.749512,551.854919,170.022934,FALSE,2.24762873103766,-11.9762740229911,"11"
export_AJP SEB_A5_A05_CD8 _2020-06-15,1202.673584,107.022972,482.097687,100.952621,239.296341,307.914368,0.958917,14612.669922,77.912407,216.69838,1013.122803,FALSE,-17.6259825681211,-12.6071721273031,"6"
export_AJP SEB_A5_A05_CD8 _2020-06-15,1542.97583,180.781235,686.421753,611.097656,417.810547,738.659973,48.463604,4634.095703,608.815857,2587.672363,700.838806,FALSE,-0.791227056525835,-17.9474214580845,"16"
export_AJP SEB_A5_A05_CD8 _2020-06-15,250.528122,65.528244,646.236572,307.979736,1077.532593,51.350563,-21.033371,11379.138672,1715.893311,855.96759,7470.730957,FALSE,-7.7822481864483,19.4702190300616,"10"
export_AJP SEB_A5_A05_CD8 _2020-06-15,999.830444,152.182785,319.697906,549.546448,1617.738647,85.240799,42.104458,1237.345215,633.805786,314.500427,90.885345,FALSE,19.8850849584363,-5.00294374154941,"11"
export_AJP SEB_A5_A05_CD8 _2020-06-15,1017.55304,85.449715,883.360657,549.570984,818.543945,426.96756,152.820313,7607.994141,246.954102,610.526733,883.906128,FALSE,-4.74362378962616,-19.0967978805076,"11"
export_AJP SEB_A5_A05_CD8 _2020-06-15,-162.666428,193.115082,374.190552,164.603043,246.752411,1021.817505,158.677292,2295.80835,213.504517,168.388687,3292.001465,FALSE,-8.3696182600289,-26.0073595623052,"16"
export_AJP SEB_A5_A05_CD8 _2020-06-15,966.965942,181.740143,315.211273,229.484909,44.096844,304.192139,17.970371,1735.266113,195.916382,940.046143,176.483093,FALSE,5.36361208496873,-3.94289644273434,"9"
export_AJP SEB_A5_A05_CD8 _2020-06-15,15186.887695,254.862015,491.1474,307.588837,2783.110352,342.605408,-241.496124,375.093719,750.035095,21050.4375,596.990723,FALSE,27.8564316188887,34.2714429235652,"12"
export_AJP SEB_A5_A05_CD8 _2020-06-15,3495.884033,167.000229,272.135498,485.159851,1115.13916,245.047714,-144.706818,650.309937,947.184082,12231.021484,-346.182648,FALSE,24.2002775307219,-4.11703548497036,"12"
export_AJP SEB_A5_A05_CD8 _2020-06-15,3314.113525,187.782959,374.746124,193.494537,-167.650085,153.959991,225.51059,3607.19043,125.429321,1005.048523,0.320977,FALSE,16.5895334876112,12.8357925332712,"15"
export_AJP SEB_A5_A05_CD8 _2020-06-15,2220.4375,135.307587,341.468536,122.993332,2637.960449,580.408569,-54.089279,9509.240234,503.067932,1147.227295,254.640182,FALSE,10.1137498932026,-16.5608182958155,"15"
export_AJP SEB_A5_A05_CD8 _2020-06-15,-200.624344,133.634537,246.408768,342.14743,571.100891,1738.324097,-20.428816,7043.006836,761.928955,440.913544,1839.425781,FALSE,-13.9608758162452,-33.3341437982934,"24"
export_AJP SEB_A5_A05_CD8 _2020-06-15,39.783253,109.547287,938.839417,188.305588,428.24823,4366.728516,487.14151,5236.575684,963.975037,180.805344,1880.090088,FALSE,-21.4379490457693,-37.5979934909532,"24"
export_AJP SEB_A5_A05_CD8 _2020-06-15,15.839336,111.65197,243.184708,82.163734,334.374573,947.147339,92.283012,89.166687,65.306557,121.244308,848.344971,FALSE,-4.39618059592073,-27.1883542814644,"16"
export_AJP SEB_A5_A05_CD8 _2020-06-15,-100.509354,42.064171,188.656357,99.724022,888.520569,784.910461,-0.827127,1958.884766,1210.201782,-53.275173,3741.816162,FALSE,-4.07264139210592,-25.4673857862195,"10"
export_AJP SEB_A5_A05_CD8 _2020-06-15,1335.658691,96.850632,13.261289,131.488388,240.925247,921.081543,8.878572,776.420959,4993.805176,438.804871,14027.412109,FALSE,-10.8177284410895,36.667615806872,"21"
export_AJP SEB_A5_A05_CD8 _2020-06-15,682.50177,92.494667,565.846252,176.175385,2116.041748,762.674622,-428.580048,3554.69873,202.979126,22881.837891,30.323824,FALSE,25.4794789312356,-38.1159741381482,"25"
export_AJP SEB_A5_A05_CD8 _2020-06-15,578.447998,145.080246,482.180115,526.182129,57.589867,-197.398026,-7.272829,588.282532,1395.47168,1843.358276,48657.535156,FALSE,-9.69830987103336,55.3041002853995,"22"
export_AJP SEB_A5_A05_CD8 _2020-06-15,60.342739,168.454178,352.553986,242.137482,779.076111,1558.543823,-200.486435,9771.705078,5969.678711,343.095856,885.762634,FALSE,-27.54244044025,-15.6060530824098,"2"
export_AJP SEB_A5_A05_CD8 _2020-06-15,6034.620605,87.271576,211.859268,226.459244,1882.584229,20.701519,-434.95047,-318.641327,535.168335,21451.458984,134.098206,FALSE,24.8513007667514,-1.09557308620217,"12"
export_AJP SEB_A5_A05_CD8 _2020-06-15,881.056213,133.085831,559.444824,155.524506,355.775635,276.726349,37.837181,158.843613,705.809204,229.305618,236.691772,FALSE,7.65571863983677,-3.73363529688731,"9"
export_AJP SEB_A5_A05_CD8 _2020-06-15,40.077175,27.025532,307.179749,152.470139,705.616882,1222.265503,39.90451,10708.755859,121.027718,986.106445,306.800537,FALSE,-11.8273060331298,-30.2249317643299,"2"
export_AJP SEB_A5_A05_CD8 _2020-06-15,-2.235449,64.957344,332.068726,220.141525,-7.753674,1821.813354,87.497345,2360.39917,40.542641,487.35672,2301.546387,FALSE,-14.6465653649371,-31.3951492168419,"24"
export_AJP SEB_A5_A05_CD8 _2020-06-15,9605.328125,1.804885,176.013351,1419.543701,997.215881,1.818618,14.00806,484.388885,63.416386,6.870607,864.299744,FALSE,31.3830055466307,30.3199124026028,"23"
export_AJP SEB_A5_A05_CD8 _2020-06-15,667.423706,127.880737,383.661926,224.645279,553.916992,1434.809937,-104.530296,197.803192,166.901215,11617.523438,-80.155739,FALSE,1.08298920736542,-36.628433923562,"25"
export_AJP SEB_A5_A05_CD8 _2020-06-15,5122.984375,68.487938,1809.859741,733.190552,813.278137,185.46402,-18.000887,-202.630203,1220.077026,286.409088,201.6147,FALSE,25.3666329329876,17.6794226356133,"18"
export_AJP SEB_A5_A05_CD8 _2020-06-15,402.743866,164.09584,1477.466187,319.165527,1129.927246,2736.363281,656.672974,14033.527344,166.397583,1091.862793,701.911133,FALSE,-17.8573263582637,-32.3345877380337,"24"
export_AJP SEB_A5_A05_CD8 _2020-06-15,67.599922,46.582329,346.134979,116.820885,877.084595,2957.453125,-74.019875,14951.90625,1671.13269,40.709053,256.918488,FALSE,-27.828384613389,-36.5171581524711,"24"
export_AJP SEB_A5_A05_CD8 _2020-06-15,366.946045,172.300461,139.141937,828.54126,2474.119873,1024.352783,71.920486,4018.545654,616.429321,494.569427,169.751801,FALSE,-0.485565427093235,-37.2324457432891,"13"
export_AJP SEB_A5_A05_CD8 _2020-06-15,760.523315,124.366104,335.56073,199.982422,386.960571,341.890564,-98.901054,8757.799805,3148.118652,155.674423,498.768219,FALSE,-13.608848217384,-9.80268405924859,"6"
export_AJP SEB_A5_A05_CD8 _2020-06-15,41.675995,133.076172,456.031403,509.176666,736.332153,210.405396,53.017376,4255.602051,695.771118,138.463654,121.962151,FALSE,1.55551603424288,-16.2616236332609,"11"
export_AJP SEB_A5_A05_CD8 _2020-06-15,424.569153,182.225708,800.733276,403.968353,785.774536,1670.228882,-49.12278,14311.436523,229.997391,1267.001831,411.383667,FALSE,-19.3121694387955,-31.8236070349726,"2"
export_AJP SEB_A5_A05_CD8 _2020-06-15,237.069839,218.869125,258.549438,216.26442,276.720642,155.145935,-17.685202,2082.138672,163.374817,889.676147,80.209839,FALSE,3.40246329050878,-14.4713408893923,"25"
export_AJP SEB_A5_A05_CD8 _2020-06-15,128.616455,184.618378,767.675354,268.688843,864.268066,802.94458,87.113892,2407.676514,245.39772,978.341248,22503.197266,FALSE,-7.32119436880646,47.2411319074052,"22"
export_AJP SEB_A5_A05_CD8 _2020-06-15,48.830151,54.170601,472.7789,1480.680298,1637.478027,129.809341,-9.300123,506.756439,1179.483521,4.770043,235.188614,FALSE,19.2576786288531,-12.2800720976442,"11"
export_AJP SEB_A5_A05_CD8 _2020-06-15,543.358154,158.464264,5753.416016,756.231689,1672.102905,1326.5979,173.224594,5610.458008,771.690308,846.462708,479.712799,FALSE,-13.6333797256837,-26.1544581438977,"24"
export_AJP SEB_A5_A05_CD8 _2020-06-15,1185.301147,178.246216,963.710327,588.333862,568.333557,1420.270874,194.176132,226.724045,9642.198242,470.0495,14174.493164,FALSE,-29.8321621483178,14.1145147677527,"7"
export_AJP SEB_A5_A05_CD8 _2020-06-15,322.327118,85.840897,319.436523,279.044067,347.819489,497.733215,6.975525,13164.609375,216.215317,131.038376,2345.662109,FALSE,-16.1965754591167,-16.3679614958562,"6"
export_AJP SEB_A5_A05_CD8 _2020-06-15,415.877014,110.979454,200.351028,96.95845,448.702057,940.106201,3.678975,-106.700447,228.431717,201.086243,919.976685,FALSE,-4.40618621721686,-26.7615158668783,"16"
export_AJP SEB_A5_A05_CD8 _2020-06-15,24.584679,149.542358,466.736176,27.063005,1449.846069,2660.44458,78.362457,29739.759766,750.08136,125.447906,603.8703,FALSE,-27.9544441296435,-30.5349127335794,"2"
export_AJP SEB_A5_A05_CD8 _2020-06-15,253.705597,131.87912,263.217163,161.577255,429.759003,639.039429,-16.204599,707.577332,130.803833,262.388184,743.122681,FALSE,-1.4350433045578,-21.6588243837332,"16"
export_AJP SEB_A5_A05_CD8 _2020-06-15,400.400177,393.887665,557.154541,792.514709,1024.340698,540.560669,1.408134,921.696716,272.106323,1055.950317,1191.459229,FALSE,3.09970552924537,-23.1935197351454,"11"
export_AJP SEB_A5_A05_CD8 _2020-06-15,981.893066,98.640274,319.285339,117.172852,20.895887,29.806728,131.702805,-141.967911,623.524414,325.389679,-41.06105,FALSE,8.06670870147212,-1.42958323102758,"9"
export_AJP SEB_A5_A05_CD8 _2020-06-15,513.996765,116.315529,440.279236,230.488235,983.089966,1027.147095,13.195561,-21.631395,164.027603,496.087341,736.01355,FALSE,-4.00639423788695,-29.5061331972756,"16"
export_AJP SEB_A5_A05_CD8 _2020-06-15,915.800049,100.066452,454.607849,127.975822,300.633667,235.726669,33.389889,5127.11084,632.345215,552.555359,7095.850098,FALSE,1.39089686568105,24.5069137454321,"14"
export_AJP SEB_A5_A05_CD8 _2020-06-15,6034.564453,95.786018,1334.636108,1358.212158,3606.337646,295.724213,-4.229019,234.781219,402.747131,1486.716187,232.54567,FALSE,38.95790751118,23.6319900996065,"30"
export_AJP SEB_A5_A05_CD8 _2020-06-15,535.096436,137.706757,1785.042847,195.109024,527.455688,576.089722,13.445268,957.597839,641.55481,837.572083,156.254517,FALSE,-0.5604971116668,-16.418906470186,"16"
export_AJP SEB_A5_A05_CD8 _2020-06-15,259.468903,173.959641,688.894653,170.938705,132.08876,1682.567139,207.941589,11487.081055,4763.244141,449.181915,6046.874023,FALSE,-30.5702111189704,-12.9857506154719,"2"
export_AJP SEB_A5_A05_CD8 _2020-06-15,171.649597,52.607639,136.228119,110.739601,1012.238342,1721.67981,-44.075867,6094.300293,1836.614258,541.237854,214.775497,FALSE,-13.9988847293415,-34.3675132500283,"24"
export_AJP SEB_A5_A05_CD8 _2020-06-15,-8.971245,42.03669,121.157959,155.280457,641.074768,985.43158,4.054599,3516.418213,2243.023193,69.470108,690.327209,FALSE,-5.48875601353429,-27.7421762663865,"16"
export_AJP SEB_A5_A05_CD8 _2020-06-15,625.136292,136.495529,137.893356,107.11895,332.904846,16.840782,83.207771,3851.677979,1864.616455,-177.402283,34.282745,FALSE,2.31555341436274,-1.96516249183152,"6"
export_AJP SEB_A5_A05_CD8 _2020-06-15,412.096252,110.233627,867.355774,1203.424316,451.717926,325.916962,-10.800371,12599.680664,987.781555,485.704315,249.901367,FALSE,-11.8765243295905,-14.4421136786258,"11"
export_AJP SEB_A5_A05_CD8 _2020-06-15,289.410095,157.838058,452.902435,179.741943,178.228348,574.713623,28.46336,9005.071289,-20.497513,-78.069237,3514.189697,FALSE,-12.0990852647205,-16.4003138047211,"16"
export_AJP SEB_A5_A05_CD8 _2020-06-15,100.259041,84.601227,852.581238,240.135422,390.094269,1549.957397,-16.512583,14767.044922,1376.405518,448.365906,23.112715,FALSE,-20.9508852659304,-28.066649062992,"2"
export_AJP SEB_A5_A05_CD8 _2020-06-15,1528.741333,299.828156,1398.204346,602.586975,1178.202148,329.605225,-94.821579,5421.599121,1534.766968,362.713501,85.274857,FALSE,10.588167191005,0.968431630830062,"11"
export_AJP SEB_A5_A05_CD8 _2020-06-15,960.647156,152.999924,2190.78833,324.004456,876.769104,2685.766846,275.181152,20836.734375,2791.619141,635.731018,4151.409668,FALSE,-27.0784262325268,-33.7508986764923,"24"
export_AJP SEB_A5_A05_CD8 _2020-06-15,8294.526367,88.073402,131.375931,1182.674927,1275.853882,-35.097622,-9.234589,-32.871471,691.535278,-51.95084,208.964951,FALSE,32.4369930559518,27.3513139846669,"23"
export_AJP SEB_A5_A05_CD8 _2020-06-15,631.950806,117.102768,121.32679,175.749023,353.101044,95.44931,-175.205566,-176.348541,3537.040283,621.937378,-155.057617,FALSE,-0.953197805427913,-2.53348267459224,"8"
export_AJP SEB_A5_A05_CD8 _2020-06-15,-323.263062,33.594002,344.335205,167.09761,360.711273,848.743103,64.033691,1714.032715,399.461853,1138.917358,35628.765625,FALSE,-8.80395008314963,53.2835896937533,"22"
export_AJP SEB_A5_A05_CD8 _2020-06-15,1442.327393,141.932861,1795.70166,531.904846,700.065369,563.887207,10.234626,644.09729,1004.42395,1524.134033,11517.821289,FALSE,-3.31166903544901,32.7802108916111,"14"
export_AJP SEB_A5_A05_CD8 _2020-06-15,1525.672729,201.700958,1051.037598,624.775452,302.735809,443.564392,307.93045,3877.892334,448.369202,537.25708,6068.111816,FALSE,0.286589140962731,12.576368565867,"14"
export_AJP SEB_A5_A05_CD8 _2020-06-15,-126.773888,134.077133,393.445465,87.968811,628.030518,837.69458,90.769966,1677.657349,1150.110474,335.864502,3041.068115,FALSE,-5.09250933122452,-26.7471938135919,"16"
export_AJP SEB_A5_A05_CD8 _2020-06-15,233.673553,60.561344,239.069611,49.692104,928.61084,1164.459473,0.081181,454.585571,310.856323,214.181564,816.525696,FALSE,-6.64624123013618,-30.7968451301355,"16"
export_AJP SEB_A5_A05_CD8 _2020-06-15,466.268494,124.416679,618.158142,188.382828,326.035522,1898.908325,-45.814316,11743.205078,251.371033,2939.187744,221.303925,FALSE,-18.1091274855854,-34.269360664419,"2"
export_AJP SEB_A5_A05_CD8 _2020-06-15,-106.898201,104.50602,505.902588,263.607971,1095.914551,1389.42334,-9.52882,16237.044922,2992.727051,160.097931,372.604553,FALSE,-22.3936551438174,-26.5221094521101,"2"
export_AJP SEB_A5_A05_CD8 _2020-06-15,-139.713898,64.946609,23.819542,95.282066,113.579994,806.282715,-85.988335,3314.099854,11074.447266,339.014648,9114.063477,FALSE,-28.5724301862606,17.1971433171496,"20"
export_AJP SEB_A5_A05_CD8 _2020-06-15,7747.114746,166.698563,628.497314,417.15741,1482.553467,438.467896,-77.342926,324.09613,607.835815,4294.966309,184.709,FALSE,31.0320324144422,25.7555827387865,"23"
export_AJP SEB_A5_A05_CD8 _2020-06-15,1682.139404,100.0588,442.361725,102.969856,197.068527,570.555786,-9.544589,1383.178467,131.337219,247.006302,6507.391602,FALSE,4.83652656989641,19.6134906394751,"14"
export_AJP SEB_A5_A05_CD8 _2020-06-15,13985.760742,105.407059,1004.464478,334.166626,2725.965332,114.557327,28.390848,363.827789,97.856468,1008.11969,508.158783,FALSE,33.342082689359,33.5600796235872,"23"
export_AJP SEB_A5_A05_CD8 _2020-06-15,381.242035,45.033829,1674.220825,258.144196,423.566376,1410.78479,104.483383,10462.321289,1229.588989,122.524826,243.177368,FALSE,-14.5278464705862,-26.4954050998098,"24"
export_AJP SEB_A5_A05_CD8 _2020-06-15,1143.444702,19.264635,1312.424194,508.676758,217.925674,238.78038,-99.761208,3782.06665,612.258911,375.074524,9137.352539,FALSE,-0.919886383342542,29.6229416913267,"14"
export_AJP SEB_A5_A05_CD8 _2020-06-15,659.582947,82.530205,491.02594,361.252686,2159.219727,1907.283203,-208.172791,11727.960938,58.294254,11279.074219,-157.269058,FALSE,-7.99533195413644,-40.7476331711325,"25"
export_AJP SEB_A5_A05_CD8 _2020-06-15,9400.493164,236.438049,202.371155,200.480515,254.629135,2149.74292,-54.885136,1808.965088,10543.642578,262.621613,3923.749268,FALSE,15.8026849294662,24.806140047676,"4"
export_AJP SEB_A5_A05_CD8 _2020-06-15,415.428162,154.690872,827.111389,403.360413,511.508148,1694.627319,-115.322235,4739.430664,317.686584,560.605164,6144.191895,FALSE,-15.1138667004007,-27.7362929344443,"24"
export_AJP SEB_A5_A05_CD8 _2020-06-15,835.270935,194.244263,1287.572998,283.159393,610.302063,1001.64917,-42.480339,7615.619141,339.609589,3033.572754,-59.258614,FALSE,-5.79803756886256,-25.0334813694914,"25"
export_AJP SEB_A5_A05_CD8 _2020-06-15,289.256531,117.362541,727.974915,96.299004,944.167603,1070.133789,-26.07766,2251.692139,130.335632,10257.713867,216.861511,FALSE,5.77077893770036,-36.9506430371775,"25"
export_AJP SEB_A5_A05_CD8 _2020-06-15,524.725586,117.881462,817.276184,136.359375,-146.700287,611.140381,51.943768,752.482056,4.0683,901.151428,226.533188,FALSE,-2.70526883541092,-17.3213483781082,"16"
export_AJP SEB_A5_A05_CD8 _2020-06-15,3813.700684,62.308357,844.004333,892.203125,2123.428467,482.974792,685.973145,18156.28125,555.050049,621.296082,111.241882,FALSE,-0.393385652959268,7.82288461664166,"6"
export_AJP SEB_A5_A05_CD8 _2020-06-15,169.618881,59.254429,316.085449,128.918549,1335.717407,1083.083618,12.065101,8363.526367,556.732788,447.711365,279.749695,FALSE,-6.99057564521257,-31.9191901264237,"13"
export_AJP SEB_A5_A05_CD8 _2020-06-15,5179.465332,128.322479,174.386841,1925.28894,1219.326538,42.385983,22.747265,7191.053223,22.552034,277.21106,1259.325684,FALSE,28.4019103958213,19.4838234607871,"18"
export_AJP SEB_A5_A05_CD8 _2020-06-15,61.748451,85.689056,536.382141,430.742249,351.643372,379.284515,-0.759497,20433.462891,-65.626701,1356.453613,1014.544434,FALSE,-23.5799290392631,-19.0627859616428,"2"
export_AJP SEB_A5_A05_CD8 _2020-06-15,729.679504,227.514328,375.960236,210.549484,684.72998,254.818741,45.083366,104.627747,57.138348,521.362793,1074.255005,FALSE,9.44668525743737,-5.64448522239392,"9"
export_AJP SEB_A5_A05_CD8 _2020-06-15,28297.050781,166.447113,-944.86853,115.242073,322.029053,127.711258,-1295.074829,20152.927734,27422.863281,119.824371,149.92569,FALSE,40.0248794981855,50.8280261153858,"5"
export_AJP SEB_A5_A05_CD8 _2020-06-15,1094.406372,174.381622,992.156494,307.232544,825.807434,1604.50769,-78.571075,5416.114746,436.579163,3200.663086,233.280136,TRUE,-18.5367865754022,-36.6109072897338,"24"
export_AJP SEB_A5_A05_CD8 _2020-06-15,539.765381,63.232883,972.552612,-75.813744,677.460876,-404.088654,-104.280472,4207.687012,983.629639,11356.384766,51153.566406,FALSE,-8.77287242556459,54.2191317742287,"22"
export_AJP SEB_A5_A05_CD8 _2020-06-15,11075.270508,43.496365,307.265686,508.205231,831.511658,71.446808,57.82399,143.662354,665.858826,388.311218,300.778992,FALSE,31.6877782664291,33.4433041421333,"23"
export_AJP SEB_A5_A05_CD8 _2020-06-15,254.536743,15.26185,324.44281,106.095909,529.500366,1180.113403,178.867462,140.501007,47.962387,307.995392,1095.859009,FALSE,-8.14630757051247,-30.432715908281,"16"
export_AJP SEB_A5_A05_CD8 _2020-06-15,210.103745,153.547409,346.52417,115.339668,634.509216,986.085754,-21.689327,445.29071,196.077179,1076.213013,436.313293,FALSE,-3.45459198164758,-27.9785787013801,"16"
export_AJP SEB_A5_A05_CD8 _2020-06-15,1018.819397,72.902794,1772.358398,237.362473,1352.483887,2517.571777,64.265053,8052.881348,1812.119629,752.260315,3050.083252,FALSE,-22.7643817019223,-36.536687261461,"24"
export_AJP SEB_A5_A05_CD8 _2020-06-15,4635.060547,137.518814,1359.072754,236.770721,540.163452,737.293152,-19.723974,5480.247559,7095.935059,345.014526,830.321594,FALSE,1.92125875178994,21.8591739957863,"4"
export_AJP SEB_A5_A05_CD8 _2020-06-15,325.711945,183.120667,1093.195557,947.447998,1044.957275,705.685608,32.508591,13625.126953,1223.109009,520.681335,4336.592285,FALSE,-15.1468894932824,-20.5651898872394,"10"
export_AJP SEB_A5_A05_CD8 _2020-06-15,565.249756,63.846695,208.657013,306.37262,1091.315063,190.588562,202.41301,2239.170898,1154.948364,395.562164,78.710022,FALSE,7.36026569879349,-8.70954485007773,"11"
export_AJP SEB_A5_A05_CD8 _2020-06-15,639.963379,141.936981,280.696167,149.72229,863.447754,180.761444,56.707096,-296.797485,638.361145,440.213013,378.906555,FALSE,9.88605803611663,-6.99926435994667,"11"
export_AJP SEB_A5_A05_CD8 _2020-06-15,4027.69165,105.71656,539.790527,183.031265,1346.858276,496.828674,39.23436,7875.924805,1481.842041,57.455181,371.051666,FALSE,23.7317976387733,18.3675218886838,"15"
export_AJP SEB_A5_A05_CD8 _2020-06-15,50.30328,213.427032,1696.815918,861.398438,1079.226074,444.958618,93.612106,331.202881,1175.144165,1261.560913,12060.509766,TRUE,-3.98007300875465,32.2977250436537,"14"
export_AJP SEB_A5_A05_CD8 _2020-06-15,9347.818359,106.306511,631.31311,210.150284,1021.812439,16.79917,-51.903553,94.446724,465.127808,4764.234863,234.534714,FALSE,30.2483867161012,30.366606007405,"23"
export_AJP SEB_A5_A05_CD8 _2020-06-15,209.850616,123.225243,1373.950073,332.677551,846.252625,229.930588,0.940031,5177.349609,548.425171,1179.079956,13563.742188,FALSE,-3.9433396740253,37.7221576215305,"10"
export_AJP SEB_A5_A05_CD8 _2020-06-15,360.529877,134.734787,417.743774,158.571487,306.804443,309.231018,51.218014,4017.55957,65.165375,81.524544,756.675537,FALSE,-2.6609203741315,-14.5653584795754,"16"
export_AJP SEB_A5_A05_CD8 _2020-06-15,304.049072,83.237694,-45.987129,671.423035,920.660522,126.651787,-161.731384,8.689997,2648.206055,-77.593658,112.467834,FALSE,7.13864762570056,-8.2919611082514,"11"
export_AJP SEB_A5_A05_CD8 _2020-06-15,321.76712,94.811264,1995.990479,263.415527,57.127232,1190.867676,152.103409,4843.039063,2553.111816,179.106125,2663.442627,FALSE,-11.4115326766916,-21.8941792148911,"24"
export_AJP SEB_A5_A05_CD8 _2020-06-15,-20.265232,154.174774,228.553009,1048.82019,1344.835083,93.951271,82.417366,4479.281738,620.761292,109.068375,49.598953,FALSE,12.0345720137241,-15.3804454843196,"11"
export_AJP SEB_A5_A05_CD8 _2020-06-15,404.288177,129.306168,956.754578,363.197784,298.829163,1942.552734,1763.115479,2825.320557,257.770569,936.956177,673.232239,FALSE,-9.93876659051069,-13.2801047156131,"28"
export_AJP SEB_A5_A05_CD8 _2020-06-15,698.970398,11.878037,-681.298767,76.354034,207.208694,201.67012,-938.769714,-57.878883,18020.59375,-269.490265,6507.109375,FALSE,-41.6429290896947,31.4856431071349,"20"
export_AJP SEB_A5_A05_CD8 _2020-06-15,1289.53833,68.453392,458.086365,46.192162,438.066223,276.428345,62.124977,464.000763,167.222916,3989.344727,321.588989,FALSE,9.28350166786203,-7.8868766974725,"25"
export_AJP SEB_A5_A05_CD8 _2020-06-15,1020.48645,158.798889,326.477173,459.51886,238.841782,199.627747,8.703973,12071.493164,124.020744,346.66922,1358.223877,FALSE,-14.0794691663296,-11.8184867564444,"6"
export_AJP SEB_A5_A05_CD8 _2020-06-15,2494.167236,105.681793,315.085175,301.72699,1003.651611,150.850128,109.026962,1950.862793,744.378662,191.707993,254.260605,FALSE,21.0337058104962,8.64742933284989,"18"
export_AJP SEB_A5_A05_CD8 _2020-06-15,148.284103,147.410904,506.265717,858.11438,300.748718,263.235199,-289.489105,188.860092,2383.791748,429.573944,456.914459,FALSE,3.14697933979222,-6.73992541655111,"8"
export_AJP SEB_A5_A05_CD8 _2020-06-15,20377.863281,186.367905,231.006561,1349.861938,2312.813721,-15.731809,-51.531227,89.419518,408.08374,1180.496826,296.970337,FALSE,31.0469906977214,34.3128380489893,"5"
export_AJP SEB_A5_A05_CD8 _2020-06-15,319.250702,93.994591,537.483948,362.755646,708.75647,1843.086792,-65.038246,5657.27832,1288.987427,487.511749,199.199982,FALSE,-14.645500011607,-33.729789174401,"24"
export_AJP SEB_A5_A05_CD8 _2020-06-15,9317.510742,47.76265,111.803688,1467.588013,1311.38501,81.883148,-154.370255,107.071648,617.983398,185.62764,107.783127,TRUE,30.1848993334191,30.1422986011034,"23"
export_AJP SEB_A5_A05_CD8 _2020-06-15,655.911987,211.340256,295.520996,78.475616,54.5219,619.351074,-36.425934,6260.693848,1192.917114,357.905243,30.959219,FALSE,-6.78697475685275,-16.7024809835918,"16"
export_AJP SEB_A5_A05_CD8 _2020-06-15,669.922058,127.092407,1604.949707,83.431984,2644.737793,2712.981934,-227.481049,11042.888672,3093.307617,483.39386,1121.34375,FALSE,-24.4274914107535,-37.1135919560894,"24"
export_AJP SEB_A5_A05_CD8 _2020-06-15,27036.054688,261.392792,529.084045,1134.478516,2954.882813,245.95726,18.310406,-129.540161,235.700912,997.966248,354.124298,FALSE,30.0814747531909,35.4867091540823,"5"
export_AJP SEB_A5_A05_CD8 _2020-06-15,4326.397461,89.577026,276.317169,2225.83374,1503.75708,772.160522,50.435497,3660.425781,63.719116,313.853699,831.310059,FALSE,29.9778352036038,15.4860625163172,"15"
export_AJP SEB_A5_A05_CD8 _2020-06-15,464.060852,57.89119,-1192.453003,184.659683,259.349854,1604.543335,-1027.821167,5335.528809,34364.28125,299.12085,13321.466797,FALSE,-39.7394735681154,34.3585518822512,"20"
export_AJP SEB_A5_A05_CD8 _2020-06-15,14183.892578,221.543976,374.660889,546.456665,1529.818726,171.612473,41.422714,148.818176,315.030792,885.207825,779.905273,FALSE,30.5605666924821,33.1124381787858,"23"
export_AJP SEB_A5_A05_CD8 _2020-06-15,1834.058105,139.430389,-158.226456,107.210777,76.250954,1195.759888,264.273254,4381.477539,13350.795898,60.233082,4369.479004,FALSE,-42.1840370716719,10.0961595490493,"7"
export_AJP SEB_A5_A05_CD8 _2020-06-15,843.460266,198.525085,925.41272,3354.221436,2018.232178,464.911591,100.039192,31947.349609,1590.185547,460.753052,199.079834,FALSE,-35.027374805152,-21.1964749811641,"2"
export_AJP SEB_A5_A05_CD8 _2020-06-15,241.992615,60.324921,-642.222107,185.326706,203.399307,1045.250854,-331.4104,587.665405,18022.763672,35.601997,14256.101563,FALSE,-31.9148137048485,26.2335505636625,"7"
export_AJP SEB_A5_A05_CD8 _2020-06-15,422.164948,144.027359,829.159973,170.870346,2654.467285,1907.783813,92.035233,4311.719727,1089.440552,76.948776,406.720367,FALSE,-17.9241276893395,-39.7470005015897,"13"
export_AJP SEB_A5_A05_CD8 _2020-06-15,638.509338,18.718782,597.836365,129.318115,511.470917,400.149689,380.459747,491.871765,96.787636,472.407532,3939.942871,FALSE,-0.934730408418329,-1.04334295443762,"9"
export_AJP SEB_A5_A05_CD8 _2020-06-15,2542.94165,237.145279,949.041931,260.136444,642.256897,1804.826172,266.666229,10830.90918,171.515961,2069.854492,58440.789063,FALSE,-10.8140113323767,52.9677118524963,"22"
export_AJP SEB_A5_A05_CD8 _2020-06-15,464.206787,199.208969,281.499207,341.514099,1366.931885,576.546631,329.253357,6691.274902,768.439636,393.476471,41.63187,FALSE,-1.98433779491309,-21.1571775698266,"16"
export_AJP SEB_A5_A05_CD8 _2020-06-15,1955.590088,258.591522,3600.14624,808.0755,2034.346558,2206.483154,130.845383,1457.24939,3190.376709,1318.744019,139.040329,FALSE,-16.8649361973162,-38.7115517031427,"24"
export_AJP SEB_A5_A05_CD8 _2020-06-15,10424.083008,53.836708,185.891617,2700.751221,1857.048462,2.791684,84.787926,-6.902588,55.634212,965.247253,202.179565,FALSE,33.0108700788164,30.0013887197909,"23"
export_AJP SEB_A5_A05_CD8 _2020-06-15,675.424072,166.683105,321.559479,163.446732,615.450256,453.925568,74.997459,10624.423828,2024.517578,153.175766,76.095619,FALSE,-10.8166775748919,-16.2485659496113,"11"
export_AJP SEB_A5_A05_CD8 _2020-06-15,261.195007,112.219505,454.417145,222.039658,279.089874,772.555359,-11.185581,555.993713,611.264404,59.353142,1071.223999,FALSE,-2.92573579388249,-23.0749453927901,"16"
export_AJP SEB_A5_A05_CD8 _2020-06-15,13189.601563,186.930908,397.165741,365.647156,2063.446777,29.584471,37.463619,737.896423,75.863686,1687.877808,348.074829,FALSE,32.1860510222486,33.1819030809805,"23"
export_AJP SEB_A5_A05_CD8 _2020-06-15,1385.334595,145.901947,-483.791595,216.217667,150.13588,-109.055527,124.268417,-78.045609,14385.65918,761.129333,33627.328125,FALSE,-16.3593368860521,52.1359200969771,"22"
export_AJP SEB_A5_A05_CD8 _2020-06-15,359.628754,124.878014,332.423218,410.723022,174.884186,2228.605225,63.501194,4115.076172,874.385315,444.438812,790.338318,FALSE,-18.0527669779014,-34.3436054039126,"24"
export_AJP SEB_A5_A05_CD8 _2020-06-15,44.723797,94.290894,218.386276,165.634064,346.036285,615.741211,19.782854,262.488739,83.291168,642.009705,929.52832,FALSE,-0.405451264985236,-22.3594743026369,"16"
export_AJP SEB_A5_A05_CD8 _2020-06-15,133.910797,148.692352,292.577026,101.01976,110.999939,1474.575317,-0.694498,-0.724816,142.099335,422.159546,736.316711,TRUE,-15.7986565518415,-38.2665724335521,"24"
export_AJP SEB_A5_A05_CD8 _2020-06-15,260.835236,263.039185,1586.033081,413.162628,520.834534,767.090942,81.025047,1755.827271,826.233826,968.380005,1664.895508,TRUE,-4.42279572975832,-25.642777878296,"16"
export_AJP SEB_A5_A05_CD8 _2020-06-15,-11.886027,138.550491,320.379578,248.806122,264.014862,160.976822,43.092224,3852.789795,1193.690552,155.989151,112.63369,TRUE,-3.46628298835531,-9.9301570914724,"6"
export_AJP SEB_A5_A05_CD8 _2020-06-15,330.470612,217.074936,287.069885,195.34137,422.813843,348.500031,-43.923805,343.71991,158.021851,6687.082031,4064.775879,FALSE,9.13421414378651,-18.7279903583165,"10"
export_AJP SEB_A5_A05_CD8 _2020-06-15,141.702087,118.137749,244.001953,77.756035,72.511299,688.716614,32.218647,5704.811523,21.368931,425.914795,9687.223633,FALSE,-9.68587434100266,14.4983787504637,"14"
export_AJP SEB_A5_A05_CD8 _2020-06-15,118.206108,151.722092,387.804688,232.588287,423.947327,529.98407,-129.609818,11775.803711,691.478516,622.636047,1178.047119,FALSE,-14.7920938873958,-16.2335441787477,"16"
export_AJP SEB_A5_A05_CD8 _2020-06-15,6652.500488,164.304779,440.650177,194.396713,1301.61377,33.052391,18.25606,-11.639042,145.823151,3069.478027,326.86203,FALSE,30.5151141085713,22.524683790248,"18"
export_AJP SEB_A5_A05_CD8 _2020-06-15,7958.40625,76.567131,75.208565,1127.445801,1225.140137,-24.084284,-11.886433,103.937202,1390.094482,128.236542,278.182648,FALSE,32.1024103428437,26.9771336774632,"23"
export_AJP SEB_A5_A05_CD8 _2020-06-15,4176.283691,159.369904,1197.548462,1403.279419,1024.552002,333.880859,440.778687,19892.685547,1390.445557,811.684753,439.733154,FALSE,7.10419275123637,15.989393153116,"6"
export_AJP SEB_A5_A05_CD8 _2020-06-15,16844.902344,189.560486,259.969666,7674.371094,1458.791992,16.186087,49.119461,87.758202,510.972412,887.762634,106.539528,FALSE,29.6701313604116,31.8081020074012,"23"
export_AJP SEB_A5_A05_CD8 _2020-06-15,3393.371582,35.532352,698.671692,245.446381,154.93457,276.294769,67.687454,529.654785,143.219604,2329.028564,61896.875,FALSE,-11.2331370928759,57.7671990246905,"22"
export_AJP SEB_A5_A05_CD8 _2020-06-15,85.739326,111.063477,350.509308,225.853073,67.304237,177.037842,15.339072,12.147926,21.789959,528.847717,1276.652466,FALSE,3.01117629060986,-6.93399790424848,"9"
export_AJP SEB_A5_A05_CD8 _2020-06-15,2251.823975,109.564293,243.808075,195.07283,-37.475266,89.898903,29.932154,1675.092773,115.956566,1158.268433,113.034325,FALSE,15.8973383229235,7.70464416076013,"9"
export_AJP SEB_A5_A05_CD8 _2020-06-15,2073.53125,291.52182,381.815308,1917.881958,1810.30542,567.090515,3.263742,34496.617188,752.641052,544.31488,310.664032,FALSE,-33.912181282508,-20.6795443750014,"3"
export_AJP SEB_A5_A05_CD8 _2020-06-15,190.442139,106.378059,168.95874,143.636719,148.057877,1039.338501,-88.190147,5776.089355,647.121033,445.573853,154.530396,FALSE,-7.82755089556526,-24.2582456810777,"16"
export_AJP SEB_A5_A05_CD8 _2020-06-15,8240.167969,115.964088,257.014679,619.427002,1859.423096,116.965309,162.381271,423.428619,433.510773,2903.92749,5721.672852,FALSE,30.5904202806938,25.766853076701,"5"
export_AJP SEB_A5_A05_CD8 _2020-06-15,98.699669,112.69735,489.355713,135.079636,223.074066,565.938293,132.790833,-31.609509,581.046631,91.166992,233.485672,FALSE,-0.159304960544671,-17.8638436125702,"16"
export_AJP SEB_A5_A05_CD8 _2020-06-15,956.272583,109.891136,2782.338867,239.144119,2195.351318,2976.663574,7.104913,13789.244141,7263.442871,398.611481,1185.415649,FALSE,-26.299500091694,-35.5294732960519,"24"
export_AJP SEB_A5_A05_CD8 _2020-06-15,3610.89624,155.006714,2159.310791,420.34906,1508.255737,164.760513,772.835999,3503.505371,151.982147,882.928345,339.178558,FALSE,11.9599878537984,11.5240189181084,"28"
export_AJP SEB_A5_A05_CD8 _2020-06-15,11096.685547,17.172064,209.044373,718.487122,1976.674316,-42.006218,-85.185699,-26.327885,562.353577,1029.60791,-136.699921,FALSE,33.3425193351241,32.6557516099111,"23"
export_AJP SEB_A5_A05_CD8 _2020-06-15,403.141266,157.448303,278.418854,123.788948,386.788055,467.219604,21.728878,276.197479,47.975235,569.610962,757.238525,FALSE,0.560922764373696,-18.1977823997216,"16"
export_AJP SEB_A5_A05_CD8 _2020-06-15,3513.85376,152.196655,640.654175,119.4758,836.773621,375.586456,-4.187974,11030.466797,1447.912964,85.201653,238.679596,FALSE,18.1693299820984,17.3186253853974,"15"
export_AJP SEB_A5_A05_CD8 _2020-06-15,605.460693,68.583847,498.689148,254.421509,167.397278,123.79715,62.901237,5473.46875,163.57019,1189.059204,398.768799,FALSE,-2.05053790352353,-10.9243229548304,"6"
export_AJP SEB_A5_A05_CD8 _2020-06-15,1496.530151,180.08432,449.124176,316.395386,271.704956,362.412018,-7.513265,3725.480225,281.33783,142.584427,9800.442383,FALSE,-0.997700520900471,28.779474738485,"14"
export_AJP SEB_A5_A05_CD8 _2020-06-15,2319.312256,102.829605,213.805954,111.602341,56.044903,1287.930542,38.49873,161.740952,98.922058,954.488464,223.637024,FALSE,-3.18877073860638,-13.2567819228337,"16"
export_AJP SEB_A5_A05_CD8 _2020-06-15,200.575668,141.021988,633.852844,418.945984,3096.13623,1669.417358,-66.811615,28654.380859,753.068665,1300.846802,395.071808,FALSE,-26.5836259399781,-26.7129018926247,"2"
export_AJP SEB_A5_A05_CD8 _2020-06-15,431.875427,74.91832,305.248566,265.592987,1772.322754,48.450726,127.709846,56.910789,59.619965,1039.802612,322.801025,FALSE,15.6814777620053,-11.879411319224,"11"
export_AJP SEB_A5_A05_CD8 _2020-06-15,359.062958,100.310997,756.419739,259.639374,-17.661648,1823.733765,322.571228,1995.89978,11509.209961,550.105774,3167.692139,FALSE,-43.1377408264813,3.13375408173246,"7"
export_AJP SEB_A5_A05_CD8 _2020-06-15,-86.474136,83.885002,1506.822876,92.561317,651.458313,1823.319458,-6.606333,8139.581055,5198.917969,405.166718,1126.876221,FALSE,-20.1928402045785,-24.1690481716673,"2"
export_AJP SEB_A5_A05_CD8 _2020-06-15,15005.177734,39.989006,2124.826416,402.861023,3132.905029,198.453033,91.478195,418.878967,440.749664,13698.076172,363.966003,FALSE,32.3207030226878,35.3742061620228,"23"
export_AJP SEB_A5_A05_CD8 _2020-06-15,142.634613,192.016953,496.912933,277.888947,1840.526855,461.547821,-84.544365,484.116547,279.48938,6340.498535,443.595734,FALSE,16.909519237673,-30.263541442372,"25"
export_AJP SEB_A5_A05_CD8 _2020-06-15,1610.141968,228.479187,1576.812988,3502.830322,857.079346,-4.832651,36.187225,324.872498,1832.971069,251.408157,-60.612629,FALSE,25.5685758111389,1.98601441294927,"18"
export_AJP SEB_A5_A05_CD8 _2020-06-15,408.213867,121.399094,1557.109497,493.17511,48.594036,1983.463257,11.480593,18576.464844,1023.076538,620.199951,2795.879883,FALSE,-27.2110479759663,-28.6091422824682,"2"
export_AJP SEB_A5_A05_CD8 _2020-06-15,69.725937,184.56514,403.930145,160.243576,556.362732,677.552185,-20.507042,5318.691406,683.16449,37.314323,75.451424,FALSE,-3.8323567496642,-21.7460427368295,"11"
export_AJP SEB_A5_A05_CD8 _2020-06-15,6145.563477,154.667145,239.228058,668.930176,1090.832642,110.34304,4.32493,337.417358,298.375,945.24115,337.189758,FALSE,30.2053682415292,20.6732755921998,"18"
export_AJP SEB_A5_A05_CD8 _2020-06-15,9239.669922,107.223267,503.185303,316.781464,3181.816162,312.086945,-455.665131,-343.934967,472.878357,49860.289063,952.595032,FALSE,30.6621152452882,-31.9034913387147,"12"
export_AJP SEB_A5_A05_CD8 _2020-06-15,18968.589844,126.479248,287.064514,208.26239,1959.261108,644.280518,-28.956585,77.921249,325.350189,900.895203,527.840881,FALSE,28.0170181300371,32.5469956168077,"5"
export_AJP SEB_A5_A05_CD8 _2020-06-15,11609.015625,118.03801,386.373535,1202.5979,1251.600098,-16.334394,0.309393,369.713196,167.89267,1072.98877,514.179993,FALSE,32.0272020951227,32.9834344602182,"23"
export_AJP SEB_A5_A05_CD8 _2020-06-15,115.279312,116.350502,531.061829,103.890099,502.150757,229.462906,34.388042,-216.394989,578.465759,237.383713,-29.279043,FALSE,4.65358857806163,-12.0902242432868,"9"
export_AJP SEB_A5_A05_CD8 _2020-06-15,787.966736,179.306808,437.639465,152.426559,414.244507,561.198303,85.278053,1776.853271,106.321419,751.383362,32154.958984,FALSE,-8.96743807996465,51.9984059337591,"22"
export_AJP SEB_A5_A05_CD8 _2020-06-15,7829.125488,162.642426,350.061615,2053.500244,1409.250366,-50.82655,-5.937874,-1.920194,139.471359,1357.828247,284.238098,FALSE,34.1927974398593,24.9966570336915,"23"
export_AJP SEB_A5_A05_CD8 _2020-06-15,505.508331,53.424812,882.792847,206.686218,1154.590698,1769.38562,-34.509186,5979.271973,1032.057251,375.767151,3868.165039,FALSE,-15.0499887951381,-32.144683682672,"24"
export_AJP SEB_A5_A05_CD8 _2020-06-15,611.948181,53.264729,364.035217,117.723557,427.836914,1056.015381,23.045486,-208.143738,101.873611,485.384796,875.134521,FALSE,-5.73094273260148,-27.8986096447666,"16"
export_AJP SEB_A5_A05_CD8 _2020-06-15,310.950867,194.230835,-202.832672,156.162582,-28.202085,77.013466,597.658752,1747.41394,12383.988281,653.842285,407.629852,FALSE,-38.1529946307536,18.0029423734584,"19"
export_AJP SEB_A5_A05_CD8 _2020-06-15,10636.053711,155.183228,172.968796,652.302795,1253.520996,43.816837,-73.184624,-345.733856,2505.102539,178.187485,43.023407,FALSE,33.3538293882239,33.3084965070741,"23"
export_AJP SEB_A5_A05_CD8 _2020-06-15,662.95575,145.396332,-18.061838,181.606033,298.601349,60.335094,-112.008614,16.480238,3866.072266,524.561707,479.563293,FALSE,-4.64787111092207,1.32559632790246,"8"
export_AJP SEB_A5_A05_CD8 _2020-06-15,342.940704,93.525589,524.180664,45.102062,901.205078,1025.265137,-125.621178,328.811951,119.093887,5907.190918,-9.431425,FALSE,2.79438075323458,-32.2039101517073,"25"
export_AJP SEB_A5_A05_CD8 _2020-06-15,486.826202,221.918091,812.168396,522.11261,637.11499,349.337921,26.877703,3612.249023,396.242188,2307.049072,530.794678,FALSE,2.08045694962658,-19.599385742743,"11"
export_AJP SEB_A5_A05_CD8 _2020-06-15,487.445801,72.969498,175.763321,161.103012,287.61557,53.361038,-12.439688,-26.305552,706.497742,377.495483,285.837738,FALSE,6.13704992539866,-7.08565168549799,"9"
export_AJP SEB_A5_A05_CD8 _2020-06-15,24910.035156,142.328964,547.521484,254.403564,1117.739258,98.260727,87.726135,573.120422,226.988846,1499.761597,116.921364,FALSE,29.7619394585318,36.3024416341447,"5"
export_AJP SEB_A5_A05_CD8 _2020-06-15,94.721184,197.019897,279.795074,922.979919,104.335014,138.916428,95.663597,2071.717529,632.060547,229.640488,30.13022,FALSE,3.94848252884916,-10.5189220492007,"9"
export_AJP SEB_A5_A05_CD8 _2020-06-15,1033.290771,146.8573,253.618637,164.341476,148.940262,107.274643,119.21917,3125.846436,1070.425293,91.059471,234.778305,FALSE,5.93354486382617,-0.549251082971618,"9"
export_AJP SEB_A5_A05_CD8 _2020-06-15,-450.58847,135.621948,1595.581909,814.076599,598.172852,1813.914063,111.743324,649.762756,2917.094482,2253.709717,18483.462891,FALSE,-18.9589615142052,13.0964538517067,"14"
export_AJP SEB_A5_A05_CD8 _2020-06-15,810.532654,156.996857,383.032288,161.472839,2214.786865,887.068726,-321.937714,-24.179939,347.462982,28364.320313,122.287231,FALSE,27.843067077736,-37.3299643509198,"25"
export_AJP SEB_A5_A05_CD8 _2020-06-15,455.593506,161.286346,811.533081,317.571533,1252.357056,2744.286133,49.384869,14644.707031,1441.086304,468.80896,456.538788,FALSE,-25.7450418847825,-37.4437016263343,"24"
[truncated: 251,094+ more rows]
