# Supplementary material for: Selective loss of CD107a TIGIT+ memory HIV-1-specific CD8+ T cells in PLWH over a decade of ART
Source: eLife. 2023 Sep 19;12:e83737. doi: 10.7554/eLife.83737 (PMC10508883; doi:10.7554/eLife.83737)
Supplement: Figure 3—source data 2. [file elife-83737-fig3-data2.xlsx]

## Sheet: Sheet1
			Clusters with statistical differences between groups							Other clusters with no significant differences between groups
Patients	Group	Condition	C2	C3	C5	C6	C8	C14		C1	C4	C7	C9	C10	C11	C12	C13	C15	C16	C17	C18	C19	C20	C21	C22	C23	C24	C25	C26	C27	C28	C29
EI1	Ei	SEB	6.24	9.93	1.06	0.16	6.38	5.34		1.19	1.33	3.53	0.49	3.07	2.79	3.2	5.53	4.75	2.66	18.37	1.14	3.17	1.33	0.41	0.38	5.18	0.87	1.19	1.19	0	1.33	0.11
EI10	Ei	SEB	6.34	15.85	1.79	0.21	3.65	3.58		1.1	0.76	3.79	0.55	5.03	2.89	1.79	1.17	0.69	1.17	2.69	4.55	2.83	2.55	2.69	2	1.79	2.55	2.21	1.1	9.65	0.76	9.51
EI11	Ei	SEB	0.97	5.08	3.51	0.85	22.55	2.71		0.07	0.12	1.31	0.11	12.16	1.35	7.66	2.75	0.75	3.72	3.17	10.93	7.96	0.63	0.32	0.87	2.02	6.73	1.58	0.59	0.4	0.24	1.62
EI13	Ei	SEB	1.58	11.48	4.58	1.62	10.75	2.3		0.02	0.6	2.89	0.26	3.06	9.42	3.33	5.23	0.35	0.82	1.41	7.97	6.8	0.98	0.27	1.04	1.86	5.27	1.74	0.07	1.1	0.12	1.27
EI16	Ei	SEB	2.26	13	1.35	2.4	4.97	2.7		0	1.58	0.8	0.23	1.2	3.2	2.56	2.59	0.41	0.28	2.42	2.1	4.51	6.99	0.28	3.93	2.42	4.1	8.36	0.02	0.68	0.6	2.65
EI17	Ei	SEB	1.9	13.58	2.78	2.55	2.61	10.03		0.13	3.82	0.9	0.52	0.65	1.26	2.67	2.33	0	0.15	1.96	1.5	6.02	4.06	0.53	6.25	4.82	3.01	2.26	0	6.4	1.58	13.39
EI18	Ei	SEB	6.46	17.76	4.08	0.38	0.94	3.91		1.88	1.44	0.83	14.01	2.22	0.38	4.06	1.96	0.08	0.31	1.4	1.21	4.3	10.9	0.31	4.34	2.15	1.36	3.24	0.13	3.34	3.82	9.35
EI19	Ei	SEB	13.08	10.98	1.46	0.23	0.4	17.44		0.21	0.49	0.25	1.73	0.15	0.52	2.51	1.69	2.52	2.01	7.97	1.65	2.17	3.07	0.32	0.43	3.23	4.85	5.65	1.88	0.07	1.44	0.11
EI2	Ei	SEB	7.03	4.97	7.5	0.53	6.3	6.89		0.34	0.74	8.26	0.11	0.55	3.64	4.74	4.46	1.96	2.23	4.29	2.81	8.87	3.44	0.14	5.98	2.47	1.29	1.04	0.34	1.93	0.74	1.75
EI20	Ei	SEB	2.88	13.73	1.15	1.15	4.61	4.72		0.79	1.59	1.66	0.32	0.5	2.53	2.8	5.27	0.36	0.97	2.2	1.44	4.83	7.53	0.11	7.1	3.57	1.23	1.19	0.79	3.17	1.59	3.46
EI21	Ei	SEB	0.55	26.75	0.42	0.18	7.58	10.42		0.64	1.19	0.61	0.04	1.31	1.12	2.85	2.92	0.21	1.65	10.25	5.21	20	1.06	0.08	1.31	4.53	5.17	1.86	0.64	2.63	1.19	4.19
EI22	Ei	SEB	2.84	5.64	2.08	0.08	5.36	2.37		0.28	0.48	1.19	0.15	1.44	1.23	10.76	5.93	0.19	1.28	1.75	2.38	4.48	10.34	0.42	4.66	3.02	6.52	8.79	0.28	0.01	0.48	2.17
EI23	Ei	SEB	6.12	12.36	1.69	0.92	4.57	10.67		1.04	0.32	0.79	0.59	0.83	0.99	8.44	3.63	0.17	1.44	1.65	6.86	6.18	1.99	3.22	2.2	0.47	8.59	5.29	3.85	10.92	0.38	9.39
EI24	Ei	SEB	2.78	10.2	21.95	0.79	3.71	7.49		0.08	0.59	0.5	4.34	4.17	1.24	7.67	8.91	0.27	1.4	2.48	2.05	11.41	3.83	1.17	3.6	3.94	1.87	2.21	1.04	0.09	0.32	9.05
EI3	Ei	SEB	2.14	2.35	1.25	0.39	7.56	2.77		0.3	0.48	24.64	5.06	2.92	1	0.46	2.1	38.54	0.72	5.77	0.05	0.18	1.17	0.08	0.3	0.61	0.09	0.4	0.21	0.04	0.49	0.09
EI4	Ei	SEB	7.58	14.32	1.19	2.36	4.24	13.1		0.4	0.38	0.63	0.14	2.22	0.8	0.76	1.64	0.34	0.08	3.79	1.85	1.9	2.99	0.04	2.27	7.46	0.8	1.01	0.08	0	0.59	1.18
EI5	Ei	SEB	0.44	11.73	16.39	0.06	2.74	6.19		0.11	0.99	0.12	0.71	3.07	3.21	7.8	7.32	0.12	1.31	1.79	4.76	9.4	2.02	0.12	0.83	6.01	5.3	7.68	0.3	0	0.48	0.42
EI6	Ei	SEB	5.96	27.23	2.21	0.43	1.88	5.36		0.16	0.41	4.87	8.01	0.25	3.09	0.51	2.95	2.02	0.73	2.31	0.93	0.54	2.62	0.32	6.89	1.47	0.78	3.64	0.4	7.47	0.38	4.03
EI7	Ei	SEB	1.14	7.62	2.29	8.17	1.82	12.94		3.85	0.38	1.21	0.42	4.99	1.54	0.55	0.6	0.27	0	4	9.65	5.87	2.74	0.44	0.82	4	2.85	0.93	0.11	2.58	0.99	5.1
EI8	Ei	SEB	3.63	3.92	3.99	0.57	0.08	5.39		0.56	0.48	28.19	39.79	0.04	1.06	0.33	2.21	23.28	0.9	8.01	0.41	1.96	1.23	0.25	0.25	1.55	0.16	0.25	0.16	0	0.41	0.25
EI9	Ei	SEB	4.39	0.53	3.68	0.43	5.98	16.15		0.59	0.24	7.33	0.16	6.02	0.26	0.22	2.76	10.48	0.39	4.59	0.02	2.8	1.28	0.23	0.84	1.4	0.01	0.53	0.56	0.2	0.48	0.35
HC1	HC	SEB	6.59	2.24	5.03	0.69	0.18	10.07		6.64	0.46	0.59	2.29	0.41	0.5	5.49	4.76	1.1	4.12	4.81	0.5	6.41	1.69	1.51	1.19	15.47	0.46	3.8	6.64	0	0.46	0.18
HC10	HC	SEB	0.37	2.91	8.28	3.04	9.22	17.91		0	1.08	0.64	0.88	0.34	4.86	1.39	9.73	0.07	0.74	12.6	1.45	4.29	4.86	0.14	1.15	1.76	0.91	1.15	0	0.95	1.08	5.41
HC11	HC	SEB	0.36	4.5	5.58	2.34	0.54	8.09		6.29	1.08	0	3.42	0.36	1.26	0	3.96	0.18	0.72	0	0.9	0.72	3.24	7.19	2.88	1.8	0	0.9	6.29	16.01	1.08	20.68
HC12	HC	SEB	0.36	7.89	7.48	2.45	3.97	17.86		0.02	0.32	0.48	0.32	2.07	2.71	1.59	2.83	0.12	0.26	0.72	4.74	10.03	4.45	0.22	4.67	4.21	1.36	2.41	0.02	2.31	0.32	1.69
HC14	HC	SEB	2.53	7.12	9.51	1.98	1.46	18.77		1.05	1	0.2	0.64	0.09	0.73	1.71	2.14	0.08	0.36	0.95	1.23	1.82	3.44	0.75	0.79	7.16	0.59	0.71	1.38	0.2	0.55	1.58
HC15	HC	SEB	0.4	14.29	3.7	0.99	2.25	5.56		0.99	0.33	0	0.13	1.06	0.26	5.36	1.65	0.05	0.14	1.18	0.89	1.77	7.53	3.34	5.71	5.76	0.8	2.21	1.05	0.43	1	16
HC16	HC	SEB	0.61	6.8	2.33	0.65	11.46	3.94		0.01	0.44	0.43	0.28	9.03	1.87	3.59	1.02	0.07	0.26	0.73	1.65	5.29	4.7	0.26	2.51	9.19	2.18	2.84	0.99	6.22	0.33	16.53
HC17	HC	SEB	0.36	8.34	6.55	0.36	1.35	13.09		3.5	1.08	0.45	1.88	1.17	0.45	0.72	1.26	0.06	0.11	0.89	14.98	7.67	3.14	0.29	2.28	1.64	13.65	5.45	0.01	1.71	0.44	1.3
HC18	HC	SEB	0.84	9.42	10.26	1.61	5.21	16.62		0.23	0.38	0.08	1.3	1.91	0.84	1.68	1.3	0	0.45	1.52	2.78	1.61	8.34	3.05	1.97	3.32	1.35	2.15	3.5	6.82	1.08	18.65
HC19	HC	SEB	1.23	5.64	6.99	0.98	0.86	18.16		1.1	2.7	0.98	1.23	1.23	1.84	0.61	2.82	0	0.15	1.99	2.99	4.13	8.27	0.31	3.98	1.3	1.61	3.22	0.23	1.84	0.38	11.79
HC2	HC	SEB	1.04	11.94	3.12	1.11	6.25	9.44		0	0.76	2.29	0.28	2.5	5.97	2.64	3.75	0	1.47	1.47	3.19	2.45	6.01	0.74	7.73	0.86	2.21	0.37	1.1	6.01	2.7	10.18
HC20	HC	SEB	0.3	6.56	6.17	0.28	1.52	15.54		0.08	0.23	0.08	1.22	2.97	0.08	0.71	2.14	0.21	0.62	3.12	3.26	2.98	5.76	1.11	4.3	3.61	2.29	0.62	0	4.58	0.76	7.01
HC24	HC	SEB	2.04	17.52	18.56	0.3	0.19	22.32		0.09	0.47	0.15	5.85	0.73	0.23	0.61	0.61	0.15	0.15	0.76	1.37	1.75	9.9	0.23	5.26	2.67	0.3	2.74	0.08	4.04	0.23	5.86
HC3	HC	SEB	0.85	2.63	3.75	2.41	9.8	15.65		0	0.6	1.96	1.45	1.7	0.45	8.97	0.62	0.38	0.17	3.84	2.32	4.66	4.64	0.02	0.47	4.85	5.3	11.03	0.09	0	0.47	0.05
HC4	HC	SEB	9.4	6.13	4.61	0.77	0.9	14.31		0.06	0.55	0.09	4.97	0.26	0.68	3.49	1.11	0.09	0.09	4.86	7.67	11.67	2.81	0.51	1.96	2.13	3.58	3.41	0	0.94	0.6	8.52
HC5	HC	SEB	0.95	5.4	6.48	0.45	2.1	6.23		1.38	0.55	24.06	37.8	1.15	0.68	0.28	2.82	25.76	0.51	7.72	0.09	0.15	1.24	0.19	0.45	0.87	0.02	0.41	0.06	0.09	0.55	0.32
HC6	HC	SEB	1.42	17.52	4.18	0.15	8.65	8.13		3.43	0.75	0.45	8.35	2.24	2.68	2.83	3.28	0	1.42	1.04	4.62	6.41	1.57	0.15	0.52	6.56	4.25	4.47	3.43	0	0.75	0
HC7	HC	SEB	1.36	9.42	3.79	0.9	10.4	7.54		0.26	0.17	0.51	0.38	6.91	14.66	0.3	6.52	0	1.66	7.67	10.32	4.65	2.69	0.21	2.05	1.71	0.77	0.72	0.26	0.72	0.17	1.45
HC8	HC	SEB	1.77	9.67	4.27	1.21	2.5	10.48		0	0.81	0.32	1.53	1.29	0.89	0.64	2.01	0.24	0	1.53	1.13	4.92	4.35	1.69	6.12	2.18	0.32	1.45	0	15.71	0.81	10.39
HC9	HC	SEB	0.72	6.56	9.84	1.59	0.87	17.83		0.26	4.2	0.05	1.08	0.15	0.26	0.97	1.74	0	0.2	1.08	1.18	3.18	4.87	0.61	3.84	7.68	0.51	1.02	0.26	2.25	4.2	15.42
S1	S1	SEB	3.22	6.23	3.22	0.32	4.19	12.89		1.07	1.4	3.97	15.79	3.65	1.83	3.33	3.33	0.64	0.86	6.12	6.34	5.05	4.3	0.11	0.86	3.97	3.33	1.93	1.07	0.11	1.4	0.11
S10	S1	SEB	0.79	6.5	8.27	0.59	2.56	11.02		0.59	2.56	0.2	21.06	2.95	2.17	4.72	4.13	0.4	1.07	9.26	3.22	2.95	5.37	0.07	1.88	6.3	1.81	2.68	1.07	0	1.95	0.2
S12	S1	SEB	1.85	8	1.45	0.12	5.96	4.14		3.49	1.72	0.89	1.9	7.96	5.02	7.75	6.25	0	1.38	1.38	3.15	7.68	3.35	0	0.79	7.48	1.77	1.97	0.59	0	2.56	0.2
S13	S1	SEB	1.54	5.42	2.92	1.39	0.92	7.7		0.37	0.4	1.29	2.28	2.49	2.09	3.69	4.74	0	2.24	2.89	1.64	14.41	2.04	0.26	0.33	12.83	0.72	1.64	0.59	0	0.72	0.13
S16	S1	SEB	0.99	8.42	21.41	5.94	5.82	15.59		0.12	0.25	0.25	1.98	5.82	0.62	0.87	0.74	0.06	1.13	0.89	2.2	1.13	11.32	2.56	1.19	0.6	1.49	2.14	3.1	3.63	2.14	17.87
S19	S1	SEB	0	16.1	0	0	20.34	7.63		0	0.85	0	1.69	6.78	3.39	0.85	5.08	0.1	3.5	5.26	3.14	7.55	0.56	0.07	0.1	6.37	2.81	9.05	2.19	0	0.82	0.13
S2	S1	SEB	2.79	9.49	4.16	0.26	2.95	12.97		0.63	2.06	1.27	22.72	3.32	1.05	2.16	1.32	0.19	4.4	3.82	2.48	7.25	0.79	0.22	0.17	12.85	1.49	3.79	3.49	0	1.72	0.22
S20	S1	SEB	0.78	9.17	0.64	0.21	9.6	8.25		1	0.5	0.5	0.36	1.64	0.78	6.61	1.71	0.09	0.46	4.03	7.39	9.3	5.6	0.74	3.48	6.37	2.4	1.69	0.37	6.74	0.4	8.65
S21	S1	SEB	1.1	18.68	1.1	0	8.79	3.3		3.3	1.1	0	0	0	4.4	1.1	5.49	0	0	1.2	5.08	8.67	9.87	0.45	3.59	5.98	1.35	2.09	0.15	4.93	0	8.22
S22	S1	SEB	2.59	10.72	1.54	0.31	11.58	4.25		0	0.92	2.28	0	2.65	4.44	9.98	11.28	0.43	0.86	3.17	0.17	1.97	3	1.11	3.17	1.03	0.77	1.11	0.77	30.08	1.71	12.6
S23	S1	SEB	0	5.36	5.36	0	5.36	5.36		3.57	0	0	17.86	0	7.14	8.93	16.07	0	0	1.61	1.73	3.84	2.72	0.87	2.48	2.97	0.74	0.74	0.12	3.71	0.25	4.95
S24	S1	SEB	2.52	8.82	6.09	1.89	6.09	7.14		1.68	0.42	0.42	0.84	0.42	2.31	4.62	5.25	0	0	0.38	1.53	3.06	1.53	0.19	1.15	1.34	0	0.76	0	0.57	0.38	1.72
S3	S1	SEB	3.42	4.56	0.43	0.14	1.28	4.7		0	0.57	2.56	5.13	1.99	12.82	4.99	13.96	0.85	0	0.85	5.93	8.47	5.08	0	0.85	3.39	2.54	4.24	0	1.69	0.85	0.85
S5	S1	SEB	2.45	9.62	2.9	0.18	6.44	7.8		0.36	0.82	1.81	35.84	2.36	2.09	1.09	2.09	0.05	0.25	4.31	0.84	2.28	5.4	0.35	1.88	2.23	1.19	3.07	0	3.67	0.79	8.38
S6	S1	SEB	NA	NA	NA	NA	NA	NA		NA	NA	NA	NA	NA	NA	NA	NA	NA	NA	NA	NA	NA	NA	NA	NA	NA	NA	NA	NA	NA	NA	NA
S7	S1	SEB	0.43	3.87	3.23	0.22	4.19	5.05		0.65	1.08	1.18	1.51	5.48	0.86	4.52	2.04	0.11	0	3.48	1.79	3.27	5.11	0.42	1.05	8.22	1.05	3.64	0.63	0	2.06	0.74
S8	S1	SEB	1.19	5.89	1.19	0.13	3.63	3.16		0.04	0.38	5.67	1.83	3.92	4.99	2.82	3.71	0.12	0.35	1.1	1.02	2.78	7.68	0.9	1.72	6.74	0.78	5.21	2.98	0.04	2.08	0.59
S9	S1	SEB	1.15	8.1	16.74	2.98	2.46	10.63		0.11	0.91	0.49	0.62	1.51	1.81	2.47	3.25	0	0.36	2.84	5.76	12.8	2.77	0.5	2.28	3.06	3.91	2.28	1	5.05	0.5	10.53
S1	S2	SEB	4.56	5.37	6.37	0.94	0.87	16.7		1.07	1.95	3.82	10.53	1.61	2.15	3.29	3.76	0.02	4.09	1.39	1.94	3.16	11.62	0.36	4.39	2.91	2.11	3.59	1.43	3.43	0.81	9.26
S10	S2	SEB	0.79	3.75	5.86	0.33	0.86	10.59		0.59	0.72	0.39	13.68	0.66	0.99	3.68	11.38	0	1.31	0.78	6.21	13.66	1.61	0.54	2.15	5.19	5.55	3.4	1.25	4.42	0.42	10.74
S11	S2	SEB	0.18	5.96	10.78	1.91	0.83	11.79		3.1	2.14	0.54	2.03	2.8	2.86	0.66	3.1	0	1.1	1.1	3.3	12.09	2.2	1.1	4.4	7.69	2.2	1.1	3.3	3.3	1.1	7.69
S12	S2	SEB	1.27	4.87	0.95	0.07	7.45	5.65		2.19	0.82	1.93	1.96	10.1	9.84	7.19	5.65	0.18	1.97	6.1	1.54	7.27	3.51	0.06	1.85	6.28	1.91	1.54	0	0.18	0.92	1.97
S13	S2	SEB	0.15	2.69	6.13	1.79	1.05	20.33		0.15	0	0	1.64	3.44	1.2	2.54	2.24	0.27	1.18	5.7	1.24	6.44	6.24	0.21	2.87	5.89	1.9	3.17	0.06	0.93	0.63	2.11
S14	S2	SEB	1.03	2.74	1.97	0.51	0.94	9.51		0.77	1.71	1.2	2.06	0.94	2.83	0.77	3.26	0	1.79	1.79	0	5.36	0	0	0	5.36	5.36	5.36	3.57	0	0	0
S16	S2	SEB	0.57	5.74	40.34	11.47	3.44	20.08		0	0.38	0.19	0.96	1.15	0.38	0	0.19	0.28	0.97	5.53	5.95	9.27	3.46	0.14	0.28	3.18	6.36	5.95	0.41	0	1.94	0.83
S19	S2	SEB	1.44	5.11	17.6	6.49	1.74	16.31		0	0.79	0.35	0.94	0.59	0.59	3.97	2.08	0	1.89	1.26	2.94	8.61	5.46	0.84	1.47	4.2	2.94	6.51	1.68	0	0.42	12.82
S2	S2	SEB	0.9	4.54	7.99	0.86	1.02	15.28		2.98	2.08	0.35	27.03	0.86	0.24	2.74	0.63	0.03	0.93	1.36	2.2	11.49	4	2.44	3.19	6.4	1.53	2.09	7.02	0.59	0.64	18.35
S20	S2	SEB	0.86	8.09	4.44	0.63	4.05	12.46		1.43	0.81	0.32	0.19	0.62	2.81	2.61	5.32	1.14	5.98	7.26	6.98	8.4	1.57	0	1	2.42	3.99	2.71	0	0	0.57	0.14
S21	S2	SEB	0.12	10.98	1.31	0.24	4.71	4.53		1.25	0.42	0.12	0.66	1.85	1.13	9.19	3.46	0.61	7.21	12.71	10.36	6.85	1.2	0.07	0.19	1.77	2.89	0.34	0.11	0.01	0.6	0.08
S22	S2	SEB	1.96	8.45	2.72	0.47	4.96	7.87		0.06	0.63	1.22	0.14	1.02	2.55	14.08	12.13	0.2	1.11	4.71	5.1	8.19	7.95	1.34	4.11	1.62	5.22	4.51	0.99	1.46	0.32	5.89
S23	S2	SEB	0.55	3.46	2.9	0.14	3.73	11.48		0.41	1.94	1.38	9.27	1.52	3.18	9.13	7.88	0.91	0.54	4.54	2.09	2.36	1	1.45	0.64	3.18	2.09	3.27	0.36	0	0.82	1
S24	S2	SEB	1.28	5.7	5.41	2.9	2.11	7.9		7.02	0.64	0.18	0.94	0.32	0.64	3.29	3.91	0.16	0.24	2.74	1.69	3.3	1.29	0.81	0.56	1.45	2.5	6.04	0.56	0.08	1.29	0.89
S3	S2	SEB	1.79	2.62	1.07	0.08	1.26	7.17		0.11	0.6	4.16	4.63	1.04	17.16	1.6	11.98	0.11	0.43	2.26	2.69	2.8	5.81	1.08	3.12	0.75	3.12	8.6	0.65	20	1.08	7.96
S4	S2	SEB	0.55	3.2	3.4	0.63	0.59	14.44		0.99	0.32	1.82	0.51	3.48	3.4	6.88	4.19	0.06	0.28	3.78	2.85	5.61	4.71	0.59	4.46	2.45	3.84	11.06	0.71	11.43	0.87	4.43
S5	S2	SEB	0.89	4.03	3.06	0.32	7.89	8.37		0.56	1.29	0.48	40.74	2.33	1.53	1.61	3.86	0.21	2.13	23.63	15.36	6.66	1.32	0.09	0.21	3.28	5.72	1.79	0.04	0	0.38	0.04
S6	S2	SEB	NA	NA	NA	NA	NA	NA		NA	NA	NA	NA	NA	NA	NA	NA	NA	NA	NA	NA	NA	NA	NA	NA	NA	NA	NA	NA	NA	NA	NA
S7	S2	SEB	0.59	4.65	2.2	0.19	4.62	5.73		0.71	0.87	0.99	0.71	6.29	0.99	6.63	2.08	0.35	1.66	25.57	4.78	7.85	4.57	0.11	0.43	4.78	3.29	4.08	0.49	0.16	0.87	0.27
S8	S2	SEB	2.31	1.41	1.25	0.08	0.68	8.56		0.49	0.87	2.8	5.57	0.52	1.52	8.21	6.3	0.11	0.72	1.1	2.93	4.12	3.02	0.64	4.78	3.46	1.61	2.72	0.11	5.1	0.91	5.19
S9	S2	SEB	1.78	5.77	21.76	8.18	1.31	11.54		0.1	0.52	0.21	0.84	1.1	1.73	0.79	2.41	0.1	0.16	1.26	1.36	2.73	2.83	0.79	5.51	2.52	0.58	1.31	0.1	2.36	0.52	4.93
