# Supplementary material for: Selective loss of CD107a TIGIT+ memory HIV-1-specific CD8+ T cells in PLWH over a decade of ART
Source: eLife. 2023 Sep 19;12:e83737. doi: 10.7554/eLife.83737 (PMC10508883; doi:10.7554/eLife.83737)
Supplement: Figure 3—source data 3. [file elife-83737-fig3-data3.xlsx]

## Sheet: SEB-activated CD8+ T cells
Patients	Group	Condition	Population	CD107a	IFNy	IL-2
EI1	Ei	SEB	total CD8+ T cells	13.895	13.39	1.725
EI10	Ei	SEB	total CD8+ T cells	11.35	10.09	3.53
EI11	Ei	SEB	total CD8+ T cells	NA	NA	NA
EI13	Ei	SEB	total CD8+ T cells	NA	NA	NA
EI16	Ei	SEB	total CD8+ T cells	32.505	30.26	5.945
EI17	Ei	SEB	total CD8+ T cells	11.46	12.0965	7.125
EI18	Ei	SEB	total CD8+ T cells	6.135	6.475	3.285
EI19	Ei	SEB	total CD8+ T cells	4.985	5.109	2.805
EI2	Ei	SEB	total CD8+ T cells	3.925	3.655	1.095
EI20	Ei	SEB	total CD8+ T cells	12.485	12.725	4.295
EI21	Ei	SEB	total CD8+ T cells	11.405	12.89	2.255
EI22	Ei	SEB	total CD8+ T cells	9.72	14.6595	1.275
EI23	Ei	SEB	total CD8+ T cells	17.32	21.1015	6.935
EI24	Ei	SEB	total CD8+ T cells	7.66	10.178	2.68
EI3	Ei	SEB	total CD8+ T cells	28.485	32.21	3.565
EI4	Ei	SEB	total CD8+ T cells	6.155	3.99	3.695
EI5	Ei	SEB	total CD8+ T cells	13.735	12.99	0.91
EI6	Ei	SEB	total CD8+ T cells	16.175	12.255	4.01
EI7	Ei	SEB	total CD8+ T cells	14.615	10.8	11.805
EI8	Ei	SEB	total CD8+ T cells	10.555	9.955	5.305
EI9	Ei	SEB	total CD8+ T cells	19.55	16.71	3.95
HC1	HC	SEB	total CD8+ T cells	4.205	3.97	2.755
HC10	HC	SEB	total CD8+ T cells	6.035	4.396	3.09
HC11	HC	SEB	total CD8+ T cells	0.99	0.435	0.595
HC12	HC	SEB	total CD8+ T cells	9.28	7.7	3.145
HC14	HC	SEB	total CD8+ T cells	4.58	4.1845	5.45
HC15	HC	SEB	total CD8+ T cells	8.045	8.855	4.805
HC16	HC	SEB	total CD8+ T cells	17.64	16.1045	3.795
HC17	HC	SEB	total CD8+ T cells	2.65	1.545	0.895
HC18	HC	SEB	total CD8+ T cells	6.78	5.465	3.905
HC19	HC	SEB	total CD8+ T cells	8.585	6.685	5.18
HC2	HC	SEB	total CD8+ T cells	9.655	6	1.01
HC20	HC	SEB	total CD8+ T cells	7.735	6.9	1.715
HC24	HC	SEB	total CD8+ T cells	8.81	5.635	3.525
HC3	HC	SEB	total CD8+ T cells	5.41	5.885	5.225
HC4	HC	SEB	total CD8+ T cells	4.98	3.5355	1.105
HC5	HC	SEB	total CD8+ T cells	2.695	2.335	3.07
HC6	HC	SEB	total CD8+ T cells	5.275	4.005	0.025
HC7	HC	SEB	total CD8+ T cells	7.125	1.835	0
HC8	HC	SEB	total CD8+ T cells	6.92	4.115	3.055
HC9	HC	SEB	total CD8+ T cells	6.5	4.505	4.93
S1	S1	SEB	total CD8+ T cells	4.19	3.575	1.105
S10	S1	SEB	total CD8+ T cells	2.885	2.325	0.77
S12	S1	SEB	total CD8+ T cells	15.04	17.475	1.765
S13	S1	SEB	total CD8+ T cells	9.165	9.483	5.475
S16	S1	SEB	total CD8+ T cells	5.8	3.599	4.84
S19	S1	SEB	total CD8+ T cells	11.775	9.9945	3.825
S2	S1	SEB	total CD8+ T cells	2.31	1.49	0.035
S20	S1	SEB	total CD8+ T cells	5.705	5.985	1.795
S21	S1	SEB	total CD8+ T cells	2.835	2.11	0
S22	S1	SEB	total CD8+ T cells	8.05	9.82	2.13
S23	S1	SEB	total CD8+ T cells	2.19	4.8	4.075
S24	S1	SEB	total CD8+ T cells	3.335	3.87	2.335
S3	S1	SEB	total CD8+ T cells	5.875	6.03	0.79
S5	S1	SEB	total CD8+ T cells	3.3	2.5	1.34
S6	S1	SEB	total CD8+ T cells	7.58	6.61	2.15
S7	S1	SEB	total CD8+ T cells	6.985	7.34	4.43
S8	S1	SEB	total CD8+ T cells	5.48	4.4	0.845
S9	S1	SEB	total CD8+ T cells	7.625	6.61	7.03
S1	S2	SEB	total CD8+ T cells	4.475	3.66	1.29
S10	S2	SEB	total CD8+ T cells	1.795	3.125	1.795
S11	S2	SEB	total CD8+ T cells	7.48	4.665	3.285
S12	S2	SEB	total CD8+ T cells	13.855	19.015	5.31
S13	S2	SEB	total CD8+ T cells	6.045	6.51	6.235
S14	S2	SEB	total CD8+ T cells	2.985	3.005	5.51
S16	S2	SEB	total CD8+ T cells	5.7	2.115	7.465
S19	S2	SEB	total CD8+ T cells	6.695	5.885	8.095
S2	S2	SEB	total CD8+ T cells	2.52	2.42	1.925
S20	S2	SEB	total CD8+ T cells	9.45	10.4565	5.405
S21	S2	SEB	total CD8+ T cells	6.45	6.33	0.955
S22	S2	SEB	total CD8+ T cells	7.345	10.22	2.96
S23	S2	SEB	total CD8+ T cells	6.52	7.8	1.78
S24	S2	SEB	total CD8+ T cells	4.46	5.3925	5.505
S3	S2	SEB	total CD8+ T cells	6.97	4.83	0.73
S4	S2	SEB	total CD8+ T cells	7.085	8.45	1.255
S5	S2	SEB	total CD8+ T cells	3.155	1.885	1.055
S6	S2	SEB	total CD8+ T cells	5.675	10.65	7.68
S7	S2	SEB	total CD8+ T cells	10.24	12.58	9.06
S8	S2	SEB	total CD8+ T cells	1.515	2.77	0.54
S9	S2	SEB	total CD8+ T cells	6.56	5.695	10.685
EI1	Ei	SEB	Naive CD8+ T cells	1.42	0.35	1.73
EI10	Ei	SEB	Naive CD8+ T cells	1.105	0.345	1.21
EI11	Ei	SEB	Naive CD8+ T cells	NA	NA	NA
EI13	Ei	SEB	Naive CD8+ T cells	NA	NA	NA
EI16	Ei	SEB	Naive CD8+ T cells	2.89	0.615	0.885
EI17	Ei	SEB	Naive CD8+ T cells	4.035	1.265	4.7
EI18	Ei	SEB	Naive CD8+ T cells	1.11	0.2355	2.495
EI19	Ei	SEB	Naive CD8+ T cells	1.97	0.628	1.56
EI2	Ei	SEB	Naive CD8+ T cells	0.925	0.225	0.39
EI20	Ei	SEB	Naive CD8+ T cells	3.035	1.552	3.37
EI21	Ei	SEB	Naive CD8+ T cells	2.45	0.435	1.1
EI22	Ei	SEB	Naive CD8+ T cells	2.085	0.35	0
EI23	Ei	SEB	Naive CD8+ T cells	3.134	1.92	5.265
EI24	Ei	SEB	Naive CD8+ T cells	3.26	0.48	4.51
EI3	Ei	SEB	Naive CD8+ T cells	1.545	2.435	1.96
EI4	Ei	SEB	Naive CD8+ T cells	1.22	0.025	0.37
EI5	Ei	SEB	Naive CD8+ T cells	1.99	0	0
EI6	Ei	SEB	Naive CD8+ T cells	2.31	1.025	3.6
EI7	Ei	SEB	Naive CD8+ T cells	4.39	0.43	9.71
EI8	Ei	SEB	Naive CD8+ T cells	1.94	0.315	2.53
EI9	Ei	SEB	Naive CD8+ T cells	0.735	0.145	1.87
HC1	HC	SEB	Naive CD8+ T cells	2.18	0.515	2.31
HC10	HC	SEB	Naive CD8+ T cells	1.31	0.421	1.955
HC11	HC	SEB	Naive CD8+ T cells	0.495	0.025	0.915
HC12	HC	SEB	Naive CD8+ T cells	0.85	1.105	1.9
HC14	HC	SEB	Naive CD8+ T cells	2.51	0.398	6.585
HC15	HC	SEB	Naive CD8+ T cells	1.72	0.39	1.28
HC16	HC	SEB	Naive CD8+ T cells	1.565	1.061	3.45
HC17	HC	SEB	Naive CD8+ T cells	1.71	0.03	0.65
HC18	HC	SEB	Naive CD8+ T cells	2.235	0.34	0.985
HC19	HC	SEB	Naive CD8+ T cells	3.985	0.46	3.78
HC2	HC	SEB	Naive CD8+ T cells	2.3	0.3	0
HC20	HC	SEB	Naive CD8+ T cells	2.26	0.875	1.635
HC24	HC	SEB	Naive CD8+ T cells	2.325	0.767	1.535
HC3	HC	SEB	Naive CD8+ T cells	1.29	0.715	1.92
HC4	HC	SEB	Naive CD8+ T cells	4.605	0.3115	1.925
HC5	HC	SEB	Naive CD8+ T cells	0.65	0.32	2.075
HC6	HC	SEB	Naive CD8+ T cells	0.585	0	0
HC7	HC	SEB	Naive CD8+ T cells	1.31	0.17	0
HC8	HC	SEB	Naive CD8+ T cells	3.425	0.505	4.13
HC9	HC	SEB	Naive CD8+ T cells	4.64	0.9775	3.455
S1	S1	SEB	Naive CD8+ T cells	0.59	0.395	0.435
S10	S1	SEB	Naive CD8+ T cells	1.18	0.535	0.415
S12	S1	SEB	Naive CD8+ T cells	3.45	1.03	1.355
S13	S1	SEB	Naive CD8+ T cells	0.84	0.66	5
S16	S1	SEB	Naive CD8+ T cells	1.355	0.08	0.165
S19	S1	SEB	Naive CD8+ T cells	1.815	2.53	3.18
S2	S1	SEB	Naive CD8+ T cells	0.415	0	0
S20	S1	SEB	Naive CD8+ T cells	0.29	0.09	0.405
S21	S1	SEB	Naive CD8+ T cells	0.56	0.385	0.52
S22	S1	SEB	Naive CD8+ T cells	1.91	0.685	1.095
S23	S1	SEB	Naive CD8+ T cells	1.045	2.22	4.635
S24	S1	SEB	Naive CD8+ T cells	0.72	0.3595	1.605
S3	S1	SEB	Naive CD8+ T cells	0.625	0.665	0.525
S5	S1	SEB	Naive CD8+ T cells	0.86	0.465	0.98
S6	S1	SEB	Naive CD8+ T cells	1.359	0.55	1.045
S7	S1	SEB	Naive CD8+ T cells	1.305	1.155	1.755
S8	S1	SEB	Naive CD8+ T cells	0.735	1.63	1.835
S9	S1	SEB	Naive CD8+ T cells	1.485	1.165	4.605
S1	S2	SEB	Naive CD8+ T cells	0.72	0.07	0.16
S10	S2	SEB	Naive CD8+ T cells	1.14	0.694	1.85
S11	S2	SEB	Naive CD8+ T cells	3.365	0.4	0.015
S12	S2	SEB	Naive CD8+ T cells	1.67	3.72	4.945
S13	S2	SEB	Naive CD8+ T cells	1.66	0.599	6.075
S14	S2	SEB	Naive CD8+ T cells	1.15	0.935	7.75
S16	S2	SEB	Naive CD8+ T cells	2.155	0.345	3.505
S19	S2	SEB	Naive CD8+ T cells	3.215	1.009	3.42
S2	S2	SEB	Naive CD8+ T cells	0.865	0.305	0.635
S20	S2	SEB	Naive CD8+ T cells	1.6285	0.321	0.795
S21	S2	SEB	Naive CD8+ T cells	2.05	0.18	0
S22	S2	SEB	Naive CD8+ T cells	1.635	1.0095	1.635
S23	S2	SEB	Naive CD8+ T cells	1.95	1.875	3.1
S24	S2	SEB	Naive CD8+ T cells	0.955	0.496	4.475
S3	S2	SEB	Naive CD8+ T cells	1.249	0.265	0.28
S4	S2	SEB	Naive CD8+ T cells	0.41	0.4155	0
S5	S2	SEB	Naive CD8+ T cells	1.4	0.38	0.53
S6	S2	SEB	Naive CD8+ T cells	1.585	5.565	6.025
S7	S2	SEB	Naive CD8+ T cells	1.68	2.84	9.51
S8	S2	SEB	Naive CD8+ T cells	0.35	1.06	0.68
S9	S2	SEB	Naive CD8+ T cells	0.8	1.775	8.195
EI1	Ei	SEB	CM CD8+ T cells	3.22	2.74	1.03
EI10	Ei	SEB	CM CD8+ T cells	5.335	4.275	6.625
EI11	Ei	SEB	CM CD8+ T cells	NA	NA	NA
EI13	Ei	SEB	CM CD8+ T cells	NA	NA	NA
EI16	Ei	SEB	CM CD8+ T cells	7.275	4.272	11.07
EI17	Ei	SEB	CM CD8+ T cells	5.23	3.546	8.24
EI18	Ei	SEB	CM CD8+ T cells	3.38	2.07	4.09
EI19	Ei	SEB	CM CD8+ T cells	5.9015	5.3295	3.925
EI2	Ei	SEB	CM CD8+ T cells	1.33	1.135	0.87
EI20	Ei	SEB	CM CD8+ T cells	5.9905	4.325	8.165
EI21	Ei	SEB	CM CD8+ T cells	7.555	8.595	4.595
EI22	Ei	SEB	CM CD8+ T cells	5.54	2.67	1.525
EI23	Ei	SEB	CM CD8+ T cells	3.15	4.45	6.42
EI24	Ei	SEB	CM CD8+ T cells	3.28	2.245	4.73
EI3	Ei	SEB	CM CD8+ T cells	13.815	14.255	5.285
EI4	Ei	SEB	CM CD8+ T cells	2.415	0.81	4.375
EI5	Ei	SEB	CM CD8+ T cells	6.01	3.715	0.385
EI6	Ei	SEB	CM CD8+ T cells	12.98	8.25	7.3
EI7	Ei	SEB	CM CD8+ T cells	4.775	2.35	15.835
EI8	Ei	SEB	CM CD8+ T cells	4.1	3.335	8.85
EI9	Ei	SEB	CM CD8+ T cells	2.135	0.675	6.61
HC1	HC	SEB	CM CD8+ T cells	7.315	4.11	3.405
HC10	HC	SEB	CM CD8+ T cells	2.22	2.1625	2.705
HC11	HC	SEB	CM CD8+ T cells	0	1.455	1.11
HC12	HC	SEB	CM CD8+ T cells	2.5	2.855	8.46
HC14	HC	SEB	CM CD8+ T cells	1.935	3.1835	5.845
HC15	HC	SEB	CM CD8+ T cells	2.62	3.215	3.125
HC16	HC	SEB	CM CD8+ T cells	5.555	5.4325	7.015
HC17	HC	SEB	CM CD8+ T cells	3.81	2.42	2
HC18	HC	SEB	CM CD8+ T cells	4.015	2.725	3.645
HC19	HC	SEB	CM CD8+ T cells	6.775	5.725	5.485
HC2	HC	SEB	CM CD8+ T cells	5.1	3.29	0.435
HC20	HC	SEB	CM CD8+ T cells	4.19	5.5595	6.77
HC24	HC	SEB	CM CD8+ T cells	7.625	4.59	3.81
HC3	HC	SEB	CM CD8+ T cells	2.145	2.395	4.63
HC4	HC	SEB	CM CD8+ T cells	4.325	0.3285	0.885
HC5	HC	SEB	CM CD8+ T cells	1.94	2.425	3.995
HC6	HC	SEB	CM CD8+ T cells	3.151	1.845	1.26
HC7	HC	SEB	CM CD8+ T cells	3.82	1.415	0
HC8	HC	SEB	CM CD8+ T cells	9.025	3.96	2.605
HC9	HC	SEB	CM CD8+ T cells	6.68	4.52	7.02
S1	S1	SEB	CM CD8+ T cells	3.535	2.47	1.975
S10	S1	SEB	CM CD8+ T cells	2.005	0.2	1.645
S12	S1	SEB	CM CD8+ T cells	5.315	2.09	1.365
S13	S1	SEB	CM CD8+ T cells	3.19	3.774	6.17
S16	S1	SEB	CM CD8+ T cells	3.135	2.17	6.56
S19	S1	SEB	CM CD8+ T cells	6.94	4.145	3.995
S2	S1	SEB	CM CD8+ T cells	2.2	1.445	0.28
S20	S1	SEB	CM CD8+ T cells	5.325	3.79	1.815
S21	S1	SEB	CM CD8+ T cells	2.37	2.76	0.41
S22	S1	SEB	CM CD8+ T cells	5.1435	4.94	2.545
S23	S1	SEB	CM CD8+ T cells	6.275	2.63	9.385
S24	S1	SEB	CM CD8+ T cells	0.605	1.71	2.6
S3	S1	SEB	CM CD8+ T cells	4.13	3.855	1.79
S5	S1	SEB	CM CD8+ T cells	3.7	2.515	2.94
S6	S1	SEB	CM CD8+ T cells	4.96	3.805	2.595
S7	S1	SEB	CM CD8+ T cells	6.95	8.035	9.02
S8	S1	SEB	CM CD8+ T cells	3.24	3.415	1.985
S9	S1	SEB	CM CD8+ T cells	3.195	2.09	8.75
S1	S2	SEB	CM CD8+ T cells	3.3	3.36	2.85
S10	S2	SEB	CM CD8+ T cells	0	1.42	3.36
S11	S2	SEB	CM CD8+ T cells	6.135	3.62	5.01
S12	S2	SEB	CM CD8+ T cells	1.87	4.64	4.21
S13	S2	SEB	CM CD8+ T cells	3.49	4.08	7.91
S14	S2	SEB	CM CD8+ T cells	2.71	3.99	6.225
S16	S2	SEB	CM CD8+ T cells	3.63	0.7	5.59
S19	S2	SEB	CM CD8+ T cells	5.35	3.563	9.8
S2	S2	SEB	CM CD8+ T cells	2.165	2.75	2.71
S20	S2	SEB	CM CD8+ T cells	8.921	8.8315	6.45
S21	S2	SEB	CM CD8+ T cells	5.25	2.685	1.665
S22	S2	SEB	CM CD8+ T cells	3.11	4.97	3.62
S23	S2	SEB	CM CD8+ T cells	4.24	6.32	4.47
S24	S2	SEB	CM CD8+ T cells	1.315	2.1665	6.445
S3	S2	SEB	CM CD8+ T cells	4.5235	3.53	1.78
S4	S2	SEB	CM CD8+ T cells	3.25	6.75	2.1
S5	S2	SEB	CM CD8+ T cells	3.43	1.545	1.98
S6	S2	SEB	CM CD8+ T cells	4.035	11.82	9.515
S7	S2	SEB	CM CD8+ T cells	7.5	9.835	14.305
S8	S2	SEB	CM CD8+ T cells	1.925	3.9	1.335
S9	S2	SEB	CM CD8+ T cells	2.075	2.2	10.035
EI1	Ei	SEB	TM CD8+ T cells	14.425	13.12	2.16
EI10	Ei	SEB	TM CD8+ T cells	15.38	13.32	3.39
EI11	Ei	SEB	TM CD8+ T cells	NA	NA	NA
EI13	Ei	SEB	TM CD8+ T cells	NA	NA	NA
EI16	Ei	SEB	TM CD8+ T cells	37.755	30.316	11.005
EI17	Ei	SEB	TM CD8+ T cells	15.16	16.0445	7.47
EI18	Ei	SEB	TM CD8+ T cells	10.995	11.597	4.8
EI19	Ei	SEB	TM CD8+ T cells	10.245	11.5155	4.63
EI2	Ei	SEB	TM CD8+ T cells	6.335	5.995	2.135
EI20	Ei	SEB	TM CD8+ T cells	23.465	19.97	9.795
EI21	Ei	SEB	TM CD8+ T cells	22.38	23.5445	3.99
EI22	Ei	SEB	TM CD8+ T cells	11.995	11.36	2.695
EI23	Ei	SEB	TM CD8+ T cells	17.28	20.468	6.85
EI24	Ei	SEB	TM CD8+ T cells	17.16	19.17	4.36
EI3	Ei	SEB	TM CD8+ T cells	34.68	36.37	3.7
EI4	Ei	SEB	TM CD8+ T cells	12.665	8.185	10.11
EI5	Ei	SEB	TM CD8+ T cells	18.7	14.62	1.645
EI6	Ei	SEB	TM CD8+ T cells	21.73	16.52	3.555
EI7	Ei	SEB	TM CD8+ T cells	16.415	11.485	16.27
EI8	Ei	SEB	TM CD8+ T cells	15.84	12.165	7.085
EI9	Ei	SEB	TM CD8+ T cells	17.76	13.3	5.93
HC1	HC	SEB	TM CD8+ T cells	7.13	5.475	3.98
HC10	HC	SEB	TM CD8+ T cells	7.935	9.625	8.495
HC11	HC	SEB	TM CD8+ T cells	2.665	0.18	0.395
HC12	HC	SEB	TM CD8+ T cells	13	8.13	4.155
HC14	HC	SEB	TM CD8+ T cells	4.885	5.2185	4.095
HC15	HC	SEB	TM CD8+ T cells	9.22	9.076	6.655
HC16	HC	SEB	TM CD8+ T cells	17.17	13.1515	5.32
HC17	HC	SEB	TM CD8+ T cells	3.49	3	1.745
HC18	HC	SEB	TM CD8+ T cells	9.75	8.375	6.81
HC19	HC	SEB	TM CD8+ T cells	11.11	10.55	6.18
HC2	HC	SEB	TM CD8+ T cells	16.435	10.865	2.54
HC20	HC	SEB	TM CD8+ T cells	13.655	8.739	2.81
HC24	HC	SEB	TM CD8+ T cells	12.545	7.83	4.37
HC3	HC	SEB	TM CD8+ T cells	6.005	5.78	9.835
HC4	HC	SEB	TM CD8+ T cells	11.185	7.8165	4.455
HC5	HC	SEB	TM CD8+ T cells	9.735	8.76	8.45
HC6	HC	SEB	TM CD8+ T cells	9.615	6.81	1.92
HC7	HC	SEB	TM CD8+ T cells	6.61	2.495	0
HC8	HC	SEB	TM CD8+ T cells	9.845	5.177	2.035
HC9	HC	SEB	TM CD8+ T cells	8.615	6.05	5.51
S1	S1	SEB	TM CD8+ T cells	8.655	6.57	2.425
S10	S1	SEB	TM CD8+ T cells	5.47	4.93	3.935
S12	S1	SEB	TM CD8+ T cells	11.54	9.02	3.6
S13	S1	SEB	TM CD8+ T cells	15.83	16.105	10.235
S16	S1	SEB	TM CD8+ T cells	8.765	4.7565	8.26
S19	S1	SEB	TM CD8+ T cells	10.07	6.995	3.55
S2	S1	SEB	TM CD8+ T cells	4.465	3.95	1.67
S20	S1	SEB	TM CD8+ T cells	11.485	9.715	3.27
S21	S1	SEB	TM CD8+ T cells	4.235	2.47	0
S22	S1	SEB	TM CD8+ T cells	11.57	10.545	4.77
S23	S1	SEB	TM CD8+ T cells	2.585	5.43	13.78
S24	S1	SEB	TM CD8+ T cells	8.12	8.35	5.075
S3	S1	SEB	TM CD8+ T cells	11.01	7.815	1.4
S5	S1	SEB	TM CD8+ T cells	10.525	8.09	1.97
S6	S1	SEB	TM CD8+ T cells	15.8	13.025	3.835
S7	S1	SEB	TM CD8+ T cells	13.945	12.975	8.245
S8	S1	SEB	TM CD8+ T cells	6.375	5.6	3.28
S9	S1	SEB	TM CD8+ T cells	11.71	8.26	11.395
S1	S2	SEB	TM CD8+ T cells	11.605	9.585	3.465
S10	S2	SEB	TM CD8+ T cells	5.805	7.385	7.66
S11	S2	SEB	TM CD8+ T cells	16.02	11.605	10.925
S12	S2	SEB	TM CD8+ T cells	5.665	9.415	4.76
S13	S2	SEB	TM CD8+ T cells	7.365	8.85	8.455
S14	S2	SEB	TM CD8+ T cells	5.755	5.7	4.19
S16	S2	SEB	TM CD8+ T cells	7.615	2.27	9.895
S19	S2	SEB	TM CD8+ T cells	11.685	9.8495	14.37
S2	S2	SEB	TM CD8+ T cells	5.61	6.6	4.725
S20	S2	SEB	TM CD8+ T cells	19.26	19.888	11.49
S21	S2	SEB	TM CD8+ T cells	8.282	4.41	1.685
S22	S2	SEB	TM CD8+ T cells	10.6085	11.945	6.18
S23	S2	SEB	TM CD8+ T cells	9.395	9.13	3.375
S24	S2	SEB	TM CD8+ T cells	12.375	12.846	10.505
S3	S2	SEB	TM CD8+ T cells	17.255	10.78	3.695
S4	S2	SEB	TM CD8+ T cells	11.25	13.785	5.745
S5	S2	SEB	TM CD8+ T cells	10.545	6.82	4.915
S6	S2	SEB	TM CD8+ T cells	18.93	22.57	13.86
S7	S2	SEB	TM CD8+ T cells	14.28	14.495	11.555
S8	S2	SEB	TM CD8+ T cells	3.505	5.165	1.195
S9	S2	SEB	TM CD8+ T cells	8.125	5.9	13.775
EI1	Ei	SEB	EM CD8+ T cells	20.025	21.5675	1.2045
EI10	Ei	SEB	EM CD8+ T cells	43.13	43.79	4.425
EI11	Ei	SEB	EM CD8+ T cells	NA	NA	NA
EI13	Ei	SEB	EM CD8+ T cells	NA	NA	NA
EI16	Ei	SEB	EM CD8+ T cells	42.965	43.65	4.225
EI17	Ei	SEB	EM CD8+ T cells	7.71	9.695	4.015
EI18	Ei	SEB	EM CD8+ T cells	9.03	11.113	1.905
EI19	Ei	SEB	EM CD8+ T cells	3.234	5.1475	0.9695
EI2	Ei	SEB	EM CD8+ T cells	8.36	9.825	1.34
EI20	Ei	SEB	EM CD8+ T cells	10.9605	13.79	1.755
EI21	Ei	SEB	EM CD8+ T cells	6.81	11.1025	0.965
EI22	Ei	SEB	EM CD8+ T cells	13.46	23.6275	1.32
EI23	Ei	SEB	EM CD8+ T cells	27.08	34.0347	7.8
EI24	Ei	SEB	EM CD8+ T cells	5.32	9.37	1.05
EI3	Ei	SEB	EM CD8+ T cells	32.725	42.645	2.5655
EI4	Ei	SEB	EM CD8+ T cells	5.66	4.795	1.015
EI5	Ei	SEB	EM CD8+ T cells	14.165	15.365	0.385
EI6	Ei	SEB	EM CD8+ T cells	14.695	12.5635	1.555
EI7	Ei	SEB	EM CD8+ T cells	21.155	17.652	6.25
EI8	Ei	SEB	EM CD8+ T cells	35.99	39.37	6.035
EI9	Ei	SEB	EM CD8+ T cells	28.53	26.545	4.23
HC1	HC	SEB	EM CD8+ T cells	3.085	4.9	1.575
HC10	HC	SEB	EM CD8+ T cells	7.1835	5.677	2.437
HC11	HC	SEB	EM CD8+ T cells	2.73	0.06	0.325
HC12	HC	SEB	EM CD8+ T cells	7.0485	7.645	0.84
HC14	HC	SEB	EM CD8+ T cells	4.41	5.051	3.325
HC15	HC	SEB	EM CD8+ T cells	19.7	24.785	7.795
HC16	HC	SEB	EM CD8+ T cells	19.165	17.865	1.45
HC17	HC	SEB	EM CD8+ T cells	2.355	2.52	1.105
HC18	HC	SEB	EM CD8+ T cells	7.76	7.41	2.41
HC19	HC	SEB	EM CD8+ T cells	11.79	11.8	1.915
HC2	HC	SEB	EM CD8+ T cells	9.3315	8.895	0.35
HC20	HC	SEB	EM CD8+ T cells	20.675	19.91	1.04
HC24	HC	SEB	EM CD8+ T cells	18.955	16.395	2.52
HC3	HC	SEB	EM CD8+ T cells	10.345	12.825	4.52
HC4	HC	SEB	EM CD8+ T cells	3.655	3.6855	0.5505
HC5	HC	SEB	EM CD8+ T cells	11.25	10.935	4.265
HC6	HC	SEB	EM CD8+ T cells	9	8.15	0.865
HC7	HC	SEB	EM CD8+ T cells	4.445	0.95	0
HC8	HC	SEB	EM CD8+ T cells	7.08	8.95	0.43
HC9	HC	SEB	EM CD8+ T cells	5.85	5.675	3.3605
S1	S1	SEB	EM CD8+ T cells	9.72	9.656	1.235
S10	S1	SEB	EM CD8+ T cells	2.65	2.675	0.1
S12	S1	SEB	EM CD8+ T cells	21.905	31.265	1.13
S13	S1	SEB	EM CD8+ T cells	12.82	13.2475	2.295
S16	S1	SEB	EM CD8+ T cells	6.7	5.3385	2.555
S19	S1	SEB	EM CD8+ T cells	19.975	17.185	3.6
S2	S1	SEB	EM CD8+ T cells	5.405	4.4	0.345
S20	S1	SEB	EM CD8+ T cells	9.7915	11.9145	2.59
S21	S1	SEB	EM CD8+ T cells	5.0385	4.03	0.315
S22	S1	SEB	EM CD8+ T cells	7.4275	9.265	1.43
S23	S1	SEB	EM CD8+ T cells	5.24	7.815	2.71
S24	S1	SEB	EM CD8+ T cells	5.265	7.41	1.9
S3	S1	SEB	EM CD8+ T cells	5.375	6.135	0.655
S5	S1	SEB	EM CD8+ T cells	10.885	10.01	1.395
S6	S1	SEB	EM CD8+ T cells	8.615	7.955	0.995
S7	S1	SEB	EM CD8+ T cells	10.255	11.74	1.175
S8	S1	SEB	EM CD8+ T cells	6.9	5.86	0.805
S9	S1	SEB	EM CD8+ T cells	10.13	11.845	2.29
S1	S2	SEB	EM CD8+ T cells	7.105	6.385	0.9285
S10	S2	SEB	EM CD8+ T cells	2.825	5.1555	0.935
S11	S2	SEB	EM CD8+ T cells	7.475	6.53	5.255
S12	S2	SEB	EM CD8+ T cells	18.355	26.805	5.585
S13	S2	SEB	EM CD8+ T cells	6.795	7.195	3.695
S14	S2	SEB	EM CD8+ T cells	2.37	2.4745	1.685
S16	S2	SEB	EM CD8+ T cells	4.205	3.02	2.945
S19	S2	SEB	EM CD8+ T cells	8.95	13.351	4.697
S2	S2	SEB	EM CD8+ T cells	4.855	5.115	2.23
S20	S2	SEB	EM CD8+ T cells	11.204	13.9495	5.79
S21	S2	SEB	EM CD8+ T cells	11.885	14.688	1.87
S22	S2	SEB	EM CD8+ T cells	7.869	10.4545	1.765
S23	S2	SEB	EM CD8+ T cells	13.75	17.24	1.71
S24	S2	SEB	EM CD8+ T cells	8.965	15.4475	3.94
S3	S2	SEB	EM CD8+ T cells	8.5	7.2	0.895
S4	S2	SEB	EM CD8+ T cells	9.56	11.59	0.445
S5	S2	SEB	EM CD8+ T cells	11.51	10.96	2.53
S6	S2	SEB	EM CD8+ T cells	15.835	23.235	6.045
S7	S2	SEB	EM CD8+ T cells	15.775	19.902	4.575
S8	S2	SEB	EM CD8+ T cells	2.45	3.56	0.395
S9	S2	SEB	EM CD8+ T cells	9.495	10.24	4.9
EI1	Ei	SEB	Effector CD8+ T cells	14.495	10.6	2.5245
EI10	Ei	SEB	Effector CD8+ T cells	38.82	33.78	5.24
EI11	Ei	SEB	Effector CD8+ T cells	NA	NA	NA
EI13	Ei	SEB	Effector CD8+ T cells	NA	NA	NA
EI16	Ei	SEB	Effector CD8+ T cells	38.37	39.1415	3.36
EI17	Ei	SEB	Effector CD8+ T cells	11.645	13.3525	7.245
EI18	Ei	SEB	Effector CD8+ T cells	6.4125	7.84	2.255
EI19	Ei	SEB	Effector CD8+ T cells	2.305	3.0745	0.795
EI2	Ei	SEB	Effector CD8+ T cells	7.65	7.315	1.17
EI20	Ei	SEB	Effector CD8+ T cells	7.77	10.087	0.73
EI21	Ei	SEB	Effector CD8+ T cells	3.01	4.64	0.295
EI22	Ei	SEB	Effector CD8+ T cells	9.82	19.001	1.24
EI23	Ei	SEB	Effector CD8+ T cells	11.305	13.9475	4.74
EI24	Ei	SEB	Effector CD8+ T cells	4.93	11.8075	1.24
EI3	Ei	SEB	Effector CD8+ T cells	38.27	47.985	3.8
EI4	Ei	SEB	Effector CD8+ T cells	4.47	2.355	0.425
EI5	Ei	SEB	Effector CD8+ T cells	23.105	27.46	4.635
EI6	Ei	SEB	Effector CD8+ T cells	14.25	10.586	0.985
EI7	Ei	SEB	Effector CD8+ T cells	22.655	18.35	7.52
EI8	Ei	SEB	Effector CD8+ T cells	8.74	9.67	2.41
EI9	Ei	SEB	Effector CD8+ T cells	18.685	15.608	2.24
HC1	HC	SEB	Effector CD8+ T cells	1.32	1.935	1.605
HC10	HC	SEB	Effector CD8+ T cells	10.625	4.8425	1.08
HC11	HC	SEB	Effector CD8+ T cells	6.635	4.71	0
HC12	HC	SEB	Effector CD8+ T cells	10.025	9.925	0.605
HC14	HC	SEB	Effector CD8+ T cells	8.06	8.02	3.705
HC15	HC	SEB	Effector CD8+ T cells	25.22	35.27	14.27
HC16	HC	SEB	Effector CD8+ T cells	31.2	30.215	3.135
HC17	HC	SEB	Effector CD8+ T cells	2.065	1.92	0.39
HC18	HC	SEB	Effector CD8+ T cells	11.21	10.655	3.98
HC19	HC	SEB	Effector CD8+ T cells	19.83	13.015	0.59
HC2	HC	SEB	Effector CD8+ T cells	30.225	12.47	0.91
HC20	HC	SEB	Effector CD8+ T cells	4.325	4.33	0.54
HC24	HC	SEB	Effector CD8+ T cells	31.995	23.6	3.735
HC3	HC	SEB	Effector CD8+ T cells	15.04	17.245	4.995
HC4	HC	SEB	Effector CD8+ T cells	8.915	8.9945	2.0995
HC5	HC	SEB	Effector CD8+ T cells	13.92	13.73	3.81
HC6	HC	SEB	Effector CD8+ T cells	15.915	15.335	1.89
HC7	HC	SEB	Effector CD8+ T cells	12.7	2.98	0
HC8	HC	SEB	Effector CD8+ T cells	9.77	13.15	1.125
HC9	HC	SEB	Effector CD8+ T cells	7.125	9.13	4.81
S1	S1	SEB	Effector CD8+ T cells	6.27	5.685	0.725
S10	S1	SEB	Effector CD8+ T cells	2.645	2.145	0.57
S12	S1	SEB	Effector CD8+ T cells	43.25	48.495	1.525
S13	S1	SEB	Effector CD8+ T cells	22.125	24.2625	3.37
S16	S1	SEB	Effector CD8+ T cells	11.385	9.24	2.63
S19	S1	SEB	Effector CD8+ T cells	18.26	19.2	4.825
S2	S1	SEB	Effector CD8+ T cells	8.825	7.495	0.965
S20	S1	SEB	Effector CD8+ T cells	8.02	9.805	2.785
S21	S1	SEB	Effector CD8+ T cells	1.6265	1.415	0
S22	S1	SEB	Effector CD8+ T cells	8.9025	13.435	1.705
S23	S1	SEB	Effector CD8+ T cells	4.19	8.835	2.585
S24	S1	SEB	Effector CD8+ T cells	2.645	2.7485	1.425
S3	S1	SEB	Effector CD8+ T cells	8.36	9.485	0.83
S5	S1	SEB	Effector CD8+ T cells	16.55	12.415	2.5
S6	S1	SEB	Effector CD8+ T cells	7.335	7.15	1.865
S7	S1	SEB	Effector CD8+ T cells	10.32	9.505	1.265
S8	S1	SEB	Effector CD8+ T cells	2.955	1.07	1.07
S9	S1	SEB	Effector CD8+ T cells	13.86	14.005	1.455
S1	S2	SEB	Effector CD8+ T cells	6.525	5.7	0.665
S10	S2	SEB	Effector CD8+ T cells	0.47	1.97	0.6185
S11	S2	SEB	Effector CD8+ T cells	7.005	6.71	2.015
S12	S2	SEB	Effector CD8+ T cells	55.475	59.965	6.065
S13	S2	SEB	Effector CD8+ T cells	18.84	20.075	6.915
S14	S2	SEB	Effector CD8+ T cells	3.66	3.12	2.165
S16	S2	SEB	Effector CD8+ T cells	11.05	6.64	8.54
S19	S2	SEB	Effector CD8+ T cells	5.19	7.831	4.231
S2	S2	SEB	Effector CD8+ T cells	18.555	20.81	7.875
S20	S2	SEB	Effector CD8+ T cells	27.76	46.334	9.9
S21	S2	SEB	Effector CD8+ T cells	7.505	10.505	1.36
S22	S2	SEB	Effector CD8+ T cells	7.46	13.494	1.71
S23	S2	SEB	Effector CD8+ T cells	7.36	9.55	2.04
S24	S2	SEB	Effector CD8+ T cells	3.975	4.391	3.045
S3	S2	SEB	Effector CD8+ T cells	7.46	5.285	0.385
S4	S2	SEB	Effector CD8+ T cells	14.035	10.702	0.015
S5	S2	SEB	Effector CD8+ T cells	27.145	22.7	5.855
S6	S2	SEB	Effector CD8+ T cells	13.235	17.175	6.17
S7	S2	SEB	Effector CD8+ T cells	13.035	15.1815	6.1255
S8	S2	SEB	Effector CD8+ T cells	0	0.505	0.26
S9	S2	SEB	Effector CD8+ T cells	14.58	13.055	2.985
