# Supplementary material for: Selective loss of CD107a TIGIT+ memory HIV-1-specific CD8+ T cells in PLWH over a decade of ART
Source: eLife. 2023 Sep 19;12:e83737. doi: 10.7554/eLife.83737 (PMC10508883; doi:10.7554/eLife.83737)
Supplement: Figure 4—source data 1. [file elife-83737-fig4-data1.xlsx]

## Sheet: Single cell data figure 4
fcs_file,"CD45RA BV785","CD39 FITC","LAG3 PE","CCR7 PECF594","CD27 BV605","PD1 BV421","TIM3 A647","TIGIT","CD107a PECY5","IL2 BV650","IFN BV711","sample","tSNE_V1","tSNE_V2","louvain"
export_early_B3_B03_CD8 _2020-06-16,3453.32,208.936,144.096,5886.04,1749.98,65.5142,28.3687,58.8003,100.706,3208.17,99.4381,FALSE,5.08502314630979,-21.9450329179566,"6"
export_early_B3_B03_CD8 _2020-06-16,-131.97,153.182,348.918,185.738,175.548,519.449,13.3601,1745.45,32.0142,885.524,945.103,TRUE,-24.013871108679,26.5239304349251,"3"
export_early_B3_B03_CD8 _2020-06-16,613.149,-21.6057,-153.609,76.2316,308.497,198.62,-146.95,16790,6634.03,285.602,351.394,FALSE,21.3659370490098,42.8648792475459,"28"
export_early_B3_B03_CD8 _2020-06-16,24.6018,116.871,-94.1838,-17.0763,1531.05,547.283,241.508,7170.05,8422.86,316.432,313.796,FALSE,11.0705858800238,42.5170092398766,"28"
export_early_B3_B03_CD8 _2020-06-16,673.069,95.2656,432.476,122.976,324.572,358.649,29.4492,17453.8,-13.5964,1442.75,969.585,FALSE,29.5204279876539,31.4161036754324,"19"
export_early_B3_B03_CD8 _2020-06-16,3905.8,177.051,454.153,525.79,-62.2786,382.878,57.8978,20000.9,646.507,77.2327,114.287,FALSE,40.2468569653083,20.8935485374276,"29"
export_early_B3_B03_CD8 _2020-06-16,1164.06,126.866,725.182,106.179,165.436,42.9495,45.5774,14355.3,3957.87,292.148,72.9405,FALSE,20.2662388511053,34.7441699656965,"28"
export_early_B3_B03_CD8 _2020-06-16,207.205,273.594,142.72,302.445,1119.48,565.119,66.7317,10383.6,424.503,503.961,3566.77,TRUE,-3.17751056208356,36.6285875335013,"28"
export_early_B3_B03_CD8 _2020-06-16,-234.819,125.613,154.118,59.2352,656.796,625.378,0.712515,9362.85,1727.19,303.892,1481.84,TRUE,10.1288777732343,26.8262536041407,"28"
export_early_B3_B03_CD8 _2020-06-16,-54.0024,114.578,213.511,467.746,242.801,278.384,33.7827,12888.6,115.785,21.0171,1130.87,FALSE,24.6936503481326,27.0702201799318,"29"
export_early_B3_B03_CD8 _2020-06-16,16845.7,107.236,132.849,2481.51,1657.68,-326.267,290.511,621.825,179.464,1000.47,205.577,FALSE,47.3574461163238,-1.77249819819249,"1"
export_early_B3_B03_CD8 _2020-06-16,1675.43,26.4525,250.072,3271.93,1429.93,96.4675,76.2302,-45.0769,663.034,164.864,203.543,FALSE,-7.99556648056214,-19.1446072745699,"9"
export_early_B3_B03_CD8 _2020-06-16,1535.8,87.2812,30.0204,178.256,139.678,-45.8628,-111.21,1883.25,4080.45,768.955,9195.07,FALSE,-7.3214134474669,47.7507902028714,"27"
export_early_B3_B03_CD8 _2020-06-16,612.134,109.753,191.368,70.4841,817.837,1043.14,51.7038,3065.29,557.217,171.857,-29.8436,FALSE,-10.2747971791792,15.936855554778,"3"
export_early_B3_B03_CD8 _2020-06-16,-212.686,82.2756,540.136,88.6101,-34.7587,61.1913,-53.4159,14920.3,102.226,1118.89,1004.81,FALSE,25.8616506320026,26.3933865860623,"29"
export_early_B3_B03_CD8 _2020-06-16,648.483,149.954,356.331,389.967,241.406,331.085,122.42,14366.3,1699.36,353.002,604.967,FALSE,23.3368093369507,30.8149509033778,"19"
export_early_B3_B03_CD8 _2020-06-16,205.303,13.3425,228.092,227.757,1567.47,77.6334,26.6661,4.86969,100.345,2241.72,17.9162,FALSE,-21.1529065937219,-8.35249306988682,"14"
export_early_B3_B03_CD8 _2020-06-16,3416.4,112.21,137.881,4044.02,1790.1,57.689,-86.3886,-220.269,122.01,902.618,-207.432,FALSE,6.91942930186916,-24.3301359008676,"6"
export_early_B3_B03_CD8 _2020-06-16,2203.95,91.1142,152.124,85.1651,330.435,335.537,98.7763,6584.25,1153.99,85.5419,134.005,TRUE,22.2517977034013,9.39784164748641,"10"
export_early_B3_B03_CD8 _2020-06-16,228.427,139.8,126.775,38.7619,747.509,46.1159,110.53,118.3,85.1042,-11.6635,1416.26,FALSE,-24.8859418689826,18.745293776772,"17"
export_early_B3_B03_CD8 _2020-06-16,5292.28,212.349,643.143,2364.86,1428.64,-26.6351,37.1294,616.219,167.761,3549.44,659.6,FALSE,19.36794135798,-16.9222467040911,"1"
export_early_B3_B03_CD8 _2020-06-16,3842.09,74.1269,66.9255,4819.53,1955.67,68.9534,-71.4948,601.406,1362.41,-324.546,248.749,FALSE,10.1205978138667,-27.6656870375613,"9"
export_early_B3_B03_CD8 _2020-06-16,924.462,880.846,675.515,236.851,1114.28,119.173,574.007,26166.4,2599.64,95.4797,204.169,FALSE,33.1995129532561,33.5012617609002,"19"
export_early_B3_B03_CD8 _2020-06-16,1994.8,330.807,426.637,330.008,9.20299,27.7767,-53.3476,10548.1,0.81336,1888.94,466.342,FALSE,32.3043495367031,12.5553051345338,"29"
export_early_B3_B03_CD8 _2020-06-16,1400.62,-7.97386,343.208,117.953,277.667,548.236,-22.5045,22598.7,328.298,287.996,752.508,FALSE,32.2773265146417,33.090836102143,"19"
export_early_B3_B03_CD8 _2020-06-16,-161.53,253.607,76.8665,156.041,137.322,383.814,225.509,775.34,3084.11,408.901,2662.1,TRUE,-12.4316432661104,41.4163690663416,"27"
export_early_B3_B03_CD8 _2020-06-16,212.249,129.781,232.909,418.522,474.235,43.9038,-34.5526,2667.37,806.621,-60.8658,42.952,FALSE,-17.2330687475343,11.3105093658626,"5"
export_early_B3_B03_CD8 _2020-06-16,5591.89,101.193,80.2445,8051.34,2208.71,-89.2474,-137.026,-478.778,701.013,273.285,166.256,FALSE,23.519851652579,-27.0097883653792,"1"
export_early_B3_B03_CD8 _2020-06-16,221.972,76.6068,85.3482,70.2055,114.121,692.997,77.5608,188.457,36.1432,709.737,868.986,FALSE,-28.5522672717948,20.8276473327043,"3"
export_early_B3_B03_CD8 _2020-06-16,424.484,160.844,131.801,294.32,945.109,109.934,-45.2904,-96.1722,848.293,130.585,130.514,FALSE,-32.3010572138894,-0.744076281682952,"5"
export_early_B3_B03_CD8 _2020-06-16,3078.06,65.2695,177.459,2440.75,1734.07,-25.063,-5.37615,399.559,-14.6105,927.512,386.35,FALSE,5.6319828834996,-19.6343668361621,"6"
export_early_B3_B03_CD8 _2020-06-16,663.235,101.909,-47.2184,315.408,787.055,25.0095,146.967,-80.2629,3356.39,-18.9112,1419.43,TRUE,-11.5237766388645,40.1912527035858,"27"
export_early_B3_B03_CD8 _2020-06-16,-212.526,251.974,660.395,608.617,664.131,715.155,-0.483518,10768.4,2874.05,152.392,974.385,FALSE,18.6160741667019,27.876820750214,"28"
export_early_B3_B03_CD8 _2020-06-16,1179.46,96.9169,48.2706,1067.15,1239.63,-159.797,131.943,-436.206,1878.55,37.8071,20177.5,FALSE,-5.97766640865652,56.0941576253181,"20"
export_early_B3_B03_CD8 _2020-06-16,-280.807,128.071,114.803,234.624,592.35,979.193,-41.2611,12568.8,1665.94,76.7942,192.016,FALSE,23.8909375624569,25.3612448521462,"28"
export_early_B3_B03_CD8 _2020-06-16,1714.35,132.173,123.746,89.8977,187.256,-17.1813,50.2265,16558.8,1485.56,247.248,811.282,FALSE,31.1333477436189,26.6193095229683,"29"
export_early_B3_B03_CD8 _2020-06-16,5559.72,453.609,1400.52,3541.19,2675.32,723.27,52.5875,-276.409,596.152,546.969,317.891,FALSE,23.7533097645221,-19.1097073953122,"1"
export_early_B3_B03_CD8 _2020-06-16,2232.61,469.101,1896.93,1243.88,578.513,1419.12,173.096,10437.6,179.532,949.151,421.419,FALSE,22.0918414791279,22.3014522604557,"8"
export_early_B3_B03_CD8 _2020-06-16,4351.48,134.394,324.506,212.139,583.071,122.816,27.0162,18499.8,904.97,-215.698,69.8121,FALSE,39.9998670145586,18.6777423579346,"29"
export_early_B3_B03_CD8 _2020-06-16,229.092,11.8384,110.51,91.2714,969.57,440.941,-27.5213,25599.5,5412.73,102.299,1051.06,FALSE,31.6220554077999,38.5852408411595,"28"
export_early_B3_B03_CD8 _2020-06-16,-147.322,21.701,-48.4291,72.428,349.344,194.462,-17.4641,425.962,5568.11,303.528,61.2763,FALSE,-23.394594486089,28.1939126380946,"27"
export_early_B3_B03_CD8 _2020-06-16,1955.99,98.0307,156.466,3216.06,1448.01,-20.3761,-72.73,119.466,134.722,1066.18,125.312,FALSE,0.897614665780261,-16.6774533331141,"6"
export_early_B3_B03_CD8 _2020-06-16,565.586,186.589,528.869,775.382,1631.04,135.093,2.67135,1333.52,946.27,154.885,209.064,FALSE,-31.0674689706679,-5.64783889595519,"5"
export_early_B3_B03_CD8 _2020-06-16,-40.623,99.6669,113.478,106.698,516.892,65.73,-74.4504,-84.4402,1246.3,303.677,209.864,FALSE,-34.5371430418695,3.87372709284864,"5"
export_early_B3_B03_CD8 _2020-06-16,2915.62,109.337,90.1914,8457.34,2415.25,-18.7221,-128.183,-67.0415,556.205,342.3,174.381,FALSE,4.86052094299042,-36.1911191381605,"6"
export_early_B3_B03_CD8 _2020-06-16,700.789,205.945,162.126,302.662,505.948,320.165,106.582,20067.8,4835.39,147.519,1999.69,FALSE,27.3126754199398,36.9863691476245,"28"
export_early_B3_B03_CD8 _2020-06-16,3424.26,2.55235,213.644,3017.9,1341.07,-4.52924,-52.019,280.722,550.223,125.801,150.315,TRUE,5.64729514338192,-21.5363907021417,"9"
export_early_B3_B03_CD8 _2020-06-16,2579.42,228.182,749.257,233.993,165.207,30.619,-86.0529,9999.72,1778.79,30.5731,136.484,FALSE,35.3644382739419,12.6906024638061,"10"
export_early_B3_B03_CD8 _2020-06-16,2.89115,191.709,-226.88,192.761,798.803,173.47,-16.6337,13128.7,10262.1,47.826,712.347,FALSE,16.5393533494474,45.8424063529142,"28"
export_early_B3_B03_CD8 _2020-06-16,-195.504,40.1458,150.098,115.883,150.019,133.519,28.675,1693.61,33.8655,1026.76,230.48,FALSE,-21.1620198117893,9.38643866107884,"17"
export_early_B3_B03_CD8 _2020-06-16,665.456,71.4292,279.229,1914,1632.95,142.242,-73.3739,580.098,67.2463,1498.3,159.319,FALSE,-14.8811921762275,-13.4881601811259,"6"
export_early_B3_B03_CD8 _2020-06-16,283.543,172.339,-52.5589,130.712,433.208,256.732,218.368,4431.15,7117.26,77.1892,2476.2,FALSE,7.31495568388643,42.2741752602642,"28"
export_early_B3_B03_CD8 _2020-06-16,7399.17,36.6364,222.296,75.991,352.028,260.482,136.946,18104.8,594.286,-137.967,102.205,FALSE,40.935877570769,13.3463605130201,"21"
export_early_B3_B03_CD8 _2020-06-16,-89.3226,57.9667,53.9116,21.3145,784.784,553.482,260.143,4750.7,2309.34,-187.952,735.64,FALSE,-3.1370845548691,25.7418140082612,"28"
export_early_B3_B03_CD8 _2020-06-16,-75.6892,260.473,-106.158,260.716,319.887,171.176,-52.7546,21964.1,6863.25,422.648,4803.75,TRUE,22.1831624437687,39.3038087903496,"28"
export_early_B3_B03_CD8 _2020-06-16,803.734,55.8317,230.238,-127.327,1904.54,159.463,-879.822,3756.33,148.472,52525.3,-228.513,FALSE,27.1545516660719,-4.81091277706059,"23"
export_early_B3_B03_CD8 _2020-06-16,11.4307,152.11,131.97,366.808,1144.93,205.021,11.8919,3737.82,15.3693,1260.46,882.633,FALSE,-12.3501078419107,14.4726509086924,"4"
export_early_B3_B03_CD8 _2020-06-16,276.053,64.0858,221.428,208.482,1025.86,260.273,38.9908,-138.692,2693.19,433.661,-88.3882,TRUE,-43.6862898937622,13.4531837027542,"5"
export_early_B3_B03_CD8 _2020-06-16,345.734,56.5944,173.601,85.2152,443.229,701.672,47.4692,-487.552,1518.16,237.65,429.967,FALSE,-38.2606760823296,12.6796887286293,"5"
export_early_B3_B03_CD8 _2020-06-16,1090.7,95.9903,294.189,100.659,-48.2181,20.3952,111.803,17171.9,22.3669,1033.71,887.663,FALSE,29.8962209421238,29.6153603347185,"19"
export_early_B3_B03_CD8 _2020-06-16,503.113,927.798,296.076,82.9376,163.262,273.742,-236.24,875.681,76.638,21222.8,136.46,FALSE,22.1703475416582,-5.39361530825466,"15"
export_early_B3_B03_CD8 _2020-06-16,501.163,940.325,236548,190177,38383.1,-218.358,-3995.31,-13515.6,22416.7,-14802.6,-100.249,FALSE,-9.20196060558196,-92.2713184483412,"11"
export_early_B3_B03_CD8 _2020-06-16,3052.59,203.217,293.981,7231.37,2097.51,128.591,-68.8211,-632.832,638.378,330.882,51.648,FALSE,3.93963679914145,-30.2355849782319,"6"
export_early_B3_B03_CD8 _2020-06-16,9843.17,500.611,1605.84,4415.48,1671.31,152.777,-73.5996,1498.16,537.392,4418.38,1584.03,FALSE,35.4843142097548,-13.1168351487047,"1"
export_early_B3_B03_CD8 _2020-06-16,965.768,105.082,196.072,1400.92,1886.81,173.646,24.062,3251.45,1445.71,231.868,301.491,FALSE,-11.8310287639707,7.8072514405783,"4"
export_early_B3_B03_CD8 _2020-06-16,8653.8,108.572,271.815,66.4883,111.538,-33.737,-103.361,16488.8,3050,378.734,132.348,FALSE,42.6451609790532,9.90703028598441,"21"
export_early_B3_B03_CD8 _2020-06-16,7859.65,66.0027,195591,5334.11,1675.14,1.56447,-103.354,1175.34,1134.55,270.127,70.4968,TRUE,8.11024453810148,2.06638216302181,"11"
export_early_B3_B03_CD8 _2020-06-16,77.0267,255.018,331.039,91.9216,234.581,68.8073,-38.0892,3566.42,734.325,14.9976,2103.96,FALSE,-15.1805097176965,31.1592774108147,"25"
export_early_B3_B03_CD8 _2020-06-16,4631.85,126.19,230.908,2814.04,1419.54,16.5122,27.7247,84.9533,-197.877,1459.3,130.465,FALSE,14.3084772789233,-19.9542550418034,"1"
export_early_B3_B03_CD8 _2020-06-16,266.244,61.351,111.53,409.772,1103.34,98.7761,-248.657,4202.67,160.33,23579.8,-123.117,FALSE,24.4473215412589,-6.82313937338739,"15"
export_early_B3_B03_CD8 _2020-06-16,70.5579,380.476,571.208,150.769,620.533,136.899,60.8872,18436.5,554.843,440.561,229.5,FALSE,29.3193072979702,31.3903752861315,"19"
export_early_B3_B03_CD8 _2020-06-16,1488.08,-39.3645,12.6197,3129.29,1659.97,36.8913,-77.4514,-380.062,727.219,-3.94692,65.8745,FALSE,-8.20876696434083,-21.8431670775219,"9"
export_early_B3_B03_CD8 _2020-06-16,4744.7,721.265,-14.233,5554.55,1349.26,6.06671,-15.4634,-314.11,2268.53,26.054,280.069,FALSE,15.7870408091746,-24.6688739833739,"1"
export_early_B3_B03_CD8 _2020-06-16,4374.04,107.115,807.747,-23.5184,860.281,-37.7093,20.5539,7748.74,924.267,-56.0561,252.07,TRUE,32.2649683188776,6.71055554274136,"29"
export_early_B3_B03_CD8 _2020-06-16,261.14,130.92,233.452,990.101,1178.98,268.634,-44.2344,15375.4,1671.52,-25.4718,109.034,FALSE,25.0171776056282,30.8316812373257,"19"
export_early_B3_B03_CD8 _2020-06-16,-237.066,105.62,440.647,226.023,-33.1972,1218.75,38.4799,8958.85,327.247,251.913,1332.89,FALSE,13.0092212553836,23.4881923551213,"8"
export_early_B3_B03_CD8 _2020-06-16,2184.87,511.51,1367.38,4341.91,2684.85,821.308,226.627,236.28,299.565,1028.15,417.302,FALSE,-7.56526911528171,-24.2456690523429,"11"
export_early_B3_B03_CD8 _2020-06-16,483.287,129.097,253.538,155.113,579.827,2272.31,65.3533,18212.2,49.9939,2099.58,1012.73,FALSE,26.0694137950592,29.7375522033881,"19"
export_early_B3_B03_CD8 _2020-06-16,-248.586,131.095,147.355,60.8656,781.306,201.426,80.961,-9.27695,135.898,396.889,874.654,FALSE,-26.516225275903,8.88433502683595,"17"
export_early_B3_B03_CD8 _2020-06-16,911.443,6.86472,186.826,2829.5,527.994,-64.1881,43.7652,-54.4711,591.625,-84.4013,123.074,FALSE,-19.2257055734896,-8.20052463720011,"5"
export_early_B3_B03_CD8 _2020-06-16,102.751,202.448,310.364,319.827,1191.25,276.156,-10.0013,2409.67,93.3866,1702.01,285.094,FALSE,-15.6169541556093,2.69944955742657,"4"
export_early_B3_B03_CD8 _2020-06-16,3534.45,140.553,153.765,62.6748,345.248,-0.0955919,151.203,3966.51,14.7193,305.814,1365.51,TRUE,26.18796578365,4.72121307440515,"9"
export_early_B3_B03_CD8 _2020-06-16,939.025,150.315,125.927,52.152,5384.99,-292.992,873.015,6619.28,493.106,150040,-1992.06,FALSE,29.1206999461424,-2.08059772557883,"23"
export_early_B3_B03_CD8 _2020-06-16,161.517,152.95,210.312,45.665,388.56,101.93,40.8798,2904.75,852.365,512.964,811.238,FALSE,-19.0643016686584,17.1792122126062,"5"
export_early_B3_B03_CD8 _2020-06-16,342.428,1145.68,479.296,943.01,3291.72,3387.52,175.407,24837.9,186.376,440.935,1915.43,FALSE,32.317517151438,29.2269245455971,"19"
export_early_B3_B03_CD8 _2020-06-16,5781.14,102.543,165.244,6418.76,1447.67,-147.768,-29.6881,264.029,91.4566,2424.01,2040.59,FALSE,20.2837028797926,-22.6665972056937,"1"
export_early_B3_B03_CD8 _2020-06-16,28.5321,169.945,68.6437,106.388,536.614,237.2,-66.7112,236.562,1179.71,264.417,1543.9,FALSE,-31.7776869792745,23.3302326064303,"27"
export_early_B3_B03_CD8 _2020-06-16,3191.2,109.653,107.258,2833.2,1550.68,75.3269,-130.855,1726.35,37.3592,8814.62,13131.9,FALSE,-10.1665191235466,47.6141204063807,"22"
export_early_B3_B03_CD8 _2020-06-16,4209.42,124.212,372.618,2197.26,2392.61,-29.9634,-124.904,484.747,193.203,1284.86,90.7385,FALSE,13.4824894314437,-28.5955358953543,"12"
export_early_B3_B03_CD8 _2020-06-16,3733.31,140.468,318.757,2524.16,2335.45,327.707,-8.76135,14813.2,225.994,5815.72,356.511,FALSE,34.1568533801763,21.4518856389444,"29"
export_early_B3_B03_CD8 _2020-06-16,2830.29,164.315,63.7298,250.052,495.797,-256.782,46.5249,-243.486,851.504,1089.59,29023.4,FALSE,-4.17421279160499,60.8492983616356,"20"
export_early_B3_B03_CD8 _2020-06-16,-34.3796,78.643,206.544,85.8215,-115.802,458.353,33.9045,1650.9,-99.4425,448.787,1708.7,FALSE,-21.6997230082287,30.1369474580135,"3"
export_early_B3_B03_CD8 _2020-06-16,2126.38,242.331,527.515,4114.3,4294.27,153.151,364.533,505.485,-11.0402,1389.32,280.64,FALSE,-7.22498794374687,-44.3466860682139,"14"
export_early_B3_B03_CD8 _2020-06-16,394.191,185.428,400.967,470.243,1615.36,134.373,-114.807,117.371,642.687,134.59,324.319,FALSE,-30.438913334206,-9.12536303258023,"5"
export_early_B3_B03_CD8 _2020-06-16,1564.55,182.891,343.984,316.252,477.159,460.894,85.8002,23142.4,1036.88,14.5874,154.116,FALSE,32.0739065546155,32.9775622562339,"19"
export_early_B3_B03_CD8 _2020-06-16,158.868,524.401,470.586,612.03,2997.07,3589.35,16.9296,10351,26.7515,1746.82,365.656,FALSE,18.387277176459,14.9684207835634,"8"
export_early_B3_B03_CD8 _2020-06-16,362.403,191.183,61.1808,184.947,819.578,951.588,-2.81238,13083.9,3178.92,-53.7595,1073.01,TRUE,18.1747683623358,30.8045066329072,"28"
export_early_B3_B03_CD8 _2020-06-16,1305.35,192.191,417.685,876.395,417.705,1295.93,-39.5047,216.914,652.134,1079.72,420.329,TRUE,-31.6851848006445,15.7020200037856,"3"
export_early_B3_B03_CD8 _2020-06-16,139.653,92.542,172.391,168.186,856.769,494.33,-75.4248,3909.09,-90.8663,7214.5,20.7257,TRUE,13.2960438081304,0.975475466796577,"15"
export_early_B3_B03_CD8 _2020-06-16,8121.83,70.9987,116.676,258.962,178.127,-78.171,-14.1092,4404.6,1904.6,47.5761,134.17,FALSE,40.4467220701817,-0.56962689313253,"9"
export_early_B3_B03_CD8 _2020-06-16,-452.852,147.21,-84.9184,667.606,925.02,2990.14,-225.028,17305.1,7271.87,-109.413,1580.51,TRUE,22.4997150320855,37.7683711028484,"28"
export_early_B3_B03_CD8 _2020-06-16,64.3733,150.965,-113.091,191.584,943.613,338.92,101.756,-1282.43,4008.93,-78.0357,344.095,TRUE,-44.380416765792,15.3608251919633,"27"
export_early_B3_B03_CD8 _2020-06-16,-72.6203,35.2939,313.453,50.1092,-51.3616,164.202,-10.9583,2277.09,21.1522,273.561,1294.77,FALSE,-17.8125629329723,25.0058772358632,"17"
export_early_B3_B03_CD8 _2020-06-16,3005.02,20.6999,293.59,2908.2,2168.55,66.775,9.89605,2.81259,78.6442,1402.55,81.561,FALSE,4.31112862001385,-25.086828919232,"6"
export_early_B3_B03_CD8 _2020-06-16,1755.44,322.381,602.75,409.357,3811.46,375.084,50.3592,7184.46,123.14,1693.63,284.583,FALSE,10.8578089564797,12.4563406715565,"4"
export_early_B3_B03_CD8 _2020-06-16,2254.92,218.087,767.254,181.986,284.788,75.1854,15.9178,4046.75,95.6385,1449.41,329.52,FALSE,12.2786336016009,8.15843766449373,"9"
export_early_B3_B03_CD8 _2020-06-16,56.126,171.43,139317,3145.23,1941.19,177.165,-213.154,3.42434,453.317,5369.66,221.629,FALSE,9.22938089817299,3.69304126938365,"11"
export_early_B3_B03_CD8 _2020-06-16,1838.2,48.3826,149.187,2505.74,893.27,66.9526,157.591,398.347,-31.2942,152.263,1027.05,FALSE,-6.44527594268489,-9.96785628224313,"6"
export_early_B3_B03_CD8 _2020-06-16,7764.52,110.574,312.003,3000.2,2118.99,32.4175,-237.254,660.117,-117.429,10082.7,9095.92,TRUE,4.81164624025697,63.3990074430838,"22"
export_early_B3_B03_CD8 _2020-06-16,5032.08,283.827,604.477,4311.76,1878.21,74.3648,-75.8276,545.762,222.554,1447.94,423.759,FALSE,18.9439311108221,-21.4024607366591,"1"
export_early_B3_B03_CD8 _2020-06-16,135.565,57.5129,60.7182,-36.3032,474.593,77.3163,6.97401,9358.33,2949.2,-240.14,540.948,FALSE,13.707354269641,30.4785239271387,"10"
export_early_B3_B03_CD8 _2020-06-16,410.378,544.061,364.17,147.206,1157.38,599.482,107.568,23993.2,1870.71,286.131,1401.54,TRUE,31.4514634101809,32.6505619919765,"19"
export_early_B3_B03_CD8 _2020-06-16,310.437,206.812,620.497,122.075,142.185,401.664,-42.831,7164.94,136.246,2089.85,2442.93,FALSE,1.49068154190955,29.3457970090627,"2"
export_early_B3_B03_CD8 _2020-06-16,-54.2433,121.621,108.875,168.959,558.688,785.583,-16.3222,8449.13,2026.36,388.58,1969.24,FALSE,9.77880447739101,29.4986679749536,"28"
export_early_B3_B03_CD8 _2020-06-16,549.889,438.534,192.47,364.724,642.569,1143.16,211.732,19626.4,1729.36,-61.2949,294.393,FALSE,32.0938699305936,32.4997078656165,"19"
export_early_B3_B03_CD8 _2020-06-16,6188.93,183.024,430.518,62.378,386.395,-103.559,32.5966,11007.8,40.3817,2232.38,1810.71,TRUE,35.8959967484814,9.83770515604138,"29"
export_early_B3_B03_CD8 _2020-06-16,463.128,65.9648,461.102,167.137,355.125,1778.14,34.6706,43.9751,-54.6423,968.98,121.007,FALSE,-9.36692816137792,13.6678914300253,"3"
export_early_B3_B03_CD8 _2020-06-16,1926.96,235.722,243.209,4081.02,1699.46,64.9111,61.9908,-360.876,1094.85,-23.4469,331.533,FALSE,-4.26366579715866,-22.3292054433679,"9"
export_early_B3_B03_CD8 _2020-06-16,3872.61,229.086,356.753,4413.67,2212.13,73.4185,-66.7253,283.133,379.16,1567.57,398.248,FALSE,9.02045407437834,-25.7823152277113,"6"
export_early_B3_B03_CD8 _2020-06-16,1691.67,156.728,114.627,1183.59,2340.22,158.908,-253.806,8436.07,-147.309,17349.2,-515.325,FALSE,17.4164018374243,-2.14600365968078,"15"
export_early_B3_B03_CD8 _2020-06-16,901.029,111.178,183.411,-97.8283,1033.46,47.9522,-666.542,3066.7,122.975,40290.5,2231.79,FALSE,28.1040078423439,-8.14776397408879,"23"
export_early_B3_B03_CD8 _2020-06-16,33.8486,116.382,1210.84,234.003,1322.46,1275.08,110.935,4987.27,609.171,443.414,217.973,FALSE,3.45661882991228,14.7928038344581,"3"
export_early_B3_B03_CD8 _2020-06-16,787.242,121.516,303.759,423.361,2489.37,840.236,-612.772,11144.1,148.496,31556.3,-534.378,FALSE,23.4201875507829,-5.21334803392039,"15"
export_early_B3_B03_CD8 _2020-06-16,6945.11,355.769,57.5789,3129.01,1486.46,97.0888,-91.0863,365.676,3334.72,243.751,246.423,TRUE,25.2256216532329,-14.4509025202442,"1"
export_early_B3_B03_CD8 _2020-06-16,255.416,196.429,85.372,437.417,278.004,1615.97,69.3291,1822.27,81.0905,457.113,3058.26,FALSE,-21.4848817961689,26.9714907644991,"3"
export_early_B3_B03_CD8 _2020-06-16,6283.78,10.442,142.129,3345.45,2190.19,-127.898,515.331,799.943,24.7524,1171.91,-113.7,FALSE,28.8131251183448,-19.3441236741544,"1"
export_early_B3_B03_CD8 _2020-06-16,352.581,158.291,337.378,96.2586,414.337,1248.92,68.0246,17615.3,576.87,128.106,164.859,FALSE,30.5035099288511,28.6294490515138,"8"
export_early_B3_B03_CD8 _2020-06-16,138.902,110.469,276.491,376.736,1688.88,238.677,-126.342,10143.2,160.545,13334,138.837,TRUE,14.4860222951254,2.59860657423886,"15"
export_early_B3_B03_CD8 _2020-06-16,168.305,183.833,47.2909,454.101,1410.22,433.636,-130.627,19307.6,2549.22,-19.2005,1180.66,FALSE,30.6988012643893,32.9519990632804,"28"
export_early_B3_B03_CD8 _2020-06-16,216.731,156.302,-157.236,114.379,765.448,831.984,90.913,18520.2,7576.85,-150.557,119.693,FALSE,23.4625926771124,41.2521413753991,"28"
export_early_B3_B03_CD8 _2020-06-16,30224.2,173.25,503.126,53.9707,341.059,-439.989,-30.9306,10145.5,11.6919,1070.29,1231.83,FALSE,47.4648226294534,-3.62592469487977,"21"
export_early_B3_B03_CD8 _2020-06-16,5975.75,195.654,110.796,2908.51,1640.37,-24.073,-37.2219,227.163,695.18,323.779,-21.1907,FALSE,27.1633705607685,-20.2736304710046,"1"
export_early_B3_B03_CD8 _2020-06-16,7409.02,1427.87,201.303,1962.43,612.47,78.473,-61.504,7968.32,959.074,434.134,437.397,FALSE,32.8871158945763,3.4287330363074,"29"
export_early_B3_B03_CD8 _2020-06-16,5093.94,95.3597,-61.6462,233.873,185.195,-53.7066,201.684,2494.06,4062.89,171.813,11354.6,TRUE,-8.40790598526279,54.322710504598,"24"
export_early_B3_B03_CD8 _2020-06-16,301.894,158.91,-7.29392,36.5346,433.379,272.749,-3.14104,2621.59,1968.93,-94.591,527.157,FALSE,-20.2876993754427,21.5144525324334,"5"
export_early_B3_B03_CD8 _2020-06-16,396.929,173.101,187.421,2110.09,2390.3,135.203,23.0471,-312.936,67.7316,177.386,743.754,FALSE,-21.1556166979476,-20.9764954765429,"6"
export_early_B3_B03_CD8 _2020-06-16,191.176,327.479,503.347,1575.41,3323.14,312.79,119.707,2884.58,-45.4704,1870.71,476.653,FALSE,-8.4017844359448,-9.78314277332133,"4"
export_early_B3_B03_CD8 _2020-06-16,-15.2144,211.662,316.256,47.1393,970.011,1726.95,445.415,15613.3,5291.65,441.884,1462.77,TRUE,21.0368219769282,36.1066997382533,"28"
export_early_B3_B03_CD8 _2020-06-16,192.956,222.527,182.05,349.343,1348.52,108.563,290.956,48.9266,431.027,621.355,13708.5,FALSE,-7.73350357613117,54.171896731545,"22"
export_early_B3_B03_CD8 _2020-06-16,-208.673,105.859,169.308,79.9934,113.48,265.241,48.9137,3286.64,928.346,323.911,5550.71,FALSE,-17.745488312774,40.5249943019689,"25"
export_early_B3_B03_CD8 _2020-06-16,2205.68,366.362,408.323,206.86,79.4858,45.1563,126.938,22279.5,2253.36,26.8381,239.25,FALSE,31.8888641410834,30.7205531141749,"29"
export_early_B3_B03_CD8 _2020-06-16,1198.54,140.205,-504.166,39.1956,95.6393,131.357,-646.681,4616.12,12793.2,350.012,6314.83,FALSE,7.39347625379972,49.4620148754543,"28"
export_early_B3_B03_CD8 _2020-06-16,-299.982,149.485,242.064,180.762,1065.44,1262.58,99.6472,14413.3,67.2162,100.487,1183.84,FALSE,25.5805709890261,26.1184297105188,"8"
export_early_B3_B03_CD8 _2020-06-16,76.2166,84.2535,725.721,173.559,1698.05,1037.85,-125.415,6680.59,4418.38,176.655,291.288,FALSE,8.89099197784838,30.0886085327341,"28"
export_early_B3_B03_CD8 _2020-06-16,-36.9998,329.227,188.925,118.566,522.222,462.821,-17.0003,11825.1,-5.2536,1208.27,1125.65,FALSE,22.6552837353371,26.6258433309124,"8"
export_early_B3_B03_CD8 _2020-06-16,7395.14,87.6891,36.8252,3080.52,1808.2,-52.9291,108.955,184.192,1015.83,201.17,446.894,TRUE,28.9203635998374,-17.2660231509795,"1"
export_early_B3_B03_CD8 _2020-06-16,1561.12,294.076,277.107,557.117,21.263,-0.987095,156.615,525.168,1013.35,200.83,31.4133,FALSE,-27.7577634652538,0.777806094911917,"5"
export_early_B3_B03_CD8 _2020-06-16,3821.27,284.449,484.793,5459.18,2363.42,65.0379,30.2702,195.708,387.028,1776.52,631.731,FALSE,7.6009836367171,-26.4799175969103,"6"
export_early_B3_B03_CD8 _2020-06-16,2270.18,154.638,234.484,2608.78,1585.37,75.2919,8.37128,99.4974,171.059,1093.72,206.132,FALSE,1.06838984210006,-17.795836030306,"6"
export_early_B3_B03_CD8 _2020-06-16,1619.24,111.665,571.128,393.393,-17.9439,151.205,134.167,10381.1,1103.67,193.647,192.185,TRUE,14.948824527687,26.3030393790247,"10"
export_early_B3_B03_CD8 _2020-06-16,2415.74,342.97,650.807,358.694,3673.99,360.122,75.2336,8319.22,151.438,1198.61,626.716,FALSE,19.4677205237014,14.5737470745179,"4"
export_early_B3_B03_CD8 _2020-06-16,352.481,1003.79,593.275,787.796,906.456,607.845,-102.681,37758.2,133.491,7209.28,122.708,TRUE,36.8615129617086,32.9112299546019,"19"
export_early_B3_B03_CD8 _2020-06-16,213.435,118.431,741.622,173.657,1563.59,1292.81,70.6577,2941.77,85.6668,314.396,805.885,FALSE,-3.93745926823074,15.6496366950897,"3"
export_early_B3_B03_CD8 _2020-06-16,1132.72,59.56,327.031,757.458,1283.77,102.521,-2.38769,3002.99,111.037,1044.31,287.678,FALSE,-8.02832467887508,3.22618654196706,"17"
export_early_B3_B03_CD8 _2020-06-16,2928.98,120.756,283.324,26.1979,603.571,581.137,19.1823,19660.7,-44.3839,2790.9,-8.52939,FALSE,42.9453644589269,24.4009738856187,"29"
export_early_B3_B03_CD8 _2020-06-16,1300.11,114.11,859.225,56.6317,418.748,58.3197,12.608,3894.05,6.11104,457.651,833.25,FALSE,-3.61216384948257,12.1198427868397,"2"
export_early_B3_B03_CD8 _2020-06-16,226.146,592.893,460.303,556.248,887.231,2241.17,99.2458,25808.7,777.566,11.8301,85.6842,FALSE,35.8768173382984,31.9865083466829,"19"
export_early_B3_B03_CD8 _2020-06-16,190.048,106.053,162.213,711.148,1235.7,177.495,74.5323,342.456,51.4949,2271.76,1400.42,FALSE,-16.2256653056469,-4.96973444716623,"17"
export_early_B3_B03_CD8 _2020-06-16,313.788,71.9282,186.608,1367.14,1849.48,183.042,-134.503,1139.09,77.9379,3419.46,21.8476,FALSE,-8.16647147757293,-8.7032092777584,"15"
export_early_B3_B03_CD8 _2020-06-16,510.74,106.419,-53.4464,297.766,1720.66,124.391,-22.0355,-1.55444,656.422,-27.8738,147.261,FALSE,-29.9237176465852,-9.69916739051093,"5"
export_early_B3_B03_CD8 _2020-06-16,3197.23,79.96,159.318,2519.07,1903.81,81.6086,131.558,156.402,881.393,-28.4207,248.64,FALSE,4.82661224820738,-22.3024197651881,"9"
export_early_B3_B03_CD8 _2020-06-16,1013.74,113.167,635.172,1011.62,1692.7,180.594,-10.7463,7781.46,88.5181,2178.14,1575.32,FALSE,12.8933806288096,20.309930983375,"8"
export_early_B3_B03_CD8 _2020-06-16,3962.11,183.14,94.7943,2448.29,2857.28,81.4302,-4.36839,-159.307,584.743,504.061,40.9807,TRUE,9.38090609407666,-29.5570699126204,"12"
export_early_B3_B03_CD8 _2020-06-16,222.683,109.075,153.886,3402.28,1333.98,154.343,4.65036,8409.43,192.351,1243.54,187.841,FALSE,9.52298638548275,14.9327133717506,"8"
export_early_B3_B03_CD8 _2020-06-16,1105.31,75.4426,390.498,98.0228,525.068,112.737,-55.5292,9282.46,48.9462,1038.68,271.266,FALSE,23.0867710972116,18.1700194762256,"2"
export_early_B3_B03_CD8 _2020-06-16,1107.41,184.48,401.498,1476,408.459,191.298,43.4094,2083.09,610.001,164.367,202.689,FALSE,-22.8591092584459,9.16999908301356,"5"
export_early_B3_B03_CD8 _2020-06-16,2591.26,614.602,159.159,2935.05,1485.48,181.948,-70.805,-705.169,1395.11,224.735,117.454,FALSE,-0.497035300723661,-20.8113543798896,"9"
export_early_B3_B03_CD8 _2020-06-16,206.225,147.454,230.884,119.621,-93.7383,8.69648,-37.2926,6434.85,54.3538,878.858,-120.704,FALSE,7.44191271678449,15.5307435055924,"2"
export_early_B3_B03_CD8 _2020-06-16,27.8893,70.2102,263.274,131.84,108.71,452.956,74.4498,126.765,21.1054,394.84,6385.52,FALSE,-20.7125963624274,47.6285536286895,"22"
export_early_B3_B03_CD8 _2020-06-16,5595.32,140.185,231.899,9470.18,3669.76,-18.4142,-33.1625,415.491,632.551,-21.2196,143.227,FALSE,27.6249812007594,-38.3057396049829,"18"
export_early_B3_B03_CD8 _2020-06-16,1349.14,212.29,693.253,304.944,538.945,504.545,27.9711,1134.97,207.335,3132.83,397.666,TRUE,-19.0463859691847,-1.97312323301683,"17"
export_early_B3_B03_CD8 _2020-06-16,98.1631,169.823,315.518,345.548,667.415,177.536,-24.6246,13468.3,6.86265,4369.43,-29.5358,FALSE,22.1455837724429,19.8568103931093,"29"
export_early_B3_B03_CD8 _2020-06-16,-114.513,333.728,599.858,477.718,1214.66,373.645,-84.7189,14881.6,100.4,1996.52,1738.6,FALSE,25.3640922764685,30.0424061852203,"19"
export_early_B3_B03_CD8 _2020-06-16,-107.204,64.0265,144.557,159.728,96.3864,801.319,-63.6349,7544.08,86.8571,439.926,1036.48,FALSE,10.4868690036142,22.9134813123465,"8"
export_early_B3_B03_CD8 _2020-06-16,2741.78,114.224,126.313,3715.96,1793.11,42.7976,50.3945,474.645,1028.49,-215.472,105.329,FALSE,0.573716153521068,-24.5396207671768,"9"
export_early_B3_B03_CD8 _2020-06-16,-41.909,122.4,523.675,92.9352,536.223,-59.8927,-75.3207,13714.6,117.837,6664.82,5677.22,FALSE,15.6662877071579,30.5199245894516,"22"
export_early_B3_B03_CD8 _2020-06-16,7722.73,129.328,13.4457,4119.65,4616.21,-399.757,-791.986,-119.51,410.028,175635,-1733.68,FALSE,31.6895428526956,-10.0918608119217,"23"
export_early_B3_B03_CD8 _2020-06-16,308.469,82.4036,260.297,114.914,854.879,239.582,-16.5974,6553.12,632.617,146.674,5186.58,FALSE,-6.33431319490935,36.177390034114,"25"
export_early_B3_B03_CD8 _2020-06-16,638.121,116.745,137.176,44.7255,957.11,1172.11,137.738,6798.09,2028.26,154.504,581.482,FALSE,8.80309965468824,22.5019246166189,"3"
export_early_B3_B03_CD8 _2020-06-16,572.407,402.881,395.099,654.411,339.831,560.293,186.002,22933.3,1249.36,186.555,3687.6,FALSE,29.3059546198277,30.8303163644506,"19"
export_early_B3_B03_CD8 _2020-06-16,5549.61,98.7065,303.052,3212.47,1763.58,117.897,-9.78723,-17.272,391.991,259.743,1067.49,FALSE,24.2680423737649,-19.5694303781642,"1"
export_early_B3_B03_CD8 _2020-06-16,243.896,122.336,-4.55824,65.1737,271.991,275.866,-51.576,265.973,4396.96,648.34,10151.9,FALSE,-6.46363092784717,48.1292492563225,"27"
export_early_B3_B03_CD8 _2020-06-16,3334.27,126.244,268.35,5743.65,2264.17,-20.4895,47.1569,52.604,613.209,-22.4039,46.1256,FALSE,4.9684342350371,-30.1637240547586,"6"
export_early_B3_B03_CD8 _2020-06-16,17.9207,174.773,-165.362,-7.67366,620.183,266.618,-45.8419,-8.65568,6216.63,191.651,5050.91,FALSE,-4.24399652300459,46.0538572183844,"27"
export_early_B3_B03_CD8 _2020-06-16,283.57,81.864,45.4358,261.042,1626.49,1017.68,-87.1884,9560.79,4635.71,27.438,647.041,FALSE,16.5186168354637,33.6535088384547,"28"
export_early_B3_B03_CD8 _2020-06-16,4820.62,83.9167,5786.62,3171.03,6524.47,1273.31,87.413,273.434,206.725,1253.17,551.767,FALSE,7.24696129184107,-30.3875437077317,"11"
export_early_B3_B03_CD8 _2020-06-16,2347.53,87.7863,71.3105,556.549,950.543,54.2445,70.2457,233.825,-15.4119,912.951,491.407,FALSE,-2.24556023478941,-8.99315237154194,"6"
export_early_B3_B03_CD8 _2020-06-16,7070.89,205.095,524.093,2315.04,1905.17,46.207,14.4796,30.3898,117.576,1796.63,508.196,FALSE,33.2764767899404,-19.3151059739568,"1"
export_early_B3_B03_CD8 _2020-06-16,460.544,69.7323,48.3382,593.425,724.817,26.6964,16.0745,-163.125,643.568,363.747,24.21,FALSE,-29.2899650256645,-1.0676321876684,"5"
export_early_B3_B03_CD8 _2020-06-16,2708.59,34.924,233.465,49.7407,218.236,96.0158,58.9723,737.637,46.6534,2049.64,155.016,FALSE,-0.636010780944536,-3.82345398602797,"9"
export_early_B3_B03_CD8 _2020-06-16,5148.9,164.367,199.642,3526.92,1768.28,141.808,8.1453,864.507,92.1119,667.863,947.599,FALSE,21.2707103106302,-20.3204604224964,"1"
export_early_B3_B03_CD8 _2020-06-16,-1533.79,2151.41,218627,164379,163217,-1120.8,-22269.6,-30203.2,121334,-68614.1,-265.717,TRUE,-5.80611217467768,-59.7600103360451,"11"
export_early_B3_B03_CD8 _2020-06-16,2417.24,135.744,358.356,-61.4405,736.472,-548.949,-0.810574,20306.2,14.1179,36133.9,29626.9,FALSE,10.6330781202389,68.9532225559916,"22"
export_early_B3_B03_CD8 _2020-06-16,-323.673,197.732,110.038,218.846,213.702,123.139,70.7917,11243.2,6622.1,-191.116,5085.47,TRUE,-1.19903594287603,39.0056921891824,"28"
export_early_B3_B03_CD8 _2020-06-16,-324.105,129.52,491.706,29.9644,1411.39,1180.6,14.7379,5916.41,-19.292,1425.29,1732.12,TRUE,-7.78284022480239,32.9575426061113,"3"
export_early_B3_B03_CD8 _2020-06-16,-22.4106,129.872,164.165,224.168,2537.75,347.627,-4.83603,7540.42,138.791,1943.04,81.0141,FALSE,10.435010040513,14.3119102297165,"8"
export_early_B3_B03_CD8 _2020-06-16,4189.85,134.327,258.641,3393.41,1780.23,63.056,44.1419,-158.118,92.4103,528.319,718.513,FALSE,12.4794308391101,-20.475823288471,"6"
export_early_B3_B03_CD8 _2020-06-16,2221.58,229.271,339.029,90.5996,307.67,233.449,-2.29402,2375.33,-4.0105,3711.03,102.135,TRUE,-18.8138595883972,-0.507933909826777,"9"
export_early_B3_B03_CD8 _2020-06-16,21902,476.591,1530.3,1047.61,2132.68,-305.68,-54.8374,20940.6,346.399,4777.92,918.808,TRUE,47.0900337271915,-2.5537323241531,"21"
export_early_B3_B03_CD8 _2020-06-16,4800.66,-31.0316,387.967,126.611,425.569,75.0706,48.6535,13379.4,65.2507,2353.74,1713.82,FALSE,37.7216774167485,12.4241858239254,"29"
export_early_B3_B03_CD8 _2020-06-16,5421.48,128.126,159.766,5189.1,3558.89,620.116,-30.4491,376.919,159.567,10554.1,-19.9934,FALSE,17.2367342327566,-8.08818684505352,"15"
export_early_B3_B03_CD8 _2020-06-16,1068.33,900.201,505.839,189.702,-59.379,146.84,-31.2495,48771.3,959.348,477.673,15983,FALSE,31.6598460261401,25.5754310669276,"19"
export_early_B3_B03_CD8 _2020-06-16,64.9435,4.30506,284.878,40.8448,691.52,523.407,173.764,8.97788,100.331,347.192,1336.84,TRUE,-25.4772006480306,33.0729471951862,"3"
export_early_B3_B03_CD8 _2020-06-16,494.576,305.62,15.675,383.665,452.893,1316.43,102.812,15162.8,2112.42,183.199,350.9,FALSE,26.1991136434832,29.5098194473141,"8"
export_early_B3_B03_CD8 _2020-06-16,-80.0355,190.909,328.356,511.333,1172.28,86.5407,194.904,5119.25,604.596,314.027,230.142,FALSE,-3.39698152737429,14.8798152806763,"4"
export_early_B3_B03_CD8 _2020-06-16,1912.91,139.336,209.568,1086.21,1048.67,3.78576,50.062,4155.99,1186.67,255.046,500.727,FALSE,9.82501703699375,8.71476855812996,"5"
export_early_B3_B03_CD8 _2020-06-16,259.611,148.692,74.486,400.152,526.158,1466.42,7.54137,15757.7,3258.36,171.798,1478.09,FALSE,24.9917844215881,34.3726011908851,"28"
export_early_B3_B03_CD8 _2020-06-16,505.314,92.3572,275.654,84.3311,125.078,228.004,23.8894,6064.99,885.065,-51.7974,199.641,FALSE,4.70158193810549,20.4158567174745,"10"
export_early_B3_B03_CD8 _2020-06-16,4146.96,147.482,314.111,227.318,39.5569,44.8041,71.104,14794.1,925.042,-34.8024,128.656,TRUE,35.7526104364283,14.2770401295993,"29"
export_early_B3_B03_CD8 _2020-06-16,4694.97,203.631,177.298,2470.36,1667.39,263.254,38.2496,329.762,-79.911,1443.64,763.173,FALSE,15.7453467109942,-18.3154496501782,"1"
export_early_B3_B03_CD8 _2020-06-16,7809.5,157.3,78.458,5074.02,2609.27,16.5487,-5.89023,575.458,72.4399,653.032,889.732,FALSE,38.7737562135801,-19.1685827488411,"1"
export_early_B3_B03_CD8 _2020-06-16,19837.6,120.738,454.291,81.9205,534.821,-77.0559,24.0376,665.038,107.548,3062.09,2499.28,FALSE,46.2532520680546,1.67094348359715,"21"
export_early_B3_B03_CD8 _2020-06-16,-107.337,99.9362,74.3854,-35.7043,786.33,243.218,27.8117,8152.32,1095.13,85.2105,1946.14,TRUE,-3.52730871905198,34.0273861246303,"25"
export_early_B3_B03_CD8 _2020-06-16,329.363,69.2728,81.6299,75.3332,629.725,478.032,-24.3665,616.357,2251.43,307.051,-38.4845,FALSE,-41.2488905093553,11.8149566577526,"5"
export_early_B3_B03_CD8 _2020-06-16,-41.7076,49.0104,-197.855,147.116,4.99417,113.646,-720.978,1227.31,12272.3,290.355,18524.5,TRUE,-1.5727337408494,59.4267250402881,"20"
export_early_B3_B03_CD8 _2020-06-16,3149.1,59.9581,197.231,4484.67,2363.09,102.606,6.67037,276.027,217.316,1027.24,260.495,FALSE,4.08080526927461,-29.9799734558761,"6"
export_early_B3_B03_CD8 _2020-06-16,6472.3,180.262,478.209,3464.51,2025.37,62.8201,52.7308,369.101,-20.9352,1097.16,241.629,TRUE,26.9508141750695,-19.2808534868577,"1"
export_early_B3_B03_CD8 _2020-06-16,366.285,236.155,229.032,222.321,621.643,1948.84,123.937,9495.85,636.39,115.031,-20.9675,FALSE,17.1880259806183,18.1978030756172,"8"
export_early_B3_B03_CD8 _2020-06-16,-60.2237,23.5916,122.434,46.2934,38.396,628.92,8.17711,43.6075,233.922,331.447,777.062,FALSE,-30.5940612914744,22.5644908214045,"3"
export_early_B3_B03_CD8 _2020-06-16,414.659,63.416,348.571,1480.74,504.503,151.036,-144.578,9446.88,-11.4595,11329.7,-275.704,FALSE,17.9254663689082,2.87531336589502,"15"
export_early_B3_B03_CD8 _2020-06-16,104.928,54.9899,231.753,168.927,627.477,666.921,-30.0186,328.596,176.675,1045.17,438.174,TRUE,-31.9586433126655,-3.3425003354789,"14"
export_early_B3_B03_CD8 _2020-06-16,1063.87,191.985,679.36,26.8874,621.425,159.969,1.07272,15909.7,28.4721,1247.85,1483.88,FALSE,29.6578249178963,29.2337086314044,"29"
export_early_B3_B03_CD8 _2020-06-16,59.012,119.423,220.72,991.442,878.553,117.192,35.6731,3030.55,330.355,4903,11607.7,FALSE,-16.4066994900592,55.3501677474348,"22"
export_early_B3_B03_CD8 _2020-06-16,371.48,19.0371,143.456,540.011,403.61,532.173,-31.029,280.722,1101.31,498.175,178.887,FALSE,-39.6501968102552,8.94108898734024,"5"
export_early_B3_B03_CD8 _2020-06-16,4126.52,49.1894,110.77,2892.24,1506.06,24.3039,10.5378,-140.486,259.302,893.432,84.5563,FALSE,10.6461931214123,-20.635757830432,"6"
export_early_B3_B03_CD8 _2020-06-16,2705.45,85.732,177.221,1834.79,1224.26,-25.7216,-48.9074,140.069,192.689,1056.11,353.103,FALSE,4.47954671651486,-13.0106469626425,"6"
export_early_B3_B03_CD8 _2020-06-16,3504.72,-101.541,104.083,3165.36,1333.66,-150.608,-285.25,-83.1158,137.604,12426.6,11579.1,FALSE,0.395207002255413,27.6571837243071,"22"
export_early_B3_B03_CD8 _2020-06-16,-23.2062,156.743,315.748,126.767,583.835,181.014,147.542,13972.1,51.8319,346.159,941.177,FALSE,25.6980166634164,28.4461651403574,"29"
export_early_B3_B03_CD8 _2020-06-16,4839.2,436.666,3124.05,282.632,658.343,-26.2873,106.829,14697.2,2502.91,36.8176,127.008,FALSE,34.7030545593501,15.2583786112404,"29"
export_early_B3_B03_CD8 _2020-06-16,1682.21,61.7214,67.1574,3458.81,2469.57,69.3402,18.9315,639.028,-90.7976,1034.61,292.685,FALSE,-4.85003721015017,-29.469565714372,"6"
export_early_B3_B03_CD8 _2020-06-16,9955.37,-8.51339,455.525,96.3838,108.043,-112.604,48.7992,14310.9,-6.82036,137.346,822.435,FALSE,40.7246823517965,8.99831850621107,"21"
export_early_B3_B03_CD8 _2020-06-16,3512.41,124.062,672.768,73.8484,221.679,5.27545,62.847,9660.03,891.088,455.069,23.0069,FALSE,35.7988849697826,13.3424246475349,"29"
export_early_B3_B03_CD8 _2020-06-16,576.872,65.8863,233.885,327.27,324.112,449.471,37.3708,9720.27,385.396,442.387,6296.47,FALSE,0.459399120951721,34.2867413119995,"25"
export_early_B3_B03_CD8 _2020-06-16,161.915,67.8091,331.828,66.3073,669.869,126.514,23.3547,569.649,236.34,380.586,1586.19,FALSE,-23.39247435808,22.427460549474,"17"
export_early_B3_B03_CD8 _2020-06-16,4141.72,160.362,327.034,170.984,1960.93,-49.8584,-14.3624,26703.7,995.521,288.315,244.317,FALSE,37.5525123948758,26.6045616294102,"21"
export_early_B3_B03_CD8 _2020-06-16,1434.2,86.6917,118.923,28.9269,185.375,-173.392,170.752,-51.6074,4557.27,1459.05,38239.7,FALSE,-5.63381418255835,62.656428808876,"20"
export_early_B3_B03_CD8 _2020-06-16,145.999,307.244,110.278,1213.69,200.338,464.5,-367.913,31846.6,6356.75,-62.764,263.564,FALSE,31.7926748519543,36.7873613309811,"28"
export_early_B3_B03_CD8 _2020-06-16,993.557,65.1802,530.944,165.356,-5.68112,-6.13117,101.573,585.371,45.4494,1768.55,143.771,FALSE,-19.24164894396,3.70930907093247,"17"
export_early_B3_B03_CD8 _2020-06-16,5649.01,214.022,204.239,2849.99,1559.38,-29.304,-39.5543,-73.1363,13.6364,1924.2,1865.44,FALSE,23.6633158122814,-19.431750215304,"1"
export_early_B3_B03_CD8 _2020-06-16,699.237,169.611,-125.124,59.0323,313.338,-36.8033,-55.7439,1474.94,5908.97,147.972,23409.2,FALSE,-2.35359865313975,58.7776280184684,"20"
export_early_B3_B03_CD8 _2020-06-16,3789.85,126.285,78.3564,55.139,251.121,150.524,14.9139,650.569,132.954,430.38,984.053,FALSE,13.5196005855127,-7.49567701929079,"9"
export_early_B3_B03_CD8 _2020-06-16,-40.3722,98.7221,6.48454,36.006,134.471,258.124,21.2038,319.122,1259.17,423.708,2609.77,TRUE,-19.6836963110164,38.1000018615332,"17"
export_early_B3_B03_CD8 _2020-06-16,1319.75,127.336,338.285,1491.81,1271.82,471.363,43.5208,189.073,94.7434,1581.54,1291.91,FALSE,-12.2340233847417,-8.93957221472796,"6"
export_early_B3_B03_CD8 _2020-06-16,1509.53,113.832,328.264,334.269,-223.752,69.0627,-69.5303,6058.59,155.984,1625.84,171.522,FALSE,16.4547824920994,10.2767964226644,"2"
export_early_B3_B03_CD8 _2020-06-16,343.999,267.204,493.784,963.756,1514.35,217.972,67.9771,5209.88,105.962,398.187,700.817,FALSE,-3.32402945234345,16.8021094086229,"2"
export_early_B3_B03_CD8 _2020-06-16,4961.57,118.698,245.518,3223.46,2087.1,173.008,-42.0706,8066.86,564.428,-136.046,133.437,FALSE,33.7964388205822,9.32952795919088,"4"
export_early_B3_B03_CD8 _2020-06-16,2132.58,6.53363,24.1877,-8.22334,316.592,-65.3787,119.572,2823.94,2181.35,-67.4653,1089.58,FALSE,-3.52471548482745,8.35429442785217,"9"
export_early_B3_B03_CD8 _2020-06-16,117.665,479.041,323.347,345.721,922.004,941.497,-33.174,17799.2,1538.59,111.642,14.2435,FALSE,30.1452452933493,31.2247440325313,"8"
export_early_B3_B03_CD8 _2020-06-16,246.096,173.315,644.206,385.954,512.877,63.8461,199.482,3275.57,195.709,906.197,381.703,FALSE,-15.6998329379572,11.3207473380954,"17"
export_early_B3_B03_CD8 _2020-06-16,4274.29,197.83,322.508,1033.01,2389.52,116.187,61.3893,3740.02,85.1785,857.516,1164.11,FALSE,25.0808539767679,-8.33372483815544,"4"
export_early_B3_B03_CD8 _2020-06-16,1996.31,47.0826,71.1074,1821.36,1753.55,2.83083,14.0941,-33.1868,34.4628,2349.38,-46.1841,FALSE,-0.839938775956561,-14.6005398086672,"15"
export_early_B3_B03_CD8 _2020-06-16,-714.699,159.104,91.4426,163.694,549.112,1734.36,-399.979,24195.2,11670.2,20.8571,3180.2,FALSE,26.1301287146992,37.0487162785424,"28"
export_early_B3_B03_CD8 _2020-06-16,144.128,116.444,75.4452,48.7349,1022.96,188.654,87.2691,588.352,2348.32,-25.8046,53.9975,TRUE,-43.6631819290611,12.4336159432587,"5"
export_early_B3_B03_CD8 _2020-06-16,42.0692,151.314,252.125,1059.72,1468.33,165.277,26.776,9304.54,25.0973,1664.33,-45.4939,TRUE,12.1064166042616,19.8455242301694,"8"
export_early_B3_B03_CD8 _2020-06-16,522.086,68.3547,-76.9367,83.7867,144.849,125.802,98.984,-245.159,3871.41,101.175,9498.22,FALSE,-10.2490550934011,49.8590906963668,"27"
export_early_B3_B03_CD8 _2020-06-16,2911.44,203.372,454.052,2264.31,1672.43,43.7045,110.516,1453.4,-108.324,1038.37,214.176,FALSE,2.90486223576508,-17.3191689304591,"6"
export_early_B3_B03_CD8 _2020-06-16,5491.66,259.585,770.225,2807.46,1520.7,964.224,-4.40277,165.096,203.752,1206.99,614.662,FALSE,16.4656338881833,-16.228105493446,"1"
export_early_B3_B03_CD8 _2020-06-16,100.546,18.3031,94.5341,74.6735,404.374,239.189,36.7338,-142.842,987.744,-79.645,3457.8,FALSE,-20.9103181162441,42.3739869990017,"17"
export_early_B3_B03_CD8 _2020-06-16,439.093,557.195,3769.58,2190.48,1326.6,1974.88,24.3086,7549.75,351.874,2198.72,1468.67,FALSE,6.8621079820871,20.0707873360022,"8"
export_early_B3_B03_CD8 _2020-06-16,907.317,120.861,194.319,3689.96,3095.66,484.866,-83.4453,321.239,260.342,7610.18,5480.34,FALSE,8.43710305412319,-2.90405190836309,"22"
export_early_B3_B03_CD8 _2020-06-16,6440.11,692.065,323.826,394.745,977.758,107.133,173.535,13114.1,1823.05,273.283,461.312,FALSE,37.1353435680211,12.2272740958924,"29"
export_early_B3_B03_CD8 _2020-06-16,63.9388,83.2996,156.609,243.864,611.16,153.484,25.4553,5715.75,271.66,389.834,2089.14,FALSE,-6.11356770850019,28.5431415175688,"25"
export_early_B3_B03_CD8 _2020-06-16,311.538,32.2518,-48.7209,148.32,433.131,155.445,13.4202,7913.2,2955.42,112.135,4508.92,FALSE,1.60023672010851,36.1005046279816,"28"
export_early_B3_B03_CD8 _2020-06-16,-362.558,1094.17,378.634,591.119,947.211,491.533,111.139,6497.52,-53.1748,1058.92,1341.77,FALSE,3.20576688200651,21.866945025286,"2"
export_early_B3_B03_CD8 _2020-06-16,3097.78,192.113,320.616,11243.4,2536.64,36.6861,109.374,-89.1093,836.371,105.394,226.909,FALSE,1.44343404943908,-35.3151726867136,"6"
export_early_B3_B03_CD8 _2020-06-16,342.269,437.302,667.531,1811.81,1827.57,825.482,-6.15483,38408.8,1099,133.327,962.554,FALSE,35.9793993049805,31.2646263736157,"19"
export_early_B3_B03_CD8 _2020-06-16,-14.4003,600.759,3149.12,2450.08,814.203,942.517,88.7797,1041.96,88.1132,1275.4,875.484,FALSE,-20.6461835850089,4.75126218712025,"3"
export_early_B3_B03_CD8 _2020-06-16,3079.77,136.222,449.765,4877.86,2266.34,17.7749,33.3488,229.463,168.175,1259.81,203.517,TRUE,3.35336113572801,-19.3109482630264,"6"
export_early_B3_B03_CD8 _2020-06-16,613.594,89.2679,141.922,935.053,1809.94,203.046,135.561,7212.98,193.224,588.647,5484.65,FALSE,-6.77899737017591,35.6894691104189,"25"
export_early_B3_B03_CD8 _2020-06-16,270.309,150.53,122.801,119.888,912.382,426.451,113.046,-52.4427,55.0695,4511.11,3336.95,FALSE,-17.8439762674676,25.8389647112186,"22"
export_early_B3_B03_CD8 _2020-06-16,926.55,58.6442,274.058,4760.94,4023.91,18.8484,-107.361,-126.988,645.564,553.06,183.743,FALSE,-15.8715528911173,-40.8221039711705,"16"
export_early_B3_B03_CD8 _2020-06-16,-292.523,99.3972,210.54,183.006,582.987,433.362,12.7934,15197.2,3995.07,558.897,1421.87,FALSE,23.657993868971,34.0270196532277,"28"
export_early_B3_B03_CD8 _2020-06-16,386.798,151.456,254.118,1044.58,801.658,91.6016,-5.33218,166.971,223.412,1364.52,490.741,FALSE,-20.9619774474449,-4.91735471616906,"6"
export_early_B3_B03_CD8 _2020-06-16,144.888,151.391,285.367,405.128,1533.5,1244.67,62.0279,213.599,81.2717,1008.63,370.371,FALSE,-12.1540815195173,8.86982567888566,"3"
export_early_B3_B03_CD8 _2020-06-16,6834.67,132.773,128.082,4529.13,2303.56,56.2697,44.8541,443.879,-1.89733,1389.7,506.366,FALSE,32.4946712625736,-21.5234283144708,"1"
export_early_B3_B03_CD8 _2020-06-16,73.5481,85.6285,225.22,626.928,2178.71,256.165,-21.1748,5404,202.823,90.0662,1420.66,TRUE,-8.19718037077954,24.8085519433415,"8"
export_early_B3_B03_CD8 _2020-06-16,285.07,177.35,126.087,425.095,314.293,771.174,-179.242,27446.8,5930.11,-4.22073,1415.79,FALSE,31.9231182520472,38.0065310231334,"28"
export_early_B3_B03_CD8 _2020-06-16,-9.49296,118.312,-185.792,49.9499,914.819,136.516,350.619,17221.2,8492.78,-7.33462,186.875,FALSE,20.2385916879065,42.7877333027749,"28"
export_early_B3_B03_CD8 _2020-06-16,3243.46,1200.8,239622,192645,26664.4,2290.89,176.304,-8025.52,2757.91,-7565.33,1098.16,FALSE,-28.2237883578683,-90.6115346099312,"11"
export_early_B3_B03_CD8 _2020-06-16,461.599,101.962,173.666,115.848,2159.08,81.3302,5.49452,1254.69,-43.0509,878.351,-4.26388,FALSE,-22.5830112733233,-12.1554045931578,"4"
export_early_B3_B03_CD8 _2020-06-16,231.858,502.414,175.531,206.241,329.685,418.675,158.393,136.899,-22.0841,187.556,781.367,TRUE,-25.6265553154703,32.0726269196926,"3"
export_early_B3_B03_CD8 _2020-06-16,426.045,261.669,340.836,470.12,1167.95,1891.47,-24.8048,62239.3,2105.32,-42.4374,236.106,FALSE,39.8960785846112,33.059551538888,"19"
export_early_B3_B03_CD8 _2020-06-16,1189.77,106.358,164.064,-3.55119,266.229,192.37,-55.6228,3826.94,1027.43,126.945,53.0805,FALSE,-5.53140821426267,15.1562028213945,"5"
export_early_B3_B03_CD8 _2020-06-16,3725.77,195.629,144.436,5329.66,1660.45,-20.3028,-24.0509,-469.189,564.952,131.286,-66.6761,TRUE,7.79576096378431,-20.8765958980242,"6"
export_early_B3_B03_CD8 _2020-06-16,191.039,133.785,561.103,627.551,1027.37,673.057,-45.0856,18792.5,572.643,-23.6112,120.046,TRUE,27.0158076673823,30.4942417862682,"19"
export_early_B3_B03_CD8 _2020-06-16,677.863,201.387,248.427,235.685,117.903,309.216,537.388,1246.12,524.033,192.446,1331.51,FALSE,-41.3463270046418,15.0101485787737,"5"
export_early_B3_B03_CD8 _2020-06-16,2865.76,164.008,455.722,5551.82,1706.92,127.703,-1.70375,1163.03,9.0238,1155.07,338.256,FALSE,2.13816159298303,-22.6869368798443,"6"
export_early_B3_B03_CD8 _2020-06-16,631.969,371.484,204.965,199.109,972.982,159.271,-50.9663,25083.7,553.048,32.9362,725.054,FALSE,33.9985711803232,32.643608466357,"19"
export_early_B3_B03_CD8 _2020-06-16,798.426,77.3363,221.003,3436.62,1315.57,66.2843,-44.6263,68.1422,69.7575,3330.91,146.118,FALSE,-4.69903461853028,-12.418523923883,"6"
export_early_B3_B03_CD8 _2020-06-16,1027.45,38.3582,518.281,119.021,43.6597,63.2013,107.039,10953.7,750.375,37.6817,23.0269,FALSE,22.3754865295069,25.0859903752273,"10"
export_early_B3_B03_CD8 _2020-06-16,311.509,81.1768,263.184,132.595,539.425,550.892,-73.4057,12388.6,2059.99,7.16661,51.1621,FALSE,22.4367461172283,29.4076724626168,"28"
export_early_B3_B03_CD8 _2020-06-16,135.722,138.441,165.118,1620.73,1452.98,162.485,-44.8726,-79.8723,40.469,892.448,-101.782,FALSE,-21.7583112955057,-11.6994453823486,"14"
export_early_B3_B03_CD8 _2020-06-16,-256.405,218.026,201.123,381.279,1382.88,1281.07,-3.20648,10160.1,650.434,354.912,919.948,TRUE,8.75020804825197,28.6810110153221,"8"
export_early_B3_B03_CD8 _2020-06-16,896.523,115.427,134.096,39.1565,-68.4451,109.967,1714.95,3847.3,11992.1,426.973,91.3425,FALSE,9.23304011394616,33.0251637321282,"28"
export_early_B3_B03_CD8 _2020-06-16,351.458,120.974,151.752,65.9886,336.928,171.019,294.76,178.232,158.85,241.561,3928.3,FALSE,-20.531692024608,40.8533694323363,"22"
export_early_B3_B03_CD8 _2020-06-16,4238.01,96.3835,200.671,4492.35,1715.31,-59.1208,-28.8906,220.373,80.9261,1135.3,-10.3293,TRUE,8.25671026335177,-20.6158550876842,"6"
export_early_B3_B03_CD8 _2020-06-16,1769.07,310.994,665.872,796.952,861.738,79.4413,-40.1686,27815.7,7784.8,-402.835,210.106,FALSE,26.1025623513636,38.7997440024902,"28"
export_early_B3_B03_CD8 _2020-06-16,6073.75,51.5535,-88.8185,149.605,384.621,128.286,35.4396,6882.31,3373.49,-150.882,560.154,FALSE,37.9937825852239,7.25525846659521,"24"
export_early_B3_B03_CD8 _2020-06-16,-75.7541,125.763,-165.545,202.756,1292.36,237.489,66.0659,12278.1,7065.44,662.074,6320.63,FALSE,12.5751362500964,42.504500593473,"28"
export_early_B3_B03_CD8 _2020-06-16,175.332,320.054,515.531,-69.5997,1585.53,1315.35,91.5058,10094.5,2.21812,1085.58,65.5104,FALSE,20.8258422090923,18.0867186297378,"8"
export_early_B3_B03_CD8 _2020-06-16,-226.291,135.551,195.131,695.295,519.721,232.921,7.6053,10113.4,1629.33,327.125,3010.1,FALSE,10.6450516113272,29.3941545673536,"28"
export_early_B3_B03_CD8 _2020-06-16,213.712,251.385,-97.6212,56.808,1363.49,1641.73,-169.567,7807.8,5386.38,74.1578,435.575,FALSE,14.0661604671977,34.1045050243627,"28"
export_early_B3_B03_CD8 _2020-06-16,7395.49,134.548,331.739,3269.96,1895.6,1.64153,100.389,381.116,52.819,971.99,1658.85,FALSE,34.8823759350651,-15.9243815949095,"1"
export_early_B3_B03_CD8 _2020-06-16,234.125,387.833,812.323,650.799,1470.43,811.655,-90.6199,5588.05,145.258,2541.49,542.48,FALSE,4.15290814194924,16.9602045040751,"3"
export_early_B3_B03_CD8 _2020-06-16,753.318,124.562,134.613,294.332,662.481,298.563,-337.955,-117.076,88.2402,19903.4,-60.1439,FALSE,21.6186458679251,-4.50472390444786,"15"
export_early_B3_B03_CD8 _2020-06-16,4349.97,26.4379,181.651,5441.95,2000.99,110.128,74.1525,882.738,59.8389,1339.14,62.7069,FALSE,11.6956084888683,-24.7631780115353,"6"
export_early_B3_B03_CD8 _2020-06-16,1872.2,86.1879,454.786,171.69,455.246,-49.2696,199.079,38627.8,2802.09,58.9973,61.8668,FALSE,34.8352562960354,32.29658431858,"19"
export_early_B3_B03_CD8 _2020-06-16,3264.84,59.8181,232.095,3877.74,1789.69,47.6289,13.271,825.702,-66.5328,1594.74,1193.53,TRUE,3.36543447864734,-10.9287527798618,"6"
export_early_B3_B03_CD8 _2020-06-16,15.8767,150.917,156.594,755.401,1672.93,-6.43154,56.0077,5370.31,593.529,-106.064,5346.35,FALSE,-11.7734560439284,38.5181058057492,"25"
export_early_B3_B03_CD8 _2020-06-16,1219.69,-3.53981,425.369,1736.5,1159.87,86.5079,7.79757,492.414,98.0769,965.923,519.875,FALSE,-13.2579343180485,-12.4188567963364,"6"
export_early_B3_B03_CD8 _2020-06-16,-69.6586,72.1369,297.43,123.846,359.265,1511.09,11.9274,1425.3,1388.02,62.3782,218.378,FALSE,-12.3693085703615,17.8019156100721,"3"
export_early_B3_B03_CD8 _2020-06-16,978.923,146.55,263.347,510.904,188.17,-13.3898,51.0529,14735.8,162.984,112.335,2685.86,TRUE,12.4888897610002,32.9066523967633,"29"
export_early_B3_B03_CD8 _2020-06-16,3566.47,99.4862,344.938,7237.63,2003.43,-31.2499,-308.856,130.58,-73.3073,20412,-383.855,FALSE,24.9284799441705,-9.57278584910624,"15"
export_early_B3_B03_CD8 _2020-06-16,2004.85,149.839,98.7521,234.645,363.257,262.195,-45.2952,13871,2492.44,220.147,154.278,FALSE,28.4591057156778,25.5307390688877,"29"
export_early_B3_B03_CD8 _2020-06-16,-20.5051,200.083,711.729,-18.1288,862.435,877.789,115.311,15810.9,588.941,-61.0674,195.803,FALSE,28.4807631913338,27.0557699691512,"8"
export_early_B3_B03_CD8 _2020-06-16,4875.98,286.317,618.485,4233,2288.83,23.1239,-22.4049,852.452,124.974,1677.55,188.304,FALSE,18.2087928185099,-24.1677479119019,"1"
export_early_B3_B03_CD8 _2020-06-16,587.133,15.1311,190.245,73.4871,-35.958,308.866,20.5786,1390.81,696.747,165.404,400.524,FALSE,-27.3913315386807,15.4273280707229,"5"
export_early_B3_B03_CD8 _2020-06-16,1974.66,144.061,824.545,183.896,536.299,1863.81,-36.6154,9078.99,10.7211,909.938,1113.47,FALSE,17.6512544915603,20.5939180185964,"8"
export_early_B3_B03_CD8 _2020-06-16,123.064,8.66167,363.784,62.781,2764.4,1774.62,-30.5903,7278.89,19.4022,1446.96,399.915,TRUE,9.77553472554537,13.0791282435678,"8"
export_early_B3_B03_CD8 _2020-06-16,464.63,290.112,712.245,169.143,40.9379,75.8948,-81.3285,3556.33,89.811,3072.88,5.71403,TRUE,-12.3741429630391,12.713840465359,"17"
export_early_B3_B03_CD8 _2020-06-16,196.903,173.069,150.49,9.22507,80.0377,1962.65,539.498,16451.3,2770.09,235.366,492.138,FALSE,23.8683172098942,34.2024584581711,"8"
export_early_B3_B03_CD8 _2020-06-16,-969.973,7.61361,-95.7301,113.295,166.909,-68.974,192.651,-1018.96,6510.84,266.458,21430.6,FALSE,-3.8251858174015,60.0295050691704,"20"
export_early_B3_B03_CD8 _2020-06-16,2666.59,93.0621,409.02,3042.03,1628.77,-11.8557,-81.9318,145.992,53.0242,1459.66,437.283,FALSE,4.96068098119894,-17.4437662974941,"6"
export_early_B3_B03_CD8 _2020-06-16,443.331,169.905,338.883,1515.49,1327.77,193.306,-503.771,696.128,202.92,31784.1,-205.172,FALSE,25.8978950353384,-5.42148703596247,"15"
export_early_B3_B03_CD8 _2020-06-16,10951.8,152.376,287.569,5075.04,1669.99,-108.509,-59.3048,349.995,98.7034,1259.43,264.205,FALSE,46.0619419565733,-12.5035649067783,"1"
export_early_B3_B03_CD8 _2020-06-16,-546.076,143.852,-13.5198,182.973,85.9576,430.426,-145.317,4532.79,3457.27,-79.4816,1966.89,FALSE,-1.29988399707601,34.786284015505,"28"
export_early_B3_B03_CD8 _2020-06-16,55.4804,89.8665,-123.901,170.959,401.029,171.672,50.6723,9556.82,11206.9,182.806,2123.49,FALSE,16.8603861401015,43.153742257602,"28"
export_early_B3_B03_CD8 _2020-06-16,257.166,214.411,238.803,464.867,568.964,1656.87,26.3884,4695.02,811.745,78.2587,144.388,FALSE,3.46216972191923,15.7177065723567,"3"
export_early_B3_B03_CD8 _2020-06-16,122.138,126.734,404.853,167.612,796.732,1251.91,-20.105,156.65,2575.57,-24.385,180.897,FALSE,-25.5245148512382,16.4966710516134,"3"
export_early_B3_B03_CD8 _2020-06-16,-749.016,13.5487,153.197,1878.18,959.187,70.5105,-1.89289,3696.36,166.23,532.824,9281.11,TRUE,-7.16562006043411,50.9489619251098,"25"
export_early_B3_B03_CD8 _2020-06-16,-95.9597,128.404,111.975,72.1051,27.2598,722.794,63.3365,274.073,910.865,185.02,386.123,TRUE,-33.4050795829482,16.7757964864695,"5"
export_early_B3_B03_CD8 _2020-06-16,4277.12,552.398,1804.52,4962.34,4428.57,135.398,-193.462,2519.9,706.253,12711.1,1839.12,FALSE,18.6614038825535,-7.16894456550047,"15"
export_early_B3_B03_CD8 _2020-06-16,4986.87,92.319,108.495,2895.45,1329.53,12.5412,47.389,212.257,-77.3156,6473.57,352.479,FALSE,17.2514920029874,-11.8048717532596,"15"
export_early_B3_B03_CD8 _2020-06-16,193.083,186.662,200.631,83.6309,198.585,123.287,28.0343,3458.9,615.731,26.2096,735.141,TRUE,-16.691186239426,24.5413947211486,"5"
export_early_B3_B03_CD8 _2020-06-16,480.795,90.6818,239.656,385.34,1625.35,228.349,-7.43099,16582.5,101.44,1329.84,237.82,FALSE,29.1157200025475,30.2306911076225,"19"
export_early_B3_B03_CD8 _2020-06-16,3833.69,206.771,407.357,3443.83,1508.23,77.2181,50.9214,218.401,293.684,883.953,400.327,FALSE,7.57686973675086,-20.9704185216662,"6"
export_early_B3_B03_CD8 _2020-06-16,15.0754,218.469,172.113,157.697,267.474,884.545,-61.078,7435.6,1016.27,197.58,228.085,FALSE,11.534960852368,19.6943851966027,"8"
export_early_B3_B03_CD8 _2020-06-16,7599.49,405.428,172.238,8423.2,2275.86,161.908,85.4998,369.599,1085.82,622.921,34.3537,FALSE,36.4103211707147,-22.1113964921416,"1"
export_early_B3_B03_CD8 _2020-06-16,2182.23,54.3092,165.7,1955.82,1266.94,-26.1871,-9.31901,7.18361,56.0768,4937.36,-82.87,FALSE,6.98694550626894,-7.94477885400039,"15"
export_early_B3_B03_CD8 _2020-06-16,115.822,35.4157,196.225,520.683,937.628,343.24,-112.304,661.066,110.197,2937.58,-101.866,FALSE,-19.1982239391752,-5.56659794233843,"14"
export_early_B3_B03_CD8 _2020-06-16,3278.37,91.3935,-116.931,119.871,45.9445,-10.6585,-115.737,30948,6847.66,205.931,-254.99,FALSE,29.9492841252877,35.6648322422798,"28"
export_early_B3_B03_CD8 _2020-06-16,6830.11,157.335,104.972,3185.25,1533.52,45.6731,255.983,859.465,1304.63,-171.926,158.114,FALSE,30.8551608772892,-15.7746598753048,"1"
export_early_B3_B03_CD8 _2020-06-16,4346.87,265.469,169.961,340.666,941.848,449.222,75.0142,3518.45,2141.86,59.4018,164.889,FALSE,28.2233670103335,3.52109139576033,"9"
export_early_B3_B03_CD8 _2020-06-16,3055.96,632.46,527.117,918.485,3144.74,367.933,106.783,7163.02,596.404,242.095,58.9561,TRUE,25.9843782746049,8.78910128314026,"4"
export_early_B3_B03_CD8 _2020-06-16,627.097,102.556,-189.502,448.54,493.576,758.339,229.485,13544.4,7431.82,126.053,1153.81,FALSE,19.2133376568502,40.4533225758435,"28"
export_early_B3_B03_CD8 _2020-06-16,11331.9,-29.5833,323.855,553.1,400.751,-21.2736,39.4805,12417.5,-47.3715,2654.47,144.818,FALSE,40.8490905342658,11.7164270512028,"21"
export_early_B3_B03_CD8 _2020-06-16,528.656,193.052,-71.4051,208.132,-89.3533,28.219,-167.495,2560.19,4597.47,198.362,7717.36,FALSE,-3.89995170742957,45.2828847474664,"27"
export_early_B3_B03_CD8 _2020-06-16,4444.06,109.793,37.6519,6229.98,1944.66,-45.9262,-43.9776,-737.581,724.498,-304.847,-7.14838,FALSE,14.6430512475688,-27.4529629834276,"6"
export_early_B3_B03_CD8 _2020-06-16,3770.93,123.89,219.713,3055.12,1393.02,-22.4543,178.513,5914.66,149.884,-60.5471,1121.56,FALSE,25.8519380775589,7.0771212143056,"4"
export_early_B3_B03_CD8 _2020-06-16,269.156,127.279,659.088,89.8006,874.493,328.94,-25.0166,-602.504,1137.06,1.90317,285.125,FALSE,-36.3269031540751,2.28477837089451,"5"
export_early_B3_B03_CD8 _2020-06-16,332.292,149.764,543.593,255.046,552.15,1055.32,17.2994,8456.79,103.296,1543.66,403.486,FALSE,15.2247025210105,18.8725990394888,"8"
export_early_B3_B03_CD8 _2020-06-16,2271.35,117.812,547.959,3907.9,1587.4,288.983,28.2308,396.627,-22.5946,508.244,729.235,FALSE,-0.906780586835589,-19.6612201504862,"6"
export_early_B3_B03_CD8 _2020-06-16,-12.343,145.55,128.722,82.5519,251.735,588.466,-8.46029,7054.59,3555.6,-32.8478,1145.47,FALSE,8.75588057065225,31.9644570833654,"28"
export_early_B3_B03_CD8 _2020-06-16,1991.74,67.1642,91.2696,2583.64,1317.34,116.457,-2.55259,121.071,-4.01973,1576.89,784.606,TRUE,-5.02925889450986,-12.402218745422,"6"
export_early_B3_B03_CD8 _2020-06-16,474.634,84.4441,-13.9265,148.313,651.26,291.102,-79.919,10619.3,3089.49,83.987,3561.98,FALSE,11.6004979350438,33.2841623868659,"28"
export_early_B3_B03_CD8 _2020-06-16,181.437,120.873,167.272,117.252,-52.27,254.234,-33.0516,120.374,196.817,442.542,982.715,FALSE,-25.1923845641939,19.3025352903795,"17"
export_early_B3_B03_CD8 _2020-06-16,77.2963,1285.9,1376.02,734.753,1258.48,2023.63,111.456,6599.47,92.7161,1154.34,297.299,FALSE,12.6715736001429,14.7359327752084,"3"
export_early_B3_B03_CD8 _2020-06-16,5058.26,-52.7022,203.7,3219.93,1759.78,27.7894,18.8535,123.656,45.8764,4894.39,132.161,TRUE,15.2371451240816,-12.6468837613619,"1"
export_early_B3_B03_CD8 _2020-06-16,229.09,60.7071,185.221,46.3278,810.079,760.368,230.341,11661.3,2009.25,-104.52,4562.3,FALSE,7.11283402045638,34.5288036730105,"28"
export_early_B3_B03_CD8 _2020-06-16,3308.96,118.256,377.791,5578.77,1949.17,96.4393,220.226,-388.142,599.425,165.308,68.154,FALSE,2.25228673834742,-25.1022207724621,"6"
export_early_B3_B03_CD8 _2020-06-16,1150.86,250.698,654.482,1110.04,1465.26,164.874,43.3017,591.118,104.676,2083.49,561.295,FALSE,-14.1270622652126,-9.63910538245638,"15"
export_early_B3_B03_CD8 _2020-06-16,157.814,91.6323,123.342,552.8,1771.34,115.971,13.8332,7257.97,36.8094,1312.36,60.3733,TRUE,4.96124987092661,17.3669388216206,"8"
export_early_B3_B03_CD8 _2020-06-16,392.824,268.404,255.154,196.929,795.816,1362.53,80.7464,6202.49,1569.16,316.555,139.798,FALSE,8.34814594043203,17.9662794724849,"3"
export_early_B3_B03_CD8 _2020-06-16,3627.38,155.247,102.304,3477.97,2507.16,53.2329,184.535,-74.7379,573.107,43.1265,132.61,FALSE,8.16468318190572,-28.2209921186321,"9"
export_early_B3_B03_CD8 _2020-06-16,351.537,286.057,251.908,114.949,26.7813,614.435,83.6877,219.699,38.8679,357.95,989.289,FALSE,-28.0065498012391,22.5877449847883,"3"
export_early_B3_B03_CD8 _2020-06-16,1046,153.91,418.599,15.925,935.672,647.953,-56.4086,13109.4,71.6779,1739.67,-152.309,TRUE,19.83237494494,24.0433664298248,"8"
export_early_B3_B03_CD8 _2020-06-16,3848.05,104.031,186.127,3342.79,2213.22,122.096,48.0833,169.012,23.6666,1669.76,329.556,FALSE,7.8505469348889,-24.2836689388206,"6"
export_early_B3_B03_CD8 _2020-06-16,158.102,95.9389,-148.219,185.775,312.8,341.869,26.8886,-206.927,3199,175.903,2185.48,FALSE,-27.0135776011987,33.3095631037708,"27"
export_early_B3_B03_CD8 _2020-06-16,1776.68,214.267,734.154,168.626,595.678,324.505,83.6395,14300.9,744.701,338.695,88.0315,FALSE,33.0614196143073,22.3025150656388,"29"
export_early_B3_B03_CD8 _2020-06-16,-240.584,56.6939,148.172,490.546,1840.39,465.491,-86.839,12901.8,6903.06,87.9352,332.749,FALSE,17.1769627943685,39.9796916416338,"28"
export_early_B3_B03_CD8 _2020-06-16,3871.71,539.394,3229.62,3912.02,1901.56,1719.86,180.413,1065.15,491.037,1184.25,782.802,TRUE,5.27851217748712,-0.176799307665922,"11"
export_early_B3_B03_CD8 _2020-06-16,3801.67,179.86,107.064,2872.1,2288.76,-46.8798,-51.9005,-12.5056,594.328,213.672,88.5366,TRUE,9.68724994135967,-22.1704082755058,"9"
export_early_B3_B03_CD8 _2020-06-16,343.051,147.826,624.332,739.281,1442.83,1301.19,154.481,4612.39,222.648,296.138,713.551,TRUE,-2.74227453672936,19.2408935365456,"3"
export_early_B3_B03_CD8 _2020-06-16,4353.55,243.614,652.509,2880.37,2623.82,35.431,67.5443,683.132,96.0202,1752.91,741.264,TRUE,15.8673591332545,-20.0994906535182,"1"
export_early_B3_B03_CD8 _2020-06-16,728.169,118.191,555.183,1223.09,1700.2,149.181,-7.80421,4243.5,620.89,207.459,117.778,FALSE,-4.19867581050421,10.1580136423545,"4"
export_early_B3_B03_CD8 _2020-06-16,-12.4196,319.542,-20.8341,333.945,372.78,54.7264,-191.191,17702.4,4229.55,156.658,2271.52,FALSE,26.3050053632213,36.0903122870198,"28"
export_early_B3_B03_CD8 _2020-06-16,6779.71,357.542,320.041,2603.4,1892.73,202.308,79.6174,84.7129,1519.07,77.0228,182.149,FALSE,32.8759423471931,-17.9194654732461,"1"
export_early_B3_B03_CD8 _2020-06-16,303.454,61.8204,-443.227,283.805,735.572,825.423,-146.394,20745.5,12325.4,-238.226,1313.28,FALSE,21.6855710835535,42.6344394301023,"28"
export_early_B3_B03_CD8 _2020-06-16,18184.5,33.8491,235.539,62.9692,100.653,-262.621,0.952167,11992.9,1723.75,75.4869,292.616,FALSE,45.0898321299837,3.47261959531235,"21"
export_early_B3_B03_CD8 _2020-06-16,174.088,140.763,2341.46,269.406,13.1367,1553.35,112.254,161.695,221.589,1293.52,95.4864,TRUE,-30.117863197299,20.2184222929926,"3"
export_early_B3_B03_CD8 _2020-06-16,-166.124,182.275,203.835,98.0893,618.615,211.647,-87.4991,11115.2,2290.9,251.626,2606.13,FALSE,16.4749848672093,29.2125236229842,"28"
export_early_B3_B03_CD8 _2020-06-16,15.5729,120.821,395.905,122.459,573.383,519.444,-75.3475,8228.75,3704.32,485.014,13668.7,FALSE,-2.02659931793757,49.8697012811984,"20"
export_early_B3_B03_CD8 _2020-06-16,723.288,349.715,33.507,60.1744,633.563,44.0454,-96.6312,553.926,2413.73,381.523,1401.74,FALSE,-39.9817762464276,15.7860834687404,"27"
export_early_B3_B03_CD8 _2020-06-16,293.452,219.522,752.177,414.196,-138.614,607.111,23.5773,18830.7,899.096,223.752,124.865,TRUE,26.686005714607,30.7804395510832,"19"
export_early_B3_B03_CD8 _2020-06-16,3579.38,123.691,2846.59,305.714,43.8096,51.9015,82.7352,29279.4,3255.29,396.661,296.342,FALSE,29.8565686967491,27.8018369007906,"21"
export_early_B3_B03_CD8 _2020-06-16,-16.404,160.038,91.0852,148.156,562.009,635.962,-93.5758,23103.8,6307.97,-136.687,1584.04,TRUE,26.7106436178782,35.2553161798772,"28"
export_early_B3_B03_CD8 _2020-06-16,474.05,172.038,288.849,1877.29,1466.88,25.4535,-1.54279,380.09,-78.838,2272.09,315.732,FALSE,-9.99560639604916,-10.6088030991321,"6"
export_early_B3_B03_CD8 _2020-06-16,2098.47,95.852,384.814,106.59,748.676,125.182,53.8982,15177.6,840.378,109.351,251.59,FALSE,34.8454517420458,21.8658692827856,"29"
export_early_B3_B03_CD8 _2020-06-16,5814.23,195.843,218.819,4156.25,2580.26,126.617,33.7711,156.514,291.456,1438.97,1005.79,FALSE,26.628168625966,-23.5460344325038,"1"
export_early_B3_B03_CD8 _2020-06-16,775.565,51.0489,281.11,374.693,-158.784,1066.38,-40.1096,10895.5,171.376,239.95,1673.61,TRUE,10.0278221972225,30.4084553321902,"8"
export_early_B3_B03_CD8 _2020-06-16,1085.77,145.028,592.708,3517.07,1556.66,135.501,45.1162,317.721,111.913,1431.48,9.6701,FALSE,-12.9723591468889,-16.8728646210614,"6"
export_early_B3_B03_CD8 _2020-06-16,532.205,568.245,714.639,1127.58,488.092,91.261,58.5618,6569.72,106.947,2158.48,828.888,FALSE,4.21391137894469,15.8630559818564,"2"
export_early_B3_B03_CD8 _2020-06-16,-43.0579,142.976,371.199,388.86,1110.06,216.424,26.4156,14947.8,8.16876,1182.64,773.566,FALSE,25.8003562124787,30.1522549615369,"19"
export_early_B3_B03_CD8 _2020-06-16,383.616,254.575,294.15,404.578,986.393,1753.95,222.457,15367.2,4454.47,-131.719,615.102,TRUE,21.162620414038,35.9775548620084,"28"
export_early_B3_B03_CD8 _2020-06-16,211.174,260.748,562.113,571.282,966.746,260.677,-119.66,9524.92,290.558,1019.48,489.216,FALSE,17.4775737050744,22.8890157904308,"8"
export_early_B3_B03_CD8 _2020-06-16,-553.774,121.36,99.7115,77.4892,368.435,106.687,43.037,218.991,37.4909,489.507,11909,FALSE,-10.3104130221103,56.2832955467245,"22"
export_early_B3_B03_CD8 _2020-06-16,302.786,218.41,512.8,275.097,295.051,415.624,-10.0635,303.69,119.692,1210.6,294.4,FALSE,-25.1809813353366,1.32651652601455,"3"
export_early_B3_B03_CD8 _2020-06-16,1282.68,12.0191,177.987,161.023,86.0776,329.912,66.2004,14465.2,2161.28,115.346,258.577,FALSE,23.4498210029713,30.3869517215198,"29"
export_early_B3_B03_CD8 _2020-06-16,383.894,121.308,628.166,646.516,1196.76,361.681,33.5403,6972.94,122.22,1498.35,497.968,FALSE,7.03677557989949,17.5949930750413,"8"
export_early_B3_B03_CD8 _2020-06-16,6142.04,75.9052,325.225,2781.51,941.014,-30.4384,36.0104,199.374,37.8096,900.478,244.775,TRUE,25.5209043806864,-18.4387698634162,"1"
export_early_B3_B03_CD8 _2020-06-16,135.838,101.625,-141.994,303.288,496.693,944.73,-28.138,16702.8,8169.26,48.5716,672.384,FALSE,22.4050378278654,41.6087396612074,"28"
export_early_B3_B03_CD8 _2020-06-16,143.55,272.936,276.503,200.87,131.952,44.6891,18.4484,1431.38,671.601,253.671,274.771,FALSE,-25.9180572493757,9.15313147342818,"5"
export_early_B3_B03_CD8 _2020-06-16,320.734,80.9721,148.126,59.6981,87.2735,95.0894,53.4314,566.502,757.593,204.938,378.632,FALSE,-33.2962575167553,9.48275097273489,"5"
export_early_B3_B03_CD8 _2020-06-16,4672.13,214.832,900.938,2660.18,1751.92,-33.6726,-94.5936,1040.18,228.01,2178.08,771.042,FALSE,18.1616565174717,-17.4668998875834,"1"
export_early_B3_B03_CD8 _2020-06-16,382.993,131.094,79.8928,263.007,301.485,-17.7327,134.213,82.2458,815.147,1920.78,20268,FALSE,-6.08309417037608,61.222184294371,"20"
export_early_B3_B03_CD8 _2020-06-16,45.6539,6.81943,207.695,249.308,288.983,44.1336,8.72495,373.608,1007.18,3142.98,41482.6,TRUE,-3.85136498074896,62.8904621352855,"20"
export_early_B3_B03_CD8 _2020-06-16,628.963,123.103,-75.2198,165.691,122.573,181.511,-31.5467,14559.1,5100.57,180.26,-111.003,FALSE,20.2745282495912,39.2554098148714,"28"
export_early_B3_B03_CD8 _2020-06-16,6398.33,100.501,285.514,406.173,449.73,41.1651,12.9625,17864.1,609.055,109.479,1.91175,FALSE,40.1727962475875,16.6507133633548,"21"
export_early_B3_B03_CD8 _2020-06-16,3630.39,134.566,217.098,5504.17,1531.14,-90.039,-31.8511,-192.064,560.673,-18.4272,180.782,FALSE,6.77965880765056,-24.4881112544404,"6"
export_early_B3_B03_CD8 _2020-06-16,363.717,233.987,330.674,98.8637,138.321,34.3526,75.8221,7741.28,-31.6108,-2.5929,748.221,FALSE,14.2384315121886,21.4049643181206,"2"
export_early_B3_B03_CD8 _2020-06-16,56.9309,111.165,4964.46,90.6209,550.746,2277.8,15.6983,1373.31,612.906,210.213,139.953,TRUE,-3.8124412616958,15.0134485367882,"3"
export_early_B3_B03_CD8 _2020-06-16,167.521,132.948,357.645,463.167,1983.88,182.944,-557.036,9594.95,-219.767,53713.2,-743.716,FALSE,28.184817851778,-6.80125149132783,"23"
export_early_B3_B03_CD8 _2020-06-16,5655.97,84.079,105.813,2959,1272.41,5.32712,-70.0432,-188.707,74.2587,1656.22,464.673,FALSE,23.1202306524236,-19.1048944319074,"1"
export_early_B3_B03_CD8 _2020-06-16,331.199,355.459,875.536,517.995,825.957,124.749,-27.9012,5329.4,242.485,2215.59,683.135,FALSE,-2.41046508237998,13.8816190301464,"2"
export_early_B3_B03_CD8 _2020-06-16,71.7473,180.512,180.964,587.374,1028.04,591.54,22.8999,20705.2,2633.3,462.548,-130.666,FALSE,30.8693183540137,35.5940025843107,"28"
export_early_B3_B03_CD8 _2020-06-16,4548.58,249.176,613.518,3402.59,2317.94,18.8966,91.2178,1270.99,193.045,1699.55,870.162,FALSE,15.9527725926286,-23.4725762937624,"1"
export_early_B3_B03_CD8 _2020-06-16,130.669,164.561,323.128,112.505,197.097,541.038,91.0816,12487.7,789.707,111.214,115.969,FALSE,23.5239783835438,27.0169036754697,"8"
export_early_B3_B03_CD8 _2020-06-16,5078.08,289.994,466.119,5299.68,1873.99,31.9814,-38.695,342.438,338.743,1757.36,310.044,FALSE,17.7823473753538,-23.0723426379658,"1"
export_early_B3_B03_CD8 _2020-06-16,3332.14,167.691,63.5363,2376.61,2520.5,7251.07,-62.7837,765.352,-56.6132,2247.42,48.4724,TRUE,2.70132045332292,12.3639785222879,"11"
export_early_B3_B03_CD8 _2020-06-16,-96.4196,190.591,862.645,470.529,520.248,252.246,-37.3598,877.068,161.879,2307.06,809.553,FALSE,-20.8795912146424,-2.65489852456358,"17"
export_early_B3_B03_CD8 _2020-06-16,316.767,268.171,902.732,-1.48894,1577.32,1087.16,1.99999,23386.9,176.852,1203.08,486.57,FALSE,34.7257827093859,33.8878385864532,"19"
export_early_B3_B03_CD8 _2020-06-16,2774.48,72.7287,112.976,3849.2,1039.85,-7.00523,9.18795,781.199,8.55468,376.25,2193.4,FALSE,6.12303270259603,-10.2417348253519,"6"
export_early_B3_B03_CD8 _2020-06-16,720.494,102.247,255.872,1079.93,1178.26,122.812,67.8786,4979.68,199.55,2786.84,5543.11,FALSE,-16.061056750407,38.4618695913653,"25"
export_early_B3_B03_CD8 _2020-06-16,246.95,628.117,111.264,119.876,1152.3,1048.93,149.212,5813.65,1970.92,282.168,1235.73,FALSE,5.7573515949338,25.4535568799855,"3"
export_early_B3_B03_CD8 _2020-06-16,542.859,511.82,2193.14,724.488,3475.52,641.056,274.577,21811.7,580.68,188.663,220.73,TRUE,30.7579962718114,30.0713640794202,"19"
export_early_B3_B03_CD8 _2020-06-16,3050.32,570.881,468.433,-61.596,1036.37,85.3879,402.604,19969.5,5303.75,358.112,3338.74,FALSE,24.209993241571,33.2236275453363,"28"
export_early_B3_B03_CD8 _2020-06-16,342.88,155.749,130.008,112.829,111.181,69.8981,18.2463,-0.478389,634.847,10.8599,2971.39,FALSE,-21.0949757265222,40.7412340526459,"17"
export_early_B3_B03_CD8 _2020-06-16,3223.31,99.8361,165.026,3725.08,1798.52,57.0847,26.907,132.353,-23.2991,1670.82,157.148,FALSE,4.9738557144291,-21.0939511312082,"6"
export_early_B3_B03_CD8 _2020-06-16,146.856,812.442,1638.52,316.839,1801.46,61.9654,51.7961,20967.2,2096.64,155.232,317.262,FALSE,30.4080477034583,31.9954107778402,"19"
export_early_B3_B03_CD8 _2020-06-16,1105.55,243.501,243.993,103.639,420.76,290.735,-3.53204,19790.1,112.661,159.898,12039.6,FALSE,9.18471788149807,38.3303819475436,"28"
export_early_B3_B03_CD8 _2020-06-16,424.473,1555.97,879.364,169.746,2090.15,1118.18,387.427,43509.1,2283.54,200.965,443.981,FALSE,37.7474454871137,35.1228818741602,"19"
export_early_B3_B03_CD8 _2020-06-16,3929.99,95.6227,108.584,818.111,1579.92,-20.1043,-23.4794,413.578,98.9658,2741.22,1496.33,FALSE,11.6106417823816,-11.8820359831438,"6"
export_early_B3_B03_CD8 _2020-06-16,-32.8733,61.7053,199.901,2935.72,737.204,167.193,42.716,2019.3,31.4769,853.794,704.734,FALSE,-22.182843981381,-0.553735149086509,"4"
export_early_B3_B03_CD8 _2020-06-16,115.735,49.745,138.494,44.3209,611.062,254.179,-18.9248,205.623,624.441,-36.2732,219.777,FALSE,-31.8840314475369,4.56272885507539,"5"
export_early_B3_B03_CD8 _2020-06-16,3131.82,120.007,239.904,6461.47,1839.37,49.6399,88.9489,679.797,63.6396,2253.83,1804.97,FALSE,2.33550340511528,-19.077358003613,"6"
export_early_B3_B03_CD8 _2020-06-16,-259.805,127.733,395.642,94.6043,580.186,74.4313,4.70342,8703.4,79.8829,647.132,1014.67,FALSE,13.6023673159273,21.8687017814284,"2"
export_early_B3_B03_CD8 _2020-06-16,97.0345,197.396,356.083,165.128,643.205,377.173,-12.6086,110.602,151.835,173.834,2157,FALSE,-23.3258992554665,31.7564224869262,"17"
export_early_B3_B03_CD8 _2020-06-16,530.29,170.99,195.472,2089.86,1265.89,181.062,-35.4822,396.461,818.614,622.746,319.296,FALSE,-28.3628592722837,-8.08212441481913,"5"
export_early_B3_B03_CD8 _2020-06-16,24.1284,254.992,314.858,140.542,686.276,81.5214,-9.51315,4917.83,589.824,358.38,112.976,FALSE,-1.87296031022192,16.3074747308622,"5"
export_early_B3_B03_CD8 _2020-06-16,1180.34,33.3185,63.4396,70.9627,171.638,599.395,38.57,14243.1,3416.97,196.841,669.943,FALSE,22.7695679245581,33.4473053089899,"28"
export_early_B3_B03_CD8 _2020-06-16,4582.94,135.136,177.899,4377.09,2146.45,-43.4873,127.715,148.368,80.6365,1084.43,129.699,FALSE,15.0769167255688,-25.1578488859644,"6"
export_early_B3_B03_CD8 _2020-06-16,469.195,207.852,512.756,751.456,2048.91,357.158,332.702,5037.07,152.085,513.114,923.257,FALSE,-5.61976113493053,12.9561279674329,"4"
export_early_B3_B03_CD8 _2020-06-16,702.513,129.36,-204.785,88.8382,-1.3998,58.9287,-5.39706,-52.3911,5542.28,611.687,5172.24,FALSE,-7.91718058557292,44.6486363868442,"27"
export_early_B3_B03_CD8 _2020-06-16,244.907,246.81,582.525,51.5904,645.347,387.306,105.227,15133.9,6.3617,949.795,406.597,FALSE,26.4504588391877,30.2723599713421,"19"
export_early_B3_B03_CD8 _2020-06-16,1467.66,144.636,273.644,168.1,-64.6675,121.808,-127.866,18972,2512.34,501.572,17.5783,FALSE,29.6949040543636,33.9158141640517,"19"
export_early_B3_B03_CD8 _2020-06-16,699.455,870.471,2387.13,1062.36,661.805,1251.11,22.8628,14723.4,1060.27,38.1629,200.373,FALSE,24.0600739423565,27.2642750120325,"8"
export_early_B3_B03_CD8 _2020-06-16,7499.37,42.1658,92.5658,2706.68,1735.55,-8.3448,36.8875,899.878,74.5264,995.713,671.709,FALSE,34.7140813898406,-17.1342290796626,"1"
export_early_B3_B03_CD8 _2020-06-16,184.473,112.096,253.01,2410.48,1807.43,143.478,15.6871,7456.58,-42.9879,898.955,175.39,TRUE,5.72845175510673,17.5413430457366,"8"
export_early_B3_B03_CD8 _2020-06-16,2059.84,121.358,533.37,87.8438,65.4508,-12.6265,64.8909,32301.2,39.5629,939.336,339.633,FALSE,37.6539013296282,34.3311887377674,"19"
export_early_B3_B03_CD8 _2020-06-16,87.0579,110.139,761.702,60.3696,753.501,755.604,43.6725,621.521,761.35,381.533,1379.02,FALSE,-29.3715582746293,19.7187343365205,"3"
export_early_B3_B03_CD8 _2020-06-16,312.885,108.253,222.28,129.532,674.14,335.582,-102.169,9694.28,139.277,6268.04,-223.446,FALSE,17.2673374364445,14.1558869914156,"15"
export_early_B3_B03_CD8 _2020-06-16,4315.42,87.967,108.263,2718.26,1284.13,149.62,-214.623,651.268,48.3795,13594.4,-251.525,FALSE,20.0850879644142,-6.6253747555783,"15"
export_early_B3_B03_CD8 _2020-06-16,1045.08,63.7445,342.6,3031.44,1628.05,132.725,91.9445,379.197,256.453,595.051,1128.86,FALSE,-14.9781505351502,-15.8664884416636,"6"
export_early_B3_B03_CD8 _2020-06-16,3653,145.025,35.3168,465.595,302.887,-71.5366,30.816,18035.4,4114.72,-156.108,279.636,FALSE,33.8073725184164,25.1224627078495,"28"
export_early_B3_B03_CD8 _2020-06-16,142.719,237.657,82.9764,663.744,1015.54,27.9856,116.988,22696.6,5665.37,182.354,1040.92,FALSE,27.2663621599371,40.5637662194747,"28"
export_early_B3_B03_CD8 _2020-06-16,14726.6,122.208,-111.264,39.6989,422.51,303.005,7.18709,5226.76,6085.53,420.36,13604.4,TRUE,3.35946619753698,63.8494124915591,"24"
export_early_B3_B03_CD8 _2020-06-16,-734.5,228.346,170.258,500.858,995.299,521.146,130.92,14065.6,2385.48,56.2498,10591.4,TRUE,-3.59427952035133,50.6909226644861,"25"
export_early_B3_B03_CD8 _2020-06-16,230.46,1227.2,1776.26,413.92,1095.92,1652.07,41.4964,18224.9,129.445,922.265,778.505,FALSE,28.5773190312555,27.9113632209741,"19"
export_early_B3_B03_CD8 _2020-06-16,1620.51,26.8005,22.4824,521.138,1395.66,16.3795,128.251,1291.99,1908.55,-15.9052,13661.2,FALSE,-7.29638686748608,50.8337830236177,"22"
export_early_B3_B03_CD8 _2020-06-16,-19.1237,24.3753,-91.329,160.138,655.744,1877.21,220.294,2949.83,8827.72,350.606,2045.88,FALSE,9.70252444837262,42.9102365997794,"28"
export_early_B3_B03_CD8 _2020-06-16,312.717,54.6472,-199.119,93.9007,771.575,409.725,40.6933,7404.68,9812.79,15.4118,436.246,FALSE,12.2970265035101,44.5545301415729,"28"
export_early_B3_B03_CD8 _2020-06-16,735.6,35.6209,98.2113,-12.9758,343.85,251.123,159.104,1813.79,241.795,-34.731,4379.01,FALSE,-19.831364897623,41.0326762945327,"22"
export_early_B3_B03_CD8 _2020-06-16,7229.12,279.738,630.01,2172.09,1990.65,136.433,169.352,3229.29,157.051,1759.91,353.666,FALSE,33.9136352419934,-12.1728847066511,"1"
export_early_B3_B03_CD8 _2020-06-16,526.531,89.1116,239.124,197.062,235.287,44.2565,105.883,1585.34,72.0474,1379.23,396.461,FALSE,-21.7592718884431,6.20602603731569,"17"
export_early_B3_B03_CD8 _2020-06-16,2655,124.344,193.968,2947.97,1793.35,45.551,25.8544,656.15,151.868,367.989,1581.6,FALSE,3.8909519994641,-17.4360618198055,"6"
export_early_B3_B03_CD8 _2020-06-16,247.003,135.382,436.644,599.382,1955.75,537.552,95.8923,9708.14,-49.9067,2174.71,964.72,FALSE,17.6569007111972,21.7815311686701,"8"
export_early_B3_B03_CD8 _2020-06-16,270.423,172.833,95.647,233.348,162.188,304.469,-22.8645,7161.12,1308.2,499.009,970.55,FALSE,8.07736535922151,25.2507847594472,"10"
export_early_B3_B03_CD8 _2020-06-16,142.367,29.9045,264.906,113.41,320.828,675.838,80.7237,10387,306.565,184.749,718.057,FALSE,19.7446339060115,23.5705252005731,"8"
export_early_B3_B03_CD8 _2020-06-16,521.014,30.7606,32.2449,106.814,794.69,133.029,22.795,-205.796,1383.72,705.309,661.806,FALSE,-37.685298812827,5.86790991020184,"5"
export_early_B3_B03_CD8 _2020-06-16,3060.99,106.875,559.368,147.023,-193.147,359.762,34.1411,11727.6,-56.2202,6020.31,4937.71,FALSE,27.7626403318882,15.1619028335982,"29"
export_early_B3_B03_CD8 _2020-06-16,9717.91,94.6824,34.9371,5177.25,1947.56,-4.00776,-109.125,-615.303,682.792,-91.4011,-35.9294,FALSE,44.9293288890726,-15.1358933747903,"1"
export_early_B3_B03_CD8 _2020-06-16,-642.875,598.408,230.474,1530.08,965.283,1114.27,58.0472,54673.8,8948.23,144.604,1201.97,FALSE,34.3342130662642,33.9184887694015,"19"
export_early_B3_B03_CD8 _2020-06-16,189.448,20.4998,-4.09738,64.1587,1022.28,515.5,-142.312,553.089,2689.56,-50.2534,164.689,FALSE,-38.2574745175198,13.4091327428235,"5"
export_early_B3_B03_CD8 _2020-06-16,-460.836,98.3902,63.025,108.543,108.776,171.587,-251.374,-990.395,2998.01,2209.91,22952.7,FALSE,-6.09385972173613,60.8647387538438,"20"
export_early_B3_B03_CD8 _2020-06-16,328.004,58.2914,1277.11,-1.83272,856.811,454.56,33.043,1928.3,13.2705,1649.99,1410.16,FALSE,-22.3330259812296,19.569307045309,"3"
export_early_B3_B03_CD8 _2020-06-16,6118.03,553.948,314.682,798.638,683.85,1057.62,-41.5108,28738.2,1286.59,219.127,-29.946,FALSE,40.7720135031262,20.6478054634959,"21"
export_early_B3_B03_CD8 _2020-06-16,6027.21,108.574,119.39,16281.9,2319.15,-66.3405,-28.3623,-392.106,1077.25,263.441,186.818,FALSE,21.7420797193784,-31.685861421017,"11"
export_early_B3_B03_CD8 _2020-06-16,377.11,269.44,513.457,328.033,1531.36,420.83,-29.7652,34749.1,2660.8,121.199,380.189,FALSE,36.6272573657955,33.2690428955582,"19"
export_early_B3_B03_CD8 _2020-06-16,481.366,178.814,136.603,260.133,195.931,118.36,2.45952,4444.43,2852.77,2055.91,20946.1,FALSE,-5.22402347514814,57.6082849657145,"20"
export_early_B3_B03_CD8 _2020-06-16,507.434,82.92,-127.184,181.707,273.09,170.505,-133.923,-472.99,5078.06,214.598,4576.27,FALSE,-9.5877088326881,43.4505083370488,"27"
export_early_B3_B03_CD8 _2020-06-16,281.71,252.359,620.793,490.152,474.298,226.705,-29.551,3219.18,36.456,2076.25,396.68,FALSE,-14.1514731597925,7.53365323008208,"2"
export_early_B3_B03_CD8 _2020-06-16,142.053,140.01,-57.4753,128.163,153.069,217.333,12.3909,7741.86,2315.87,215.245,1432.98,FALSE,9.95778453037271,28.4682675962032,"10"
export_early_B3_B03_CD8 _2020-06-16,452.664,121.341,868.13,348.043,1870.76,583.788,-80.9439,2608.95,200.896,1886.48,1659.05,FALSE,-14.6873904345275,10.4504970054024,"4"
export_early_B3_B03_CD8 _2020-06-16,2091.13,171.73,138.914,3527.08,1418.15,42.7186,-12.0093,3.32921,77.8483,1147.87,118.574,FALSE,1.48096228486344,-16.9922126605621,"6"
export_early_B3_B03_CD8 _2020-06-16,-85.2635,109.743,152.865,163.163,41.8112,526.88,-0.839066,-187.37,1747.38,70.661,131.727,FALSE,-42.6546490741184,12.1568877311055,"5"
export_early_B3_B03_CD8 _2020-06-16,433.856,84.2554,628.905,682.903,1062.47,691.105,71.3584,53758.5,899.989,328.372,355.384,FALSE,39.3022738090305,32.7015248124695,"19"
export_early_B3_B03_CD8 _2020-06-16,-434.5,44.8162,121.993,41.3084,716.448,124.502,179.777,683.529,2844.95,316.51,11100.5,FALSE,-9.06345249807054,50.844479494476,"27"
export_early_B3_B03_CD8 _2020-06-16,4317.57,108.236,276.367,3806.71,1353.74,62.1514,-18.3985,305.38,43.7151,1397.74,340.521,FALSE,11.4061828677094,-20.0171211299512,"6"
export_early_B3_B03_CD8 _2020-06-16,647.797,125.54,-105.554,292.243,469.183,442.894,-60.4701,18779,4836.49,-75.101,2390.43,FALSE,26.9875870496039,36.6497972808211,"28"
export_early_B3_B03_CD8 _2020-06-16,1267.8,204.42,142.144,166.845,173.352,62.6496,2.20508,2109.69,2981.92,419.742,2182.09,TRUE,-11.7936677082056,39.096624272788,"27"
export_early_B3_B03_CD8 _2020-06-16,2068.45,1.66037,945.737,79.8082,272.201,176.971,6.51534,16354.7,609.876,39.8413,39.9834,FALSE,35.4327804429678,23.7306195424601,"29"
export_early_B3_B03_CD8 _2020-06-16,2892.92,45.6553,192.08,119.064,284.097,-8.44061,33.8103,18122.7,3091.52,-24.7571,171.223,FALSE,33.6052373516109,26.5390786608929,"28"
export_early_B3_B03_CD8 _2020-06-16,11265.8,202.351,1602.63,69.0732,-5.34034,-51.2692,73.833,17226,25.5967,1394.59,927.243,FALSE,40.6045761325853,10.9174729749563,"21"
export_early_B3_B03_CD8 _2020-06-16,1732.96,-7.22293,160.561,278.169,275.009,484.041,61.2921,7392.56,2326.47,104.825,1632.24,TRUE,4.28864120619553,33.3869788324322,"28"
export_early_B3_B03_CD8 _2020-06-16,2863.05,621.366,269.725,1829.89,243.681,238.58,249.604,427.316,1326.64,83.9539,-50.0663,FALSE,-2.3836760105801,-10.6056354645643,"9"
export_early_B3_B03_CD8 _2020-06-16,3.28213,619.605,3153.84,139.993,4065.87,2064.39,424.453,17583.6,16.7726,1035.12,-41.9931,FALSE,27.0652269473958,21.4300765275183,"19"
export_early_B3_B03_CD8 _2020-06-16,3399.31,207.684,227.541,76.5988,-23.0489,35.2697,94.0295,693.444,57.8715,1215.63,863.201,TRUE,-2.59120976588824,-7.17549167689073,"9"
export_early_B3_B03_CD8 _2020-06-16,587.303,105.379,218.234,2374.46,2177.9,109.677,67.5646,479.912,-17.516,1382.76,1363.45,TRUE,-18.1085127145564,-9.61388157237091,"6"
export_early_B3_B03_CD8 _2020-06-16,437.669,95.4652,234.691,59.4715,1022.92,467.986,-462.134,7451.78,-57.6315,30659.8,-433.75,FALSE,25.942266966593,-6.93367356497835,"15"
export_early_B3_B03_CD8 _2020-06-16,5226.6,236.066,335.929,4442.06,1384.02,78.9356,61.5822,125.842,42.8098,1120.67,807.971,FALSE,19.8134238938033,-19.9685418058041,"1"
export_early_B3_B03_CD8 _2020-06-16,3956.77,171.707,327.691,3245.76,1568.98,-16.8517,-19.634,242.323,89.3581,1112.71,243.415,FALSE,9.64087687977734,-20.840253224263,"6"
export_early_B3_B03_CD8 _2020-06-16,155.331,44.5411,45.8799,39.007,260.811,224.379,-93.1026,-200.988,1398.62,127.396,2091.82,FALSE,-28.2943174456416,33.188106147109,"27"
export_early_B3_B03_CD8 _2020-06-16,351.55,457.563,391.144,1152.15,1743.68,1214.19,101.148,34900.5,1175.18,213.213,77.4584,FALSE,37.2880809430345,32.8699071194891,"19"
export_early_B3_B03_CD8 _2020-06-16,2821.11,545.228,78.1177,1004.14,111.292,272.007,68.4243,-145.993,2953.41,144.721,57.7611,FALSE,-6.38738461161796,-3.73035840089027,"24"
export_early_B3_B03_CD8 _2020-06-16,366.513,266.522,185.457,308.795,570.247,136.196,14.5503,2662.92,671.575,-215.937,449.083,FALSE,-17.8043527137886,13.8105981454155,"5"
export_early_B3_B03_CD8 _2020-06-16,-458.843,213.43,118.966,319.959,1265.51,-34.5296,-22.118,1447.33,1201.83,2759.16,9948.8,FALSE,-13.4702569278003,50.8125433563358,"22"
export_early_B3_B03_CD8 _2020-06-16,73.7346,212.23,436.214,247.732,461.175,234.464,77.5665,5102.25,82.0112,1126.44,146.974,FALSE,-2.10262566929872,15.4059960089899,"2"
export_early_B3_B03_CD8 _2020-06-16,2979.27,139.623,577.036,2849.38,2227.62,-44.262,-66.5296,1207.31,96.9239,3543.93,496.575,FALSE,7.88966155515638,-16.3847088810104,"15"
export_early_B3_B03_CD8 _2020-06-16,-22.0918,89.251,139.387,163.862,812.226,603.693,1.96352,24728.4,1581.87,-105.711,190.504,FALSE,36.3803079878143,33.7764543802748,"19"
export_early_B3_B03_CD8 _2020-06-16,3671.87,210.316,410.27,2959.27,2400.47,-4.07531,121.523,483.038,100.851,2464.25,243.701,FALSE,7.04986615356567,-23.5008380461373,"6"
export_early_B3_B03_CD8 _2020-06-16,387.753,151.201,457.694,106.661,60.4851,754.214,74.8394,109.939,67.3656,369.13,1161.07,TRUE,-25.3037115693928,32.9350287163748,"3"
export_early_B3_B03_CD8 _2020-06-16,435.114,92.461,1468.51,173.049,377.364,393.676,130.056,220.569,92.883,406.657,1221.74,FALSE,-29.1522136495679,19.5717775571243,"3"
export_early_B3_B03_CD8 _2020-06-16,798.005,97.602,1077.7,19.1245,12.5956,307.887,21.5702,14424.1,3886.14,-49.6151,266.265,FALSE,21.9921634196616,33.7860224422937,"28"
export_early_B3_B03_CD8 _2020-06-16,2384.58,133.591,275.959,46.2227,6.46779,41.8122,40.9897,9018.27,759.473,248.189,77.154,FALSE,33.6256203360603,13.6210717216594,"10"
export_early_B3_B03_CD8 _2020-06-16,288.209,105.63,-108.402,255.249,1224.41,493.522,47.8938,28340.1,9652.77,94.1006,4650.78,TRUE,23.7113175307936,40.2403338326333,"28"
export_early_B3_B03_CD8 _2020-06-16,7069.59,121.024,248.844,5851.66,2174.56,29.2466,85.5606,-424.234,1033.21,-202.628,367.904,FALSE,35.15043225255,-20.6955412672408,"1"
export_early_B3_B03_CD8 _2020-06-16,26.8658,19.9874,-41.0412,133.415,-50.9151,89.0831,-59.0207,5693.32,4809.18,762.047,7893.48,FALSE,-0.827269580478616,45.2880984584408,"28"
export_early_B3_B03_CD8 _2020-06-16,8174,82.7058,248.655,2585.43,1760.96,140.854,49.7697,904.914,-75.2251,1502.51,1255.39,TRUE,35.704300537055,-13.7645479310481,"1"
export_early_B3_B03_CD8 _2020-06-16,73.4077,313.328,399.295,3551.08,1353.62,284.498,119.955,764.999,698.121,76.7594,298.531,FALSE,-37.0353623486475,-8.56678387494809,"6"
export_early_B3_B03_CD8 _2020-06-16,1302.44,258.893,524.823,679.664,1189.32,120.406,-28.1896,452.832,324.565,2650.34,812.231,FALSE,-9.13868628833406,-5.63824588235902,"15"
export_early_B3_B03_CD8 _2020-06-16,328.456,319.718,275.946,131.954,1066.4,1523.75,16.0471,46009.7,570.318,30.5606,657.509,FALSE,39.6603690354416,33.0848484915738,"19"
export_early_B3_B03_CD8 _2020-06-16,163.963,178.74,198.843,99.3959,936.125,172.271,60.2005,-271.824,835.5,244.044,159.733,FALSE,-34.3260951690623,1.21036192233676,"5"
export_early_B3_B03_CD8 _2020-06-16,169.354,201.714,220.704,478.852,925.895,606.095,-55.6843,26467.9,1743.82,175.806,304.322,FALSE,36.2599904577937,34.5965164705301,"19"
export_early_B3_B03_CD8 _2020-06-16,113.154,379.711,402.09,6539.86,148.489,252.252,152.399,1459.55,638.015,247.499,172.337,FALSE,-47.7614380105281,-4.36137049201034,"7"
export_early_B3_B03_CD8 _2020-06-16,9480.56,116.616,255.735,291.468,518.275,-81.5264,121.52,16896.1,604.301,-3.32646,53.4345,FALSE,41.3262991541517,10.9421692637752,"21"
export_early_B3_B03_CD8 _2020-06-16,196.261,184.792,119.29,1478.56,1027.54,298.631,43.2989,3365.04,848.544,167.079,45.3606,FALSE,-17.064186534777,12.5166137282626,"4"
export_early_B3_B03_CD8 _2020-06-16,628.412,34.7457,197.272,466.015,1816.43,169.973,-281.351,374.931,601.967,20848.2,-251.502,FALSE,21.6720430835703,-3.21054118384961,"15"
export_early_B3_B03_CD8 _2020-06-16,1507.14,128.334,33.1037,2380.73,1543.78,88.3094,-10.8498,-154.087,36.8927,1368.72,1571.65,FALSE,-3.68393790639891,-11.8152101055995,"6"
export_early_B3_B03_CD8 _2020-06-16,189.272,92.6056,272.376,586.332,1089.13,278.099,-38.4246,16572.1,3895.79,-14.0574,380.17,FALSE,24.0815258834881,35.6005891752867,"28"
export_early_B3_B03_CD8 _2020-06-16,9026.59,9.80157,321.884,477.516,1023.19,16.8561,-53.4356,11264.8,-18.3067,1620.07,658.22,FALSE,38.3122831521369,9.41690663052743,"29"
export_early_B3_B03_CD8 _2020-06-16,20845.4,-20.0081,63.3352,129.011,821.059,-292.6,-258.108,12044.5,4584.8,-160.897,202.188,FALSE,45.7300538029163,-4.99026068910547,"21"
export_early_B3_B03_CD8 _2020-06-16,6773.2,64.8092,134.827,3971.35,2082.31,-60.0828,30.5544,732.477,92.9699,1178.11,268.479,FALSE,31.9953736039107,-20.7598874147475,"1"
export_early_B3_B03_CD8 _2020-06-16,2689.96,73.2466,108.732,2052.68,1339.72,-27.7175,136.598,768.807,638.023,-5.19983,128.743,FALSE,0.612588899014351,-17.8259413114165,"9"
export_early_B3_B03_CD8 _2020-06-16,339.98,84.774,254.01,227.721,1979.38,422.271,-327.627,257.871,-179.182,26671.2,-331.793,FALSE,23.5434060121242,-4.06725967291141,"15"
export_early_B3_B03_CD8 _2020-06-16,-223.582,80.6816,-28.1489,763.802,1203.66,179.313,-40.4793,2281.32,3257.57,-238.304,5178.05,FALSE,-10.9250794642386,42.5396951980442,"25"
export_early_B3_B03_CD8 _2020-06-16,6136.63,88.7777,171.329,3892.19,2336.3,30.8085,-151.305,116.156,173.478,3578.05,3216,TRUE,33.4595544027666,-12.200583601292,"1"
export_early_B3_B03_CD8 _2020-06-16,8584.8,111.321,286.206,2883.54,1615.43,-97.0873,24.9247,-52.549,873.219,578.903,-27.2614,FALSE,40.9644698843813,-15.2366650491897,"1"
export_early_B3_B03_CD8 _2020-06-16,1021.49,-14.3083,216.029,92.2247,33.8352,568.829,20.8296,5230.2,185.408,349.596,2730.5,FALSE,-7.3297041106552,30.0463845141364,"2"
export_early_B3_B03_CD8 _2020-06-16,5599.98,414.416,912.356,3508.88,2012.59,234.94,162.752,534.591,616.623,628.868,132.629,FALSE,24.7112497055938,-19.9462114939997,"1"
export_early_B3_B03_CD8 _2020-06-16,3468.19,15.7198,71.6141,1399.39,935.599,-84.483,90.0365,62.3806,16.9903,73.3676,7527.77,FALSE,-10.7397040342584,33.2087434656928,"24"
export_early_B3_B03_CD8 _2020-06-16,9809.84,299.063,623.381,1726.35,1076.93,-22.5776,134.806,1123.96,70.3603,1312.51,329.019,FALSE,41.3884553146444,-10.6583580083406,"1"
export_early_B3_B03_CD8 _2020-06-16,408.362,44.5688,123.771,888.971,1071.32,87.1228,-197.716,3738.83,87.1868,5455.38,-22.3144,FALSE,6.43241563410576,-1.4301125508097,"15"
export_early_B3_B03_CD8 _2020-06-16,3354.68,200.129,2224.01,4523.17,1843.43,842.942,15.5815,657.686,270.254,1419.28,467.601,TRUE,4.79823045726077,-15.6884320351137,"11"
export_early_B3_B03_CD8 _2020-06-16,1196.83,177.104,188.939,16.8696,197.587,35.3917,37.6843,11610.4,135.093,1624.16,-10.8853,FALSE,28.9847180542125,16.9253604905211,"29"
export_early_B3_B03_CD8 _2020-06-16,17.7418,493.568,241.524,247.041,51.9666,110.936,50.172,-198.64,833.126,144.247,440.56,FALSE,-38.5315582624496,7.23464937696235,"5"
export_early_B3_B03_CD8 _2020-06-16,145.338,115.647,1787.59,185.081,357.155,473.857,71.8998,2201.37,1768.14,367.422,321.789,FALSE,-28.2123365637797,13.5136143617691,"5"
export_early_B3_B03_CD8 _2020-06-16,4841.13,99.836,65.4382,5344.42,1541.25,41.3305,-5.24605,-32.8276,213.084,2709.53,2516.36,FALSE,16.1948239090264,-21.2283842761708,"1"
export_early_B3_B03_CD8 _2020-06-16,3857.43,291.582,551.757,1648.76,598.954,179.449,-24.9569,106.074,317.704,1447.04,498.164,FALSE,8.44868998222212,-12.6356034630458,"6"
export_early_B3_B03_CD8 _2020-06-16,69.2744,257.018,415.363,283.966,339.822,609.838,0.407998,40744.3,672.212,-24.5843,261.642,FALSE,39.5629541393028,33.7307081217474,"19"
export_early_B3_B03_CD8 _2020-06-16,681.915,68.5022,192.496,250.371,1092.97,530.714,13.4548,8764,1142.42,215.456,-78.4403,FALSE,15.1471894306379,21.2524429159248,"8"
export_early_B3_B03_CD8 _2020-06-16,109.802,582.221,740.625,1227.75,1001.32,814.435,-46.9399,36621.9,589.459,17.3735,740.086,FALSE,37.4068294238007,32.7247908250004,"19"
export_early_B3_B03_CD8 _2020-06-16,5172.13,66.7914,115.889,3338.47,1632.81,44.0881,118.9,583.746,-77.0508,1128.61,-32.3689,TRUE,20.7903131916455,-19.6694983646952,"1"
export_early_B3_B03_CD8 _2020-06-16,-107.704,143.009,-123.624,225.205,170.871,477.837,-288.902,2402.2,7208.02,565.314,3123,FALSE,3.41658776508959,43.7786216219431,"27"
export_early_B3_B03_CD8 _2020-06-16,638.273,11.8252,1059.03,1294.92,1885.45,49.4256,29.4354,-113.153,45.1487,2.67736,1411.54,FALSE,-18.7663729156355,-14.7099348440654,"14"
export_early_B3_B03_CD8 _2020-06-16,204.989,34.4591,13.7415,88.8934,-10.4147,194.842,-121.315,6540.31,3156.95,77.1437,10756.7,FALSE,-4.62311543641325,46.9063675022606,"25"
export_early_B3_B03_CD8 _2020-06-16,-145.529,482.234,988.263,462.989,1077.55,3936.86,42.9419,50758,119.953,921.338,501.589,TRUE,38.047341641097,32.8016307297242,"19"
export_early_B3_B03_CD8 _2020-06-16,2831.84,135.612,198.256,3527.73,1171.98,64.2952,-9.07095,-44.3354,312.568,1899.32,184.664,FALSE,1.92773521038279,-15.5373693442487,"6"
export_early_B3_B03_CD8 _2020-06-16,9905.91,178.55,254.227,5760.52,2494.81,56.9215,-43.428,587.765,366.677,1480.81,913.57,FALSE,44.0049999367603,-15.3546834120462,"1"
export_early_B3_B03_CD8 _2020-06-16,404.814,127.079,233.457,145.569,439.94,553.663,-13.5529,23347.9,523.471,466.431,1248.42,FALSE,33.3229913761524,32.7090457749008,"19"
export_early_B3_B03_CD8 _2020-06-16,1117.95,104.878,139.614,57.8934,142.239,220.555,-30.5451,44.6545,791.529,240.958,736.722,TRUE,-32.1811231861485,8.99442644756113,"5"
export_early_B3_B03_CD8 _2020-06-16,768.901,109.54,131.241,216.023,-54.015,46.4173,5.30885,1654.72,255.974,403.278,6353.21,FALSE,-21.1692003714569,46.4862373199102,"22"
export_early_B3_B03_CD8 _2020-06-16,-55.6921,-31.6648,54.6906,148.342,227.504,252.372,-122.464,-782.595,1852.4,250.116,-8.31484,TRUE,-40.7447367101418,11.4880824474874,"5"
export_early_B3_B03_CD8 _2020-06-16,159.907,71.0504,121.263,407.024,843.918,165.987,9.45355,34.5088,48.7903,267.065,976.137,FALSE,-20.9969137351899,1.9386564067635,"17"
export_early_B3_B03_CD8 _2020-06-16,3926.74,164.823,455.871,320.808,870.284,124.472,62.792,16055.8,964.076,942.276,193.303,FALSE,40.4238318759436,16.9890399464291,"29"
export_early_B3_B03_CD8 _2020-06-16,3173.43,133.739,152.327,1264.35,1729.42,65.6164,94.5103,22.0884,31.9464,1330.02,1.89425,FALSE,4.37260738375802,-18.144466440365,"6"
export_early_B3_B03_CD8 _2020-06-16,6676.49,128.404,519.732,218.945,59.9764,91.1457,157.223,15935.3,1238.12,130.683,292.748,FALSE,39.9262586730964,13.0868340199548,"29"
export_early_B3_B03_CD8 _2020-06-16,383.754,73.4247,3.1124,-0.666922,1164.41,189.243,-78.9663,-331.636,1928,292.902,180.999,FALSE,-39.7611043709818,4.6637659794748,"5"
export_early_B3_B03_CD8 _2020-06-16,7938.54,142.669,327.765,8074.36,1636.39,-21.4353,-85.0574,-272.517,551.326,761.315,-171.365,FALSE,36.3446527179879,-21.4242220962582,"1"
export_early_B3_B03_CD8 _2020-06-16,2276.13,22.2496,139.919,2860.02,1409.69,85.7252,81.0717,-51.4149,249.342,1087.59,433.031,FALSE,-0.825104999642884,-16.1412315090004,"6"
export_early_B3_B03_CD8 _2020-06-16,429.123,122.041,161.349,421.408,53.2196,227.478,-38.7001,-376.165,1494.64,249.745,170.55,FALSE,-44.0776787358277,8.54314757019511,"5"
export_early_B3_B03_CD8 _2020-06-16,1956.83,172.432,79.4631,2608.61,2037.31,177.543,19.9185,446.505,51.9947,1938.49,957.397,FALSE,-3.18048057872729,-18.7852519475997,"6"
export_early_B3_B03_CD8 _2020-06-16,11.3113,160.555,593.376,98.0798,1535.63,733.513,34.6848,28887.2,717.09,-58.1937,275.234,FALSE,37.5693002164793,33.3156023216457,"19"
export_early_B3_B03_CD8 _2020-06-16,138.19,243.206,10.0776,141.046,430.319,1383.35,-139.769,19824.5,3992.25,200.383,287.871,TRUE,24.0298222399056,35.636533266458,"28"
export_early_B3_B03_CD8 _2020-06-16,-114.194,109.241,214.192,511.622,1945.23,482.933,-160.72,4628.12,129.004,11946.3,166.588,FALSE,18.1165763496268,-2.73386316448634,"15"
export_early_B3_B03_CD8 _2020-06-16,571.268,96.0344,710.249,404.535,670.592,130.767,25.9947,13885.6,183.244,2553.07,652.865,FALSE,23.6400657512491,26.0866569918282,"29"
export_early_B3_B03_CD8 _2020-06-16,395.846,199.293,486.691,182.002,236.459,88.4972,-56.1729,11753.9,2707.19,446.115,-21.3071,FALSE,19.1163301569345,29.9768710113782,"28"
export_early_B3_B03_CD8 _2020-06-16,1065.17,134.863,1581.72,154.83,709.208,143.39,458.273,36390.9,6019.1,-354.28,255.312,FALSE,31.9642372237844,31.2814775771753,"19"
export_early_B3_B03_CD8 _2020-06-16,194.127,113.497,195.202,253.181,106.724,92.1085,-45.8819,22741.3,2211.06,165.142,4107.87,FALSE,30.1768624247923,30.6602372947468,"19"
export_early_B3_B03_CD8 _2020-06-16,95.2862,138.43,111.507,604.153,1253.32,390.662,24.8305,6013.08,755.718,-41.7999,85.2266,FALSE,-0.816029282443915,17.8129311379131,"8"
export_early_B3_B03_CD8 _2020-06-16,176.744,133.132,236.128,122.158,1431.36,617.66,-31.4009,-403.431,1539.81,-19.9215,379.819,FALSE,-35.0037890387529,2.16963531851998,"5"
export_early_B3_B03_CD8 _2020-06-16,593.754,76.0848,311.478,380.073,949.424,60.5193,33.819,23.4435,101.718,864.891,7208.88,FALSE,-17.8442468397076,46.2832129415601,"22"
export_early_B3_B03_CD8 _2020-06-16,189.483,1151.27,232296,183135,72636.7,-408.384,-7823.32,-3361.3,43713.5,-29611.8,-148.212,FALSE,-5.80043697690761,-91.68118217295,"11"
export_early_B3_B03_CD8 _2020-06-16,712.605,61.2266,-13.3444,102.162,93.4708,128.289,41.0696,2389.89,4778.61,-120.981,5524.77,FALSE,-4.68877709797585,43.0184506221434,"28"
export_early_B3_B03_CD8 _2020-06-16,3976.78,13.1558,86.6888,614.394,513.682,67.1539,-60.4528,68.6086,591.762,88.6111,46.9954,FALSE,11.1050576910046,-13.6672490744176,"9"
export_early_B3_B03_CD8 _2020-06-16,138.424,32.2911,116.251,241.611,451.584,158.6,-133.294,2910.99,56.6103,2701.02,-18.8042,FALSE,-12.7811018948444,3.66371238838682,"17"
export_early_B3_B03_CD8 _2020-06-16,330.677,52.1705,70.1661,392.192,514.272,221.612,257.75,14456.2,3963.93,-188.046,726.552,FALSE,20.7023729218445,34.5982454143803,"28"
export_early_B3_B03_CD8 _2020-06-16,48.2107,202.594,433.172,145.709,450.584,141.265,90.5326,15030,379.16,-123.42,1009.3,TRUE,23.2360654114452,29.5766231932989,"19"
export_early_B3_B03_CD8 _2020-06-16,3290.22,98.7856,187.282,184.928,-101.634,81.0192,11.5173,2568.67,19.7817,88.2902,1701.59,FALSE,19.3735330597854,4.01976634556147,"9"
export_early_B3_B03_CD8 _2020-06-16,748.444,289.115,597.877,838.525,285.299,229.454,25.1929,8727.19,67.6499,1917.91,730.656,FALSE,15.9328426889444,19.5908099838433,"2"
export_early_B3_B03_CD8 _2020-06-16,4149.46,109.905,129.827,1951.75,1163.75,27.6224,10.1047,11.5176,244.646,1078.43,806.398,FALSE,11.9064704921198,-15.8180982976101,"6"
export_early_B3_B03_CD8 _2020-06-16,90.4586,119.43,308.01,47.1622,682.996,531.724,-52.3703,9957.38,95.4894,1282.39,1017.14,FALSE,18.3232095655482,24.5964066718561,"8"
export_early_B3_B03_CD8 _2020-06-16,1875.15,86.3591,64.392,2610.3,2065.39,183.483,-0.45416,-214.085,198.275,2245.01,497.741,FALSE,-3.93029132685106,-18.8107319733287,"6"
export_early_B3_B03_CD8 _2020-06-16,11.6918,82.1038,643.901,175.892,380.327,614.568,139.358,8927.48,1588.25,320.098,85.1743,FALSE,14.0734650556984,23.4810018186815,"8"
export_early_B3_B03_CD8 _2020-06-16,6063.66,103.435,83.1305,5613.31,2602.11,154.036,213.025,-21.8001,133.925,859.726,837.155,FALSE,28.9924743342979,-23.0810580949554,"1"
export_early_B3_B03_CD8 _2020-06-16,2999.04,67.8819,104.854,1753.7,1172.82,108.139,30.0049,95.4666,145.518,917.964,465.132,FALSE,3.43168953592504,-13.5986360069318,"6"
export_early_B3_B03_CD8 _2020-06-16,807.391,126.015,-99.1165,31.0368,35.0017,132.999,232.008,1673.9,6873.09,526.287,10768,FALSE,-0.0545242490890914,51.1338723783474,"27"
export_early_B3_B03_CD8 _2020-06-16,134.406,45.7031,208.587,891.06,1098.42,329.927,7.74635,5771.49,624.473,9.17402,125.22,FALSE,-2.62141838334013,18.0700710657687,"8"
export_early_B3_B03_CD8 _2020-06-16,6648.29,603.117,1455.82,1281.14,2595.96,240.612,-170.033,1734.77,654.162,4897.18,1391.9,FALSE,26.2364000672067,-14.0806086705845,"15"
export_early_B3_B03_CD8 _2020-06-16,382.651,347.756,168.584,114.938,-3.87638,861.517,-4.17878,15379.1,-60.0169,1145.18,1097.07,FALSE,27.6580349039517,28.7442927927075,"8"
export_early_B3_B03_CD8 _2020-06-16,289.458,147.279,214.304,253.091,513.511,753.839,15.5635,11494.6,2314.7,448.848,1159.38,FALSE,20.1578839962583,28.2123677683432,"28"
export_early_B3_B03_CD8 _2020-06-16,2998.4,170.344,189.694,160.3,913.442,16.036,11.8703,13565,552.498,275.036,154.35,FALSE,37.7245134348211,15.9429629413014,"29"
export_early_B3_B03_CD8 _2020-06-16,5320.85,507.105,87.9008,1921.41,721.874,533.198,-7.57316,-443.049,3973.37,135.178,181.73,FALSE,22.760855079209,-11.8313346313058,"24"
export_early_B3_B03_CD8 _2020-06-16,99.4172,100.063,-13.6474,201.49,294.957,737.932,-288.24,24362.5,6791.06,268.082,325.814,FALSE,28.6393312718861,41.4437733351553,"28"
export_early_B3_B03_CD8 _2020-06-16,2608.22,61.2149,212.714,4909.7,1835.79,4.50561,88.4444,328.65,201.136,991.227,1039.88,FALSE,1.97350807261617,-20.3191230645716,"6"
export_early_B3_B03_CD8 _2020-06-16,1035.1,155.806,196.974,4136.57,1895.37,127.207,45.2919,525.077,115.266,923.346,254.594,FALSE,-12.8173350901636,-22.6414328384037,"6"
export_early_B3_B03_CD8 _2020-06-16,307.241,50.3901,135.377,727.926,504.807,-86.9923,-160.639,5146.46,2891.72,3353.97,38861.1,FALSE,-5.20419588526591,63.8657382671467,"20"
export_early_B3_B03_CD8 _2020-06-16,162.152,310.514,247.232,102.928,1173.52,410.091,61.5755,22854.5,593.911,385.799,181.735,FALSE,34.7284734374219,32.5501367987899,"19"
export_early_B3_B03_CD8 _2020-06-16,844.47,-10.2683,26.235,85.0506,71.8222,368.025,14.0903,2458.16,2454.31,906.804,10877.1,TRUE,-6.02781988714083,53.561713649041,"25"
export_early_B3_B03_CD8 _2020-06-16,6947.33,135.128,385.055,4349.59,1634.09,169.064,57.4755,427.651,-87.7346,779.141,879.053,FALSE,31.4479357090807,-18.6129255713696,"1"
export_early_B3_B03_CD8 _2020-06-16,-300.255,119.431,31.8672,317.182,643.765,448.463,-237.819,17859,5415.49,218.913,2065.81,FALSE,26.1559394696381,37.5154781836341,"28"
export_early_B3_B03_CD8 _2020-06-16,9609.83,324.099,485.295,6620.11,1875.42,31.1548,73.826,711.56,581.323,507.286,144.068,FALSE,43.9768196056973,-14.7304631037403,"1"
export_early_B3_B03_CD8 _2020-06-16,-243.084,174.887,232.455,30.8836,1313.8,22.5844,52.7869,23862,1001.33,194.304,241.173,FALSE,35.3743426400106,33.4770981239116,"19"
export_early_B3_B03_CD8 _2020-06-16,7846.86,62.7185,109.755,2861.23,1612.11,-124.868,-36.0174,35.2175,86.9434,1111.89,34.5943,FALSE,37.8223436276173,-17.7366163268498,"1"
export_early_B3_B03_CD8 _2020-06-16,425.231,196.764,-107.701,146.441,236.313,1279.42,-301.376,11711.6,5037.98,517.644,2013.27,FALSE,18.3098870855674,37.9001154536549,"28"
export_early_B3_B03_CD8 _2020-06-16,2277.96,430.651,189.438,1648.59,209.096,288.681,-134.129,27221.1,5773.27,324.052,155.643,FALSE,28.513817650014,36.0305455293302,"28"
export_early_B3_B03_CD8 _2020-06-16,-215.334,53.9205,-12.2458,286.467,396.128,458.823,-144.73,8198.56,3754.01,-111.845,3166.16,FALSE,6.82720475928783,36.0420200353847,"28"
export_early_B3_B03_CD8 _2020-06-16,1255.52,129.142,283.162,2947.69,1517.21,74.7815,-24.0546,38.6155,64.1794,4007.63,38.0839,FALSE,0.0610662994394868,-11.3102334867314,"15"
export_early_B3_B03_CD8 _2020-06-16,3008.37,105.067,30.3808,1766.01,1050.58,173.397,11.0225,153.822,780.226,-139.197,188.976,TRUE,4.20819868195505,-23.5162600451074,"9"
export_early_B3_B03_CD8 _2020-06-16,1169.36,189.397,371.571,85.9774,962.511,282.568,-38.0192,60964.8,552.793,-66.2941,142.711,TRUE,38.5990730558836,32.8974203268548,"19"
export_early_B3_B03_CD8 _2020-06-16,1911.71,239.009,247.184,3317.63,1658.58,83.7633,25.677,-794.478,937.214,-288.63,277.508,FALSE,-4.09874028759165,-20.7167468434939,"9"
export_early_B3_B03_CD8 _2020-06-16,543.217,73.3666,173.162,250.298,748.768,120.763,23.6985,4006.56,232.564,594.72,3129.52,FALSE,-11.5925514025005,34.3305277303297,"25"
export_early_B3_B03_CD8 _2020-06-16,1318.14,35.9811,462.309,89.2972,473.286,231.446,-15.2407,11057.2,15.8657,1317.52,33.9471,TRUE,16.1272661670592,25.006938973211,"29"
export_early_B3_B03_CD8 _2020-06-16,349.247,120.608,-2.76276,434.767,1139.97,607.156,-141.2,10342.6,7009.66,670.559,2165.29,TRUE,3.04305925757312,38.4011220117919,"28"
export_early_B3_B03_CD8 _2020-06-16,751.018,138.751,442.769,147.285,561.776,219.731,107.489,13614.3,587.446,92.6465,34.3802,FALSE,24.8366998469844,28.2241158323116,"29"
export_early_B3_B03_CD8 _2020-06-16,-114.831,270.247,617.343,1277.7,2142.24,129.718,-37.441,9303,204.148,1232.29,577.505,FALSE,15.6183557154047,19.255645826099,"8"
export_early_B3_B03_CD8 _2020-06-16,80.2995,348.934,171.166,4.76092,806.794,180.477,-20.4231,12471.9,1477.07,256.888,280.047,FALSE,22.5802943932719,29.7238662081861,"8"
export_early_B3_B03_CD8 _2020-06-16,158.031,68.0131,366.988,391.244,1276.81,146.013,-35.7507,28969.4,1962.71,363.32,1068.34,FALSE,35.7112772448713,33.9743329421093,"19"
export_early_B3_B03_CD8 _2020-06-16,223.058,157.651,149.614,75.0919,1357.57,86.5535,-59.0074,-395.842,950.22,185.855,-164.275,FALSE,-30.8903944779032,-4.13924025651442,"5"
export_early_B3_B03_CD8 _2020-06-16,2840.32,72.1885,141.941,1655.12,1510.43,23.9667,108.979,88.1077,1043.02,406.952,-41.5571,TRUE,4.04702360545651,-23.9181831895481,"9"
export_early_B3_B03_CD8 _2020-06-16,-124.167,39.8073,364.547,266.038,644.942,198.094,-142.313,4844.55,739.198,12027.3,40.3199,FALSE,17.8926382838367,-2.15508945972347,"15"
export_early_B3_B03_CD8 _2020-06-16,59.9246,42.2791,153.164,116.786,-48.4656,506.09,-46.2795,-505.834,2344.96,235.722,310.839,FALSE,-43.793929954835,15.1177647918353,"5"
export_early_B3_B03_CD8 _2020-06-16,-123.142,131.369,164.318,77.6556,1072.48,699.835,-72.3825,626.201,714.945,97.3663,77.0876,FALSE,-26.6899574204798,7.25121226515256,"5"
export_early_B3_B03_CD8 _2020-06-16,5064.54,338.019,728.405,3730.61,2219.57,-19.7892,-33.4834,422.062,382.441,3521.13,725.6,FALSE,18.4695298234833,-20.0965745760558,"1"
export_early_B3_B03_CD8 _2020-06-16,961.474,82.5825,27785.8,-3912.03,157.262,764.45,-29.1793,5530.95,607.635,175.828,104.098,FALSE,7.62802969500396,11.2182424888305,"11"
export_early_B3_B03_CD8 _2020-06-16,629.706,178.161,46.9407,538.316,107.307,154.191,-34.3444,-157.469,1521.77,1515.93,4277.21,TRUE,-17.758817585528,42.8072141636082,"22"
export_early_B3_B03_CD8 _2020-06-16,3141.17,433.494,-661.893,130.141,1782.35,52.2561,-391.05,42080,18280.6,169.874,-14.9622,FALSE,19.0493370209043,52.7947380256327,"28"
export_early_B3_B03_CD8 _2020-06-16,684.758,176.217,372.76,170.723,319.692,92.4401,152.186,5737.67,-53.5505,1417.6,130.317,FALSE,2.81873682058264,13.7114390054982,"2"
export_early_B3_B03_CD8 _2020-06-16,6873.06,70.0519,319.566,5307.76,1837.22,70.717,48.3617,79.4976,-30.3394,1324.91,1054.27,FALSE,31.0057022609828,-19.7785371085328,"1"
export_early_B3_B03_CD8 _2020-06-16,700.22,127.544,32.8655,52.6071,156.124,984.097,21.5372,15030.8,2625.36,-140.384,199.445,FALSE,26.037408433243,31.1218490770718,"28"
export_early_B3_B03_CD8 _2020-06-16,-556.572,239.972,95.1772,232.65,1881.9,464.115,-36.7634,172.373,1324.65,168.073,1475.86,FALSE,-29.0197968247301,8.49656788133749,"17"
export_early_B3_B03_CD8 _2020-06-16,163.445,73.2108,262.008,78.7874,307.031,258.562,-54.2045,115.832,1087.77,447.82,264.815,FALSE,-36.92839924281,6.70705423167805,"5"
export_early_B3_B03_CD8 _2020-06-16,233.927,-3.69086,88.1072,38.1257,753.376,87.7337,84.0144,4088.09,3176.62,32.8331,9150.89,FALSE,-5.47645656604888,46.0911163701267,"25"
export_early_B3_B03_CD8 _2020-06-16,463.725,142.03,232.097,156.27,-80.8974,1115.86,213.591,6427.58,29.5561,377.036,6305.23,FALSE,-10.4126274340724,34.9469136541015,"25"
export_early_B3_B03_CD8 _2020-06-16,277.562,69.4194,19.3126,-59.1014,770.714,1310.22,43.1154,12421.7,8212.01,118.561,67.4907,FALSE,19.865866601244,41.0586976232204,"28"
export_early_B3_B03_CD8 _2020-06-16,1486.29,135.845,145.791,1599.65,1100.69,18.8499,-24.4344,37.2592,73.1596,1429.97,669.34,FALSE,-6.63950375034268,-9.48303828806023,"6"
export_early_B3_B03_CD8 _2020-06-16,1436.05,168.288,216.842,4887.16,1217.2,156.19,1.24505,429.036,317.021,746.065,701.718,FALSE,-8.27515973458105,-16.0165658948538,"6"
export_early_B3_B03_CD8 _2020-06-16,476.372,502.148,119.463,363.947,662.732,631.813,57.6234,21590.1,555.107,60.437,854.284,FALSE,32.5274274624621,30.8117215106534,"19"
export_early_B3_B03_CD8 _2020-06-16,1052.19,84.9262,401.674,2030.98,1053.51,255.536,20.7721,169.768,232.949,617.573,750.317,TRUE,-17.2091478232933,-11.7961497343118,"6"
export_early_B3_B03_CD8 _2020-06-16,6472.67,83.0296,89.7292,4548.42,1664.61,-127.718,37.5507,-59.4104,32.3012,-27.6307,12180,TRUE,2.71977021797518,62.8464150963266,"24"
export_early_B3_B03_CD8 _2020-06-16,313.627,474.974,208.521,1043.97,530.941,381.976,11.0041,1212.75,710.763,474.894,263.221,FALSE,-33.8185946139583,7.1244296865879,"5"
export_early_B3_B03_CD8 _2020-06-16,295.283,313.367,151.636,90.8199,700.408,471.728,188.503,11842.8,747.856,155.443,1482.81,FALSE,20.9928370616998,27.0988626884732,"8"
export_early_B3_B03_CD8 _2020-06-16,1125.61,262.623,236.494,2146.88,2320.8,162.527,89.7382,100.795,32.2886,645.187,1300.61,FALSE,-13.644020935626,-22.8760318979571,"6"
export_early_B3_B03_CD8 _2020-06-16,123.511,61.6906,384.309,119.752,472.19,832.305,239.154,3790.43,602.585,126.747,226.601,FALSE,-12.3909405471101,16.4679197787973,"3"
export_early_B3_B03_CD8 _2020-06-16,1047.08,281.001,809.548,1241.29,1245.46,160.695,-15.2342,888.482,307.56,2787.03,874.673,TRUE,-17.1880417078057,-5.64675885185974,"15"
export_early_B3_B03_CD8 _2020-06-16,198.231,3448.45,893.582,39.2378,262.364,2736.88,392.82,-326.896,1476.6,975.473,411.008,FALSE,2.49488811577972,9.25100076328309,"7"
export_early_B3_B03_CD8 _2020-06-16,230.807,65.945,119.273,179.412,828.313,210.272,-16.5198,253.045,1646.96,215.175,580.034,FALSE,-42.0260839930144,7.67148685181178,"5"
export_early_B3_B03_CD8 _2020-06-16,268.073,142.781,182.572,136.008,305.956,226.188,-24.5429,6749.93,1622.46,-144.417,1517.46,TRUE,-3.58255697146481,32.9363300676703,"10"
export_early_B3_B03_CD8 _2020-06-16,306.831,215.395,117.35,104.193,1151.6,1712.01,133.717,27261.1,1294.7,239.365,136.231,FALSE,37.5983904479038,34.7774328120603,"19"
export_early_B3_B03_CD8 _2020-06-16,1117.87,200.35,682.59,206.717,431.531,729.362,106.462,16365.1,572.84,215.457,222.327,FALSE,28.4426278383382,29.9923998983962,"8"
export_early_B3_B03_CD8 _2020-06-16,779.547,211.735,802.398,97.7267,205.934,181.141,35.6342,7421.65,587.502,153.713,256.961,FALSE,13.4484968163447,20.5813978432929,"10"
export_early_B3_B03_CD8 _2020-06-16,307.858,148.548,72.0601,217.518,617.77,185.047,-13.8917,1342.26,1157.22,231.809,171.488,FALSE,-31.4931068660301,9.18874339495103,"5"
export_early_B3_B03_CD8 _2020-06-16,332.777,449.57,712.475,55.5336,1881.84,908.002,-26.6264,6423.77,-0.330386,1495.64,91.7211,FALSE,8.16111508152018,14.8408985269303,"3"
export_early_B3_B03_CD8 _2020-06-16,452.538,162.444,642.451,378.76,1132.46,801.609,1.08787,11879.4,638.578,417.316,202.517,FALSE,22.8908063292702,24.5736514465972,"8"
export_early_B3_B03_CD8 _2020-06-16,717.883,251.505,289.495,4107.26,1048.78,198.74,-37.224,573.494,36.0423,904.276,1114.52,FALSE,-15.6888426644284,-11.485119954706,"6"
export_early_B3_B03_CD8 _2020-06-16,3532.61,107.973,178.826,1628.02,810.792,43.8297,16.128,136.151,2.83274,1206.15,-43.2438,FALSE,5.5334008964233,-14.2287131012956,"6"
export_early_B3_B03_CD8 _2020-06-16,663.295,93.6194,230.487,282.411,200.354,177.03,-95.0137,20219.3,892.362,339.039,1057.6,FALSE,31.0211379276638,31.5039327775231,"19"
export_early_B3_B03_CD8 _2020-06-16,439.131,184.966,146.324,53.5657,832.81,173.95,7.80328,672.315,-2.68442,1992.33,1166.78,FALSE,-17.2061566790637,-1.42735864350568,"17"
export_early_B3_B03_CD8 _2020-06-16,6257.87,75.8737,-50.8338,2814.08,1397.68,31.9473,-116.306,262.768,1911.75,315.353,202.905,FALSE,27.5627159842702,-19.9908018172851,"1"
export_early_B3_B03_CD8 _2020-06-16,320.525,217.953,330.443,114.314,192.969,384.542,-2.76394,11463.5,54.7097,1086.13,398.988,FALSE,21.7976349539302,26.1028348691547,"29"
export_early_B3_B03_CD8 _2020-06-16,-99.7195,673.147,175.243,63.5307,1236.02,1499.86,48.9056,10738.9,2364.35,20.882,1800.98,FALSE,18.2003717818438,29.617010168217,"8"
export_early_B3_B03_CD8 _2020-06-16,10628.2,227.305,111.571,2256.83,2085.39,-40.5422,-307.682,163.148,185.363,26774.9,-496.698,TRUE,22.5981139151951,-7.42041388568315,"15"
export_early_B3_B03_CD8 _2020-06-16,5096.83,181.014,94.8404,3695.43,2072.68,36.1327,21.1259,307.754,161.892,152.749,909.343,TRUE,18.570975444797,-20.8161525180015,"1"
export_early_B3_B03_CD8 _2020-06-16,1823.06,234.99,127.807,938.639,299.922,442.667,19.5413,14681.1,3448.11,141.882,1148.77,FALSE,22.5531022870454,32.351206445272,"28"
export_early_B3_B03_CD8 _2020-06-16,2730.28,202.658,314.752,3723.55,1312.21,183.673,65.9825,111.612,269.132,1044.4,1335.94,TRUE,1.74438220343818,-11.0403967943678,"6"
export_early_B3_B03_CD8 _2020-06-16,288.377,12.5867,387.294,331.776,766.097,329.904,-3.05795,5335.27,6.95129,931.93,-184.792,FALSE,-0.84037364896425,15.6728766027441,"2"
export_early_B3_B03_CD8 _2020-06-16,1013.1,194.59,147.212,470.192,765.403,74.1193,32.8913,9708.13,661.974,-45.5521,224.419,FALSE,21.4284941690311,23.0653880946546,"10"
export_early_B3_B03_CD8 _2020-06-16,570.594,77.1618,63.4697,1925.03,1380.32,80.1545,-30.5345,-44.0882,19.0546,896.221,328.41,FALSE,-16.161007557389,-13.4224184130256,"6"
export_early_B3_B03_CD8 _2020-06-16,1443.09,127.495,293.97,303.855,-40.5151,99.9834,317.617,25440,865.609,278.879,149.808,FALSE,32.8226269513151,32.7406029402863,"19"
export_early_B3_B03_CD8 _2020-06-16,518.147,250.226,750.983,395.683,423.285,242.19,-34.4566,6720.56,165.698,1592.97,379.4,TRUE,4.36917520688821,19.3364914063,"2"
export_early_B3_B03_CD8 _2020-06-16,230.841,164.612,-30.9037,225.047,218.251,781.507,-56.908,-89.1421,1426.28,23.6295,103.373,FALSE,-37.4118713146614,12.8070666139304,"5"
export_early_B3_B03_CD8 _2020-06-16,8867.88,14.0731,1000.05,3098.18,1720.72,310.018,52.5576,451.252,568.325,533.564,363.788,FALSE,39.4080616979621,-12.6209257393089,"1"
export_early_B3_B03_CD8 _2020-06-16,3721.74,-1.99389,163.013,2581.03,1673.56,24.7364,5.0777,507.476,-35.0483,1034.49,144.206,FALSE,7.78013133708595,-20.5014362719191,"6"
export_early_B3_B03_CD8 _2020-06-16,877.279,403.188,530.341,146.195,1159.75,405.993,59.9784,24747.9,1122.31,77.9014,208.836,FALSE,34.0977819040279,33.2050750124051,"19"
export_early_B3_B03_CD8 _2020-06-16,534.11,66.4927,456.253,31.8098,392.719,320.945,21.8623,14842.6,12.9377,4651.74,185.682,FALSE,24.6719564419364,22.7553860479069,"29"
export_early_B3_B03_CD8 _2020-06-16,1663.79,-25.6417,262.112,3153.12,1319.54,320.196,-72.3426,157.807,1949.04,333.539,18.965,FALSE,-16.9286289387699,-13.7413619334825,"9"
export_early_B3_B03_CD8 _2020-06-16,517.183,1009.15,323.66,110.335,30.562,1635.58,110.576,299.628,78.5672,968.424,151.954,FALSE,-15.7812175755087,12.4299077429376,"3"
export_early_B3_B03_CD8 _2020-06-16,505.896,168.377,447.806,291.293,346.395,2019.93,58.5511,8219.55,139.903,1152.07,-72.4055,TRUE,10.1863207901919,14.9279664663385,"8"
export_early_B3_B03_CD8 _2020-06-16,47.2245,70.9023,372.254,41.0756,850.12,1361.96,141.274,7470.61,300.73,355.248,779.163,FALSE,11.5196812490675,19.3627245976386,"8"
export_early_B3_B03_CD8 _2020-06-16,362.234,105.276,-4.4975,52.5626,276.511,1661.34,-65.9492,6358.79,2023.93,255.034,747.652,FALSE,8.74783017950463,23.9707191852697,"3"
export_early_B3_B03_CD8 _2020-06-16,2396,30.5143,174.289,886.423,882.754,16.7934,27.9171,217.551,638.783,64.6278,-48.7922,FALSE,-2.72155338640198,-13.0164693376141,"9"
export_early_B3_B03_CD8 _2020-06-16,1122.52,32.3786,483.078,140.8,-23.8188,161.909,-0.95478,7042.86,774.579,184.11,129.861,TRUE,5.62368319309334,22.4141402360765,"10"
export_early_B3_B03_CD8 _2020-06-16,216.549,94.9966,-93.9531,51.177,555.192,1168.18,-192.405,7423.09,9166.38,122.923,5135.15,FALSE,9.53931114746424,43.0249632131034,"28"
export_early_B3_B03_CD8 _2020-06-16,550.368,75.872,127.271,29.9874,1432.68,763.494,-2.18407,-17.8219,-22.9256,1310.79,3.78458,FALSE,-23.3806324117279,-4.87849271742709,"14"
export_early_B3_B03_CD8 _2020-06-16,4429.11,374.615,296.213,5471.93,1312.06,245.426,-110.091,514.148,714.769,325.795,201.929,FALSE,13.8884802972619,-20.8735342061379,"6"
export_early_B3_B03_CD8 _2020-06-16,375.575,319.596,1004.6,1071.51,722.291,652.007,81.3086,860.137,71.2454,985.148,368.357,FALSE,-28.600511507346,1.69284464279184,"3"
export_early_B3_B03_CD8 _2020-06-16,-9.76411,730.653,1943.51,125.687,223.896,346.796,223.773,12450.5,113.699,1440.41,292.807,TRUE,20.104323228967,27.68188466129,"29"
export_early_B3_B03_CD8 _2020-06-16,6164.07,191.246,35.2974,4510.92,2208.65,55.7376,83.1885,241.458,648.839,-307.135,368.955,FALSE,29.7313917416656,-21.9407038586693,"1"
export_early_B3_B03_CD8 _2020-06-16,152.789,84.7787,44.7393,9.96588,348.635,540.588,169.033,-63.4342,615.509,-92.6826,108.66,FALSE,-37.0914057226273,12.1231210243247,"5"
export_early_B3_B03_CD8 _2020-06-16,59.1497,69.4566,267.604,12.8638,248.547,667.497,-9.33766,6026.56,1371.73,254.278,566.209,FALSE,2.91755536479376,22.1875957982965,"3"
export_early_B3_B03_CD8 _2020-06-16,-45.5987,102.542,68.2151,6.85527,637.9,977.617,-64.5287,1724.59,1217.9,228.682,222.746,FALSE,-19.9052769593495,17.049472433615,"3"
export_early_B3_B03_CD8 _2020-06-16,2542.36,231.938,299.347,3076.7,1344.07,132.987,-35.3812,-303.312,165.957,1144.54,2239.76,FALSE,4.26005107519589,-9.68240367947428,"6"
export_early_B3_B03_CD8 _2020-06-16,1583.84,137.113,363.445,129.948,232.59,418.38,132.973,3871.31,805.491,137.274,125.732,FALSE,-0.750094861360021,13.993565578777,"5"
export_early_B3_B03_CD8 _2020-06-16,191.656,69.0816,299.707,340.825,607.007,780.281,113.086,16914.3,609.587,288.261,49.0092,FALSE,28.6571462521161,29.7037920539438,"8"
export_early_B3_B03_CD8 _2020-06-16,-161.743,63.3754,120.651,939.539,1262.36,219.381,127.418,196.668,974.443,407.046,291.706,TRUE,-41.2935016406661,0.585809486096257,"5"
export_early_B3_B03_CD8 _2020-06-16,999.457,92.6542,397.658,825.653,1098.82,540.403,32.8957,3484.78,608.171,185.332,147.443,FALSE,-12.181711670618,16.6694650596668,"4"
export_early_B3_B03_CD8 _2020-06-16,931.288,267.785,89.4466,96.853,594.14,1162.31,22.0353,28285.2,4677.97,31.4378,2099.85,FALSE,33.4403084490601,35.0361700720533,"28"
export_early_B3_B03_CD8 _2020-06-16,115.704,203.984,243.977,632.006,1729.79,753.568,47.2704,12703.7,651.609,137.66,757.486,TRUE,21.1846199325602,24.3594381477636,"8"
export_early_B3_B03_CD8 _2020-06-16,1987.42,167.957,108.109,3792.53,1260.76,55.5361,33.8069,124.69,145.471,421.234,705.943,FALSE,-0.550705278890323,-15.4687087332228,"6"
export_early_B3_B03_CD8 _2020-06-16,235.057,2414.57,1207.99,1172.61,987.064,489.303,694.515,13407.9,1928.23,404.601,392.369,TRUE,20.6066767833025,29.4033897264246,"8"
export_early_B3_B03_CD8 _2020-06-16,5283.04,206.049,268.925,4609.72,1632.37,-11.5672,-33.3059,414.015,8.52944,954.139,182.653,TRUE,20.7412677711141,-20.6347686461322,"1"
export_early_B3_B03_CD8 _2020-06-16,-230.736,81.9089,212.169,70.9305,-47.1074,229.869,-72.5407,3580.86,109.312,3805.41,221.036,TRUE,-12.0585582031755,12.5064728439512,"17"
export_early_B3_B03_CD8 _2020-06-16,457.974,181.656,-107.245,159.127,731.771,281.006,-156.857,20817.5,9796.21,511.801,4757.9,FALSE,24.5930741076405,39.5655507072472,"28"
export_early_B3_B03_CD8 _2020-06-16,881.924,175.403,286.789,364.768,557.408,741.949,10.1541,22686.3,423.184,259.795,1073.7,FALSE,32.3188111285356,32.4542321510235,"19"
export_early_B3_B03_CD8 _2020-06-16,591.581,96.1475,-357.416,89.2382,20.437,87.8915,-292.703,5698.37,10806,-356.18,4933.54,FALSE,9.9915742414768,44.5912114099362,"28"
export_early_B3_B03_CD8 _2020-06-16,439.396,153.71,262.158,585.171,970.154,-3.0337,-0.00740393,385.827,942.461,886.982,25586.5,FALSE,-4.51570549109577,61.2010813616501,"20"
export_early_B3_B03_CD8 _2020-06-16,-251.194,139.922,137.201,59.5494,163.382,143.343,0.311915,1973.7,895.873,60.7491,2525.41,FALSE,-22.8918299835882,34.576622150053,"17"
export_early_B3_B03_CD8 _2020-06-16,2000.14,138.323,529.893,2339.16,969.346,110.205,40.2172,429.193,39.3204,1833.04,511,FALSE,-4.50520596984325,-10.0790268132038,"6"
export_early_B3_B03_CD8 _2020-06-16,5089.53,146.396,108.57,4520.42,2266.76,-94.8543,220.998,739.42,87.7775,111.83,1463.75,TRUE,18.4097137215463,-21.430429154096,"1"
export_early_B3_B03_CD8 _2020-06-16,-252.408,136.604,156.138,164.207,164.154,587.677,29.7914,5539.57,3681.92,-28.7483,207.51,TRUE,0.757264308372501,28.0423858148729,"28"
export_early_B3_B03_CD8 _2020-06-16,535.072,279.698,171.86,548.038,1080.39,1571.95,97.3587,11759.9,687.059,288.981,42.5267,FALSE,22.5192267574389,21.0976732167767,"8"
export_early_B3_B03_CD8 _2020-06-16,5224.37,167.26,205.148,4623.88,2023.04,71.7085,89.3143,284.071,1194.32,132.677,59.7291,FALSE,22.0225803627557,-23.9764363743538,"1"
export_early_B3_B03_CD8 _2020-06-16,437.895,161.283,293.377,279.89,1253.03,433.85,-51.9396,13795.3,1214.72,124.949,2173.96,FALSE,24.4988399465418,28.2031670516014,"8"
export_early_B3_B03_CD8 _2020-06-16,5389.53,120.407,121.076,5101.06,3134.39,-129.145,-1162.68,61.3709,256.63,79353.8,-706.066,FALSE,29.3090516405608,-9.26599005661969,"23"
export_early_B3_B03_CD8 _2020-06-16,135.376,195.225,-240.371,192.627,-113.852,163.043,-456.01,-486.903,8137.4,362.648,14538.1,FALSE,0.608994744672593,51.9059381515909,"20"
export_early_B3_B03_CD8 _2020-06-16,146.591,82.7,101.689,180.823,102.339,842.341,52.3978,36.3212,2155.54,207.354,190.893,FALSE,-40.4962031239636,14.8421150765127,"5"
export_early_B3_B03_CD8 _2020-06-16,287.545,267.787,109.922,454.15,597.143,291.124,-354.486,28375.6,4992.75,315.585,1243.47,FALSE,33.2309402601652,36.1251867463823,"28"
export_early_B3_B03_CD8 _2020-06-16,368.16,572.805,363.739,410.134,1181.01,529.342,405.688,9836.21,76.6512,538.392,1355.59,FALSE,17.1621376826317,24.497244921132,"10"
export_early_B3_B03_CD8 _2020-06-16,123.4,198.667,225.033,393.995,862.052,1191.21,58.5962,7666.94,881.261,440.324,2239.36,FALSE,6.60603632221535,26.2860894665681,"8"
export_early_B3_B03_CD8 _2020-06-16,-362.463,75.5975,-60.9254,22.8632,774.661,305.149,-51.6973,4571.81,2675.59,15.8432,9682.48,FALSE,-5.63383436048702,45.3910557733598,"25"
export_early_B3_B03_CD8 _2020-06-16,91.7969,71.696,101.525,74.2886,848.711,487.322,55.2211,87.179,1307.77,1179.74,545.668,FALSE,-40.2496386006134,8.12358290908072,"5"
export_early_B3_B03_CD8 _2020-06-16,5469.92,388.276,495.316,79.6117,924.326,141.588,73.7769,11912.3,170.366,1010.49,92.2742,FALSE,36.5022550687288,16.5919354202562,"29"
export_early_B3_B03_CD8 _2020-06-16,53.732,103.171,182.062,87.0029,202.637,362.488,87.9232,6007.62,391.66,-11.0489,932.471,FALSE,-0.296259419799898,22.349953665292,"2"
export_early_B3_B03_CD8 _2020-06-16,701.112,201.447,414.115,537.96,-8.45995,790.857,17.9203,4676,263.484,1725.08,635.088,FALSE,-6.9607579252077,17.4622929171433,"3"
export_early_B3_B03_CD8 _2020-06-16,157.072,69.959,235.328,74.7634,1214.68,431.231,-407.474,555.274,-135.317,25694.3,28010.5,FALSE,-6.29967981918114,70.9783418347451,"22"
export_early_B3_B03_CD8 _2020-06-16,3263.52,196.135,166.886,5560.1,1221.9,152.4,53.8908,-109.387,69.8186,859.979,933.906,FALSE,2.88998580403368,-17.883791056147,"6"
export_early_B3_B03_CD8 _2020-06-16,760.504,433.776,372.998,727.056,478.954,1971.61,265.048,31794.1,3154.59,333.813,646.344,FALSE,35.176007714892,33.1764910378015,"19"
export_early_B3_B03_CD8 _2020-06-16,5779.32,42.2528,96.6447,5485.01,1875.32,47.0053,-37.5882,145.338,210.803,945.743,572.155,FALSE,23.8038419829735,-22.3971479466534,"1"
export_early_B3_B03_CD8 _2020-06-16,8666.74,136.706,332.714,1163.23,653.402,44.916,-4.83396,4761.22,61.3632,1239.51,168.154,FALSE,38.0493852177811,-0.613201345335086,"9"
export_early_B3_B03_CD8 _2020-06-16,476.29,34.7001,137.887,405.325,860.79,82.9559,87.0477,1051.01,285.736,663.13,47267.3,FALSE,-4.5218167440206,63.857427105888,"20"
export_early_B3_B03_CD8 _2020-06-16,4786.93,77.1685,380.397,3082.66,2034.1,156.043,-71.6301,111.055,166.408,534.077,796.63,FALSE,18.9314991136547,-21.3192391006298,"1"
export_early_B3_B03_CD8 _2020-06-16,4104.56,175.997,120.812,2872.93,1340.53,231.415,-28.5086,324.447,91.0273,816.123,737.188,FALSE,11.0316128536945,-17.7733077575863,"6"
export_early_B3_B03_CD8 _2020-06-16,3842.52,164.232,86.6607,3689.32,1972.12,70.3823,28.637,-256.046,553.029,-175.146,138.781,TRUE,9.98598777408094,-21.6040668935044,"9"
export_early_B3_B03_CD8 _2020-06-16,-237.914,193.55,284.274,11.8949,847.388,748.644,84.8464,11576.4,-75.5583,296.709,959.708,TRUE,18.1866696152832,25.4506012962692,"8"
export_early_B3_B03_CD8 _2020-06-16,6146.44,167.904,222.743,5128.63,1725.6,1.86556,29.2437,157.24,978.425,-85.5412,189.602,FALSE,27.5160389311315,-21.1859938459754,"1"
export_early_B3_B03_CD8 _2020-06-16,-92.2866,54.4828,205.851,29.5085,661.198,364.247,-14.6166,8921.84,17.6168,438.707,712.712,FALSE,14.9998082189504,22.7604643844982,"2"
export_early_B3_B03_CD8 _2020-06-16,3196.46,167.017,166.509,2492.51,1789.74,19.4292,0.232091,48.8841,44.8067,913.523,109.914,FALSE,5.73579615348186,-21.1846701235394,"6"
export_early_B3_B03_CD8 _2020-06-16,116.421,370.925,406.273,481.172,826.918,306.857,15.2103,8264.8,-10.2147,1388.56,295.047,FALSE,12.610435354689,18.4517326675255,"2"
export_early_B3_B03_CD8 _2020-06-16,3964.58,47.3103,56.8535,2309.76,1429.89,105.717,79.5713,180.992,234.84,753.913,733.487,FALSE,10.1106867067549,-16.8214414203487,"6"
export_early_B3_B03_CD8 _2020-06-16,1588.63,365.884,186.043,1127.47,2468.94,338.179,30.5131,10624.9,-15.8261,3567.5,103.682,FALSE,23.2376135461486,18.3809265920705,"8"
export_early_B3_B03_CD8 _2020-06-16,-393.898,320.526,8.56882,74.8747,1232.74,2135.71,-13.5871,14461.4,4831.14,125.368,687.428,FALSE,23.5142819116289,33.6179091011583,"28"
export_early_B3_B03_CD8 _2020-06-16,11.9169,125.736,65.243,57.4321,548.675,245.987,2.19849,4612.5,3461.17,-159.044,932.708,FALSE,0.275090321165174,31.9304854630758,"28"
export_early_B3_B03_CD8 _2020-06-16,9529.77,316.271,1407.62,5951.28,3966.24,1726.28,27.5721,96.5124,240.827,952.317,324.539,FALSE,31.8687488413466,-11.5316432811788,"11"
export_early_B3_B03_CD8 _2020-06-16,2778.23,165.913,212.125,2335.96,1274.71,38.5605,18.1892,261.727,102.733,1341.03,66.0585,FALSE,3.13357669384243,-14.9143304529324,"6"
export_early_B3_B03_CD8 _2020-06-16,1597.97,238.883,372.432,2817.72,905.391,187.424,-54.3776,331.469,84.6837,2467.18,2177.78,FALSE,-3.86765547090695,-6.19945128665043,"6"
export_early_B3_B03_CD8 _2020-06-16,3257.17,-8.41553,54.4726,755.196,744.648,93.4577,70.4556,-178.944,852.208,84.3748,49.3559,FALSE,4.50496872818985,-13.33042454027,"9"
export_early_B3_B03_CD8 _2020-06-16,1186.09,200.791,152.13,154.164,208.026,503.728,314.671,7322.72,2810.75,5.81771,410.579,TRUE,3.03150449630452,26.898701125976,"10"
export_early_B3_B03_CD8 _2020-06-16,91.2306,127.868,289.277,219.004,113.37,82.1119,2.53529,129.097,28.4772,1043.42,229.232,FALSE,-20.094363175424,1.84559133519155,"17"
export_early_B3_B03_CD8 _2020-06-16,4054.88,272.413,305.138,3150.02,1622.02,100.791,52.5413,287.25,87.5412,1146.41,571.772,FALSE,10.0689661581478,-20.2573925982639,"6"
export_early_B3_B03_CD8 _2020-06-16,403.193,122.781,-201.095,567.445,1166.53,110.361,-328.124,-281.599,7311.33,118.744,736.441,FALSE,-16.7697798414393,32.1539651279012,"27"
export_early_B3_B03_CD8 _2020-06-16,-323.701,304.538,136.421,62.0689,1563.96,2636.81,283.522,9444.18,3469.65,208.935,13822.9,TRUE,-3.63719730500604,52.4651718905432,"20"
export_early_B3_B03_CD8 _2020-06-16,19620,98.6971,238.744,108.449,277.562,-257.824,40.1819,5565.24,998.914,-167.572,293.453,FALSE,45.0385347600226,-2.30345068833583,"21"
export_early_B3_B03_CD8 _2020-06-16,-142.394,213.094,164.725,2480.9,1448.51,262.344,-8.30082,3119.15,225.84,1178.09,414.139,FALSE,-14.0987238420124,2.15963952042561,"4"
export_early_B3_B03_CD8 _2020-06-16,583.689,53.416,88.5713,553.468,460.669,384.576,-381.252,12014.6,6383.26,109.342,928.556,FALSE,17.0341484892756,40.4671921024736,"28"
export_early_B3_B03_CD8 _2020-06-16,348.002,625.555,468.932,176.74,225.3,474.461,2.70841,9217.83,126.739,981.499,178.253,FALSE,18.599466800515,21.6340877250894,"8"
export_early_B3_B03_CD8 _2020-06-16,848.221,111.381,813.405,240.318,47.6049,79.3587,119.954,14923,1005.27,327.406,229.348,FALSE,23.8775565572726,30.1939308020897,"29"
export_early_B3_B03_CD8 _2020-06-16,3242.33,101.376,72.2992,746.747,645.665,39.1388,61.2047,271.708,662.281,-230.88,274.256,TRUE,-1.64077923969478,-6.45631475782332,"9"
export_early_B3_B03_CD8 _2020-06-16,606.702,64.609,342.374,164.595,1241.59,336.2,39.4011,11029.1,-40.989,982.528,-81.4127,FALSE,22.5932887282205,24.0657630175643,"8"
export_early_B3_B03_CD8 _2020-06-16,2916.79,209.52,289.939,1809.7,1588.92,248.443,-133.609,74.1134,106.787,2077.18,97.4503,FALSE,4.74336235947987,-15.4227271920432,"6"
export_early_B3_B03_CD8 _2020-06-16,100.473,144.925,232.906,147.165,67.7141,206.226,-7.70641,8478.97,602.315,230.748,200.444,FALSE,14.0771618383182,21.2939588810844,"10"
export_early_B3_B03_CD8 _2020-06-16,-33.7943,105.552,-106.444,81.5323,578.984,529.153,-77.2639,-54.7759,5362.93,2606.57,2167.15,FALSE,-8.33973761328838,40.3471763077879,"27"
export_early_B3_B03_CD8 _2020-06-16,6200.78,-14.6898,313.828,1674.48,1392.63,-3.555,-10.4656,534.107,59.1295,896.281,340.151,FALSE,28.1781452541463,-17.1920456196862,"1"
export_early_B3_B03_CD8 _2020-06-16,180.203,143.823,226.01,1.92291,846.032,726.368,55.4668,4960.28,1027.99,-110.442,125.354,FALSE,-2.6684195589592,16.3991579351583,"3"
export_early_B3_B03_CD8 _2020-06-16,923.518,77.6311,375.54,809.474,667.199,158.781,98.1678,9719.11,570.73,-77.2922,239.844,TRUE,14.9338060019388,25.686836041015,"10"
export_early_B3_B03_CD8 _2020-06-16,814.053,153.222,115.967,268.484,422.838,194.971,-123.304,4550.41,1828.62,3068.77,16200.3,FALSE,-6.52691656538855,53.217001889872,"20"
export_early_B3_B03_CD8 _2020-06-16,1068.68,457.701,320.862,2684.11,796.119,189.624,61.7153,1232.55,1138.15,99.938,74.2792,FALSE,-30.0758303719903,-3.37895064519288,"9"
export_early_B3_B03_CD8 _2020-06-16,24.8721,291.975,-244.627,181.484,363.297,746.774,61.0183,34109.4,13325.1,-273.973,617.177,FALSE,26.2356627821953,43.5449093646727,"28"
export_early_B3_B03_CD8 _2020-06-16,50.3534,452.666,165.43,335.216,386.687,915.34,126.909,16473.2,5681.61,-78.8776,725.786,FALSE,24.3863763659482,37.236296555157,"28"
export_early_B3_B03_CD8 _2020-06-16,-73.3654,-56.5585,148.464,241.525,1222.69,187.782,173.697,13888.7,-10.3836,1422.03,470.439,FALSE,24.0910804183638,28.1990572821831,"8"
export_early_B3_B03_CD8 _2020-06-16,-21.1095,137.865,99.2375,368.586,302.95,477.669,-57.8851,6433.4,1893.17,574.88,5271.12,FALSE,-4.18590836597098,36.7526610374535,"25"
export_early_B3_B03_CD8 _2020-06-16,3356.93,224.064,822.482,264.786,414.486,112.772,-178.026,16606.4,55.111,8749.81,9722.19,TRUE,-3.60286012980559,49.8732253884482,"22"
export_early_B3_B03_CD8 _2020-06-16,4363.75,106.481,-376.101,-20.6867,184.719,141.497,-270.136,7100.61,9904.86,330.232,13798.3,FALSE,3.34279903972885,54.1872238431503,"20"
export_early_B3_B03_CD8 _2020-06-16,78.5812,113.495,139.487,548.964,977.551,167.418,-7.97315,10324,132.651,1024.65,3.12817,FALSE,19.4057958512638,21.3326591902252,"8"
export_early_B3_B03_CD8 _2020-06-16,4460.31,135.809,388.214,4734.1,1965.89,129.464,53.1353,421.406,-6.22775,1144.1,124.378,FALSE,13.2416531553016,-23.5274030057951,"6"
export_early_B3_B03_CD8 _2020-06-16,60.4429,55.2347,30.1987,128.174,-53.8205,252.331,-170.793,693.529,5125.3,1225.45,7438.3,FALSE,-4.72757229845795,45.5261368587414,"27"
export_early_B3_B03_CD8 _2020-06-16,735.499,84.0535,141.118,193.955,28.3155,42.3209,-27.2399,-40.5942,270.152,57.0141,7453.54,FALSE,-17.426775283743,47.643988249838,"22"
export_early_B3_B03_CD8 _2020-06-16,-65.3817,173.827,580.509,132.188,784.82,176.911,-2.8218,14504.6,130.978,2833.12,334.692,FALSE,23.3959132605506,25.0567063695026,"29"
export_early_B3_B03_CD8 _2020-06-16,36.8181,144.83,355.475,207.17,-213.216,269.277,48.2312,4005.84,16.2522,981.61,1073.36,FALSE,-11.2156204284807,19.8232729352653,"2"
export_early_B3_B03_CD8 _2020-06-16,69.6954,86.3082,324.463,994.708,1665.63,198.334,33.301,3710.21,640.234,199.657,245.476,FALSE,-10.6586545631984,9.16992210950948,"4"
export_early_B3_B03_CD8 _2020-06-16,165.501,97.7306,563.341,306.197,163.426,809.399,-27.4466,35661.3,3273.8,92.272,15.1911,FALSE,37.0002990665276,33.2862721862171,"19"
export_early_B3_B03_CD8 _2020-06-16,309.188,49.5141,210.288,547.763,1707.61,384.922,-70.7087,6659.09,43.616,3001.4,186.248,FALSE,9.48601855722253,12.2781918415204,"8"
export_early_B3_B03_CD8 _2020-06-16,490.178,70.6344,321.858,37.9801,270.253,245.987,130.752,23530.6,550.434,453.956,-19.8368,FALSE,34.2740197667388,33.0365465314462,"19"
export_early_B3_B03_CD8 _2020-06-16,1254.09,274.494,365.358,2717.48,2760.43,167.776,-29.5096,344.923,243.427,1023.76,550.504,FALSE,-13.2127928738865,-28.2172883636436,"6"
export_early_B3_B03_CD8 _2020-06-16,-251.211,79.6513,261.528,295.288,1972.2,872.146,9.09757,4746.75,205.879,600.413,971.116,FALSE,-1.86871545272782,17.9843919882569,"3"
export_early_B3_B03_CD8 _2020-06-16,3.69551,222.711,157.623,757.81,530.707,559.654,-82.8989,15025.2,865.36,331.121,236.03,FALSE,25.7240654616544,29.8811676344908,"19"
export_early_B3_B03_CD8 _2020-06-16,251.775,88.5147,272.161,243.825,427.921,634.24,198.898,11677.9,5486.6,211.832,1860.21,FALSE,16.9122429411064,37.204831235811,"28"
export_early_B3_B03_CD8 _2020-06-16,6905.71,191.419,1376.04,300.604,81.2548,100.479,175.201,28089.1,1037.06,69.5095,195.573,FALSE,41.5975324063424,17.8063354800209,"21"
export_early_B3_B03_CD8 _2020-06-16,38.4955,108.326,186.999,194.722,2240.24,250.086,-188.312,1038.59,189.894,11760.1,-191.718,FALSE,17.6522755544031,-3.07018284128287,"15"
export_early_B3_B03_CD8 _2020-06-16,85.8552,106.674,121.488,388.12,501.294,257.287,-35.8483,-123.865,1053.23,185.747,47.8429,FALSE,-37.7911821183132,3.80156920786318,"5"
export_early_B3_B03_CD8 _2020-06-16,709.92,45.6465,-133.005,99.2535,450.376,75.6705,106.313,-379.281,5752.87,416.195,7366.48,FALSE,-6.65665197439044,47.4188773177162,"27"
export_early_B3_B03_CD8 _2020-06-16,3146.72,137.227,340.157,4510.93,1580.7,275.697,66.5777,258.484,133.105,1287.97,1608.06,FALSE,2.05926472255195,-16.2633645004957,"6"
export_early_B3_B03_CD8 _2020-06-16,5034.8,161.632,406.389,1189.61,1012.38,-19.6798,37.988,-96.7509,982.98,200.124,-70.0331,TRUE,21.2838926410501,-16.6799326280406,"1"
export_early_B3_B03_CD8 _2020-06-16,8015.85,209.301,234.851,3549.94,2102.07,-96.6927,119.565,171.825,5.4739,1070.83,-39.1707,FALSE,40.3035171369742,-17.068366157997,"1"
export_early_B3_B03_CD8 _2020-06-16,6877.77,86.732,233.262,2636.11,4040.24,74.6572,89.9302,592.938,-20.8807,918.369,344.448,TRUE,34.3359706865977,-25.4716041622307,"26"
export_early_B3_B03_CD8 _2020-06-16,281.762,155.732,-131.174,259.769,307.511,-35.8067,154.503,1107.02,5642.75,600.515,43371.2,FALSE,-6.75766184174098,64.3739360805248,"20"
export_early_B3_B03_CD8 _2020-06-16,4013.09,146.556,324.562,4501.61,1179.92,189.047,-65.4733,119.574,167.555,3471.12,3663.46,TRUE,4.28199311245653,-7.47858693910756,"22"
export_early_B3_B03_CD8 _2020-06-16,426.55,63.915,-35.1726,239.645,216.556,635.282,-22.9401,17036.7,7394.94,358.768,4291.33,FALSE,21.0516664130597,40.5608440590633,"28"
export_early_B3_B03_CD8 _2020-06-16,1937.1,71.0788,102.548,2711.02,1397.45,147.248,14.1708,507.891,724.268,417.307,211.237,FALSE,-6.23380133236417,-17.8252933378915,"9"
export_early_B3_B03_CD8 _2020-06-16,4662.19,185.383,298.991,4109.15,1996.87,131.527,-40.1441,594.586,300.189,1199.3,352.124,FALSE,16.114840219006,-23.3872707310888,"1"
export_early_B3_B03_CD8 _2020-06-16,515.188,30.411,-4.06404,187.934,515.989,588.308,92.8844,5150.3,5326.47,-26.7584,1717,FALSE,5.60526955863455,38.2165961487484,"28"
export_early_B3_B03_CD8 _2020-06-16,353.323,368.588,78.3292,74.0427,659.317,235.918,-55.4585,17734.2,2723.47,230.896,409.071,FALSE,27.334960486688,34.3486469983512,"19"
export_early_B3_B03_CD8 _2020-06-16,30.6202,37.0093,-36.3085,122.444,431.046,490.091,-5.92107,-678.484,2807.12,510.001,433.262,FALSE,-44.1173182434719,14.3080632013358,"5"
export_early_B3_B03_CD8 _2020-06-16,96.6194,145.774,208.443,281.976,205.023,905.152,12.7431,360.67,-8.78213,949.662,141.949,TRUE,-31.0939433232467,17.0518456844413,"3"
export_early_B3_B03_CD8 _2020-06-16,597.9,44.8425,146.236,75.6916,894.757,319.066,19.2523,961.182,233.212,354.583,6765.2,FALSE,-18.7066051410625,46.1105213460426,"22"
export_early_B3_B03_CD8 _2020-06-16,3019.37,133.981,-158.825,814.395,2806.62,-434.588,-516.725,-1364.3,1821.21,141219,-1245.56,FALSE,30.3727268650973,-6.77484126003402,"23"
export_early_B3_B03_CD8 _2020-06-16,2911.41,763.425,-730.548,106.209,889.997,109.558,-60.1644,27044.4,18603.4,-288.74,2749.74,FALSE,17.4247394362761,51.009224060664,"28"
export_early_B3_B03_CD8 _2020-06-16,375.572,68.2545,-230.727,6.9918,103.494,599.11,-334.018,6621.03,11149.3,24.006,9474.98,FALSE,5.8316361827858,49.3109754315554,"28"
export_early_B3_B03_CD8 _2020-06-16,6472.17,244.874,411.908,3175.87,1391.21,175.861,-3.7585,511.836,358.465,1707.94,-36.978,FALSE,27.6353862289028,-19.3739864321841,"1"
export_early_B3_B03_CD8 _2020-06-16,336.507,141.269,816.911,49.2716,-10.434,914.453,404.275,3009.02,1413.18,315.307,1908.48,FALSE,-13.8804209189515,26.4933977316582,"5"
export_early_B3_B03_CD8 _2020-06-16,-82.495,769.032,1688.3,-38.667,2493.3,549.931,484.55,13136.6,706.76,293.529,113.126,FALSE,24.8807812565335,22.9496982724205,"8"
export_early_B3_B03_CD8 _2020-06-16,1284.35,149.471,125.687,316.205,1360.46,947.109,-478,4560.92,541.358,49808.5,-225.348,FALSE,24.3974884613252,-3.82962458335399,"23"
export_early_B3_B03_CD8 _2020-06-16,4423.79,82.797,114.122,3043.88,1335.51,195.126,-31.8125,-47.2155,181.078,397.494,905.96,FALSE,14.3603124695518,-17.3506047418073,"6"
export_early_B3_B03_CD8 _2020-06-16,164.077,32.3331,48.0528,118.203,526.316,564.693,-91.2994,153.338,2327.27,283.452,2124.9,TRUE,-12.383992460388,40.6399157400237,"27"
export_early_B3_B03_CD8 _2020-06-16,6367.12,444.331,186.412,6814.08,2465.76,265.546,278.719,596.428,2240.55,187.072,222.17,FALSE,30.0117101501002,-21.5423160599807,"1"
export_early_B3_B03_CD8 _2020-06-16,3499.54,221.431,184.581,3617.67,3042.57,153.798,20.4106,371.185,804.524,474.847,-35.8201,FALSE,6.10414604645603,-38.4468874481882,"16"
export_early_B3_B03_CD8 _2020-06-16,308.579,146.455,-4.05076,107.232,189.318,458.743,-122,1111.6,3482.02,-173.052,-5.65756,FALSE,-34.8676264441528,20.7334109333869,"27"
export_early_B3_B03_CD8 _2020-06-16,4157.4,187.658,313.101,120.608,432.157,511.04,-128.591,1429.96,9.96038,13519.5,-59.3499,FALSE,18.8269793725754,-5.69787522434594,"15"
export_early_B3_B03_CD8 _2020-06-16,5799.91,99.7973,316.125,3706.63,1069.67,-4.31335,-85.3134,500.471,332.551,1443.35,10.2439,TRUE,25.1198597195186,-19.1156405073281,"1"
export_early_B3_B03_CD8 _2020-06-16,-69.4241,65.6723,-246.945,161.688,431.722,312.82,-343.829,-716.693,8155.03,1016.3,11019.2,FALSE,1.10236562119131,50.0760142122809,"27"
export_early_B3_B03_CD8 _2020-06-16,230.021,35.1142,-168.926,29.6149,198.029,1251.94,58.845,4850.3,4542.99,39.1753,795.75,FALSE,4.49042414117771,34.6936679189761,"28"
export_early_B3_B03_CD8 _2020-06-16,1867.74,181.014,42.5289,31.3759,41.6852,195.43,-73.9431,6515.5,3995.58,296.468,4878.57,TRUE,-1.60239467620427,43.3310475208448,"28"
export_early_B3_B03_CD8 _2020-06-16,2336.46,119.308,237.775,3840.23,1687.62,90.0649,-26.5986,176.678,239.463,1934.89,-49.2551,FALSE,1.41062357386811,-19.5656085537982,"6"
export_early_B3_B03_CD8 _2020-06-16,374.151,229.791,351.553,228.908,235.134,323.447,41.3312,17262.5,144.869,77.2111,2979.34,FALSE,27.107535410158,30.6469465579716,"19"
export_early_B3_B03_CD8 _2020-06-16,172.775,477.238,225.489,40.9214,525.995,283.211,12.7674,9772.46,3465.11,370.569,3684.81,FALSE,9.48190722480928,35.9082052715457,"28"
export_early_B3_B03_CD8 _2020-06-16,1639.43,61.3048,317.307,-20.5537,281.803,-61.8646,-24.4908,4943.19,-16.1402,5884.52,4830.42,FALSE,-2.83838812528832,22.0895836688566,"22"
export_early_B3_B03_CD8 _2020-06-16,-79.1529,229.785,253.071,78.1241,618.587,193.14,9.22686,8051.82,655.526,184.931,239.55,FALSE,11.4769351563218,20.5632604129702,"10"
export_early_B3_B03_CD8 _2020-06-16,2170.07,177.672,210.496,7916.48,2204.77,107.694,-61.2991,220.851,184.394,999.912,39.282,FALSE,-0.801258480518811,-31.7342241609148,"6"
export_early_B3_B03_CD8 _2020-06-16,1129.44,170.845,226.299,466.186,-237.326,177.713,104.22,6613.17,980.63,312.145,3333.45,FALSE,-3.7083312020446,30.4540724720985,"25"
export_early_B3_B03_CD8 _2020-06-16,484.046,120.286,251.805,577.735,580.736,422.957,26.3562,417.151,569.97,573.24,-20.1469,FALSE,-31.7834897024969,3.00855209695493,"5"
export_early_B3_B03_CD8 _2020-06-16,195.299,91.348,-46.9931,67.976,381.837,495.616,-9.20506,5251.76,2593.19,-26.3989,717.186,FALSE,2.24655612005755,26.6137123990849,"28"
export_early_B3_B03_CD8 _2020-06-16,121.851,195.43,215.815,93.8852,381.493,968.104,-188.557,18573.3,5220.92,182.471,184.279,FALSE,27.2790405076619,38.8212928642906,"28"
export_early_B3_B03_CD8 _2020-06-16,79.0279,878.417,611.469,-165.772,3002.97,4552.17,29.6404,19516.8,604.704,194.998,112.605,FALSE,28.918298410585,23.1919997705816,"19"
export_early_B3_B03_CD8 _2020-06-16,3075.54,-12.2454,222.237,2523.78,1612.06,-9.18279,-19.5299,-295.481,298.429,1183.72,19.5963,FALSE,4.9714696565942,-19.0432005846515,"6"
export_early_B3_B03_CD8 _2020-06-16,102.216,125.599,922.174,182.5,376.675,997.782,76.2778,8881.95,48.0185,538.399,1474.6,FALSE,13.2244678030376,25.1928654597134,"8"
export_early_B3_B03_CD8 _2020-06-16,4359.31,97.2555,147.317,3466.34,2150.39,234.144,-111.239,213.845,-3.95676,20055.7,-954.955,FALSE,23.0473812786618,-7.05334336992269,"15"
export_early_B3_B03_CD8 _2020-06-16,152.739,68.6073,383.417,26.1566,530.342,133.913,30.2442,-30.4479,141.254,450.144,1991.5,FALSE,-24.1213233377683,29.7503880373884,"17"
export_early_B3_B03_CD8 _2020-06-16,1773.2,113.82,155.876,3544.55,1739.29,135.141,63.2282,194.883,552.252,205.148,64.9951,FALSE,-6.29532704273197,-22.9823051490446,"9"
export_early_B3_B03_CD8 _2020-06-16,5223.29,99.6112,311.901,2475.34,1469.47,-67.2406,39.1154,193.59,15.5906,1690.61,258.081,FALSE,19.9029028377901,-19.8308197144702,"1"
export_early_B3_B03_CD8 _2020-06-16,3723.96,31.6927,197.941,4342.35,1944.03,0.511525,-66.2411,163.244,80.1059,833.794,1032.88,FALSE,9.2976968118186,-21.2070382333391,"6"
export_early_B3_B03_CD8 _2020-06-16,5516.9,113.551,205.573,9125.56,2678.95,-55.1975,48.7167,-60.1275,-145.762,1708.45,-3.11924,TRUE,20.2836274718876,-44.3453375294839,"1"
export_early_B3_B03_CD8 _2020-06-16,327.7,59.7237,120.612,157.631,144.205,102.896,87.4188,3710.95,92.9074,337.436,19909.3,FALSE,-4.63709308601775,58.8753163640802,"20"
export_early_B3_B03_CD8 _2020-06-16,1093.3,85.6589,35.681,108.604,454.82,246.147,-14.3657,15045.2,5613.12,-68.4231,196.151,TRUE,21.7645002876655,34.4011654285558,"28"
export_early_B3_B03_CD8 _2020-06-16,-126.72,70.9516,142.697,31.634,201.82,241.978,39.4053,-21.82,581.182,13.998,491.603,FALSE,-33.8155734907504,13.3585649550995,"5"
export_early_B3_B03_CD8 _2020-06-16,2499.59,117.93,288.776,3245.25,1766.49,104.232,9.0539,-291.826,-32.9604,1243.75,-30.2542,TRUE,-3.45309196507421,-18.1617447175045,"6"
export_early_B3_B03_CD8 _2020-06-16,-239.322,232.466,897.93,94.3315,-125.913,317.083,131.705,15886.1,750.826,240.792,53.7512,TRUE,24.1692931741822,29.6870558610514,"19"
export_early_B3_B03_CD8 _2020-06-16,6217.24,321.967,807.812,2971.92,1819.09,-16.9606,-26.4113,852.246,341.202,1486.56,788.707,FALSE,28.2085503605875,-20.4398454195407,"1"
export_early_B3_B03_CD8 _2020-06-16,536.675,195.295,158.912,190.107,1633.52,146.826,106.596,1760.47,49.1938,918.388,105.82,FALSE,-22.7459948995908,-3.75473311065544,"14"
export_early_B3_B03_CD8 _2020-06-16,1305.89,931.883,-61.382,3885.7,332.255,321.391,69.5978,-538.258,4434.65,-19.8378,143.837,TRUE,-44.1620008816883,17.2043012264196,"7"
export_early_B3_B03_CD8 _2020-06-16,1879.52,31.8924,88.9901,2155.01,1399.11,144.214,64.6135,151.659,827.108,-126.026,38.1656,FALSE,-7.54654390881991,-17.8318779705533,"9"
export_early_B3_B03_CD8 _2020-06-16,154.141,596.668,239456,193469,22667.4,60.4489,-526.33,-2484.15,4622.42,-8818.52,-700.833,FALSE,-25.5162395204897,-84.1329214849111,"11"
export_early_B3_B03_CD8 _2020-06-16,1464.51,187.109,-312.626,36.3453,709.358,1062.73,-294.273,11304.8,11177.1,136.719,3437.24,FALSE,15.2615698806467,45.1422382417615,"28"
export_early_B3_B03_CD8 _2020-06-16,160.948,235.73,369.751,436.763,2.19836,1452.18,43.6603,14007.5,1258.15,103.193,86.7164,TRUE,22.5715092705927,25.6351130631078,"8"
export_early_B3_B03_CD8 _2020-06-16,394.001,130.233,213.351,93.6385,1417.7,548.231,-55.6933,5109.33,221.635,3088.92,6.04102,TRUE,-9.39829633711491,12.1990697816986,"3"
export_early_B3_B03_CD8 _2020-06-16,552.605,132.647,296.413,24.2488,235.474,864.633,-42.6589,5341.27,158.904,2929.66,75.2619,FALSE,2.63889081493669,15.4805168142049,"3"
export_early_B3_B03_CD8 _2020-06-16,632.812,172.077,140.618,595.51,1113.25,246.457,51.3383,163.887,16.0374,2565.9,160.355,TRUE,-25.4205121657577,-4.99138995150607,"14"
export_early_B3_B03_CD8 _2020-06-16,826.976,135.324,414.485,92.3,230.516,97.8096,15.5916,6810.98,137.65,1222.61,1282.45,FALSE,9.42475892542515,19.784930436736,"2"
export_early_B3_B03_CD8 _2020-06-16,1137.21,267.213,443.501,4487.36,2196.65,692.324,115.976,334.686,238.141,2283.38,1920.1,FALSE,-9.76262337076096,-14.5005174072187,"6"
export_early_B3_B03_CD8 _2020-06-16,650.632,80.4081,251.943,123.694,77.0775,854.4,4.2608,2422.89,64.6097,1497.98,891.861,TRUE,-23.2768919488494,23.2201805905254,"3"
export_early_B3_B03_CD8 _2020-06-16,-205.96,112.451,588.382,103.431,187.231,1484.99,22.3301,289.508,163.78,104.771,2039.4,FALSE,-21.5365799033787,23.1484626805228,"3"
export_early_B3_B03_CD8 _2020-06-16,98.7788,246.957,-10.7515,80.8795,547.091,200.748,-173.25,9070.31,2023.29,29.3584,223.29,TRUE,8.13012944868545,24.3711418490702,"10"
export_early_B3_B03_CD8 _2020-06-16,-56.9671,69.6652,258.359,658.838,1316.99,249.791,-191.093,2080.35,41.9848,14939.9,-30.2665,FALSE,20.5904442743709,-6.43400306629718,"15"
export_early_B3_B03_CD8 _2020-06-16,242.156,77.8838,478.613,-131.283,2026.35,865.877,133.538,5805.53,60.5315,809.086,1744.12,FALSE,2.73456924844705,20.5583454290893,"3"
export_early_B3_B03_CD8 _2020-06-16,2523.78,103.255,183.121,440.796,1337.1,184.461,43.2843,5198.47,589.794,27.125,290.877,FALSE,19.7082491407581,10.0407951294955,"4"
export_early_B3_B03_CD8 _2020-06-16,5115.53,328.02,263.973,1816.23,557.455,215.705,57.985,1019.69,981.407,210.464,57.8833,FALSE,21.8654152863762,-12.4957316242776,"1"
export_early_B3_B03_CD8 _2020-06-16,-397.074,100.746,185.886,253.811,467.767,1219.98,-25.5739,18958.3,7060.58,1127.94,4012.87,FALSE,22.9150925018855,41.4800087773332,"28"
export_early_B3_B03_CD8 _2020-06-16,5128.17,250.859,292.821,6176.38,1852.29,-19.7865,-77.0743,-133.256,291.205,2639.98,2214.04,FALSE,17.3486332302405,-24.0112872741135,"1"
export_early_B3_B03_CD8 _2020-06-16,4607.43,30.4256,300.199,164.364,635.2,136.051,-69.745,13515,563.306,74.6562,303.758,FALSE,38.6126655594936,16.0831514251866,"29"
export_early_B3_B03_CD8 _2020-06-16,614.086,174.243,221.983,132.396,58.9369,108.56,35.3847,2642.33,1672.5,221.123,-12.5844,TRUE,-22.2478153323319,15.3406974282387,"5"
export_early_B3_B03_CD8 _2020-06-16,3158.39,201.252,246.314,3666.5,2219.52,70.1593,16.3401,215.671,592.773,81.6846,56.4731,TRUE,3.53005264215936,-20.9043412233291,"9"
export_early_B3_B03_CD8 _2020-06-16,4381.65,170.161,155.471,334.239,3663.78,-184.498,-1554.54,87.0088,404.094,105933,-616.447,FALSE,30.4982730667343,-8.53061228855606,"23"
export_early_B3_B03_CD8 _2020-06-16,11933.4,324.05,573.535,155.755,146.905,141.555,67.0075,5231.8,37.4423,896.986,535.058,FALSE,41.3317850902624,-1.42687102945709,"21"
export_early_B3_B03_CD8 _2020-06-16,333.433,80.6391,177.933,269.408,705.013,440.648,290.43,15925.1,7315.42,-36.1901,1006.68,FALSE,20.990846583041,39.5715934113813,"28"
export_early_B3_B03_CD8 _2020-06-16,2191.99,189.618,239.657,4022.32,2537.72,155.748,42.8492,549.71,855.449,231.226,29.2065,FALSE,-5.39975654249542,-33.9661734417043,"9"
export_early_B3_B03_CD8 _2020-06-16,-94.0412,177.939,226.193,175.839,999.179,1104.15,159.13,5514.3,4447.69,233.598,1210.1,FALSE,4.85898750329083,34.3784755590395,"28"
export_early_B3_B03_CD8 _2020-06-16,1254.46,36.4987,92.7027,1645.22,654.092,165.468,76.1207,117.124,147.691,82.8822,1821.89,FALSE,-12.6984123559494,2.76917390576917,"6"
export_early_B3_B03_CD8 _2020-06-16,327.256,36.5014,315.854,80.096,423.657,494.613,-2.82169,13241.1,883.965,94.0922,84.8238,TRUE,19.3700846200268,27.9581556247158,"8"
export_early_B3_B03_CD8 _2020-06-16,172.72,174.353,183.934,1751.43,1302.94,71.7887,-24.1826,1232.31,90.4837,1473.48,-45.9055,FALSE,-18.3821116931487,-8.13920885906085,"14"
export_early_B3_B03_CD8 _2020-06-16,262.664,173.973,3431.6,330.182,262.881,1342.22,507.253,411.136,151.273,1047.28,630.669,FALSE,-15.9285750257208,10.7123983579796,"5"
export_early_B3_B03_CD8 _2020-06-16,226.526,103.349,277.568,894.984,1099.61,308.528,-283.696,5178.36,-48.9172,21250.5,-216.683,FALSE,23.1025738647321,-6.79364295809334,"15"
export_early_B3_B03_CD8 _2020-06-16,-30.2592,944.917,335.327,68.5626,520.375,1423.92,195.595,160.585,-44.3518,562.031,1325.7,FALSE,-18.2038303798192,15.8521401477439,"3"
export_early_B3_B03_CD8 _2020-06-16,5416.36,312.476,892.469,5598.49,1689.69,24.8058,13.4955,578.012,511.296,3106.73,691.354,FALSE,18.2850623198038,-20.8421506638852,"1"
export_early_B3_B03_CD8 _2020-06-16,336.022,160.413,245.973,1566.35,1511.35,155.176,12.4658,4024.11,126.41,892.298,-74.989,FALSE,-5.03674601803566,6.41670944339604,"4"
export_early_B3_B03_CD8 _2020-06-16,2868.83,109.944,55.961,4200.23,2624.85,238.505,-30.1754,122.631,-23.5588,2099.26,1888.27,FALSE,5.40560832570245,-24.0043227651722,"6"
export_early_B3_B03_CD8 _2020-06-16,533.79,83.345,118.807,1115.25,456.79,238.254,-151.023,784.64,99.1081,5750.67,-49.1897,FALSE,-4.55494199900396,-4.59152659257794,"15"
export_early_B3_B03_CD8 _2020-06-16,-108.938,138.267,258.206,368.403,724.143,274.872,25.3099,6829.08,13.7179,7224.61,297.805,FALSE,13.4882099932167,9.8893325697662,"15"
export_early_B3_B03_CD8 _2020-06-16,1895.96,67.192,945.302,-741.98,-95.1019,-10.4846,-937.434,6339.6,-1040.96,79046.8,-2289.36,TRUE,28.9576873626842,-5.03523960541812,"23"
export_early_B3_B03_CD8 _2020-06-16,-63.675,41.1045,-120,39.8036,155.124,220.224,23.7403,-139.307,2252.46,-77.2939,135.485,FALSE,-43.9520531762888,11.9447961985161,"5"
export_early_B3_B03_CD8 _2020-06-16,4059.14,135.814,177.724,3243.6,2124.57,208.961,269.721,730.362,579.386,96.7777,-197.778,FALSE,10.6663269197805,-24.8611356950512,"9"
export_early_B3_B03_CD8 _2020-06-16,5772.34,388.007,166.955,6495.52,1703.37,268.587,-27.7125,885.771,3660.65,172.142,192.548,FALSE,25.0262903019333,-19.5442468684484,"1"
export_early_B3_B03_CD8 _2020-06-16,181.702,415.996,283.595,627.389,325.045,1094.33,-90.8988,24531.4,3654.23,46.3344,128.856,TRUE,31.7100881545444,32.7039201775287,"28"
export_early_B3_B03_CD8 _2020-06-16,205.856,41.3244,16.6961,316.512,475.884,898.41,75.5838,8937.95,1684.46,122.747,1605.23,FALSE,11.0914970320333,27.8645014663705,"28"
export_early_B3_B03_CD8 _2020-06-16,9371.79,168.798,183.043,4913.33,1557.08,10.6497,78.592,23.5182,185.819,828.196,731.064,TRUE,40.1311908912925,-13.4907267787456,"1"
export_early_B3_B03_CD8 _2020-06-16,-315.521,112.734,-223.219,116.751,541.138,171.963,-35.1582,156.822,6093.82,205.609,3036.41,FALSE,-6.69567521872097,43.6717050416312,"27"
export_early_B3_B03_CD8 _2020-06-16,5034.02,182.186,218.321,100.698,414.17,205.647,42.8327,11145.3,262.143,259.423,3399.46,FALSE,34.5528520296314,9.29849961596652,"29"
export_early_B3_B03_CD8 _2020-06-16,3838.37,75.1785,5.79615,102.438,41.9417,43.6759,-10.2724,3630.59,3775.55,-51.1697,1665.76,TRUE,28.0891738918536,2.43181674588429,"9"
export_early_B3_B03_CD8 _2020-06-16,42.8736,61.0349,221.843,27.8076,523.769,918.841,64.6853,-14.2957,709.969,242.264,34.4418,FALSE,-31.5646267686893,10.603063155326,"5"
export_early_B3_B03_CD8 _2020-06-16,9422.01,131.292,370.025,3827.35,2015.36,-106.82,-1.79083,492.027,237.42,1463.57,133.108,FALSE,42.9519984648796,-15.0669752957342,"1"
export_early_B3_B03_CD8 _2020-06-16,259.409,600.664,832.028,224.524,198.03,299.404,-41.0938,12485,780.233,29.4465,349.975,FALSE,23.5857735889173,28.1063612892674,"10"
export_early_B3_B03_CD8 _2020-06-16,890.394,139.473,273.123,291.906,107.178,148.663,-8.79522,528.259,108.246,1670.99,578.61,FALSE,-17.9579255695806,4.37015860871229,"17"
export_early_B3_B03_CD8 _2020-06-16,3957.67,48.6864,134.705,2081.02,905.259,208.315,-20.0637,222.951,22.5648,2164.87,1373.42,FALSE,9.17979952810603,-12.6494555001748,"6"
export_early_B3_B03_CD8 _2020-06-16,7028.45,158.032,-89.8899,59.9108,301.123,203.133,-145.967,18050,6754.63,-16.8733,506.614,FALSE,40.4015234218042,13.5851396456873,"24"
export_early_B3_B03_CD8 _2020-06-16,-92.4207,76.6607,94.5129,210.418,693.384,1275.02,-32.8934,11465.4,4001.71,108.424,2503.49,FALSE,16.1144383129054,37.1175868369756,"8"
export_early_B3_B03_CD8 _2020-06-16,381.655,113.709,-392.734,279.045,707.871,846.826,-98.8414,18598.9,10266.4,-139.753,2996.63,FALSE,23.8915696176693,40.3176448497478,"28"
export_early_B3_B03_CD8 _2020-06-16,1058.55,102.832,-6.17633,227.593,295.643,223.417,26.6441,2891.68,4794.02,1717.83,18415,TRUE,-3.34946477677995,59.0594818877,"20"
export_early_B3_B03_CD8 _2020-06-16,2411.54,14.6505,518.807,13.4503,2536.87,769.997,-99.1939,144.935,71.8003,1888.55,1753.73,FALSE,-3.7866942294888,-16.6875206157822,"16"
export_early_B3_B03_CD8 _2020-06-16,836.588,55.3859,16.8846,-23.1668,239.612,446.063,11.0459,4755.36,2672.99,333.723,11161.6,FALSE,-6.50703760915552,47.4649282358808,"25"
export_early_B3_B03_CD8 _2020-06-16,221.538,196.792,252.871,273.893,400.786,343.326,-56.6712,6374.01,38.6255,5260.23,1081.87,FALSE,9.6326713159051,12.9868644839825,"15"
export_early_B3_B03_CD8 _2020-06-16,-408.874,258.175,485.915,-290.523,3191.41,1042.95,-1273.16,12465.1,136.539,122856,11.7596,FALSE,26.8860129596402,-4.56859139721438,"23"
export_early_B3_B03_CD8 _2020-06-16,714.321,70.8055,178.21,113.339,731.915,132.257,-9.54378,7308.89,169.667,1937.34,1356.66,FALSE,9.04807279562805,20.2096722939565,"2"
export_early_B3_B03_CD8 _2020-06-16,170.329,1411.15,283.803,952.017,39.272,3766.49,111.231,44084.7,1544.96,18.2758,2022.8,FALSE,37.5267071898927,30.4245871614169,"19"
export_early_B3_B03_CD8 _2020-06-16,4290.79,192.956,153.34,2220.56,1229.87,63.4664,-13.2929,-111.584,101.321,959.978,70.5714,FALSE,11.8708293917776,-18.9753353787849,"6"
export_early_B3_B03_CD8 _2020-06-16,228.012,501.888,877.432,1380.61,1162.44,692.618,38.4906,23910,20.9632,892.639,622.11,FALSE,33.3572109899634,32.2893344566024,"19"
export_early_B3_B03_CD8 _2020-06-16,4325.68,151.494,374.76,3039.11,1612.5,30.5186,-54.9437,-91.4758,264.85,1008.31,428.568,FALSE,12.991048530251,-20.9542447342654,"6"
export_early_B3_B03_CD8 _2020-06-16,643.684,192.218,288.297,368.423,184.029,250.725,109.017,10640.8,1339.3,263.054,364.148,FALSE,18.17109117062,27.6087701230611,"10"
export_early_B3_B03_CD8 _2020-06-16,-352.063,88.5851,154.657,54.1974,656.048,271.934,-176.369,7528.23,4828.65,1383.89,11563.3,FALSE,0.00769580183394503,50.1870581251454,"25"
export_early_B3_B03_CD8 _2020-06-16,5150.01,179.914,106.592,2488.25,1254.05,-65.9025,-69.2356,267.471,118.84,2800.57,-220.918,FALSE,19.9936710264061,-18.4055805845254,"1"
export_early_B3_B03_CD8 _2020-06-16,2924.09,155.141,97.8856,4093.77,1702.57,163.158,-73.3086,420.194,171.993,3422.83,201.192,TRUE,2.696956748393,-15.7728056219756,"6"
export_early_B3_B03_CD8 _2020-06-16,421.771,210.193,300.125,101.761,25.403,194.793,2.90168,4235.43,-43.0257,5596.7,-42.5651,FALSE,2.05469140150217,3.24521634824488,"15"
export_early_B3_B03_CD8 _2020-06-16,373.862,223.069,269.243,49.2195,634.551,332.914,-0.321712,16860.6,75.1457,426.572,1243.57,FALSE,29.0817105476474,30.5172818017825,"19"
export_early_B3_B03_CD8 _2020-06-16,358.205,122.518,205.431,649.289,86.8488,311.397,-40.6004,4132.77,47.7681,1093.15,899.622,TRUE,-13.7469235355885,25.07000125049,"2"
export_early_B3_B03_CD8 _2020-06-16,364.913,81.9745,170.618,1614.47,1088.25,131.989,87.6207,1826.14,70.1458,3179.7,20.9416,TRUE,-19.612193039522,2.44975526120872,"14"
export_early_B3_B03_CD8 _2020-06-16,4876.55,112.601,-0.407906,3553.36,1454.45,37.7576,38.5525,449.946,1132.18,249.439,122.483,FALSE,18.2070126636938,-21.3636606034536,"1"
export_early_B3_B03_CD8 _2020-06-16,259.74,253.665,210.452,352.339,882.301,1412.26,-68.6888,12346.2,611.23,449.582,396.271,FALSE,23.2936276036165,23.5842222766247,"8"
export_early_B3_B03_CD8 _2020-06-16,4541.63,84.4855,89.4655,1996.66,2180.66,32.1921,16.3066,-98.1345,109.876,1819.86,1681.98,FALSE,16.272967300977,-18.7795827941646,"1"
export_early_B3_B03_CD8 _2020-06-16,1497.97,150.2,389.063,130.518,972.289,1525.71,-80.7668,21791.6,3838.3,180.097,162.07,FALSE,32.2017780234119,35.7484753027216,"28"
export_early_B3_B03_CD8 _2020-06-16,849.195,160.071,210.411,240.761,-5.92347,151.201,81.7388,20356.4,1824.52,131.241,10.7353,FALSE,29.9859538055222,33.4471106510815,"19"
export_early_B3_B03_CD8 _2020-06-16,891.969,208.528,594.259,276.482,688.213,275.899,67.0407,18792.7,1372.39,137.884,117.999,TRUE,26.4490468546268,30.9616116364384,"19"
export_early_B3_B03_CD8 _2020-06-16,1848.71,111.865,212.063,410.916,937.113,335.201,167.23,14332.8,1241.09,200.229,226.76,FALSE,30.4476711246998,23.3467449046622,"29"
export_early_B3_B03_CD8 _2020-06-16,75.1708,96.6448,166.766,131.359,275.043,399.968,-0.70838,6933.94,1311.1,171.637,2425.67,TRUE,-3.78671428703537,34.2345461927704,"25"
export_early_B3_B03_CD8 _2020-06-16,5401.4,151.023,268.997,2169.13,1543.93,-51.5766,-94.1161,464.499,7.29148,3685.83,3059.64,FALSE,20.9174134393695,-16.4936597634203,"1"
export_early_B3_B03_CD8 _2020-06-16,913.222,433.294,1511.42,6006.24,3338.17,314.632,-9.25691,1271.05,581.231,3899.99,989.732,TRUE,-9.95860450604877,-9.05497647195952,"6"
export_early_B3_B03_CD8 _2020-06-16,28.7447,77.3998,138.682,115.227,1161.65,338.909,187.983,-103.492,1643.09,-214.573,90.7511,TRUE,-46.0762570171146,9.42465458206662,"5"
export_early_B3_B03_CD8 _2020-06-16,3366.06,46.3719,320.465,2122.79,1520.66,37.3992,263.659,743.552,75.6732,991.085,263.455,FALSE,4.28891809615415,-16.8646583506788,"9"
export_early_B3_B03_CD8 _2020-06-16,430.6,125.712,259.736,707.892,1208.72,182.379,4.11534,933.768,-109.434,1966.24,27.4526,FALSE,-17.642970929494,-6.51179910889084,"14"
export_early_B3_B03_CD8 _2020-06-16,-206.043,93.1091,66.0309,106.487,154.885,162.439,113.976,173.555,1003.63,57.6618,1099.62,FALSE,-36.0849812288649,20.5596520117882,"5"
export_early_B3_B03_CD8 _2020-06-16,5408.68,157.075,249.923,3984.41,1244.66,36.8985,-8.16643,337.785,90.0421,1407.86,66.4329,FALSE,20.3704157014716,-20.1015920041826,"1"
export_early_B3_B03_CD8 _2020-06-16,228.787,69.4504,70.8015,-20.6812,484.046,576.858,-23.9172,617.831,1285.54,-103.759,2143.77,FALSE,-25.1703047959798,30.8851483759511,"3"
export_early_B3_B03_CD8 _2020-06-16,230.765,47.314,179.857,932.154,436.819,271.825,-19.9157,567.204,118.491,2826.18,-4.9521,FALSE,-19.98314801944,-4.45285975370896,"14"
export_early_B3_B03_CD8 _2020-06-16,-178.758,420.126,449.311,433.046,2481.02,1730.53,-76.2862,3998.5,184.733,1080.8,222.127,FALSE,5.0303429516579,13.0101044282599,"3"
export_early_B3_B03_CD8 _2020-06-16,-73.2369,161.506,156.113,130.904,529.143,393.96,0.530761,6953.39,247.436,74.2547,4472.19,FALSE,-3.14291871372324,35.0714946616685,"25"
export_early_B3_B03_CD8 _2020-06-16,3767.69,44.0126,-56.2161,93.1607,522.079,666.833,-337.357,12529.9,4409.43,120.859,2030.12,FALSE,30.5902403070538,21.68262785767,"24"
export_early_B3_B03_CD8 _2020-06-16,307.688,15.5112,199.73,368.883,1904.61,440.291,-654.857,-168.369,109.013,31113.2,-752.782,TRUE,24.5407156823777,-4.25846097212506,"15"
export_early_B3_B03_CD8 _2020-06-16,622.821,148.456,391.989,1025.88,543.77,403.361,-74.3376,4264.48,145.901,1725.88,277.222,FALSE,-8.1120887696777,14.15632869592,"2"
export_early_B3_B03_CD8 _2020-06-16,342.657,93.8134,535.29,203.702,-129.664,68.8327,37.4308,330.79,-29.0889,2023.31,71.1801,FALSE,-18.8200686964772,1.98708608747658,"17"
export_early_B3_B03_CD8 _2020-06-16,20.7479,111.464,135.26,34.5765,511.118,187.03,-22.7044,685.341,371.664,414.732,3955.1,FALSE,-20.7565475860197,43.2706698148546,"22"
export_early_B3_B03_CD8 _2020-06-16,2207.41,112.035,-379.131,122.529,350.785,68.9536,-107.795,22342.3,9704.08,9.95051,2267.39,FALSE,21.1183130234566,44.1968734728136,"28"
export_early_B3_B03_CD8 _2020-06-16,339.301,143.251,223.732,194.215,-52.7792,645.809,-14.7797,6514.48,80.2394,113.224,1125.08,FALSE,3.73111822162317,23.3161732213076,"2"
export_early_B3_B03_CD8 _2020-06-16,-67.0845,386.789,272.867,793.405,1895.61,227.335,-41.6077,26416,1804.67,510.989,94.7121,FALSE,36.442352311103,34.2900091562544,"19"
export_early_B3_B03_CD8 _2020-06-16,276.996,287.733,736.181,2497.83,677.96,147.321,-2.65912,927.424,88.1982,2564.71,429.208,FALSE,-17.9098401406446,-6.67270767316195,"6"
export_early_B3_B03_CD8 _2020-06-16,366.755,27.6411,120.816,892.465,1186.61,115.45,130.358,3.71388,-17.5451,1945.87,255.891,FALSE,-21.7048537484667,-8.28888146493809,"14"
export_early_B3_B03_CD8 _2020-06-16,374.195,581.309,323.836,237.81,465.631,1190.72,32.5381,19364.2,1129.52,19.2178,295.988,FALSE,32.256103334263,31.1758274761084,"19"
export_early_B3_B03_CD8 _2020-06-16,3304.85,98.5298,70.7862,4019.68,1603.09,105.58,8.65687,371.686,-46.7741,7336.7,12.2799,TRUE,14.4732597775403,-8.35547827926274,"15"
export_early_B3_B03_CD8 _2020-06-16,4508.14,38.988,180.329,6774.69,1732.03,98.0685,-152.401,-173.782,615.024,764.718,29.3348,FALSE,12.4943062585015,-25.5819387366077,"6"
export_early_B3_B03_CD8 _2020-06-16,1259.53,204.126,285.389,141.433,200.587,243.848,-31.8343,6131.64,65.6276,5615.56,226.707,TRUE,15.2076711849268,5.34612747867466,"15"
export_JLL PEPT_B3_B03_CD8 _2020-06-16,6921.93,536.489,322.284,1383.41,193.677,821.815,161.601,7239.14,5197.51,-43.0057,355.313,FALSE,37.8035264959982,6.25059416523677,"24"
export_JLL PEPT_B3_B03_CD8 _2020-06-16,95.8675,142.679,351.916,723.526,1571.17,1208.69,36.2686,9491.33,377.386,187.601,1085.87,TRUE,8.57882823794952,28.6565450511481,"8"
export_JLL PEPT_B3_B03_CD8 _2020-06-16,4063.35,222.594,270.589,674.207,1990.89,371.031,52.114,9562.94,644.832,26.8659,48.7432,TRUE,33.1178108506203,11.598679121682,"4"
export_JLL PEPT_B3_B03_CD8 _2020-06-16,8945.02,226.768,154.295,1577.95,1086.61,58.4649,-47.1045,100.196,64.57,1135.42,-150.912,TRUE,38.4415409410853,-15.3032208458328,"1"
export_JLL PEPT_B3_B03_CD8 _2020-06-16,124.956,329.056,734.313,577.641,1024.92,119.742,-88.1791,31394,1196.78,243.258,91.9026,FALSE,37.2074579227473,33.9207822668842,"19"
export_JLL PEPT_B3_B03_CD8 _2020-06-16,10912.1,192.167,361.746,986.329,1604.04,1742.13,76.9587,583.819,50.4325,940.612,654.437,FALSE,38.239898794188,-3.04450525112201,"11"
export_JLL PEPT_B3_B03_CD8 _2020-06-16,171.127,192.447,671.13,357.459,503.367,131.52,11.0926,7727.49,363.073,1642.77,417.937,TRUE,8.36304085222407,20.6867300399606,"2"
export_JLL PEPT_B3_B03_CD8 _2020-06-16,9338.37,200.205,225.489,1322.97,1662.3,5.45438,260.882,195.247,196.699,877.948,813.856,FALSE,40.5254325663391,-11.3562490889285,"1"
export_JLL PEPT_B3_B03_CD8 _2020-06-16,4712.99,56.8449,173.872,1026.8,1363.86,7.7615,52.3615,506.09,782.155,98.7327,124.732,FALSE,17.8585666947083,-18.1874384554171,"1"
export_JLL PEPT_B3_B03_CD8 _2020-06-16,348.26,91.5185,151.877,154.488,388.645,519.833,74.2849,4352.44,187.342,-18.4952,819.79,FALSE,-8.9839791937013,20.5365638163351,"2"
export_JLL PEPT_B3_B03_CD8 _2020-06-16,4000.89,123.297,210.65,48.9518,1226.11,-150.863,425.869,8527.52,192.464,33261,429.482,TRUE,24.7088880392492,-5.62557775476912,"15"
export_JLL PEPT_B3_B03_CD8 _2020-06-16,67.8621,47.9874,221.739,166.897,881.537,459.522,0.10537,6086.43,631.967,189.891,171.909,TRUE,2.53293537223171,21.0757041493699,"8"
export_JLL PEPT_B3_B03_CD8 _2020-06-16,36.1111,163.751,533.606,282.426,-13.8583,174.731,54.0328,3399.14,969.453,103.108,180.387,TRUE,-22.0730529390234,14.2671185815421,"5"
export_JLL PEPT_B3_B03_CD8 _2020-06-16,6064.23,142.901,282.125,3444.73,1934.7,10.8299,-59.6793,352.11,211.351,1143.54,-7.36968,FALSE,27.4320885029835,-21.1585209321167,"1"
export_JLL PEPT_B3_B03_CD8 _2020-06-16,77.0366,32.5172,57.2664,133.549,934.958,96.6635,153.885,4949.79,4049.06,99.4704,82.2267,FALSE,1.30463304836875,31.3015622617523,"28"
export_JLL PEPT_B3_B03_CD8 _2020-06-16,1516.68,224.764,249.311,158.604,141.821,74.5303,-37.0242,1874.06,751.859,276.988,48.7107,FALSE,-13.2528433621563,8.21275744070793,"5"
export_JLL PEPT_B3_B03_CD8 _2020-06-16,320.818,132.533,107.498,90.7917,349.644,152.507,47.3811,850.776,2159,16.5766,-125.422,FALSE,-40.672953846817,9.95802473165219,"5"
export_JLL PEPT_B3_B03_CD8 _2020-06-16,10505.8,162.591,407.806,118.117,65.8817,132.025,242.565,46466.6,3084.17,243.959,292.436,FALSE,43.4740676072212,15.8849594946309,"21"
export_JLL PEPT_B3_B03_CD8 _2020-06-16,53.9211,206.5,332.401,168.876,150.148,70.2674,-59.2814,22261.7,1278.8,138.989,95.0231,TRUE,29.9682360368866,32.0980235886071,"19"
export_JLL PEPT_B3_B03_CD8 _2020-06-16,1064.61,29.5271,242.066,66.876,240.864,201.676,346.457,15025.2,1310.13,99.6057,200.211,FALSE,24.1211549167831,29.1362317485249,"19"
export_JLL PEPT_B3_B03_CD8 _2020-06-16,4726.15,250.548,234.044,212.019,619.771,326.595,11.4699,11088,594.419,209.11,74.2157,TRUE,34.2271339777994,12.1793523433287,"29"
export_JLL PEPT_B3_B03_CD8 _2020-06-16,595.446,163.338,558.72,1214.81,1565.32,272.249,88.0535,9308.09,106.883,1117.2,831.915,FALSE,16.3428782569595,22.3251103799902,"8"
export_JLL PEPT_B3_B03_CD8 _2020-06-16,764.419,223.375,661.495,779.858,751.37,34.0766,-55.8261,3862.42,246.439,13525.5,117.06,TRUE,17.5936369811566,-1.18273034919994,"15"
export_JLL PEPT_B3_B03_CD8 _2020-06-16,1872.44,172.543,111.261,3043.12,814.081,80.9934,-9.2428,-756.503,2655.69,5.09258,264.198,TRUE,-11.0723476735193,-14.5895756718092,"9"
export_JLL PEPT_B3_B03_CD8 _2020-06-16,391.426,387.604,1580.23,885.842,1312.7,130.927,-100.885,14129.8,518.982,4342.19,614.807,TRUE,20.4666269401885,22.8222461811707,"29"
export_JLL PEPT_B3_B03_CD8 _2020-06-16,1089.12,301.015,275.213,945.162,78.9977,56.5805,204.971,8771.44,1053.1,139.123,248.283,FALSE,15.4408904584812,21.3362663575379,"10"
export_JLL PEPT_B3_B03_CD8 _2020-06-16,317.499,92.0723,253.916,114.287,398.922,92.4749,-53.5584,4797.05,64.4129,1541.49,-81.3791,FALSE,-3.0452195288125,12.8625374719892,"2"
export_JLL PEPT_B3_B03_CD8 _2020-06-16,7.91531,116.501,195.85,130.579,147.948,-40.0888,97.9617,5986.17,1040.46,-61.0004,95.3056,FALSE,3.52031399226246,17.9966970453912,"10"
export_JLL PEPT_B3_B03_CD8 _2020-06-16,-32.6578,170.59,672.596,377.639,423.141,96.9488,-22.1926,1924.92,156.672,2010.93,479.95,TRUE,-21.3865661272888,3.16499937866732,"17"
export_JLL PEPT_B3_B03_CD8 _2020-06-16,16227,275.62,1079.85,2552.75,2622.62,121.66,120.93,906.154,182.142,3753.68,1190.86,FALSE,47.4676653770732,-5.48630347903425,"1"
export_JLL PEPT_B3_B03_CD8 _2020-06-16,1674.96,1193.16,1899.34,2330.57,2435.38,1429.71,383.877,1505,1303.28,12235.1,6130.07,FALSE,-4.53169813533311,25.0598391171538,"22"
export_JLL PEPT_B3_B03_CD8 _2020-06-16,-234.567,144.027,223.601,399.102,1469.61,137.823,30.7194,1635.6,4.79933,1135.85,275.543,FALSE,-17.6869253521694,-3.44127434481612,"14"
export_JLL PEPT_B3_B03_CD8 _2020-06-16,8648.99,96.8499,113.907,1361.17,1143.6,-7.12764,-19.4527,480.54,818.802,34.5242,40.1189,FALSE,39.9619076211554,-13.0787043562714,"1"
export_JLL PEPT_B3_B03_CD8 _2020-06-16,636.071,31.0303,268.399,197.304,78.4452,191.793,59.7896,3663.68,73.2197,1546.65,-120.005,TRUE,-16.1848127955902,13.8746823341383,"2"
export_JLL PEPT_B3_B03_CD8 _2020-06-16,7782.15,194.253,227.67,1405.05,1276.75,1.37037,73.9194,508.823,-86.813,1014.81,-100.359,FALSE,37.1855021017174,-14.8609282846438,"1"
export_JLL PEPT_B3_B03_CD8 _2020-06-16,209.153,216.28,380.706,101.214,685.59,844.016,1.136,10187.7,565.969,167.843,304.276,TRUE,12.6333444209623,24.1861949591004,"8"
export_JLL PEPT_B3_B03_CD8 _2020-06-16,145.036,80.6457,171.338,347.969,390.176,156.558,-24.4868,3744.5,2470.02,-10.3295,211.468,FALSE,-10.8412791192198,23.1221620279031,"28"
export_JLL PEPT_B3_B03_CD8 _2020-06-16,62.5542,88.613,227.183,119.721,991.932,1214.13,68.2654,3064.16,610.841,295.957,230.908,TRUE,-23.942563723881,20.4768104176143,"3"
export_JLL PEPT_B3_B03_CD8 _2020-06-16,108.359,306.541,414.256,350.869,562.548,4.01784,56.0939,-279.165,203.984,11675.7,13837.3,FALSE,-15.5845859093619,58.9339043160358,"22"
export_JLL PEPT_B3_B03_CD8 _2020-06-16,1386.62,92.402,246.473,109.968,1154.92,129.568,-1.58893,6135.77,1177.51,72.6754,41.8268,FALSE,12.7637268112549,16.1928127944423,"10"
export_JLL PEPT_B3_B03_CD8 _2020-06-16,-15.9237,89.1432,181.43,117.189,150.723,100.659,-62.5525,4781.36,1722.76,5.09392,404.371,TRUE,-10.826943020351,19.253619489499,"28"
export_JLL PEPT_B3_B03_CD8 _2020-06-16,-74.0338,105.178,146.859,129.439,4.59627,29.1909,77.4627,6501.25,7.69024,914.358,144.493,FALSE,7.95993982447704,15.9940705737356,"2"
export_JLL PEPT_B3_B03_CD8 _2020-06-16,21344.6,164.802,-2141.22,192.503,271.183,113.312,1159.91,12847.6,51984.5,-543.834,100.128,TRUE,14.4474729148279,49.6035491203425,"28"
export_JLL PEPT_B3_B03_CD8 _2020-06-16,35.0544,140.805,744.393,124.675,1281.48,1382.99,37.2119,14721.1,1222.23,-104.216,529.088,TRUE,23.026689224617,25.7311574372671,"8"
export_JLL PEPT_B3_B03_CD8 _2020-06-16,418.023,52.8201,246.021,1705.81,1727.91,211.923,15.3772,7006.18,2867.69,536.122,-177.881,FALSE,4.25294696790445,24.5879584216284,"28"
export_JLL PEPT_B3_B03_CD8 _2020-06-16,11754.4,272.139,412.985,1454.62,1776.93,32.8579,91.5537,3.19493,300.918,997.886,658.37,FALSE,44.69150194364,-9.44909359368721,"1"
export_JLL PEPT_B3_B03_CD8 _2020-06-16,166.227,221.017,702.474,238.087,1092.52,383.091,145.325,1769.98,158.602,2015.74,435.405,FALSE,-20.5193317381093,1.81233620715261,"4"
export_JLL PEPT_B3_B03_CD8 _2020-06-16,11836.9,56.0295,-1988.27,55.9886,74.1083,-34.3952,222.361,21521.7,41722.5,-117.025,2343.33,TRUE,14.3909058140183,49.4722284088782,"28"
export_JLL PEPT_B3_B03_CD8 _2020-06-16,872.037,249.127,279.018,438.398,869.363,851.682,27.5017,5015.77,12.8982,886.473,4.62073,FALSE,0.781444028999505,16.9366820950927,"3"
export_JLL PEPT_B3_B03_CD8 _2020-06-16,10817.2,87.4696,229.306,1797.85,2160.4,-19.015,44.7639,-22.0594,-36.2263,4901.83,-79.5036,FALSE,42.3976895598363,-14.4961899471315,"1"
export_JLL PEPT_B3_B03_CD8 _2020-06-16,595.742,94.495,152.746,198.075,1635.56,106.563,18.0426,9336.91,561.959,-75.015,29.6528,FALSE,17.1254837363754,21.7745344707373,"8"
export_JLL PEPT_B3_B03_CD8 _2020-06-16,362.643,409.438,742.425,1023.15,678.115,327.371,109.785,229.358,1811.35,-19.2373,308.536,TRUE,-46.3858961202171,3.98950561756267,"7"
export_JLL PEPT_B3_B03_CD8 _2020-06-16,-2.69573,701.66,946.662,2856.84,283.508,383.546,132.216,662.148,676.511,615.658,421.943,TRUE,-48.3320765259093,2.40666090911778,"7"
export_JLL PEPT_B3_B03_CD8 _2020-06-16,1575.49,159.14,260.815,1562.94,1560.64,16.1962,101.752,-39.3445,683.705,102.617,267.261,FALSE,-10.4766020188274,-18.2107957587326,"9"
export_JLL PEPT_B3_B03_CD8 _2020-06-16,3066.68,123.031,478.879,198.655,30.4706,32.4324,-33.1759,1865.12,899.545,245.706,-4.65155,FALSE,13.6056257459445,0.15007775169974,"9"
export_JLL PEPT_B3_B03_CD8 _2020-06-16,9869.11,128.784,586.908,239.368,94.3228,159.049,41.8779,26414.1,1107.1,143.953,189.412,TRUE,42.2006502820444,10.187892349251,"21"
export_JLL PEPT_B3_B03_CD8 _2020-06-16,6858.48,172.49,242.467,168.041,307.282,107.4,262.941,3284.76,1604.61,274.927,-21.3539,FALSE,36.8251948828174,-3.75805051270095,"9"
export_JLL PEPT_B3_B03_CD8 _2020-06-16,9913.66,161.266,385.315,24.0481,243.344,37.9795,298.426,29675.4,1075.67,145.2,388.293,FALSE,43.6696360117669,13.9003435648059,"21"
export_JLL PEPT_B3_B03_CD8 _2020-06-16,-10.177,175.437,364.152,507.787,540.514,215.793,94.4798,13195.5,712.475,6.61445,150.956,FALSE,23.365293796047,28.4941115435619,"8"
export_JLL PEPT_B3_B03_CD8 _2020-06-16,6030.95,143.533,449.144,822.438,1217.25,125.552,-57.1358,487.841,209.834,1004.14,328.072,FALSE,27.7984051284758,-16.5669557265753,"1"
export_JLL PEPT_B3_B03_CD8 _2020-06-16,301.056,111.517,261.659,92.1917,410.152,554.991,87.3157,9480.58,461.79,570.235,1876.47,FALSE,13.8154523086995,28.4304112372812,"28"
export_JLL PEPT_B3_B03_CD8 _2020-06-16,353.908,138.863,327.294,1157.79,1125.8,155.475,27.326,1683.6,712.062,256.887,-254.349,TRUE,-20.4433823644092,7.7761164526866,"5"
export_JLL PEPT_B3_B03_CD8 _2020-06-16,7929.19,164.256,163.353,1121.48,1038.49,55.3949,28.2886,557.843,665.913,319.494,-117.729,FALSE,37.4387126743407,-13.8604487380009,"1"
export_JLL PEPT_B3_B03_CD8 _2020-06-16,402.894,176.603,89.5051,126.038,467.01,237.952,-30.5718,8196.25,2444.99,104.463,-99.2752,FALSE,11.7219025646827,27.8015437496519,"10"
export_JLL PEPT_B3_B03_CD8 _2020-06-16,11950.3,502.474,408.138,8072.02,2698.7,6.62273,40.3218,714.078,2669.17,377.213,368.787,FALSE,48.19020480555,-13.2981800450528,"1"
export_JLL PEPT_B3_B03_CD8 _2020-06-16,246.44,217.167,268.669,264.327,156.071,558.302,71.2678,9703.64,1749.18,256.649,128.117,FALSE,16.8087386340297,25.8476339568302,"8"
export_JLL PEPT_B3_B03_CD8 _2020-06-16,174.158,62.1235,50.8382,341.516,867.102,445.55,73.9945,3835.36,999.237,17.3319,105.384,FALSE,-12.9982489364065,16.7013522103477,"3"
export_JLL PEPT_B3_B03_CD8 _2020-06-16,94.8027,261.675,894.152,1257.81,2215.53,322.258,100.334,1298.41,16.4534,1560.88,611.27,TRUE,-27.1634759684544,-9.34072943895695,"14"
export_JLL PEPT_B3_B03_CD8 _2020-06-16,7513.6,1082.43,329.682,3660.65,992.031,124.458,46.0925,-910.455,1704.61,-8.92429,220.199,FALSE,36.4228994512403,-18.7375626534153,"1"
export_JLL PEPT_B3_B03_CD8 _2020-06-16,965.693,208.657,206.18,436.854,-169.342,228.504,305.118,6096.77,1074.41,311.382,86.8625,TRUE,-3.62671799317349,22.815221922236,"10"
export_JLL PEPT_B3_B03_CD8 _2020-06-16,246.437,42.1679,113.351,123.689,871.64,220.413,28.5335,-478.212,632.13,106.868,200.458,TRUE,-40.5899378156325,3.03811063280367,"5"
export_JLL PEPT_B3_B03_CD8 _2020-06-16,7297.91,242.216,136.195,288.546,671.14,32.4195,87.2585,5296.89,2690.45,280.724,500.597,FALSE,38.4257900204359,0.564476546317727,"9"
export_JLL PEPT_B3_B03_CD8 _2020-06-16,8858.32,118.003,311.205,2300.19,1850.83,200.711,69.1063,-590.844,2138.57,-52.1692,244.108,FALSE,40.2980289550043,-13.7818550803637,"1"
export_JLL PEPT_B3_B03_CD8 _2020-06-16,1438.97,138.058,451.26,370.436,145.008,160.44,-48.8513,60362.9,2319.58,-100.502,515.463,FALSE,37.8213330541227,33.6888628984012,"19"
export_JLL PEPT_B3_B03_CD8 _2020-06-16,437.615,367.951,1013.27,1155.54,2144.84,89.8652,-9.0415,1389.08,235.484,3943.33,366.421,TRUE,-13.202307456284,-4.43114237720364,"15"
export_JLL PEPT_B3_B03_CD8 _2020-06-16,332.384,306.056,1105.64,791.333,649.599,163.461,90.5345,9722.04,319.729,2103.99,632.531,FALSE,16.5192152047479,21.2122696350436,"29"
export_JLL PEPT_B3_B03_CD8 _2020-06-16,649.401,75.1819,217.994,339.703,-5.62613,121.656,40.2391,2010.49,46.7951,1164.79,86.4363,FALSE,-18.8125304318721,8.16298490175623,"17"
export_JLL PEPT_B3_B03_CD8 _2020-06-16,3215.49,96.3526,-1053.09,213.593,133.131,18.971,386.492,7007.2,27557.5,-388.838,20.7659,FALSE,4.66317565676836,51.7216960381772,"28"
export_JLL PEPT_B3_B03_CD8 _2020-06-16,676.117,155.476,321.564,168.233,388.152,14.1741,217.476,991.246,-26.2893,92.7752,3124.31,FALSE,-16.7081844770373,36.3463646388823,"17"
export_JLL PEPT_B3_B03_CD8 _2020-06-16,-655.294,853.144,237300,189531,41800.8,-116.35,-2631.53,-12629.5,16094.4,-15485.5,-148.091,TRUE,-5.63215918708791,-59.3100304770554,"11"
export_JLL PEPT_B3_B03_CD8 _2020-06-16,597.216,182.953,214.581,282.048,144.454,212.579,204.959,7028.37,601.397,92.5597,983.335,FALSE,10.1601140071497,22.9803930411253,"10"
export_JLL PEPT_B3_B03_CD8 _2020-06-16,1185.03,221.133,-349.063,291.147,78.2881,38.9062,156.66,16367.5,17989.9,444.365,24.7432,TRUE,14.2900593315969,45.9472870222428,"28"
export_JLL PEPT_B3_B03_CD8 _2020-06-16,12105.1,127.461,307.823,113.679,73.0947,151.905,447.951,15003.8,1203.9,211.715,13.4435,TRUE,41.8599308260001,7.31545526941391,"21"
export_JLL PEPT_B3_B03_CD8 _2020-06-16,4332.33,147.595,203.918,229.491,494.939,748.835,54.2327,40267.5,3724.76,6.81666,137.661,FALSE,30.4049575399118,30.3592114318105,"19"
export_JLL PEPT_B3_B03_CD8 _2020-06-16,491.214,724.26,1342.71,2952.7,334.954,470.361,424.088,802.834,955.568,324.279,111.734,FALSE,-53.923741590774,2.61556315521635,"7"
export_JLL PEPT_B3_B03_CD8 _2020-06-16,285.79,295.792,276.109,605.854,706.371,187.964,-26.5385,553.298,1873.91,244.13,157.606,TRUE,-42.544451742611,11.8221651416206,"5"
export_JLL PEPT_B3_B03_CD8 _2020-06-16,2127.98,39.1461,176.98,1794.38,1338.45,76.4574,-14.2871,24.5383,1468.33,291.834,49.087,FALSE,-6.91215363902659,-17.031953674702,"9"
export_JLL PEPT_B3_B03_CD8 _2020-06-16,26.4456,159.745,183.013,690.796,240.045,38.6907,173.251,163.63,61.8076,5231.49,180.139,FALSE,-11.7643034087022,-3.05092710812411,"15"
export_JLL PEPT_B3_B03_CD8 _2020-06-16,122.971,123.65,136.04,880.628,1598.39,39.3464,52.611,180.631,-40.1385,1033.23,11.1571,TRUE,-29.4620432083551,-7.61999814893192,"14"
export_JLL PEPT_B3_B03_CD8 _2020-06-16,4550.51,131.861,-160.798,394.805,389.878,249.511,118.923,19862.4,13289.6,279.253,12.2104,FALSE,13.9909914823074,47.4552906453156,"28"
export_JLL PEPT_B3_B03_CD8 _2020-06-16,30.0436,250.963,262.183,676.217,346.065,510.612,50.5596,6856.2,2137.23,61.2179,231.622,FALSE,6.38777663806941,23.970644159058,"10"
export_JLL PEPT_B3_B03_CD8 _2020-06-16,45.0414,114.467,257.18,-11.7185,839.355,852.356,19.2929,14783.4,143.589,-386.452,1005.09,TRUE,22.9886446592653,26.8667829106331,"8"
export_JLL PEPT_B3_B03_CD8 _2020-06-16,11765.8,262.044,378.665,3895.68,2750.15,32.2132,111.082,-161.415,44.9328,964.822,290.106,FALSE,46.9107685359374,-11.6728755103206,"1"
export_JLL PEPT_B3_B03_CD8 _2020-06-16,1710.26,125.271,181.445,1876.34,572.468,68.2224,25.6629,-472.761,761.82,-88.7763,-83.3103,FALSE,-9.62601671566286,-11.9921408624172,"9"
export_JLL PEPT_B3_B03_CD8 _2020-06-16,5908.17,34.3927,482.415,6.08915,131.013,36.5829,3.70449,15536.8,2454.29,346.466,282.874,FALSE,40.7130721819631,13.7646815186133,"29"
export_JLL PEPT_B3_B03_CD8 _2020-06-16,1773.76,705.03,2170.21,2966.92,2210.08,1558.63,334.644,1814.21,75.4701,1119.08,391.16,TRUE,0.0683835633338089,10.654756424366,"11"
export_JLL PEPT_B3_B03_CD8 _2020-06-16,2776.65,193.703,276.715,1574.61,1611.37,98.8107,-89.4016,573.38,692.262,396.351,36.6033,TRUE,-1.82409914122273,-20.2323347836314,"9"
export_JLL PEPT_B3_B03_CD8 _2020-06-16,10183.7,141.412,1015.52,1374.27,1096.25,206.297,79.9715,2547.7,1985.56,450.968,296.867,TRUE,41.0488206561201,-7.2803469070735,"1"
export_JLL PEPT_B3_B03_CD8 _2020-06-16,9202.29,92.6866,241.004,2602.26,1835.98,-2.69886,21.7367,105.59,21.5979,974.39,-124.041,FALSE,42.0370662331855,-14.1969863378952,"1"
export_JLL PEPT_B3_B03_CD8 _2020-06-16,55.0348,57.3448,170.589,858.317,1771.65,89.64,5.14825,2754.12,823.029,95.9271,98.1827,FALSE,-14.279869807974,5.19130226202909,"4"
export_JLL PEPT_B3_B03_CD8 _2020-06-16,414.98,216.259,307.594,268.65,1246.24,121.103,-217.186,188.062,156.634,18180.3,-105.061,TRUE,20.3601284009052,-3.57267426301593,"15"
export_JLL PEPT_B3_B03_CD8 _2020-06-16,583.954,127.01,176.121,1153.93,776.888,663.437,73.4343,9738.2,1942.7,58.7162,-183.39,TRUE,13.0800012897256,24.7789289854426,"8"
export_JLL PEPT_B3_B03_CD8 _2020-06-16,2995.48,107.096,233.544,4056.98,600.624,43.3677,97.4762,-199.609,1557.43,208.3,-2.66009,TRUE,2.87716121172248,-22.1801076638811,"9"
export_JLL PEPT_B3_B03_CD8 _2020-06-16,-40.7795,11.1565,186.128,88.5753,293.661,1303.56,132.775,9019.96,558.964,2.6289,256.459,TRUE,12.2266326483567,22.8322665766773,"8"
export_JLL PEPT_B3_B03_CD8 _2020-06-16,1.94601,205.949,374.94,367.283,224.598,1307.43,-2.06879,8311.07,748.398,510.772,-95.6725,TRUE,12.0864077888542,22.5268319744264,"8"
export_JLL PEPT_B3_B03_CD8 _2020-06-16,7352.01,64.0485,-1302.69,57.9736,109.694,73.629,-619.083,13349.1,33628.8,-701.256,3.84762,TRUE,14.2852714877436,49.2538429970106,"28"
export_JLL PEPT_B3_B03_CD8 _2020-06-16,158.755,2.95274,284.393,191.93,-11.8542,-45.5377,53.3325,11017.7,152.206,322.194,4493.11,TRUE,-3.26613231190433,37.1642292290977,"25"
export_JLL PEPT_B3_B03_CD8 _2020-06-16,58.7607,154.374,157.397,125.485,458.267,622.255,77.4921,5730.28,1421.89,-33.6889,370.718,FALSE,1.30870311995343,20.0974736305935,"3"
export_JLL PEPT_B3_B03_CD8 _2020-06-16,316.753,133.801,23.5605,543.758,2751.28,32.6792,188.971,-415.962,3810.85,-100.403,292.016,FALSE,-35.8424558612449,3.41546957624655,"5"
export_JLL PEPT_B3_B03_CD8 _2020-06-16,2674.63,377.294,425.075,952.714,63.9684,98.087,246.198,6259.13,714.174,253.477,208.061,TRUE,22.9731805381535,8.97213257752657,"9"
export_JLL PEPT_B3_B03_CD8 _2020-06-16,13661,531.831,20045.2,5535.04,1848.11,11.8447,-64.761,259052,716.728,46.8709,194.46,TRUE,39.6678147481094,33.0889785330837,"19"
export_JLL PEPT_B3_B03_CD8 _2020-06-16,1620.87,222.257,479.949,308.014,863.388,50.2495,66.3239,3471.84,585.386,224.581,94.4912,FALSE,-0.250468751217738,9.40281075936391,"5"
export_JLL PEPT_B3_B03_CD8 _2020-06-16,240.998,94.6513,502.844,154.223,73.7377,1328.37,41.7926,11951.6,1377.35,23.6133,60.1492,FALSE,22.2926008978999,24.3355709836902,"8"
export_JLL PEPT_B3_B03_CD8 _2020-06-16,11843.8,186.673,329.125,2464.44,1583.47,19.4986,718.588,438.945,980.797,618.968,118.534,FALSE,42.9911213289281,-6.00166757802628,"1"
export_JLL PEPT_B3_B03_CD8 _2020-06-16,208.017,118.406,283.249,481.534,607.207,605.015,46.5728,9200.87,155.409,993.008,108.541,TRUE,12.0656830977941,24.1866783355341,"8"
export_JLL PEPT_B3_B03_CD8 _2020-06-16,10762,191.791,433.943,1655,1573.38,162.014,647.607,252.044,48.2753,494.268,1077.44,FALSE,41.3131079360046,-6.74872370333596,"1"
export_JLL PEPT_B3_B03_CD8 _2020-06-16,658.098,97.8994,315.268,222.808,257.884,61.7535,-21.2504,554.218,-50.9079,1041.17,18.6225,FALSE,-18.3248985348173,1.26023299064949,"17"
export_JLL PEPT_B3_B03_CD8 _2020-06-16,6445.8,35.138,135.811,1713.27,1437.58,71.5661,61.5209,101.379,-21.9448,1049.47,-205.307,TRUE,26.1119419106959,-16.6636284735434,"1"
export_JLL PEPT_B3_B03_CD8 _2020-06-16,1074.84,334.558,1703.18,1120.06,786.122,1157.09,289.564,4991.44,715.321,657.896,328.801,TRUE,-4.59524571250994,19.1794966254879,"3"
export_JLL PEPT_B3_B03_CD8 _2020-06-16,190.425,187.255,38.5543,108.351,567.215,194.177,-24.3936,219.774,564.038,36.9357,187.638,FALSE,-30.0592560959003,3.68110449245155,"5"
export_JLL PEPT_B3_B03_CD8 _2020-06-16,6242.33,198.243,403.554,4120.94,1725.96,19.0789,31.5141,483.554,35.7693,1182.25,472.13,TRUE,26.4427986956019,-19.5007643442562,"1"
export_JLL PEPT_B3_B03_CD8 _2020-06-16,14970,129.287,235.42,2412.2,2033.4,8.58703,90.9597,61.0859,53.5844,0.875492,726.968,TRUE,46.149212709742,-6.87917148794485,"1"
export_JLL PEPT_B3_B03_CD8 _2020-06-16,6736.58,477.781,216.011,2507.86,1713.48,629.452,272.129,19063.1,4504.67,213.931,476.714,TRUE,39.7353676286518,12.2725120514749,"24"
export_JLL PEPT_B3_B03_CD8 _2020-06-16,17706.9,149.429,-774.029,191.441,138.479,54.1611,-253.606,20444,20451.4,-305.958,102.379,TRUE,46.5710496599401,-1.14448860196484,"24"
export_JLL PEPT_B3_B03_CD8 _2020-06-16,473.099,110.207,65.1862,152.471,912.383,404.521,-23.2444,11343.7,2751.62,-28.2165,81.2508,FALSE,19.2606748025803,30.799844388628,"28"
export_JLL PEPT_B3_B03_CD8 _2020-06-16,-16.2776,237.702,338.845,485.504,244.921,113.959,156.9,342.741,717.295,123.947,223.448,TRUE,-43.8905293404002,6.26171403023318,"5"
export_JLL PEPT_B3_B03_CD8 _2020-06-16,6880.4,318.538,793.035,1633.02,2398.92,193.475,20.6165,563.104,89.4924,3051.4,131.335,TRUE,29.2605626865793,-22.2203307539192,"1"
export_JLL PEPT_B3_B03_CD8 _2020-06-16,5065.36,-33.1203,-57.4971,85.2027,239.142,201.137,301.061,14250.1,11025.3,134.183,43.7976,FALSE,15.540712280446,41.3241621131323,"28"
export_JLL PEPT_B3_B03_CD8 _2020-06-16,4298.76,52.3003,-387.324,102.351,20.8793,32.8067,-422.334,8669.71,11606,-358.233,150.381,TRUE,9.61396871310621,38.120789441598,"28"
export_JLL PEPT_B3_B03_CD8 _2020-06-16,240.603,865.977,1250.46,1540.51,406.149,401.884,438.413,-61.7093,967.898,551.701,238.503,FALSE,-49.1773232597009,1.97847564862928,"7"
export_JLL PEPT_B3_B03_CD8 _2020-06-16,408.811,112.85,127.689,177.815,1174.96,129.46,-69.7239,4695.15,108.439,2185.99,-93.4076,FALSE,-1.33979946104961,8.74559774216485,"4"
export_JLL PEPT_B3_B03_CD8 _2020-06-16,890.432,90.0783,205.07,583.418,1065.89,114.625,-45.903,1724.82,791.872,145.695,267.332,TRUE,-28.2055427075854,9.6026515882294,"5"
export_JLL PEPT_B3_B03_CD8 _2020-06-16,4976.89,155.389,294.153,18.0339,309.586,60.8736,-5.38658,13920.8,711.01,-278.526,340.578,TRUE,35.67945955326,12.8078221931177,"29"
export_JLL PEPT_B3_B03_CD8 _2020-06-16,170.548,95.5529,274.275,250.62,469.273,275.024,-48.8098,10614.3,620.141,436.716,13.6232,FALSE,19.8423876195814,24.63884744766,"29"
export_JLL PEPT_B3_B03_CD8 _2020-06-16,1371.25,181.783,749.403,935.309,1627.94,45.2397,65.7768,1701.52,153.74,4211.41,3596.27,TRUE,-23.0338228290552,40.6120673007536,"22"
export_JLL PEPT_B3_B03_CD8 _2020-06-16,11940.3,183.318,219.074,3046.25,2410.63,25.8875,27.3803,87.8878,1257.23,178.724,228.706,TRUE,44.2753746914121,-9.19760359405665,"1"
export_JLL PEPT_B3_B03_CD8 _2020-06-16,40.046,12.5459,227.047,161.484,1258.18,355.225,-39.5832,11343.8,604.115,155.281,-94.3828,TRUE,18.6372329801256,26.2509841585105,"8"
export_JLL PEPT_B3_B03_CD8 _2020-06-16,233.527,129.353,305.607,229.425,2729.75,2972.43,51.5749,6589.9,183.646,1796.85,5307.46,FALSE,-2.531990526564,20.8243938497752,"3"
export_JLL PEPT_B3_B03_CD8 _2020-06-16,815.277,173.381,183.787,1587.45,2073.82,-19.2183,-48.978,93.8308,757.353,410.288,47.8682,FALSE,-17.0725395859652,-19.21110711094,"5"
export_JLL PEPT_B3_B03_CD8 _2020-06-16,1973.91,137.317,162.826,1318.21,1968.86,83.1081,-100.645,1727.77,200.022,12373,-205.945,TRUE,16.0034844376917,-5.61648429743704,"15"
export_JLL PEPT_B3_B03_CD8 _2020-06-16,953.486,160.372,185.855,197.071,878.904,198.291,126.368,6164.22,958.825,64.2999,167.759,TRUE,4.04063124009884,21.9145930686743,"10"
export_JLL PEPT_B3_B03_CD8 _2020-06-16,869.295,107.485,159.564,259.227,237.425,173.893,720.213,-391.183,3169.09,78.4798,94.6234,FALSE,-33.6483475389353,16.721857256997,"27"
export_JLL PEPT_B3_B03_CD8 _2020-06-16,14398.9,51.7596,151.031,1230.34,1380.68,-41.8461,148.677,301.16,131.674,1484.87,750.607,FALSE,46.6259856769804,-4.15343357873155,"1"
export_JLL PEPT_B3_B03_CD8 _2020-06-16,8163.6,259.906,29.097,523.05,-4.3517,181.622,260.622,35950.4,6759.23,0.540419,881.751,TRUE,42.6382435277662,10.7129593978102,"21"
export_JLL PEPT_B3_B03_CD8 _2020-06-16,5115.62,20.9042,254.299,83.8315,163.417,69.9754,114.241,2578.64,788.587,-125.546,-38.5921,FALSE,30.9571982751851,-2.63846553619646,"9"
export_JLL PEPT_B3_B03_CD8 _2020-06-16,12194,107.688,143.638,5313.89,1964.74,-27.7341,-34.3122,153.14,266.711,134.123,840.351,TRUE,44.7592848012762,-8.87232466858738,"1"
export_JLL PEPT_B3_B03_CD8 _2020-06-16,16075.1,266.693,254.023,2117.89,1263.97,47.1742,79.8011,-27.0953,27.2103,887.287,285.245,FALSE,47.5605637566459,-2.89975866561584,"1"
export_JLL PEPT_B3_B03_CD8 _2020-06-16,6641.96,134.728,-1003.75,116.341,70.7949,74.7133,705.867,19379.5,25579.2,-86.8833,-99.146,FALSE,10.0454642396651,53.2251016615314,"28"
export_JLL PEPT_B3_B03_CD8 _2020-06-16,632.435,77.6102,-574.684,93.1512,224.996,109.291,-3.50686,21032.5,31903.5,29.7565,93.5961,FALSE,11.1397747294302,47.2276009730169,"28"
export_JLL PEPT_B3_B03_CD8 _2020-06-16,14357.1,97.0524,513.595,2139.3,2281.68,88.0768,-25.917,474.851,452.584,1489.79,345.358,TRUE,45.9735697147377,-7.2180247506929,"1"
export_JLL PEPT_B3_B03_CD8 _2020-06-16,2211.12,165.677,480.445,1216.1,1608.49,-2.44181,-32.1455,522.21,107.502,918.27,362.584,TRUE,-4.64272510055149,-14.6423904846513,"6"
export_JLL PEPT_B3_B03_CD8 _2020-06-16,431.321,149.641,-66.4006,203.358,93.0022,122.413,-70.1664,1208.73,5620.88,346.827,2471.58,TRUE,-10.2514284591126,41.4233011535479,"27"
export_JLL PEPT_B3_B03_CD8 _2020-06-16,8913.57,83.5111,220.867,1224.51,1933.02,37.4626,-15.9526,-591.212,61.5165,970.004,-57.2794,TRUE,38.6008392952905,-15.6427038319998,"1"
export_JLL PEPT_B3_B03_CD8 _2020-06-16,6526.75,166.149,290.487,205.007,-24.429,144.656,693.529,12241.8,636.208,409.936,572.932,TRUE,37.6085954372413,9.76273637588632,"29"
export_JLL PEPT_B3_B03_CD8 _2020-06-16,412.224,174.574,181.392,251.292,359.252,167.716,-35.5017,124.55,568.188,-94.403,32.1137,FALSE,-30.9941933661476,4.11098253055659,"5"
export_JLL PEPT_B3_B03_CD8 _2020-06-16,10936.4,133.612,237.311,3432.88,2957.72,-37.5897,-22.9011,-472.498,736.046,127.283,432.799,FALSE,46.0987748362082,-12.3641554374513,"1"
export_JLL PEPT_B3_B03_CD8 _2020-06-16,1002.35,3.74357,212.632,115.163,374.793,273.852,1.19878,9803.05,807.325,58.207,-70.1872,TRUE,15.0607106531263,25.7345269234724,"10"
export_JLL PEPT_B3_B03_CD8 _2020-06-16,152.15,99.0985,246.41,542.57,160.694,167.038,-5.67412,2911.24,1064.61,-75.0065,199.744,TRUE,-22.5639783010528,14.0542231509751,"5"
export_JLL PEPT_B3_B03_CD8 _2020-06-16,11698.6,167.761,279.752,1413.71,2126.66,-35.9566,19.8786,123.36,40.51,1168.54,31.6557,FALSE,45.1053453579322,-10.2926115041674,"1"
export_JLL PEPT_B3_B03_CD8 _2020-06-16,-440.828,139.039,315.161,210.181,1079.1,39.6684,32.4017,-288.514,-8.13557,107.795,5698.39,TRUE,-17.0385388529421,44.169884920521,"22"
export_JLL PEPT_B3_B03_CD8 _2020-06-16,2465.09,162.668,112.008,-16.3117,73.0962,252.339,403.774,19058.1,9552.45,4.6107,51.0804,TRUE,18.2073889075062,38.190153283874,"28"
export_JLL PEPT_B3_B03_CD8 _2020-06-16,9048.2,498.438,1899.94,4702.63,4024.12,1416.24,141.008,957.673,293.341,1379.26,1037.03,FALSE,31.2623156831307,-14.0983610470279,"11"
export_JLL PEPT_B3_B03_CD8 _2020-06-16,-31.8359,146.826,37.2271,140.668,763.557,315.892,32.2485,-295.949,1363.23,-16.1055,158.043,FALSE,-41.9573979071784,6.06430506158214,"5"
export_JLL PEPT_B3_B03_CD8 _2020-06-16,165.477,164.738,-9.00399,123.401,189.91,162.83,-117.055,753.365,2639.6,-58.9319,314.431,FALSE,-39.7364555576018,13.4099886856428,"27"
export_JLL PEPT_B3_B03_CD8 _2020-06-16,376.726,144.711,361.057,439.287,100.535,44.8964,136.04,41196.5,2145.99,-139.467,176.453,FALSE,37.9551425325857,33.0986065250497,"19"
export_JLL PEPT_B3_B03_CD8 _2020-06-16,203.601,91.2241,159.714,102.839,261.144,33.0108,51.335,19.226,712.68,-238.799,405.852,TRUE,-40.8582308882244,5.37030823685154,"5"
export_JLL PEPT_B3_B03_CD8 _2020-06-16,1947.8,170.905,482.563,619.974,1941.5,165.749,-51.8679,2523.69,120.53,1197.91,333.964,FALSE,-2.52063921902174,-5.78280312423775,"4"
export_JLL PEPT_B3_B03_CD8 _2020-06-16,1181.75,220.486,220.628,593.68,486.712,244.043,151.237,4612.41,1541.37,9.07431,222.831,FALSE,-2.58151627421661,18.3331188878751,"10"
export_JLL PEPT_B3_B03_CD8 _2020-06-16,973.762,87.9766,167.31,52.8721,1157.46,177.483,27.3413,1456.16,871.074,146.871,178.572,FALSE,-28.3523955076893,4.44000687793837,"5"
export_JLL PEPT_B3_B03_CD8 _2020-06-16,3069.37,104.366,109.459,893.193,1547.58,23.9542,-29.1223,-142.577,1205.25,12.4906,200.69,FALSE,5.04919352660525,-19.4627859741049,"9"
export_JLL PEPT_B3_B03_CD8 _2020-06-16,4017.71,52.8736,-59.8159,113.953,236.842,227.425,560.258,14608.4,8054.29,61.7238,312.029,FALSE,18.8616867996958,37.7377578952673,"24"
export_JLL PEPT_B3_B03_CD8 _2020-06-16,1495.85,282.318,567.43,2234.77,2868.6,236.985,222.271,3684.41,133.446,1070.67,30.6774,FALSE,-9.98680810334627,-13.7741577197092,"4"
export_JLL PEPT_B3_B03_CD8 _2020-06-16,230.567,231.652,182.537,178.284,592.906,297.429,-13.5084,1180.16,654.039,303.209,43.4409,FALSE,-27.7880474542336,8.20113136210421,"5"
export_JLL PEPT_B3_B03_CD8 _2020-06-16,1460.79,931.016,4948.61,3230.02,2042.27,1870.99,352.384,2587.07,496.232,1095.62,583.165,FALSE,2.34004238537453,13.4929647828551,"11"
export_JLL PEPT_B3_B03_CD8 _2020-06-16,554.039,389.221,1239.86,851.674,1664.73,233.822,-113.166,1407.02,88.9235,2472.83,981,TRUE,-17.8051086658961,-5.68010021986688,"15"
export_JLL PEPT_B3_B03_CD8 _2020-06-16,-77.7253,186.3,189.575,2035.94,587.736,138.37,13.5311,2467.46,552.494,-99.8563,184.724,FALSE,-20.1507689989538,7.12315301182838,"5"
export_JLL PEPT_B3_B03_CD8 _2020-06-16,56.5048,195.067,194.948,791.831,414.427,148.714,-20.2161,1631.36,1312.97,248.589,98.072,FALSE,-30.8946969800628,9.15426286050692,"5"
export_JLL PEPT_B3_B03_CD8 _2020-06-16,338.16,536.189,827.026,2982.86,556.563,406.218,373.836,371.585,1149.26,641.557,348.775,TRUE,-49.5647333812634,3.46774373837118,"7"
export_JLL PEPT_B3_B03_CD8 _2020-06-16,576.881,190.519,297.482,1053.95,583.859,59.8236,82.2051,374.245,1215.22,682.92,-15.773,FALSE,-39.842160202555,1.80347514786646,"5"
export_JLL PEPT_B3_B03_CD8 _2020-06-16,254.73,1297.91,751.197,1741.5,469.398,468.243,558.183,281.215,3201.62,144.147,342.564,TRUE,-50.6632937846472,3.81674750562279,"7"
export_JLL PEPT_B3_B03_CD8 _2020-06-16,310.886,129.892,214.743,314.668,1115.51,931.089,35.5712,1232.85,1619.35,28.7235,90.5673,TRUE,-27.8014200667455,17.4902821175643,"3"
export_JLL PEPT_B3_B03_CD8 _2020-06-16,308.933,120.564,153.174,227.867,48.2565,271.901,2.24837,4900.35,651.922,269.851,-29.7212,TRUE,-10.8645073263599,20.4268093015001,"5"
export_JLL PEPT_B3_B03_CD8 _2020-06-16,945.927,270.064,423.682,949.822,2055.48,125.455,113.213,1609.16,59.1354,806.207,2762.7,FALSE,-12.8888122704188,1.78005879613089,"25"
export_JLL PEPT_B3_B03_CD8 _2020-06-16,1075.42,170.279,-1119.04,13.1844,343.684,122.779,-125.045,20014.8,35816.9,-281.227,607.081,FALSE,9.38331091703381,50.8997634474133,"28"
export_JLL PEPT_B3_B03_CD8 _2020-06-16,2744.62,65.9224,157.105,1442.36,1398.97,185.873,-12.9878,715.394,2902.76,94.9336,253.945,FALSE,-0.495417493892401,-13.1591093478291,"9"
export_JLL PEPT_B3_B03_CD8 _2020-06-16,-90.2785,69.2823,95.5455,184.617,299.303,739.408,87.5677,1848.13,848.587,412.465,150.624,TRUE,-27.8290403695496,15.7301160410209,"5"
export_JLL PEPT_B3_B03_CD8 _2020-06-16,7096.17,177.568,199.103,3809.44,2703.15,114.387,7.44057,-539.84,563.835,455.708,222.541,FALSE,37.7357894402143,-21.2639950929854,"1"
export_JLL PEPT_B3_B03_CD8 _2020-06-16,1035.37,131.521,109.115,25.9185,850.033,1029.13,36.058,4808.9,588.779,55.2554,-27.8062,FALSE,2.616934635502,16.4199714140301,"3"
export_JLL PEPT_B3_B03_CD8 _2020-06-16,1057.96,192.215,279.474,586.242,95.7262,53.5798,12.6182,1802.36,679.317,283.954,208.777,TRUE,-28.8513638276694,9.72429570799832,"5"
export_JLL PEPT_B3_B03_CD8 _2020-06-16,97.3918,902.256,675.021,868.696,319.831,267.615,329.076,1194.79,1538.62,148.856,278.106,FALSE,-51.5063296455734,3.78171165475726,"7"
export_JLL PEPT_B3_B03_CD8 _2020-06-16,2113.61,-24.5182,-1385.44,144.095,276.521,11.5313,997.62,21878.3,30776.7,-684.586,568.689,FALSE,14.2250902196309,43.4478198690856,"28"
export_JLL PEPT_B3_B03_CD8 _2020-06-16,340.47,168.465,3.19062,109.99,759.463,535.262,-39.1451,37.0489,2337.17,399.731,-126.35,FALSE,-44.8923210616492,10.6139018506407,"5"
export_JLL PEPT_B3_B03_CD8 _2020-06-16,446.137,181.054,147.731,150.964,351.778,136.246,-8.22006,4047.56,55.8184,2426.03,655.919,FALSE,-9.03568891276877,11.0990920893032,"2"
export_JLL PEPT_B3_B03_CD8 _2020-06-16,8336.36,295.06,409.598,1581.06,1229.63,35.7689,62.0909,553.423,279.907,3283.45,279.912,TRUE,37.0802954738079,-16.062815558697,"1"
export_JLL PEPT_B3_B03_CD8 _2020-06-16,1294.76,153.232,1152.26,351.157,942.962,120.393,-0.800953,26590.7,18199.4,530.842,-154.887,FALSE,15.0824136233589,45.015383596446,"28"
export_JLL PEPT_B3_B03_CD8 _2020-06-16,641.765,55.6374,85.445,71.3588,-41.0716,135.025,-29.9283,4792.76,895.645,294.175,-51.6969,FALSE,-4.00924911569235,17.4628069915659,"5"
export_JLL PEPT_B3_B03_CD8 _2020-06-16,1003.19,205.199,-603.6,204.911,294.198,950.541,1330.73,24033.6,25901.8,73.2121,207.356,FALSE,20.4933826482182,37.9124965152949,"28"
export_JLL PEPT_B3_B03_CD8 _2020-06-16,379.444,635.838,609.67,2314.65,377.871,277.532,222.712,86.07,2050.81,803.504,158.609,TRUE,-49.2823454491728,2.89651625802161,"7"
export_JLL PEPT_B3_B03_CD8 _2020-06-16,9510.19,20.1395,215.584,978.249,1913.79,-120.56,13.2694,431.814,97.5848,1044.82,695.449,TRUE,41.224829495993,-12.2965785987284,"1"
export_JLL PEPT_B3_B03_CD8 _2020-06-16,4129.47,128.146,300.986,6.0686,548.875,1155.53,-55.9431,15487.1,4755.66,189.452,-16.0353,TRUE,37.0866332354631,13.2856121408075,"28"
export_JLL PEPT_B3_B03_CD8 _2020-06-16,2942.65,77.5061,64.8688,71.5215,117.123,99.3879,734.129,19535.1,5307.1,-43.7932,249.859,FALSE,23.7548185415907,34.8732611183024,"28"
export_JLL PEPT_B3_B03_CD8 _2020-06-16,673.79,196.476,179.539,450.628,191.685,91.4425,17.7894,9446.32,608.292,-130.954,281.04,FALSE,17.7731349754528,24.4946594360511,"10"
export_JLL PEPT_B3_B03_CD8 _2020-06-16,9796.6,132.728,476.861,91.2245,208.069,1101.53,415.203,17807.2,1201.04,66.2438,612.474,FALSE,42.0643479998721,8.34755917452724,"21"
export_JLL PEPT_B3_B03_CD8 _2020-06-16,183.842,228.536,471.808,269.038,1152.07,535.632,24.668,3418.99,127.275,1038.08,205.1,FALSE,-11.8977594368347,14.6063933840296,"4"
export_JLL PEPT_B3_B03_CD8 _2020-06-16,131.05,105.61,239.886,240.608,6.43284,101.287,1.50644,2323.17,2260.92,28.6875,161.101,FALSE,-22.9990508011978,17.3906094147068,"5"
export_JLL PEPT_B3_B03_CD8 _2020-06-16,1623.95,103.331,243.483,261.163,272.106,179.032,236.202,3082.19,80.9033,1802.89,1154.09,TRUE,-18.6391715814655,19.3332203388411,"17"
export_JLL PEPT_B3_B03_CD8 _2020-06-16,350.299,283.39,764.446,1401.45,2301.57,305.197,-87.874,4563.93,261.593,1869.1,457.463,TRUE,-9.25752590688943,5.66562584995485,"4"
export_JLL PEPT_B3_B03_CD8 _2020-06-16,55.8456,120.804,241.154,92.8249,571.746,253.798,-64.1476,2474.86,47.1963,929.109,335.985,FALSE,-16.2591429289719,9.71357413558399,"17"
export_JLL PEPT_B3_B03_CD8 _2020-06-16,16472,65.4163,205.015,981.04,2196.39,107.369,117.821,175.312,87.4664,345.246,3294.96,TRUE,45.9865779870456,-5.92714828356576,"1"
export_JLL PEPT_B3_B03_CD8 _2020-06-16,183.301,105.811,31.3676,80.5302,589.905,123.748,262.14,781.54,4859.68,-54.4546,150.575,FALSE,-26.092792182689,25.4358583736972,"27"
export_JLL PEPT_B3_B03_CD8 _2020-06-16,1009.08,90.7808,392.633,427.124,930.747,197.546,-54.5296,26931.6,621.332,100.706,209.967,TRUE,33.3161909043285,33.3894127580829,"19"
export_JLL PEPT_B3_B03_CD8 _2020-06-16,331.144,150.687,155.603,436.164,786.274,879.767,83.7824,2173.44,1141.11,8.64957,30.6018,TRUE,-27.6669580488533,17.5758710084382,"3"
export_JLL PEPT_B3_B03_CD8 _2020-06-16,969.896,655.068,1058.64,8773.07,1749.43,549.25,346.094,701.723,250.519,1575.25,675.628,FALSE,-30.8072260991322,-18.1711790179711,"7"
export_JLL PEPT_B3_B03_CD8 _2020-06-16,1361.91,181.726,242.504,100.724,67.5331,-25.6029,629.821,4588.62,80.9869,104.357,26740.5,TRUE,-3.65544446311726,61.5434232321648,"20"
export_JLL PEPT_B3_B03_CD8 _2020-06-16,792.078,204.277,262.675,244.773,1258.69,189.964,104.728,4796.9,1093.44,346.651,-12.8644,FALSE,-3.1994143012732,17.3693982943516,"4"
export_JLL PEPT_B3_B03_CD8 _2020-06-16,-199.181,52.0835,478.252,53.228,133.132,446.782,51.2863,17310.6,592.115,-19.5769,304.019,FALSE,29.7689054119907,29.8860240880466,"19"
export_JLL PEPT_B3_B03_CD8 _2020-06-16,22.2373,170.879,127.944,525.996,1035.38,325.424,34.6539,4992.58,986.117,170.106,-15.955,FALSE,-5.52291637954899,17.3949483119785,"3"
export_JLL PEPT_B3_B03_CD8 _2020-06-16,491.742,139.419,271.361,233.117,216.426,144.924,-55.4863,3458.11,-26.3309,3035.08,-226.311,TRUE,-12.3848155784679,12.7366646573279,"17"
export_JLL PEPT_B3_B03_CD8 _2020-06-16,6312.24,132.131,332.799,2610.96,1408.6,380.041,88.0182,296.031,60.395,976.702,113.72,FALSE,27.2038852500706,-16.2458051275666,"1"
export_JLL PEPT_B3_B03_CD8 _2020-06-16,4804.47,1185.02,-33.8159,2109.39,318.187,187.999,345.092,5869.01,10626.1,-90.0458,230.773,FALSE,10.6228650759432,39.3377846141606,"24"
export_JLL PEPT_B3_B03_CD8 _2020-06-16,289.917,152.906,133.284,256.669,421.069,291.635,39.1735,863.458,581.83,359.308,-124.257,TRUE,-38.5288656722861,7.36093466904489,"5"
export_JLL PEPT_B3_B03_CD8 _2020-06-16,-46.2355,162.523,157.914,91.4435,775.407,249.653,144.802,6468.21,683.102,84.9232,166.841,FALSE,3.61045772346103,18.4580597656415,"10"
export_JLL PEPT_B3_B03_CD8 _2020-06-16,14491.1,205.508,621.743,133.395,211.983,-24.3552,264.569,36799,577.882,139.349,62.5052,TRUE,43.275985433096,9.63721544603121,"21"
export_JLL PEPT_B3_B03_CD8 _2020-06-16,8738.29,10.7073,294.476,321.818,669.245,1236.83,151.523,21079.7,734.406,167.23,264.702,FALSE,42.6757065736056,12.2447308702542,"21"
export_JLL PEPT_B3_B03_CD8 _2020-06-16,480.854,165.49,631.961,1166.11,541.472,124.06,28.1515,3592.43,251.115,2348.63,351.88,TRUE,-13.4582269996621,12.4099849348239,"2"
export_JLL PEPT_B3_B03_CD8 _2020-06-16,312.611,73.1638,124.126,113.324,1429.66,538.586,99.5064,1370.99,1431.78,62.977,63.5495,FALSE,-35.2416152330604,8.1713322526127,"5"
export_JLL PEPT_B3_B03_CD8 _2020-06-16,3433.25,97.8176,310.269,209.072,-61.09,117.229,295.352,10494.8,1016.11,392.96,193.553,FALSE,36.6885842488871,12.1620605851809,"29"
export_JLL PEPT_B3_B03_CD8 _2020-06-16,669.92,251.623,928.605,813.779,2267.42,858.429,34.6635,15252.3,72.6743,1268.41,400.148,FALSE,26.7104601072946,26.5115193567499,"19"
export_JLL PEPT_B3_B03_CD8 _2020-06-16,562.939,177.069,158.801,120.25,422.568,148.435,103.725,18446.8,1286.32,32.3223,-78.8143,FALSE,28.9648263540964,32.3011786702828,"19"
export_JLL PEPT_B3_B03_CD8 _2020-06-16,-3.56137,111.996,223.979,249.577,-79.7747,763.904,52.9575,4515.47,718.019,215.938,163.784,TRUE,-8.47309148342985,20.0216637675328,"3"
export_JLL PEPT_B3_B03_CD8 _2020-06-16,139.623,40.6193,118.632,313.81,1911.17,101.66,22.2396,10611.4,2683.99,490.272,10.8109,FALSE,16.2580568757832,30.0846488459447,"10"
export_JLL PEPT_B3_B03_CD8 _2020-06-16,5786.05,161.421,288.061,796.751,100.195,60.1024,235.198,183.137,61.4307,1396.07,184.793,TRUE,23.2524954464955,-15.2394244962144,"9"
export_JLL PEPT_B3_B03_CD8 _2020-06-16,6653.14,148.238,-663.04,52.8887,229.739,47.9449,437.104,9303.32,16927.4,199.552,9.98236,FALSE,12.7458652408308,43.427839837126,"28"
export_JLL PEPT_B3_B03_CD8 _2020-06-16,199.328,122.157,180.702,113.77,832.231,314.554,3.55541,92.5886,721.177,-131.708,62.6215,TRUE,-39.4987289919383,2.51980381910478,"5"
export_JLL PEPT_B3_B03_CD8 _2020-06-16,1674.9,127.325,391.551,752.171,1669.18,781.959,-30.4677,18361.1,5077.5,-87.3772,25.0707,FALSE,25.6889285349475,36.8398047393548,"28"
export_JLL PEPT_B3_B03_CD8 _2020-06-16,9035.04,36.8916,241.932,95.7042,107.08,243.367,74.9718,17594.6,2861.8,154.124,101.641,TRUE,40.7046696267421,8.62883856435173,"21"
export_JLL PEPT_B3_B03_CD8 _2020-06-16,9362.08,122.283,241.471,2445.83,1679.15,66.9133,54.3087,227.055,771.736,288.415,44.2636,FALSE,41.6651034327272,-12.859644847833,"1"
export_JLL PEPT_B3_B03_CD8 _2020-06-16,309.31,194.284,140.09,221.04,176.101,171.213,181.614,5254.14,2148.69,-42.2964,274.699,FALSE,0.665912982026327,23.7121431233713,"10"
export_JLL PEPT_B3_B03_CD8 _2020-06-16,5129.02,217.717,255.264,393.044,257.998,141.907,66.2302,8138.96,81.9194,1021.07,398.034,TRUE,32.7251631665393,5.61157545645228,"29"
export_JLL PEPT_B3_B03_CD8 _2020-06-16,216.926,1131.34,1543.75,3234.37,489.43,266.352,906.316,-74.5808,1008.14,418.743,685.537,FALSE,-55.3038221140301,2.31060481297877,"7"
export_JLL PEPT_B3_B03_CD8 _2020-06-16,5352.49,168.39,128.246,606.022,225.74,10.4266,-50.1666,3843.93,-37.4358,885.515,-36.9902,FALSE,30.9993722882095,4.16607239896021,"9"
export_JLL PEPT_B3_B03_CD8 _2020-06-16,-132.93,67.9145,73.0033,497.229,958.722,309.139,48.1,12724.1,1519.43,271.752,41.721,FALSE,21.8586026347948,29.6618556411157,"8"
export_JLL PEPT_B3_B03_CD8 _2020-06-16,4686.87,197.268,144.309,129.934,240.709,915.121,26.5039,15047.6,3269.35,43.9012,265.639,TRUE,37.0427743297025,13.177141481892,"28"
export_JLL PEPT_B3_B03_CD8 _2020-06-16,3791.63,86.451,316.344,178.288,462.973,724.281,-41.006,32052.9,1685.39,271.476,390.156,FALSE,34.9026073631947,29.9336647092845,"21"
export_JLL PEPT_B3_B03_CD8 _2020-06-16,45.2372,368.427,731.354,1237.09,1003.11,183.186,119.152,5752.08,3.47126,1549.1,550.189,TRUE,-10.4673224743955,24.2263105790959,"8"
export_JLL PEPT_B3_B03_CD8 _2020-06-16,970.895,196.877,194.396,1386.04,2311.94,163.239,159.841,1393.17,20.8011,951.502,-139.864,TRUE,-16.0097659238139,-19.2733917824787,"4"
export_JLL PEPT_B3_B03_CD8 _2020-06-16,23.2155,118.178,41.8158,70.9,331.824,109.998,-112.561,-112.376,1420.22,160.237,168.88,FALSE,-36.069103550242,6.46048924352163,"5"
export_JLL PEPT_B3_B03_CD8 _2020-06-16,9347.69,150.009,223.599,3778.76,2333.84,84.7442,-31.1183,126.881,22.8083,933.952,-10.2019,FALSE,43.2960674808452,-15.2932019248153,"1"
export_JLL PEPT_B3_B03_CD8 _2020-06-16,8676.78,149.1,36.8435,1841.03,778.594,-3.95233,16.0666,155.96,163.904,113.618,1875.97,TRUE,35.4697878941599,-13.0795614956428,"1"
export_JLL PEPT_B3_B03_CD8 _2020-06-16,370.195,63.1958,121.548,116.931,206.352,271.39,47.4317,296.012,691.77,302,-102.13,FALSE,-35.1505763792435,7.99267393083663,"5"
export_JLL PEPT_B3_B03_CD8 _2020-06-16,180.983,192.546,848.835,342.822,768.294,597.367,-47.5368,6502.77,129.863,2179.88,558.744,FALSE,6.47170954964267,17.3370517567597,"3"
export_JLL PEPT_B3_B03_CD8 _2020-06-16,352.821,38.7689,175.344,9.39404,403.802,535.063,69.5215,8537.89,581.765,-26.2026,206.318,FALSE,14.6348684812204,21.1310433852918,"8"
export_JLL PEPT_B3_B03_CD8 _2020-06-16,109.516,135.085,111.559,281.967,722.232,2483.08,108.416,8287.16,8001.58,37.0849,419.33,FALSE,15.6806884612341,36.3105407647527,"28"
export_JLL PEPT_B3_B03_CD8 _2020-06-16,2056.19,15.1609,235.524,91.3382,1241.52,128.1,14.057,2736.97,-41.8522,132.95,1850.52,FALSE,1.76398450525364,6.84528786280296,"9"
export_JLL PEPT_B3_B03_CD8 _2020-06-16,3464.08,227.883,-1223.22,627.366,131.344,150.265,-183.02,9768.07,40303.7,-284.676,86.0581,FALSE,-1.01453517623907,60.9396239481615,"28"
export_JLL PEPT_B3_B03_CD8 _2020-06-16,2075.22,217.984,616.94,1214.28,2615.16,117.976,-61.4442,451.744,557.673,-154.936,190.182,TRUE,-3.87046633647493,-25.7140428545318,"9"
export_JLL PEPT_B3_B03_CD8 _2020-06-16,3476.71,112.342,-434.066,16.809,65.4943,193.119,1148.62,14543.2,22023.5,349.047,267.887,FALSE,14.0724199467775,42.7041747373704,"28"
export_JLL PEPT_B3_B03_CD8 _2020-06-16,751.641,-58.7218,242.687,86.8492,698.331,79.6922,-142.931,4990.03,151.214,6292.6,5.47841,TRUE,14.5584367192329,4.29207835106198,"15"
export_JLL PEPT_B3_B03_CD8 _2020-06-16,165.912,221.875,142.118,40.5709,302.603,1512.39,85.4348,5256.25,641.237,270.855,155.747,TRUE,-2.75320173882735,18.5746197870071,"3"
export_JLL PEPT_B3_B03_CD8 _2020-06-16,410.452,102.209,199.923,411.246,959.989,541.163,57.8646,15588.5,-56.5135,282.84,3737.61,TRUE,12.3467233108415,33.3892607402983,"8"
export_JLL PEPT_B3_B03_CD8 _2020-06-16,681.137,1377.97,-281.329,42.428,504.985,109.665,226.623,27938.2,40186.2,167.769,5253.3,TRUE,14.3722791310814,49.6656388025117,"28"
export_JLL PEPT_B3_B03_CD8 _2020-06-16,249.878,208.858,600.207,307.429,466.601,30.0496,22.7441,637.714,82.0038,989.81,329.984,FALSE,-21.6836511999571,-0.255182106918473,"17"
export_JLL PEPT_B3_B03_CD8 _2020-06-16,28.5101,172.88,170.717,167.198,1000.94,595.103,46.227,11402.6,739.211,-119.13,375.589,TRUE,18.3342301051672,25.9599527888653,"8"
export_JLL PEPT_B3_B03_CD8 _2020-06-16,1469.32,196.832,180.94,408.487,-21.81,195.758,61.7569,384.405,-8.38302,1153.57,151.214,TRUE,-29.4797514987929,5.47271515996934,"17"
export_JLL PEPT_B3_B03_CD8 _2020-06-16,-243.651,132.1,168.626,117.585,909.34,246.433,89.5484,-128.654,2357.41,-179.176,263.272,FALSE,-47.2242296760209,8.7811439011515,"5"
export_JLL PEPT_B3_B03_CD8 _2020-06-16,812.913,96.9015,162.113,190.474,1144.09,996.473,30.2142,29.6085,843.558,114.971,170.844,TRUE,-32.8503642759435,15.8397206058644,"5"
export_JLL PEPT_B3_B03_CD8 _2020-06-16,355.173,57.9445,210.87,785.891,1634.95,153.777,10.9762,1071.66,35.7294,-20.873,1069.06,FALSE,-25.686719464918,-8.20689994358669,"14"
export_JLL PEPT_B3_B03_CD8 _2020-06-16,14933.1,0.727998,357.16,111.225,-36.6887,-77.3626,107.246,33169.7,1126.03,549.017,-82.9851,TRUE,43.2521771432119,9.5716316466049,"21"
export_JLL PEPT_B3_B03_CD8 _2020-06-16,-264.738,312.055,505.84,1552.75,4081.85,64.1435,-58.0664,864.762,333.098,1230.93,655.387,FALSE,-28.0930026978773,-30.4535216174516,"14"
export_JLL PEPT_B3_B03_CD8 _2020-06-16,2746.55,121.911,259.335,78.242,654.622,57.7208,-36.6717,15587.6,131.027,2393.31,29.7309,FALSE,39.8241610448917,17.1319234853777,"29"
export_JLL PEPT_B3_B03_CD8 _2020-06-16,22.4424,93.4893,230.105,84.7064,208.765,275.38,68.6787,181.624,-13.3578,76.3121,756.313,FALSE,-27.5340382381688,17.7685888263579,"17"
export_JLL PEPT_B3_B03_CD8 _2020-06-16,234.275,86.7564,80.6576,125.979,658.869,789.888,-65.8384,1784.07,1961.76,14.5932,-74.2791,TRUE,-27.6114671405177,17.3946201391014,"3"
export_JLL PEPT_B3_B03_CD8 _2020-06-16,5086.32,437.32,301.748,963.586,492.233,135.604,109.509,7272.06,2423.95,727.745,140.497,TRUE,33.3519602368035,6.16314935630841,"24"
export_JLL PEPT_B3_B03_CD8 _2020-06-16,17013.6,399.185,246.258,4401.78,1973.52,139.502,60.5456,259.505,2011.66,465.599,5.43401,TRUE,47.029792861106,-6.00001084654534,"1"
export_JLL PEPT_B3_B03_CD8 _2020-06-16,1447.6,107.298,264.402,144.505,945.21,355.785,52.9873,10749.1,2544.66,324.706,-71.0148,TRUE,14.4360203827012,27.0759510102328,"10"
export_JLL PEPT_B3_B03_CD8 _2020-06-16,417.613,65.5386,56.9682,393.258,1420.25,1982.05,-117.539,6827.9,2079.61,-279.636,222.326,FALSE,11.7769941491275,18.9337603782118,"3"
export_JLL PEPT_B3_B03_CD8 _2020-06-16,515.909,85.39,225.593,147.097,-27.2419,138.565,468.465,21123.8,8633.78,-76.8855,288.274,FALSE,23.692176519404,39.8978029614438,"28"
export_JLL PEPT_B3_B03_CD8 _2020-06-16,8971.67,82.466,40.8291,2143.07,1809.38,-68.9709,102.115,-201.068,56.6424,-121.406,2888.5,TRUE,35.1972875395734,-12.4728480910089,"1"
export_JLL PEPT_B3_B03_CD8 _2020-06-16,-91.129,160.588,391.022,184.953,2166.65,1607.47,59.461,7591.87,67.9845,216.707,2105.46,FALSE,10.6910974209409,20.9102750147078,"3"
export_JLL PEPT_B3_B03_CD8 _2020-06-16,2883.8,76.4671,146.636,2064.23,1381.78,98.9725,136.521,260.276,66.8324,703.209,898.249,FALSE,2.92975620577656,-13.585973142705,"6"
export_JLL PEPT_B3_B03_CD8 _2020-06-16,351.628,102.692,128.569,104.763,1693.3,2285.87,19.5332,5265.3,607.207,466.293,236.493,FALSE,7.13566332182544,15.1423380088798,"3"
export_JLL PEPT_B3_B03_CD8 _2020-06-16,231.565,152.54,115.764,91.5688,1101.83,179.157,-195.896,654.231,321.017,30091,-477.403,TRUE,24.2899665828982,-4.23579154263313,"15"
export_JLL PEPT_B3_B03_CD8 _2020-06-16,6124.64,166.887,242.903,119.98,-10.0217,5.50021,43.4417,8461.19,1391.65,19.0743,426.889,TRUE,35.2927900930468,5.62166925042667,"29"
export_JLL PEPT_B3_B03_CD8 _2020-06-16,339.844,30.0463,-211.023,194.034,224.116,175.179,-238.872,23007.9,10329.8,-116.848,708.36,FALSE,21.2328447165321,44.533693079464,"28"
export_JLL PEPT_B3_B03_CD8 _2020-06-16,3247.13,42.4737,30.3788,1889.1,941.039,-2.47966,-101.999,-364.657,577.602,68.9512,131.855,FALSE,5.99107859488061,-15.5337004775478,"9"
export_JLL PEPT_B3_B03_CD8 _2020-06-16,949.003,226.24,852.538,1309.18,1715.02,94.6666,-63.4849,931.731,377.47,2449.36,510.746,FALSE,-13.7934417848215,-8.9684729412615,"15"
export_JLL PEPT_B3_B03_CD8 _2020-06-16,827.886,88.7837,144.788,1856.82,2137.28,161.539,109.205,1127.03,583.884,17.8112,-127.835,TRUE,-36.8920016354958,-6.21637783856241,"5"
export_JLL PEPT_B3_B03_CD8 _2020-06-16,187.402,168.62,304.49,126.41,337.766,109.249,77.3215,11013.3,112.247,-102.373,783.921,FALSE,21.6747337261324,26.6401843670422,"29"
export_JLL PEPT_B3_B03_CD8 _2020-06-16,228.505,254.078,489.74,520.269,1281.19,2637.01,-44.1105,10440,173.05,1368.53,278.036,TRUE,18.910117213326,18.8717641637702,"8"
export_JLL PEPT_B3_B03_CD8 _2020-06-16,-153.686,149.501,377.708,94.5354,-8.79588,214.049,46.7785,15518.1,35.2283,907.38,96.0686,FALSE,26.532218384128,27.1294489446817,"19"
export_JLL PEPT_B3_B03_CD8 _2020-06-16,5511.54,146.378,159.892,2706.23,1828.65,188.012,-3.54208,21.3147,215.737,3241.39,-317.381,FALSE,19.2293166741916,-19.0059734603515,"1"
export_JLL PEPT_B3_B03_CD8 _2020-06-16,92.3712,120.064,-839.775,151.571,151.455,894.099,747.796,16391.7,36563.5,-301.948,1634.73,FALSE,13.6959137315172,42.2111307478004,"28"
export_JLL PEPT_B3_B03_CD8 _2020-06-16,6797.34,169.608,552.156,1001.88,1387.95,178.253,-14.1138,593.748,87.2715,1080.15,434.508,TRUE,27.1064570340153,-16.259982970973,"1"
export_JLL PEPT_B3_B03_CD8 _2020-06-16,5292.94,172.337,174.663,910.628,66.2082,226.551,310.294,10484.2,4047.62,97.1558,70.0299,FALSE,38.4195448771353,11.620734368448,"24"
export_JLL PEPT_B3_B03_CD8 _2020-06-16,1085.14,172.982,785.466,481.405,633.414,47.2847,-34.9399,9817.58,222.397,2058.1,512.767,FALSE,24.4037984094502,16.8180501269474,"29"
export_JLL PEPT_B3_B03_CD8 _2020-06-16,150.191,91.8917,226.425,225.21,547.107,526.458,75.9247,4845.78,914.106,-137.131,-79.2669,TRUE,-8.76052858501845,20.1934548253528,"3"
export_JLL PEPT_B3_B03_CD8 _2020-06-16,-9.97899,139.555,207.335,5750.71,1782.76,177.571,-91.374,3578.83,3666.18,180.809,95.5202,FALSE,-22.2789678921641,7.82590326033668,"28"
export_JLL PEPT_B3_B03_CD8 _2020-06-16,4258.53,173.512,545.49,296.899,216.143,151.18,50.6932,17886.2,248.586,1277.48,283.398,TRUE,38.51071385252,14.7404540493264,"29"
export_JLL PEPT_B3_B03_CD8 _2020-06-16,611.62,118.741,220.869,30.6163,88.2222,44.0181,16.2409,1968.37,959.919,-75.9139,10.1751,TRUE,-25.4554826562105,12.2556209180034,"5"
export_JLL PEPT_B3_B03_CD8 _2020-06-16,267.991,141.155,281.72,314.044,111.338,333.522,176.245,12805.7,951.042,61.8004,180.711,TRUE,19.2419755020179,27.974739070714,"10"
export_JLL PEPT_B3_B03_CD8 _2020-06-16,10550.7,268.661,889.187,2520.28,2424.17,-31.2583,-22.2981,1551.41,384.954,1610.32,487.341,TRUE,42.4402204001271,-11.9197975601149,"1"
export_JLL PEPT_B3_B03_CD8 _2020-06-16,1275.27,160.717,14.9303,388.127,432.252,163.523,60.6278,30851.4,4898.02,-65.1455,63.7165,TRUE,34.4560656494126,34.2280445082184,"28"
export_JLL PEPT_B3_B03_CD8 _2020-06-16,175.867,148.377,-25.8378,217.781,108.075,183.71,67.9321,-766.32,7919.49,-137.35,29.7169,TRUE,-6.98818079479064,40.3013235610046,"27"
export_JLL PEPT_B3_B03_CD8 _2020-06-16,8744.23,40.6409,187.639,2188.44,1629.38,109.255,52.1581,-13.555,-118.857,923.48,221.864,FALSE,40.2189884850833,-13.6741454805271,"1"
export_JLL PEPT_B3_B03_CD8 _2020-06-16,13243.3,124.211,364.667,2964.43,2473.42,63.748,-50.8071,564.722,133.608,1636.73,220.994,FALSE,47.641277152263,-9.01977982225867,"1"
export_JLL PEPT_B3_B03_CD8 _2020-06-16,370.842,190.805,313.67,1083.27,1196.95,160.01,7.55558,11983.5,39.8376,1007.14,75.4549,TRUE,18.4659944755215,26.5546269825765,"8"
export_JLL PEPT_B3_B03_CD8 _2020-06-16,937.822,143.115,188.841,198.912,872.651,1119.57,64.478,4218.87,729.528,224.781,-185.553,TRUE,-5.8100128600229,19.1015926760605,"3"
export_JLL PEPT_B3_B03_CD8 _2020-06-16,6658.56,28.9464,585.465,207.455,142.52,-5.40456,175.98,37325.6,607.853,151.766,119.265,FALSE,40.8715775453612,23.8447552619173,"21"
export_JLL PEPT_B3_B03_CD8 _2020-06-16,199.068,40.0373,248.531,208.4,1335.23,1393.7,-19.5511,13036.1,545.281,391.454,760.524,FALSE,23.4474018846684,25.0347148610285,"8"
export_JLL PEPT_B3_B03_CD8 _2020-06-16,611.442,115.072,273.634,66.1261,78.3061,92.6833,74.5061,1829.29,74.5302,3698.26,-50.2259,FALSE,-18.5275865159768,0.217476432618852,"17"
export_JLL PEPT_B3_B03_CD8 _2020-06-16,496.594,93.4443,221.372,189.257,864.542,1211.84,122.976,11158.9,1105.56,237.293,506.445,TRUE,17.062307667647,23.0349495387834,"8"
export_JLL PEPT_B3_B03_CD8 _2020-06-16,15271.2,376.916,777.155,3253.93,1726.49,509.28,124.716,81.2268,146.589,907.564,201.213,FALSE,47.1742658788546,-3.87863597739314,"1"
export_JLL PEPT_B3_B03_CD8 _2020-06-16,5394.46,23.4616,125.647,1153.91,1568.07,-5.77488,-10.8032,273.005,969.42,127.727,59.839,FALSE,23.5561315297486,-18.7282429176688,"1"
export_JLL PEPT_B3_B03_CD8 _2020-06-16,8200.52,-31.8041,851.972,256.886,187.46,255.254,460.184,27753,1063.85,76.6909,202.081,TRUE,42.2177029765984,10.4272818737058,"21"
export_JLL PEPT_B3_B03_CD8 _2020-06-16,5456.99,78.4061,-780.476,76.4034,288.526,102.95,-146.265,11953.2,20540.9,-172.916,430.026,TRUE,14.2409634489388,48.1396384759487,"28"
export_JLL PEPT_B3_B03_CD8 _2020-06-16,2573.36,844.251,1151.13,3136.35,354.16,499.218,415.513,314.091,1051.45,225.852,315.088,TRUE,-3.43371166758141,-8.95491554493931,"7"
export_JLL PEPT_B3_B03_CD8 _2020-06-16,-34.783,116.114,94.9793,173.221,468.667,609.627,148.113,8832.4,2323.94,-253.631,321.293,TRUE,10.4941380432596,24.3843663518333,"10"
export_JLL PEPT_B3_B03_CD8 _2020-06-16,1285.32,263.875,551.101,137.732,105.705,177.138,40.3947,39982.3,739.945,19.3713,195.672,FALSE,37.5269117520447,33.6678435084693,"19"
export_JLL PEPT_B3_B03_CD8 _2020-06-16,3484.95,15.9836,366.092,163.266,9.90454,83.3513,130.956,24349.3,2101.95,121.367,112.885,FALSE,36.5594167606428,27.6819395051633,"21"
export_JLL PEPT_B3_B03_CD8 _2020-06-16,4456.87,109.153,-7.21315,147.554,151.74,62.8764,-54.466,9471,1291.38,155.667,132.749,TRUE,33.6674166089379,11.9149371940307,"29"
export_JLL PEPT_B3_B03_CD8 _2020-06-16,6209.08,42.7752,224.6,1826.23,1445.84,270.275,104.01,390.797,-62.4732,2195.63,233.266,TRUE,25.7418049784272,-17.2794078521731,"1"
export_JLL PEPT_B3_B03_CD8 _2020-06-16,354.804,67.4449,261.424,348.3,174.133,288.661,25.0753,8669.67,1645.71,550.799,-157.494,TRUE,7.66221043198882,23.3843909692291,"10"
export_JLL PEPT_B3_B03_CD8 _2020-06-16,138.633,183.579,233.869,553.353,151.913,51.0135,89.6382,7633.29,1375.96,406.828,169.142,FALSE,10.2203025650992,21.168071965369,"10"
export_JLL PEPT_B3_B03_CD8 _2020-06-16,251.612,103.861,190.878,111.169,1618.86,30.5012,288.039,4183.92,1178.97,-156.766,447.405,FALSE,-10.4329593927124,14.4239398879346,"4"
export_JLL PEPT_B3_B03_CD8 _2020-06-16,14834,233.788,441.134,7373.03,2993.7,-13.0698,29.2506,701.538,80.4693,1076.21,373.17,FALSE,51.0837414238366,-8.63406685040518,"1"
export_JLL PEPT_B3_B03_CD8 _2020-06-16,154.456,110.211,199.076,195.655,1195.21,204.08,63.0842,3358.32,878.174,225.487,-184.615,TRUE,-16.4655886353918,9.49656206383458,"4"
export_JLL PEPT_B3_B03_CD8 _2020-06-16,10439.2,107.978,239.439,1810.15,1577.94,-63.5634,44.4171,66.3617,-15.3379,895.208,-165.152,FALSE,43.2972438195903,-11.7719325809248,"1"
export_JLL PEPT_B3_B03_CD8 _2020-06-16,15941.1,389.198,562.933,1534.87,1043.29,1412.2,108.59,34521.5,2727.63,439.476,-29.4477,TRUE,43.2984504712163,9.55978790396375,"21"
export_JLL PEPT_B3_B03_CD8 _2020-06-16,-112.346,151.824,480.497,227.061,-139.84,14.1009,56.4479,8080.07,1884.11,83.78,339.154,FALSE,11.8450361384962,23.9184357981065,"10"
export_JLL PEPT_B3_B03_CD8 _2020-06-16,18.3552,90.0773,175.653,252.903,1635.3,481.069,34.3633,16145.6,1360.32,-57.6341,242.3,FALSE,27.651818719038,30.2305351207107,"19"
export_JLL PEPT_B3_B03_CD8 _2020-06-16,424.878,71.3822,275.017,121.432,811.311,1040.66,68.1587,24533.8,606.021,-63.7553,459.898,TRUE,32.1136579717757,32.4190512533834,"19"
export_JLL PEPT_B3_B03_CD8 _2020-06-16,8424.38,93.2826,67.7362,38.0946,178.244,44.1,84.7388,16184,4896.79,100.079,-14.9901,FALSE,43.0679528219406,8.5620429959231,"24"
export_JLL PEPT_B3_B03_CD8 _2020-06-16,-53.0125,129.934,348.291,204.653,1487.58,726.941,46.1572,20534.9,105.169,2634.19,280.587,TRUE,29.1061890489606,30.3804006938363,"19"
export_JLL PEPT_B3_B03_CD8 _2020-06-16,11942.1,132.753,343.6,-39.7386,163.937,89.263,867.992,16200,3085,41.8761,368.674,TRUE,41.943887275502,7.3909971192017,"21"
export_JLL PEPT_B3_B03_CD8 _2020-06-16,3612.37,199.375,-3809.05,204.445,507.582,180.693,-249.36,15095.4,77748.1,-1181.81,-75.1205,FALSE,-9.80153698704364,84.4174908749868,"28"
export_JLL PEPT_B3_B03_CD8 _2020-06-16,2530.42,181.984,241.649,1905.52,3006.65,140.744,59.2767,36.5735,1346.41,-46.5944,31.739,TRUE,-3.85960784177558,-26.5511010777274,"9"
export_JLL PEPT_B3_B03_CD8 _2020-06-16,237.938,194.778,238.251,217.809,-50.7235,91.1091,48.701,-106.922,588.466,42.0657,-12.2155,FALSE,-36.0943417052926,6.6631120473172,"5"
export_JLL PEPT_B3_B03_CD8 _2020-06-16,98.1247,145.966,257.858,87.7098,562.496,1749.46,66.4427,14968.7,846.125,215.783,730.705,TRUE,23.3522099571377,25.5634645833944,"8"
export_JLL PEPT_B3_B03_CD8 _2020-06-16,339.759,607.636,211.014,2636.43,104.562,151.882,363.542,-277.816,7218.46,547.023,119.654,FALSE,-21.8722441821309,27.7819860952082,"27"
export_JLL PEPT_B3_B03_CD8 _2020-06-16,63.0715,179.15,-159.619,1811.37,816.856,200.9,123.792,4559.85,8901.84,-29.3491,178.688,FALSE,5.78438635648221,44.032141299203,"28"
export_JLL PEPT_B3_B03_CD8 _2020-06-16,611.649,225.429,265.626,5024.02,988.927,92.3147,12.5268,1242.24,1090.81,585.267,17.6637,TRUE,-47.8251008169636,-1.4745653981799,"6"
export_JLL PEPT_B3_B03_CD8 _2020-06-16,80.5174,97.5889,236.563,126.677,1818.04,691.234,52.8734,4740.59,269.19,18.1939,944.935,TRUE,-20.0517056047127,24.0073673852602,"3"
export_JLL PEPT_B3_B03_CD8 _2020-06-16,45.5431,31.2872,20.9784,103.792,25.8409,352.775,77.5955,3221.44,1953.15,89.0407,144.671,FALSE,-17.4505157381695,20.2599159619207,"5"
export_JLL PEPT_B3_B03_CD8 _2020-06-16,8262.6,137.608,90.2402,1835.11,1336.39,71.7094,32.5637,88.837,93.851,1137.33,1401.57,TRUE,35.6167641082974,-13.6612731114874,"1"
export_JLL PEPT_B3_B03_CD8 _2020-06-16,130.854,199.686,192.043,151.991,204.194,142.967,4.76314,2374.92,88.2696,4.45672,792.26,TRUE,-22.5503655619637,27.667808318618,"17"
export_JLL PEPT_B3_B03_CD8 _2020-06-16,716.36,1223.53,2185.71,2209.75,821.869,966.04,341.394,1516.91,1633.55,967.624,249.878,TRUE,-50.1011395267125,3.27295600398456,"7"
export_JLL PEPT_B3_B03_CD8 _2020-06-16,284.86,185.897,329.941,943.866,1257.52,1765.49,-40.4522,9540.91,625.911,3342.32,375.487,TRUE,16.9777240130736,20.5338871933091,"8"
export_JLL PEPT_B3_B03_CD8 _2020-06-16,188.311,81.0337,493.102,87.7508,88.9863,120.129,447,23195.9,1224.06,27.2448,156.282,FALSE,32.8354154834108,32.9770095356868,"19"
export_JLL PEPT_B3_B03_CD8 _2020-06-16,88.6645,191.061,118.91,90.0803,1059.17,693.117,33.0241,2679.82,694.246,176.047,219.195,TRUE,-23.4125785913255,18.4376580887717,"3"
export_JLL PEPT_B3_B03_CD8 _2020-06-16,3197.92,3.6591,153.727,1101.53,1666.88,26.9468,-29.7644,3010.23,44.6839,4248.25,3.93904,FALSE,9.93337898846474,-7.53090349447284,"9"
export_JLL PEPT_B3_B03_CD8 _2020-06-16,1144.79,153.531,172.374,60.4414,1057.18,374.97,62.581,6333.78,1113.4,389.355,-101.401,TRUE,3.93600264543099,22.0802908753271,"10"
export_JLL PEPT_B3_B03_CD8 _2020-06-16,335.989,268.58,416.005,407.822,841.58,1287.87,60.6872,8545.68,39.828,893.572,-108.065,TRUE,12.2768368327381,22.352120061157,"8"
export_JLL PEPT_B3_B03_CD8 _2020-06-16,61.4224,88.1344,877.113,-7.33948,2432.15,2447.94,121.589,29781.8,9317.31,-22.6688,320.174,FALSE,30.8775380565655,33.0509050723738,"28"
export_JLL PEPT_B3_B03_CD8 _2020-06-16,290.596,47.5035,18.8547,178.582,-36.0787,64.6223,-44.5338,696.942,4480.01,64.2508,22.547,TRUE,-43.2264098238869,15.6716165061264,"27"
export_JLL PEPT_B3_B03_CD8 _2020-06-16,1127.33,75.5287,164.058,73.4982,52.2163,207.273,4.2464,14413.2,879.166,-6.73953,19.7859,TRUE,22.5689831627553,28.7333857993847,"29"
export_JLL PEPT_B3_B03_CD8 _2020-06-16,1381.4,-10.5415,-17.4123,113.374,23.6936,346.921,513.042,18735.3,4200.52,129.315,276.486,FALSE,25.2240995541487,35.3659288270306,"28"
export_JLL PEPT_B3_B03_CD8 _2020-06-16,13036.4,199.225,499.776,138.029,133.384,19.4839,728.09,34230.4,899.664,-49.8582,233.278,FALSE,44.8093847162219,10.8802631522161,"21"
export_JLL PEPT_B3_B03_CD8 _2020-06-16,10815.3,1.06577,146.683,2211.38,1707.99,-65.8325,5.90475,308.269,44.1676,2110.78,67.3365,FALSE,43.3140548834179,-12.0870570171046,"1"
export_JLL PEPT_B3_B03_CD8 _2020-06-16,1785.14,304.092,140.404,444.781,269.399,113.877,112.974,11327.1,3401.52,41.9621,235.921,FALSE,19.0629300833833,29.671927600875,"24"
export_JLL PEPT_B3_B03_CD8 _2020-06-16,406.177,54.7426,180.408,234.476,-112.347,105.811,99.876,2672.09,1001.05,351.5,-58.4159,FALSE,-20.8570438605951,13.5252440507019,"5"
export_JLL PEPT_B3_B03_CD8 _2020-06-16,13556.8,88.8235,-984.883,269.66,166.01,49.9028,201.211,14463.9,25296.1,25.6507,2.72081,FALSE,11.9501695763779,49.7608288143526,"24"
export_JLL PEPT_B3_B03_CD8 _2020-06-16,4885.13,151.538,260.646,218.791,264.97,61.4668,-42.6075,10603,-0.751024,1227.73,-126.365,FALSE,36.1995798867821,16.7780603959613,"29"
export_JLL PEPT_B3_B03_CD8 _2020-06-16,-27.1128,94.8912,262.483,676.238,791.607,139.051,152.309,287.932,103.069,3491.13,3787.08,FALSE,-22.659790133798,34.196709761845,"22"
export_JLL PEPT_B3_B03_CD8 _2020-06-16,42.2871,147.149,267.847,157.191,184.029,84.4207,179.425,3594.2,17.7301,-328.541,917.464,TRUE,-16.4373431769145,24.6494757302769,"17"
export_JLL PEPT_B3_B03_CD8 _2020-06-16,55.9161,210.328,431.071,402.183,2595.55,1571.36,210.669,4338.37,184.632,5768.83,3910.71,TRUE,-21.9646601967167,42.6420857137747,"3"
export_JOM 036 PEPT_E4_E04_CD8 _2020-06-16,9748.53,153.698,88.1188,1266.04,1770.35,40.1929,61.8641,128.114,669.082,112.431,452.293,FALSE,41.7881709287559,-11.9883142470766,"1"
export_JOM 036 PEPT_E4_E04_CD8 _2020-06-16,321.826,734.075,446.743,1141.56,324.348,273.983,102.505,419.792,2908.03,200.124,469.979,FALSE,-55.7056149905795,9.26242160771326,"7"
export_JOM 036 PEPT_E4_E04_CD8 _2020-06-16,977.754,84.5782,210.892,214.943,228.388,515.107,-5.44193,3563.29,-6.82698,328.608,7029.39,FALSE,-20.3824497805871,43.9721833415566,"25"
export_JOM 036 PEPT_E4_E04_CD8 _2020-06-16,143.229,177.808,177.659,97.349,122.375,646.67,78.3153,4.4222,822.962,102.468,238.397,FALSE,-38.3184693575275,13.9568558794984,"5"
export_JOM 036 PEPT_E4_E04_CD8 _2020-06-16,983.003,31.7576,257.839,87.2138,887.374,-14.3012,-2.9979,22.0773,673.651,354.757,-50.3787,FALSE,-26.1444491482869,-3.9023320780725,"5"
export_JOM 036 PEPT_E4_E04_CD8 _2020-06-16,4273.63,109.559,168.593,111.27,157.443,12.593,21.2,3785.65,694.726,147.871,96.3599,TRUE,29.6274063347294,4.20763967204041,"9"
export_JOM 036 PEPT_E4_E04_CD8 _2020-06-16,96.1429,14.0368,95.2885,165.186,109.135,22.6093,-65.4957,-63.4465,77.8431,1219.21,718.015,FALSE,-16.325476229339,1.87554300170069,"17"
export_JOM 036 PEPT_E4_E04_CD8 _2020-06-16,260.182,-42.4291,85.0499,189.969,162.71,1404.16,40.1862,2384.38,76.6138,919.144,675.926,FALSE,-10.2655400377881,17.466639676453,"3"
export_JOM 036 PEPT_E4_E04_CD8 _2020-06-16,-128.519,75.7208,156.176,265.914,947.358,84.8322,-22.3569,-230.134,125.447,1010.16,508.681,FALSE,-19.5289986394612,-3.77871812610872,"14"
export_JOM 036 PEPT_E4_E04_CD8 _2020-06-16,-31.5371,81.7893,177.307,77.6076,1248.01,604.423,12.9031,1824.04,-33.4107,574.821,5127.9,FALSE,-20.5907932500153,41.4946446906403,"25"
export_JOM 036 PEPT_E4_E04_CD8 _2020-06-16,-126.905,177.704,161.985,193.19,423.794,184.668,95.5374,1318.98,886.062,356.775,463.911,FALSE,-31.4025437441745,9.93428372503714,"5"
export_JOM 036 PEPT_E4_E04_CD8 _2020-06-16,6515.19,-72.8438,87.7082,579.667,1005.17,42.9833,38.4356,-101.224,135.29,63.5153,2129.28,FALSE,28.4426055906941,-12.0825530169474,"1"
export_JOM 036 PEPT_E4_E04_CD8 _2020-06-16,180.249,118.017,151.286,57.3489,-106.754,104.238,15.1888,2079.02,714.451,322.67,-41.383,FALSE,-21.1027466591113,11.8295004635833,"5"
export_JOM 036 PEPT_E4_E04_CD8 _2020-06-16,123.318,850.998,646.486,2511.7,327.578,287.682,483.754,79.1576,1133.58,262.421,423.865,FALSE,-55.7447824489821,3.55103801473141,"7"
export_JOM 036 PEPT_E4_E04_CD8 _2020-06-16,2860.38,371.235,431.907,2476.58,687.812,40.1178,60.9589,85.776,681.435,278.871,61.3527,FALSE,0.576789123442316,-15.4343319908015,"9"
export_JOM 036 PEPT_E4_E04_CD8 _2020-06-16,5368.52,167.908,18.7314,756.671,1201.47,-40.8657,141.932,-122.986,1533.96,87.1147,152.594,FALSE,20.3861306525771,-17.2865245808539,"1"
export_JOM 036 PEPT_E4_E04_CD8 _2020-06-16,1866.56,91.3676,326.841,86.7684,84.4807,48.9118,-25.5283,7760.34,125.527,1658.83,11.094,FALSE,26.0497584184393,10.6856003740617,"2"
export_JOM 036 PEPT_E4_E04_CD8 _2020-06-16,1538.06,-90.6141,192.428,256.196,726.559,154.373,-3.66217,395.054,131.688,1768.34,769.459,FALSE,-10.0481331816581,-4.04519680005612,"17"
export_JOM 036 PEPT_E4_E04_CD8 _2020-06-16,1291.9,712.383,1037.33,4887.9,379.942,357.798,508.052,444.03,1297.83,466.672,239.637,FALSE,-52.1003469882173,-3.94288970359277,"7"
export_JOM 036 PEPT_E4_E04_CD8 _2020-06-16,-491.415,-31.1656,28.819,-791.179,524.572,1941.58,-99.9002,7572.12,1780.74,369.447,4667.06,FALSE,2.45138763334793,29.1462280400822,"3"
export_JOM 036 PEPT_E4_E04_CD8 _2020-06-16,6766.92,148.036,166.732,766.857,1276.13,12.6868,-15.5769,-207.95,-521.157,1279.76,1165.17,FALSE,31.9005420063273,-15.1141931518866,"1"
export_JOM 036 PEPT_E4_E04_CD8 _2020-06-16,-779.965,166.779,137.854,-80.2643,64.3544,134.759,8.86645,4348.9,826.795,134.398,123.614,FALSE,-5.53448255065984,18.3532449752919,"5"
export_JOM 036 PEPT_E4_E04_CD8 _2020-06-16,97.3133,156.164,171.995,-166.778,506.346,615.483,94.7826,781.309,1055.8,221.958,426.675,FALSE,-36.0358813169483,13.6047021952618,"5"
export_JOM 036 PEPT_E4_E04_CD8 _2020-06-16,3876.23,165.196,291.063,2118.24,1849.91,121.759,1.40832,-1183.81,660.635,-2.21773,335.413,FALSE,10.8281296671199,-21.1273251004308,"9"
export_JOM 036 PEPT_E4_E04_CD8 _2020-06-16,1848.75,204.745,-31.2858,40.1949,4483.38,695.272,-1072.24,-646.827,1283.51,197569,-1128.66,FALSE,29.0998897070082,-7.21295674610848,"23"
export_JOM 036 PEPT_E4_E04_CD8 _2020-06-16,-122.816,62.7743,237.689,188.649,-14.9356,45.2319,147.042,4093.39,144.014,524.169,1733.45,FALSE,-14.0331257896332,26.1550941761237,"2"
export_JOM 036 PEPT_E4_E04_CD8 _2020-06-16,9679.73,207.774,410.932,2750.88,2416.57,-16.3514,190.896,-97.2967,5.69747,965.007,662.196,FALSE,42.8475948782416,-13.3221521441519,"1"
export_JOM 036 PEPT_E4_E04_CD8 _2020-06-16,-242.7,48.1784,293.643,119.524,148.513,248.1,-45.1885,-197.431,99.6995,2339.79,3615.97,FALSE,-24.7702841644066,39.1092551687639,"22"
export_JOM 036 PEPT_E4_E04_CD8 _2020-06-16,4651.43,170.642,184.217,1278.51,926.401,32.5505,0.0105416,-580.849,371.683,3066.64,1826.73,FALSE,15.336959403657,-14.4515696133517,"1"
export_JOM 036 PEPT_E4_E04_CD8 _2020-06-16,-73.8717,1578.71,593.684,3185.42,179.422,283.694,292.725,-762.449,2162.72,354.582,468.149,FALSE,-62.3865691290377,4.87212093699289,"7"
export_JOM 036 PEPT_E4_E04_CD8 _2020-06-16,927.219,1052.21,625.699,4206.14,322.896,350.338,337.697,-940.213,4099.59,483.939,264.446,FALSE,-55.6772352894017,10.7671754915816,"7"
export_JOM 036 PEPT_E4_E04_CD8 _2020-06-16,-17.079,214.997,39.2812,891.863,110.598,466.268,8.13249,-865.466,4603.15,192.153,185.626,FALSE,-43.3408177253487,17.4441086872215,"27"
export_JOM 036 PEPT_E4_E04_CD8 _2020-06-16,8014.8,256.563,382.829,2015.88,3319.72,625.348,71.2246,-513.08,384.54,907.093,147.836,FALSE,38.5416480191217,-18.2769039659228,"26"
export_JOM 036 PEPT_E4_E04_CD8 _2020-06-16,1000.44,64.9542,147.75,322.262,110.149,168.76,63.0985,2155.82,401.079,218.652,3312.86,FALSE,-17.4947717801336,36.5149329117378,"25"
export_JOM 036 PEPT_E4_E04_CD8 _2020-06-16,2744.28,222.254,382.202,721.059,56.0135,99.145,21.3992,5744.98,99.8034,1373.04,1061.85,TRUE,23.7275199986415,8.37041845612433,"9"
export_JOM 036 PEPT_E4_E04_CD8 _2020-06-16,6919.51,124.064,183.54,346.425,63.9432,297.826,-1.21261,9843.4,711.124,109.692,193.289,FALSE,38.1948756025103,10.6483445698878,"29"
export_JOM 036 PEPT_E4_E04_CD8 _2020-06-16,1019.1,228.849,226.29,241.908,81.0969,176.971,16.4051,439.642,36.0248,681.145,819.558,FALSE,-21.1245008710341,7.97979528579219,"17"
export_JOM 036 PEPT_E4_E04_CD8 _2020-06-16,42.3205,121.34,25.616,179.9,731.196,936.179,-47.246,5978.73,2332.14,75.7037,126.277,FALSE,6.35993041302824,21.6898194074293,"28"
export_JOM 036 PEPT_E4_E04_CD8 _2020-06-16,2783.74,34.3522,139.665,120.147,438.651,1417.93,52.8016,9910.19,1763.35,-354.533,299.115,FALSE,25.6875035102654,18.9934490228105,"8"
export_JOM 036 PEPT_E4_E04_CD8 _2020-06-16,846.896,69.7563,-366.413,338.678,214.487,3770.09,254.612,4153.15,19307,277.626,14135.3,FALSE,3.70525613197373,52.9130929522512,"28"
export_JOM 036 PEPT_E4_E04_CD8 _2020-06-16,5296.79,147.635,185.681,748.937,1682.53,15.7785,87.7873,231.001,651.9,14.587,146.012,TRUE,21.4518073903583,-16.6796488911767,"1"
export_JOM 036 PEPT_E4_E04_CD8 _2020-06-16,3285.07,52.8628,268.519,104.027,90.5659,62.7855,3.05703,1661.81,61.4944,1664.7,1467.59,FALSE,11.8499998232247,-1.00188750680704,"9"
export_JOM 036 PEPT_E4_E04_CD8 _2020-06-16,1080.36,147.643,224.8,246.045,-104.148,41.4624,-41.1174,3664.87,555.124,328.153,68.836,FALSE,-5.37089017310272,12.281171813883,"5"
export_JOM 036 PEPT_E4_E04_CD8 _2020-06-16,591.198,98.7556,211.136,776.539,1509.47,79.3633,19.2316,945.432,728.564,297.638,79.5814,FALSE,-28.2306620800828,-5.91078406955331,"5"
export_JOM 036 PEPT_E4_E04_CD8 _2020-06-16,602.194,109.219,103.538,206.015,320.045,389.572,43.0667,2612.47,1021.18,426.215,87.6024,FALSE,-22.1213201809331,16.0676848244312,"5"
export_JOM 036 PEPT_E4_E04_CD8 _2020-06-16,287.074,135.476,214.388,877.749,1308.15,126.831,-32.2265,750.609,555.452,332.798,-27.2098,FALSE,-27.202336992389,-4.93312823914478,"5"
export_JOM 036 PEPT_E4_E04_CD8 _2020-06-16,-108.88,205.915,301.601,153.939,269.875,1140.31,0.416171,12396.5,1127.04,12.2098,2183.03,FALSE,20.005184256446,28.8703581183624,"8"
export_JOM 036 PEPT_E4_E04_CD8 _2020-06-16,1994.59,284.762,159.174,91.3359,112.382,111.832,47.9984,864.521,41.4168,910.367,219.403,FALSE,-8.98986615447926,0.943848946948901,"9"
export_JOM 036 PEPT_E4_E04_CD8 _2020-06-16,2296.28,161.85,411.28,897.07,1547.68,258.517,421.949,1786.77,-23.9169,914.643,353.8,FALSE,-6.5144506115633,-12.1198837197883,"9"
export_JOM 036 PEPT_E4_E04_CD8 _2020-06-16,2843.86,131.506,-300.429,241.313,-125.561,302.313,-121.675,8922.78,8163.08,361.919,-82.6566,FALSE,11.8932092617041,43.7078191936096,"24"
export_JOM 036 PEPT_E4_E04_CD8 _2020-06-16,6447.74,101.126,183.333,2268.77,1337.06,-3.25845,-13.812,102.056,177.95,879.88,175.641,FALSE,29.4217091486141,-17.9709036729622,"1"
export_JOM 036 PEPT_E4_E04_CD8 _2020-06-16,222.632,68.8529,195.085,237.876,-18.7037,25.4454,19.6059,703.02,673.409,153.305,80.383,FALSE,-31.6877808859201,8.33882779584954,"5"
export_JOM 036 PEPT_E4_E04_CD8 _2020-06-16,3014.65,185.217,77.1576,132.205,954.377,98.1387,-48.6752,9209.47,1257.97,117.377,2.20444,FALSE,35.4725561556878,12.8112579789731,"10"
export_JOM 036 PEPT_E4_E04_CD8 _2020-06-16,863.015,91.0339,90.3436,128.432,605.041,300.604,62.6032,1508.26,54.5712,1280.65,862.069,FALSE,-22.9806534170118,8.97273102889385,"17"
export_JOM 036 PEPT_E4_E04_CD8 _2020-06-16,18352.8,95.1763,212.117,192.605,216.932,89.3204,13.7,2007.7,123.993,1999.65,1740.1,FALSE,46.3325196179238,-1.32083539571354,"21"
export_JOM 036 PEPT_E4_E04_CD8 _2020-06-16,9933.23,130.994,199.13,1168.54,1533.62,40.8608,61.4159,350.41,20.5298,3542.4,2132.99,FALSE,38.9626220373671,-10.8276923198713,"1"
export_JOM 036 PEPT_E4_E04_CD8 _2020-06-16,5196.79,19.187,275.511,168.298,316.548,5.22074,-124.504,4749.6,24.947,3041.03,1629.73,FALSE,27.8402458503754,1.46387706721499,"9"
export_JOM 036 PEPT_E4_E04_CD8 _2020-06-16,6291.25,91.3064,91.4512,1202.25,1462.46,127.183,-108.287,657.791,54.0057,1700.63,1096.98,FALSE,27.8269164252811,-18.2476244437397,"1"
export_JOM 036 PEPT_E4_E04_CD8 _2020-06-16,9209.61,-10.6977,139.016,1965.49,1484.5,-50.2164,-52.2865,790.304,42.33,943.678,3456.35,FALSE,38.4304472378621,-9.16510926630947,"1"
export_JOM 036 PEPT_E4_E04_CD8 _2020-06-16,451.439,99.2265,157.14,93.9868,120.922,28.0271,-10.3462,170.4,-16.7487,887.021,731.601,FALSE,-17.5214598360324,4.56884575191662,"17"
export_JOM 036 PEPT_E4_E04_CD8 _2020-06-16,222.537,91.0528,48.0006,225.328,195.832,44.9299,64.9625,-424.523,1554.86,-577.278,-160.729,FALSE,-43.8860736321112,8.81906726621474,"5"
export_JOM 036 PEPT_E4_E04_CD8 _2020-06-16,8229.34,159.641,260.661,1286.72,1377.48,55.0496,72.5547,90.1314,-12.4921,2193.51,2078.2,FALSE,36.1884412580832,-12.5370586294814,"1"
export_JOM 036 PEPT_E4_E04_CD8 _2020-06-16,417.383,264.438,218.754,579.221,9.7268,65.1948,65.2631,459.314,1.43091,942.856,391.301,FALSE,-23.4133845049815,4.1963461306632,"17"
export_JOM 036 PEPT_E4_E04_CD8 _2020-06-16,6006.74,85.6915,200.739,2034.27,1869.42,210.248,67.0543,4.31881,-35.913,3321.06,1639.87,FALSE,23.7666285550139,-19.3016681550772,"1"
export_JOM 036 PEPT_E4_E04_CD8 _2020-06-16,2815.3,159.085,441.522,998.154,902.019,307.131,1.29634,5455.49,90.5701,3237.46,2166.27,FALSE,15.7953022426622,6.0023410387516,"9"
export_JOM 036 PEPT_E4_E04_CD8 _2020-06-16,10310.5,25.8471,45.2833,1816.92,1601.7,114.84,-56.9178,-130.323,273.832,549.771,717.632,FALSE,42.4755986062171,-11.1537743986895,"1"
export_JOM 036 PEPT_E4_E04_CD8 _2020-06-16,25.6284,-0.901665,245.469,593.939,1258.67,85.2705,111.125,-200.523,82.8302,967.885,157.987,FALSE,-23.4911196901198,-6.33511063025017,"14"
export_JOM 036 PEPT_E4_E04_CD8 _2020-06-16,7606.1,4.9553,260.665,1432.31,1360.3,83.1912,83.593,-464.121,-8.65441,90.8236,3636.26,FALSE,33.4453293888178,-7.65028255401173,"1"
export_JOM 036 PEPT_E4_E04_CD8 _2020-06-16,165.126,99.7134,246.155,936.509,1872.11,162.617,150.138,902.079,595.505,662.261,87.2224,FALSE,-32.0746059523791,-10.5619387020685,"5"
export_JOM 036 PEPT_E4_E04_CD8 _2020-06-16,-580.708,207.861,557.467,400.471,874.944,452.837,26.8496,8297.17,196.006,908.046,567.128,FALSE,11.815672655852,19.4036823289695,"2"
export_JOM 036 PEPT_E4_E04_CD8 _2020-06-16,988.667,158.45,72.2312,90.4276,1159.8,1674.81,51.9643,15247,1169.71,-29.8235,-34.8048,FALSE,27.9983698281883,25.310512406108,"8"
export_JOM 036 PEPT_E4_E04_CD8 _2020-06-16,510.837,1662.33,1137.63,4748.7,328.039,442.563,500.34,-213.983,723.666,845.128,321.718,FALSE,-50.1495596682758,-2.72693048792109,"7"
export_JOM 036 PEPT_E4_E04_CD8 _2020-06-16,-236.141,101.487,102.771,234.955,-7.58348,911.715,93.6259,4190.31,1324.92,15.1547,221.506,FALSE,-9.08357962984314,19.597736512849,"3"
export_JOM 036 PEPT_E4_E04_CD8 _2020-06-16,5017.46,108.732,202.829,1232.44,1635.33,69.1275,72.1333,-99.3634,144.196,5327.8,5013.46,FALSE,16.2483442603387,-5.8711204270079,"22"
export_JOM 036 PEPT_E4_E04_CD8 _2020-06-16,4821.07,208.903,158.797,293.57,409.704,1771.3,-33.7044,3451.99,861.664,199.891,2526.6,FALSE,20.7044175272879,1.76044926952509,"11"
export_JOM 036 PEPT_E4_E04_CD8 _2020-06-16,93.0392,146.569,152.786,346.298,500.253,990.775,23.2192,134.785,103.146,2839.82,2656.79,FALSE,-24.0343976101615,26.0799731490275,"22"
export_JOM 036 PEPT_E4_E04_CD8 _2020-06-16,10923.5,123.96,438.411,3972.89,1869.29,39.0128,6.08127,135.81,233.601,1460.97,83.6496,FALSE,44.8293591341329,-12.2430390692364,"1"
export_JOM 036 PEPT_E4_E04_CD8 _2020-06-16,379.357,189.456,155.144,168.724,259.145,373.297,217.723,312.315,2238.52,41.4852,268.857,FALSE,-47.5442918145495,12.2690301311261,"5"
export_JOM 036 PEPT_E4_E04_CD8 _2020-06-16,10645.8,77.1432,262.669,1432.06,960.817,87.7233,10.3284,-448.299,96.3125,1362.61,1124.87,FALSE,41.73582222067,-8.71477405741562,"1"
export_JOM 036 PEPT_E4_E04_CD8 _2020-06-16,629.061,83.922,251.76,190.864,251.135,131.318,-36.042,2489.74,733.854,-46.3728,-44.585,TRUE,-25.1281936645566,12.1481242788086,"5"
export_JOM 036 PEPT_E4_E04_CD8 _2020-06-16,-19.0905,92.5418,80.504,313.405,521.772,23.2509,-67.4623,2311.82,2382.38,144.428,107.447,FALSE,-20.5888041297144,15.6972410974361,"5"
export_JOM 036 PEPT_E4_E04_CD8 _2020-06-16,11124.1,49.1999,113.173,1185.75,1321.84,15.7859,120.18,251.796,97.8818,327.188,5580.76,FALSE,39.3049636002581,-1.50798797251073,"21"
export_JOM 036 PEPT_E4_E04_CD8 _2020-06-16,4005.27,124.383,251.081,65.6526,156.421,119.965,63.3281,2480.26,31.3218,1111.29,774.427,FALSE,23.4907082840911,0.0534836455597496,"9"
export_JOM 036 PEPT_E4_E04_CD8 _2020-06-16,9364.92,66.7313,271.982,1721.74,1228.65,-0.999133,-18.351,43.8329,100.269,1119.12,783.153,FALSE,40.6876010565312,-11.8412074884728,"1"
export_JOM 036 PEPT_E4_E04_CD8 _2020-06-16,91.5771,87.4174,202.19,517.464,1566.92,133.624,30.5326,143.581,941.386,371.135,165.904,FALSE,-33.3515841634979,-6.20221518587274,"5"
export_JOM 036 PEPT_E4_E04_CD8 _2020-06-16,1023.56,29.0262,183.924,16.4972,344.665,459.4,61.9268,5300.55,115.23,1121.63,823.796,FALSE,-1.6730495242257,17.7042118831093,"3"
export_JOM 036 PEPT_E4_E04_CD8 _2020-06-16,3766.07,116.133,198.267,177.926,-186.574,-50.3413,-55.9579,10484.2,646.909,405.667,133.728,FALSE,37.2852160089366,13.9961574932258,"29"
export_JOM 036 PEPT_E4_E04_CD8 _2020-06-16,292.596,124.947,116.775,1133.72,852.828,-34.4111,57.0386,-9.16085,780.904,70.9775,161.268,FALSE,-30.987389632672,-1.33310935525091,"5"
export_JOM 036 PEPT_E4_E04_CD8 _2020-06-16,6561.08,65.8775,157.256,2179.59,1640.45,57.3257,-22.6973,207.951,734.409,-166.34,-14.8127,FALSE,31.6283713587753,-17.4914005768824,"1"
export_JOM 036 PEPT_E4_E04_CD8 _2020-06-16,1500.14,336.889,600.262,449.299,332.82,792.045,-32.0748,1907.18,208.341,1114.61,244.688,FALSE,-13.7295925719422,10.4777410394485,"3"
export_JOM 036 PEPT_E4_E04_CD8 _2020-06-16,505.883,176.074,116.471,2538.24,885.04,154.335,98.2492,1687.01,1494.73,-86.7894,153.9,FALSE,-41.9750989828208,3.45730114319607,"5"
export_JOM 036 PEPT_E4_E04_CD8 _2020-06-16,137.019,129.245,179.067,672.013,406.13,79.7964,-2.33199,837.579,572.046,65.8303,199.517,FALSE,-29.4985583647924,4.04237854502621,"5"
export_JOM 036 PEPT_E4_E04_CD8 _2020-06-16,2985.93,-38.6273,274.749,187.553,64.1606,52.084,-37.8094,6770.37,91.5808,1071.27,582.448,FALSE,28.4722110592651,12.109158672393,"9"
export_JOM 036 PEPT_E4_E04_CD8 _2020-06-16,6583.48,86.7139,223.948,1716.08,1650.26,234.182,11.8899,522.022,76.9943,2099.96,1187.99,FALSE,27.9986570208682,-18.5224111656855,"1"
export_JOM 036 PEPT_E4_E04_CD8 _2020-06-16,61.3262,-56.2438,265.086,127.925,138.464,580.243,21.2759,5443.84,19.1592,1701.96,1144.45,FALSE,-2.74731036453975,22.5597071537918,"2"
export_JOM 036 PEPT_E4_E04_CD8 _2020-06-16,745.83,246.546,176.851,788.779,884.016,20.5561,52.7123,4613.49,610.756,217.525,174.506,FALSE,-3.88544724519934,13.6399053754386,"4"
export_JOM 036 PEPT_E4_E04_CD8 _2020-06-16,1156.45,209.969,414.294,29.4536,174.95,492.669,106.225,1630.67,97.5575,1414.34,1293.53,FALSE,-22.9899827728925,17.8116998967517,"3"
export_JOM 036 PEPT_E4_E04_CD8 _2020-06-16,144.014,569.232,707.309,2537.89,388.864,304.692,286.538,155.855,2431.87,324.187,331.105,FALSE,-58.3374140609046,6.39211068204632,"7"
export_JOM 036 PEPT_E4_E04_CD8 _2020-06-16,2108.37,182.622,125.101,-228.595,-146.132,-44.4883,-41.2894,2839.5,-167.991,901.137,16.8206,TRUE,-4.87069795318961,-1.2761086501658,"9"
export_JOM 036 PEPT_E4_E04_CD8 _2020-06-16,5238.65,133.499,114.25,624.849,1636.18,23.6271,53.564,-334.519,-179.793,168.66,2393.03,FALSE,21.7558921926427,-13.4819027442786,"1"
export_JOM 036 PEPT_E4_E04_CD8 _2020-06-16,-587.096,522.104,370.995,463.826,4291.57,4154.12,-42.352,13612.4,-69.9826,891.434,104.285,FALSE,22.8390136748727,17.6984490885997,"19"
export_JOM 036 PEPT_E4_E04_CD8 _2020-06-16,-392.806,351.283,314.884,158.47,326.572,222.698,186.49,2674.33,1020.68,-48.6666,147.221,FALSE,-18.3568491032009,14.2848087315844,"5"
export_JOM 036 PEPT_E4_E04_CD8 _2020-06-16,578.569,98.2789,229.606,576.52,886.445,206.794,108.033,-152.899,216.857,470.349,29246.3,FALSE,-3.81840179173054,61.6479752026937,"20"
export_JOM 036 PEPT_E4_E04_CD8 _2020-06-16,-271.561,250.175,578.105,767.876,1457.77,206.607,-93.6366,-311.986,176.064,1527.02,424.21,FALSE,-20.6923926403702,-9.12567702431634,"14"
export_JOM 036 PEPT_E4_E04_CD8 _2020-06-16,2551.65,85.0906,336.682,302.252,264.943,118.744,-18.9685,10091.1,3.28,742.342,897.794,FALSE,33.8926339728978,13.6668708289379,"29"
export_JOM 036 PEPT_E4_E04_CD8 _2020-06-16,235.123,86.025,153.139,32.7496,50.6838,768.436,40.0135,-594.421,1048.04,45.5593,-54.5708,FALSE,-38.1336428667899,11.7330105601325,"5"
export_JOM 036 PEPT_E4_E04_CD8 _2020-06-16,-142.197,190.425,297.687,206.669,39.364,148.197,-85.8668,424.55,113.549,1280.85,397.643,FALSE,-19.7669785530129,2.06294635694566,"17"
export_JOM 036 PEPT_E4_E04_CD8 _2020-06-16,1603.33,594.57,881.154,2141.93,293.265,426.293,534.247,27.2047,1330.24,340.324,238.166,FALSE,-41.7480692474957,-1.71270042438606,"7"
export_JOM 036 PEPT_E4_E04_CD8 _2020-06-16,143.595,238.701,357.254,1039.18,1376.8,242.373,-119.996,312.676,1102.77,105.073,123.138,FALSE,-34.0881105363977,-5.25659038135258,"5"
export_JOM 036 PEPT_E4_E04_CD8 _2020-06-16,155.067,73.4782,174.276,701.801,1237.46,168.056,27.6837,892.313,681.866,384.265,-118.707,FALSE,-28.3565415239343,-2.29902235276653,"5"
export_JOM 036 PEPT_E4_E04_CD8 _2020-06-16,6241.33,338.67,218.948,1697.02,1639.46,82.3,98.1117,-988.037,3253.42,345.962,274.598,FALSE,28.6058444096535,-17.1883944828682,"1"
export_JOM 036 PEPT_E4_E04_CD8 _2020-06-16,12201,178.51,213.802,3080.98,1826.53,-150.124,-5.17,320.563,379.32,77.6609,725.73,FALSE,46.6405257246414,-8.91996803546366,"1"
export_JOM 036 PEPT_E4_E04_CD8 _2020-06-16,576.214,57.585,178.514,126.669,190.211,747.758,-36.0677,1493.48,741.495,5.33014,-8.22562,FALSE,-24.8125622869845,15.4506861216029,"5"
export_JOM 036 PEPT_E4_E04_CD8 _2020-06-16,-0.822224,144.907,287.952,509.325,929.214,218.239,-49.4428,1299.84,38.7479,1273.15,553.186,FALSE,-18.5025098072136,-1.97597057743341,"14"
export_JOM 036 PEPT_E4_E04_CD8 _2020-06-16,291.945,85.5203,213.336,172.804,838.911,136.997,-41.8748,3289.46,87.3667,1375.42,319.807,FALSE,-12.6738395693179,8.03915428288479,"17"
export_JOM 036 PEPT_E4_E04_CD8 _2020-06-16,26.6926,-3.19132,192.547,139.789,65.0623,180.021,-6.63661,2755.01,79.9212,2024.55,84.8313,FALSE,-17.054194535245,8.59423126722787,"2"
export_JOM 036 PEPT_E4_E04_CD8 _2020-06-16,1089.68,99.3295,228.902,406.406,796.18,760.832,75.6938,2339.88,46.397,957.269,500.76,FALSE,-18.1343051090639,13.168269314864,"3"
export_JOM 036 PEPT_E4_E04_CD8 _2020-06-16,914.957,858.202,1368.98,5097.77,1039.31,1108.49,314.727,1019.21,2127.13,1712.53,1090.53,FALSE,-38.8251829670971,4.59103609378305,"7"
export_JOM 036 PEPT_E4_E04_CD8 _2020-06-16,825.895,108.621,208.283,355.077,245.883,201.712,40.4392,2412.14,14.9826,1087.54,261.856,FALSE,-18.1194315186303,10.0540336468,"17"
export_JOM 036 PEPT_E4_E04_CD8 _2020-06-16,19133.5,166.241,245.607,336.008,64.5192,3.87354,2.91261,1081.13,238.909,1988.59,1328.12,FALSE,46.352628764243,0.352491307420547,"21"
export_JOM 036 PEPT_E4_E04_CD8 _2020-06-16,6524.43,139.203,211.315,66.3958,94.2413,74.3451,120.076,4574.02,40.2803,1672.67,1217.88,FALSE,34.1888953278741,0.729167985824629,"9"
export_JOM 036 PEPT_E4_E04_CD8 _2020-06-16,1712.61,165.531,229.298,28.105,298.293,620.949,31.6691,2230.77,124.589,1520.84,1380.37,FALSE,-12.3689233302733,12.1577157575838,"3"
export_JOM 036 PEPT_E4_E04_CD8 _2020-06-16,6668.1,147.385,165.479,2387.44,1914.75,0.976699,-32.5685,465.234,148.354,1658.74,830.579,TRUE,28.2444870186384,-19.147088279658,"1"
export_JOM 036 PEPT_E4_E04_CD8 _2020-06-16,7380.84,92.5082,220.343,1372.24,1709.02,28.159,-29.7663,527.447,70.5816,1291.31,1045.15,FALSE,34.2123288158401,-16.5155143873503,"1"
export_JOM 036 PEPT_E4_E04_CD8 _2020-06-16,10507.3,9.06196,134.081,1222.74,1596.57,2.02207,-5.99771,287.654,99.7315,685.533,774.035,FALSE,42.3315520982975,-10.4638832085802,"1"
export_JOM 036 PEPT_E4_E04_CD8 _2020-06-16,241.713,99.6402,124.493,35.8818,131.394,527.402,-80.1812,-532.453,879.479,256.117,-109.432,FALSE,-36.9897971770015,7.53952069758741,"5"
export_JOM 036 PEPT_E4_E04_CD8 _2020-06-16,12394.6,536.969,381.915,657.406,383.071,73.8874,45.581,2431.92,1117.5,134.392,490.883,FALSE,43.4094203512744,-6.29517627818958,"21"
export_JOM 036 PEPT_E4_E04_CD8 _2020-06-16,3597.88,128.991,91.5831,1348.98,1004.27,80.8803,-35.5192,604.428,630.593,233.608,163.758,TRUE,11.4614375590578,-18.7555372915121,"9"
export_JOM 036 PEPT_E4_E04_CD8 _2020-06-16,532.456,271.559,659.287,209.47,1254.29,3798.03,-32.5061,7342.08,396.669,451.65,3177.47,FALSE,4.16593255147782,17.5777589581666,"3"
export_JOM 036 PEPT_E4_E04_CD8 _2020-06-16,1271.28,153.746,89.2381,419.465,644.659,610.71,7.31613,-25.5749,939.482,269.122,105.849,FALSE,-31.2470712549528,4.13267609979559,"5"
export_JOM 036 PEPT_E4_E04_CD8 _2020-06-16,161.755,83.8824,16.3308,700.736,994.283,472.878,-34.406,6986.43,2151.42,213.639,75.3273,TRUE,2.73320752545778,25.0995026545752,"28"
export_JOM 036 PEPT_E4_E04_CD8 _2020-06-16,799.49,83.6125,153.992,268.935,816.908,203.088,2.93462,2286.53,564.293,105.899,173.394,FALSE,-18.7698383102755,12.1521799759518,"5"
export_JOM 036 PEPT_E4_E04_CD8 _2020-06-16,1296.76,981.356,1406.35,4229.1,370.812,468.981,50.1919,985.409,2031.2,543.795,368.034,FALSE,-44.1158411332316,1.68102029179641,"7"
export_JOM 036 PEPT_E4_E04_CD8 _2020-06-16,2431.79,37.1731,271.435,108.756,17.3558,331.536,25.6811,4383.92,-61.3279,145.752,824.778,FALSE,18.4807925050065,12.0938697621758,"9"
export_JOM 036 PEPT_E4_E04_CD8 _2020-06-16,540.964,459.378,590.394,315.071,-8.67825,580.671,5206.33,3837.54,925.179,646.746,281.439,FALSE,-2.54534412847595,27.5840172980974,"5"
export_JOM 036 PEPT_E4_E04_CD8 _2020-06-16,36344,7.27506,189.575,1641.89,1398.97,181.74,-68.6545,798.226,123.452,1172.39,59.8261,FALSE,46.046669075161,2.05216293884719,"21"
export_JOM 036 PEPT_E4_E04_CD8 _2020-06-16,729.342,16.1177,35.5722,87.805,220.899,101.025,-64.791,5861.71,3673.97,-144.991,94.7848,FALSE,5.94411237875224,31.9445281990018,"28"
export_JOM 036 PEPT_E4_E04_CD8 _2020-06-16,13822.4,242.345,511.616,3087.15,1902.26,54.9038,17.7934,611.529,215.736,1186.81,420.76,FALSE,47.7058725069225,-6.8611718423925,"1"
export_JOM 036 PEPT_E4_E04_CD8 _2020-06-16,188.019,128.672,115.409,207.722,217.616,1005.71,29.0028,4860.26,1770.93,281.924,739.713,FALSE,0.219770363000441,23.5657045903576,"3"
export_JOM 036 PEPT_E4_E04_CD8 _2020-06-16,11175.9,73.7199,252.344,1653.7,1467.14,-23.4764,7.75002,354.558,58.1107,1010.17,1133.15,FALSE,43.1794183736302,-9.03034410708245,"1"
export_JOM 036 PEPT_E4_E04_CD8 _2020-06-16,100738,86.1824,193.672,1791.03,1887.45,1693.36,106.547,704.784,94.0375,962.415,810.705,FALSE,43.1331248026704,0.744466146322371,"21"
export_JOM 036 PEPT_E4_E04_CD8 _2020-06-16,-281.813,94.9364,274.261,57.6406,420.767,215.065,121.921,8396.06,-12.6048,-271.054,887.161,FALSE,13.1758984352814,22.5440930647437,"2"
export_JOM 036 PEPT_E4_E04_CD8 _2020-06-16,1919.81,38.2231,-47.8664,109.757,160.768,94.6552,83.5136,3836.85,4114.79,169.938,11.2597,FALSE,2.07758877112457,25.5788539810133,"28"
export_JOM 036 PEPT_E4_E04_CD8 _2020-06-16,8221.05,130.317,209.032,1036.25,1019.28,58.413,93.1877,410.983,714.906,-79.595,208.742,FALSE,37.9244600940677,-12.2094928178665,"1"
export_JOM 036 PEPT_E4_E04_CD8 _2020-06-16,527.135,-13.1068,163.984,167.13,504.352,1222.33,29.913,6602.94,782.674,450.182,233.611,FALSE,8.87666597866382,17.4055678284065,"3"
export_JOM 036 PEPT_E4_E04_CD8 _2020-06-16,12247.6,211.658,104.303,293.538,386.779,-60.5229,59.2551,4742.43,562.783,7.82292,-14.8127,FALSE,42.4610648913833,-2.99112287645911,"21"
export_JOM 036 PEPT_E4_E04_CD8 _2020-06-16,783.873,125.943,170.312,586.423,825.869,185.309,-15.5159,360.609,562.683,-41.2255,74.7873,FALSE,-29.9775546421973,-1.21846013968185,"5"
export_JOM 036 PEPT_E4_E04_CD8 _2020-06-16,211.553,47.3288,122.649,94.2127,182.599,757.035,189.817,1659.09,1382.35,111.07,33.0579,FALSE,-31.6492319302923,13.5207090111911,"5"
export_JOM 036 PEPT_E4_E04_CD8 _2020-06-16,376.254,89.7212,229.426,263.909,471.483,151.635,-6.94207,292.425,95.5094,2745,-60.0974,FALSE,-18.3259723064654,-3.11672685097323,"17"
export_JOM 036 PEPT_E4_E04_CD8 _2020-06-16,5135.38,324.722,264.325,3211.22,2452.06,-34.0723,34.8674,186.873,578.155,212.515,376.598,FALSE,23.2669425096957,-27.3848006475793,"1"
export_JOM 036 PEPT_E4_E04_CD8 _2020-06-16,81.7281,147.921,293.405,842.986,2013.3,245.352,63.9284,1885.67,570.725,651.09,153.434,TRUE,-16.1171612299222,4.75378250599493,"4"
export_JOM 036 PEPT_E4_E04_CD8 _2020-06-16,2566.54,1172.54,1348.74,9898.39,450.772,653.683,441.202,370.934,2573.93,468.378,416.848,FALSE,-38.212292110908,-8.08652326737182,"7"
export_JOM 036 PEPT_E4_E04_CD8 _2020-06-16,1009.69,119.639,169.084,303.417,345.534,1344.23,-85.4152,849.403,-31.7682,3101.33,1644.95,TRUE,-26.4504070949251,23.5904192005673,"3"
export_JOM 036 PEPT_E4_E04_CD8 _2020-06-16,6375.72,150.211,166.426,1415.45,1436.35,8.22547,15.9271,4.14695,579.724,539.587,90.0589,TRUE,26.1134187348897,-16.3410918034887,"1"
export_JOM 036 PEPT_E4_E04_CD8 _2020-06-16,46.0081,123.807,274.415,268.071,15.8433,63.5979,117.386,5239.93,1810.84,-80.5758,333.355,FALSE,-2.1679521822261,20.8957548663759,"10"
export_JOM 036 PEPT_E4_E04_CD8 _2020-06-16,253.357,156.019,219.708,199.901,874.913,338.425,-46.8183,2515.67,1020.76,449.831,-137.026,FALSE,-19.2582263132668,12.8338426689884,"4"
export_JOM 036 PEPT_E4_E04_CD8 _2020-06-16,-114.071,77.6517,148.611,247.379,-123.91,1513.46,-45.9122,1260.47,0.102536,2872.9,1954.64,TRUE,-26.3505419834769,23.7210264903473,"3"
export_JOM 036 PEPT_E4_E04_CD8 _2020-06-16,-651.858,106.931,177.383,53.237,617.961,225.755,6.72029,237.159,47.7487,2108.26,1841.79,FALSE,-23.8991690332144,16.7269120566085,"17"
export_JOM 036 PEPT_E4_E04_CD8 _2020-06-16,816.165,109.929,240.861,-102.195,1914.02,291.436,54.9936,2336.11,8.88237,1776.98,1700.4,FALSE,-18.9615511032748,5.29866853153716,"4"
export_JOM 036 PEPT_E4_E04_CD8 _2020-06-16,1837.46,127.122,357.719,13.905,142.341,915.007,5.21203,13509.5,64.3698,2153.95,1530.98,FALSE,31.9776295327364,22.7052966704161,"29"
export_JOM 036 PEPT_E4_E04_CD8 _2020-06-16,1380.33,115.965,272.967,185.427,360.827,540.394,-51.0948,2926.28,168.907,1907.12,1555.49,FALSE,-13.0638367782732,14.0879256146427,"3"
export_JOM 036 PEPT_E4_E04_CD8 _2020-06-16,-50.4968,127.627,141.474,4.99112,264.303,282.466,58.3465,-158,127.003,2025.83,1754.35,FALSE,-25.7916176058458,22.9328416016316,"17"
export_JOM 036 PEPT_E4_E04_CD8 _2020-06-16,98.154,141.845,136.036,482.504,914.845,194.371,-26.1273,58.9866,64.8918,1822.91,1095.1,FALSE,-16.2046631078419,-4.46950849543523,"17"
export_JOM 036 PEPT_E4_E04_CD8 _2020-06-16,10656,182.534,245.064,2663.61,2133.07,19.5717,106.772,552.819,172.156,1140.11,1216.62,TRUE,42.2814237533993,-11.9461844784926,"1"
export_JOM 036 PEPT_E4_E04_CD8 _2020-06-16,1.55956,89.9267,161.313,-4.81117,114.409,81.3167,5.61962,779.075,30.6745,1776.76,491.929,FALSE,-19.6442739017081,2.87915989555174,"17"
export_JOM 036 PEPT_E4_E04_CD8 _2020-06-16,5624.91,125.7,104.032,115.923,337.334,106.729,-63.2939,4119.1,2292.48,1233,655.212,FALSE,32.1292180471527,-0.148789523084261,"9"
export_JOM 036 PEPT_E4_E04_CD8 _2020-06-16,7213.95,113.147,275.366,1889.22,1627.44,40.1492,-75.631,497.59,329.683,1265.5,1065.17,FALSE,32.7620198119053,-17.6576301234235,"1"
export_JOM 036 PEPT_E4_E04_CD8 _2020-06-16,80.8718,84.9989,218.783,307.843,179.437,1495.93,126.737,783.906,-47.1099,189.595,753.621,FALSE,-16.8874985430922,15.1217726041796,"3"
export_JOM 036 PEPT_E4_E04_CD8 _2020-06-16,-163.376,120.709,192.781,173.991,66.4865,55.2067,19.6941,-180.517,110.365,659.305,892.728,FALSE,-23.3061811283667,12.2167497449483,"17"
export_JOM 036 PEPT_E4_E04_CD8 _2020-06-16,2875.82,120.324,296.233,106.825,51.5319,184.995,46.7089,3079.15,612.778,213.31,208.151,FALSE,19.8331179614752,7.11064631844883,"9"
export_JOM 036 PEPT_E4_E04_CD8 _2020-06-16,376.026,129.213,157.743,288.579,587.784,374.318,129.574,2734.4,223.237,-507.497,949.004,FALSE,-19.3098885225403,19.8895802736193,"17"
export_JOM 036 PEPT_E4_E04_CD8 _2020-06-16,525.559,152.744,138.845,251.238,549.439,1035.93,54.2119,-142.132,122.347,353.45,966.334,TRUE,-31.5480136076899,19.1060362322937,"3"
export_JOM 036 PEPT_E4_E04_CD8 _2020-06-16,10872.5,67.3083,233.979,1645.92,1384.67,77.6287,104.341,-152.35,127.423,196.181,2681.6,FALSE,41.4321961557721,-5.9188023249241,"1"
export_JOM 036 PEPT_E4_E04_CD8 _2020-06-16,598.529,230.503,79.789,282.121,-185.795,48.6195,2.04956,3559.16,794.716,165.852,243.407,FALSE,-12.9853012385147,15.0723411384601,"5"
export_JOM 036 PEPT_E4_E04_CD8 _2020-06-16,6.3484,206.829,249.061,266.297,76.1535,84.7605,-2.85663,757.296,351.155,2279.06,3270.82,FALSE,-22.0447126318116,34.5857760359863,"22"
export_JOM 036 PEPT_E4_E04_CD8 _2020-06-16,1793.74,114.627,159.224,394.966,346.369,426.673,57.1375,1829.18,30.8433,898.532,0.534149,FALSE,-10.4291384735948,9.55314135908619,"17"
export_JOM 036 PEPT_E4_E04_CD8 _2020-06-16,268.4,89.5737,184.367,168.197,210.658,137.434,-49.3195,3242.46,157.953,1146.56,107.787,FALSE,-14.0835783208046,11.1131668912035,"2"
export_JOM 036 PEPT_E4_E04_CD8 _2020-06-16,22449.4,718.133,331.464,4152.53,2566.14,-150.227,118.519,-197.249,887.389,347.598,222.611,FALSE,49.5409974706625,-2.70871641803412,"21"
export_JOM 036 PEPT_E4_E04_CD8 _2020-06-16,289.472,161.712,141.147,154.904,457.394,133.127,-39.3627,123.178,1038.68,318.493,-63.0847,FALSE,-34.3786844766601,4.2159369438824,"5"
export_JOM 036 PEPT_E4_E04_CD8 _2020-06-16,2327.34,471.223,1599.93,1011.29,1199.65,139.253,-7.00102,11893.1,464.236,2851.52,1239.53,TRUE,33.2494598472632,17.2170167140243,"29"
export_JOM 036 PEPT_E4_E04_CD8 _2020-06-16,568.356,41.0853,28.0341,91.5844,83.5447,392.832,-98.1479,2218.36,7069.4,804.176,9139.9,FALSE,1.99211689606167,49.4575810318176,"28"
export_JOM 036 PEPT_E4_E04_CD8 _2020-06-16,85.1857,80.674,74.8083,583.315,991.283,71.9795,48.2268,1988.86,740.392,191.619,66.2634,FALSE,-20.4033329038733,6.28574165977193,"5"
export_JOM 036 PEPT_E4_E04_CD8 _2020-06-16,3353.43,61.3117,236.603,1331.25,1692.67,-0.655568,-86.7057,2832.95,628.968,310.967,-38.18,FALSE,17.3080353660714,-8.71152382956092,"4"
export_JOM 036 PEPT_E4_E04_CD8 _2020-06-16,7996.54,32.4094,198.231,956.585,818.328,148.477,-5.76241,7710.46,184.174,2512.23,1940.05,FALSE,36.2299667163134,5.16798654171933,"29"
export_JOM 036 PEPT_E4_E04_CD8 _2020-06-16,159.491,77.5612,44.1255,357.61,588.373,518.484,122.26,1624.55,844.931,-14.4995,-132.455,FALSE,-31.2288216707947,11.2777221766241,"5"
export_JOM 036 PEPT_E4_E04_CD8 _2020-06-16,277.204,174.806,221930,2552.97,-21.154,1323.66,-119.489,-618.411,903.987,198.408,120.894,FALSE,8.34956793678635,6.550200840412,"11"
export_JOM 036 PEPT_E4_E04_CD8 _2020-06-16,166.362,240.75,524.277,681.128,224.654,143.766,157.101,1548.59,191.228,1400.84,1803.15,FALSE,-24.1465816679068,22.7459862094707,"17"
export_JOM 036 PEPT_E4_E04_CD8 _2020-06-16,941.723,107.383,258.049,129.936,188.358,1037.7,48.7138,-126.709,36.0906,923.792,653.059,FALSE,-21.775802843587,15.0076953971629,"3"
export_JOM 036 PEPT_E4_E04_CD8 _2020-06-16,-484.731,54.2197,132.389,306.785,1523.04,1024.88,67.544,6240.74,1172.6,88.7745,312.942,FALSE,3.00855636215765,16.3994052911243,"3"
export_JOM 036 PEPT_E4_E04_CD8 _2020-06-16,1338.43,28.6075,48.341,921.344,963.781,102.353,66.7876,3447.19,1321.67,266.334,247.697,TRUE,-16.4566148276642,16.245450727454,"4"
export_JOM 036 PEPT_E4_E04_CD8 _2020-06-16,130.969,103.382,314.307,216.55,-103.873,312.801,67,8831.69,-7.58459,216.725,2463.95,FALSE,10.7556142017308,29.9691593709587,"25"
export_JOM 036 PEPT_E4_E04_CD8 _2020-06-16,1788.04,27.0018,271.734,759.06,3305.66,-123.844,320.721,897.199,-874.255,90865.7,895.555,TRUE,29.2650833428531,-5.0735148766233,"23"
export_JOM 036 PEPT_E4_E04_CD8 _2020-06-16,144.593,133.097,247.297,201.196,360.294,-25.5171,78.1412,1919.09,613.96,152.362,311.123,FALSE,-21.5571939677556,9.97035395459861,"5"
export_JOM 036 PEPT_E4_E04_CD8 _2020-06-16,127.679,42.7109,218.221,459.183,744.393,82.8847,182.359,86.6881,1384.03,263.006,204.602,FALSE,-45.0595875494678,5.68172111069074,"5"
export_JOM 036 PEPT_E4_E04_CD8 _2020-06-16,11806.1,107.161,93.4137,1063.07,1056.61,28.1567,-0.416143,470.7,904.462,23.2267,113.414,FALSE,43.9221110441712,-7.69002531370022,"1"
export_JOM 036 PEPT_E4_E04_CD8 _2020-06-16,87.645,122.344,106.24,96.4153,480.516,352.409,107.83,789.786,2070.55,-136.323,138.423,FALSE,-43.6199010845372,10.6988706096919,"5"
export_JOM 036 PEPT_E4_E04_CD8 _2020-06-16,170.295,15.5242,213.064,51.5897,342.243,338.178,10.7127,726.374,26.9762,3005.63,1945.02,FALSE,-22.0873573331339,19.028527243089,"22"
export_JOM 036 PEPT_E4_E04_CD8 _2020-06-16,7626.2,107.503,117.823,274.625,2011.82,259.801,12.9821,97.1827,15.1166,3514.83,2574.14,FALSE,32.8808948132387,-14.3815187818126,"1"
export_JOM 036 PEPT_E4_E04_CD8 _2020-06-16,11065.2,225.71,263.009,2593.79,2121.79,3.46905,58.9857,406.892,179.677,882.18,182.7,FALSE,44.7205408305458,-11.3892218380409,"1"
export_JOM 036 PEPT_E4_E04_CD8 _2020-06-16,3803.02,45.4339,124.07,740.554,1806.83,59.3554,-4.423,2209.76,132.929,990.21,1693.19,FALSE,16.4162671893386,-13.6034495435533,"4"
export_JOM 036 PEPT_E4_E04_CD8 _2020-06-16,2138.22,-67.9043,112.39,66.8501,-147.828,11.7196,-98.1642,3116.15,124.195,1238.69,251.618,FALSE,5.81271803192906,8.70473775152319,"9"
export_JOM 036 PEPT_E4_E04_CD8 _2020-06-16,363.185,96.8641,214.118,143.203,58.1621,869.008,54.8424,1042.79,-13.7431,1159.55,542.235,FALSE,-26.2126371896087,16.9255674516684,"3"
export_JOM 036 PEPT_E4_E04_CD8 _2020-06-16,353.806,126.228,34.864,640.935,964.183,1610.04,53.3234,7783.96,1354.28,43.1639,57.0038,FALSE,12.2469731636756,16.9337735202971,"8"
export_JOM 036 PEPT_E4_E04_CD8 _2020-06-16,13.4856,162.183,187.462,229.979,-59.5213,315.122,-55.9705,4760.21,648.498,698.17,501.567,FALSE,-6.66323348429194,18.836879545163,"5"
export_JOM 036 PEPT_E4_E04_CD8 _2020-06-16,2688.63,163.765,310.156,271.111,160.72,1179.94,-14.8058,7939.43,161.869,906.29,576.415,FALSE,26.1196881656892,13.0192256496514,"8"
export_JOM 036 PEPT_E4_E04_CD8 _2020-06-16,10507.2,168.616,222.101,3035.37,2082.75,150.857,17.1316,566.103,196.077,924.789,539.703,FALSE,43.5305828513906,-11.880467942247,"1"
export_JOM 036 PEPT_E4_E04_CD8 _2020-06-16,6363.91,209.756,196.916,911.259,1614.95,-27.5779,32.7043,15.978,3.41582,973.295,213.089,FALSE,30.3445743615245,-17.3192452352377,"1"
export_JOM 036 PEPT_E4_E04_CD8 _2020-06-16,241.441,186.217,228.194,123.375,769.958,566.7,-30.2811,4691.73,41.3073,950.153,359.65,FALSE,-5.03088017416718,18.2045868661799,"3"
export_JOM 036 PEPT_E4_E04_CD8 _2020-06-16,613.731,1258.24,1442.34,5710.73,370.296,487.908,181.353,-99.7989,727.984,1005.58,471.297,FALSE,-42.1174367986539,-7.65399272164211,"7"
export_JOM 036 PEPT_E4_E04_CD8 _2020-06-16,1275.74,117.112,356.917,-172.107,103.176,172.613,88.8034,8169.45,583.51,202.775,274.839,FALSE,21.3747802085437,19.4049468617499,"10"
export_JOM 036 PEPT_E4_E04_CD8 _2020-06-16,4306.18,128.214,147.804,1154.54,888.037,-24.1148,2.23568,148.718,1524.65,-21.3896,144.815,FALSE,13.07165534073,-17.7448844543294,"9"
export_JOM 036 PEPT_E4_E04_CD8 _2020-06-16,173.379,143.524,172.704,876.56,34.3868,205.771,34.5502,1202.46,812.821,35.1999,228.571,FALSE,-34.530967202352,10.5387248897599,"5"
export_JOM 036 PEPT_E4_E04_CD8 _2020-06-16,7989.17,161.293,312.431,304.344,-10.1674,109.988,-9.28028,1659.16,1106.35,244.548,326.141,FALSE,36.1042842408403,-10.5022511624592,"1"
export_JOM 036 PEPT_E4_E04_CD8 _2020-06-16,813.414,126.635,382.028,196.339,117.098,161.35,47.023,7793.31,240.178,3086.45,1352.37,FALSE,12.2550613228636,17.9971659655901,"2"
export_JOM 036 PEPT_E4_E04_CD8 _2020-06-16,272.464,149.779,240.813,187.169,232.11,14.5046,-1.54843,4609.14,83.8506,2267.01,1891.15,FALSE,-5.72709400552271,21.3572964756266,"2"
export_JOM 036 PEPT_E4_E04_CD8 _2020-06-16,-86.713,27.1159,176.547,403.233,359.462,333.271,12.6985,5723.23,106.473,1940.66,1143.04,FALSE,-1.98071212560746,19.2076608366419,"2"
export_JOM 036 PEPT_E4_E04_CD8 _2020-06-16,224.989,123.463,257.705,357.458,2002.39,136.782,-89.3209,61.4217,140.813,2907.96,1395.7,FALSE,-14.3070452834411,-10.0856183342908,"14"
export_JOM 036 PEPT_E4_E04_CD8 _2020-06-16,373.409,15.5684,140.538,39.8486,153.579,690.358,-31.0146,4818.6,-29.9974,907.264,548.666,FALSE,-4.16140743766629,19.144410181026,"3"
export_JOM 036 PEPT_E4_E04_CD8 _2020-06-16,88.144,-65.2943,237.453,99.1328,-89.099,1438.1,82.2137,1083.05,-88.1542,1318.1,324.301,FALSE,-16.2494497174896,14.7920301240094,"3"
export_JOM 036 PEPT_E4_E04_CD8 _2020-06-16,2788.64,-32.775,186.947,87.2144,94.7192,-9.38051,-88.0878,638.211,-54.5106,948.31,623.19,FALSE,5.27111291952378,-2.73446985493997,"9"
export_JOM 036 PEPT_E4_E04_CD8 _2020-06-16,535.269,29.6319,134.97,-48.2874,146.692,143.702,-9.74693,646.006,-81.4926,976.482,712.857,FALSE,-17.9580359279487,8.4003511234423,"17"
export_JOM 036 PEPT_E4_E04_CD8 _2020-06-16,911.824,231.385,284.178,547.434,-131.512,1806.44,-23.1115,999.169,-64.3469,1100.95,610.921,FALSE,-11.1843149642484,14.9166193500386,"3"
export_JOM 036 PEPT_E4_E04_CD8 _2020-06-16,418.156,-78.1699,170.286,169.629,-157.064,113.019,53.1134,1046.82,24.27,919.749,734.163,FALSE,-19.9367393979588,14.98500384267,"17"
export_JOM 036 PEPT_E4_E04_CD8 _2020-06-16,136.816,99.5201,110.312,32.3805,-152.69,327.075,-66.7131,-122.678,-100.095,953.536,626.281,FALSE,-21.2033389848297,11.9616525834454,"17"
export_JOM 036 PEPT_E4_E04_CD8 _2020-06-16,456.918,92.2168,313.59,287.457,1143.6,136.1,60.1084,547.238,129.578,666.062,766.054,FALSE,-25.1632795607648,-3.1118853589429,"17"
export_JOM 036 PEPT_E4_E04_CD8 _2020-06-16,46.2918,53.5247,136.526,24.2816,-69.7658,313.927,319.374,4902.08,-128.819,1182.16,393.123,TRUE,-14.7417928864977,20.202382263828,"5"
export_JOM 036 PEPT_E4_E04_CD8 _2020-06-16,153.894,18.7589,129.196,108.848,380.663,180.814,15.5329,-179.728,348.357,1304.2,1389.65,FALSE,-24.3796867197651,16.814887385713,"17"
export_JOM 036 PEPT_E4_E04_CD8 _2020-06-16,6518.22,-85.6347,87.715,295.469,1947.6,-59.0677,-142.842,-1429.52,-195.551,3257.75,1510.05,FALSE,29.2835403493324,-17.8103551918995,"1"
export_JOM 036 PEPT_E4_E04_CD8 _2020-06-16,-106.816,-166.548,87.9791,83.0591,-44.1566,63.865,-52.8721,785.642,-44.1446,1627.95,920.27,FALSE,-17.9936262111267,9.56903456947276,"17"
export_JOM 036 PEPT_E4_E04_CD8 _2020-06-16,11366.4,-205.158,24.9876,-0.689009,-11.5742,158.995,-76.2042,3987.89,-5.85261,1582.44,889.309,FALSE,43.7589018558967,-3.03373672648719,"21"
export_JOM 036 PEPT_E4_E04_CD8 _2020-06-16,725.156,-197.843,59.1162,-34.3551,360.995,682.807,292.649,13064.5,90.5348,1120.72,1060.85,FALSE,23.0537818412966,29.4541107835517,"29"
export_JOM 036 PEPT_E4_E04_CD8 _2020-06-16,197.31,-160.74,86.8977,247.754,75.3938,243.523,-55.2817,4206.24,-21.0239,1388.96,682.737,FALSE,-8.96474569273836,16.7464384666492,"2"
export_JOM 036 PEPT_E4_E04_CD8 _2020-06-16,290.337,178.099,190.372,166.271,186.445,1066.92,95.1471,5927.17,13.4485,1626.8,883.424,FALSE,5.19951749106575,20.0000426946948,"3"
export_JOM 036 PEPT_E4_E04_CD8 _2020-06-16,-185.416,107.456,121.892,225.392,131.482,187.547,46.8223,361.821,-11.2069,1840.69,1486.57,FALSE,-24.8472712955811,19.2132322217869,"17"
export_JOM 036 PEPT_E4_E04_CD8 _2020-06-16,741.79,26.1682,103.678,-18.9797,977.944,468.156,-6.80728,599.496,72.1985,975.533,778.668,FALSE,-23.4229189190939,4.20414645842785,"3"
export_JOM 036 PEPT_E4_E04_CD8 _2020-06-16,1523.49,133.838,243.656,1206.08,2079.23,221.473,329.496,398.736,37.8876,2047.22,1143.76,FALSE,-12.812270902871,-15.5722117862768,"14"
export_JOM 036 PEPT_E4_E04_CD8 _2020-06-16,397.198,-13.0101,57.1601,514.67,959.24,78.5366,-104.832,1746.85,273.04,1333.95,811.848,FALSE,-17.0391443037217,-0.399994503628538,"17"
export_JOM 036 PEPT_E4_E04_CD8 _2020-06-16,-48.4912,139.549,121.329,77.705,211.628,732.327,71.7385,1338.34,2037.31,346.349,354.49,FALSE,-30.5805439312259,18.9784772761102,"5"
export_JOM 036 PEPT_E4_E04_CD8 _2020-06-16,-59.3069,28.4567,148.468,-14.2326,11.6991,31.6147,50.8333,3547.48,1272.86,205.331,461.744,FALSE,-14.7002892408472,17.5905117174239,"5"
export_JOM 036 PEPT_E4_E04_CD8 _2020-06-16,470.313,431.4,24048.8,1637.41,482.758,1918.57,-84.1182,10210.9,-421.436,3622.76,3215.32,FALSE,3.43223775286886,18.6216538978159,"11"
export_JOM 036 PEPT_E4_E04_CD8 _2020-06-16,-734.801,502.447,-59.9067,-376.434,1309.2,143.849,-105.039,1302.43,1502.87,121.825,235.202,FALSE,-20.2016075407103,7.67618920982441,"5"
export_JOM 036 PEPT_E4_E04_CD8 _2020-06-16,39.5307,320.53,856.637,830.779,892.306,47.446,-61.487,5067.71,-333.309,2743.52,779.007,FALSE,0.226829401225765,6.95066807312548,"2"
export_JOM 036 PEPT_E4_E04_CD8 _2020-06-16,3389.21,461.611,360.008,224.485,263.685,769.626,180.302,227.895,1773.62,1273.17,379.097,FALSE,8.04124314118013,-6.34832661798228,"5"
export_JOM 036 PEPT_E4_E04_CD8 _2020-06-16,-394.049,207.43,157.577,55.3393,1028.22,299.897,78.35,4831.4,846.299,-122.633,95.9664,FALSE,-4.24731254807014,17.848442462844,"3"
export_JOM 036 PEPT_E4_E04_CD8 _2020-06-16,2978.66,200.602,286.814,161.896,364.728,136.228,40.5851,5730.09,81.6075,34.047,896.68,FALSE,26.0040084149261,12.1946690068136,"9"
export_JOM 036 PEPT_E4_E04_CD8 _2020-06-16,-10.2864,248.492,312.441,211.387,330.216,312.502,241.217,6868.71,648.295,259.597,106.102,FALSE,7.17576070696926,18.1965955184566,"10"
export_JOM 036 PEPT_E4_E04_CD8 _2020-06-16,-81.6523,721.025,1404.18,2204.62,453.462,417.807,220.631,-834.05,1717.85,554.531,91.8518,TRUE,-49.0357468232333,2.58000422644041,"7"
export_JOM 036 PEPT_E4_E04_CD8 _2020-06-16,-214.961,179.044,243.126,336.828,750.989,106.529,149.125,246.331,766.822,238.488,-151.439,FALSE,-37.9655893212718,1.83392249578889,"5"
export_JOM 036 PEPT_E4_E04_CD8 _2020-06-16,5263.02,192.92,185.909,599.41,-134.581,58.6315,-4.07191,7451.78,184.815,1139.87,162.988,FALSE,36.4187621890665,12.0932915466754,"29"
export_JOM 036 PEPT_E4_E04_CD8 _2020-06-16,7967.62,132.972,313.785,604.654,204.477,-67.9031,69.4846,8856.16,865.056,557.244,-12.2863,FALSE,38.5248328862348,7.65677598916459,"29"
export_JOM 036 PEPT_E4_E04_CD8 _2020-06-16,110.283,119.34,291.238,576.599,1647.95,40.6797,19.0851,-317.709,909.94,215.194,282.773,FALSE,-30.8678582675453,-7.23406244904221,"5"
export_JOM 036 PEPT_E4_E04_CD8 _2020-06-16,12620.5,240.689,565.961,2612.53,1994.58,112.275,40.8301,467.427,436.866,1177.66,541.564,FALSE,46.1707118879865,-8.46846141751616,"1"
export_JOM 036 PEPT_E4_E04_CD8 _2020-06-16,560.203,104.265,62.7291,427.643,728.194,772.415,-56.4644,158.513,1469.35,119.7,-58.0961,FALSE,-36.9263229037954,9.31363494278049,"5"
export_JOM 036 PEPT_E4_E04_CD8 _2020-06-16,185.252,116.159,90.6693,800.236,1236.09,122.939,6.87425,3479.45,3083.13,15.7848,194.795,TRUE,-2.473033048011,28.6934950804134,"28"
export_JOM 036 PEPT_E4_E04_CD8 _2020-06-16,308.492,212.803,208.713,410.768,-57.948,198.837,25.0658,334.039,1215.91,93.8451,94.0274,FALSE,-41.5229705444045,8.13854255485059,"5"
export_JOM 036 PEPT_E4_E04_CD8 _2020-06-16,422.628,148.784,131.216,840.39,1086.29,93.409,-25.2002,157.491,1158.79,44.1414,62.8687,FALSE,-33.7424733314738,-1.5576584161864,"5"
export_JOM 036 PEPT_E4_E04_CD8 _2020-06-16,1098.91,38.5489,250.455,535.506,692.163,457.296,-76.092,2511.03,138.984,887.111,16.2851,FALSE,-15.9243865154683,11.9125939512235,"17"
export_JOM 036 PEPT_E4_E04_CD8 _2020-06-16,201.288,251.417,346.236,1067.51,1925.6,118.613,31.1933,75.525,132.146,891.179,1797.68,FALSE,-17.747175087376,-8.67725543414186,"14"
export_JOM 036 PEPT_E4_E04_CD8 _2020-06-16,263.791,395.52,771.055,486.762,899.629,1129.62,-39.1664,8778.01,311.622,1086.33,652.099,FALSE,16.2776624578956,19.6186847911713,"8"
export_JOM 036 PEPT_E4_E04_CD8 _2020-06-16,-128.122,133.572,177.585,63.6037,737.436,305.029,140.701,-321.964,692.56,257.822,64.7713,FALSE,-37.1543632863094,3.3655887449023,"5"
export_JOM 036 PEPT_E4_E04_CD8 _2020-06-16,572.46,149.133,347.711,232.366,153.295,73.9841,62.8334,7238.14,-14.736,142.203,1305.38,FALSE,10.0129746543167,23.3353186455303,"2"
export_JOM 036 PEPT_E4_E04_CD8 _2020-06-16,151.127,169.683,193.11,1269.52,905.116,156.042,-34.963,803.881,571.89,52.7026,154.947,FALSE,-28.7534063501954,-1.95677735336682,"5"
export_JOM 036 PEPT_E4_E04_CD8 _2020-06-16,5582.57,18.1583,-17.1891,1075.98,1155.27,3.72138,-168.719,57.4022,3209.08,-267.248,124.141,FALSE,24.0580331409659,-15.9238264940805,"1"
export_JOM 036 PEPT_E4_E04_CD8 _2020-06-16,82.4212,59.6197,270.731,1586.26,1231.08,122.815,40.9366,1850.93,566.384,479.015,2.51538,FALSE,-23.3436966797421,-1.29957434185954,"5"
export_JOM 036 PEPT_E4_E04_CD8 _2020-06-16,12199.4,247.846,475.189,1371.16,1554.42,410.201,60.0338,229.781,1258.52,625.398,243.309,FALSE,43.7160539199016,-7.53082707942984,"1"
export_JOM 036 PEPT_E4_E04_CD8 _2020-06-16,-72.2576,174.317,246.234,195.982,-16.7493,658.546,91.6045,4175.03,5.50547,180.205,1510.57,FALSE,-10.3425355220174,26.064489110576,"3"
export_JOM 036 PEPT_E4_E04_CD8 _2020-06-16,779.517,612.512,467.178,5663.82,315.282,184.039,132.565,723.386,1757.5,229.038,138.721,FALSE,-48.0304271762251,-4.02632022337235,"7"
export_JOM 036 PEPT_E4_E04_CD8 _2020-06-16,8787.95,222.792,204.662,2238.01,2632.38,5.3976,67.2124,780.939,124.273,4356.94,4632.85,TRUE,34.6672981924768,-12.149168064994,"1"
export_JOM 036 PEPT_E4_E04_CD8 _2020-06-16,1175.74,170.177,250.339,175.698,-12.9232,1413.39,28.7737,3735.73,52.678,979.985,70.119,FALSE,-3.07973241254828,17.3425662832995,"3"
export_JOM 036 PEPT_E4_E04_CD8 _2020-06-16,1283.15,124.433,185.436,564.583,1001.63,151.353,91.3845,634.378,71.5995,117.009,1435.88,FALSE,-16.6986845586489,-0.480677700352847,"6"
export_JOM 036 PEPT_E4_E04_CD8 _2020-06-16,307.744,227.808,150.862,245.03,-84.6571,696.552,15.4846,2578.35,48.2435,773.964,793.404,FALSE,-19.5072637085327,20.0709809786219,"3"
export_JOM 036 PEPT_E4_E04_CD8 _2020-06-16,243.621,112.277,106.499,341.93,228.362,-0.234326,-6.04006,1656.22,561.67,234.825,-290.091,FALSE,-19.2023904430029,7.27999057342688,"5"
export_JOM 036 PEPT_E4_E04_CD8 _2020-06-16,68.3223,125.408,180.247,275.248,-185.805,379.505,34.1446,211.687,94.8653,2132.19,1479.47,FALSE,-25.883748122673,21.5679592917242,"17"
export_JOM 036 PEPT_E4_E04_CD8 _2020-06-16,2279.97,292.584,232.524,359.203,387.099,193.64,-36.4761,2973.16,19.8612,3286.12,2766.83,FALSE,0.0108722063808907,7.90147908119713,"9"
export_JOM 036 PEPT_E4_E04_CD8 _2020-06-16,8397.87,185.214,109.961,2290.19,997.769,20.5336,-30.234,190.527,227.999,543.967,1001.08,TRUE,35.9415950068492,-14.1112589849991,"1"
export_JOM 036 PEPT_E4_E04_CD8 _2020-06-16,4530.58,169.006,223,1393.04,1009.53,85.0167,25.6044,-11.9645,130.498,-77.3473,1498.91,FALSE,16.5509417867532,-13.3734891248585,"6"
export_JOM 036 PEPT_E4_E04_CD8 _2020-06-16,1988.8,162.014,173.564,195.85,217.77,171.379,118.707,1489.38,695.825,-123.191,401.154,FALSE,-13.6191754115739,1.77670259593201,"5"
export_JOM 036 PEPT_E4_E04_CD8 _2020-06-16,21311.5,2636.75,391.724,727.089,1571.13,4342.22,177.722,5362.12,2428.6,148.505,687.138,FALSE,48.2525628223279,-5.29165149953729,"21"
export_JOM 036 PEPT_E4_E04_CD8 _2020-06-16,3281.41,166.006,-337.728,106.07,128.305,357.575,-201.603,5211.29,14163,163.538,10032,FALSE,6.73681545550468,52.1355627307177,"20"
export_JOM 036 PEPT_E4_E04_CD8 _2020-06-16,944.435,225.353,289.808,485.382,1289.76,285.213,94.0672,280.386,202.674,1554.23,-2.4799,FALSE,-22.6734950443327,-6.69787612134724,"14"
export_JOM 036 PEPT_E4_E04_CD8 _2020-06-16,3586.28,124.758,147.508,313.011,977.658,599.175,-33.4004,699.545,1045.81,362.308,114.87,FALSE,9.79908338960362,-6.82450162716526,"9"
export_JOM 036 PEPT_E4_E04_CD8 _2020-06-16,343.524,173.281,29.765,309.926,55.8998,115.208,-23.0559,5610.89,2412.3,-75.0984,175.438,FALSE,2.81604339787798,24.782357206536,"28"
export_JOM 036 PEPT_E4_E04_CD8 _2020-06-16,3035.44,987.735,1828.22,8483.59,706.397,440.409,527.755,1036.7,1413.66,461.529,269.92,FALSE,-19.8709590023215,-13.2456694187392,"7"
export_JOM 036 PEPT_E4_E04_CD8 _2020-06-16,1814.08,180.756,476.333,338.335,273.558,-43.7193,-1.75603,3524.95,164.685,2187.48,2605.85,TRUE,-12.0322776229739,33.1695174485059,"9"
export_JOM 036 PEPT_E4_E04_CD8 _2020-06-16,6202.17,153.66,210.653,229.1,-50.7262,975.974,52.707,117.392,65.7714,1266.39,768.792,FALSE,23.3687723652309,-10.2992863918459,"9"
export_JOM 036 PEPT_E4_E04_CD8 _2020-06-16,6554.23,196.276,243.719,2005.35,3100.48,66.1629,100.62,-63.6254,260.01,10372.9,-257.36,FALSE,21.4511720573839,-8.82010024889161,"15"
export_JOM 036 PEPT_E4_E04_CD8 _2020-06-16,2786.12,166.958,132.081,173.895,308.872,147.686,57.5761,4021.99,-25.9569,1047.92,780.167,FALSE,18.650769561876,9.31271630452512,"9"
export_JOM 036 PEPT_E4_E04_CD8 _2020-06-16,4147.43,269.573,581.236,604.796,-83.4673,30.9353,0.599102,5996.21,337.874,1590.37,245.105,FALSE,30.3446855176838,9.38619094243456,"9"
export_JOM 036 PEPT_E4_E04_CD8 _2020-06-16,-52.2475,222.954,-48.9467,117.892,198.543,1547.01,351.074,1497.98,5786.38,271.318,4485.94,FALSE,2.30507155626186,41.4745043599678,"28"
export_JOM 036 PEPT_E4_E04_CD8 _2020-06-16,9986.99,168.416,260.174,5169.56,2734.47,46.6309,63.2848,287.982,12.1392,888.533,417.838,TRUE,41.0886466699164,-13.730019601205,"1"
export_JOM 036 PEPT_E4_E04_CD8 _2020-06-16,101.607,131.453,310.789,336.271,552.282,36.7021,77.7539,-208.474,-15.7452,1290.72,-60.2807,FALSE,-22.7490012945378,-2.4034301591108,"17"
export_JOM 036 PEPT_E4_E04_CD8 _2020-06-16,6617.91,184.582,177.676,6321.05,2359.97,53.8002,-30.4934,239.673,589.205,-113.167,177.4,FALSE,33.1673756926361,-23.4823683781025,"1"
export_JOM 036 PEPT_E4_E04_CD8 _2020-06-16,21194.6,36.7923,85.5723,110.067,581.482,-24.1608,-24.682,20712.2,5188.65,163.318,357.074,FALSE,46.6971240773626,0.578770661884942,"21"
export_JOM 036 PEPT_E4_E04_CD8 _2020-06-16,1270.24,100.726,265.042,229.138,-90.2804,-18.577,20.9858,1458.41,26.142,1502.51,1808.3,FALSE,-8.95570262875705,13.7722556169975,"17"
export_JOM 036 PEPT_E4_E04_CD8 _2020-06-16,3449.15,183.178,255.884,100.166,298.736,155.912,-10.1396,4205.88,1081.47,236.879,204.847,FALSE,25.6635298856337,7.31306970501342,"9"
export_JOM 036 PEPT_E4_E04_CD8 _2020-06-16,114.965,46.1542,140.972,329.693,178.531,136.276,94.0012,10148.9,1381.43,1100.89,728.344,TRUE,16.1643713417267,27.459661261175,"10"
export_JOM 036 PEPT_E4_E04_CD8 _2020-06-16,109.055,297.971,71.3966,273.451,64.9893,26.1266,20.6104,580.98,843.238,136.097,172.037,FALSE,-34.1705689943341,7.58154632463375,"5"
export_JOM 036 PEPT_E4_E04_CD8 _2020-06-16,1038.86,183.352,108.805,1361.81,1144.67,2.72625,-183.029,-0.790533,1082.77,231.368,-194.61,FALSE,-17.2853172547801,-10.6423212282123,"5"
export_JOM 036 PEPT_E4_E04_CD8 _2020-06-16,433.946,143.92,77.3659,473.663,177.848,932.142,46.1082,425.917,1306.44,67.954,409.797,FALSE,-34.6066863888076,14.1004251693727,"5"
export_JOM 036 PEPT_E4_E04_CD8 _2020-06-16,1036.08,245.306,61.9553,168.326,90.5919,184.062,-59.7888,8522.55,1440.37,140.262,26.7971,FALSE,17.9390217422444,23.5516963329804,"10"
export_JOM 036 PEPT_E4_E04_CD8 _2020-06-16,277.601,123.471,38.0844,142.982,668.214,312.016,121.02,546.625,1422.8,277.072,197.983,FALSE,-42.9136720775754,7.5183101215379,"5"
export_JOM 036 PEPT_E4_E04_CD8 _2020-06-16,1259.11,218.136,253.401,1011.13,176.399,147.774,115.171,3862.88,1447.68,57.4021,106.285,FALSE,-10.1242204576493,15.8748540509272,"5"
export_JOM 036 PEPT_E4_E04_CD8 _2020-06-16,218.676,212.726,341.19,301.293,331.355,221.921,30.3461,91.9656,953.39,58.0637,200.786,TRUE,-40.3153858545775,6.33041412872564,"5"
export_JOM 036 PEPT_E4_E04_CD8 _2020-06-16,550.765,81.0693,110.728,210.422,120.933,1310.05,81.7012,2233.43,294.649,323.939,3342.17,FALSE,-25.0380985883042,31.5005219892823,"3"
export_JOM 036 PEPT_E4_E04_CD8 _2020-06-16,9410.53,174.05,153.731,1166.32,1511.28,13.3686,63.7205,555.919,791.642,-32.8674,232.503,FALSE,41.0943534848095,-11.8880301552982,"1"
export_JOM 036 PEPT_E4_E04_CD8 _2020-06-16,1377.54,128.545,273.532,1114.05,1890.45,30.3666,35.0904,2476.78,144.966,883.123,603.634,FALSE,-10.112990127173,-10.6400099214604,"4"
export_JOM 036 PEPT_E4_E04_CD8 _2020-06-16,51.0529,120.299,242.107,341.158,107.698,44.341,-28.1276,4894.25,564.326,135.365,95.2647,FALSE,-2.52620893699756,16.8421508270154,"5"
export_JOM 036 PEPT_E4_E04_CD8 _2020-06-16,13189,142.847,356.957,233.778,74.6291,-11.1941,24.9808,7618.68,20.7826,939.146,321.027,FALSE,41.7476793517632,2.42144438881095,"21"
export_JOM 036 PEPT_E4_E04_CD8 _2020-06-16,13759.6,142.751,143.74,1518.5,1599.84,89.6831,5.65779,5.44928,227.603,1373.39,60.8811,FALSE,47.0719914222265,-6.71557211139091,"1"
export_JOM 036 PEPT_E4_E04_CD8 _2020-06-16,3617.86,201.043,200.463,1388.73,1520.2,117.883,0.873278,944.752,824.631,457.151,-5.00504,FALSE,8.80131792635186,-19.6308846970653,"9"
export_JOM 036 PEPT_E4_E04_CD8 _2020-06-16,869.045,195.038,135.113,172.015,382.132,201.273,-27.7729,1731.43,1173.92,162.686,87.3275,FALSE,-26.9285886554042,11.5935637655747,"5"
export_JOM 036 PEPT_E4_E04_CD8 _2020-06-16,67.0012,12.4081,-247.706,217.462,490.45,246.881,110.246,2046.44,6728.38,-17.7038,60.1381,FALSE,-4.3419242618636,39.0125470521123,"27"
export_JOM 036 PEPT_E4_E04_CD8 _2020-06-16,-107.621,119.224,223.179,145.424,250.267,259.723,139.913,2143.12,1228.26,171.952,1310.67,FALSE,-28.1357145837547,23.6543280757853,"5"
export_JOM 036 PEPT_E4_E04_CD8 _2020-06-16,321.267,97.2492,-9.38163,295.729,431.073,888.883,-85.8383,6905.58,3208.29,13.343,218.249,FALSE,10.1844461047035,27.4382255206621,"28"
export_JOM 036 PEPT_E4_E04_CD8 _2020-06-16,-232.788,188.609,152.328,1086.34,2012.78,358.467,20.9263,4008.36,683.257,150.401,376.383,FALSE,-8.47089497106705,9.93649961704931,"4"
export_JOM 036 PEPT_E4_E04_CD8 _2020-06-16,354.794,149.542,230.584,103.026,1067.3,237.482,-19.3081,111.113,644.101,208.236,-67.682,FALSE,-31.4507016405924,-1.46956386798113,"5"
export_JOM 036 PEPT_E4_E04_CD8 _2020-06-16,11605,233.525,52.3892,1588.06,1275.38,4.9124,186.202,444.19,690.684,215.211,204.495,FALSE,43.8870009447853,-8.01013656145081,"1"
export_JOM 036 PEPT_E4_E04_CD8 _2020-06-16,10757.3,160.862,119.325,1212.88,859.036,-90.5351,102.684,355.28,-49.331,355.475,1499.64,FALSE,42.002486648862,-7.07662685405265,"1"
export_JOM 036 PEPT_E4_E04_CD8 _2020-06-16,735.87,151.35,279.679,127.496,255.762,73.2099,101.475,4163.84,44.1014,-97.965,3476.82,FALSE,-9.97378095431043,34.8203045058579,"25"
export_JOM 036 PEPT_E4_E04_CD8 _2020-06-16,10387.4,172.139,183.763,2512.68,2817.14,516.677,20.542,270.459,226.369,6872.06,4671.99,FALSE,34.4444595564134,-8.99378919785394,"1"
export_JOM 036 PEPT_E4_E04_CD8 _2020-06-16,2523,142.707,341.123,194.252,1479.25,15.6102,26.0199,467.401,139.202,2134.28,2886.82,TRUE,2.88024145206121,-7.6792729379939,"6"
export_JOM 036 PEPT_E4_E04_CD8 _2020-06-16,-206.331,146.102,383.488,223.768,1414.16,2289.18,-11.403,4090.3,1178.91,251.514,2550.2,FALSE,-3.83498557892952,22.0493560150591,"3"
export_JOM 036 PEPT_E4_E04_CD8 _2020-06-16,-53.9249,29.5211,276.208,209.032,288.539,788.721,51.1525,2701.02,1672.35,-92.7404,4000.21,TRUE,-16.8239706131001,40.1854041043515,"25"
export_JOM 036 PEPT_E4_E04_CD8 _2020-06-16,686.013,76.5087,105.8,3142.88,2148.41,185.112,82.0057,404.921,979.34,-84.2457,160.698,FALSE,-21.2418653677196,-19.183161125407,"5"
export_JOM 036 PEPT_E4_E04_CD8 _2020-06-16,117.804,98.0763,133.503,151.891,1211.93,965.226,-64.98,3956.88,1721.59,284.311,628.324,FALSE,-5.34776246920973,19.3782579304661,"3"
export_JOM 036 PEPT_E4_E04_CD8 _2020-06-16,3698.85,58.3372,207.863,1412.53,1692.51,-23.7379,34.8202,-261.197,85.3026,903.501,645.49,FALSE,9.51131073393164,-16.7572863146815,"6"
export_JOM 036 PEPT_E4_E04_CD8 _2020-06-16,9.9257,96.5739,144.514,396.057,388.111,72.2683,-86.8306,403.789,653.299,815.023,81.5854,TRUE,-38.9518427609055,4.55213579390894,"5"
export_JOM 036 PEPT_E4_E04_CD8 _2020-06-16,9253.07,71.415,121.874,2450.24,1786.42,145.749,72.9691,179.311,739.91,356.922,150.592,FALSE,41.1140761227411,-12.857447548025,"1"
export_JOM 036 PEPT_E4_E04_CD8 _2020-06-16,13011.3,124.051,182.004,2155.4,1919.04,-80.6149,131.769,399.206,133.155,367.543,2882.22,FALSE,44.7969530293915,-4.43372978600121,"1"
export_JOM 036 PEPT_E4_E04_CD8 _2020-06-16,74.2389,134.918,261.831,302.021,219.867,150.275,58.7474,311.471,1846.97,414.141,188.346,TRUE,-42.6099425642514,11.3334852741065,"5"
export_JOM 036 PEPT_E4_E04_CD8 _2020-06-16,1439.59,138.461,320.713,400.503,261.168,707.854,0.817449,749.148,158.951,1602.44,130.623,FALSE,-19.8959061794215,7.575096011463,"17"
export_JOM 036 PEPT_E4_E04_CD8 _2020-06-16,2403.37,456.331,584.276,1304.02,2027.44,3023.27,289.439,842.534,616.754,2458.36,856.522,FALSE,4.54036877096772,11.2552735259538,"11"
export_JOM 036 PEPT_E4_E04_CD8 _2020-06-16,2648.1,116.461,108.617,190.43,-64.373,227.733,64.7927,1951.58,611.984,-98.575,145.671,FALSE,8.12437777743685,3.62230781396216,"9"
export_JOM 036 PEPT_E4_E04_CD8 _2020-06-16,36.5225,62.807,118.566,257.615,657.043,65.927,0.596006,610.45,27.3033,164.834,3461.62,FALSE,-18.7914560713402,43.9040395911727,"22"
export_JOM 036 PEPT_E4_E04_CD8 _2020-06-16,6305.97,98.455,138.546,1014.14,932.747,24.2954,133.361,-65.0559,9.5787,704.535,789.896,FALSE,27.2534408553978,-14.2356325645191,"1"
export_JOM 036 PEPT_E4_E04_CD8 _2020-06-16,1168.56,77.9459,245.089,98.7996,32.1682,117.095,-63.1163,9240.33,1161.9,94.9974,-8.66491,FALSE,21.7203754693479,22.2029066123259,"10"
export_JOM 036 PEPT_E4_E04_CD8 _2020-06-16,292.586,135.541,169.693,251.631,348.925,332.118,46.634,6804.08,1454.07,140.281,-5.85336,FALSE,6.35351027656096,21.5189327376065,"10"
export_JOM 036 PEPT_E4_E04_CD8 _2020-06-16,2440.58,106.665,225.785,180.557,10.7117,127.894,18.839,1133.38,-3.45533,587.988,1018.35,FALSE,-2.26419965926798,1.08608965716636,"9"
export_JOM 036 PEPT_E4_E04_CD8 _2020-06-16,26.9338,1204.78,1022.99,1250.01,681.952,403.819,310.466,1245.51,638.547,434.206,235.72,FALSE,-44.653600787418,0.568108527235335,"7"
export_JOM 036 PEPT_E4_E04_CD8 _2020-06-16,2202.47,331.313,396.072,788.935,-21.1587,150.437,285.558,907.891,3317.51,560.956,416.061,FALSE,-27.6410655211002,9.08277535494938,"24"
export_JOM 036 PEPT_E4_E04_CD8 _2020-06-16,1139.22,1279.17,1673.5,9839.13,357.65,402.778,445.915,560.586,719.938,631.656,298.474,FALSE,-47.5084094916243,-14.7054880602004,"7"
export_JOM 036 PEPT_E4_E04_CD8 _2020-06-16,1003.28,166.353,276.476,216.326,1898.61,113.576,-49.0859,255.74,-0.823357,1341.33,1168.34,FALSE,-15.529148198263,-13.486160327523,"14"
export_JOM 036 PEPT_E4_E04_CD8 _2020-06-16,-61.686,131.615,165.451,37.7047,394.018,239.703,-39.4581,1472.9,583.794,-18.5966,81.6489,FALSE,-23.2077543476983,11.8161113475605,"5"
export_JOM 036 PEPT_E4_E04_CD8 _2020-06-16,-102.711,142.081,203.208,4.15121,253.592,543.895,-31.7073,1570.32,1091.06,0.891537,32.855,FALSE,-24.3812717900183,15.1511917098563,"5"
export_JOM 036 PEPT_E4_E04_CD8 _2020-06-16,863.947,44.6371,175.108,151.395,490.007,30.8363,110.628,-222.782,651.465,230.433,-195.738,FALSE,-30.5441036509559,2.30902509512734,"5"
export_JOM 036 PEPT_E4_E04_CD8 _2020-06-16,1478.84,60.2325,230.555,521.279,1494.9,59.805,90.8475,491.438,597.215,276.567,222.942,FALSE,-15.1098341752213,-14.3785821344995,"9"
export_JOM 036 PEPT_E4_E04_CD8 _2020-06-16,586.096,141.483,302.086,414.613,75.4206,249.155,61.3589,4224.38,70.9091,1125.06,1356.28,FALSE,-11.6204045843388,20.3198295251869,"2"
export_JOM 036 PEPT_E4_E04_CD8 _2020-06-16,62.1927,513.536,640.392,146.669,872.727,167.746,-27.339,37547.5,92.0113,507.571,886.989,FALSE,39.1090850612598,34.9292816430654,"19"
export_JOM 036 PEPT_E4_E04_CD8 _2020-06-16,5250.69,109.209,86.8528,2864.41,1309.78,57.6477,-51.8482,-193.044,267.538,878.496,-150.168,FALSE,19.8534663611301,-19.7710971198976,"1"
export_JOM 036 PEPT_E4_E04_CD8 _2020-06-16,109.87,136.069,100.586,90.3825,1041.53,1032.48,69.3573,2547.6,1893.61,98.0402,211.766,FALSE,-12.8791378643623,18.218779954341,"3"
export_JOM 036 PEPT_E4_E04_CD8 _2020-06-16,-154.537,102.267,197.366,408.13,95.1507,132.9,-34.6042,487.337,707.313,-18.0538,78.5848,FALSE,-32.3352971769663,6.75600451665755,"5"
export_JOM 036 PEPT_E4_E04_CD8 _2020-06-16,1290.33,196.848,181.253,830.522,1398.98,-6.03403,80.6256,1382.57,49.1296,896.932,22.7192,FALSE,-9.87636370734282,-8.44897129093625,"14"
export_JOM 036 PEPT_E4_E04_CD8 _2020-06-16,151.167,85.7355,244.139,297.92,1293.93,121.68,140.861,274.003,932.558,167.2,239.828,FALSE,-37.0258889694603,0.291034934924066,"5"
export_JOM 036 PEPT_E4_E04_CD8 _2020-06-16,622.773,35.8425,313.885,326.672,76.063,886.462,61.3188,660.329,78.4748,-97.3865,707.171,FALSE,-24.2690006751361,18.4029366940212,"3"
export_JOM 036 PEPT_E4_E04_CD8 _2020-06-16,83.6596,93.634,230.882,438.871,495.091,165.776,23.4317,189.105,86.0984,484.811,897.502,FALSE,-23.3087789001807,6.06533018007494,"17"
export_JOM 036 PEPT_E4_E04_CD8 _2020-06-16,183.757,81.1321,220.026,248.563,254.968,247.063,50.562,721.066,774.204,206.181,29.1674,FALSE,-34.9744837234893,7.98880145841028,"5"
export_JOM 036 PEPT_E4_E04_CD8 _2020-06-16,1398.57,125.268,185.787,1327.67,946.8,-18.5372,8.86837,-491.319,773.508,207.042,-106.992,FALSE,-12.3164122998724,-11.9372670266858,"9"
export_JOM 036 PEPT_E4_E04_CD8 _2020-06-16,3967.58,244.512,294.345,326.605,1489.59,105.954,95.8915,499.946,605.77,-156.902,233.825,TRUE,12.6312425063022,-19.0495149648336,"9"
export_JOM 036 PEPT_E4_E04_CD8 _2020-06-16,4864.46,169.317,179.528,126.837,505.626,180.352,20.3412,5518.19,592.836,111.406,123.358,FALSE,33.1223157606145,8.8312587515926,"9"
export_JOM 036 PEPT_E4_E04_CD8 _2020-06-16,10267.6,252.767,487.446,1820.26,1475.75,106.817,68.0712,554.409,668.63,361.695,2.40693,FALSE,42.4723043114746,-10.859414630968,"1"
export_JOM 036 PEPT_E4_E04_CD8 _2020-06-16,293.32,157.005,151.332,453.309,907.358,67.7478,64.2269,-274.086,746.876,338.046,138.399,FALSE,-31.4271744071732,-0.716082125938956,"5"
export_JOM 036 PEPT_E4_E04_CD8 _2020-06-16,-107.426,161.686,219.469,185.105,390.04,770.923,224.864,3458.07,26.8862,38.0622,7524.28,FALSE,-15.0510006261342,41.5457673488542,"25"
export_JOM 036 PEPT_E4_E04_CD8 _2020-06-16,2307.05,65.98,190.474,747.912,1274.26,33.8347,213.56,1185.39,572.041,305.504,-70.5358,FALSE,-4.74823769589183,-13.116603845369,"9"
export_JOM 036 PEPT_E4_E04_CD8 _2020-06-16,378.617,83.0104,165.083,211.022,804.588,446.924,14.3672,45.7355,1071.55,40.2745,105.998,FALSE,-38.3146507443932,6.0404127324346,"5"
export_JOM 036 PEPT_E4_E04_CD8 _2020-06-16,1530.72,156.973,185.502,261.528,121.99,1008.6,84.1199,906.398,5.64452,417.966,1758.57,FALSE,-13.4072813084827,16.941361122941,"3"
export_JOM 036 PEPT_E4_E04_CD8 _2020-06-16,105.34,198.806,272.871,236.572,66.1159,115.941,51.9962,-180.544,11.8262,575.76,771.011,FALSE,-25.0945724419198,10.1969224520957,"17"
export_JOM 036 PEPT_E4_E04_CD8 _2020-06-16,17219,191.23,252.664,4043.5,983.761,-97.4628,9.30299,696.596,-23.4142,999.681,192.03,FALSE,47.6680468953731,-2.05026250542631,"1"
export_JOM 036 PEPT_E4_E04_CD8 _2020-06-16,142.5,115.182,221.194,106.957,726.583,577.098,8.79105,279.953,10.8488,1006.31,1140.49,FALSE,-24.9213404754222,16.3202286885667,"3"
export_JOM 036 PEPT_E4_E04_CD8 _2020-06-16,66.8043,182.695,210.774,337.423,613.658,142.477,56.6197,809.846,2.89509,1083.22,840.97,FALSE,-20.6172606641695,2.32211749304225,"17"
export_JOM 036 PEPT_E4_E04_CD8 _2020-06-16,860.314,291.101,21.9361,1416.7,1247.89,161.523,-189.266,1459.58,3310.66,109.124,74.7652,FALSE,-33.4331065377351,10.513340270134,"27"
export_JOM 036 PEPT_E4_E04_CD8 _2020-06-16,423.455,110.462,121.286,146.566,263.533,435.252,-45.7868,-9.60819,907.55,563.014,143.278,FALSE,-36.6825412065202,7.73982170212992,"5"
export_JOM 036 PEPT_E4_E04_CD8 _2020-06-16,1689.47,133.851,612.34,222.506,-7.01376,460.529,-72.464,6385.66,5421.65,733.937,1703.41,FALSE,10.2251645874596,34.7627607569858,"28"
export_JOM 036 PEPT_E4_E04_CD8 _2020-06-16,985.586,72.076,65.5709,217.234,125.841,66.4995,97.3654,731.062,1706.7,441.32,5.63979,FALSE,-40.5361238411926,8.78444237821354,"5"
export_JOM 036 PEPT_E4_E04_CD8 _2020-06-16,630.125,502.927,931.422,4146.25,260.334,512.305,213.158,1348.1,826.295,422.674,387.602,FALSE,-49.6233755827156,2.76402196768312,"7"
export_JOM 036 PEPT_E4_E04_CD8 _2020-06-16,648.09,82.9278,256.636,224.725,-174.663,55.9275,14.2414,9422.04,2337.84,-69.7452,-1.31262,FALSE,15.0004482384037,27.7242714436968,"10"
export_JOM 036 PEPT_E4_E04_CD8 _2020-06-16,928.912,179.928,183.301,535.106,932.815,185.539,-40.3719,2154.96,81.416,259.069,1230.79,FALSE,-16.2236558361381,10.721177700976,"17"
export_JOM 036 PEPT_E4_E04_CD8 _2020-06-16,14516.6,174.19,133.794,1246.08,750.833,-9.43085,-5.86427,403.942,812.388,504.923,234.623,FALSE,45.3696044952587,-4.12955957821216,"1"
export_JOM 036 PEPT_E4_E04_CD8 _2020-06-16,9100.46,175.935,182.17,1495.14,1484.11,52.8181,104.98,566.644,1386.69,258.969,355.137,FALSE,40.2130648667871,-12.2832064804496,"1"
export_JOM 036 PEPT_E4_E04_CD8 _2020-06-16,9768.39,243.146,248.034,3671.73,1538.51,142.995,137.24,225.631,992.939,627.631,272.099,TRUE,40.892947031137,-12.5496588005773,"1"
export_JOM 036 PEPT_E4_E04_CD8 _2020-06-16,-14.0775,65.4478,256.522,1565.32,812.039,61.8816,3.89122,439.518,67.7288,703.315,1422.19,FALSE,-18.1184593455359,-1.68286009768984,"6"
export_JOM 036 PEPT_E4_E04_CD8 _2020-06-16,1060.29,204.806,396.883,356.6,216.82,139.886,6.0357,2836.66,141.656,2694.95,1595.49,FALSE,-11.3932721199034,7.37696276564175,"17"
export_JOM 036 PEPT_E4_E04_CD8 _2020-06-16,1261.12,40.5851,124.888,115.816,867.846,380.941,-149.255,8535.29,78.5628,11473.8,9600.16,FALSE,5.50626873048914,39.9851252921349,"22"
export_JOM 036 PEPT_E4_E04_CD8 _2020-06-16,-132.552,48.651,196.902,91.5297,416.624,104.205,-105.126,1181.69,175.47,3051.27,3321.75,FALSE,-19.9839724359603,31.5091166426644,"22"
export_JOM 036 PEPT_E4_E04_CD8 _2020-06-16,8343.61,204.401,303.941,124.356,276.217,528.277,108.345,7550.19,4416.96,146.303,-34.7611,FALSE,39.6968833890379,6.04213193441593,"24"
export_JOM 036 PEPT_E4_E04_CD8 _2020-06-16,3274.63,102.82,158.425,86.0495,855.844,147.415,-83.0912,4147.18,687.924,340.807,4.42488,FALSE,22.6861920464607,7.34183427982617,"9"
export_JOM 036 PEPT_E4_E04_CD8 _2020-06-16,12351.2,144.383,-72.6773,1614.73,1613.96,-4.85591,86.1171,-104.925,5005.49,61.3451,95.2225,FALSE,40.7948511965113,-6.26172195556049,"1"
export_JOM 036 PEPT_E4_E04_CD8 _2020-06-16,1418.57,52.1068,224.955,132.867,65.6514,85.6043,-10.5052,1235.26,35.4239,-229.221,1006.29,FALSE,-11.9003885026492,11.0086103304698,"17"
export_JOM 036 PEPT_E4_E04_CD8 _2020-06-16,137.032,149.639,500.42,487.375,157.421,155.453,-2.27337,115.483,181.667,880.295,462.233,FALSE,-24.7381202834961,2.09472336336023,"17"
export_JOM 036 PEPT_E4_E04_CD8 _2020-06-16,8323.21,123.017,76.6096,316.482,105.949,130.856,77.8941,4606.48,1338.31,152.273,368.63,TRUE,38.846672641073,-5.72454287755053,"9"
export_JOM 036 PEPT_E4_E04_CD8 _2020-06-16,33.8192,100.872,261.895,383.533,945.515,159.626,59.3948,1403.97,1417.84,-28.952,19.5937,FALSE,-35.352442641824,6.40742413071171,"5"
export_JOM 036 PEPT_E4_E04_CD8 _2020-06-16,2395.68,193.481,170.655,295.727,152.511,93.5014,7.16463,5002.54,41.0533,-14.7042,1765.02,FALSE,19.9856755779526,11.8817147465034,"9"
export_JOM 036 PEPT_E4_E04_CD8 _2020-06-16,11167,115.837,160.168,2636.64,1415.46,48.319,48.4251,322.47,884.403,406.408,220.095,FALSE,43.8966961939536,-9.73789981891699,"1"
export_JOM 036 PEPT_E4_E04_CD8 _2020-06-16,-162.878,96.8504,96.0164,130.268,613.876,264.96,24.5875,1541.12,836.454,481.06,167.747,FALSE,-25.5922061913243,10.7874838713164,"5"
export_JOM 036 PEPT_E4_E04_CD8 _2020-06-16,175.475,124.771,621.153,544.433,775.807,164.238,91.2707,1176.78,-43.6202,3059.69,79.7816,FALSE,-19.4030576561096,-4.88980683405722,"14"
export_JOM 036 PEPT_E4_E04_CD8 _2020-06-16,496.44,365.14,689.674,1214.18,517.239,170.255,86.124,771.657,185.971,1529.06,614.633,FALSE,-25.3901751740319,-1.5423775043507,"17"
export_JOM 036 PEPT_E4_E04_CD8 _2020-06-16,413.744,114.087,319.075,582.113,832.869,68.0573,-64.0302,1260.86,551.848,100.516,296.995,FALSE,-22.4098081686383,1.80139367830726,"5"
export_JOM 036 PEPT_E4_E04_CD8 _2020-06-16,5345.17,489.584,593.001,2378.31,1984.08,474.819,21.412,1793.24,2007.26,4767.32,2552.77,FALSE,20.9556336406543,-12.6488377242439,"15"
export_JOM 036 PEPT_E4_E04_CD8 _2020-06-16,-589.736,9.0276,178.367,430.755,1774.05,281.984,10.914,9178.94,586.865,-428.184,3697.27,FALSE,8.00423384715645,30.1776558394298,"28"
export_JOM 036 PEPT_E4_E04_CD8 _2020-06-16,6447.22,121.676,205.782,1393.65,1760.39,50.9206,56.6094,573.213,635.304,-4.93863,36.6036,FALSE,30.9576231940935,-16.9171816110821,"1"
export_JOM 036 PEPT_E4_E04_CD8 _2020-06-16,534.95,168.864,363.655,577.6,106.442,168.07,-40.6502,-79.4576,47.0827,1154.65,-19.9108,FALSE,-20.2281606636331,-0.149213376320229,"17"
export_JOM 036 PEPT_E4_E04_CD8 _2020-06-16,193.25,1460.14,694.31,3077.21,837.834,801.351,623.594,212.401,5584.82,248.912,104.051,FALSE,-35.6430652523475,16.9657391054072,"7"
export_JOM 036 PEPT_E4_E04_CD8 _2020-06-16,6.66759,113.91,145.379,83.075,1194.8,1881.41,-75.3326,6569.7,989.069,4.78917,178.531,TRUE,-0.62858022627002,18.2625918457578,"3"
export_JOM 036 PEPT_E4_E04_CD8 _2020-06-16,304.924,150.792,171.095,1093.88,1876.85,110.883,81.9019,499.806,110.981,340.349,1150.06,FALSE,-24.6805432843513,-12.3246521854594,"14"
export_JOM 036 PEPT_E4_E04_CD8 _2020-06-16,370.216,39.24,178.644,308.658,-230.374,909.506,-15.4339,4265.93,-32.0971,948.151,94.854,FALSE,-6.43257871804132,16.6871116455069,"3"
export_JOM 036 PEPT_E4_E04_CD8 _2020-06-16,641.166,70.9458,216.911,224.792,52.3231,-18.9275,132.372,161.129,41.6245,1174.27,352.194,FALSE,-24.2221271650115,5.13013757562109,"17"
export_JOM 036 PEPT_E4_E04_CD8 _2020-06-16,170.065,64.624,190.761,636.487,1256.26,38.5515,26.0726,-212.969,593.107,72.0539,243.744,FALSE,-28.2038516834448,-4.34890623317033,"5"
export_JOM 036 PEPT_E4_E04_CD8 _2020-06-16,6758.42,497.048,208.128,558.404,307.151,59.0559,-17.8083,6587.53,1921.42,-45.1505,190.41,FALSE,37.5536904621468,5.46096676400528,"24"
export_JOM 036 PEPT_E4_E04_CD8 _2020-06-16,66.7058,57.8914,69.823,211.471,1435.14,504.275,-127.459,13858.5,1502.87,176.248,-99.7274,FALSE,24.5267421669496,29.3909002925419,"8"
export_JOM 036 PEPT_E4_E04_CD8 _2020-06-16,3422.05,99.707,-49.0423,1606.26,6872.66,-259.615,-70.5268,-473.215,80.445,1256.54,1115.46,FALSE,0.555774348026729,-49.4381218118342,"18"
export_JOM 036 PEPT_E4_E04_CD8 _2020-06-16,8371.2,58.2042,184.06,2707.34,1062.43,72.4902,-179.665,-457.84,195.561,915.669,-105.968,FALSE,37.9772312298935,-16.5905692911377,"1"
export_JOM 036 PEPT_E4_E04_CD8 _2020-06-16,3888.73,130.439,126.022,-5.75104,262.734,65.4694,75.1663,4847.77,-94.9092,3150.73,78.3686,FALSE,23.9371110495188,6.05375304464686,"9"
export_JOM 036 PEPT_E4_E04_CD8 _2020-06-16,209.715,135.156,138.691,248.25,416.124,7.62922,-145.041,918.988,121.154,15019.2,-432.676,FALSE,20.356838493683,-6.11759287677785,"15"
export_JOM 036 PEPT_E4_E04_CD8 _2020-06-16,1328.64,137.448,241.915,317.5,350.408,218.139,-29.0387,2466.53,76.7899,3394.8,2794.29,FALSE,-14.2780264667321,17.5502165021305,"22"
export_JOM 036 PEPT_E4_E04_CD8 _2020-06-16,74.7817,18.0195,92.6664,824.752,758.44,277.472,-3.89862,1569.74,576.786,-7.32815,187.648,FALSE,-24.2264335723566,8.28453604469046,"5"
export_JOM 036 PEPT_E4_E04_CD8 _2020-06-16,512.21,178.289,242.517,492.146,511.586,70.2275,39.8878,-122.764,590.14,-160.807,353.352,FALSE,-31.937771124357,3.97521331556059,"5"
export_JOM 036 PEPT_E4_E04_CD8 _2020-06-16,112.287,87.8434,233.849,682.307,114.722,93.5526,-11.3472,15427.4,748.05,50.8641,356.608,FALSE,25.1444673927057,29.9426534577797,"19"
export_JOM 036 PEPT_E4_E04_CD8 _2020-06-16,17824,134.743,208.078,581.645,784.861,47.9699,26.3771,5599.43,-27.9629,1028.05,103.907,FALSE,44.0813441145736,-1.72881988013823,"21"
export_JOM 036 PEPT_E4_E04_CD8 _2020-06-16,-398.984,90.8769,-23.3623,907.458,1002.7,3.99583,11.8853,-376.065,1017.79,-50.3104,285.548,FALSE,-33.6458703332564,-1.84868030637631,"5"
export_JOM 036 PEPT_E4_E04_CD8 _2020-06-16,19.9702,109.284,122.159,65.431,768.435,701.921,37.6118,2810.48,2396.42,148.86,129.93,FALSE,-14.7070973343557,20.4958510221545,"28"
export_JOM 036 PEPT_E4_E04_CD8 _2020-06-16,24.0288,57.971,100.207,141.654,553.299,329.937,-107.567,-97.1941,1088.77,79.2253,219.464,FALSE,-35.6954726464339,4.44165257307531,"5"
export_JOM 036 PEPT_E4_E04_CD8 _2020-06-16,854.02,137.696,182.613,286.554,-18.7858,238.285,18.9831,365.413,23.4235,1091.85,887.575,FALSE,-21.2503702805595,11.222602185402,"17"
export_JOM 036 PEPT_E4_E04_CD8 _2020-06-16,-46.5742,21.2062,143.502,1058.91,409.201,160.106,-8.68309,6534.25,9.94637,466.206,829.563,FALSE,1.83836733162499,19.3406386900674,"2"
export_JOM 036 PEPT_E4_E04_CD8 _2020-06-16,304.58,273.127,122.026,153.295,341.407,2075.34,-8.83487,9477.9,3182.91,120.866,156.436,FALSE,16.9092906021159,27.5986042352105,"8"
export_JOM 036 PEPT_E4_E04_CD8 _2020-06-16,37.5347,153.816,152.86,246.594,675.591,222.595,7.74921,102.774,715.611,249.634,52.0388,FALSE,-33.4463530348952,2.0426440932306,"5"
export_JOM 036 PEPT_E4_E04_CD8 _2020-06-16,27.9527,145.086,271.783,127.83,72.8317,812.92,-2.74859,9404.17,43.1517,71.1599,721.17,TRUE,11.7935400745077,25.1288885728053,"8"
export_JOM 036 PEPT_E4_E04_CD8 _2020-06-16,2221.38,35.0138,88.9286,210.082,255.441,1082.47,53.0067,165.98,872.556,317.208,352.44,FALSE,-5.47448841142026,4.62235089085978,"3"
export_JOM 036 PEPT_E4_E04_CD8 _2020-06-16,374.597,132.633,55.0558,97.5572,181.884,621.858,-63.513,6044.37,1642.51,-65.467,302.211,FALSE,4.5059803612168,21.5008593464566,"3"
export_JOM 036 PEPT_E4_E04_CD8 _2020-06-16,6738.7,512.708,416.279,4524.33,1826.24,-2.10063,164.703,183.224,2841.87,108.119,163.255,FALSE,31.9930221421505,-19.4733709687417,"1"
export_JOM 036 PEPT_E4_E04_CD8 _2020-06-16,24589.7,135.512,289.129,72.7056,4.48192,456.778,-28.3815,21431.9,631.942,342.724,442.7,FALSE,46.7003915378544,10.1269220604188,"21"
export_JOM 036 PEPT_E4_E04_CD8 _2020-06-16,1041.85,116.849,106.893,390.929,-46.635,829.819,89.5687,913.404,1110,264.238,21.3594,FALSE,-34.8408852162213,14.1023478230811,"5"
export_JOM 036 PEPT_E4_E04_CD8 _2020-06-16,30.2633,220.992,557.768,364.404,433.69,548.765,39.5712,312.798,86.4796,1144.62,485.271,FALSE,-28.843649133998,4.44941876599029,"3"
export_JOM 036 PEPT_E4_E04_CD8 _2020-06-16,90.093,35.3569,202.886,160.499,55.4012,1020.26,-17.1856,6720.59,110.132,1062.25,649.762,TRUE,0.239504885657271,20.7184021061708,"3"
export_JOM 036 PEPT_E4_E04_CD8 _2020-06-16,2100.51,39.7457,10.6074,180.499,900.12,286.647,16.846,5598.53,1364.56,-162.242,-58.4699,FALSE,19.2874667521847,12.5856392965111,"10"
export_JOM 036 PEPT_E4_E04_CD8 _2020-06-16,651.52,165.524,254.391,211.239,784.422,929.067,180.427,192.808,129.991,1923.47,1602,FALSE,-23.4981382796105,15.3355839845586,"3"
export_JOM 036 PEPT_E4_E04_CD8 _2020-06-16,234.18,77.1914,150.844,1276.42,820.435,136.324,-6.53763,-49.4658,1118.55,80.8394,160.847,FALSE,-37.436818950284,-0.794164858659035,"5"
export_JOM 036 PEPT_E4_E04_CD8 _2020-06-16,576.732,132.308,202.636,300.902,62.9142,144.76,38.2512,858.173,653.52,213.484,-50.0069,FALSE,-31.7168954915041,8.5430636963545,"5"
export_JOM 036 PEPT_E4_E04_CD8 _2020-06-16,8783.48,489.013,305.971,965.735,1598.29,86.7592,164.961,928.206,1607.58,195.169,54.2702,FALSE,39.7721916827689,-12.7778578642009,"1"
export_JOM 036 PEPT_E4_E04_CD8 _2020-06-16,259.592,261.856,428.727,496.652,398.794,145.645,30.2799,898.459,1373.75,761.844,374.749,FALSE,-40.468744751106,6.26922395973687,"5"
export_JOM 036 PEPT_E4_E04_CD8 _2020-06-16,714.106,1107.59,702.919,3258.05,182.336,375.138,495.616,468.99,2889.9,354.886,138.997,FALSE,-58.9955390331828,7.34142254434364,"7"
export_JOM 036 PEPT_E4_E04_CD8 _2020-06-16,242.689,66.8163,228.601,281.169,1021.58,278.146,-7.34475,3150.06,1049.89,167.589,-85.2708,FALSE,-15.7056789525556,14.2028924199519,"4"
export_JOM 036 PEPT_E4_E04_CD8 _2020-06-16,530.951,20.1229,131.554,277.792,462.068,92.5331,-131.631,519.403,1540.21,-46.674,198.617,FALSE,-34.6498314478845,7.0020456746898,"5"
export_JOM 036 PEPT_E4_E04_CD8 _2020-06-16,11610.9,276.163,222.814,3094.31,1364.45,-47.707,-1.58061,420.415,1136.78,975.21,-167.654,FALSE,45.4310977847541,-10.4897769897636,"1"
export_JOM 036 PEPT_E4_E04_CD8 _2020-06-16,-268.208,118.505,327.581,1174.54,245.768,1019.01,112.85,10775.3,1468.38,418.991,1437.1,FALSE,14.8997116969527,25.9422151771125,"8"
export_JOM 036 PEPT_E4_E04_CD8 _2020-06-16,274.461,705.918,886.082,6614.78,289.813,508.09,492.172,472.799,2147.65,636.124,129.251,FALSE,-65.7174001930247,-0.27880793779005,"7"
export_JOM 036 PEPT_E4_E04_CD8 _2020-06-16,204.431,159.871,102.987,202.961,335.39,169.845,193.27,-260.503,2716.23,-282.881,212.777,TRUE,-44.2375326390392,13.2309054151499,"5"
export_JOM 036 PEPT_E4_E04_CD8 _2020-06-16,2285.77,-5.57568,78.3537,134.347,57.4384,56.9226,-4.88522,4180.47,1411.3,237.801,25.7378,FALSE,16.8232033975518,10.2987706769383,"5"
export_JOM 036 PEPT_E4_E04_CD8 _2020-06-16,5473.54,39.541,63.0879,300.726,540.812,2.99482,30.8425,251.04,2879.67,66.5247,138.311,FALSE,23.0215429754119,-13.5050502202301,"24"
export_JOM 036 PEPT_E4_E04_CD8 _2020-06-16,12237.1,290.458,208.746,4615.64,1698.13,24.198,-19.489,222.569,575.293,472.197,403.459,FALSE,47.3043750048774,-9.83127527635238,"1"
export_JOM 036 PEPT_E4_E04_CD8 _2020-06-16,243.454,96.8616,204.918,1190.42,808.037,53.1194,-23.3831,190.223,108.988,1282.59,707.38,FALSE,-17.7849573676155,-5.03893348680354,"6"
export_JOM 036 PEPT_E4_E04_CD8 _2020-06-16,12070.1,382.11,147.406,2788.58,217.411,150.13,3.55845,325.034,2925.35,-13.0482,210.567,FALSE,46.138380499216,-6.05224231272065,"1"
export_JOM 036 PEPT_E4_E04_CD8 _2020-06-16,563.025,41.426,221.876,282.123,567.896,90.3452,-18.6975,2466.65,898.728,22.6082,12.4103,FALSE,-18.132011405211,11.9972827667741,"5"
export_JOM 036 PEPT_E4_E04_CD8 _2020-06-16,51.0267,123.54,210.106,594.933,1025.37,189.258,56.5581,259.54,555.979,69.3874,144.794,FALSE,-31.9841346283464,-1.66071042102302,"5"
export_JOM 036 PEPT_E4_E04_CD8 _2020-06-16,9423.44,665.652,235.898,1980.74,491.17,150.8,12.0193,688.167,3056.23,-260.715,234.737,FALSE,42.3411452099594,-10.740705068992,"1"
export_JOM 036 PEPT_E4_E04_CD8 _2020-06-16,127.456,93.8903,218.822,224.247,960.094,398.172,107.497,288.87,564.521,246.142,226.974,FALSE,-33.9482931379888,3.33524617752362,"5"
export_JOM 036 PEPT_E4_E04_CD8 _2020-06-16,9336,36.3321,258.603,2076.4,2020.17,108.917,72.3014,589.683,47.6797,1110.73,606.833,FALSE,40.8754723712744,-12.8467250135261,"1"
export_JOM 036 PEPT_E4_E04_CD8 _2020-06-16,579.773,167.667,134.676,391.675,854.589,177.072,-12.1284,2666.46,114.92,1864.96,-14.6224,FALSE,-15.9886022522932,3.29128233484576,"17"
export_JOM 036 PEPT_E4_E04_CD8 _2020-06-16,500.114,932.369,1267.26,11237.6,622.23,875.939,167.004,1577.52,2844.32,1029.71,614.306,FALSE,-53.7836203062398,-2.49573454545947,"7"
export_JOM 036 PEPT_E4_E04_CD8 _2020-06-16,571.474,974.035,850.54,6674.83,255.161,319.906,401.286,303.117,921.11,168.011,355.608,FALSE,-54.0227442801024,-6.7287291917436,"7"
export_JOM 036 PEPT_E4_E04_CD8 _2020-06-16,12769.6,157.405,615.435,1687.59,2317.21,78.7875,111.78,143.662,973.156,-98.857,335.739,FALSE,45.6015364046998,-7.60522490723399,"1"
export_JOM 036 PEPT_E4_E04_CD8 _2020-06-16,226.682,158.813,134.112,116.708,92.2946,75.6224,20.54,9139.55,567.299,-70.9242,280.935,FALSE,17.4556688985396,23.1725620476244,"10"
export_JOM 036 PEPT_E4_E04_CD8 _2020-06-16,243.709,103.942,457.346,1138.81,1352.19,77.3496,-16.3379,767.695,199.56,1345.23,328.706,FALSE,-23.0464564885253,-8.02681364943457,"14"
export_JOM 036 PEPT_E4_E04_CD8 _2020-06-16,631.44,130.957,547.093,349.476,256.847,339.753,-57.1621,5200.51,222.214,1041.46,427.123,FALSE,-3.20640291439402,17.1986975276565,"2"
export_JOM 036 PEPT_E4_E04_CD8 _2020-06-16,-274.237,162.812,189.613,451.807,3.00133,81.6005,108.885,4246.04,-29.2789,603.372,742.206,TRUE,-14.6498998548244,23.9483529399538,"2"
export_JOM 036 PEPT_E4_E04_CD8 _2020-06-16,-191.015,-36.2597,198.246,247.465,-159.147,-12.7315,39.4423,3107.79,69.1072,1751.18,2302.72,FALSE,-15.1539197597882,27.4983788775437,"17"
export_JOM 036 PEPT_E4_E04_CD8 _2020-06-16,210.823,375.183,266.31,393.805,97.7917,1960.87,155.569,9283.26,587.582,166.372,321.797,FALSE,15.9879159299041,19.681350139864,"8"
export_JOM 036 PEPT_E4_E04_CD8 _2020-06-16,3084.51,5.4587,-278.661,233.108,70.2295,-271.544,-55.3609,978.761,11417.1,-170.264,39859.6,FALSE,-0.0179286693283665,56.762800226363,"20"
export_JOM 036 PEPT_E4_E04_CD8 _2020-06-16,760.492,789.546,1338.06,10878.4,491.866,698.687,360.312,132.792,1074.52,1508.26,951.585,FALSE,-48.922289943417,-14.9990975268455,"7"
export_JOM 036 PEPT_E4_E04_CD8 _2020-06-16,85.7562,80.0498,78.6693,-101.989,577.569,144.563,27.9939,496.757,776.756,-17.9159,137.815,FALSE,-33.226044363169,6.74111227525049,"5"
export_JOM 036 PEPT_E4_E04_CD8 _2020-06-16,238.844,1675.09,1105.83,7387.97,479.499,370.216,615.088,-298.378,6571.88,-18.3319,158.788,FALSE,-54.9669083833065,16.534569278703,"7"
export_JOM 036 PEPT_E4_E04_CD8 _2020-06-16,16259.4,232.77,589.181,1285.16,2121.3,131.701,52.8874,-35.9062,245.517,1807.28,529.115,FALSE,47.7550167979842,-4.13787182283513,"1"
export_JOM 036 PEPT_E4_E04_CD8 _2020-06-16,321.685,63.9402,512.57,732.535,929.479,154.109,116.31,1467.21,1287.34,-40.413,296.256,FALSE,-39.9292644832437,6.54119435720319,"5"
export_JOM 036 PEPT_E4_E04_CD8 _2020-06-16,16348,253.653,215.58,2036.04,1468.82,-61.7924,-9.66187,0.370711,308.283,898.925,-77.5026,FALSE,47.8785325961944,-3.85410231404909,"1"
export_JOM 036 PEPT_E4_E04_CD8 _2020-06-16,9368.53,136.763,236.008,3285.59,2064.02,22.3451,22.3634,-341.722,655.402,236.638,-171.678,TRUE,40.3631524542559,-12.8001183916519,"1"
export_JOM 036 PEPT_E4_E04_CD8 _2020-06-16,7183.89,118.564,56.7662,2339.19,1839.26,29.2543,143.243,1080.51,575.076,103.109,178.676,FALSE,33.9231453144309,-16.4832235402792,"1"
export_JOM 036 PEPT_E4_E04_CD8 _2020-06-16,279.122,112.38,51.6685,255.175,913.054,116.762,15.3093,583.698,590.868,41.6885,67.4167,FALSE,-28.2087323885437,0.912478570162145,"5"
export_JOM 036 PEPT_E4_E04_CD8 _2020-06-16,1015.04,130.388,96.3877,345.171,144.257,73.4623,22.17,6239.83,696.122,123.387,203.452,FALSE,10.6808642502748,16.8842975375876,"10"
export_JOM 036 PEPT_E4_E04_CD8 _2020-06-16,4746,43.5226,64.6585,1565.71,1047.6,-17.4536,196.456,1040.43,152.22,2455.78,-185.193,FALSE,15.9949251179362,-15.7214586879071,"6"
export_JOM 036 PEPT_E4_E04_CD8 _2020-06-16,14035.1,290.259,927.417,3461.94,3021.34,-72.3018,1.20945,828.237,293.25,1965.04,688.097,FALSE,48.4533894367946,-9.22025659124453,"1"
export_JOM 036 PEPT_E4_E04_CD8 _2020-06-16,624.735,100.444,194.248,192.309,-44.6467,850.443,-9.49204,409.884,105.835,910.906,146.302,FALSE,-26.0484057092607,14.7159214480526,"3"
export_JOM 036 PEPT_E4_E04_CD8 _2020-06-16,454.927,57.9914,71.9857,56.4228,-16.2517,103.484,52.0485,1543.32,1656.84,238.348,150.297,FALSE,-33.9857250329607,11.6556218253985,"5"
export_JOM 036 PEPT_E4_E04_CD8 _2020-06-16,123.41,189.554,478.785,69.0269,228.362,241.71,46.0498,1458.27,1743.83,692.776,-4.91168,FALSE,-34.3664041258536,8.97466440404888,"5"
export_JOM 036 PEPT_E4_E04_CD8 _2020-06-16,1491,51.8858,181.569,92.845,48.3447,105.579,-23.1508,6872.65,68.3353,1790.43,3.58596,FALSE,18.2627373529219,10.7617034231723,"2"
export_JOM 036 PEPT_E4_E04_CD8 _2020-06-16,741.465,165.673,252.253,489.638,862.23,64.9489,39.8671,1256.64,924.865,1.67634,-52.0994,FALSE,-28.446929909147,3.86721647227484,"5"
export_JOM 036 PEPT_E4_E04_CD8 _2020-06-16,232.168,35.7833,128.928,175.067,737.837,336.374,7.01133,466.551,1848.66,101.87,117.719,TRUE,-42.4632671965306,11.8441728035633,"5"
export_JOM 036 PEPT_E4_E04_CD8 _2020-06-16,2635.36,83.5847,216.496,331.202,165.33,79.5657,37.3561,4637.32,563.133,145.043,289.274,FALSE,21.741584263037,11.1334641338911,"5"
export_JOM 036 PEPT_E4_E04_CD8 _2020-06-16,13989.1,88.0093,4.55675,2020.61,3121.05,-19.0937,125.134,279.526,196.952,4941.99,4489.09,FALSE,41.79517512757,-3.55647649919096,"1"
export_JOM 036 PEPT_E4_E04_CD8 _2020-06-16,1189.38,113.889,194.779,161.4,379.776,38.6139,39.5361,1328.88,869.277,90.1014,-194.982,FALSE,-24.4978145440107,6.94330577436334,"5"
export_JOM 036 PEPT_E4_E04_CD8 _2020-06-16,-29.464,183.788,230.798,143.701,592.172,820.804,113.411,5061.27,770.567,512.917,193.985,FALSE,-3.05253533981903,17.4027956456718,"3"
export_JOM 036 PEPT_E4_E04_CD8 _2020-06-16,1602.59,91.8033,202.174,145.352,-62.0742,1228.46,49.9368,1234.32,890.099,243.111,116.061,FALSE,-17.169283033909,15.8205606019731,"3"
export_JOM 036 PEPT_E4_E04_CD8 _2020-06-16,6014.78,65.6077,-985.616,-4.74722,343.543,60.3093,631.959,-469.306,28718.5,-463.72,12949.8,FALSE,7.04251461730841,63.9678113212478,"28"
export_JOM 036 PEPT_E4_E04_CD8 _2020-06-16,563.233,91.972,178.935,102.762,291.857,37.9087,-9.34136,2569.47,131.374,-171.603,3621.23,TRUE,-17.7480312558759,39.885613332786,"25"
export_JOM 036 PEPT_E4_E04_CD8 _2020-06-16,621.815,286.085,208.091,542.897,1518.04,102.147,89.1309,6700.72,37.0945,43.0135,1857.95,FALSE,6.22898164983235,21.5134247487551,"8"
export_JOM 036 PEPT_E4_E04_CD8 _2020-06-16,-47.7461,101.558,186.037,130.243,12.8944,195.538,65.1911,4292.05,767.293,287.449,148.288,FALSE,-8.92792045975996,16.668742255292,"5"
export_JOM 036 PEPT_E4_E04_CD8 _2020-06-16,1516.94,68.2742,62.9252,239.685,166.367,129.614,70.2725,3164.71,707.659,94.1616,-16.0342,FALSE,-5.06667936649126,13.0155142070925,"5"
export_JOM 036 PEPT_E4_E04_CD8 _2020-06-16,398.112,85.4937,230.178,676.694,929.878,98.2635,-42.6709,-27.516,92.3838,1178.43,1549.5,FALSE,-13.6306233290029,-1.58570785823055,"17"
export_JOM 036 PEPT_E4_E04_CD8 _2020-06-16,210.084,76.7938,190.54,434.329,1077.02,119.857,123.527,287.963,1134.52,255.417,-5.00293,FALSE,-38.5376317588513,2.10176479150965,"5"
export_JOM 036 PEPT_E4_E04_CD8 _2020-06-16,-148.176,99.5955,245.55,380.495,1082.74,1359.71,-84.157,2253.64,252.643,2032.96,4381.55,FALSE,-20.1952879182513,33.5215513300048,"25"
export_JOM 036 PEPT_E4_E04_CD8 _2020-06-16,3751.3,76.6945,212.141,1465.82,1841.88,57.8196,27.4721,118.887,165.474,923.638,678.841,FALSE,9.5793950633619,-18.8346206315277,"6"
export_JOM 036 PEPT_E4_E04_CD8 _2020-06-16,5725.38,85.8579,128.424,1695.64,2749.55,-24.6624,-308.265,476.52,477.329,17148.9,14536.1,FALSE,5.38383803674373,28.8760572673018,"22"
export_JOM 036 PEPT_E4_E04_CD8 _2020-06-16,940.14,123.68,134.673,518.964,1045.12,195.166,149.198,1238.53,929.843,172.089,151.568,FALSE,-35.5749891580622,5.07410257538185,"5"
export_JOM 036 PEPT_E4_E04_CD8 _2020-06-16,852.965,923.868,466.719,5317.64,130.095,196.924,281.3,-191.59,6158.39,262.518,144.832,FALSE,-44.2726671378018,20.1643190449819,"7"
export_JOM 036 PEPT_E4_E04_CD8 _2020-06-16,1031.41,134.544,-50.114,1366.5,1513.32,27.658,-142.986,999.878,3962.61,64.304,-82.2133,FALSE,-35.2113451678898,9.50433982404401,"27"
export_JOM 036 PEPT_E4_E04_CD8 _2020-06-16,161.884,30.8087,334.762,244.3,274.903,2144.23,112.522,2579.6,3302.26,59.0026,2031.14,FALSE,-2.52435550368556,29.1732047047383,"28"
export_JOM 036 PEPT_E4_E04_CD8 _2020-06-16,540.924,150.995,128.495,460.008,746.957,1035.21,-47.2854,10411.2,614.967,36.4103,-15.5214,FALSE,20.9464206053976,21.3940223206572,"8"
export_JOM 036 PEPT_E4_E04_CD8 _2020-06-16,1438.96,131.867,420.485,334.199,455.05,56.169,-97.2476,3039.36,215.084,1178.44,464.982,FALSE,-5.37112797096831,7.82392044704805,"2"
export_JOM 036 PEPT_E4_E04_CD8 _2020-06-16,3783.65,137.891,391.565,273.239,216.868,37.8367,43.3584,3029.14,136.058,1305.35,216.36,FALSE,22.3094690209549,2.79760672920357,"9"
export_JOM 036 PEPT_E4_E04_CD8 _2020-06-16,114.431,138.732,285.685,273.86,25.6848,1196.48,65.4643,33.9097,2.15325,934.757,470.176,FALSE,-25.1385977327145,14.5652190827137,"3"
export_JOM 036 PEPT_E4_E04_CD8 _2020-06-16,7939.86,238.721,319.928,2367.27,2127.35,-0.67042,256.026,732.731,150.674,1709.69,2194.4,FALSE,37.0955703613231,-13.6179005248755,"1"
export_JOM 036 PEPT_E4_E04_CD8 _2020-06-16,161.828,203.698,259.919,289.58,727.505,1104.09,104.416,7952.51,686.489,-41.3755,95.739,FALSE,13.3573097674599,17.1637630832437,"8"
export_JOM 036 PEPT_E4_E04_CD8 _2020-06-16,30.1455,103.469,109.613,48.716,1206.69,1010.54,-69.9746,5461.25,2720.69,-263.164,80.0517,FALSE,5.75271194928084,21.2381192065295,"28"
export_JOM 036 PEPT_E4_E04_CD8 _2020-06-16,51.3822,-7.03334,-82.6143,57.8527,453.666,724.078,9.21289,3623.08,2743.88,25.2874,264.664,FALSE,-6.92857511931757,24.7173890663212,"28"
export_JOM 036 PEPT_E4_E04_CD8 _2020-06-16,160.541,122.889,55.2615,79.6155,1147.08,571.701,-49.1999,6112.97,1785.12,-104.388,118.394,FALSE,3.29499721577227,19.7887372420182,"3"
export_JOM 036 PEPT_E4_E04_CD8 _2020-06-16,559.942,174.532,292.9,901.233,2057.21,180.701,41.161,3081.67,780.128,176.002,104.099,FALSE,-12.04849683589,6.58195355519391,"4"
export_JOM 036 PEPT_E4_E04_CD8 _2020-06-16,367.218,116.737,82.986,374.308,807.578,22.2603,63.9945,-562.644,1806.53,19.32,148.218,TRUE,-43.2769574425219,11.7225300410896,"5"
export_JOM 036 PEPT_E4_E04_CD8 _2020-06-16,-123.31,87.6973,159.657,-29.4377,437.712,1197.54,33.9485,802.862,737.396,242.249,72.4587,FALSE,-22.489132317406,14.3304784423001,"3"
export_JOM 036 PEPT_E4_E04_CD8 _2020-06-16,956.02,469.092,301.388,576.546,265.083,510.236,-18.562,746.439,-128.546,2448.14,1759.04,FALSE,-14.9387802775532,12.2743870985412,"22"
export_JOM 036 PEPT_E4_E04_CD8 _2020-06-16,1338.75,365.198,759.723,706.117,1259.82,1649.43,12.5874,4092.69,349.244,1538.33,435.537,FALSE,6.46220440817444,16.0427094487758,"3"
export_JOM 036 PEPT_E4_E04_CD8 _2020-06-16,628.238,131.231,222.684,272.238,185.867,770.514,16.1006,2730.99,1185.06,-3.76954,152.69,FALSE,-18.9568401916034,16.3840855337183,"3"
export_JOM 036 PEPT_E4_E04_CD8 _2020-06-16,9371.36,287.673,119.117,581.021,61.8415,-9.63072,91.8646,2331.23,2039.43,215.319,-116.307,FALSE,42.4131299434686,-8.3849933262996,"1"
export_JOM 036 PEPT_E4_E04_CD8 _2020-06-16,2353.19,23.4242,292.181,1290.34,3216.08,183.045,-1029.02,249.846,237.034,104749,-1374.9,FALSE,29.0297238070953,-7.09808540619678,"23"
export_JOM 036 PEPT_E4_E04_CD8 _2020-06-16,313.167,121.853,167.081,350.018,784.7,116.506,-26.6954,5902.97,336.215,375.056,1195.54,FALSE,-1.15266581080087,21.6921143071393,"2"
export_JOM 036 PEPT_E4_E04_CD8 _2020-06-16,707.628,174.688,433.102,242.059,406.459,411.527,253.945,4264.65,397.956,276.253,6204.89,FALSE,-17.5194087503204,37.3883230808457,"25"
export_JOM 036 PEPT_E4_E04_CD8 _2020-06-16,2614.33,5.5049,216.844,314.596,647.246,305.053,2.01847,2483.07,1.71957,5756.31,293.536,FALSE,6.0663964517309,-1.42495706225972,"9"
export_JOM 036 PEPT_E4_E04_CD8 _2020-06-16,8815.62,165.867,192.384,725.39,157.38,296.504,-1.52337,214.942,5533.85,209.988,120.443,TRUE,37.6398619516687,-2.29469842068319,"24"
export_JOM 036 PEPT_E4_E04_CD8 _2020-06-16,493.414,-18.9761,421.061,89.2898,97.2486,835.173,-112.458,8425.14,1761.63,-147.424,34.4713,FALSE,14.6395154045221,22.7374570657475,"8"
export_JOM 036 PEPT_E4_E04_CD8 _2020-06-16,4094.85,114.598,132.425,510.505,1037.28,295.027,14.5352,4977.13,840.401,-6.59152,332.572,FALSE,28.8640181024202,7.30591027529476,"9"
export_JOM 036 PEPT_E4_E04_CD8 _2020-06-16,790.706,230.032,252.699,556.284,280.527,139.887,-35.772,543.19,2324.22,310.726,-191.473,FALSE,-44.3053172362924,10.3948314681799,"5"
export_JOM 036 PEPT_E4_E04_CD8 _2020-06-16,-53.584,14.4996,92.4143,135.505,948.447,584.061,-90.3447,6009.4,2718.23,-32.2104,56.2232,FALSE,4.77495596791143,24.5897919209876,"28"
export_JOM 036 PEPT_E4_E04_CD8 _2020-06-16,170.887,132.277,323.116,960.47,1775.15,89.4872,199.269,466.654,2254.25,315.253,69.2534,FALSE,-43.3974871134752,1.81714215588591,"5"
export_JOM 036 PEPT_E4_E04_CD8 _2020-06-16,-45.8991,90.7097,14.6992,292.812,945.939,662.444,64.268,1129.35,560.85,184.613,-122.378,TRUE,-37.0977978750581,1.46325483917365,"5"
export_JOM 036 PEPT_E4_E04_CD8 _2020-06-16,8308.47,127.351,134.92,3113.54,1131.21,-29.7826,114.646,381.164,752.699,525.134,113.956,FALSE,39.0801479837355,-14.2834437542637,"1"
export_JOM 036 PEPT_E4_E04_CD8 _2020-06-16,288.393,116.16,130.554,586.524,2268.5,152.681,756.467,471.608,652.252,407.719,-23.7894,FALSE,-31.9251022877702,-1.16217512376665,"5"
export_JOM 036 PEPT_E4_E04_CD8 _2020-06-16,644.816,137.093,161.946,-29.5056,96.7132,528.311,-17.2493,697.027,1154.91,283.108,8.77592,FALSE,-35.167994077465,12.2644166567075,"5"
export_JOM 036 PEPT_E4_E04_CD8 _2020-06-16,-238.662,132.975,60.0554,-0.189499,844.977,1775.24,-188.949,4116.28,2365.35,165.512,272.46,FALSE,4.20581406093534,20.6215618540106,"3"
export_JOM 036 PEPT_E4_E04_CD8 _2020-06-16,-120.323,207.843,95.092,88.8572,862.049,1527.51,27.186,5499.26,581.005,16.0419,130.226,FALSE,5.94078047302796,14.6287009154806,"3"
export_JOM 036 PEPT_E4_E04_CD8 _2020-06-16,2887.59,80.4018,136.744,701.238,1364.45,56.4365,90.6489,788.656,1089.24,-93.8156,159.076,FALSE,2.9529437304534,-17.0284781216312,"9"
export_JOM 036 PEPT_E4_E04_CD8 _2020-06-16,3734.84,171.79,170.561,1591.72,2641.27,147.688,-142.77,332.023,741.718,582.105,-118.21,FALSE,9.02018086602449,-33.114637785893,"12"
export_JOM 036 PEPT_E4_E04_CD8 _2020-06-16,10652.8,146.416,234.232,3587.73,2085.1,38.1227,32.7923,245.209,271.438,1080.81,-173.956,FALSE,44.5047758540364,-12.6554740726206,"1"
export_JOM 036 PEPT_E4_E04_CD8 _2020-06-16,2062.19,64.5157,151.708,142.881,941.956,-6.81835,-67.9406,7999.23,723.9,19.977,64.3685,FALSE,27.8024072603319,14.6374025380595,"10"
export_JOM 036 PEPT_E4_E04_CD8 _2020-06-16,3036.91,134.752,237.469,386.3,201.65,402.506,-36.5632,5181.4,574.083,218.784,280.9,FALSE,25.71356302317,11.1856261746284,"9"
export_JOM 036 PEPT_E4_E04_CD8 _2020-06-16,19.4357,89.6779,136.597,257.195,1125.26,-9.97398,151.542,106.238,640.522,62.1545,44.052,FALSE,-31.5208627025256,-0.53660931477331,"5"
export_JOM 036 PEPT_E4_E04_CD8 _2020-06-16,2578.22,64.9866,149.878,249.627,911.22,-139.082,-327.23,14477.2,119.489,17869.4,15830.1,FALSE,13.6564207948548,48.6489559636912,"22"
export_JOM 036 PEPT_E4_E04_CD8 _2020-06-16,-168.919,104.648,195.816,234.093,117.992,356.597,153.853,598.487,566.63,353.09,152.98,TRUE,-36.7514241663911,13.6431900476135,"5"
export_JOM 036 PEPT_E4_E04_CD8 _2020-06-16,78.4629,98.6424,69.5718,252.601,964.951,567.899,61.6836,-358.443,5118.07,112.694,-13.5647,TRUE,-44.1179825298081,16.0071861023122,"27"
export_JOM 036 PEPT_E4_E04_CD8 _2020-06-16,199.438,88.7426,165.964,50.7678,286.763,19.6537,111.324,2028.08,-15.985,620.958,1280.25,FALSE,-18.218236687176,20.9579674084468,"17"
export_JOM 036 PEPT_E4_E04_CD8 _2020-06-16,1692.97,171.984,294.294,191.543,158.609,-45.6128,-147.1,2296.01,129.327,7159.21,8677.36,TRUE,-9.76930759320625,56.4790392685653,"22"
export_JOM 036 PEPT_E4_E04_CD8 _2020-06-16,8991.11,157.447,389.717,2814.27,2324.93,-58.4632,-25.6717,328.378,181.22,307.631,6189.11,FALSE,36.4912189726899,-4.42417806955309,"1"
export_JOM 036 PEPT_E4_E04_CD8 _2020-06-16,19300.4,191.719,337.573,971.723,2162.73,-113.613,35.033,34.8352,243.953,967.871,32.2725,FALSE,47.4467359339927,-1.41583986935827,"21"
export_JOM 036 PEPT_E4_E04_CD8 _2020-06-16,751.108,211.362,125.926,220.672,712.335,828.734,54.0175,342.715,795.985,610.127,19.9236,FALSE,-31.5982770077804,8.62459966055268,"5"
export_JOM 036 PEPT_E4_E04_CD8 _2020-06-16,2605.59,81.5726,103.083,292.15,100.711,20.128,-30.6349,2062.13,2462.3,228.719,282.5,FALSE,5.54115183703466,3.71687483078705,"9"
export_JOM 036 PEPT_E4_E04_CD8 _2020-06-16,3304.1,212.892,198.424,221.826,4.3559,159.556,29.2432,1738.49,-3.81449,490.771,712.866,FALSE,15.3625245208074,0.0160943390669898,"9"
export_JOM 036 PEPT_E4_E04_CD8 _2020-06-16,4804.13,110.163,282.337,1713.69,1282.71,120.436,-5.35015,3.38012,258.107,888.413,161.057,FALSE,16.9056628580558,-18.0323505403062,"1"
export_JOM 036 PEPT_E4_E04_CD8 _2020-06-16,-1.83999,180.825,148.95,134.035,660.577,1308.76,-46.5198,1949.33,1121.8,69.5466,230.018,FALSE,-13.0870401512153,16.6794479277413,"3"
export_JOM 036 PEPT_E4_E04_CD8 _2020-06-16,115.227,85.245,292.608,1072.52,1728.47,39.7157,-57.2798,2924.06,78.3264,1873.86,2009.9,FALSE,-12.7124442068561,0.370489459437618,"4"
export_JOM 036 PEPT_E4_E04_CD8 _2020-06-16,1428.46,984.613,1081.86,2787.08,99.2632,379.602,405.642,1090.71,586.018,440.697,308.915,FALSE,-39.7511417884329,0.0439154585969805,"7"
export_JOM 036 PEPT_E4_E04_CD8 _2020-06-16,42.7529,150.57,310.015,1877.85,453.999,218.465,-58.9902,2529.01,158.778,1904.41,2170.82,FALSE,-19.3126462464977,18.5033908743168,"17"
export_JOM 036 PEPT_E4_E04_CD8 _2020-06-16,462.716,78.7189,234.684,137.394,278.316,721.66,86.0755,554.154,-36.6887,981.509,736.111,FALSE,-27.3032939264131,17.0389368956563,"3"
export_JOM 036 PEPT_E4_E04_CD8 _2020-06-16,135.542,96.8706,139.664,74.002,462.616,799.973,29.3588,5610.19,941.834,-90.3014,-16.5508,FALSE,1.8032514038921,17.1005495512768,"3"
export_JOM 036 PEPT_E4_E04_CD8 _2020-06-16,2002.3,527.367,418.796,607.059,17.7089,166.802,11.0354,8256.09,834.763,253.478,53.3649,FALSE,31.5475528830912,13.0298169513237,"10"
export_JOM 036 PEPT_E4_E04_CD8 _2020-06-16,1246.74,223,88.5274,196.372,1116.5,454.333,182.156,632.462,1158.55,261.061,227.388,FALSE,-34.7713888014544,3.24529520755637,"5"
export_JOM 036 PEPT_E4_E04_CD8 _2020-06-16,656.314,20.8191,-186.289,115.485,43.2569,314.857,-204.518,-627.839,3971.96,90.7033,-92.7999,FALSE,-48.1085238661402,17.453760455797,"27"
export_JOM 036 PEPT_E4_E04_CD8 _2020-06-16,-188.993,177.628,306.068,190.664,471.86,1534.61,116.337,6160.63,653.042,382.864,235.474,FALSE,8.16795134103419,17.070746337561,"3"
export_JOM 036 PEPT_E4_E04_CD8 _2020-06-16,1236.98,194.515,249.576,182.517,64.022,811.812,47.6477,5504.53,106.281,845.768,1384.2,FALSE,2.3834537112868,21.7318042968526,"3"
export_JOM 036 PEPT_E4_E04_CD8 _2020-06-16,-51.9811,136.262,202.864,149.215,-127.694,414.615,77.4239,49.524,828.743,165.659,131.583,FALSE,-39.4950846283024,10.5613056543856,"5"
export_JOM 036 PEPT_E4_E04_CD8 _2020-06-16,1932.7,0.116534,-170.08,179.303,77.2193,20.3475,348.239,45.6813,16422.7,-310.707,5648.75,FALSE,8.38143536958171,48.9162414758222,"28"
export_JOM 036 PEPT_E4_E04_CD8 _2020-06-16,537.028,181.491,1510,606.932,899.967,169.422,-11.5757,628.619,745.689,724.265,183.831,FALSE,-31.8108336548213,-2.96739396427342,"5"
export_JOM 036 PEPT_E4_E04_CD8 _2020-06-16,74.3521,137.381,239.849,192.349,-108.059,1319.44,74.5243,6312.83,-7.36202,1668.53,290.143,FALSE,8.71665732645028,17.5393691966287,"3"
export_JOM 036 PEPT_E4_E04_CD8 _2020-06-16,4129.06,134.796,91.4962,1512.95,1536.77,161.472,57.0862,-72.7868,217.397,592.38,3623.76,FALSE,12.600043690614,-8.30425399233869,"6"
export_JOM 036 PEPT_E4_E04_CD8 _2020-06-16,294.435,267.734,323.056,481.152,2845.41,681.231,-34.7073,4465.02,281.211,1054.02,-149.784,FALSE,1.69113028137127,11.0994596390109,"4"
export_JOM 036 PEPT_E4_E04_CD8 _2020-06-16,391.664,111.899,287.852,52.4512,762.741,132.016,73.3055,4987.59,201.046,115.956,1191.95,FALSE,-5.60574213032679,21.462476802058,"2"
export_JOM 036 PEPT_E4_E04_CD8 _2020-06-16,140.99,96.9229,-6.89723,562.092,1635.43,2428.69,97.3989,3933.47,1932.82,101.879,1.44198,FALSE,5.66029248495855,16.5237389151956,"3"
export_JOM 036 PEPT_E4_E04_CD8 _2020-06-16,7007.76,109.613,126.663,1755.84,1525.64,-45.7394,-9.52827,728.363,-56.761,1005.34,67.1323,FALSE,33.7514191607358,-17.1739960276521,"1"
export_JOM 036 PEPT_E4_E04_CD8 _2020-06-16,3577.53,-19.193,192.868,-36.2297,1866.66,130.795,7.58593,-2.12349,-40.9478,1859.22,1916.55,FALSE,9.27580932611003,-12.1208394950464,"6"
export_JOM 036 PEPT_E4_E04_CD8 _2020-06-16,1472.75,168.704,170.495,117.147,158.313,130.75,-78.6296,4968.66,420.582,17947.5,-180.091,FALSE,19.6773144764236,-5.20173739810244,"15"
export_JOM 036 PEPT_E4_E04_CD8 _2020-06-16,12327.3,65.3138,104.968,2381.71,1814.22,82.3843,-43.6797,566.612,769.802,-341.819,184.874,FALSE,45.8446738148953,-7.87225104473602,"1"
export_JOM 036 PEPT_E4_E04_CD8 _2020-06-16,1176.5,192.758,463.658,789.292,2969.44,109.005,83.0586,341.561,236.386,902.369,289.382,FALSE,-19.1352003306636,-26.4539960088118,"16"
export_JOM 036 PEPT_E4_E04_CD8 _2020-06-16,10095.2,44.798,8.26874,1784.18,983.151,-25.2422,170.764,-131.923,1221.12,166.981,167.882,FALSE,41.4556000128218,-9.89031445294596,"1"
export_JOM 036 PEPT_E4_E04_CD8 _2020-06-16,1370.14,61.2546,201.149,133.626,-56.8521,362.112,-41.7365,6466.05,94.7345,1045.81,699.657,TRUE,18.5828290167842,9.71336839765265,"2"
export_JOM 036 PEPT_E4_E04_CD8 _2020-06-16,11237.9,76.483,154.97,1621.08,1456.23,-60.9119,85.2436,470.486,627.462,1242.39,960.74,FALSE,43.0235626550655,-9.33337586407973,"1"
export_JOM 036 PEPT_E4_E04_CD8 _2020-06-16,166.371,359.522,16.4829,220.372,176.873,115.158,-63.5366,518.962,3597.92,-8.6183,260.558,FALSE,-45.5609921901337,13.7397749795577,"27"
export_JOM 036 PEPT_E4_E04_CD8 _2020-06-16,133.466,159.73,74.4604,172.922,1714.28,443.33,-26.6228,2922.98,1634.04,74.588,-4.28504,FALSE,-16.2845044144986,14.2935454245995,"4"
export_JOM 036 PEPT_E4_E04_CD8 _2020-06-16,4809.92,529.445,17.5885,1402.22,131.998,125.161,116.019,511.902,2863.45,-85.5423,254.94,FALSE,18.1059370510584,-12.1084245051383,"24"
export_JOM 036 PEPT_E4_E04_CD8 _2020-06-16,263.201,759.893,579.314,2513.28,288.764,374.407,-19.2099,525.774,3243,467.251,323.614,FALSE,-60.8512336362851,9.16293300332274,"7"
export_JOM 036 PEPT_E4_E04_CD8 _2020-06-16,334.118,176.451,357.794,178.758,489.55,2056.96,51.6146,8708.33,711.831,523.584,450.036,FALSE,14.3415281869335,18.7572502103963,"8"
export_JOM 036 PEPT_E4_E04_CD8 _2020-06-16,527.661,19.2776,31.3178,515.726,638.78,240.87,-71.7565,2943.82,2958.53,239.259,-74.0328,FALSE,-14.3993673895469,22.8932219373098,"28"
export_JOM 036 PEPT_E4_E04_CD8 _2020-06-16,-116.575,102.65,185.441,394.385,734.112,267.978,1.07297,1751.81,569.682,-67.8407,33.1577,FALSE,-21.9675773585947,9.63107268169079,"5"
export_JOM 036 PEPT_E4_E04_CD8 _2020-06-16,742.237,190.848,493.939,463.386,189.468,108.741,-26.6031,312.816,76.2552,1188.7,198.672,FALSE,-19.1830723089996,0.78622637745309,"17"
export_JOM 036 PEPT_E4_E04_CD8 _2020-06-16,359.67,63.812,92.5757,186.053,327.758,317.23,-3.67758,268.646,1494.84,-124.789,-75.9903,FALSE,-42.1553166095976,9.18310118022558,"5"
export_JOM 036 PEPT_E4_E04_CD8 _2020-06-16,9485.74,155.381,506.122,2215.24,1772.2,-6.31806,20.3458,165.746,81.4469,1325.38,338.96,FALSE,42.0721836877828,-13.3919497663253,"1"
export_JOM 036 PEPT_E4_E04_CD8 _2020-06-16,2905.88,71.9325,176.311,679.907,1129.31,-6.69409,3.4097,660.627,568.695,332.146,35.5604,FALSE,3.16710336036959,-14.3786678808889,"9"
export_JOM 036 PEPT_E4_E04_CD8 _2020-06-16,767.16,171.874,256.95,581.611,957.756,247.308,81.9478,336.326,-18.8729,905.011,-2.79567,FALSE,-24.3832035179222,-5.49306370915778,"14"
export_JOM 036 PEPT_E4_E04_CD8 _2020-06-16,-127.086,-11.4827,178.179,392.797,1795.63,333.785,9.50084,6522.41,1944.41,-356.162,434.566,FALSE,2.06562252191584,20.9746935765756,"28"
export_JOM 036 PEPT_E4_E04_CD8 _2020-06-16,264.052,81.2753,200.16,292.261,553.432,1234.58,1.54,6660.83,284.691,458.191,1168.6,FALSE,8.7815436271697,21.0088733598096,"3"
export_JOM 036 PEPT_E4_E04_CD8 _2020-06-16,2039.43,82.8774,175.56,286.831,158.371,140.893,55.3068,1923.05,797.706,275.501,79.8168,FALSE,-7.31388602945971,5.30615533392815,"5"
export_JOM 036 PEPT_E4_E04_CD8 _2020-06-16,-66.375,56.3458,186.342,186.134,277.366,38.075,97.5289,274.541,-5.93055,2602.12,2118.88,FALSE,-22.2931384278518,21.6881554844744,"17"
export_JOM 036 PEPT_E4_E04_CD8 _2020-06-16,9354.61,225.299,138.062,2179.49,1848.85,143.167,105.256,-242.984,221.03,950.666,-48.2497,FALSE,41.7451220314864,-13.5039084648237,"1"
export_JOM 036 PEPT_E4_E04_CD8 _2020-06-16,6887.41,100.198,187.718,1468.37,1036.03,-96.2895,52.1042,590.676,-139.312,941.943,134.715,FALSE,31.767922874528,-15.5724746915559,"1"
export_JOM 036 PEPT_E4_E04_CD8 _2020-06-16,-103.974,277.695,510.847,595.551,1287.68,252.507,-17.565,3206.73,305.682,916.2,499.525,FALSE,-12.8070830113007,7.97214708716955,"4"
export_JOM 036 PEPT_E4_E04_CD8 _2020-06-16,1452.69,176.292,220.178,-1.97969,337.131,11.6725,15.8434,2082.37,747.523,120.803,4.49961,FALSE,-13.2723359419146,7.30220925016439,"5"
export_JOM 036 PEPT_E4_E04_CD8 _2020-06-16,9820.5,323.294,795.747,4821.78,2482.59,14.684,6.12497,588.264,434.716,895.976,227.152,FALSE,44.7889897730379,-14.6337525434484,"1"
export_JOM 036 PEPT_E4_E04_CD8 _2020-06-16,228.299,161.435,432.072,1409.26,2159.08,191.335,-7.79372,2215.69,156.792,1448.03,1298.21,FALSE,-17.7180904935928,-5.75313934891496,"4"
export_JOM 036 PEPT_E4_E04_CD8 _2020-06-16,242.083,99.4119,168.4,286.194,1297.85,2054.16,-84.4994,6680.7,1585.19,373.532,-123.777,FALSE,11.5367798922347,16.6881304089504,"3"
export_JOM 036 PEPT_E4_E04_CD8 _2020-06-16,20594.8,209.503,471.383,1111.86,1475.05,216.11,57.517,618.598,151.026,1907.59,1580.84,TRUE,47.9789855921047,-4.5762095924494,"21"
export_JOM 036 PEPT_E4_E04_CD8 _2020-06-16,898.619,182.797,152.667,1163.17,1495.61,149.025,18.0108,777.031,561.864,268.262,30.6705,FALSE,-23.0038719600723,-9.84478083362723,"5"
export_JOM 036 PEPT_E4_E04_CD8 _2020-06-16,17380.3,100.12,123.567,2414.45,2488.46,-170.132,62.9426,303.222,675.229,-524.776,110.175,FALSE,46.7455179855191,-2.90323677375313,"1"
export_JOM 036 PEPT_E4_E04_CD8 _2020-06-16,-14.9477,192.652,122.623,184.178,1202.63,1039.26,7.73469,6818.9,1774.94,-15.2882,163.196,FALSE,8.81918941868544,18.3745146406789,"28"
export_JOM 036 PEPT_E4_E04_CD8 _2020-06-16,-34.4235,471.744,351.596,1119.25,84.8475,335.537,97.1638,-511.35,1229.74,101.307,179.75,FALSE,-48.956734324585,4.57943300055052,"7"
export_JOM 036 PEPT_E4_E04_CD8 _2020-06-16,127.565,421.931,520.436,1275.44,35.9732,165.503,300.015,366.229,1438.84,431.093,126.877,FALSE,-52.647599718159,5.07493086163297,"7"
export_JOM 036 PEPT_E4_E04_CD8 _2020-06-16,13333.6,102.095,297.937,2927.19,2870.86,274.859,233.013,103.33,46.6759,1040.44,16.7768,FALSE,46.6201504162792,-7.62904707524408,"1"
export_JOM 036 PEPT_E4_E04_CD8 _2020-06-16,-387.885,128.4,316.431,468.598,624.748,168.922,-217.945,5098.17,255.2,6405.91,6759.09,FALSE,-8.68091687046518,44.006935724226,"22"
export_JOM 036 PEPT_E4_E04_CD8 _2020-06-16,9501.93,40.3531,161.021,2735.14,2421.88,36.1419,114.987,130.271,209.792,1036.62,1106.98,FALSE,41.7978031272739,-13.2571348255007,"1"
export_JOM 036 PEPT_E4_E04_CD8 _2020-06-16,328.332,12.4763,227.444,90.0272,330.465,75.9229,27.9346,6597.01,941.157,-31.7113,161.186,FALSE,6.23431344203167,19.8540938470444,"10"
export_JOM 036 PEPT_E4_E04_CD8 _2020-06-16,345.446,582.55,-197.946,7152.87,59.5877,266.663,-77.2869,205.866,9792.52,375.882,132.331,FALSE,-13.618567317203,37.905909544191,"28"
export_JOM 036 PEPT_E4_E04_CD8 _2020-06-16,235.805,67.3904,222.28,155.128,-142.654,27.7491,19.4129,62.6766,38.6175,1145.52,1077.13,FALSE,-21.4533542224348,15.2629491578182,"17"
export_JOM 036 PEPT_E4_E04_CD8 _2020-06-16,3584.9,230.482,436.123,222.995,-2.28795,125.74,81.1497,4603.81,573.446,261.456,25.4437,FALSE,26.9088515090283,9.34137148725291,"9"
export_JOM 036 PEPT_E4_E04_CD8 _2020-06-16,6918.57,72.3797,-3.19965,107.438,175.722,95.865,-14.8803,379.027,5285.18,199.143,832.048,FALSE,36.8687627202032,-7.18805535645174,"24"
export_JOM 036 PEPT_E4_E04_CD8 _2020-06-16,268.726,119.992,259.069,212.516,-21.8854,423.061,-79.2375,-178.763,737.48,700.554,152.257,FALSE,-34.6078354812785,7.10875445328583,"5"
export_JOM 036 PEPT_E4_E04_CD8 _2020-06-16,705.403,716.899,760.799,5150.35,358.699,318.552,132.545,-342.145,855.726,1291.07,663.315,FALSE,-35.1597296885809,-7.08231921989161,"7"
export_JOM 036 PEPT_E4_E04_CD8 _2020-06-16,-3.18497,79.57,262.105,568.371,877.254,101.123,53.1061,1865.39,6.82426,173.662,753.67,FALSE,-18.5806103584458,6.65628143744614,"17"
export_JOM 036 PEPT_E4_E04_CD8 _2020-06-16,112.299,92.0101,246.721,1758.96,2304.26,106.848,14.6981,356.485,96.1647,14.0517,1410.7,FALSE,-24.2144654521978,-17.5335200921287,"14"
export_JOM 036 PEPT_E4_E04_CD8 _2020-06-16,1014.25,63.6682,151.672,77.8984,236.619,87.9113,-38.4808,3247.01,1856.74,235.039,-65.8002,FALSE,-14.1842711173348,15.9132779507203,"28"
export_JOM 036 PEPT_E4_E04_CD8 _2020-06-16,3051.52,191.021,333.207,954.737,915.135,268.311,0.821367,-67.8918,683.392,-272.277,341.02,FALSE,3.5489807319004,-14.2158052507922,"9"
export_JOM 036 PEPT_E4_E04_CD8 _2020-06-16,1351.93,27.5833,243.466,41.7326,233.332,186.693,51.6087,52.7791,606.403,130.324,-58.0345,FALSE,-29.1002826060096,3.87060436088791,"5"
export_JOM 036 PEPT_E4_E04_CD8 _2020-06-16,5073.76,103.931,259.418,15.4446,168.38,34.6908,51.1626,6264.65,26.7543,244.26,1206.01,TRUE,31.9209225214411,4.75879334550358,"9"
export_JOM 036 PEPT_E4_E04_CD8 _2020-06-16,216.393,183.373,145.185,327.699,1509.54,6397.35,-86.0932,5311.21,1027.95,435.499,181.579,FALSE,6.72234843500182,14.5921903692532,"11"
export_JOM 036 PEPT_E4_E04_CD8 _2020-06-16,1574.67,775.432,694.376,1003.96,349.327,180.668,91.4121,886.45,1040.69,619.659,195.658,FALSE,-27.3001424941969,0.209470036919545,"5"
export_JOM 036 PEPT_E4_E04_CD8 _2020-06-16,9239.01,-15.3581,153.477,2620.72,1894.62,54.7088,-30.8838,-596.383,241.181,936.047,43.2062,FALSE,42.0418990554731,-14.3466541580048,"1"
export_JOM 036 PEPT_E4_E04_CD8 _2020-06-16,333.589,41.2487,184.926,152.312,744.675,28.4677,56.2157,37.501,122.15,709.326,833.134,FALSE,-21.548284452108,0.926614991263597,"17"
export_JOM 036 PEPT_E4_E04_CD8 _2020-06-16,11433.5,162.138,170.838,1953.6,2124.18,12.5376,108.965,711.197,516.323,1335.05,584.622,FALSE,43.9239495073255,-10.1455674023522,"1"
export_JOM 036 PEPT_E4_E04_CD8 _2020-06-16,9379.23,92.8796,222.135,1568.15,2213.43,-96.2811,214.248,12.1974,278.037,601.164,751.741,FALSE,40.828723347227,-13.0063729871525,"1"
export_JOM 036 PEPT_E4_E04_CD8 _2020-06-16,20.881,162.465,322.199,80.7469,120.899,136.748,13.3793,-217.533,-57.7838,534.946,1527.01,FALSE,-22.4551429639768,24.0620009299185,"17"
export_JOM 036 PEPT_E4_E04_CD8 _2020-06-16,1376.14,197.576,227.093,251.833,-249.307,954.893,188.487,52.3999,-34.6553,1610.13,49.5846,FALSE,-23.8069865243504,8.58483482528075,"3"
export_JOM 036 PEPT_E4_E04_CD8 _2020-06-16,413.895,114.652,24.4028,166.339,1096.28,346.538,23.8185,8594.38,5140.47,-73.8869,4.59935,FALSE,11.2539773873549,37.4952657017233,"28"
export_JOM 036 PEPT_E4_E04_CD8 _2020-06-16,370.685,763.941,509.288,5075.45,335.638,687.741,307.086,-233.536,1566.47,430.185,280.784,FALSE,-59.5982469143671,0.67496945697104,"7"
export_JOM 036 PEPT_E4_E04_CD8 _2020-06-16,406.755,130.823,-775.813,153.756,37.6235,53.1768,-245.22,3159.01,20529.9,-1.18422,2481.53,FALSE,12.2608184551417,49.4213756467799,"28"
export_JOM 036 PEPT_E4_E04_CD8 _2020-06-16,-95.6973,115.845,220.949,366.237,-83.2846,90.3597,44.792,2159.46,35.0327,1292.3,1264.8,FALSE,-18.6478274309132,19.3267885304987,"17"
export_JOM 036 PEPT_E4_E04_CD8 _2020-06-16,42.0552,95.7099,107.086,195.474,398.582,1164.87,89.6052,971.93,620.489,115.558,-116.559,FALSE,-24.1556445059362,12.5966875293591,"3"
export_JOM 036 PEPT_E4_E04_CD8 _2020-06-16,2033.65,24.4867,84.0798,209.339,-111.371,-14.3736,20.3557,8239.04,1547.64,269.537,26.889,FALSE,26.8543056497239,14.1013580383066,"10"
export_JOM 036 PEPT_E4_E04_CD8 _2020-06-16,130.675,249.955,347.19,4258.78,264.924,179.932,-72.7184,2339.16,364.515,2060.56,2014.05,FALSE,-20.2251894916021,2.63437514473793,"6"
export_JOM 036 PEPT_E4_E04_CD8 _2020-06-16,12889.3,97.6775,329.037,3142.41,1444.63,-44.8097,-22.6073,-272.354,851.209,226.198,157.571,TRUE,45.023651924652,-8.18724296781285,"1"
export_JOM 036 PEPT_E4_E04_CD8 _2020-06-16,1291.49,944.508,906.422,6672.64,187.484,367.053,226.628,156.213,3012.9,607.379,319.145,FALSE,-52.1865173473029,-0.835293561533961,"7"
export_JOM 036 PEPT_E4_E04_CD8 _2020-06-16,-473.102,148.363,340.914,169.168,7.9263,1017.34,31.9845,1124.71,448.513,173.062,6453.05,FALSE,-18.5418951449502,41.9012096644203,"25"
export_JOM 036 PEPT_E4_E04_CD8 _2020-06-16,838.594,395.8,1241.21,851.885,1048.56,353.074,-80.7305,1737.11,400.355,3776.99,1118.84,FALSE,-12.4642778308193,-2.070004082036,"15"
export_JOM 036 PEPT_E4_E04_CD8 _2020-06-16,8447.54,32.7715,159.716,195.924,-57.0633,73.8237,53.526,382.56,13.475,1922.91,1058.23,FALSE,34.0067730339947,-11.5790887532117,"1"
export_JOM 036 PEPT_E4_E04_CD8 _2020-06-16,206.243,126.734,398.787,308.325,1191.95,197.794,146.194,549.177,153.204,181.589,956.137,FALSE,-29.5415660483907,3.05422042127436,"17"
export_JOM 036 PEPT_E4_E04_CD8 _2020-06-16,11580.9,176.059,558.457,1952.88,1390.07,108.135,-65.1222,353.78,348.569,1644.62,371.295,FALSE,44.1677343769761,-9.99381962330638,"1"
export_JOM 036 PEPT_E4_E04_CD8 _2020-06-16,2810.65,-8.50184,150.722,230.742,-123.714,283.684,6.69923,194.664,50.7114,1139.63,1237.13,FALSE,-0.00375012260436422,-1.74357902960995,"9"
export_JOM 036 PEPT_E4_E04_CD8 _2020-06-16,12719.2,261.949,348.279,6757.55,3334.6,17.4619,-19.0535,-151.537,605.098,5814.48,7574.71,TRUE,4.87426219240337,63.6499778967986,"21"
export_JOM 036 PEPT_E4_E04_CD8 _2020-06-16,6818.59,449.988,407.745,1228.31,1433.29,233.614,66.4743,2036.89,1503.01,304.073,579.46,FALSE,31.4271542839367,-12.2563324051364,"1"
export_JOM 036 PEPT_E4_E04_CD8 _2020-06-16,6767.03,94.6221,515.741,173.76,216.093,-23.69,-78.5223,15222,1540.61,168.889,210.762,FALSE,39.936780282314,12.9610744631472,"29"
export_JOM 036 PEPT_E4_E04_CD8 _2020-06-16,276.6,155.775,55.1439,453.754,776.014,98.3246,-43.3683,-1.50147,1036.33,91.9464,250.669,FALSE,-33.8949568107054,1.32903133669855,"5"
export_JOM 036 PEPT_E4_E04_CD8 _2020-06-16,2994.47,198.158,280.533,224.169,62.4133,673.388,78.2033,1004.58,65.4585,924.725,131.9,FALSE,6.74116354054937,-0.162761854034124,"9"
export_JOM 036 PEPT_E4_E04_CD8 _2020-06-16,28.4242,209.613,263.751,868.831,1561.03,35.987,60.457,1740.8,110.156,1364.57,279.828,FALSE,-19.5148854479409,-5.61813312397315,"14"
export_JOM 036 PEPT_E4_E04_CD8 _2020-06-16,-297.95,51.8495,156.96,152.923,86.6228,-2.98815,-109.227,7210.65,1145.67,159.656,96.9606,FALSE,8.00545289956755,19.5242317554727,"10"
export_JOM 036 PEPT_E4_E04_CD8 _2020-06-16,97.4411,59.4812,93.8069,222.389,1029.88,472.662,100.45,288.552,897.297,5.23803,103.973,FALSE,-38.0160355157365,4.86057724190912,"5"
export_JOM 036 PEPT_E4_E04_CD8 _2020-06-16,906.938,112.907,175.544,648.156,673.021,213.392,-37.635,2518.34,663.161,146.642,-2.49147,FALSE,-16.3334793658128,11.9494703651724,"5"
export_JOM 036 PEPT_E4_E04_CD8 _2020-06-16,242.84,97.8457,172.493,202.737,41.0689,212.467,27.2501,1226.66,127.651,1050.26,292.433,FALSE,-23.5603519442083,8.0606600369897,"17"
export_JOM 036 PEPT_E4_E04_CD8 _2020-06-16,-77.9552,437.678,190.972,214.321,371.226,862.266,-20.1967,2077.73,-10.9215,3774.52,285.262,FALSE,-11.4605711930333,10.0800867780968,"3"
export_JOM 036 PEPT_E4_E04_CD8 _2020-06-16,515.883,229.293,130.043,669.732,871.892,23.459,-34.5891,3228.02,782.861,-155.269,188.211,FALSE,-13.2798718687865,11.0240154766981,"5"
export_JOM 036 PEPT_E4_E04_CD8 _2020-06-16,1953.88,186.674,728.539,565.031,685.301,1442.49,93.9177,1317.56,115.468,2004.35,461.986,FALSE,-3.69084884388589,10.120679138397,"3"
export_JOM 036 PEPT_E4_E04_CD8 _2020-06-16,11782.9,151.644,108.693,2829.13,1898.59,65.0306,64.9865,-230.03,650.649,184.949,286.169,TRUE,44.0841472069366,-9.30346262379805,"1"
export_JOM 036 PEPT_E4_E04_CD8 _2020-06-16,160.528,177.377,346.311,267.211,-104.012,454.115,8.92122,8101.85,44.9224,390.777,3490.83,FALSE,3.41011639698405,31.5280937913934,"25"
export_JOM 036 PEPT_E4_E04_CD8 _2020-06-16,4533.32,126.349,59.6802,2914.17,1289.28,77.9223,-38.5225,92.2854,1171.04,203.649,47.9039,FALSE,15.1585261637252,-20.6503733749459,"9"
export_JOM 036 PEPT_E4_E04_CD8 _2020-06-16,195.279,144.456,341.387,301.359,185.365,884.537,10.2943,2112.94,1198.08,-93.151,268.032,FALSE,-21.7888466127615,16.3969668187932,"3"
export_JOM 036 PEPT_E4_E04_CD8 _2020-06-16,8993.64,43.6248,153.315,767.519,1446.67,23.5577,57.8796,1353.87,572.021,146.272,81.5787,FALSE,39.5352872688294,-11.5850112129759,"1"
export_JOM 036 PEPT_E4_E04_CD8 _2020-06-16,393.837,104.103,236.553,271.668,-30.4969,74.9402,75.8601,392.99,42.6585,442.461,996.426,TRUE,-26.3027572544105,30.0662355423768,"17"
export_JOM 036 PEPT_E4_E04_CD8 _2020-06-16,1335.71,77.2752,162.895,1249.17,2678.46,-33.5698,49.3629,17.4532,573.139,316.092,-59.4801,FALSE,-13.2505144656073,-26.6608934697548,"16"
export_JOM 036 PEPT_E4_E04_CD8 _2020-06-16,-77.4148,22.4065,121.083,268.094,1663.91,493.5,55.5628,1091.39,1383.69,-184.163,33.4465,TRUE,-37.6745364355835,0.525898894764205,"5"
export_JOM 036 PEPT_E4_E04_CD8 _2020-06-16,1528.47,213.29,121.657,61.6179,206.253,680.029,54.4828,887.58,1.46733,1803.5,1870.52,FALSE,-14.2752707627874,15.6909461619745,"3"
export_JOM 036 PEPT_E4_E04_CD8 _2020-06-16,255.93,-5.73236,173.643,433.681,-15.6271,64.4978,12.4691,424.716,714.686,272.299,247.662,FALSE,-32.8383871606682,8.43469627306283,"5"
export_JOM 036 PEPT_E4_E04_CD8 _2020-06-16,341.988,143.963,505.15,2323.33,3100.79,170.276,-28.5717,61.5298,1110.78,-27.9323,452.245,FALSE,-28.9158025481519,-24.5664776626712,"16"
[truncated: 57,005 more rows]
