# Supplementary material for: Selective loss of CD107a TIGIT+ memory HIV-1-specific CD8+ T cells in PLWH over a decade of ART
Source: eLife. 2023 Sep 19;12:e83737. doi: 10.7554/eLife.83737 (PMC10508883; doi:10.7554/eLife.83737)
Supplement: Figure 4—source data 2. [file elife-83737-fig4-data2.xlsx]

## Sheet: HIV-specific
			Clusters with statistical differences between groups						Other clusters with no significant differences between groups
Patients	Group	Condition	C1	C2	C3				C4	C5	C6	C7	C8	C9	C10	C11	C12	C13	C14	C15	C16	C17	C18	C19	C20	C21	C22	C23	C24	C25	C26
EI1	Ei	HIV	7.4	0	10.96				0.27	1.37	14.52	1.92	6.03	3.29	10.68	0.82	5.48	5.75	1.37	0	0	1.37	2.74	0	3.56	4.66	2.74	0.55	0	1.92	4.66
EI10	Ei	HIV	4.92	10.07	16.89				3.57	1.07	0.1	2.16	2.73	2.65	1.77	0.39	0.81	0.99	0.49	7.68	2.06	3.77	4.29	13.38	2.16	4.01	4.48	1.64	1.64	2.79	1.85
EI11	Ei	HIV	2.55	7.04	0.99				6.73	11.55	0.2	3.39	4.27	1.36	2.04	0.54	2.92	0.68	0.54	3.12	0.41	2.44	6.31	1.97	6.85	4.34	2.17	0.41	2.17	7.19	4.68
EI13	Ei	HIV	8.01	1.09	26.05				1.9	1.49	0.07	1.35	2.81	8.55	14.07	0.07	2.7	1.39	0.37	1.5	5.3	3.47	3.07	8.7	3.58	4.42	1.83	0.4	0.33	0.48	2.23
EI16	Ei	HIV	7.82	13.34	10.45				0.15	0.29	0	1.4	4.95	7.26	2.06	0.33	1.16	0.83	0.33	0.25	5.28	3.71	0.58	9.08	1.82	5.78	0.33	3.3	0	0.66	1.65
EI17	Ei	HIV	12.38	5.69	29.37				1.4	0.08	0	0	9.49	1.58	1.58	0.4	0.4	0.4	0	3.56	2.37	1.58	0.4	46.64	0	2.37	0	0.79	0.4	0	1.19
EI18	Ei	HIV	5.93	11.07	8.3				0.4	0.4	0	0.73	3.39	7.5	3.26	0.73	0.85	0.97	0.24	3.63	8.1	8.22	0.48	32.41	0.97	2.78	0.6	0.85	0.6	0.6	1.09
EI19	Ei	HIV	6.29	4.96	9.19				0.36	0.24	9.14	2.8	5.3	2.28	6.75	11.01	4.26	2.18	1.56	0.21	0	1.45	4.47	0.31	2.91	7.68	0.93	2.49	0.1	2.8	4.57
EI2	Ei	HIV	6.96	0.1	11.63				2.18	2.6	0.38	1.92	4.42	6.73	2.12	0	1.35	0.58	0.19	4.04	5	7.88	3.08	4.04	2.5	14.23	0.77	0.19	2.88	0.19	2.31
EI20	Ei	HIV	13.46	11.92	5.19				0.19	0	0.67	1.01	4.38	9.09	4.38	0.67	2.69	0.67	0.67	9.43	2.36	3.37	0.67	6.4	0.67	5.72	1.01	0	5.39	0.34	2.36
EI21	Ei	HIV	9.09	18.86	2.69				0	0	0.81	2.43	4.32	4.59	18.92	0	4.59	3.78	1.08	7.03	0.81	1.35	1.08	3.78	3.51	2.7	2.7	0.27	6.76	0.27	0.54
EI22	Ei	HIV	6.22	15.41	3.24				0	0.27	0.1	3.04	8.32	6.29	4.46	0.1	0.91	0.41	0.3	1.72	0.3	2.84	3.35	1.01	5.17	2.94	0.81	9.63	0.1	2.03	0.91
EI23	Ei	HIV	11.87	0.2	27.69				2.94	0.81	0.36	3.1	1.69	2.5	0.75	0.44	1.67	0.06	0.05	6.79	1.48	2.73	2.04	9.05	7.25	1.38	0.4	0.25	5.41	17.51	3.85
EI24	Ei	HIV	7.56	1.89	7.56				0.34	0.86	0.69	1.37	7.56	5.15	8.93	0.34	4.98	3.44	2.41	11	0.86	2.75	4.3	6.7	4.81	3.95	2.06	0.34	5.5	0.86	1.55
EI3	Ei	HIV	19.52	0	9.59				0.68	1.03	3.77	3.08	6.16	4.11	4.11	1.37	1.71	2.05	3.08	0.34	0	0	1.37	0	4.11	20.55	2.4	1.03	0.34	0	4.79
EI4	Ei	HIV	5.02	0	1.41				0.78	0.63	0.31	8.46	11.29	3.76	9.4	16.3	3.29	3.61	0.94	0.63	0.31	8.62	6.9	2.82	7.05	1.88	0.16	1.1	0	0.78	2.51
EI5	Ei	HIV	3.46	0	15.63				3.32	1.11	2.49	2.07	13.28	2.07	8.71	12.17	3.6	0.28	0.41	0.28	0	3.87	5.12	0.69	9.68	0.28	1.66	7.05	0	1.38	0.69
EI6	Ei	HIV	9.46	13.64	18.14				3.57	0.78	0.16	1.24	4.65	2.95	1.4	0.47	0.93	0.78	0.93	2.79	2.48	3.72	3.1	16.28	0.78	7.91	0.47	0.78	0.47	0.16	0.93
EI7	Ei	HIV	6.27	18.81	3.45				0	0	0.31	1.88	4.39	8.15	9.4	1.25	1.25	1.25	0.63	5.02	3.13	10.97	4.08	7.52	5.02	0.94	0	0	4.39	0.31	0.94
EI8	Ei	HIV	4.3	0	13.98				1.08	2.15	0	4.3	3.23	8.6	9.68	8.6	5.38	0	3.23	0	1.08	1.08	8.6	0	5.38	9.68	1.08	2.15	0	0	4.3
EI9	Ei	HIV	6.02	0	4.17				0.46	0.46	10.65	1.39	4.17	12.96	6.48	13.89	10.65	2.31	2.31	0	0	0.46	3.24	0.93	3.24	4.17	3.24	0	0	0	4.17
S1	S1	HIV	3.41	0	11.11				5.38	4.66	2.87	2.15	2.69	2.69	6.45	17.56	6.27	0.54	1.61	0	0	3.41	6.99	0.18	3.23	2.15	4.48	3.41	0	5.38	2.15
S10	S1	HIV	2.22	0	0.56				0	4.44	6.72	2.94	5.25	2.31	6.09	13.03	3.99	1.26	2.31	0.21	0	2.31	6.93	0.21	2.94	1.47	2.94	3.15	0	5.25	2.52
S12	S1	HIV	2.29	0	4.01				1	3	2.22	6.11	9.44	0.56	11.67	28.33	3.33	0.56	0.56	0	0.56	2.78	11.11	0	13.33	0	0	0	0	0	1.67
S13	S1	HIV	6.88	14.79	0.73				0.15	0.15	4.22	0.55	9.72	1.1	41.65	3.67	16.88	6.61	0.37	0	0	0	0.73	0	1.47	0	1.28	0.18	0	1.28	2.75
S16	S1	HIV	4.95	2.48	0				0	0.5	1.24	0.62	0.62	4.97	2.48	0	2.48	0	0.62	9.32	0.62	2.48	17.39	8.07	1.86	0.62	4.97	3.11	1.24	6.21	1.24
S19	S1	HIV	0	3.23	12.9				0	0	15.69	3.09	10.05	2.01	21.57	1.81	8.53	2.6	0.83	0.25	0	1.91	1.03	0.39	6.42	0.34	1.57	1.37	0.05	1.03	1.76
S2	S1	HIV	2.15	0	1.63				0.13	0.91	25.32	3	7.15	2.72	19.74	1.57	7.87	1.57	1.29	0.29	0.14	1.29	2.58	0.14	5.44	0	2.15	1.14	0.57	1	1.86
S20	S1	HIV	5.21	23.45	0				0.2	0.8	1.32	0.44	3.81	9.37	3.95	1.02	1.9	0.73	0.29	11.27	2.2	4.39	2.64	12.01	1.02	1.32	0.15	0.44	6.59	0	1.46
S21	S1	HIV	0	9.68	0				0	0	3.32	1.66	9.54	10.79	10.79	3.73	4.15	0	0.41	9.13	1.24	10.79	3.73	6.22	5.81	0	0	0.83	6.22	0	0.83
S22	S1	HIV	11.24	2.27	23.61				2.65	0.25	0	0.52	1.56	7.27	2.08	0	1.3	0.52	0.26	7.53	4.16	4.68	3.12	26.75	0.26	0.52	0.26	0.26	0.52	0	3.38
S23	S1	HIV	0	0	0				0	2.7	0	0	7.92	2.48	14.36	0	1.98	0.5	0.99	1.98	1.49	12.87	20.79	21.29	2.48	1.49	0	0	0	0	0.5
S24	S1	HIV	3.57	1.02	2.04				0	0	0	0.86	6.03	5.6	23.28	0.86	2.16	0.43	0	0.86	1.72	17.67	21.98	4.74	5.6	0.86	0	0.43	0	0.86	0
S3	S1	HIV	2.99	0	21.51				0.85	1.99	0	0	6.45	12.9	9.68	3.23	0	3.23	6.45	0	3.23	9.68	0	22.58	6.45	0	0	0	0	0	0
S5	S1	HIV	3.95	0	2.91				0	0.83	0.27	0.81	2.43	9.97	4.31	1.35	1.35	2.7	1.08	6.74	5.93	8.63	0.54	26.15	1.35	1.35	0.54	0.81	1.08	0.54	2.16
S6	S1	HIV	NA	NA	NA				NA	NA	NA	NA	NA	NA	NA	NA	NA	NA	NA	NA	NA	NA	NA	NA	NA	NA	NA	NA	NA	NA	NA
S7	S1	HIV	3.56	24.89	0.44				0	0	1.76	3.06	6.77	1.82	4.16	47.17	4.16	0.72	0.78	0.59	0.13	6.64	8.46	1.24	4.94	0.13	0.2	0.98	0.07	0.13	0.65
S8	S1	HIV	2.62	0	10.06				3.15	5.16	5.88	1.2	9.71	0.96	5.28	39.93	2.76	0.12	1.2	0.12	0	2.52	14.03	0.72	5.28	0.12	0.12	1.2	0	0.36	0.12
S9	S1	HIV	5.28	7.14	0.83				0.21	1.24	0.2	1.8	2.4	7.01	1.6	0	0.8	0.4	1.2	18.04	3.61	2.61	2.2	16.23	5.01	0	0	0.2	6.61	0	0
S1	S2	HIV	5.04	0	14.71				2.52	4.83	0.3	0.47	3.74	6.88	0.47	0.36	0.59	0.06	0.83	17.08	3.8	4.74	1.36	17.56	1.13	0.71	0.06	0.12	10.97	0	0.24
S10	S2	HIV	2.75	0	2.39				0.55	0.92	0.51	0.34	4.04	4.71	3.87	0.84	4.04	0.34	1.01	18.18	3.03	3.37	4.21	17.34	4.88	0	0.51	0	6.9	0	0.51
S11	S2	HIV	0.62	1.86	9.94				8.7	3.73	3.23	0	9.68	9.68	9.68	0	6.45	0	0	12.9	6.45	9.68	0	6.45	0	0	3.23	0	9.68	0	0
S12	S2	HIV	2.89	0.05	4.12				0.54	2.5	0.25	1.89	6.31	7.83	1.89	0.88	0.76	0.88	1.14	0.88	2.53	4.29	1.26	16.67	2.53	2.53	0.38	3.54	0	0.38	2.65
S13	S2	HIV	1.66	6.64	0.41				0	0.83	0	2.07	10.65	8.29	1.79	0.28	1.32	0.94	0.57	0.47	2.64	4.34	0.47	15.27	0.66	2.54	0.66	5.56	0	0.47	1.32
S14	S2	HIV	2.6	30.39	0.26				0.26	1.04	2.7	2.7	2.7	0	24.32	13.51	24.32	0	2.7	0	0	0	10.81	0	5.41	0	0	0	0	0	5.41
S16	S2	HIV	1.29	0	3.88				0	0.43	3.4	6.79	4.15	3.4	9.06	13.21	10.57	0.75	2.64	0.38	0.38	3.02	10.94	0	6.79	0	0.38	0	0	0	3.02
S19	S2	HIV	5.93	8.63	3.77				0.27	0.54	1.02	1.02	4.08	3.57	6.63	0.51	3.57	0	1.53	20.41	0	5.1	6.63	7.14	9.18	0	3.06	0.51	9.18	3.57	1.02
S2	S2	HIV	1.2	0	0.84				0.6	5.16	1.92	0.8	2.32	3.51	7.36	0.46	3.78	0.27	1.53	21.68	0.66	2.92	3.71	6.3	2.98	0.13	3.18	0.4	23.54	1.53	1.59
S20	S2	HIV	3.56	23.43	0.12				0.12	0.36	1	1.42	1.42	0.43	4.99	4.56	9.4	1.99	0.71	0	0	0.43	1.57	0	4.13	0.85	16.95	2.42	0	9.97	6.13
S21	S2	HIV	0.84	17.85	0.17				0.34	1.01	1.63	3.65	1.91	1.21	3.51	8.3	9.08	1.74	0.67	0.07	0	0.6	1.81	0.07	5	0.89	12.27	2.23	0	6.52	10.82
S22	S2	HIV	10.56	3.39	20.92				3.96	0.47	38.25	1.25	2.49	0.62	1.87	11.02	8.52	1.66	1.66	0.62	0.62	0.42	10.81	0.83	0.62	3.33	0.83	0	0.62	0	2.91
S23	S2	HIV	2.26	0	3.4				0	1.51	6.26	2.09	2.31	0.88	5.93	37.1	13.28	0.99	3.18	0.33	0	2.41	12.62	0.77	2.2	0.33	0.55	0	0	0.11	0.88
S24	S2	HIV	1.79	3.32	1.66				0.33	0.53	0	0.44	2.22	5.78	5.78	0.89	0.44	2.22	0.44	8.89	5.33	5.33	3.56	23.11	2.22	0.44	0.44	0	1.78	0.89	0.89
S3	S2	HIV	2.77	0	15.53				1.63	2.87	0.14	0.28	3.73	8.99	18.95	0.28	1.24	5.53	0.28	4.7	3.6	3.73	2.49	16.87	0.69	2.35	0.28	0	0.55	0.55	1.66
S4	S2	HIV	NA	NA	NA				NA	NA	NA	NA	NA	NA	NA	NA	NA	NA	NA	NA	NA	NA	NA	NA	NA	NA	NA	NA	NA	NA	NA
S5	S2	HIV	1.65	0	2.96				0.33	0.55	1.22	10.59	4.64	0.17	7.09	3.94	8.57	2.54	0.79	0.09	0	0.52	1.66	0	8.84	1.75	7.7	3.24	0	5.25	7.52
S6	S2	HIV	NA	NA	NA				NA	NA	NA	NA	NA	NA	NA	NA	NA	NA	NA	NA	NA	NA	NA	NA	NA	NA	NA	NA	NA	NA	NA
S7	S2	HIV	6.09	13.28	3.18				0.28	0.28	2.54	13.25	3.9	0.82	4.9	4.85	5.04	3.86	0.41	0.27	0	0.95	1.27	0.27	7.12	2	5.22	4.26	0	6.22	6.94
S8	S2	HIV	3.09	0	12.52				3.18	5.17	0	0.72	7.14	12.01	2.8	0.52	1.97	1.24	0.93	4.45	9.21	14.29	3.62	18.84	2.17	2.17	0.21	0.1	0.41	0.41	1.76
S9	S2	HIV	6.53	7.51	0.99				0.12	2.22	0.12	0.99	9.24	11.58	2.71	0.62	0.86	0.49	1.11	1.35	15.52	18.47	2.59	12.07	1.23	1.48	0.25	0.25	0.12	0.25	1.23
