# Supplementary material for: Selective loss of CD107a TIGIT+ memory HIV-1-specific CD8+ T cells in PLWH over a decade of ART
Source: eLife. 2023 Sep 19;12:e83737. doi: 10.7554/eLife.83737 (PMC10508883; doi:10.7554/eLife.83737)
Supplement: Figure 4—source data 3. [file elife-83737-fig4-data3.xlsx]

## Sheet: HIV-1-specific CD8+ T cells
Patients	Group	Condition	Population	CD107a	IFNy	IL-2
EI1	Ei	HIV	total CD8+ T cells	0.145	0.055	0.13
EI10	Ei	HIV	total CD8+ T cells	7.2	5.255	4.615
EI11	Ei	HIV	total CD8+ T cells	NA	NA	NA
EI13	Ei	HIV	total CD8+ T cells	NA	NA	NA
EI16	Ei	HIV	total CD8+ T cells	1.165	0.525	0
EI17	Ei	HIV	total CD8+ T cells	1.09	1.1865	0.835
EI18	Ei	HIV	total CD8+ T cells	0.165	0.16	0.555
EI19	Ei	HIV	total CD8+ T cells	0.215	0.224	0.53
EI2	Ei	HIV	total CD8+ T cells	0	0	0
EI20	Ei	HIV	total CD8+ T cells	0.195	0.055	0
EI21	Ei	HIV	total CD8+ T cells	0.125	0.03	0.085
EI22	Ei	HIV	total CD8+ T cells	0.175	0	0
EI23	Ei	HIV	total CD8+ T cells	1.14	3.2315	4.58
EI24	Ei	HIV	total CD8+ T cells	0.1	0.113	0.785
EI3	Ei	HIV	total CD8+ T cells	0.18	0	0.1
EI4	Ei	HIV	total CD8+ T cells	0	0.09	0.365
EI5	Ei	HIV	total CD8+ T cells	1.635	0.48	0
EI6	Ei	HIV	total CD8+ T cells	1.19	0.72	0.87
EI7	Ei	HIV	total CD8+ T cells	0.67	1.565	5.33
EI8	Ei	HIV	total CD8+ T cells	NA	NA	NA
EI9	Ei	HIV	total CD8+ T cells	4.4	3.945	2.65
S1	S1	HIV	total CD8+ T cells	0.475	0.65	0.34
S10	S1	HIV	total CD8+ T cells	0	0.655	0.675
S12	S1	HIV	total CD8+ T cells	0.21	0.31	0.315
S13	S1	HIV	total CD8+ T cells	0.085	0.063	1.295
S16	S1	HIV	total CD8+ T cells	0.28	0.089	0
S19	S1	HIV	total CD8+ T cells	0.175	0.0645	0.3
S2	S1	HIV	total CD8+ T cells	0	0.025	0.68
S20	S1	HIV	total CD8+ T cells	0.015	0	0
S21	S1	HIV	total CD8+ T cells	0.02	0	0
S22	S1	HIV	total CD8+ T cells	0.485	0.48	0.14
S23	S1	HIV	total CD8+ T cells	0.21	0	0
S24	S1	HIV	total CD8+ T cells	0.02	0	0.525
S3	S1	HIV	total CD8+ T cells	1.905	1.495	0.34
S5	S1	HIV	total CD8+ T cells	0.64	0.01	0.3
S6	S1	HIV	total CD8+ T cells	0.13	0.085	0
S7	S1	HIV	total CD8+ T cells	0.2	0.17	0.525
S8	S1	HIV	total CD8+ T cells	0	0	0
S9	S1	HIV	total CD8+ T cells	0.075	0.265	1.005
S1	S2	HIV	total CD8+ T cells	0.39	0.555	0
S10	S2	HIV	total CD8+ T cells	0.31	0.165	0.16
S11	S2	HIV	total CD8+ T cells	4.455	2.91	2.56
S12	S2	HIV	total CD8+ T cells	0	0.325	0.215
S13	S2	HIV	total CD8+ T cells	0.335	0	1.345
S14	S2	HIV	total CD8+ T cells	0.03	0	0
S16	S2	HIV	total CD8+ T cells	0.145	0.015	0
S19	S2	HIV	total CD8+ T cells	0.02	0.055	0.4
S2	S2	HIV	total CD8+ T cells	0	0.275	0.335
S20	S2	HIV	total CD8+ T cells	0	0	0
S21	S2	HIV	total CD8+ T cells	0	0	0
S22	S2	HIV	total CD8+ T cells	0.555	0.645	0.175
S23	S2	HIV	total CD8+ T cells	0.015	0	0
S24	S2	HIV	total CD8+ T cells	0.075	0.0775	0.29
S3	S2	HIV	total CD8+ T cells	0.505	0.47	0.395
S4	S2	HIV	total CD8+ T cells	NA	NA	NA
S5	S2	HIV	total CD8+ T cells	0.605	0.275	0.62
S6	S2	HIV	total CD8+ T cells	0	0	0
S7	S2	HIV	total CD8+ T cells	0.69	0.045	0
S8	S2	HIV	total CD8+ T cells	0	0	0.1
S9	S2	HIV	total CD8+ T cells	0	0.28	0.495
EI1	Ei	HIV	Naive CD8+ T cells	0.05	0.115	0.4
EI10	Ei	HIV	Naive CD8+ T cells	0.685	0.84	9.94
EI11	Ei	HIV	Naive CD8+ T cells	NA	NA	NA
EI13	Ei	HIV	Naive CD8+ T cells	NA	NA	NA
EI16	Ei	HIV	Naive CD8+ T cells	0.1	0	0
EI17	Ei	HIV	Naive CD8+ T cells	0.1	0.16	1.485
EI18	Ei	HIV	Naive CD8+ T cells	0.015	0.0005	0.995
EI19	Ei	HIV	Naive CD8+ T cells	0.02	0	0.82
EI2	Ei	HIV	Naive CD8+ T cells	0	0	0
EI20	Ei	HIV	Naive CD8+ T cells	0.155	0.097	1.045
EI21	Ei	HIV	Naive CD8+ T cells	0.205	0	0
EI22	Ei	HIV	Naive CD8+ T cells	0.205	0	0
EI23	Ei	HIV	Naive CD8+ T cells	0.204	2.015	6.605
EI24	Ei	HIV	Naive CD8+ T cells	0	0.1	1.835
EI3	Ei	HIV	Naive CD8+ T cells	0.135	0	0.23
EI4	Ei	HIV	Naive CD8+ T cells	0	0.005	0.555
EI5	Ei	HIV	Naive CD8+ T cells	0.02	0	0
EI6	Ei	HIV	Naive CD8+ T cells	0.005	0.24	0.8
EI7	Ei	HIV	Naive CD8+ T cells	0.64	1.435	7.11
EI8	Ei	HIV	Naive CD8+ T cells	NA	NA	NA
EI9	Ei	HIV	Naive CD8+ T cells	0.445	1.395	6.22
S1	S1	HIV	Naive CD8+ T cells	0	0.22	0.42
S10	S1	HIV	Naive CD8+ T cells	0.21	1.44	1.93
S12	S1	HIV	Naive CD8+ T cells	0.535	0.205	0.29
S13	S1	HIV	Naive CD8+ T cells	0.14	0.005	1.94
S16	S1	HIV	Naive CD8+ T cells	0.035	0.17	0
S19	S1	HIV	Naive CD8+ T cells	0.375	0	0
S2	S1	HIV	Naive CD8+ T cells	0	0	0.755
S20	S1	HIV	Naive CD8+ T cells	0.005	0	0
S21	S1	HIV	Naive CD8+ T cells	0.31	0	0
S22	S1	HIV	Naive CD8+ T cells	0.06	0.05	0.28
S23	S1	HIV	Naive CD8+ T cells	0.435	0	0
S24	S1	HIV	Naive CD8+ T cells	0.015	0	0.6
S3	S1	HIV	Naive CD8+ T cells	0.775	0.31	0.415
S5	S1	HIV	Naive CD8+ T cells	0.45	0	0.17
S6	S1	HIV	Naive CD8+ T cells	0.079	0.035	0.07
S7	S1	HIV	Naive CD8+ T cells	0	0.26	0.105
S8	S1	HIV	Naive CD8+ T cells	0	0	0
S9	S1	HIV	Naive CD8+ T cells	0.13	0.59	1.645
S1	S2	HIV	Naive CD8+ T cells	0	0	0
S10	S2	HIV	Naive CD8+ T cells	0.945	0.249	0.275
S11	S2	HIV	Naive CD8+ T cells	1.925	0	2.575
S12	S2	HIV	Naive CD8+ T cells	0.65	0.615	0.71
S13	S2	HIV	Naive CD8+ T cells	0.53	0.054	2.575
S14	S2	HIV	Naive CD8+ T cells	0	0.015	0
S16	S2	HIV	Naive CD8+ T cells	0.995	0	0
S19	S2	HIV	Naive CD8+ T cells	0.06	0	0.575
S2	S2	HIV	Naive CD8+ T cells	0	0.325	0.485
S20	S2	HIV	Naive CD8+ T cells	0.0235	0	0.13
S21	S2	HIV	Naive CD8+ T cells	0.04	0	0
S22	S2	HIV	Naive CD8+ T cells	0.015	0.0015	0.045
S23	S2	HIV	Naive CD8+ T cells	0.105	0	0
S24	S2	HIV	Naive CD8+ T cells	0.065	0.051	0.615
S3	S2	HIV	Naive CD8+ T cells	0.209	0.355	0.4
S4	S2	HIV	Naive CD8+ T cells	NA	NA	NA
S5	S2	HIV	Naive CD8+ T cells	0.435	0.25	0.63
S6	S2	HIV	Naive CD8+ T cells	0	0	0
S7	S2	HIV	Naive CD8+ T cells	0	0.065	0.11
S8	S2	HIV	Naive CD8+ T cells	0	0.085	0.02
S9	S2	HIV	Naive CD8+ T cells	0	0.345	1.145
EI1	Ei	HIV	CM CD8+ T cells	0	0.015	0.13
EI10	Ei	HIV	CM CD8+ T cells	2.07	1.98	7.295
EI11	Ei	HIV	CM CD8+ T cells	NA	NA	NA
EI13	Ei	HIV	CM CD8+ T cells	NA	NA	NA
EI16	Ei	HIV	CM CD8+ T cells	0.745	0.257	0.42
EI17	Ei	HIV	CM CD8+ T cells	0.235	0.281	0.99
EI18	Ei	HIV	CM CD8+ T cells	0.085	0.08	0.35
EI19	Ei	HIV	CM CD8+ T cells	0.0665	0.0745	0.505
EI2	Ei	HIV	CM CD8+ T cells	0	0	0
EI20	Ei	HIV	CM CD8+ T cells	0.1205	0.03	0
EI21	Ei	HIV	CM CD8+ T cells	0.345	0	0.945
EI22	Ei	HIV	CM CD8+ T cells	0.535	0.035	0
EI23	Ei	HIV	CM CD8+ T cells	0.355	2.075	6.95
EI24	Ei	HIV	CM CD8+ T cells	0	0.055	2.07
EI3	Ei	HIV	CM CD8+ T cells	0.025	0	0
EI4	Ei	HIV	CM CD8+ T cells	0	0.005	0.42
EI5	Ei	HIV	CM CD8+ T cells	0.065	0	0
EI6	Ei	HIV	CM CD8+ T cells	0.35	0.655	1.365
EI7	Ei	HIV	CM CD8+ T cells	1.175	1.495	6.495
EI8	Ei	HIV	CM CD8+ T cells	NA	NA	NA
EI9	Ei	HIV	CM CD8+ T cells	0.56	1.135	6.98
S1	S1	HIV	CM CD8+ T cells	0.44	0.69	0.555
S10	S1	HIV	CM CD8+ T cells	0	0.915	1.3
S12	S1	HIV	CM CD8+ T cells	0.53	0.36	0.465
S13	S1	HIV	CM CD8+ T cells	0.14	0.384	2.255
S16	S1	HIV	CM CD8+ T cells	0.595	0	0
S19	S1	HIV	CM CD8+ T cells	0	0.02	0.39
S2	S1	HIV	CM CD8+ T cells	0.15	0	0.245
S20	S1	HIV	CM CD8+ T cells	0.08	0	0
S21	S1	HIV	CM CD8+ T cells	0	0	1.815
S22	S1	HIV	CM CD8+ T cells	0.0935	0	0
S23	S1	HIV	CM CD8+ T cells	0	0	0
S24	S1	HIV	CM CD8+ T cells	0.035	0	1.59
S3	S1	HIV	CM CD8+ T cells	2.285	1.71	2.015
S5	S1	HIV	CM CD8+ T cells	0.835	0.63	1.46
S6	S1	HIV	CM CD8+ T cells	0.13	0.27	0.245
S7	S1	HIV	CM CD8+ T cells	0	0.435	1.39
S8	S1	HIV	CM CD8+ T cells	0	0	0.065
S9	S1	HIV	CM CD8+ T cells	0.085	0.29	1.445
S1	S2	HIV	CM CD8+ T cells	0.4	0.6	0.12
S10	S2	HIV	CM CD8+ T cells	0	0	0.715
S11	S2	HIV	CM CD8+ T cells	2.635	1.28	2.045
S12	S2	HIV	CM CD8+ T cells	0	0.345	0.11
S13	S2	HIV	CM CD8+ T cells	0.41	0	2.375
S14	S2	HIV	CM CD8+ T cells	0	0	0
S16	S2	HIV	CM CD8+ T cells	0	0.055	0
S19	S2	HIV	CM CD8+ T cells	0	0	0.585
S2	S2	HIV	CM CD8+ T cells	0	0.245	0.3
S20	S2	HIV	CM CD8+ T cells	0.026	0	0
S21	S2	HIV	CM CD8+ T cells	0	0	0
S22	S2	HIV	CM CD8+ T cells	0	0.02	0
S23	S2	HIV	CM CD8+ T cells	0	0.395	0.415
S24	S2	HIV	CM CD8+ T cells	0.07	0.0615	0.795
S3	S2	HIV	CM CD8+ T cells	0.4135	0.55	0.62
S4	S2	HIV	CM CD8+ T cells	NA	NA	NA
S5	S2	HIV	CM CD8+ T cells	0.405	0.47	0.925
S6	S2	HIV	CM CD8+ T cells	0	0	0
S7	S2	HIV	CM CD8+ T cells	0.395	0.135	0.135
S8	S2	HIV	CM CD8+ T cells	0	0	0
S9	S2	HIV	CM CD8+ T cells	0	0.15	0.745
EI1	Ei	HIV	TM CD8+ T cells	0.195	0.14	0.145
EI10	Ei	HIV	TM CD8+ T cells	12.38	10.065	5.855
EI11	Ei	HIV	TM CD8+ T cells	NA	NA	NA
EI13	Ei	HIV	TM CD8+ T cells	NA	NA	NA
EI16	Ei	HIV	TM CD8+ T cells	3.075	1.886	0
EI17	Ei	HIV	TM CD8+ T cells	2.855	2.7895	1.32
EI18	Ei	HIV	TM CD8+ T cells	0.865	0.647	0.685
EI19	Ei	HIV	TM CD8+ T cells	1.025	1.0905	0.43
EI2	Ei	HIV	TM CD8+ T cells	0	0	0
EI20	Ei	HIV	TM CD8+ T cells	0.56	0.3	0.145
EI21	Ei	HIV	TM CD8+ T cells	0.17	0.0545	0.1
EI22	Ei	HIV	TM CD8+ T cells	0.14	0.16	0
EI23	Ei	HIV	TM CD8+ T cells	2.65	4.793	5.255
EI24	Ei	HIV	TM CD8+ T cells	0.175	0.36	0.895
EI3	Ei	HIV	TM CD8+ T cells	0.23	0.05	0.05
EI4	Ei	HIV	TM CD8+ T cells	0	0.145	0.27
EI5	Ei	HIV	TM CD8+ T cells	3.525	1.815	0
EI6	Ei	HIV	TM CD8+ T cells	1.69	0.865	0.44
EI7	Ei	HIV	TM CD8+ T cells	0.745	1.095	5.775
EI8	Ei	HIV	TM CD8+ T cells	NA	NA	NA
EI9	Ei	HIV	TM CD8+ T cells	8.945	6.96	4.695
S1	S1	HIV	TM CD8+ T cells	1	0.625	0.485
S10	S1	HIV	TM CD8+ T cells	0.06	1.63	2.035
S12	S1	HIV	TM CD8+ T cells	0.11	0.245	0.185
S13	S1	HIV	TM CD8+ T cells	0.09	0.065	1.155
S16	S1	HIV	TM CD8+ T cells	0.355	0.0815	0.18
S19	S1	HIV	TM CD8+ T cells	0.75	0.5045	0.805
S2	S1	HIV	TM CD8+ T cells	0.14	0.28	0.78
S20	S1	HIV	TM CD8+ T cells	0.05	0	0
S21	S1	HIV	TM CD8+ T cells	0.09	0	0
S22	S1	HIV	TM CD8+ T cells	2.31	2.845	0.4
S23	S1	HIV	TM CD8+ T cells	0	0	0
S24	S1	HIV	TM CD8+ T cells	0.235	0	0.425
S3	S1	HIV	TM CD8+ T cells	4.655	2.98	1.625
S5	S1	HIV	TM CD8+ T cells	1.075	0.195	0.48
S6	S1	HIV	TM CD8+ T cells	0.455	0.085	0.025
S7	S1	HIV	TM CD8+ T cells	1.095	0.775	1.365
S8	S1	HIV	TM CD8+ T cells	0	0	0
S9	S1	HIV	TM CD8+ T cells	0.07	0.17	1.19
S1	S2	HIV	TM CD8+ T cells	1.12	0.815	0
S10	S2	HIV	TM CD8+ T cells	0.62	0.735	0.9
S11	S2	HIV	TM CD8+ T cells	8.14	5.785	5.65
S12	S2	HIV	TM CD8+ T cells	0	0.38	0.215
S13	S2	HIV	TM CD8+ T cells	0.025	0.38	1.515
S14	S2	HIV	TM CD8+ T cells	0.585	0.005	0
S16	S2	HIV	TM CD8+ T cells	0.71	0.14	0
S19	S2	HIV	TM CD8+ T cells	0.01	0.3895	0.43
S2	S2	HIV	TM CD8+ T cells	0.085	0.18	0.305
S20	S2	HIV	TM CD8+ T cells	0.0055	0.0125	0
S21	S2	HIV	TM CD8+ T cells	0.007	0	0
S22	S2	HIV	TM CD8+ T cells	2.3035	2.755	0.84
S23	S2	HIV	TM CD8+ T cells	0.195	0	0
S24	S2	HIV	TM CD8+ T cells	0.095	0.151	0.125
S3	S2	HIV	TM CD8+ T cells	1.355	0.965	0.455
S4	S2	HIV	TM CD8+ T cells	NA	NA	NA
S5	S2	HIV	TM CD8+ T cells	0.91	0.43	0.615
S6	S2	HIV	TM CD8+ T cells	0.135	0	0
S7	S2	HIV	TM CD8+ T cells	1.365	0.075	0.61
S8	S2	HIV	TM CD8+ T cells	0	0	0
S9	S2	HIV	TM CD8+ T cells	0	0.22	0.19
EI1	Ei	HIV	EM CD8+ T cells	0	0.0975	0.0895
EI10	Ei	HIV	EM CD8+ T cells	7.555	6.88	3.085
EI11	Ei	HIV	EM CD8+ T cells	NA	NA	NA
EI13	Ei	HIV	EM CD8+ T cells	NA	NA	NA
EI16	Ei	HIV	EM CD8+ T cells	0.44	0.05	0
EI17	Ei	HIV	EM CD8+ T cells	0.13	0.255	0.335
EI18	Ei	HIV	EM CD8+ T cells	0	0.015	0.08
EI19	Ei	HIV	EM CD8+ T cells	0.219	0.1175	0.1055
EI2	Ei	HIV	EM CD8+ T cells	0	0	0
EI20	Ei	HIV	EM CD8+ T cells	0.2155	0.035	0.02
EI21	Ei	HIV	EM CD8+ T cells	0.065	0.0395	0
EI22	Ei	HIV	EM CD8+ T cells	0.16	0	0
EI23	Ei	HIV	EM CD8+ T cells	0.13	2.41967	3.73
EI24	Ei	HIV	EM CD8+ T cells	0.15	0.07	0.385
EI3	Ei	HIV	EM CD8+ T cells	0.12	0.125	0.1205
EI4	Ei	HIV	EM CD8+ T cells	0	0.13	0.32
EI5	Ei	HIV	EM CD8+ T cells	1.3	0.435	0
EI6	Ei	HIV	EM CD8+ T cells	0.335	0.1785	0.155
EI7	Ei	HIV	EM CD8+ T cells	0.47	0.902	3.905
EI8	Ei	HIV	EM CD8+ T cells	NA	NA	NA
EI9	Ei	HIV	EM CD8+ T cells	4.96	4.9	2.095
S1	S1	HIV	EM CD8+ T cells	1.65	1.181	0.29
S10	S1	HIV	EM CD8+ T cells	0.1	0.455	0.19
S12	S1	HIV	EM CD8+ T cells	0.095	0.345	0.235
S13	S1	HIV	EM CD8+ T cells	0.04	0.0375	0.14
S16	S1	HIV	EM CD8+ T cells	0.165	0.0285	0
S19	S1	HIV	EM CD8+ T cells	0.18	0.275	0.08
S2	S1	HIV	EM CD8+ T cells	0	0.425	0.71
S20	S1	HIV	EM CD8+ T cells	0	0.1645	0.14
S21	S1	HIV	EM CD8+ T cells	0.3435	0	0
S22	S1	HIV	EM CD8+ T cells	0.1725	0.1	0
S23	S1	HIV	EM CD8+ T cells	1.94	0	1.215
S24	S1	HIV	EM CD8+ T cells	0.02	0	0.05
S3	S1	HIV	EM CD8+ T cells	2.305	1.94	0.335
S5	S1	HIV	EM CD8+ T cells	0.345	0.62	0.38
S6	S1	HIV	EM CD8+ T cells	0.085	0.035	0.115
S7	S1	HIV	EM CD8+ T cells	0.405	0.065	0.065
S8	S1	HIV	EM CD8+ T cells	0	0	0
S9	S1	HIV	EM CD8+ T cells	0.02	0.155	0.26
S1	S2	HIV	EM CD8+ T cells	0.515	0.545	0.1585
S10	S2	HIV	EM CD8+ T cells	0.36	0.1155	0.12
S11	S2	HIV	EM CD8+ T cells	3.835	3.575	3.255
S12	S2	HIV	EM CD8+ T cells	0	0.35	0.225
S13	S2	HIV	EM CD8+ T cells	0.43	0.045	1.375
S14	S2	HIV	EM CD8+ T cells	0.03	0	0
S16	S2	HIV	EM CD8+ T cells	0.45	0.07	0.32
S19	S2	HIV	EM CD8+ T cells	0.285	0.111	0.102
S2	S2	HIV	EM CD8+ T cells	0.08	0.27	0.09
S20	S2	HIV	EM CD8+ T cells	0	0	0.015
S21	S2	HIV	EM CD8+ T cells	0	0	0
S22	S2	HIV	EM CD8+ T cells	0.124	0.1445	0.025
S23	S2	HIV	EM CD8+ T cells	0	0	0
S24	S2	HIV	EM CD8+ T cells	0.145	0.0925	0.045
S3	S2	HIV	EM CD8+ T cells	0.71	0.735	0.21
S4	S2	HIV	EM CD8+ T cells	NA	NA	NA
S5	S2	HIV	EM CD8+ T cells	0.64	1.03	0.745
S6	S2	HIV	EM CD8+ T cells	0	0	0
S7	S2	HIV	EM CD8+ T cells	1.17	0.072	0
S8	S2	HIV	EM CD8+ T cells	0	0.015	0.205
S9	S2	HIV	EM CD8+ T cells	0.09	0.12	0.135
EI1	Ei	HIV	Effector CD8+ T cells	0.685	0	0
EI10	Ei	HIV	Effector CD8+ T cells	23.32	10.045	2.94
EI11	Ei	HIV	Effector CD8+ T cells	NA	NA	NA
EI13	Ei	HIV	Effector CD8+ T cells	NA	NA	NA
EI16	Ei	HIV	Effector CD8+ T cells	0.775	0.2865	0
EI17	Ei	HIV	Effector CD8+ T cells	0.03	0.2375	0.38
EI18	Ei	HIV	Effector CD8+ T cells	0.0925	0.13	0.185
EI19	Ei	HIV	Effector CD8+ T cells	0	0.0395	0.03
EI2	Ei	HIV	Effector CD8+ T cells	0	0	0
EI20	Ei	HIV	Effector CD8+ T cells	0.045	0.012	0
EI21	Ei	HIV	Effector CD8+ T cells	0.245	0.085	0
EI22	Ei	HIV	Effector CD8+ T cells	0.25	0	0
EI23	Ei	HIV	Effector CD8+ T cells	0.41	2.1575	4.21
EI24	Ei	HIV	Effector CD8+ T cells	0	0	0.36
EI3	Ei	HIV	Effector CD8+ T cells	0.21	0	0.305
EI4	Ei	HIV	Effector CD8+ T cells	0	0	0.31
EI5	Ei	HIV	Effector CD8+ T cells	2.175	1.125	0
EI6	Ei	HIV	Effector CD8+ T cells	0.935	0.411	0.045
EI7	Ei	HIV	Effector CD8+ T cells	0.54	0.215	3.685
EI8	Ei	HIV	Effector CD8+ T cells	NA	NA	NA
EI9	Ei	HIV	Effector CD8+ T cells	2.075	1.903	1.47
S1	S1	HIV	Effector CD8+ T cells	1.455	1.66	0.365
S10	S1	HIV	Effector CD8+ T cells	0.54	0.655	1.235
S12	S1	HIV	Effector CD8+ T cells	0.3	0.39	0.325
S13	S1	HIV	Effector CD8+ T cells	0.035	0.0775	0.145
S16	S1	HIV	Effector CD8+ T cells	0.05	0.145	0.545
S19	S1	HIV	Effector CD8+ T cells	0.03	0.06	0.425
S2	S1	HIV	Effector CD8+ T cells	0.03	0.44	0.95
S20	S1	HIV	Effector CD8+ T cells	0.14	0.21	0.315
S21	S1	HIV	Effector CD8+ T cells	0	0	0
S22	S1	HIV	Effector CD8+ T cells	0.0475	0	0
S23	S1	HIV	Effector CD8+ T cells	0.41	0	0
S24	S1	HIV	Effector CD8+ T cells	0.175	0	0.29
S3	S1	HIV	Effector CD8+ T cells	2.125	1.73	0.22
S5	S1	HIV	Effector CD8+ T cells	1.425	0	0.24
S6	S1	HIV	Effector CD8+ T cells	0.08	0.27	0
S7	S1	HIV	Effector CD8+ T cells	0.28	0.18	0.225
S8	S1	HIV	Effector CD8+ T cells	0	0	0
S9	S1	HIV	Effector CD8+ T cells	0.265	0.16	0.245
S1	S2	HIV	Effector CD8+ T cells	0.915	0.745	0.08
S10	S2	HIV	Effector CD8+ T cells	0	0.215	0.1035
S11	S2	HIV	Effector CD8+ T cells	7.05	6.885	2.23
S12	S2	HIV	Effector CD8+ T cells	0	0.38	0.465
S13	S2	HIV	Effector CD8+ T cells	0.925	0.165	1.675
S14	S2	HIV	Effector CD8+ T cells	0	0	0.19
S16	S2	HIV	Effector CD8+ T cells	0.455	0	1.04
S19	S2	HIV	Effector CD8+ T cells	0.025	0.013	0.096
S2	S2	HIV	Effector CD8+ T cells	0.135	0.745	0.835
S20	S2	HIV	Effector CD8+ T cells	0.009	0	0
S21	S2	HIV	Effector CD8+ T cells	0.03	0	0
S22	S2	HIV	Effector CD8+ T cells	0.015	0	0.01
S23	S2	HIV	Effector CD8+ T cells	0	0	0
S24	S2	HIV	Effector CD8+ T cells	0.045	0.086	0
S3	S2	HIV	Effector CD8+ T cells	0.51	0.46	0.165
S4	S2	HIV	Effector CD8+ T cells	NA	NA	NA
S5	S2	HIV	Effector CD8+ T cells	1.9	0.83	0.81
S6	S2	HIV	Effector CD8+ T cells	0	0	0
S7	S2	HIV	Effector CD8+ T cells	0.62	0	0.1705
S8	S2	HIV	Effector CD8+ T cells	0	0	0.345
S9	S2	HIV	Effector CD8+ T cells	0.095	0.155	0.245
