# Supplementary material for: Selective loss of CD107a TIGIT+ memory HIV-1-specific CD8+ T cells in PLWH over a decade of ART
Source: eLife. 2023 Sep 19;12:e83737. doi: 10.7554/eLife.83737 (PMC10508883; doi:10.7554/eLife.83737)
Supplement: Figure 4—source data 4. [file elife-83737-fig4-data4.xlsx]

## Sheet: Functionality TIGIT 
Patients	Group	Condition	Population	CD107a	IFNy	IL-2
EI1	Ei	HIV	TIGIT CM CD8+ T cells	0	0.242	0.715
EI10	Ei	HIV	TIGIT CM CD8+ T cells	3.3	3.945	11.68
EI11	Ei	HIV	TIGIT CM CD8+ T cells	NA	NA	NA
EI13	Ei	HIV	TIGIT CM CD8+ T cells	NA	NA	NA
EI16	Ei	HIV	TIGIT CM CD8+ T cells	1.46	0.542	0.675
EI17	Ei	HIV	TIGIT CM CD8+ T cells	0.465	0.445	1.31
EI18	Ei	HIV	TIGIT CM CD8+ T cells	0.45	0.15	0
EI19	Ei	HIV	TIGIT CM CD8+ T cells	0.1005	0.204	0.59
EI2	Ei	HIV	TIGIT CM CD8+ T cells	0	0	0
EI20	Ei	HIV	TIGIT CM CD8+ T cells	0.139	0.1865	0
EI21	Ei	HIV	TIGIT CM CD8+ T cells	0.17	0	1.005
EI22	Ei	HIV	TIGIT CM CD8+ T cells	0.605	0.14	0
EI23	Ei	HIV	TIGIT CM CD8+ T cells	0.55	2.475	13.415
EI24	Ei	HIV	TIGIT CM CD8+ T cells	0.59	0	2.105
EI3	Ei	HIV	TIGIT CM CD8+ T cells	0.04	0	0
EI4	Ei	HIV	TIGIT CM CD8+ T cells	0	0	0
EI5	Ei	HIV	TIGIT CM CD8+ T cells	0.67	0	0
EI6	Ei	HIV	TIGIT CM CD8+ T cells	0.375	0.39	1.62
EI7	Ei	HIV	TIGIT CM CD8+ T cells	1.17	2.23	7.525
EI8	Ei	HIV	TIGIT CM CD8+ T cells	NA	NA	NA
EI9	Ei	HIV	TIGIT CM CD8+ T cells	0.98	2.195	6.635
S1	S1	HIV	TIGIT CM CD8+ T cells	0.745	0.845	0.615
S10	S1	HIV	TIGIT CM CD8+ T cells	0.085	4.115	2.405
S12	S1	HIV	TIGIT CM CD8+ T cells	0.845	0.72	0.71
S13	S1	HIV	TIGIT CM CD8+ T cells	0.08	0.5665	1.88
S16	S1	HIV	TIGIT CM CD8+ T cells	1.065	0	0
S19	S1	HIV	TIGIT CM CD8+ T cells	0	0.08	0.21
S2	S1	HIV	TIGIT CM CD8+ T cells	0.18	0	0.42
S20	S1	HIV	TIGIT CM CD8+ T cells	0.265	0	0
S21	S1	HIV	TIGIT CM CD8+ T cells	0	0	3.81
S22	S1	HIV	TIGIT CM CD8+ T cells	0.24	0	0.395
S23	S1	HIV	TIGIT CM CD8+ T cells	0	0	0
S24	S1	HIV	TIGIT CM CD8+ T cells	0	0	0.115
S3	S1	HIV	TIGIT CM CD8+ T cells	3.405	1.82	1.585
S5	S1	HIV	TIGIT CM CD8+ T cells	0.97	0.92	1.46
S6	S1	HIV	TIGIT CM CD8+ T cells	0.09	0.665	0.335
S7	S1	HIV	TIGIT CM CD8+ T cells	0	0.265	0.76
S8	S1	HIV	TIGIT CM CD8+ T cells	0	0	0.12
S9	S1	HIV	TIGIT CM CD8+ T cells	0.11	0.46	2.235
S1	S2	HIV	TIGIT CM CD8+ T cells	0.395	0.465	0
S10	S2	HIV	TIGIT CM CD8+ T cells	0	0.235	0.925
S11	S2	HIV	TIGIT CM CD8+ T cells	2.3	1.215	1.59
S12	S2	HIV	TIGIT CM CD8+ T cells	0	0.18	0
S13	S2	HIV	TIGIT CM CD8+ T cells	0.65	0	3.05
S14	S2	HIV	TIGIT CM CD8+ T cells	0	0.045	0
S16	S2	HIV	TIGIT CM CD8+ T cells	0.06	0.225	0
S19	S2	HIV	TIGIT CM CD8+ T cells	0	0	0.5
S2	S2	HIV	TIGIT CM CD8+ T cells	0	0.73	0.995
S20	S2	HIV	TIGIT CM CD8+ T cells	0.07	0	0.03
S21	S2	HIV	TIGIT CM CD8+ T cells	0	0	0
S22	S2	HIV	TIGIT CM CD8+ T cells	0.025	0.0935	0
S23	S2	HIV	TIGIT CM CD8+ T cells	0	0.515	0.775
S24	S2	HIV	TIGIT CM CD8+ T cells	0.05	0.025	0.265
S3	S2	HIV	TIGIT CM CD8+ T cells	0.4815	0.605	0.385
S4	S2	HIV	TIGIT CM CD8+ T cells	NA	NA	NA
S5	S2	HIV	TIGIT CM CD8+ T cells	0.155	0	0.555
S6	S2	HIV	TIGIT CM CD8+ T cells	0	0	0
S7	S2	HIV	TIGIT CM CD8+ T cells	0.505	0.245	0.215
S8	S2	HIV	TIGIT CM CD8+ T cells	0	0	0
S9	S2	HIV	TIGIT CM CD8+ T cells	0	0.065	0
EI1	Ei	HIV	TIGIT TM CD8+ T cells	0.24	0.24	0.22
EI10	Ei	HIV	TIGIT TM CD8+ T cells	13.95	10.935	5.635
EI11	Ei	HIV	TIGIT TM CD8+ T cells
EI13	Ei	HIV	TIGIT TM CD8+ T cells
EI16	Ei	HIV	TIGIT TM CD8+ T cells	3.94	2.4725	0.045
EI17	Ei	HIV	TIGIT TM CD8+ T cells	3.66	3.539	1.555
EI18	Ei	HIV	TIGIT TM CD8+ T cells	0.925	0.721	0.79
EI19	Ei	HIV	TIGIT TM CD8+ T cells	1.39	1.5255	0.43
EI2	Ei	HIV	TIGIT TM CD8+ T cells	0	0	0
EI20	Ei	HIV	TIGIT TM CD8+ T cells	0.781	0.42	0.13
EI21	Ei	HIV	TIGIT TM CD8+ T cells	0.165	0.035	0.105
EI22	Ei	HIV	TIGIT TM CD8+ T cells	0.17	0.19	0
EI23	Ei	HIV	TIGIT TM CD8+ T cells	2.975	5.056	5.345
EI24	Ei	HIV	TIGIT TM CD8+ T cells	0.225	0.33	0.84
EI3	Ei	HIV	TIGIT TM CD8+ T cells	0.22	0.04	0.035
EI4	Ei	HIV	TIGIT TM CD8+ T cells	0	0.22	0.305
EI5	Ei	HIV	TIGIT TM CD8+ T cells	5.335	3.495	0.155
EI6	Ei	HIV	TIGIT TM CD8+ T cells	2.215	1.21	0.585
EI7	Ei	HIV	TIGIT TM CD8+ T cells	0.895	1.39	6.775
EI8	Ei	HIV	TIGIT TM CD8+ T cells	NA	NA	NA
EI9	Ei	HIV	TIGIT TM CD8+ T cells	9.155	7.06	3.94
S1	S1	HIV	TIGIT TM CD8+ T cells	1.203	0.635	0.45
S10	S1	HIV	TIGIT TM CD8+ T cells	0	1.825	2.095
S12	S1	HIV	TIGIT TM CD8+ T cells	0.305	0.27	0.205
S13	S1	HIV	TIGIT TM CD8+ T cells	0.12	0.06	1.27
S16	S1	HIV	TIGIT TM CD8+ T cells	0.4	0.2	0.31
S19	S1	HIV	TIGIT TM CD8+ T cells	0.88	0.645	0.03
S2	S1	HIV	TIGIT TM CD8+ T cells	0.175	0.135	0.645
S20	S1	HIV	TIGIT TM CD8+ T cells	0.0655	0	0
S21	S1	HIV	TIGIT TM CD8+ T cells	0.015	0	0
S22	S1	HIV	TIGIT TM CD8+ T cells	2.835	3.455	0.525
S23	S1	HIV	TIGIT TM CD8+ T cells	0	0	0
S24	S1	HIV	TIGIT TM CD8+ T cells	0.18	0	0.525
S3	S1	HIV	TIGIT TM CD8+ T cells	5.275	3.32	1.57
S5	S1	HIV	TIGIT TM CD8+ T cells	1.23	0.245	0.29
S6	S1	HIV	TIGIT TM CD8+ T cells	0.5	0.05	0.075
S7	S1	HIV	TIGIT TM CD8+ T cells	0.665	0.875	0.975
S8	S1	HIV	TIGIT TM CD8+ T cells	0	0	0
S9	S1	HIV	TIGIT TM CD8+ T cells	0.215	0.195	1.19
S1	S2	HIV	TIGIT TM CD8+ T cells	1.2355	1.09	0.045
S10	S2	HIV	TIGIT TM CD8+ T cells	1.82	1.04	0.97
S11	S2	HIV	TIGIT TM CD8+ T cells	7.645	5.57	5.035
S12	S2	HIV	TIGIT TM CD8+ T cells	0	0.455	0.18
S13	S2	HIV	TIGIT TM CD8+ T cells	0.025	0.63	1.65
S14	S2	HIV	TIGIT TM CD8+ T cells	0.665	0.03	0
S16	S2	HIV	TIGIT TM CD8+ T cells	1.185	0.355	0
S19	S2	HIV	TIGIT TM CD8+ T cells	0.25	0.59	0.525
S2	S2	HIV	TIGIT TM CD8+ T cells	0.135	0	0.26
S20	S2	HIV	TIGIT TM CD8+ T cells	0.029	0.0295	0
S21	S2	HIV	TIGIT TM CD8+ T cells	0	0	0
S22	S2	HIV	TIGIT TM CD8+ T cells	2.981	3.54	1.055
S23	S2	HIV	TIGIT TM CD8+ T cells	0.055	0.585	0
S24	S2	HIV	TIGIT TM CD8+ T cells	0.165	0.1595	0.195
S3	S2	HIV	TIGIT TM CD8+ T cells	1.445	0.98	0.44
S4	S2	HIV	TIGIT TM CD8+ T cells
S5	S2	HIV	TIGIT TM CD8+ T cells	1.32	0.5315	0.885
S6	S2	HIV	TIGIT TM CD8+ T cells	0.125	0	0
S7	S2	HIV	TIGIT TM CD8+ T cells	1.61	0.07	0.57
S8	S2	HIV	TIGIT TM CD8+ T cells	0	0	0
S9	S2	HIV	TIGIT TM CD8+ T cells	0.175	0.17	0.125
EI1	Ei	HIV	TIGIT EM CD8+ T cells	0	0.105	0.1005
EI10	Ei	HIV	TIGIT EM CD8+ T cells	7.235	6.225	2.69
EI11	Ei	HIV	TIGIT EM CD8+ T cells
EI13	Ei	HIV	TIGIT EM CD8+ T cells
EI16	Ei	HIV	TIGIT EM CD8+ T cells	0.625	0.175	0
EI17	Ei	HIV	TIGIT EM CD8+ T cells	0.258	0.347	0.31
EI18	Ei	HIV	TIGIT EM CD8+ T cells	0.01	0	0.13
EI19	Ei	HIV	TIGIT EM CD8+ T cells	0.306	0.21	0.02
EI2	Ei	HIV	TIGIT EM CD8+ T cells	0	0	0
EI20	Ei	HIV	TIGIT EM CD8+ T cells	0.402	0.12	0
EI21	Ei	HIV	TIGIT EM CD8+ T cells	0.065	0.019	0.05
EI22	Ei	HIV	TIGIT EM CD8+ T cells	0.195	0	0
EI23	Ei	HIV	TIGIT EM CD8+ T cells	0.425	2.6675	4.03
EI24	Ei	HIV	TIGIT EM CD8+ T cells	0.095	0.08	0.36
EI3	Ei	HIV	TIGIT EM CD8+ T cells	0.1415	0.11	0.017
EI4	Ei	HIV	TIGIT EM CD8+ T cells	0	0.1865	0.325
EI5	Ei	HIV	TIGIT EM CD8+ T cells	3.555	3.355	0
EI6	Ei	HIV	TIGIT EM CD8+ T cells	0.565	0.375	0.265
EI7	Ei	HIV	TIGIT EM CD8+ T cells	0.29	1.023	3.925
EI8	Ei	HIV	TIGIT EM CD8+ T cells	NA	NA	NA
EI9	Ei	HIV	TIGIT EM CD8+ T cells	5.45	5.122	1.945
S1	S1	HIV	TIGIT EM CD8+ T cells	1.56	1.085	0.37
S10	S1	HIV	TIGIT EM CD8+ T cells	0.155	1.1	0.825
S12	S1	HIV	TIGIT EM CD8+ T cells	0.135	0.46	0.225
S13	S1	HIV	TIGIT EM CD8+ T cells	0	0.019	0.06
S16	S1	HIV	TIGIT EM CD8+ T cells	0	0.065	0
S19	S1	HIV	TIGIT EM CD8+ T cells	0.3	0.195	0.195
S2	S1	HIV	TIGIT EM CD8+ T cells	0	0.57	0.76
S20	S1	HIV	TIGIT EM CD8+ T cells	0	0.1305	0.08
S21	S1	HIV	TIGIT EM CD8+ T cells	0	0	0.195
S22	S1	HIV	TIGIT EM CD8+ T cells	0.236	0.24	0
S23	S1	HIV	TIGIT EM CD8+ T cells	4.285	0	0.665
S24	S1	HIV	TIGIT EM CD8+ T cells	0.22	0.12	0
S3	S1	HIV	TIGIT EM CD8+ T cells	3.445	2.505	0.42
S5	S1	HIV	TIGIT EM CD8+ T cells	0.4	0.65	0.515
S6	S1	HIV	TIGIT EM CD8+ T cells	0.13	0.07	0.03
S7	S1	HIV	TIGIT EM CD8+ T cells	0.395	0.085	0.02
S8	S1	HIV	TIGIT EM CD8+ T cells	0	0	0
S9	S1	HIV	TIGIT EM CD8+ T cells	0.02	0.17	0.235
S1	S2	HIV	TIGIT EM CD8+ T cells	0.545	0.4695	0.17
S10	S2	HIV	TIGIT EM CD8+ T cells	0	0.205	0.295
S11	S2	HIV	TIGIT EM CD8+ T cells	3.075	2.895	2.285
S12	S2	HIV	TIGIT EM CD8+ T cells	0	0.445	0.21
S13	S2	HIV	TIGIT EM CD8+ T cells	0.695	0.11	1.44
S14	S2	HIV	TIGIT EM CD8+ T cells	0.05	0	0
S16	S2	HIV	TIGIT EM CD8+ T cells	0.675	0.095	0.71
S19	S2	HIV	TIGIT EM CD8+ T cells	0.31	0.09	0.13
S2	S2	HIV	TIGIT EM CD8+ T cells	0.11	0.17	0.15
S20	S2	HIV	TIGIT EM CD8+ T cells	0	0	0.025
S21	S2	HIV	TIGIT EM CD8+ T cells	0.0375	0	0
S22	S2	HIV	TIGIT EM CD8+ T cells	0.1655	0.1965	0.045
S23	S2	HIV	TIGIT EM CD8+ T cells	0	0	0
S24	S2	HIV	TIGIT EM CD8+ T cells	0.125	0.1395	0.005
S3	S2	HIV	TIGIT EM CD8+ T cells	0.765	0.77	0.28
S4	S2	HIV	TIGIT EM CD8+ T cells	NA	NA	NA
S5	S2	HIV	TIGIT EM CD8+ T cells	0.845	1.07	0.75
S6	S2	HIV	TIGIT EM CD8+ T cells	0	0	0
S7	S2	HIV	TIGIT EM CD8+ T cells	0.955	0	0
S8	S2	HIV	TIGIT EM CD8+ T cells	0	0.16	0.18
S9	S2	HIV	TIGIT EM CD8+ T cells	0	0	0.305

## Sheet: Functionality TIGIT-TIM-3
Patients	Group	Condition	Population	CD107a	IFNy	IL-2
EI1	Ei	HIV	TIGIT+TIM-3 CM CD8+ T cells	0	0	0
EI10	Ei	HIV	TIGIT+TIM-3 CM CD8+ T cells	0	0	0
EI11	Ei	HIV	TIGIT+TIM-3 CM CD8+ T cells
EI13	Ei	HIV	TIGIT+TIM-3 CM CD8+ T cells
EI16	Ei	HIV	TIGIT+TIM-3 CM CD8+ T cells	3.845	3.845	3.845
EI17	Ei	HIV	TIGIT+TIM-3 CM CD8+ T cells	6.25	0	0
EI18	Ei	HIV	TIGIT+TIM-3 CM CD8+ T cells	0	0	8.35
EI19	Ei	HIV	TIGIT+TIM-3 CM CD8+ T cells	0.255	0	1.555
EI2	Ei	HIV	TIGIT+TIM-3 CM CD8+ T cells	0	0	0
EI20	Ei	HIV	TIGIT+TIM-3 CM CD8+ T cells	0	0	0
EI21	Ei	HIV	TIGIT+TIM-3 CM CD8+ T cells	0	0	0
EI22	Ei	HIV	TIGIT+TIM-3 CM CD8+ T cells	0	0	0
EI23	Ei	HIV	TIGIT+TIM-3 CM CD8+ T cells	0	0	0
EI24	Ei	HIV	TIGIT+TIM-3 CM CD8+ T cells	0	0	0
EI3	Ei	HIV	TIGIT+TIM-3 CM CD8+ T cells	0	0	0
EI4	Ei	HIV	TIGIT+TIM-3 CM CD8+ T cells	0	0	0
EI5	Ei	HIV	TIGIT+TIM-3 CM CD8+ T cells	0	0	0
EI6	Ei	HIV	TIGIT+TIM-3 CM CD8+ T cells	0	0	0
EI7	Ei	HIV	TIGIT+TIM-3 CM CD8+ T cells	0	0	9.1
EI8	Ei	HIV	TIGIT+TIM-3 CM CD8+ T cells	0	0	0
EI9	Ei	HIV	TIGIT+TIM-3 CM CD8+ T cells	0	0	0
S1	S1	HIV	TIGIT+TIM-3 CM CD8+ T cells	3.335	1.925	0
S10	S1	HIV	TIGIT+TIM-3 CM CD8+ T cells	0	0	0
S12	S1	HIV	TIGIT+TIM-3 CM CD8+ T cells	0.9	1.85	1.85
S13	S1	HIV	TIGIT+TIM-3 CM CD8+ T cells	0	0	4.545
S16	S1	HIV	TIGIT+TIM-3 CM CD8+ T cells	0	0	0
S19	S1	HIV	TIGIT+TIM-3 CM CD8+ T cells	0	0	0
S2	S1	HIV	TIGIT+TIM-3 CM CD8+ T cells	0	0	2.38
S20	S1	HIV	TIGIT+TIM-3 CM CD8+ T cells	0	0	0
S21	S1	HIV	TIGIT+TIM-3 CM CD8+ T cells	0	0	0
S22	S1	HIV	TIGIT+TIM-3 CM CD8+ T cells	0	0	0
S23	S1	HIV	TIGIT+TIM-3 CM CD8+ T cells	0	0	0
S24	S1	HIV	TIGIT+TIM-3 CM CD8+ T cells	0	0	0
S3	S1	HIV	TIGIT+TIM-3 CM CD8+ T cells	0	0	0
S5	S1	HIV	TIGIT+TIM-3 CM CD8+ T cells	0	0	0
S6	S1	HIV	TIGIT+TIM-3 CM CD8+ T cells	0	0	0
S7	S1	HIV	TIGIT+TIM-3 CM CD8+ T cells	0	0	0
S8	S1	HIV	TIGIT+TIM-3 CM CD8+ T cells	0	0	0
S9	S1	HIV	TIGIT+TIM-3 CM CD8+ T cells	0	0	3.845
S1	S2	HIV	TIGIT+TIM-3 CM CD8+ T cells	0	0	0.595
S10	S2	HIV	TIGIT+TIM-3 CM CD8+ T cells	0	0	0
S11	S2	HIV	TIGIT+TIM-3 CM CD8+ T cells	3.57	0	0
S12	S2	HIV	TIGIT+TIM-3 CM CD8+ T cells	0	0	0.95
S13	S2	HIV	TIGIT+TIM-3 CM CD8+ T cells	0	0	0
S14	S2	HIV	TIGIT+TIM-3 CM CD8+ T cells	0	0	7.02
S16	S2	HIV	TIGIT+TIM-3 CM CD8+ T cells	0	0	0
S19	S2	HIV	TIGIT+TIM-3 CM CD8+ T cells	0	0	1.5
S2	S2	HIV	TIGIT+TIM-3 CM CD8+ T cells	0	0	0
S20	S2	HIV	TIGIT+TIM-3 CM CD8+ T cells	0	0	5.775
S21	S2	HIV	TIGIT+TIM-3 CM CD8+ T cells	0	0	7.15
S22	S2	HIV	TIGIT+TIM-3 CM CD8+ T cells	0.96	1	6.075
S23	S2	HIV	TIGIT+TIM-3 CM CD8+ T cells	0	0	0
S24	S2	HIV	TIGIT+TIM-3 CM CD8+ T cells	0	0	0
S3	S2	HIV	TIGIT+TIM-3 CM CD8+ T cells	1.165	1.165	0
S4	S2	HIV	TIGIT+TIM-3 CM CD8+ T cells
S5	S2	HIV	TIGIT+TIM-3 CM CD8+ T cells	0	0	3.335
S6	S2	HIV	TIGIT+TIM-3 CM CD8+ T cells	2.04	0	0
S7	S2	HIV	TIGIT+TIM-3 CM CD8+ T cells	0	0	0
S8	S2	HIV	TIGIT+TIM-3 CM CD8+ T cells	1.925	0	0
S9	S2	HIV	TIGIT+TIM-3 CM CD8+ T cells	0	0	0
EI1	Ei	HIV	TIGIT+TIM-3 TM CD8+ T cells	2.5	0	0
EI10	Ei	HIV	TIGIT+TIM-3 TM CD8+ T cells	0	9.1	0
EI11	Ei	HIV	TIGIT+TIM-3 TM CD8+ T cells
EI13	Ei	HIV	TIGIT+TIM-3 TM CD8+ T cells
EI16	Ei	HIV	TIGIT+TIM-3 TM CD8+ T cells	0	0	0
EI17	Ei	HIV	TIGIT+TIM-3 TM CD8+ T cells	0	0	0
EI18	Ei	HIV	TIGIT+TIM-3 TM CD8+ T cells	0	0	0
EI19	Ei	HIV	TIGIT+TIM-3 TM CD8+ T cells	0	0	0
EI2	Ei	HIV	TIGIT+TIM-3 TM CD8+ T cells	0	0	0
EI20	Ei	HIV	TIGIT+TIM-3 TM CD8+ T cells	0	0	0
EI21	Ei	HIV	TIGIT+TIM-3 TM CD8+ T cells	12.5	0	0
EI22	Ei	HIV	TIGIT+TIM-3 TM CD8+ T cells	0	0	0
EI23	Ei	HIV	TIGIT+TIM-3 TM CD8+ T cells	0	0	0
EI24	Ei	HIV	TIGIT+TIM-3 TM CD8+ T cells	7.15	0	8.35
EI3	Ei	HIV	TIGIT+TIM-3 TM CD8+ T cells	0	0	0
EI4	Ei	HIV	TIGIT+TIM-3 TM CD8+ T cells	0	0	0
EI5	Ei	HIV	TIGIT+TIM-3 TM CD8+ T cells	0	0	0
EI6	Ei	HIV	TIGIT+TIM-3 TM CD8+ T cells	0	0	0
EI7	Ei	HIV	TIGIT+TIM-3 TM CD8+ T cells	0	0	0
EI8	Ei	HIV	TIGIT+TIM-3 TM CD8+ T cells	0	8.55	4.285
EI9	Ei	HIV	TIGIT+TIM-3 TM CD8+ T cells	3.335	0	0
S1	S1	HIV	TIGIT+TIM-3 TM CD8+ T cells	5.405	0	0
S10	S1	HIV	TIGIT+TIM-3 TM CD8+ T cells	0	0	0
S12	S1	HIV	TIGIT+TIM-3 TM CD8+ T cells	0	0	0
S13	S1	HIV	TIGIT+TIM-3 TM CD8+ T cells	0	0	0
S16	S1	HIV	TIGIT+TIM-3 TM CD8+ T cells	0	0	0
S19	S1	HIV	TIGIT+TIM-3 TM CD8+ T cells	0	0	0
S2	S1	HIV	TIGIT+TIM-3 TM CD8+ T cells	0	0	0
S20	S1	HIV	TIGIT+TIM-3 TM CD8+ T cells	0	0	0
S21	S1	HIV	TIGIT+TIM-3 TM CD8+ T cells	0	0	0
S22	S1	HIV	TIGIT+TIM-3 TM CD8+ T cells	0	0	0
S23	S1	HIV	TIGIT+TIM-3 TM CD8+ T cells	0	0	0
S24	S1	HIV	TIGIT+TIM-3 TM CD8+ T cells	0	0	0
S3	S1	HIV	TIGIT+TIM-3 TM CD8+ T cells	0.935	1.2	0.53
S5	S1	HIV	TIGIT+TIM-3 TM CD8+ T cells	2.7	0	0
S6	S1	HIV	TIGIT+TIM-3 TM CD8+ T cells	1.515	0	1.515
S7	S1	HIV	TIGIT+TIM-3 TM CD8+ T cells	0	0	0
S8	S1	HIV	TIGIT+TIM-3 TM CD8+ T cells	0.98	2.925	0
S9	S1	HIV	TIGIT+TIM-3 TM CD8+ T cells	6.25	0	0
S1	S2	HIV	TIGIT+TIM-3 TM CD8+ T cells	0	0	0
S10	S2	HIV	TIGIT+TIM-3 TM CD8+ T cells	0	0	0
S11	S2	HIV	TIGIT+TIM-3 TM CD8+ T cells	0	0	0
S12	S2	HIV	TIGIT+TIM-3 TM CD8+ T cells	0	0	0
S13	S2	HIV	TIGIT+TIM-3 TM CD8+ T cells	0	0	0
S14	S2	HIV	TIGIT+TIM-3 TM CD8+ T cells	0	0	0
S16	S2	HIV	TIGIT+TIM-3 TM CD8+ T cells	0	0	0
S19	S2	HIV	TIGIT+TIM-3 TM CD8+ T cells	0	0	0
S2	S2	HIV	TIGIT+TIM-3 TM CD8+ T cells	0	0	0
S20	S2	HIV	TIGIT+TIM-3 TM CD8+ T cells	0	0	0
S21	S2	HIV	TIGIT+TIM-3 TM CD8+ T cells	0	0	0
S22	S2	HIV	TIGIT+TIM-3 TM CD8+ T cells	0	0	0
S23	S2	HIV	TIGIT+TIM-3 TM CD8+ T cells	0	0	0
S24	S2	HIV	TIGIT+TIM-3 TM CD8+ T cells	0	0	0
S3	S2	HIV	TIGIT+TIM-3 TM CD8+ T cells	0	0.29	0.27
S4	S2	HIV	TIGIT+TIM-3 TM CD8+ T cells
S5	S2	HIV	TIGIT+TIM-3 TM CD8+ T cells	8.35	0	0
S6	S2	HIV	TIGIT+TIM-3 TM CD8+ T cells	0	0	0
S7	S2	HIV	TIGIT+TIM-3 TM CD8+ T cells	0	0	0
S8	S2	HIV	TIGIT+TIM-3 TM CD8+ T cells	0.255	0.225	0.39
S9	S2	HIV	TIGIT+TIM-3 TM CD8+ T cells	7.15	0	0
EI1	Ei	HIV	TIGIT+TIM-3 EM CD8+ T cells	2.835	0	0
EI10	Ei	HIV	TIGIT+TIM-3 EM CD8+ T cells	0	0	8.515
EI11	Ei	HIV	TIGIT+TIM-3 EM CD8+ T cells
EI13	Ei	HIV	TIGIT+TIM-3 EM CD8+ T cells
EI16	Ei	HIV	TIGIT+TIM-3 EM CD8+ T cells	10	10	10
EI17	Ei	HIV	TIGIT+TIM-3 EM CD8+ T cells	3.15	0.98	1.04
EI18	Ei	HIV	TIGIT+TIM-3 EM CD8+ T cells	0	0	0
EI19	Ei	HIV	TIGIT+TIM-3 EM CD8+ T cells	0	0	6.25
EI2	Ei	HIV	TIGIT+TIM-3 EM CD8+ T cells	0	0	0
EI20	Ei	HIV	TIGIT+TIM-3 EM CD8+ T cells	0.97	0	1.26
EI21	Ei	HIV	TIGIT+TIM-3 EM CD8+ T cells	3.11	0	0
EI22	Ei	HIV	TIGIT+TIM-3 EM CD8+ T cells	1.51	0	0
EI23	Ei	HIV	TIGIT+TIM-3 EM CD8+ T cells	0	11.35	8.39
EI24	Ei	HIV	TIGIT+TIM-3 EM CD8+ T cells	0	0	0.945
EI3	Ei	HIV	TIGIT+TIM-3 EM CD8+ T cells	0	0	0
EI4	Ei	HIV	TIGIT+TIM-3 EM CD8+ T cells	12.5	0	0
EI5	Ei	HIV	TIGIT+TIM-3 EM CD8+ T cells	8.35	12.5	0
EI6	Ei	HIV	TIGIT+TIM-3 EM CD8+ T cells	11.8	0	0
EI7	Ei	HIV	TIGIT+TIM-3 EM CD8+ T cells	0	0	0
EI8	Ei	HIV	TIGIT+TIM-3 EM CD8+ T cells	0	0	0
EI9	Ei	HIV	TIGIT+TIM-3 EM CD8+ T cells	0	0	0
S1	S1	HIV	TIGIT+TIM-3 EM CD8+ T cells	2.38	2.38	0
S10	S1	HIV	TIGIT+TIM-3 EM CD8+ T cells	0	0	0
S12	S1	HIV	TIGIT+TIM-3 EM CD8+ T cells	8.575	2.63	1.615
S13	S1	HIV	TIGIT+TIM-3 EM CD8+ T cells	8.35	0	0
S16	S1	HIV	TIGIT+TIM-3 EM CD8+ T cells	0	0	0
S19	S1	HIV	TIGIT+TIM-3 EM CD8+ T cells	0	0	0
S2	S1	HIV	TIGIT+TIM-3 EM CD8+ T cells	0	2.565	0
S20	S1	HIV	TIGIT+TIM-3 EM CD8+ T cells	0	0	0
S21	S1	HIV	TIGIT+TIM-3 EM CD8+ T cells	0	0	0
S22	S1	HIV	TIGIT+TIM-3 EM CD8+ T cells	0	0	0
S23	S1	HIV	TIGIT+TIM-3 EM CD8+ T cells	0	0	0
S24	S1	HIV	TIGIT+TIM-3 EM CD8+ T cells	5.565	2.095	0
S3	S1	HIV	TIGIT+TIM-3 EM CD8+ T cells	5	5.835	3.335
S5	S1	HIV	TIGIT+TIM-3 EM CD8+ T cells	8.8	0	1.315
S6	S1	HIV	TIGIT+TIM-3 EM CD8+ T cells	2.78	0	0
S7	S1	HIV	TIGIT+TIM-3 EM CD8+ T cells	0	0	0
S8	S1	HIV	TIGIT+TIM-3 EM CD8+ T cells	0	0	0
S9	S1	HIV	TIGIT+TIM-3 EM CD8+ T cells	6.61	0	0
S1	S2	HIV	TIGIT+TIM-3 EM CD8+ T cells	0	0	0
S10	S2	HIV	TIGIT+TIM-3 EM CD8+ T cells	0	0	0
S11	S2	HIV	TIGIT+TIM-3 EM CD8+ T cells	0	0	0
S12	S2	HIV	TIGIT+TIM-3 EM CD8+ T cells	0	0	0
S13	S2	HIV	TIGIT+TIM-3 EM CD8+ T cells	0	0	0
S14	S2	HIV	TIGIT+TIM-3 EM CD8+ T cells	0.645	0	0
S16	S2	HIV	TIGIT+TIM-3 EM CD8+ T cells	0	0	0
S19	S2	HIV	TIGIT+TIM-3 EM CD8+ T cells	6.5	0	0
S2	S2	HIV	TIGIT+TIM-3 EM CD8+ T cells	0	0	0
S20	S2	HIV	TIGIT+TIM-3 EM CD8+ T cells	0	0	12.5
S21	S2	HIV	TIGIT+TIM-3 EM CD8+ T cells	0	0	0.105
S22	S2	HIV	TIGIT+TIM-3 EM CD8+ T cells	11.35	5.04	6.25
S23	S2	HIV	TIGIT+TIM-3 EM CD8+ T cells	8.025	0	0
S24	S2	HIV	TIGIT+TIM-3 EM CD8+ T cells	0	4.76	2.82
S3	S2	HIV	TIGIT+TIM-3 EM CD8+ T cells	3.99	3.1	0
S4	S2	HIV	TIGIT+TIM-3 EM CD8+ T cells
S5	S2	HIV	TIGIT+TIM-3 EM CD8+ T cells	0	2.78	14.805
S6	S2	HIV	TIGIT+TIM-3 EM CD8+ T cells	1.54	0	0
S7	S2	HIV	TIGIT+TIM-3 EM CD8+ T cells	0	0	0
S8	S2	HIV	TIGIT+TIM-3 EM CD8+ T cells	0	0	0
S9	S2	HIV	TIGIT+TIM-3 EM CD8+ T cells	6.25	0	6.25

## Sheet: Combinations CD107a
Patients	Group	Condition	Population	single CD107a+	CD107a+IFNy+	CD107a+IL-2+	CD107a+IFNy+IL-2+
EI1	Ei	HIV	TIGIT CM CD8+ T cells	0	0.07	0.08	0
EI10	Ei	HIV	TIGIT CM CD8+ T cells	1.13	1.06	0.235	0.88
EI11	Ei	HIV	TIGIT CM CD8+ T cells	NA	NA	NA	NA
EI13	Ei	HIV	TIGIT CM CD8+ T cells	NA	NA	NA	NA
EI16	Ei	HIV	TIGIT CM CD8+ T cells	0.96	0.4125	0.05	0.037
EI17	Ei	HIV	TIGIT CM CD8+ T cells	0.11	0.4	0.0355	0
EI18	Ei	HIV	TIGIT CM CD8+ T cells	0.45	0	0	0
EI19	Ei	HIV	TIGIT CM CD8+ T cells	0.0555	0.0985	0	0.013
EI2	Ei	HIV	TIGIT CM CD8+ T cells	0	0	0.02	0
EI20	Ei	HIV	TIGIT CM CD8+ T cells	0.049	0.1045	0	0
EI21	Ei	HIV	TIGIT CM CD8+ T cells	0.155	0	0.09	0
EI22	Ei	HIV	TIGIT CM CD8+ T cells	0.57	0	0.145	0
EI23	Ei	HIV	TIGIT CM CD8+ T cells	0.285	0.21	0.12	0.055
EI24	Ei	HIV	TIGIT CM CD8+ T cells	0.33	0	0.26	0
EI3	Ei	HIV	TIGIT CM CD8+ T cells	0.095	0	0	0.0295
EI4	Ei	HIV	TIGIT CM CD8+ T cells	0	0	0.043	0
EI5	Ei	HIV	TIGIT CM CD8+ T cells	0.715	0.26	0	0
EI6	Ei	HIV	TIGIT CM CD8+ T cells	0.19	0.265	0	0.26
EI7	Ei	HIV	TIGIT CM CD8+ T cells	0.895	0.095	0.185	0
EI8	Ei	HIV	TIGIT CM CD8+ T cells	NA	NA	NA	NA
EI9	Ei	HIV	TIGIT CM CD8+ T cells	0	0.305	0.615	0.6
S1	S1	HIV	TIGIT CM CD8+ T cells	0.3665	0.2565	0	0.125
S10	S1	HIV	TIGIT CM CD8+ T cells	0.52	0.16	0	0
S12	S1	HIV	TIGIT CM CD8+ T cells	0	0	0	0
S13	S1	HIV	TIGIT CM CD8+ T cells	0	0	0	0
S16	S1	HIV	TIGIT CM CD8+ T cells	0	0	0	0
S19	S1	HIV	TIGIT CM CD8+ T cells	0	0	0	0
S2	S1	HIV	TIGIT CM CD8+ T cells	0.245	0	0	0
S20	S1	HIV	TIGIT CM CD8+ T cells	0	0	0	0
S21	S1	HIV	TIGIT CM CD8+ T cells	0	0	0	0
S22	S1	HIV	TIGIT CM CD8+ T cells	0.14	0.074	0	0
S23	S1	HIV	TIGIT CM CD8+ T cells	0	0	0	0
S24	S1	HIV	TIGIT CM CD8+ T cells	0	0	0	0
S3	S1	HIV	TIGIT CM CD8+ T cells	1.215	0.645	0	0.895
S5	S1	HIV	TIGIT CM CD8+ T cells	0.61	0	0	0.36
S6	S1	HIV	TIGIT CM CD8+ T cells	0	0	0	0.09
S7	S1	HIV	TIGIT CM CD8+ T cells	0	0	0	0.21
S8	S1	HIV	TIGIT CM CD8+ T cells	0	0	0	0
S9	S1	HIV	TIGIT CM CD8+ T cells	0.125	0	0.0135	0
S1	S2	HIV	TIGIT CM CD8+ T cells	0.105	0.1215	0	0.07
S10	S2	HIV	TIGIT CM CD8+ T cells	0	0	0.18	0
S11	S2	HIV	TIGIT CM CD8+ T cells	0	0	0	0
S12	S2	HIV	TIGIT CM CD8+ T cells	0.785	0	0.0385	0
S13	S2	HIV	TIGIT CM CD8+ T cells	0.235	0	0.115	0
S14	S2	HIV	TIGIT CM CD8+ T cells	0	0	0	0
S16	S2	HIV	TIGIT CM CD8+ T cells	0.06	0.115	0.115	0
S19	S2	HIV	TIGIT CM CD8+ T cells	0	0	0.023	0
S2	S2	HIV	TIGIT CM CD8+ T cells	0	0	0	0.014
S20	S2	HIV	TIGIT CM CD8+ T cells	0	0	0	0
S21	S2	HIV	TIGIT CM CD8+ T cells	0	0	0	0
S22	S2	HIV	TIGIT CM CD8+ T cells	0	0	0	0
S23	S2	HIV	TIGIT CM CD8+ T cells	0	0	0	0
S24	S2	HIV	TIGIT CM CD8+ T cells	0	0	0	0
S3	S2	HIV	TIGIT CM CD8+ T cells	0.2655	0.221	0	0
S4	S2	HIV	TIGIT CM CD8+ T cells	NA	NA	NA	NA
S5	S2	HIV	TIGIT CM CD8+ T cells	0.18	0	0	0.32
S6	S2	HIV	TIGIT CM CD8+ T cells	0	0.007	0.007	0
S7	S2	HIV	TIGIT CM CD8+ T cells	0.365	0.0435	0.126	0
S8	S2	HIV	TIGIT CM CD8+ T cells	0	0	0	0
S9	S2	HIV	TIGIT CM CD8+ T cells	0	0	0	0
