# Supplementary material for: Selective loss of CD107a TIGIT+ memory HIV-1-specific CD8+ T cells in PLWH over a decade of ART
Source: eLife. 2023 Sep 19;12:e83737. doi: 10.7554/eLife.83737 (PMC10508883; doi:10.7554/eLife.83737)
Supplement: Figure 5—source data 1. [file elife-83737-fig5-data1.xlsx]

## Sheet: HIV
HLADR,"CD38","CCR7","CD107a","TIM3","PD1","TIGIT","CD27","IL2","IFNg","CD45RA","tSNE_V1","tSNE_V2","louvain"
195.036,365.707,192.769,120.665,-59.2256,197.375,378.274,2060.15,1538.74,411.75,454.379,-34.0366035515696,0.19558675344061,19
30.232,1019.2,626.981,216.65,-37.1643,700.764,104.097,1338.13,5019.39,1686.42,7107.99,-5.13139875800444,26.4153786046851,15
548.787,1937.36,1027.16,1405.28,-273.14,172.994,828.336,2035.53,2187.23,168.066,16772.5,17.3651336320488,16.2529786649916,14
185.636,532.405,199.75,90.6473,97.168,307.608,980.434,1643.18,3495.25,1092.11,367.041,-27.1041576338554,-22.3921713235071,15
53.2724,706.82,862.066,26.6311,159.407,15.2277,52.4428,1919.66,1762.89,266.137,14477.3,9.97967454366116,29.3069521705888,14
121.752,366.445,402.495,207.308,23.4835,48.9961,1175.75,1758.96,1203.91,491.923,3778.82,-24.9214492854963,-22.9640502595561,21
168.08,280.521,774.407,130.997,75.7686,82.3983,-218.331,1951.54,1106.48,360.382,10038.9,-2.19433667543078,33.0956821251776,2
159.473,1202.1,883.789,457.808,-42.8638,182.669,872.412,2158.13,2578.61,444.046,11762.6,5.5685040476922,22.8319825919906,2
311.456,1165.87,1327.4,101.056,-50.7786,832.983,333.434,2294.19,3906.99,5354.43,11546.4,13.0719242167248,-10.0377087434472,13
434.955,246.47,190.346,785.753,-0.203143,233.497,535.563,365.212,149.508,90.7182,125.874,-11.6846910908455,-7.01176362790076,16
-25.9133,354.049,697.513,-94.5758,56.1567,-58.5777,669.985,1907.13,139.022,1511.9,18014.9,17.5566507236092,21.0447822314036,14
205.89,756.846,752.111,235.743,26.3939,500.155,294.039,1775.27,1469.35,563.761,10094.6,-2.4799874841572,28.6451487557269,2
289.416,267.063,66.3424,559.142,-64.3243,331.782,1417.08,868.59,140.82,89.5746,433.627,-15.6467203945961,-25.656712539344,18
159.86,283.249,158.853,70.8154,-38.8172,132.549,276.823,2285.6,1631.49,214.816,1973.68,-38.4771307977725,0.535974205396404,19
95.542,1369.42,930.268,-58.8596,47.0224,86.2985,584.878,3158.2,673.109,1064.05,14764.1,4.74304491533252,24.9378354342682,14
143.606,285.559,346.629,5403.98,-114.118,140.396,249.815,1404.41,-17.2197,266.73,213.472,0.489504188794763,-21.625550866291,23
247.638,3248.28,669.065,434.849,-56.3746,335.394,-273.273,1664.58,1641.47,704.008,12471.9,3.68441557757418,17.1427280774391,27
210.614,408.817,315.72,136.214,-31.1877,419.343,3120.24,1662.33,906.747,1839.06,11840.9,20.3611626209378,-3.26929661922731,10
414.49,206.15,24.8967,10.8173,33.4842,-26.0873,1390.56,141.006,785.582,1365.83,13810.7,13.6134083607381,4.78069063740137,6
121.993,374.687,343.517,555.766,100.471,335.031,-123.976,1604.02,217.89,111.975,1281.68,-37.6631798904917,5.90343050235067,28
98.8363,316.435,893.43,18.6637,68.3708,58.7474,768.261,2392.56,2499.66,5344.21,14881.4,13.7189692146783,-9.36625059096498,13
201.222,367.858,165.085,230.18,43.0298,32.7407,-306.009,1638.11,326.913,981.061,14357.9,1.75306525119924,33.9989860325827,14
55.5259,940.4,702.687,75.3856,145.414,-68.6102,120.749,2597.61,1339.44,2695.59,21804.1,22.4010348578509,24.32059782259,13
81.8518,570.622,659.419,114.993,57.8909,65.0359,86.9566,2781.96,853.323,1644.65,11205.4,-0.698131605055014,28.6087684410133,2
93.1088,258.588,1097.81,1133.11,160.155,13.8724,360.224,1654.31,-34.0838,240.227,12156.3,4.7918151675058,32.223575836169,14
248.278,552.311,1104.67,103.005,85.6342,53.6465,-30.8708,2119.8,963.19,2045.28,17102,12.7030443939808,30.4072385387786,13
285.448,487.504,110.745,824.828,113.985,116.928,1465.08,358.302,-385.506,377.023,4204.81,-6.57035316586271,-24.0458280466808,6
812.069,654.617,58.5969,12.0122,167.254,1364.96,355.395,525.782,2001.23,2309.58,11306.7,6.23516702429885,1.86157561139124,13
135.495,464.198,120.026,70.965,27.8023,900.904,1780.31,434.395,1440.87,1069.9,1720.11,-9.96346427363009,-30.2556655206656,12
99.767,2594.47,512.548,167.824,37.843,145.166,87.0319,1834.8,624.072,1071.26,10188.8,0.280206148219394,17.5190163345096,27
492.143,1467.41,870.41,446.887,-58.5332,118.734,1599.87,1762.02,5705.89,1908.28,725.556,-11.5748767795657,-25.4925868466742,15
350.691,315.205,173.191,989.347,71.3557,40.5554,676.539,1426.28,-282.168,550.804,1406.23,-14.0895175742054,-8.98723981871895,28
157.839,303.874,107.066,684.779,87.8484,412.059,148.983,214.829,333.577,319.957,-238.42,-29.7913571433067,10.6124400041182,16
423.229,650.033,505.61,669.377,63.296,179.903,328.422,1357.24,89.476,248.018,1951.69,-13.1641623393091,-6.43418920649703,28
110.161,395.463,479.325,96.9674,53.81,334.718,-102.938,3719.98,1352.95,4136.86,9157.41,-2.11216516319885,25.6224467157326,2
324.419,1478.09,442.65,1013.8,59.4783,355.45,2715.71,401.197,243.47,687.624,2081.97,-5.43316717865653,-34.4571184928506,6
145.005,863.243,1074.83,131.194,67.2929,8.27254,154.217,1947.48,408.46,1269.47,10554.8,-2.09726389410922,28.7967199964752,2
112.576,226.338,63.5432,30.511,58.2491,133.228,3673.19,405.398,5260.4,10459.7,-1499.02,13.5527998817917,-27.734520353265,17
58.089,290.522,-48.2721,590.077,-80.1814,233.479,96.338,2403,329.231,99.1604,418.324,-39.0376167294596,2.86664093533798,28
115.417,267.809,85.2549,1114.55,-31.1235,133.024,899.787,464.663,-263.103,135.109,6636.57,-12.209226885674,16.3551062165542,6
145.465,1282.23,25.1597,639.176,135.067,199.213,3580.64,374.232,31.0366,143.755,3741.64,2.31773696940864,-41.6259067100246,11
139.256,2847.91,869.261,3545.49,93.6048,213.976,198.274,2393.38,108.087,320.239,12593.7,3.56136609739408,19.053565272393,27
167.063,322.656,93.6045,641.149,-67.9167,86.0322,1108.58,383.746,31.6871,143.135,23999.2,24.1462711878284,10.6775910700718,26
373.093,7336.73,250.194,28629.2,-1684.16,230.833,759.826,768.298,177.245,419.633,2904.28,5.35262553525472,-24.5813918398693,24
88.3221,4536.81,386.488,582.633,-34.4729,145.81,240.38,745.979,254.013,66.3301,4575.36,-0.270554129644178,13.5720395971545,4
76.5773,201.307,165.002,1161.68,20.8607,164.591,-108.113,1961.18,399.6,236.822,120.305,-38.3234449137288,4.97628908985777,28
222.944,777.9,1034.03,24.4635,91.5614,537.528,47.6505,1672.72,601.666,1065.44,8577.49,-3.14137568875872,28.3061813678548,2
756.728,340.433,92.7749,136.979,115.272,152.385,274.324,243.467,474.669,935.037,97.7953,-3.6723071453158,-5.27317967341479,25
132.159,2670.96,552.843,339.734,-46.8743,93.6596,592.22,2194.18,1913.82,449.24,6498.91,-2.3063333162476,15.1070896341872,2
190.175,1475.87,704.57,-91.976,31.9569,228.27,674.187,2563.89,1357.51,2357.86,12836.5,2.21885566813392,24.4039581667326,2
86.1552,579.867,1233.43,4.6626,93.9488,20.619,422.872,1719.65,917.839,486.64,17604.1,15.8133410330992,23.3621797590492,14
154.82,868.458,984.117,70.419,75.3669,62.4065,-9.98032,2456.09,764.379,1038.82,21044.6,25.9743075859932,25.4461134759066,14
26.6704,2010.39,231.87,98.6086,157.671,135.102,521.626,1943.94,1233.21,1852.41,3972.87,-4.261574787415,14.1080329334732,28
223.99,381.979,1223.13,359.867,36.6774,-63.2893,-50.3072,2928.19,4095.55,9206.16,17551.4,15.4969482435422,-12.9044279968878,13
79.322,274.658,193.736,611.187,-25.3021,95.1638,4550.84,493.082,380.104,-51.771,267.142,9.88119479264246,-40.3174179391,11
187.305,348.539,80.2604,742.108,-56.2361,176.926,-292.985,301.937,162.196,128.887,149.916,-31.9239484804942,14.3651670904962,16
103.983,2404.18,932.214,161.111,-105.032,419.968,-563.813,1681.19,907.066,738.326,10851.6,2.52248921398118,18.3092352044754,27
-9.74091,363.971,159.553,591.663,83.3716,289.917,243.661,1717.53,2.62767,189.683,453.906,-43.7152531070434,-2.02548636893675,28
103.785,354.649,171.052,942.074,171.81,118.509,2689.77,335.734,-163.741,75.942,6831,-2.85362083790372,-28.9032057624462,6
145.944,1612.15,971.27,91.5991,147.031,138.699,-574.791,1879.74,534.114,823.404,13629.5,0.714032144056341,31.8272558119512,14
160.975,298.101,96.0979,674.971,73.4919,185.024,-81.1965,343.027,207.629,166.59,1903,-29.9929110225732,13.6534791699403,16
107.013,840.847,482.354,-22.6395,10.9632,76.0455,29.0298,1483.7,626.26,764.596,18048.1,20.3368978918788,26.9246454529694,14
176.267,227.956,805.273,46.2182,-46.8547,23.2859,-173.514,1442.3,1364.63,2389.04,14907.9,4.92251798906442,32.0890119213966,2
97.4942,264.663,82.6674,1725.88,78.8607,936.032,2223,344.552,33.5884,240.109,-137.838,-10.3120292638797,-33.2042445599085,18
254.679,322.664,38.953,91.7663,10.9839,252.957,1314.58,330.791,288.263,705.018,434.452,-14.7550152753457,-19.0546271022998,12
39.1808,1175.97,696.343,-58.2009,53.515,-135.78,467.466,2030.14,1057.46,918.438,18118.5,14.8706899090296,23.485637717177,14
199.914,288.493,503.23,-26.9991,2.13075,41.9252,1531.32,1226.42,940.054,587.744,16564.5,15.1459222612181,7.87409044202755,14
576.043,512.13,286.761,987.887,-98.2349,194.435,2047.21,955.68,1147.85,299.762,627.549,-11.9930656816863,-27.0981202580904,25
103.941,272.459,402.459,-109.511,137.078,80.776,136.505,2003.04,675.339,930.371,14758.8,6.04482638952911,28.6014367183821,14
93.3666,428.976,227.501,-43.2084,50.9295,-956.586,49.005,1801.81,31.1181,49916.2,3277.99,19.0506122217901,-21.4015394609903,3
246.196,271.286,153.334,3016.1,14.5829,411.972,1365.68,667.031,344.621,43.4843,297.593,-18.1663259387544,-23.4203014974581,23
220.174,498.537,983.773,72.0964,110.177,9.77476,185.08,2518.7,962.62,848.115,15743.9,9.7763239744724,29.5682965035039,14
153.003,965.18,1155.94,36.9603,-50.58,-206.423,88.5987,2327.48,560.261,747.466,21431.7,23.4995460360695,24.2028165760957,14
58.1913,2229.07,408.575,727.017,55.5384,-65.9611,310.657,1628.83,168.09,192.068,21205.9,19.2609022626021,19.5953966311413,14
102.006,165.108,77.9634,155.423,-55.3296,507.697,598.176,367.762,818.333,2129.48,146.538,-12.2386455780718,0.0434018608880277,17
120.479,416.184,525.702,780.179,58.8784,22.3943,1374.2,773.476,205.286,129.435,3319.76,-15.8996408808345,-24.4334859047517,6
185.397,237.008,268.924,1311.05,236.686,220.391,433.572,1326.68,2.64379,99.6505,301.245,-33.9374265799177,-8.40272160103864,28
105.653,491.731,539.772,19.3531,36.8796,-136.62,370.867,2466.23,2503.46,5179.44,14077.8,6.27541720278004,16.5852175085956,13
150.791,205.614,240.861,85.1826,181.563,139.948,399.034,1592.88,12062.8,168.464,1070.76,-2.99097260734555,5.77673279559439,15
253.532,1465.75,826.715,161.229,-120.291,-57.7113,814.676,2005.94,2728.79,728.967,14826.5,2.58990404458977,20.1235471555868,2
134.168,311.682,693.845,254.296,-39.2653,-16.0336,746.555,1690.22,642.709,1594,15890.4,10.2577193170452,25.3897893938605,2
133.207,1649.28,773.752,64.3434,-3.04138,-91.5788,-114.18,1538.18,671.144,1001.56,13683.5,3.54213291645862,24.0706621123146,14
44.1794,179.316,411.246,689.182,-38.4838,102.455,29.9999,2580.96,-209.442,161.189,1769.43,-32.401704792898,11.1114832979551,28
161.619,262.506,31.2464,1430.6,-135.374,497.483,1207.78,1033.43,165.508,75.5215,66.9891,-21.641272671573,-20.4788116910247,18
167.42,1461.3,1103.76,139.438,58.945,-32.527,-162.103,1760.28,13424.6,552.835,15938,0.299022902829501,5.65806508879707,15
190.857,8363.18,958.906,232.008,58.4809,54.8685,116.894,2066.84,2162.36,270.321,16889,3.90246598922728,12.9769443814884,27
79.404,1031.28,870.389,-57.2253,-67.9041,31.6356,753.841,2302.1,1379.7,291.221,10570,0.468747151342739,22.5978436527749,2
105.415,1076.27,934.035,173.593,156.823,27.4759,103.415,2167.07,971.662,148.4,12269.4,3.10283613454537,26.7960438155492,2
146.765,619.617,980.864,79.638,5.56711,-21.5667,632.218,2024.72,935.272,65.6956,16610.5,12.2000576582991,24.142463732962,14
74.1633,1376.49,1537.27,-41.948,7.35425,-499.682,586.247,2232.89,-95.9738,33507.7,11825,19.4771363066919,-21.0549161416449,3
344.121,544.835,-29.379,5401.98,-414.846,836.1,2343.42,1250.41,1002.61,14609.8,-679.124,12.1767710909168,-22.9965055228212,17
371.047,629.084,81.3394,46.9796,24.3501,203.2,789.99,292.364,4265.95,122.311,3707.28,-5.05235177436841,2.14330255768874,15
97.1708,408.681,1319.03,66.112,-27.5815,-31.0464,185.381,2539.89,487.069,794.75,13926,6.20781567981966,33.6760711666416,2
102.149,240.852,91.3781,173.931,45.3632,212.598,240.657,3534.65,284.907,1154.93,2327.91,-24.9792161127212,11.2324729221122,28
140.38,213.296,109.317,77.8676,4.35871,1323.72,5185.67,2427.68,723.356,1074.78,-474.425,10.2466011858415,-41.4579125931661,11
242.88,5674.03,1085.95,669.003,2047.68,153.089,-95.6664,953.482,115742,1154.11,22634,-0.722081874374936,2.63449752080309,15
178.339,213.594,137.635,1827.47,-107.702,191.762,1742.68,1748.81,215.466,122.452,-68.6145,-18.4156040370167,-27.3301152305552,23
131.07,909.335,807.747,60.0811,1.79734,103.523,577.527,2572,755.559,823.264,8361.1,-6.99016314995102,27.2998397698831,2
115.032,810.722,708.609,25.3841,57.3113,18.4373,-165.324,1870.64,1226.76,328.339,9261.76,-2.69180810837558,28.4798557721378,2
88.9085,1320.29,954.266,138.656,26.9598,-30.8002,-466.204,2164.96,911.123,1487.78,17648.7,14.1820050579139,29.8289507383707,14
115.512,499.954,705.85,125.519,38.8419,29.2191,151.278,1308.95,880.446,843.973,14831.2,7.19508077992446,30.2328817446424,2
108.143,343.909,958.132,128.673,-48.1284,136.093,-411.634,2013.84,1275.3,1507.99,14111.8,3.91437110184061,34.7952284289332,14
150.681,123.171,816.99,261.143,45.9276,46.301,271.103,1431.91,864.352,1151.78,3880.63,-15.8286496900069,10.7679711276713,19
774,390.319,793.904,307.757,47.7873,115.946,-22.1858,1791.19,922.476,584.618,14624.9,6.01815908635224,22.2063942421192,14
52.37,2421.38,565.473,259.619,-17.2193,24.2939,565.897,1823.45,919.321,79.5728,24450.7,24.2692225469773,15.0700552094853,14
586.406,2111.34,1736.42,1243.77,-78.4243,1068.8,218.867,2709.96,919.479,973.255,24953.4,23.6673124620196,17.795009257394,14
121.079,251.364,186.447,87.848,20.6909,89.2171,201.415,1771.45,873.67,1470.13,1949.03,-37.5011781825869,0.53058200795965,19
305.119,328.587,174.985,1490.18,66.0535,628.755,1798.95,947.522,253.758,-30.3935,547.333,-15.1138520682175,-27.8447352092902,18
27.7415,379.377,1441.04,57.9585,-21.2169,-64.5445,379.511,2717.63,489.341,717.811,13123.9,5.78339429865637,26.2995418773263,2
111.089,189.406,1059.81,262.524,34.02,1.64984,161.302,2675.9,249.197,795.08,12685.2,3.48342042052243,34.496419011293,2
54.1335,272.674,1237.62,1030.14,-288.001,-584.297,1114.59,410.882,167194,3486.43,4679.09,3.61456173484288,1.24620106315286,15
136.9,1478.22,601.45,139.06,-57.1439,232.93,3027.09,70.0592,2038.43,256.304,10.1146,-3.90312800222658,-39.0306783146641,6
129.61,350.211,341.769,153.26,85.5045,212.326,2423.26,330.75,880.174,1722.8,414.83,-6.37472509606396,-35.418157287637,6
234.886,1176.75,1175.73,66.0223,98.308,151.209,287.071,2610.02,544.525,908.735,12584.9,3.66558653824782,27.8629188859234,2
181.681,992.274,814.164,32.9799,-62.41,131.674,851.351,1830.07,2652.96,544.175,22924.1,22.3968135587841,16.3626637266272,14
80.5592,1182.08,564.276,41.755,48.9403,63.848,-9.23941,1474.19,1157.88,1671.06,13637,2.65684487743211,26.8549669136676,14
121.186,400.66,963.259,46.1134,-5.28715,112.797,331.402,2237.46,1931.63,3757.85,2652.8,-15.9685596326452,-1.54876540398358,17
115.979,262.483,139.632,151.76,-41.8737,228.753,1437.18,1227.31,538.486,945.03,764.088,-19.0453157833252,-24.1892129571628,21
73.6722,311.46,681.952,224.378,-52.7527,25.9218,334.861,2514.19,1735.83,1272.5,7222.39,-6.27530719549189,28.7512003211775,2
114.968,618.063,1560.81,58.0726,255.897,-30.2156,303.684,2220.75,712.901,1180.61,30357.2,32.3961459716178,13.8710459998152,1
262.5,573.259,1659.3,-65.2024,116.07,-12.0479,318.109,2268.56,1128.95,319.723,18028.4,16.5329479888617,26.2664097964169,14
48.7108,210.636,478.969,104.487,50.5732,-18.0704,82.5908,2136.38,1698.27,479.343,14527.4,5.47164237279096,32.798551454204,2
171.823,600.504,729.728,222.297,-29.1506,60.3311,88.9217,2332.68,1440.78,2366.13,16927.1,11.4190183557396,29.4408705517116,13
138.497,506.101,821.124,128.666,67.3953,-128.032,257.257,2029.02,2727.28,2491.04,19872,16.7943315268396,24.8353685620142,13
69.6843,542.544,830.072,68.3986,-10.5818,65.8432,-256.108,2063.75,1781.22,1327.43,19677.3,20.0322262440216,30.2325929291585,14
96.4154,1255.46,1062.01,31.4414,33.5331,-115.602,-50.0385,2804.87,505.758,887.763,15155.6,8.36331060247,28.4485844576514,14
143.986,1103.09,888.446,201.172,-25.682,-178.014,681.858,1585.12,2025.48,611.998,20262.8,18.3374932456203,20.7395297169911,14
294.147,431.259,1250.38,1069.06,51.1232,137.838,139.946,1613.1,307.784,333.082,21699.8,24.1659200259374,22.5058337237327,14
120.731,352.675,-9.29204,1365.84,-12.7604,1259.04,864.422,981.694,130.331,211.51,417.639,-25.0364782804911,-15.5871482743503,28
160.606,1118.55,953.601,1010.62,-211.887,-43.6362,855.114,1470.84,7810.99,-82.0617,11709.7,-3.36849217913764,7.36549474624377,20
273.734,549.114,457.65,615.823,777.381,-84.0941,179.013,416.202,108899,1378.01,323.914,0.763363583001895,2.19739596704866,15
107.509,222.442,507.891,102.843,125.062,-47.1062,887.96,1736.46,226.86,749.959,12872.8,6.36143537507014,23.9651542377348,2
311.766,694.534,364.835,558.291,63.3942,317.449,3239.27,1848.34,1320.39,752.786,601.457,-1.84956753410126,-39.8892679627832,21
-0.942446,1423.1,1242.26,97.4834,10.4076,-12.3518,461.841,1138.58,10892.7,352.488,13918.7,-2.44896948453473,5.91795032397063,15
233.906,398.646,26.3134,-5.4485,8.51869,247.456,275.557,248.222,439.216,818.627,1577.92,-18.3298706575497,9.26766819980472,7
76.2879,814.382,877.083,-113.055,71.7994,-4.97123,200.258,2597.99,7100.27,11173.3,15031.8,13.7163266919905,-9.03284239044161,13
268.574,270.187,96.6396,24.6503,98.9274,100.955,542.626,1138.73,339.258,742.81,4760.6,-16.1202489445585,10.735757204248,28
216.518,257.734,86.0127,957.555,-88.9637,136.238,-19.7251,600.275,493.602,-110.565,566.587,-35.6935730304351,9.87577276516724,16
142.008,208.175,307.27,-73.2873,138.779,-144.701,242.321,1429.71,1200.04,1347.88,19711,18.9714367633611,23.9962803591957,14
207.384,472.62,560.59,79.5658,-12.4109,202.32,-77.4286,2270.24,666.407,992.431,4692.16,-17.8657883759955,23.4393495067576,2
249.419,247.251,153.236,693.257,7.61912,323.593,723.321,546.627,27.2955,284.624,72.0687,-20.6576555618185,-9.05646520938302,18
199.477,1100.83,436.337,297.149,127.465,1501.87,114.943,1704.27,690.475,1317.46,18612,21.8180596161758,25.8804610581226,14
176.592,1177.69,1107.45,4.81361,-12.7689,-78.1867,822.461,2597.38,4304.72,9160.32,13953,13.1008956604332,-8.13777012265338,13
152.319,231.469,41.5032,1985.59,-59.1789,933.349,1004.74,732.018,1040.86,14112.8,-981.217,14.7892524032759,-19.9043803553197,5
208.915,474.569,1388.4,760.683,-60.8884,137.28,169.701,1769.58,668.11,824.71,7793.22,-6.1079989298749,32.2440556616606,2
298.365,202.786,98.722,58.1467,-3.69746,565.212,2286.9,702.578,4056.88,233.209,1010.85,-9.36073110388464,-28.7956987692729,21
175.457,824.897,949.549,113.752,151.463,-26.8915,229.093,2550.34,878.529,186.19,16762.3,13.1880562381448,26.8470409130124,14
84.2238,987.085,1192.22,252.176,-40.4337,-13.6999,1194.76,1308.04,1417.21,430.672,17775.8,16.4263010356898,13.8872347966752,14
554.206,632.913,795.538,719.958,126.875,362.647,-160.636,2276.05,590.16,580.59,14858.6,7.4878644624047,29.988162916641,14
165.893,384.031,1368.16,181.52,140.14,6.23282,330.56,2489.53,1525.94,1140.92,21213.1,21.2349989984974,23.6706162635612,14
1117,447.355,95.4048,4372.96,-210.358,910.241,4843.45,1308.18,48.4834,566.075,1182.26,10.0318785481382,-34.9618079324708,24
33.4611,547.311,1535.06,-156.167,170.882,-29.5407,269.342,2369.81,729.109,1167.98,16780.9,14.1980582127826,29.217784978814,14
168.654,386.647,772.141,80.691,93.8413,233.809,1715.27,1995.68,143.377,826.113,3068.89,-16.1691853004917,-29.7050617976679,21
114.905,385.256,72.0538,19.9278,454.368,374.02,334.031,2349.25,1158.75,747.727,845.654,-38.3914211870795,-7.8309402911354,19
92.6954,272.267,799.327,90.0326,-41.2541,-28.511,281.375,2301.95,688.895,1543.73,22574.9,22.2917842163954,22.1951654015844,14
645.836,957.417,801.679,760.295,-274.429,-40.7975,-266.979,1727.92,184.926,272.173,16712.8,10.0252744268783,27.0919856968343,14
251.59,823.472,860.058,24.5291,114.145,73.1339,1132.51,2837.21,1191.41,1137.93,7956.56,-6.65457805544688,13.9714834071102,2
244.085,382.623,82.1988,557.048,-82.4462,168.479,-91.1084,84.5252,288.489,-30.4816,-93.9447,-25.3276816263354,12.8734601841852,16
36.7304,799.921,1297.32,93.2227,101.025,-88.3757,-225.458,1612.83,3978.81,310.845,18543.9,14.5726595032852,27.8966075365877,15
118.061,199.887,597.143,-25.4497,-14.648,91.3606,173.297,2204.27,720.377,1649.17,8657.22,-3.44514516254772,27.601883363364,2
224.504,440.405,99.0208,774.527,-9.75969,112.77,2996.8,274.33,89.1265,108.416,7071.55,-2.84532450367596,-29.0410687384626,10
134.633,361.526,343.54,287.017,-18.3589,605.817,3851.87,3306.65,18612.8,546.993,264.343,0.0563977797771219,5.08802727987467,15
464.901,2337.93,942.763,389.433,-79.6092,31.4576,847.867,2033.56,4841.23,1423.76,12709.7,-3.11125763241882,16.9902111919813,2
175.22,1755.48,1299.67,13.6719,-55.179,-80.2168,728.856,1661.39,1098.06,599.649,20237.8,16.8916829373936,18.4091999557699,14
138.695,1241.28,356.593,121.66,-27.195,51.6624,169.317,2021.72,1044.05,627.33,12775.6,2.13432265738395,25.4971323872488,2
155.906,226.667,1438.16,56.1319,16.7891,-123.142,-78.1851,2781.65,1121.77,369.694,18781.7,17.9217931987853,30.6830979246732,14
200.475,418.818,202.445,140.288,-7.97828,365.675,2163.15,556.12,1340.71,766.653,1066.81,-10.4547964559597,-34.25249343759,6
235.289,889.972,568.599,563.077,-13.929,82.2999,176.309,1991.39,586.664,574.189,8921.58,-3.38732111970141,28.4251170186357,2
52.2832,240.61,289.103,53.4156,-98.1968,-58.8682,107.86,963.602,8178.22,242.797,5765.24,-4.72629854792052,6.31658394857544,15
151.532,3025.4,1067.84,-76.545,119.82,105.359,15.2541,2565.92,963.868,510.172,19940.4,9.26958651002798,18.438630904521,27
230.536,282.041,205.437,635.593,-101.17,-10.4153,2560.93,1290.35,1244.43,22454,684.214,16.8839366862098,-21.4781530614408,5
110.861,225.73,57.0684,115.219,282.665,810.706,2962.72,1130.91,16395.5,300.975,2051.77,-0.988069151510724,5.1547138795872,15
406.636,1019.69,992.608,749.936,-71.5094,2013.19,-119.653,2115.23,2259.91,2017.53,21799.4,19.2684585347525,26.3362561103021,14
92.0933,210.598,154.66,-26.3398,219.702,574.158,942.201,1350.08,723.93,809.001,1615.71,-30.017995429423,-16.3994960444369,21
666.553,1144.53,482.032,769.147,95.3773,1954.94,5413.39,470.042,1579.42,677.24,2827.2,12.636755216325,-37.5460596431511,11
97.8277,1389.23,701.033,-45.6175,120.992,84.6656,602.457,1737.74,983.162,2604.99,16290.1,8.51240882482025,24.1541572730137,13
110.426,307.873,83.8413,2415.9,107.004,489.959,5524.68,1381.25,30.3033,68.9777,1053,12.9292267698327,-38.0996670113559,11
112.501,326.644,602.895,-36.6721,-10.841,248.586,4093.77,1636.98,1178.55,2241.73,100.962,6.9458628588477,-42.5689073914913,21
266.268,315.954,156.206,796.453,-62.909,290.223,5963.24,1148.88,175.263,184.329,384.275,13.9817502846539,-38.1726031822964,11
69.6635,2380.06,1196.08,145.948,-9.2832,-73.0503,572.964,2114.29,903.204,218.956,22112.7,19.7150571654087,16.9347968547354,14
327.393,772.211,353.731,221.578,158.065,1768.06,2801.86,2300.69,1276.4,640.584,3203.39,-6.36320072820713,-39.1686517624146,21
78.8656,834.761,892.228,172.844,-3.16553,0.0678354,-37.3121,2610.14,1342.51,362.961,19422.7,20.2188711756036,28.0572437939011,14
166.918,2226.41,254.833,100.043,2.05583,10.4657,694.738,1370.72,533.404,764.291,8204.91,-2.09771341428346,16.3786044770064,2
59.4643,320.773,348.81,46.3007,-90.2546,-75.1808,342.407,867.642,7014.12,13249,16581.8,16.3163632255849,-14.7229891318945,13
154.862,672.959,570.717,39.3052,62.5549,128.574,844.547,1500.89,1782.67,427.722,9933.8,5.09098693205738,22.7968137567867,2
133.506,846.894,1209.56,423.764,58.5638,-21.2199,98.3499,894.174,22209.3,24.8674,13608.4,-1.05050037242362,3.53481323663819,15
176.312,305.494,110.98,553.715,-10.3217,252.413,235.414,1057.94,246.767,333.169,453.804,-35.9958218998368,2.73721183154147,28
166.65,252.712,110.15,11.6459,60.2235,354.686,989.161,443.155,553.771,1492.82,2585.57,-15.7496411247408,-10.6326786353488,12
133.209,313.765,232.053,75.3748,58.3312,113.119,1863.65,1302.15,1642.69,60.0002,742.281,-16.1544406649166,-30.4221223338728,21
138.02,503.193,1511.09,863.348,76.3878,30.0925,-8.72504,2047.99,-191.355,243.993,14349.2,10.6801736092692,31.9968219023556,14
177.863,286.89,189.337,1209.66,34.292,564.943,3440.07,496.088,505.282,222.146,-108.221,2.1832073202726,-38.7760721088756,21
35.571,3412.27,17.6221,-107.374,60.4138,1943.78,50.4577,2366.71,1664.7,3884.42,9071.1,0.685906300956263,16.4679088376068,27
69.754,198.278,85.4958,-4.68924,81.0992,583.543,2087.24,838.964,2921.29,191.13,6440,-9.53540069435189,-32.4147566241483,6
206.74,2812.18,865.452,269.411,-40.0564,116.856,-124.314,3106,1164.24,354.245,12263.9,2.05267431282049,15.4805722689792,27
707.475,2200.62,85.628,210.17,150.457,485.784,688.465,631.673,4587.49,233.956,1531.95,-6.60123067744864,7.78111628668978,4
272.606,1114.44,2003.97,438.21,-50.9469,41.3044,501.824,3693.94,2449.08,1004.27,12495.5,1.92766381325827,25.417624365278,2
90.8855,569.451,485.505,89.7061,73.703,-63.0647,474.793,1653.76,743.725,1959.28,20576.2,20.0968818889912,22.4440119774702,13
120.391,263.105,679.905,145.595,119.688,8.56009,1817.17,1509.13,733.719,1219.87,19527.5,18.6909401886273,7.27821726557507,14
63.9743,345.885,432.288,151.931,8.50266,252.496,465.502,2890.83,490.898,726.246,404.116,-43.3689288176897,-5.6817799586173,19
157.734,446.955,151.593,762.526,-2.5362,805.591,5607.03,382.366,306.28,29.4773,767.338,12.4702170489765,-39.4169189970205,11
227.255,617.137,662.464,195.035,41.0949,60.3761,1062.33,1805.09,335.822,1010.56,6114.97,-9.36573282557057,5.94784574364549,2
127.694,245.033,41.0246,757.027,75.1971,185.124,640.631,345.911,193.795,185.511,669.961,-21.7958093196582,-3.82661923775233,18
233.54,4580.16,715.535,21.3175,-37.2898,-84.669,1266.02,1314.4,2545.95,601.084,17401.5,2.00779905505861,13.9671751961085,27
190.672,324.979,124.914,587.391,43.3694,264.681,1277.93,707.553,152.728,207.057,1005.47,-18.4106461034578,-21.6791295340224,18
37.7549,161.736,55.9657,13.4316,15.6594,165.313,197.866,1850.62,685.808,1069.39,927.103,-43.1284364905696,-1.06803706234978,19
182.13,698.25,1021.28,131.745,2.0971,-4.47745,408.968,1844.15,200.1,700.849,8115.92,-7.84635745097598,27.2728002148091,2
478.906,1232.74,321.528,943.452,99.7681,660.885,1377.01,1411.34,666.92,429.642,1458.93,-15.1932519430265,-21.1563108922151,28
636.201,1045.06,184.577,1014.64,37.5264,792.661,1988.63,1318.17,-112.87,163.603,319.156,-12.2639232630345,-29.2424176236548,25
853.751,1094.04,75.7195,38.2621,97.0672,50.0444,226.206,533.317,-100.215,3447.13,-296.785,-3.97621097480356,-3.74018057338938,17
192.486,280.384,514.383,71.5223,107.478,-90.6466,277.53,1046.14,2736.21,5995.54,11013.5,12.8810348930133,-10.3708840569115,13
142.619,567.324,765.527,137.601,5.0302,-361.917,-63.2886,1183.58,587.483,25309.5,6006.73,18.1780994354283,-19.9762544564318,5
162.424,136.221,91.8491,1436.95,300.886,175.195,4240.1,274.374,107.085,293.737,2020.86,8.80683801999014,-36.4166518833006,21
96.856,1027.59,1350.16,219.509,-77.5364,-39.2558,449.61,2392.58,12559.6,710.454,12226.9,-1.84913175344763,7.00666842651422,15
250.121,328.276,406.199,104.271,144.029,182.407,-70.4263,1231.94,804.376,1217.17,7699.28,-6.32227341418184,26.6127680200204,19
198.867,289.183,42.8666,-40.5847,47.1648,120.361,1478.68,1727.22,466.883,706.234,743.985,-21.849756686035,-24.3393403971799,21
-19.0105,101.713,246.447,640.462,-45.0954,58.5092,-322.852,2400.32,288.389,175.649,1391.38,-36.6363579927365,14.5068088032236,28
495.982,218.858,119.265,2066.04,-35.7047,640.508,1548.75,673.134,1168.82,14421.3,-579.143,13.5879968320084,-20.8213126397072,5
153.64,256.676,265.606,90.9157,-41.9818,504.287,3435.78,316.954,916.022,273.865,881.445,1.91882191377923,-40.4961614389517,6
275.995,1312.22,571.071,251.054,-66.8265,79.9062,1123.59,70.6365,3514.42,412.213,2909.61,-8.12085934430493,-6.15891132817664,15
653.322,1727.91,1166.93,1254.55,-135.651,1827.24,358.395,1891.43,1672.2,1095.63,16033.1,3.66681141980326,24.6896266953695,14
44.1719,1157.34,311.422,19.9786,5.2437,262.483,902.3,219.347,988.729,104.962,133.915,-12.3940211573649,-3.84334887324799,4
247.846,279.435,-6.59536,147.623,9.23384,120.345,212.394,2008.84,1379.56,1251.82,289.412,-37.6048172401045,-2.47842932525358,19
178.472,698.923,502.029,584.245,1641.17,1380.6,6626.5,-241.333,195264,3627.71,-1993.36,-0.757298516721857,1.85046548922951,15
179.314,460.178,802.358,163.291,-58.5295,-71.651,-135.252,1506.19,15306.7,164.984,15665.5,-0.953093691434904,7.03965248556237,15
58.7837,421.408,698.746,27.5598,13.9811,-34.3133,-215.747,1758.77,1063.77,955.75,15233.2,7.54007257939649,33.1739545231393,14
146.22,2653.17,595.42,92.2877,93.4339,-28.6045,57.8334,1226.82,956.633,1133.21,9634.07,0.198668824375539,17.4628438874737,27
66.4466,1619.17,1178.76,325.943,217.582,-134.781,896.57,1283.21,40662.7,691.684,23334.8,0.160516003496723,2.00402559275217,15
64.7306,1213.92,1039.72,15.843,2.5648,634.502,-149.306,2372.42,715.763,819.815,18734.2,22.4383438567739,27.5435456215055,14
316.8,1193.1,369.187,296.99,118.539,1267.72,322.623,1865.41,632.477,898.894,15144.1,6.59994418420847,25.2344984505088,14
160.706,319.698,146.365,169.902,-26.9421,224.249,338.34,762.581,1382.38,742.292,176.71,-27.8720505983952,2.42474283957018,19
174.408,316.171,732.784,148.512,55.8933,76.6841,296.321,1750.24,1003.88,651.404,12403.5,1.69270343642711,30.6897310673034,2
51.9152,832.443,638.38,862.532,22.2769,144.32,-246.304,1717.08,215.188,129.642,9201.24,-2.95934536109772,31.7037930561202,2
291.158,258.026,93.4607,3.20017,46.2162,275.352,312.312,434.578,1239,356.398,669.537,-20.5883291081605,5.08879370637717,19
230.115,466.902,951.22,32.1228,-11.2097,122.292,400.183,2259.85,1083.77,432.336,13272.3,3.40574386762762,28.1897562639012,2
198.554,549.112,1173.22,172.927,-3.2625,239.076,2572.57,3745.44,1329.94,297.136,5408.16,-3.736779723113,-28.2415343393015,21
255.642,654.219,755.8,284.18,75.6528,-42.9139,136.402,1875.96,4144.94,5909.81,14813,7.8672031115877,8.31512728372046,13
167.316,216.271,936.62,77.2869,11.1532,-48.9825,-270.717,2233.96,1855.86,276.992,13051.4,1.51234194961837,35.5928168296299,2
110.528,377.464,127.768,2808.32,22.2,163.855,1234.9,122.488,23.4416,221.614,172.699,-14.0571730085908,-18.2969668805427,23
113.579,436.373,527.034,-101.377,111.318,157.775,2836.99,1689.2,538.316,761.766,3247.13,-5.74800504371441,-39.9265340980749,21
186.395,532.975,553.937,163.527,-0.999905,105.586,199.45,1735.92,945.372,974.731,10157.1,-2.5349231101587,28.5975148998827,2
0.718634,197.442,397.449,104.725,6.52821,73.0075,-229.158,1140.46,1061.14,1405.51,15136.7,6.64573545762585,31.938451199717,2
50.7972,262.063,285.865,-51.1959,-14.3487,202.039,1584.09,864.572,1077.76,1.80879,1730.61,-17.8424487802722,-27.3981994855332,21
143.776,661.175,1829.59,-59.3046,79.3403,217.157,27.5651,2706.46,643.067,764.52,10689.9,0.128942582505041,32.7181846045304,2
141.238,303.362,188.782,558.967,4.0758,969.845,5875.55,772.931,462.749,187.498,2596.33,13.9527079814475,-37.6674261359452,11
110.783,595.886,296.931,55.7814,-58.4573,79.0801,-294.586,2654.33,934.893,150.449,5410.63,-8.43500806437592,26.6833799885781,2
3.3277,281.295,921.055,22.3761,27.8565,81.7365,-194.883,2309.2,912.009,1983.5,14882.9,6.79111380445805,33.1733373492837,14
189.527,852.99,1095.78,-11.2892,116.699,-27.3612,565.694,1647.84,31086.8,836.493,10684.8,-1.31062767405267,2.87399014500898,15
184.408,346.65,135.764,1542.83,125.575,145.179,1544.69,414.758,803.491,611.537,2437.37,-15.2131817531992,-25.9417921755995,6
120.221,238.686,800.533,173.245,21.07,-73.7965,662.375,1883.42,724.069,746.359,17992.2,13.9910471925995,23.4784787693909,14
175.61,369.778,234.833,77.3905,0.729766,181.535,441.799,1024,775.413,824.321,4249.39,-20.6921731707259,13.6427311069487,19
182.156,328.658,147.146,114.639,0.636169,184.988,1212.99,891.674,1980.57,452.078,376.96,-19.4746013776429,-19.3739536014151,19
80.1855,177.71,38.5328,67.6401,27.0272,142.92,2301.83,1914.38,234.569,1212.86,-62.9955,-9.59353769399978,-33.700030130829,21
156.707,257.56,1026.45,-142.008,44.344,-90.9567,152.141,2067.39,795.78,714.526,18625.9,17.3387193230642,27.8547957483445,14
186.639,1459.3,954.514,141.389,87.112,56.6451,817.719,2247.3,2471.5,572.068,14177.6,2.7474391914564,22.0361230366305,2
99.3262,969.962,918.521,-9.94801,84.308,-182.868,941.138,1069.91,3883.21,9143.68,19416.3,14.4985449436276,-9.22655036305402,13
109.242,287.162,848.562,152.482,-6.32066,35.4809,2359.16,1145.3,667.118,874.224,8984.57,-2.76018889941085,-26.2237689636597,6
533.581,224.712,119.42,672.183,14.5656,977.758,6206.63,817.93,62.8678,178.416,-77.0525,13.5581785553693,-37.9186890547532,11
135.484,417.679,236.588,664.997,-98.3997,202.043,83.5816,2794.77,-51.2596,238.048,392.713,-42.4552008804389,2.57666745967502,28
84.5158,221.679,130.636,305.964,118.493,168.462,1101.11,1044.2,17.859,4650.08,519.932,3.399549069446,-18.1327950731596,17
134.467,441.179,1207.85,85.945,-16.4703,86.209,172.704,2468.07,719.095,1620.82,12859.5,1.95441058348036,33.3100095786009,2
193.32,1304.43,836.372,39.9507,7.63904,28.81,-1.34701,1845.37,4802.81,100.364,15966.6,3.66740302161194,20.6024007523888,15
124.992,223.404,147.994,611.124,59.2846,120.368,408.179,21.9883,202.051,-16.9242,338.35,-22.2394713886813,4.18686671950357,16
108.54,638.79,562.476,105.755,-14.4573,660.949,-413.935,2127.32,3164.63,2667.34,20438.7,19.4620863942487,27.2765230101593,13
173.79,256.548,125.554,632.637,36.4907,237.892,-448.068,475.121,218.518,192.595,1072.22,-26.1689493369744,13.8487264126954,28
57.3721,379.285,365.459,-1.57183,-29.9084,161.433,264.227,838.067,1459.47,909.94,1904.34,-25.0533360852676,8.11391260736108,19
103.346,271.588,157.224,641.873,-48.8623,177.273,1201.45,922.718,-31.4104,36.7731,932.864,-22.0961984241745,-22.8625244931788,18
215.89,830.987,1336.93,337.626,80.2537,-0.0200665,1012.85,2991.21,1492.13,473.579,19322.4,15.8567580116021,20.4589167465614,14
220.007,265.468,181.687,5419.89,-134.26,885.965,3665.38,1655.79,944.662,6711.15,-421.534,10.8654321704824,-30.2928269826371,17
225.451,345.196,151.942,-18.5297,-41.2156,332.617,1557.84,597.803,1016.56,154.011,310.296,-16.553805056982,-25.3717822934216,21
808.624,413.448,209.297,6165.65,178.938,122.999,2698.39,1217.97,452.954,4.50206,574.991,4.26802874584879,-33.4918007566498,23
154.588,691.016,526.844,230.473,3.41354,173.145,49.5292,1827.24,971.049,2449.5,19913.2,22.0214342549977,24.533912976323,13
120.615,1174.85,447.46,152.036,-80.4506,-13.6882,532.307,1269.96,605.047,728.692,18161.8,14.8564912523058,23.233536290473,14
661.45,376.697,56.8861,580.513,-18.5116,594.994,1939.76,243.254,658.183,530.898,1002.2,-9.91122723874497,-27.4288270489921,25
92.4499,232.846,93.2255,834.441,81.1328,491.973,5258.72,169.736,127.465,327.448,12.6962,12.332459496063,-37.4802380199396,11
188.22,584.919,450.717,264.245,91.4332,-20.3658,97.458,1570.14,1263.83,580.139,18942.8,17.9016589316366,26.7816894554983,14
112.921,593.564,908.569,-6.95452,47.6702,-42.652,275.973,1953.69,1075.02,2076.04,16316.4,10.5677082140779,28.7482344012819,13
281.202,3145.53,179.163,197.344,-176.036,-58.5207,-1455.09,1821.31,933.14,834.183,18881,10.5537808496061,19.9569729391793,14
288.652,218.018,52.085,16.9733,358.162,120.68,3225.68,476.238,1399.1,1354.56,851.393,0.895197594203991,-36.5819944883689,6
88.7365,260.154,805.329,14.6862,149.59,-26.2206,337.841,2036.25,743.093,860.724,18162.8,16.2583210215877,26.9584621791101,14
78.2024,1487.13,1465.6,195.29,-45.6426,-6.65569,-301.086,2630.47,882.143,1684.96,18430.5,22.4986284790682,27.3951898985501,14
135.112,343.199,843.935,75.0914,-8.74943,159.268,-105.691,2590.35,1071.58,1300.48,13302.4,2.0927947290207,34.5518445564652,2
49.3601,447.199,1138.92,198.746,44.6789,-84.9042,165.873,2239.29,1328.06,143.561,16855.8,13.7819390802738,29.7829234346885,14
128.568,821.572,1408.1,255.457,-60.0082,103.66,1024.89,1831.84,975.748,415.943,11850,5.65904410155991,23.0633382140389,2
10813.6,6915.24,41.5418,2347.27,141.362,1884.76,1561.56,511.1,-13.4087,380.633,115.324,8.9330964358573,-5.7035030915799,8
116.183,198.066,214.551,602.651,200.235,124.043,558.03,813.205,112.452,163.657,6256.28,-12.2523752639481,19.2332720608338,28
183.602,344.1,136.55,66.3765,-16.2045,365.014,4003.15,626.345,927.261,386.874,473.984,5.27371924114327,-39.9179643552228,11
116.159,1078.19,504.819,109.188,-55.0213,47.0514,1578.57,2267.06,1803.79,1681.05,4303.14,-15.9057491336159,-21.0586257187134,21
97.397,545.707,809.833,590.307,-90.9867,42.8705,-125.354,2279.55,319.221,224.48,5677.48,-8.7958645058904,31.2354543258949,2
757.296,425.667,198.591,232.392,-12.7849,174.073,2743.85,803.202,357.318,1085.26,-219.204,-3.30221525489281,-36.533711467744,9
74.0259,881.081,498.257,31.7448,58.6813,-85.2801,180.442,2123.32,1169.17,1233.44,19253.2,18.4677776395335,25.9879016150371,14
114.562,154.202,40.7328,1901.48,-99.7948,878.607,2021.75,399.124,162.896,33.2776,411.015,-13.4464316572128,-33.8645158614853,18
169.465,794.025,1248.4,-71.949,-16.168,69.1076,32.9314,2454.45,2747.7,242.391,16704.8,10.8108712968422,27.003380528327,15
577.486,746.582,-40.687,830.986,-1.80371,182.556,-326.793,624.877,-49.0018,-3.75917,260.738,-14.6790292462431,-0.6583476510544,25
147.799,507.526,504.517,122.512,94.0807,0.937354,303.84,1622.76,1096.47,1170.53,17365.9,13.5847752257703,26.7737450858347,14
62.8571,349.229,792.315,189.123,1.94934,112.829,-289.38,1990.65,1328.87,464.315,13367.3,3.00010672045752,34.7317503149161,2
238.89,239.888,-69.6508,158.798,2.56036,40.4252,897.909,2628.8,655.391,728.913,15397.7,8.21668669532621,24.5433477558565,2
416.756,701.491,190.842,4988.55,-308.838,466.593,755.288,361.72,3.83984,43.8934,938.884,-4.85063359012701,-18.9922673663728,23
100.909,475.362,577.127,773.333,-12.4238,124.053,575.456,2126.15,877.257,48.0253,7793.02,-4.43717255079749,28.2139025254968,2
64.9567,313.109,8.88121,911.923,-9.88785,120.986,160.099,245.034,153.845,-25.8756,492.497,-26.38311067955,10.8576350113433,16
332.91,215.888,106.082,74.5947,61.6987,216.735,3567.92,335.907,725.858,777.45,635.457,3.89240928379607,-38.7805314550069,10
396.138,1508.74,535.57,42.9451,271.514,195.204,2907.96,87.6656,1037.92,130.074,2035.51,-3.47450712478423,-36.6322651448613,6
591.523,1223.69,-5.45701,492.416,30.1458,1597.15,9082.91,786.792,140.633,868.61,-326.369,17.2255024359033,-39.7692741245033,11
132.999,674.714,966.651,117.334,75.6913,31.4234,148.631,1211.6,11255.7,166.975,13322.2,-2.86729580205996,7.23080822309198,15
127.646,706.469,1073.14,140.42,-39.4118,74.9477,-259.595,1471.11,1917.59,186.396,4552.79,-12.34121340709,23.9330758173391,2
96.9247,3223.32,609.709,504.612,2509.92,-262.022,-46.6352,788.984,199646,3150.44,15878.5,0.68650362418462,0.293776664047203,15
343.427,602.181,549.378,445.234,7.47265,858.924,2968.62,699.213,2422.38,666.657,354.937,-3.49265513084022,-37.902230926688,21
120.113,928.478,336.914,80.9643,136.97,407.044,767.5,274.416,4078.52,88.6726,334.276,-4.61657109387308,1.01095443950447,15
62.26,402.772,848.372,146.765,249.973,-147.235,398.531,1484.98,48271,1263.68,6044.54,-0.58258890844963,2.32514061523485,15
148.227,277.185,455.19,377.031,1264.83,1.1558,742.862,-1573.98,146535,1172.9,4345.44,-0.729246180649247,2.30418570930507,15
111.43,755.154,1284.67,76.3143,23.8766,-102.032,672.148,2010.45,1220.21,2951.15,18315.3,14.9895126901713,23.2714659126186,13
199.527,338.047,473.055,601.293,125.725,107.957,2753.67,2908.3,129.326,325.518,4053.72,-5.67026114417555,-33.4886778149512,21
158.941,261.583,125.319,66.3103,49.5892,133.028,3490.23,105.569,2766.96,114.77,2200.39,1.21474897656509,-39.1080557994921,6
51.4386,303.261,300.725,-54.8948,22.5588,88.7108,2673.33,2176.5,728.553,1901.65,268.109,-7.92343817060596,-38.44416727535,21
122.874,511,741.961,756.163,83.0494,4.76451,-299.085,1384.92,96.6019,229.634,14121.2,6.08005518218997,34.6929767876281,14
179.76,263.42,434.499,153.423,-132.731,76.7394,199.823,979.543,17788.1,62.8995,934.696,-3.49907902522417,5.53678315929458,15
142.837,1553.43,1453.56,198.148,-74.6813,6.03159,841.049,1701.24,2925.63,441.255,13258.9,1.10052554955811,18.5669629744159,2
101.671,835.863,1180.79,38.9785,91.1065,66.886,692.985,1893.29,990.888,212.723,18687.8,16.4204140219904,21.9021357891814,14
904.747,2178.8,196.389,848.126,-62.9445,442.125,5696.68,-7.73443,428.348,65.5285,391.434,9.59932589588489,-39.5671640361365,11
456.595,216.079,154.377,-27.6734,75.5199,249.196,360.935,629.865,3108.19,194.479,255.054,-13.8124132605537,2.34139693972186,15
290.274,486.57,68.6868,69.7645,165.056,85.2632,2888.02,224.509,927.129,2414.64,6363.89,1.2853303047004,-32.6430239485018,10
42.4749,305.481,2085.54,47.0827,71.2426,-52.7434,649.935,2880.9,2001.33,5370.77,15011,10.4505071882012,12.1266830835015,13
-25.2137,3957.8,526.813,-12.5956,6.46461,72.1704,758.974,2127,839.672,913.158,15439.5,1.45138012634401,15.6600862601846,27
158.426,224.12,115.328,85.6625,78.8669,299.423,1052.88,1478.51,536.236,790.367,461.817,-23.1457620544051,-17.630418134903,21
77.2074,232.796,1226.93,-78.9334,123.556,21.3815,258.094,1978.73,3524.68,338.316,18220.5,14.4216068734973,25.4247613191691,15
36.247,205.593,96.8835,1624.97,51.8837,250.07,127.011,883.818,343.272,90.0727,344.765,-35.9031720456359,4.34477942269879,28
53.2212,647.487,585.364,597.189,20.8569,-0.472093,314.433,1578.13,434.032,697.236,10264.2,-1.7638040201191,30.4520812315799,2
36.1042,1004.15,546.109,107.957,104.289,112.1,29.178,2245.63,4094.45,287.615,4000.49,-5.00917908269298,9.90729114830408,15
294.952,517.756,41.5774,-9.68833,234.809,9.01352,4228.61,267.053,1088.76,128.283,10545.5,14.0671195812636,-29.9494543341465,10
110.612,699.868,1075.09,151.461,-56.9798,4.9901,151.863,2015.91,1576.46,2987.06,10559,-1.08512160470895,25.7947389307146,2
206.015,470.799,1167.82,152.733,-23.5312,3.42577,-351.592,2264.52,1386.72,633.052,15098.4,7.01984784861502,35.9461536881918,14
124.085,114.08,114.855,57.0459,-12.7042,1010.3,2364.31,723.182,259.023,759.785,159.611,-8.60612704101146,-35.2661885297107,6
163.327,920.937,508.874,83.3273,70.6399,104.282,-148.687,1983.23,1428.15,1722.54,11763.5,0.413024072452924,28.8781675242469,2
63.6587,139.341,101.968,1048.49,20.8466,88.2428,272.081,830.822,184.335,142.982,3292.62,-22.6382531770186,13.8290159202916,28
8.45762,202.298,235.755,-31.3321,43.6677,158.131,553.673,60.7559,214.814,1358.18,-58.4239,-14.8669193130727,3.28682908113492,7
5.07625,636.217,457.481,42.3059,37.5881,-297.058,261.972,1534.59,295.143,29437.1,12450.8,18.8448892275625,-20.8147246244811,5
54.797,1289,564.92,-38.9467,32.6706,-92.1143,4.18859,2115.95,494.774,1013.59,15939.7,9.58173935662666,26.875475997489,14
199.917,318.591,363.366,82.794,35.9344,57.5128,32.6328,1793.66,665.623,1253.94,9359.3,-2.95094369468953,28.2734106724155,2
52.2773,704.951,713.82,108.98,160.886,15.4084,130.995,1717.27,669.059,886.094,10104.9,-1.86545411992387,29.3236444000356,2
61.6711,310.993,1352.4,43.4241,59.5099,0.762802,234.321,1856.58,4140.02,137.921,5138.9,-7.21196498486843,14.3198574769355,15
347.859,1236.63,342.347,713.165,-27.904,195.912,3757.07,639.93,-110.909,61.3085,4381.78,5.09089752796479,-38.1587836971433,11
37.1511,535.339,117.53,254.519,39.6039,626.973,1259.65,1829.53,669.176,977.656,2646.85,-23.1001009623196,-18.5351636601251,21
35.0924,308.659,98.2069,664.161,90.273,35.5435,716.647,104.279,437.448,137.084,4431.68,-12.4720777288408,7.56541545900861,16
81.3204,324.461,864.221,-26.7844,99.9854,6.94631,242.976,2067.63,2460.98,591.752,12715.4,0.938294591981114,29.9346308662374,2
-22.7268,1873.89,217.733,128.604,36.7133,46.0033,-137.826,1501.81,741.249,814.731,19112.1,23.4761331422138,27.8493304696446,14
172.339,298.647,0.297978,-13.5085,5.44506,139.618,2013.99,451.359,2697.86,6118.1,-583.85,11.02182698666,-27.3907859949563,17
113.476,431.82,242.682,287.057,1.59343,186.193,621.37,1427.41,117.687,1140.9,27.1418,-29.0148521676791,-14.3089482102204,19
124.174,250.564,582.166,40.5776,-12.6746,81.9139,1288.17,1430.85,2141.01,431.327,7922.73,-6.8505693998507,-1.45609827065472,6
121.244,243.458,504.957,809.989,-103.355,120.532,-200.406,925.811,197.973,98.7309,1938.13,-33.4176019837342,16.9241560393638,28
114.68,560.791,787.393,170.868,82.5091,-35.0178,755.601,2185.65,2310.39,6957.78,7576.86,9.67908658833447,-13.3436275143518,17
127.705,232.121,1193.62,-13.4321,24.5644,115.638,-26.544,2390.51,433.345,750.45,11296.2,-0.0700752148088185,34.6307396735531,2
439.575,1335.48,1305.94,284.039,-14.2362,47.2131,867.563,3300.44,1885.17,1262.2,16442.5,9.18751393909601,21.4996719290898,14
41.0977,209.271,190.996,390.509,60.2646,183.725,1089.92,333.399,35081.3,640.661,1265.19,-1.72879592499791,3.43961017322089,15
191.745,239.816,122.913,29.8952,47.1705,481.051,965.574,321.155,1939.43,262.075,333.256,-17.5972231064693,-11.9132676225609,19
160.797,299.383,68.4518,577.694,-19.9203,153.301,2250.46,1770.85,527.115,122.715,-21.2861,-12.3320558247148,-35.5513676013245,21
178.197,698.858,1249.91,-59.6836,58.1297,-175.637,382.531,1998.85,193.392,854.865,20242.1,20.1713972272247,23.0612900480795,14
251.267,860.965,892.548,317.81,-0.688183,-122.937,228.936,2260.16,1986.58,676.042,19845.3,18.2312248017288,25.0690412073313,14
125.28,1232.66,699.62,-157.585,108.408,-108.899,257.907,2501.31,463.631,1659.36,22828.1,25.7236318914563,21.3799394303199,14
339.566,943.335,834.089,136.264,-6.82309,215.188,-66.2128,1544.43,1657.89,574.829,16300.9,8.9845371971525,27.5918363137367,14
44.6403,585.998,861.455,-9.03821,56.9086,291.642,37.9703,2025.64,463.704,847.852,15222.7,8.89910649842514,31.8862383028535,14
53.5224,2783.44,683.947,57.1623,-25.3036,-98.4219,268.301,2194.21,1324.58,162.101,16723.7,7.06128796079884,16.816749647799,27
35.9345,517.252,993.565,-40.4712,119.367,-93.2821,349.169,2152.72,261.725,778.597,19314.6,18.9280889978164,24.5593150513313,14
116.596,185.983,448.518,48.7232,61.0035,132.127,4435.46,2085.07,1668.17,144.07,2779.1,7.19884001567009,-41.4088591284705,10
176.187,2638.53,780.134,44.8189,189.312,33.6383,101.929,2087.72,-118.655,710.605,19668.9,13.2948685390148,18.8325717781417,14
56.0247,6411.01,551.689,-39.3628,-51.339,-18.3387,582.976,1840.44,891.347,509.873,22172,5.15158126829096,13.3135392191107,27
1924.26,1171.18,1084.48,1449.21,-19.5519,135.132,-61.6989,2605.57,515.237,192.955,5954.36,4.05092889984811,-4.99111073332145,25
191.827,5087.87,595.206,127.546,-43.5158,-67.7887,172.111,2770.91,4635.5,526.408,11316.5,-1.48657341926331,11.4206969898723,27
200.264,351.289,626.868,118.087,-7.77622,-38.3216,143.927,1790.31,977.588,1084.43,16421.4,10.8358491045415,30.2106635117383,2
55.2537,492.218,134.353,36.1679,173.83,219.233,1140.93,42.6286,578.981,723.528,821.712,-15.3790697013286,-14.2053971553826,12
152.18,263.31,49.886,60.1633,-17.3115,1506.73,4770.76,1751.6,1011.78,1672.65,1924.41,9.53028600777656,-39.2786447616434,11
121.836,158.507,246.866,1043.55,53.1339,127.402,547.303,1280.59,184.761,182.804,1071.2,-31.4172945077438,-6.44227009892387,28
264.768,901.395,626.635,-36.7728,202.509,-71.6941,-51.3435,1969.43,24786.9,18655.8,13739.2,10.6199798678234,-7.05244780344735,5
96.7378,407.099,835.59,36.7382,114.634,26.8103,113.264,3221.61,246.576,836.057,16960.4,14.455570035454,30.0011123495603,14
297.398,543.087,171.005,566.689,70.0749,250.268,4114.53,1598.05,245.022,133.341,456.46,6.70145362076944,-40.0348480076249,21
90.4865,3646.54,811.705,-106.529,118.245,-108.231,174.941,2565.15,687.351,1136.75,14967.9,2.4997231402256,16.62338412747,27
140.142,294.663,981.74,322.262,41.3606,-17.9845,-54.1502,1996.11,8116.37,558.129,10182.2,-1.4178043320387,11.2962220762271,15
158.247,1628.88,795.304,154.269,-32.3377,-15.9735,415.896,1776.5,544.534,775.041,18218.4,13.5855278156248,22.003211753618,14
120.574,204.801,842.572,110.875,553.579,77.774,202.669,1986,57788.4,1199.96,9390.93,-0.574922341885368,1.94055271874916,15
136.694,1800.87,389.081,641.365,211.052,16.9476,52.5588,1682.43,173.154,13.0598,11418.2,0.938128904890199,20.5994500377369,14
150.335,1402.08,8063.95,1384.29,-771.62,-600.246,-630.525,258390,11486.9,731.663,18446.6,-11.3616214600306,74.9923917532322,28
186.675,300.022,220.618,-49.4113,48.5838,564.018,3758.36,2029.45,6149.19,532.303,728.107,6.60756134326558,-43.3927849318045,15
70.5109,1937.02,574.121,75.872,23.4171,-171.794,584.293,1957.59,998.711,1567.21,19621.3,14.5112995155412,20.0078554673187,14
2712.36,288.989,87.7408,36.961,40.8008,156.632,1527.08,269.195,1091.86,60.3783,518.172,4.3894744294211,-6.80316761047374,25
136.614,555.596,318.195,497.807,784.645,113.799,5515.35,-646.651,90861.9,1182.4,-295.069,-1.38039188131696,3.23832068929001,15
83.5077,649.138,578.932,-14.9572,158.679,-155.973,898.343,2104.2,2925.06,7802.88,14964.2,12.4106949692025,-8.07356730890383,13
46.3871,252.424,500.251,-13.436,97.7435,238.812,3625.46,1491.58,2460.83,109.679,2723.83,0.377075858973413,-42.0817910280847,21
162.636,856.271,693.019,-114.49,12.1808,21.1883,88.8046,1699.17,449.32,789.369,12459.3,1.63977605689191,28.2404347671357,2
608.218,251.49,111.156,586.552,81.0458,159.769,473.001,345.894,97.554,120.292,122.533,-8.40430038730411,-5.39911977865682,25
577.511,515.058,523.378,643.112,-110.493,219.074,-1178.82,989.378,220.924,124.069,1521.23,-12.6514127746531,-1.64955408057037,16
142.577,1038.56,568.268,143.622,-25.3795,87.9593,70.3057,556.337,2573.72,447.477,850.452,-13.6827881619652,10.6855344544482,19
307.116,336.233,128.074,744.356,-71.6366,34.8634,-93.5513,1069.38,188.807,143.063,531.512,-33.8304934811884,7.45281608597111,28
539.815,1267.27,815.002,552.768,131.044,1287.53,489.13,1293.61,1020.09,696.951,4659.88,-6.27423876858102,10.8679468638149,28
188.759,222.757,112.322,33.8436,192.202,118.757,1855.19,218.651,380.733,944.615,3013.95,-7.18082522675661,-28.7893001170784,6
126.055,342.71,97.3996,122.303,14.0971,170.159,100.112,1419.58,1215.68,3357.29,702.004,-7.00031748633172,1.94371642143712,17
141.284,335.187,547.523,-7.34016,74.0897,119.223,-250.961,2147.85,851.397,1401.87,13575.5,2.65292370519344,33.2104302323621,14
188.128,1515.39,42.2978,981.107,-11.2651,891.44,3827.21,444.623,182.727,5436.95,-221.485,9.26139585749639,-31.7580485509262,17
52.9617,737.811,446.668,328.193,-47.1315,172.774,-125.11,1087.64,599.26,997.648,13842.6,3.05203396572335,31.5478282624097,2
31.0582,785.496,1004.88,74.3542,30.9004,-175.434,100.804,1110.6,4808.94,307.404,22158.8,20.4076935649851,22.0605696792524,15
123.478,885.963,144.914,963.388,58.0039,1365.92,1265.7,1680.83,395.885,171.705,89.8246,-19.6124090473376,-19.2723239699025,28
155.319,312.172,1143.62,-19.2865,32.6012,111.529,-11.7115,2533.96,3536.43,185.947,9066.97,-2.89663975754195,25.9349092096096,15
89.5085,537.395,1161.23,14.9666,73.5613,59.2647,980.062,1666.21,23.1241,912.248,8618.83,2.41932199435926,20.715353640744,2
176.294,272.01,33.0984,59.1086,33.6291,518.363,4403.17,2275.16,1873.76,3852.96,335.32,7.45983118313984,-37.6761898562401,21
102.082,558.765,697.784,-3.40847,69.5841,202.413,367.678,2226.43,918.435,218.785,882.392,-39.9374343199193,-2.38280464362846,19
116.192,342.759,612.783,801.783,-90.0517,-74.84,1215.44,1490.24,326.191,562.618,15098.9,15.8543817612528,8.54824072587051,14
155.621,3702.5,35.6057,82.0359,164.32,-5.05776,492.676,2141.47,1233.35,1688.26,27929.8,20.1238280098889,17.0406428422868,14
294.382,1909.67,134.454,91.0378,-67.6561,1691.05,626.674,2227.61,12335,137.881,2729.64,-2.66686801681966,2.84216488256523,15
72.5733,729.61,1011.25,186.464,-55.5509,-16.0091,65.5198,2210.01,1035.69,3085.28,15938.1,8.93224368075064,29.9298364141161,13
204.799,399.351,210.141,45.9455,-23.9606,87.9338,5343.54,230.735,3342.47,192.224,9444.62,13.6891241471368,-35.5319179034231,10
-40.3363,264.462,82.6222,852.164,-85.8447,711.683,3500.37,2400.29,83.9693,137.887,136.772,-1.65961491268572,-42.0707943988723,21
197.735,822.113,534.222,565.693,-0.575156,113.466,325.457,1435.08,771.576,274.489,8300.62,-4.96076515160134,26.5684983609497,2
71.0256,4554.36,739.752,75.1938,-51.601,-81.872,443.895,1504.2,4094.47,10.8879,16168.8,-1.44939957199671,14.9007126038278,27
160.595,818.524,877.249,42.7123,77.7476,-92.8779,8.39623,2703.33,239.268,968.844,12216.1,2.25816675914303,31.8522125604423,2
45.2765,302.527,916.261,111.032,113.304,75.6618,-66.0996,2243.03,198.032,7082.24,9803.52,11.2271742996273,-5.32132395268959,13
351.459,2339.92,991.701,1549.36,-125.934,-45.1812,-1044.93,1946.73,-85.6991,253.079,19066.2,14.0605662730057,26.9010223555014,14
98.3029,233.41,105.802,-27.0108,85.3783,739.983,4538.55,1010.43,1480.53,196.436,163.403,7.64138105906085,-40.6176145015817,11
206.213,408.247,110.084,-128.407,213.261,109.821,2947.23,2707.78,9313.37,355.3,1566.92,0.739503821490815,-5.7173858786647,15
109.158,229.927,222.216,179.147,54.7757,-62.0949,2796.7,1217.79,-27.9945,6733.43,14934.2,16.4039106522514,-9.09891605336048,10
156.687,1446.1,609.142,-23.234,23.6628,145.41,1007.4,2381.72,386.147,769.622,5941.37,-4.90601290847892,13.2250280665956,2
155.289,788.657,1364.57,294.057,2177.26,-446.825,672.8,1262.5,178028,1945.47,16214.1,0.703824312762839,0.547428244921965,15
191.747,207.61,769.616,267.061,25.5575,-251.013,276.928,1879.65,1481.53,15732.6,6048.24,15.2761011947258,-16.8705663402343,5
57.1974,3132.29,749.366,90.6464,53.5108,32.5557,-125.481,1934.19,1075.8,1201.65,15962.1,5.50016068949387,16.8305661720939,27
136.626,1104.19,847.844,132.208,-140.357,87.2815,60.8335,1985.37,19788.3,763.488,15692.7,-0.376989747333393,3.57457032509535,15
37.4334,4570.68,972.466,-109.777,-22.589,-101.019,983.567,2111.86,3927.67,7899.01,9000.36,1.84411919012708,11.4824062839406,17
86.3772,404.393,782.105,85.2821,36.8041,110.525,982.368,1422.34,2.82907,1012.34,8840.62,2.38721529350461,19.7860748696825,2
95.0772,1896,748.252,-82.1064,52.6775,-135.287,635.127,1767.02,1023.33,505.668,21483.2,18.9891846928446,17.9517302169291,14
66.5737,6573.79,933.797,583.12,-28.6938,61.5388,65.068,1587.86,269.487,148.602,4708.89,3.62630628776254,11.3105043047161,27
148.548,407.627,1707.06,190.257,290.441,-217.998,-453.254,1987.87,30453.4,225.456,23240.2,4.26560182035141,2.74161347514664,15
230.289,1146.42,939.231,147.68,0.722643,146.582,164.849,2131.49,329.37,1312.72,17252.4,13.2009455807256,26.8556817604576,14
138.972,208.119,136.303,997.3,53.1613,191.185,141.727,22.8539,203.297,23.1658,3402.98,-22.9602218510616,16.1292017546213,16
221.614,273.88,154.769,1542,39.3791,403.618,4721.15,887.438,317.561,161.045,6109.83,11.4698150931217,-35.8911384291898,10
239.288,456.92,270.182,104.829,26.041,-73.5899,-130.693,1438.5,893.754,577.114,14906.7,5.96464319797403,31.4406770690759,2
187.702,275.171,157.669,1191.93,-4.84974,323.713,3070.81,913.453,-6.0503,108.966,14440.4,22.4382083945157,-3.2888117708854,10
349.419,286.831,185.17,725.316,-36.3513,168.483,59.4171,1312.23,599.564,253.618,1160.7,-34.7917366217437,4.62622894308798,28
609.087,340.38,152.975,992.905,31.3519,-62.6471,7370.03,195.034,324.63,362.929,12427.5,17.7158256422963,-34.2548830423254,10
106.206,3201.97,573.617,863.838,45.8096,-75.2132,481.637,1490.68,173.562,194.111,13360.8,0.692511934714919,17.3621221676075,27
845.068,929.812,69.0655,129.917,16.1021,199.047,8196.33,456.957,637.274,731.806,8038.04,17.2353621164115,-37.2358099908685,10
195.417,547.225,382.745,231.696,-4.38555,301.209,13470.1,1106.15,1316.79,341.271,15474.3,18.7933710233708,-40.3065382535196,11
44.0444,158.015,183.966,124.812,-67.2763,-26.3761,2542.51,201.305,1888.89,355.542,7503.32,-4.22911872367284,-36.4580451889869,6
131.099,249.444,159.326,1165.52,67.1821,123.642,-292.696,1521.13,-13.3431,296.376,587.105,-43.9348208481671,8.7781863579445,28
159.849,2899.24,-3.57176,118.103,40.4538,109.349,1169.93,569.845,235.497,2369.14,28328.3,31.3962500227344,11.136119376791,26
199.456,446.04,321.141,783.1,-9.86818,135.536,726.408,818.874,210.983,232.163,3739.33,-19.0876640717533,-2.5248963042188,28
218.235,581.51,352.465,664.898,40.5744,243.026,303.814,1910.66,152.04,112.959,638.137,-39.4575240961189,-1.16687530374491,28
199.826,342.682,213.849,85.0882,-13.7883,407.356,3376.53,910.274,944.429,903.949,12417.6,18.3084245609516,-13.5241849662776,10
87.3104,2250.77,849.81,664.029,-87.3614,-41.0426,385.81,3291.67,228.073,476.494,18853,14.4019406829685,21.016029933828,14
214.336,2289.84,872.329,664.718,92.0685,-165.681,1143.84,1615.72,540.681,407.758,21377.5,20.573641298561,13.895225384797,14
229.725,267.819,43.1956,226.663,4.19002,452.267,3628.58,1127.38,289.747,756.531,3161.35,3.59957974098493,-40.002896593076,10
96.689,233.678,78.8935,246.985,84.1813,1104.56,2757.56,1158.49,587.004,8440.94,478.874,10.0003641582591,-29.0492812106547,17
244.863,289.004,66.3994,659.92,53.1509,126.402,-206.286,963.088,-199.532,228.819,-34.9041,-31.3990441291681,7.81612548862155,28
104.486,691.635,67.7011,987.65,-2.77502,106.837,12.6019,218.544,-33.8052,142.803,565.521,-28.2095947809691,12.22177415431,16
124.33,532.702,1132.89,1413.91,57.1414,54.0624,-324.279,2062.84,572.752,211.832,10166.7,-0.856133720811636,35.1317140622097,2
281.531,990.835,427.517,778.6,78.2452,119.34,16143.2,948.091,169.132,126.777,1689.93,18.819174959316,-39.3023546484977,11
155.14,1372.28,401.316,224.616,95.9817,369.107,1396.99,1003.69,1385.56,362.565,3781.54,-14.41081879162,-15.6881368695597,28
301.412,998.317,415.973,599.962,2.84174,122.263,3813.19,2385.06,22.0342,194.345,1848.08,3.71502824274799,-39.8596004767524,21
-4.38308,951.747,655.163,652.491,42.9147,-160,781.892,1780.59,393.119,222.376,19683.1,17.9653243353022,20.6563149311274,14
77.1205,216.688,231.055,893.349,9.86078,178.977,3354.41,3199.4,360.818,30.4954,2337.36,-1.50081150260817,-36.9452939610629,21
249.22,424.562,89.3887,643.315,113.566,65.2546,286.28,118.732,207.487,240.523,349.36,-21.7788683385908,5.52213204504559,16
-34.695,905.384,241.212,1337.48,-4.98228,-289.728,499.101,1401.5,39.1989,360.348,17690.6,15.8398567336781,26.0053316267617,14
233.823,585.499,81.0857,7098.49,-409.126,819.103,3190.25,430.443,-196.853,196.915,139.94,6.36543392784735,-31.6245413719243,24
45.3686,2296.45,912.034,232.306,61.4796,-112.946,117.522,2065.86,411.123,1147.28,21215.7,18.564589611989,19.1440692690928,14
374.972,474.178,149.283,570.384,102.774,498.166,3974.48,790.453,289.95,1598.95,251.808,6.64299109423725,-37.6632041529504,11
74.2492,458.763,538.908,171.028,143.612,353.962,226.568,2097.15,1907.26,1735.32,808.612,-12.547506604155,2.65019904330115,17
74.8544,219.006,113.297,1114.09,-65.9893,19.3676,-26.1449,1685.16,-123.624,85.7132,294.74,-39.9604188388335,5.71657797948387,28
174.895,345.956,336.181,801.24,63.2217,-38.0665,379.434,2493.64,128.803,397.784,12985.8,4.61371508525924,31.8955791690984,2
11.1165,1863.74,128.838,1449.09,-116.717,143.291,835.515,301.905,9.07349,86.2643,1365.63,-7.61485520785715,8.38772281387661,4
100.476,355.69,277.396,797.701,-38.1683,187.382,492.076,1942.56,-113.611,186.775,1407.94,-38.2991583708288,-6.09671193686322,28
150.704,234.84,441.291,1159.15,91.3266,-97.6514,-893.172,1062.96,286.704,270.512,13866.7,1.06443577700548,36.1268170650157,2
124.868,907.643,132.666,1534.42,-149.309,617.405,7396.09,972.346,519.731,133.89,1860.55,15.9470091762533,-38.3558254506779,11
313.657,400.181,70.3176,3566.95,-182.572,442.562,11697.9,113.774,91.3431,369.874,312.116,18.5890773119311,-39.6358691373721,11
109.582,7560.36,688.799,578.079,-63.3804,96.4248,262.037,2267.82,270.078,142.961,5146.91,3.02184609952551,9.91262282049817,27
337.828,289.091,62.3622,830.102,-12.8716,267.084,116.194,2039.49,482.004,258.154,603.927,-38.0903245408369,0.399703805932579,28
31.0899,339.056,156.51,722.679,172.993,844.32,1482.18,1408.94,-61.534,210.782,1003.57,-18.7250051080052,-25.1014895634354,28
396.377,538.823,92.336,18900.3,-454.153,339.855,5579.28,590.237,647.837,8054.91,95.1732,9.36618926852811,-25.8564294006236,24
165.141,5541.61,21.9737,648.392,100.439,193.122,4902.79,322.788,106.664,121.784,19439.4,24.5379398877608,-3.08059608747007,11
120.822,373.639,104.79,914.334,-95.9999,88.0091,-77.4921,252.116,135.942,141.743,1635.83,-26.8750089521496,14.2285564573843,16
106.543,455.383,366.068,672.159,17.7573,46.5283,254.481,1992.43,383.343,113.265,373.055,-45.9710539882273,-2.58298336109971,28
383.443,514.199,833.653,601.022,77.9516,191.034,450.001,1852.97,312.223,379.505,7226.69,-4.93217266556363,25.2744408866968,2
203.522,418.158,407.693,1504.75,-76.7455,201.591,5353.66,1849.88,170.339,-6.25526,402.073,12.2869388343915,-39.6784513801471,11
830.086,276.951,83.3177,257.823,38.4603,265.784,3081.42,524.297,589.822,902.148,13696.8,21.7570869057898,-5.35869928255611,10
266.919,2600.32,260701,5975.62,-1055.1,208.279,8965.5,2934.89,-1173.15,587.016,915.319,45.0997821763111,-30.1062792116992,22
54.8314,328.532,171.104,561.045,-38.0634,139.465,1266.72,1086.96,224.025,215.386,546.034,-21.4566204400199,-23.4367263895066,18
281.054,266.492,175.846,787.942,39.0097,177.766,350.89,1809.74,172.08,504.178,1844.83,-33.496758155286,-1.78788406799105,28
139.934,2121.75,680.339,-5.87227,64.0125,44.5555,203.444,2356.41,621.124,830.96,19631.1,14.6076590807792,20.1526318111311,14
388.602,292.506,79.6161,1027.53,-82.3694,-48.2713,1305.61,739.352,283.581,86.9125,31307.8,29.8919311227413,4.74673147102311,26
313.213,358.083,117.586,84.0596,42.6165,365.387,5013.8,296.204,630.486,718.184,984.582,11.3061257282181,-37.7714981120668,11
203.966,172.001,128.67,855.438,103.861,275.519,4653.59,495.761,140.227,241.532,2108.32,10.0137917818836,-37.7412649125709,11
199.208,2532.25,233.748,724.167,243.643,176.007,1063.32,1796.95,682.968,645.724,6100.76,-2.6308347039604,12.5447741387046,2
150.213,361.852,131.683,620.136,-60.5477,1151.2,2915.85,954.405,440.873,956.14,11900,16.5375960182054,-9.91344842274703,10
194.867,475.744,224.643,699.737,3.99462,1509.69,2781.29,714.678,-11.9378,304.847,-60.6998,-5.06447874746184,-38.0589785721924,21
238.901,371.457,481.561,17.0278,3.60705,14.2181,216.836,936.804,903.775,350.897,15907,9.60590014786658,27.239354300643,20
148.507,1154.64,665.764,1969.93,72.4565,7.41164,382.339,2678.59,386.553,459.062,14467.5,8.07230350068789,30.2754413915847,14
75.7363,227.097,157.978,611.214,11.7937,-6.70326,266.642,1072.88,-26.684,266.306,1452.95,-33.6603304559429,4.57640005173219,28
127.96,291.188,52.292,703.599,19.6295,110.394,486.08,760.976,-53.5576,68.7771,1343.58,-26.6615422501674,-0.97619011318338,28
129.175,643.653,830.262,666.136,-67.1401,-235.566,673.301,1932.79,-11.5427,295.822,22114.2,20.9584351432851,18.4906555875134,14
148.383,597.091,198.914,34.0231,55.065,389.166,719.522,198.129,381.49,743.512,1451.4,-14.7373251593201,-0.0874051759818885,4
172.449,699.961,141.717,759.678,131.33,-15.9498,3244.91,584.138,165.436,369.097,24324.6,24.9304384898355,-0.817590542397333,10
230.134,2472.38,722.687,793.245,-31.5736,-91.6988,368.602,1662.47,650.165,932.181,15126.9,1.91076316084801,20.3986927494228,27
173.812,217.199,137.947,1025.78,-88.5438,635.412,6149.69,358.545,302.186,103.45,316.828,13.7514468323483,-39.3308649367152,11
88.5077,1517.41,1735.95,2316.19,-188.966,67.1249,-44.8357,2809.72,-241.212,266.644,6878.21,-8.73680198523361,29.8755333678597,2
299.086,404.959,84.8058,19461.1,183.17,27.3781,1581.59,642.926,537.938,24084.3,1412.73,8.32993048612848,-25.0693804265729,24
386.146,293.11,101.071,642.953,11.3187,203.935,3643.23,850.457,139.602,10.166,1194.55,3.67851375432213,-39.3480949550532,21
291.19,331.423,48.1305,154.217,-17.1276,561.015,7242.64,691.074,401.716,2772.34,3584.82,14.7940825190532,-36.3829341260947,11
404.202,1119.39,665.546,576.648,26.9262,51.9721,645.79,3026.12,595.732,177.345,13038.9,4.88468695441405,24.6786629445324,2
311.737,210.742,36.4213,655.252,75.1724,88.6189,6018.64,652.529,-21.1923,237.835,1633.51,13.8721544087338,-37.6205925522939,11
159.516,323.452,1003.82,654.08,-23.3522,99.7497,272.94,2738.34,888.619,97.9655,834.467,-39.5358576292845,0.73288649082875,19
156.158,385.231,169.256,-1.26699,149.749,44.9899,139.119,376.914,162.188,2445.12,3498.27,-10.6397509881938,6.53885051436318,7
166.277,377.644,744.445,179.958,-41.1265,97.9291,445.698,1867.37,1118.67,885.479,9767.47,-3.15530840039415,30.3779299072018,2
150.762,2098.65,13.7364,767.265,78.9145,115.826,634.74,376.95,15.777,192.381,1779.31,-5.42426576154454,13.3184715710022,4
167.652,143.188,179.58,726.636,52.7743,1400.6,1824.22,28.7172,287.773,324.463,544.648,-11.611047477594,-27.9173167457102,18
120.218,1508.56,1193.82,615.816,-13.1063,-31.6273,365.366,2192.16,131.361,180.439,10966.2,2.43008076211578,24.2181000720352,14
624.463,2252.44,19.8503,237.827,71.753,258.913,57.667,323.603,977.578,588.305,5520.5,-3.99140886439668,15.4626246987225,4
124.984,353.578,385.512,721.428,26.883,-8.5217,335.857,820.08,479.005,227.152,18175.7,16.8269007104127,25.5270803432105,14
177.209,325.693,82.601,89.9938,266.034,206.238,359.425,152.216,943.047,604.448,361.412,-21.7581919947493,4.37116010220435,19
93.601,241.233,305.424,647.483,81.0757,178.592,176.72,2518.47,43.2912,465.177,2131.81,-35.5995287961779,5.34963971115623,28
183.875,1045.55,902.325,555.022,49.4311,41.6162,353.643,2533.12,439.502,460.531,5459.34,-5.89155186556829,24.3237088270455,2
180.566,289.458,128.244,109.069,44.9183,191.825,230.225,2441.41,745.089,1091.24,1041.32,-40.326645757615,-1.34192549350293,19
185.341,826.741,74795.4,863.456,-208.551,106.019,73.407,2575.33,740.193,-149.956,13546,35.5909105809737,-21.5030239318697,22
170.442,269.136,322.548,756.299,-40.5746,119.142,1726.83,1700.68,945.631,441.22,278.795,-20.7326455686975,-25.7292462856134,21
263.868,355.598,102.239,719.532,-5.58459,117.26,910.731,243.085,233.042,135.231,4848.06,-9.03218833013893,-2.75620048874321,16
110.721,7283.52,404.624,565.185,26.9599,167.821,177.869,2852.05,-128.84,276.942,1905.01,4.6508330304028,11.2011744288354,27
632.91,529.976,32.2128,19789,-780.698,135.372,2015.7,659.97,204.227,23329.9,-1069.89,7.21969025896421,-26.4298146137261,24
809.389,1009.16,245.499,688.292,-61.4781,13.4715,1112.32,1335,457.687,163.567,1253.31,-8.75418360461394,-10.4415177033847,25
298.516,312.317,27.9385,605.124,74.78,406.001,2895.69,488.197,175.914,95.3083,364.338,-3.15694709815282,-37.6038633431614,21
51.8695,243.634,264.084,1169.57,19.5955,72.2078,466.718,1255.48,322.051,102.83,4005.24,-27.0941745422353,8.72404866622393,28
301.609,547.574,-8.68786,41526.1,-1509.76,2942.25,10135.8,1293.72,-465.527,1425.81,2557.4,9.97726122559239,-28.9860912185976,24
-11.5248,447.691,353.976,2566.83,-36.4412,103.969,-18.0514,1351.83,100.06,220.462,2096.9,-31.8812250357117,8.62991805709686,28
195.853,354.326,693.13,-120.093,143.171,122.508,896.581,2931.66,1094.8,760.758,10438.8,0.220208149207615,26.4570689718538,2
120.881,301.675,64.8358,724.056,43.0692,-150.723,1568.92,205.795,-53.3559,276.252,30010,29.6478544561031,1.96729554184806,26
319.779,1403.53,59.3512,590.539,48.9444,256.964,559.612,230.183,-35.8495,74.5996,3488.71,-6.98507639451481,10.6169382688628,4
148.843,745.222,1366.99,-44.3755,49.836,-125.087,116.347,2047.61,891.327,434.664,23246.5,25.8947401778625,21.8650430846626,14
26.5415,354.988,116.852,1447.42,17.2958,855.857,1828.57,392.181,50.8927,251.938,134.984,-13.627561761213,-29.9099200700892,18
484.837,520.689,1170.61,54.3082,-25.6628,-371.54,668.045,1790.73,2105.58,2491.49,28620.7,28.5180848662354,11.6293647997879,1
177.173,943.479,80.632,750.113,-65.1803,697.997,14446.9,1010.95,191.989,236.653,3278.59,18.406242806104,-38.5510659176506,11
435.264,561.738,48.0677,-19.844,92.7997,-152.865,1741.72,258.855,387.515,804.421,23746,25.1432969859378,3.33038187709332,20
121.98,544.075,27.5071,2395.31,93.9704,284.856,206.496,260.988,205.485,17.7002,726.158,-25.9842069464624,5.65484007589235,23
63.3498,269.806,15.895,731.652,-1.50117,226.941,1695.75,1355.7,-212.762,333.343,43.8381,-17.7387119961973,-28.5359782025952,21
330.813,1053.48,14.4126,2679.03,43.8965,111.89,332.938,306.559,238.886,282.383,4581.66,-10.6007663594503,9.28758249251585,23
319.968,312.289,-13.04,2171.5,155.323,38.709,5307.35,496,117.793,208.987,5929.71,13.1452778229454,-35.2640652919734,10
176.507,1358.84,115.536,843.755,-109.622,-33.6434,1695.08,124.128,233.623,161.676,16675.1,19.0105395306555,5.33145257721808,20
254.727,1372.1,1496.52,325.913,-46.0945,-104.339,883.757,2556.36,1045.46,224.475,20755.6,19.1875921925541,17.8278785188926,14
125.998,299.616,84.3091,136.111,9.90287,164.424,2051.22,348.085,299.458,1185,9032.29,1.6195635281978,-19.4725405696763,6
267.131,972.485,1264.91,222.954,-80.4192,-14.8977,1189.69,2895,324.579,736.547,14284.8,9.44509528397539,19.4553319687024,2
184.619,300.711,258.384,662.834,-101.1,426.076,3781.9,2213.1,118.426,441.891,87.8684,2.67803887634515,-40.9224061413957,21
126.68,391.824,118.012,597.678,10.8939,114.63,742.369,1622.42,246.565,209.506,180.239,-29.1838264452016,-12.3127417887662,28
178.494,485.06,-1.25226,217.135,22.3805,364.543,-57.6891,1964.28,1093.19,539.504,1831.74,-36.5912841651386,6.78964029573429,19
120.056,216.579,78.0398,754.056,35.6587,148.358,20.4477,1716.08,111.184,325.3,-59.2787,-42.0007677187918,2.71506512522458,28
382.232,230.782,146.873,733.117,-3.01482,526.348,1204.67,139.249,327.859,-93.4142,1519.35,-15.6075493333886,-17.9968176635439,18
180.143,341.684,105.686,762.591,82.1696,179.962,2.02664,779.683,9.03452,339.572,501.505,-28.0611886126348,9.40294743866107,28
96.2669,192.726,154.498,720.506,-76.3955,931.172,2519.62,988.31,201.19,107.638,2006.01,-9.51064742318207,-36.8806143127537,21
317.465,1040.83,1382.95,270.075,123.761,16.9651,1316.18,2829.73,818.813,706.759,13607.9,9.75232367761676,19.2635145115801,2
67.1996,1233.82,49.1669,1809.73,35.9373,64.3996,274.868,67.3004,233.011,336.923,5398.82,-12.9422771588687,19.6792669459608,16
109.646,414.201,188.485,588.228,53.9972,205.907,305.067,1134.75,125.286,139.963,2615.47,-31.2847181443134,8.62799642490208,28
148.297,1502.63,1323.8,1256.45,-20.5752,214.998,-56.3857,3068.26,407.471,275.263,16659.2,13.0296948894946,28.8483205518626,14
216.326,806.827,1049.16,65.9547,81.186,-62.1995,532.943,2561.8,139.992,726.402,13490.2,6.25904042526056,27.6909259789044,2
2241.67,1687.63,-25.0174,20071.2,197.136,584.557,1040.25,686.634,27.3348,7676.96,171.485,6.37486321436843,-23.672640161894,24
1798.31,423.733,42.4407,48.9322,65.7205,574.577,276.626,142.222,951.746,700.253,1779.55,1.38916156446592,-3.14335127728816,25
225.374,710.125,90.0834,1263.13,34.0549,172.615,1048.37,191.564,319.508,53.4624,13100.5,12.1419947602219,9.14360958549169,6
119.317,326.744,273.837,896.348,-39.1129,215.295,592.069,1893.62,137.627,339.065,-145.449,-37.1677242780355,-10.3653227885114,28
146.812,2047.12,115.309,-2.62515,272.084,53.8565,1016.71,222.426,616.066,936.359,7019.85,-4.43349459726841,15.9598452793402,20
190.543,384.387,198.896,359.113,-28.147,339.744,-48.2075,2193.69,879.357,877.778,183.693,-42.3637227957534,1.54681531389987,19
249.871,894.301,87.4202,81.9483,0.33365,65.1912,283.974,-51.137,1817.18,182.312,6569.02,-8.49697675246332,17.1068741261082,19
-32.3432,1728.83,1159.37,726.041,-29.244,-88.6726,193.135,2248.04,508.456,127.221,15170.4,8.46578124482944,24.633015676954,14
265.539,256.035,162.03,670.101,35.662,394.03,8190.77,655.758,248.524,170.383,4325.16,16.9727004290344,-38.1126979360196,11
873.443,2444.56,1535.7,375.861,8.93974,3144.29,301.638,723.912,3296.83,2761.6,1742.18,-4.74672688284073,8.19840055919615,25
885.29,399.438,-20.6565,551.794,-54.5006,90.1684,4347.36,665.421,147.419,260.703,22914.4,25.932035033787,-4.87144551907739,10
611.708,352.803,116.941,123.584,-22.6034,-147.361,3487.4,823.658,7082.01,14028.8,2724.11,14.4081083641717,-27.6776603983384,17
141.069,1026.28,999.61,1278.8,-99.4702,126.265,316.083,504.412,318.29,321.961,14743.2,8.08169144761453,27.8915185870353,20
146.382,889.011,860.778,9.41757,52.5896,-128.248,61.2278,2263.56,1091.04,-13.001,22225.5,25.3079970075918,23.7491642524166,14
176.182,722.428,13.6075,793.679,7.43769,95.5309,1705.14,586.523,380.193,-72.3617,5492.81,-10.4778832139716,-27.9667303870788,6
343.75,537.059,59.2937,1822.24,-10.5849,753.718,3139.11,1066.57,305.761,2176.24,102.803,-2.00930723833699,-38.8043238648389,21
81.3518,2279.46,31.3468,620.692,-54.7218,-8.36084,855.448,390.91,391.45,224.317,23714.2,24.4700964167056,11.8847741369962,14
87.2673,181.248,52.1594,674.227,47.7156,648.857,3098.75,435.62,235.209,184.471,1820.22,-1.62429238228962,-39.4492445922682,21
90.4161,280.039,168.374,1438.37,3.94184,80.2599,4060.08,337.973,295.504,236.826,20457.5,24.0120982990964,-3.68340786218698,10
354.366,1241.82,85.6555,915.18,-9.44765,1068.83,1514.95,588.947,97.466,397.416,1429.24,-14.1080231495732,-24.5877445905037,4
150.136,14902.3,509.92,589.866,67.1833,31.3544,536.299,2956.26,-89.4135,478.327,10975.8,2.7148620565247,9.35350238262598,27
298.138,547.104,983.586,-50.5458,-34.4044,-72.0264,564.841,1700.63,1434.86,551.65,13370.7,3.35698636781049,25.5523081569903,2
166.725,1781.11,685.017,177.372,-8.51921,-138.154,651.213,1475.3,1188.83,1180.58,22794.1,22.1232031356667,17.4427759001423,14
76.5916,244.894,288.192,759.624,23.1005,174.48,118.044,1480.53,184.623,149.574,330.198,-42.1392455577154,2.82903627180315,28
-27.4665,149.351,187.614,1220.68,79.6603,416.007,1043.6,794.007,-49.4492,284.837,490.388,-21.4948598907183,-16.6356597526604,18
259.781,208.99,545.107,592.811,-41.9583,179.349,1840.76,1453.73,98.4281,119.06,563.773,-15.5010618596437,-31.0900960955631,21
127.417,559.891,461.407,609.931,-70.9811,-103.756,443.732,1429.58,355.744,276.964,22707.4,22.681922239239,19.810035989253,14
696.238,339.206,115.681,6575.67,-191.567,266.318,2922.45,413.276,79.6185,780.634,35893.1,30.3369075018954,-1.95083040609526,24
183.484,310.936,145.818,201.782,1.69708,1385.15,5603.79,1729.31,797.757,1050.33,-146.141,12.5640984430173,-39.2926461647775,11
172.342,3412.49,756.302,69.7759,259.522,-105.447,498.534,1821.62,899.491,1192.97,25215.1,17.0773427443544,17.3811167905688,14
193.432,236.647,181.967,751.932,-56.1315,240.411,710.602,2780.95,382.358,456.691,243.47,-36.2519159896936,-10.646328789752,28
141.148,1308.41,625.373,-1.23463,-10.3931,-184.864,491.906,1871.91,391.664,791.801,25386.9,27.3790345122986,15.3294529725754,14
290.477,472.1,389.183,636.158,-30.6079,289.392,2619.9,1500.67,13.4068,127.649,2258.54,-7.89164388155815,-38.9850278130323,21
212.452,523.899,9.29531,1007.71,22.2598,380.61,1571.06,420.16,315.488,226.372,10190.3,7.95874085040463,-0.84935771742949,6
362.191,249.719,189.611,681.565,97.3719,788.471,2846.99,1349,261.422,309.883,1565.68,-4.79121637160685,-37.9842351059251,21
89.9923,500.281,599.023,3309.74,561.374,-422.116,-281.83,-20.4965,132384,1304.34,12140,-0.53103634068237,0.948119971168683,15
102.071,817.065,37.6987,1594.77,43.6872,78.8855,-379.421,189.081,217.679,32.1704,13147.5,-0.738037737239515,32.348418885223,20
56.3086,970.544,746.837,95.1748,-30.6658,-63.1855,207.736,2253.44,916.555,-74.8003,17613,15.3541716518285,26.4110343653339,14
964.999,3183,109.929,765.347,-79.1658,653.035,554.119,175.126,302.984,159.854,69.7051,-5.3061311628323,6.73241811046686,4
84.8921,582.757,531.585,222.784,84.129,64.8886,952.972,2323.24,635.453,1487.47,10070.2,0.629779261003037,26.1165931723182,2
179.997,1257.41,568.704,671.657,-38.2521,-63.546,183.151,1407.16,170.293,338.065,17768.5,22.4239452240044,29.7597796452483,14
239.321,907.26,-3.36089,31769.9,1199.9,744.914,6539.95,1088.61,-298.019,26009.2,-1834.08,9.06773776619869,-27.4472008150364,24
148.781,205.055,37.4548,576.005,68.9753,370.447,2780.65,358.957,-42.5452,160.793,1009.6,-4.3857823850002,-37.367580246759,21
188.809,299.793,64.3024,3025.83,-172.786,514.782,2041.07,137.276,460.954,12512.2,4167.04,10.0355534494046,-21.5030152362526,5
527.026,311.784,28.6353,1241.48,21.0585,1007.07,2068.87,315.512,182.835,135.615,1002.62,-9.94609891059989,-30.2344025907615,25
33.9,1040.9,207.851,731.817,-144.201,-15.5476,74.1465,1350.17,-0.77952,104.903,9141.13,-4.40909189207805,28.3288080065318,2
118.826,400.474,354.432,554.715,7.28508,71.4007,139.595,2110.36,-160.736,333.899,1306.55,-41.1717961791988,2.30743809612403,28
266.67,720.335,76.2802,179.813,-42.8897,-20.3783,3806.53,318.288,448.899,833.034,22821.8,26.5889008307592,-2.67216667284311,10
119.331,962.495,492.409,324.818,-87.9281,-134.428,1230.47,1546.99,886.889,325.003,27713,27.4387514169384,9.23902144409857,1
263.915,489.882,116.471,10311,266.46,-431.86,4709.12,871.614,373.541,2236.41,48404.1,36.5654840374085,0.380409048223046,24
97.2718,446.473,118.519,314.124,32.5934,113.706,118.469,1145.4,759.373,1020.69,7089.17,-9.96679019272349,27.0045997933341,19
145.462,459.32,446.997,963.113,148.828,99.683,-52.3257,1580.13,306.432,209.894,1174.37,-42.4451851511045,4.95098163196795,28
332.278,333.933,149.037,567.592,24.6143,182.173,-69.9059,944.061,131.108,229.865,3118.56,-21.7476114599775,15.9855417841853,28
188.812,204.365,179.739,985.948,-74.7889,108.306,2079.05,993.431,43.8394,183.47,7785.49,-2.91634382428851,-22.8491016083731,6
293.397,921.922,832.55,439.076,28.9185,14.5376,2209.07,1529.99,4425.59,799.968,28858.6,24.2879079514233,7.14645576396402,26
254.593,369.112,91.4369,1068.5,-33.2065,-19.3108,6749.8,297.363,206.745,324.112,10182.4,16.1375998191437,-34.8153178366374,10
142.715,1110.06,645.876,155.763,200.971,-190.71,590.125,1569.89,935.062,432.858,17633.8,13.3807443587271,23.1251575577251,14
22.0586,1537.45,102.045,2292.08,133.172,8.04084,-204.681,498.918,17.7943,153.179,1021.22,-19.4069124969732,17.4234169020954,4
144.189,4206.7,1130.81,-66.0111,74.3854,-255.272,211.357,3217.23,-19.7559,998.838,20127.5,7.50685883488194,16.9312875922485,27
94.2974,365.268,35.8972,725.098,-52.7354,206.782,2528.12,311.651,126.592,289.772,657.218,-7.11684954127842,-37.3417024313645,21
111.718,730.878,957.054,75.2332,-14.3693,-21.3076,-164.499,2121.18,865.978,1096.46,21192.2,24.0464750219731,27.8603669847273,14
183.9,2869.7,654.711,1185.48,-28.7782,-17.4916,577.346,1945.49,286.462,445.597,26508.8,26.66433758752,15.002566324221,1
209.764,229.724,344.857,1.35,109.335,376.107,5010.76,1197.3,883.004,741.091,2201.46,11.3593647591116,-38.5939369191878,11
187.811,1191.41,1540.35,655.444,105.81,-199.895,357.561,2918.82,109.714,255.061,21937.3,23.2091742956195,21.2146300079908,14
336.737,672.59,66.9111,1207.26,34.8665,-191.1,2252.08,373.757,225.075,252.678,30004.3,28.2437093700042,1.95107930583677,26
177.598,487.721,409.595,107.746,78.0608,-33.5836,4608.85,1407.39,2015.54,3544.35,2960.97,10.4792137510767,-35.4774845677033,21
243.608,952.238,901.317,766.802,-69.5385,-178.394,735.515,2194.48,401.506,74.6304,34342,32.592267734921,8.34603129156102,1
182.716,3119.55,14.2798,580.334,110.927,-90.0547,-86.7377,351.996,421.62,388.59,14175.7,0.60975558275506,16.8631937209793,27
485.194,373.614,15.7117,811.726,-38.1871,80.572,7296.08,523.441,119.837,252.52,10834.5,17.0935427132684,-35.16555425732,10
259.51,171.855,39.403,1177.63,185.96,238.565,869.864,407.819,245.461,379.268,-7.95421,-20.5831287179378,-13.9227189557422,18
329.587,2411.22,23.9037,1124.81,26.3933,179.995,607.044,495.263,-283.596,204.426,787.643,-5.88374944570442,12.4004755764804,4
244.737,819.404,121.287,80.506,88.4452,199.451,1462.82,1134.66,296.332,1933.19,3969.61,-8.82322169367245,-20.2954836368707,21
155.12,345.282,137.776,4959.1,146.819,264.573,4657.62,1169.78,272.812,34.8417,4608.02,9.6988475650803,-36.0660100901989,24
242.083,337.816,-23.3084,5530.05,69.7466,1390.99,790.694,381.813,75.8687,238.408,453.856,0.477458002340072,-22.4088802825272,23
139.168,4171.27,88.2832,52.9739,17.4399,22.928,2093.83,157.224,338.968,1873.27,20114.6,16.8963142087735,5.71561188106264,26
127.346,387.842,117.173,45.2276,84.146,99.4899,1732.07,188.033,518.826,755.899,9185.37,4.38999917206907,-10.5518717415505,6
115.592,787.395,690.222,71.1004,1.87723,112.005,359.9,1993.81,910.647,781.685,15678.6,9.42228576284733,26.8272965364218,14
20.2922,2071.36,671.59,-6.71376,232.402,-147.578,658.388,1987.7,891.223,270.455,17340.4,8.85047028096978,21.0707581443602,27
203.213,189.442,51.2952,65.1468,17.4069,392.489,2436.39,401.671,480.73,3685.75,525.376,-2.87953225179548,-31.7399580035398,17
186.38,849.835,613.548,96.2791,69.6739,-137.125,-174.98,1214.01,882.993,661.455,26341.7,31.415061063988,21.0082705892602,1
144.351,2700.74,283.852,774.675,61.7446,35.038,687.547,1475.78,513.699,31.2814,12980.2,6.54271627158207,18.0961323105315,27
264.165,347.85,440.253,612.903,22.5706,-62.3921,1217.32,1915.63,468.015,417.313,13422.4,14.7436447297286,5.99047051364421,2
3375.89,1371.85,178.892,26339.3,51.4263,43.1516,4022.8,872.24,502.332,2875.18,10171.7,8.89810235242804,-21.2852471560981,24
120.956,1693.15,331.451,604.598,155.238,94.3647,-268.846,2197.54,-29.7605,280.106,3188.37,-10.2239078246178,18.7124104678059,28
70.2002,1040.9,662.721,370.68,-39.081,-20.9426,280.954,2021.17,440.633,1325.14,14974.8,7.80285038745008,28.428806664908,2
122.645,228.526,122.818,972.742,-65.1418,95.9127,3015.84,487.297,143.522,18.4096,728.278,-2.81778298954152,-39.4735190677454,21
149.793,241.912,125.155,607.506,27.8363,107.924,732.321,900.741,214.029,231.621,1549.82,-24.7356152148027,-9.76978448917973,28
102.389,213.137,97.6187,792.318,-31.937,137.274,543.062,1187.35,196.257,200.552,373.149,-31.6369806667202,-5.54063997419796,28
148.656,236.84,222.394,565.426,-13.3494,843.596,2451.55,1214.97,264.182,94.9709,5953.64,-7.89815610716116,-37.7332323015812,6
153.691,675.66,495.768,630.939,6.07123,139.751,126.915,2649.89,186.21,262.266,1381.62,-38.6875998810824,4.55171032543739,28
468.394,355.549,54.1273,588.707,13.1328,239.471,492.062,650.54,14.8074,-45.5409,2407.03,-11.075176921342,-7.93252155105377,25
31.2168,750.134,149.032,-19.6347,18.1609,737.01,1557.85,133.5,1144.75,1019.3,7879.33,2.47734209440629,-7.76023812839624,6
217.649,1597.8,911.156,134.449,95.0224,55.0461,-209.11,1618.87,946.856,267.539,7660.35,-1.36440896709766,20.5477713415398,2
187.616,443.934,203.649,184.672,-47.4291,160.04,898.61,1206.15,983.297,1655.61,2791.66,-20.9914252323774,-10.4575396374065,21
160.467,560.006,84.5341,1645.92,-38.9613,1135.56,5975.34,2325.47,37.4142,3041.98,283.278,13.7247330489614,-36.6628656952269,11
200.568,3316.95,723.163,351.913,-111.462,-153.037,592.486,2124.95,1167.51,636.86,24849.1,18.5712285056971,16.0817278684813,14
207.634,1060.55,186.656,7826.26,214.217,190.137,1899.64,189.675,288.019,3934.6,1291.2,6.35694691132854,-22.983157614321,23
92.5923,956.282,947.625,38.8849,-1.26767,-60.2094,272.855,1471.31,661.431,1082.73,20453.1,21.279537768368,24.2377433829556,14
145.256,568.152,854.145,65.3496,-20.5123,18.0502,371.446,1952.45,981.111,521.479,10137.1,-2.01896288995875,29.2400151186906,2
114.584,1687.97,261106,6795.51,-1663.96,-194.897,5694.43,2144.34,43.0947,-173.002,18625.2,48.3010696000112,-34.8922225578066,22
418.665,479.216,226.403,564.785,155.32,389.159,2904.65,799.893,121.26,306.408,1227.21,-2.75273526254792,-37.0548004001281,21
382.739,570.887,574.823,92.8489,138.905,-130.948,-75.409,2384.47,1371.73,4155.66,21760.6,18.2722644606549,20.8256973599881,13
36.923,1866.66,1249.25,6.58568,-26.953,-32.8986,566.947,3760.42,971.822,71.3688,19141.8,16.5520295237103,19.2879436318715,14
181.118,2374.04,71.9379,161.824,33.7126,722.117,1266.65,278.78,201.943,711.36,15310.4,13.0657460395183,8.45238385641965,26
442.484,247.92,132.009,566,21.1365,-10.4257,1606.13,59.0086,325.377,210.064,20364.4,21.3194084136215,4.06898479764117,20
144.528,207.704,217.428,663.566,48.8262,164.219,-116.557,1958.21,158.866,257.826,1040.61,-43.9320204200939,5.35791041266516,28
243.128,541.87,58.5819,1821.18,3.63946,210.736,6036.28,696.678,5.72448,324.692,243.375,13.8451620813676,-37.3563247438159,11
175.51,1501.76,992.948,28.4968,49.5701,-107.452,511.131,2131.3,492.112,808.039,19640.1,17.6248598613912,20.9659223839673,14
334.199,2252.43,1882.7,216.326,0.523633,-12.7586,-52.7235,3880.4,911.601,232.399,18275.9,12.7327870289777,21.4982828733342,14
183.958,201.567,67.8893,1503.49,-59.0094,342.046,1809.78,576.585,72.941,110.567,4323.96,-11.3537797499144,-31.3144838705963,6
317.959,3952.38,-8.56851,2207.05,-35.4623,-5.87339,0.429563,144.921,32.1163,55.5693,4332.98,-5.27532396509779,16.7192179401771,4
137.715,245.929,148.549,3028.25,-138.301,173.45,-191.179,456.249,-56.083,101.521,295.093,-24.189882453241,1.35021204920018,23
213.113,1002.07,-20.5076,58.0335,62.0864,-123.616,6111.29,324.6,418.917,703.527,27718,27.7411272359696,-7.89579950402585,10
155.994,882.763,959.249,-23.0319,12.0847,-145.094,-173.06,1965.42,870.119,1573.14,19785.5,20.6118204014067,28.9635612531836,14
123.832,390.667,607.091,65.3383,96.4928,-116.943,-70.8898,2597.76,997.893,761.246,19068.3,19.2679012964406,29.6450811248178,14
407.056,850.28,137.392,125.769,-9.05056,126.871,4953.57,702.624,1403.5,1242.57,36480.9,29.7940947923209,-5.31842883951203,10
158.305,360.089,130.397,816.483,125.081,136.188,684.774,-9.88481,535.176,311.524,4290.42,-13.2912851700161,4.54069251990472,16
145.28,410.048,93.3287,912.217,-48.258,435.829,3503.41,82.6219,245.595,155.7,777.019,3.25985226933873,-39.0266393622138,21
205.151,507.208,57.2117,4055.54,-100.32,339.548,5137.89,1073.46,44.4233,5517.69,1389.55,12.742799923528,-33.5864911303215,17
192.392,545.247,242.792,1616.03,-1.32389,278.194,1997.99,332.552,613.776,14243.2,7.95157,12.5745702749114,-24.6408296709453,5
194.513,981.878,87.7169,1769.52,52.5141,839.371,-395.162,252.871,17.7239,249.143,2880.5,-22.547227758144,19.1072466281253,16
32.5994,1853.34,1485.41,-143.396,115.394,-68.4266,348.157,1922.87,771.77,1226.63,26633.6,30.0125164927392,14.2628651798812,1
208.847,206.854,236.152,621.635,38.3864,141.522,157.502,1509.56,-131.453,264.429,147.884,-35.5403975483416,2.21397275701011,28
141.832,261.975,156.176,151.177,38.5811,296.549,896.774,773.276,1027.85,118.278,1364.29,-25.1119151322036,-9.18026571012878,19
158.173,415.812,41.3856,1445.63,-79.8447,480.792,942.034,803.895,34.7094,281.103,327.746,-22.5824635119911,-17.1361243466419,28
141.275,365.107,62.4495,138.961,1.28611,153.65,1010.84,595.176,894.974,2020.78,4981.02,-14.0476157644835,-6.86134636210828,12
116.738,996.597,356.597,1017.94,143.802,8.82821,-70.825,1631.47,205.289,219.258,10588.8,-1.30535541114311,29.152309266823,2
131.737,193.362,144.791,2084.09,-17.0479,613.261,3209.07,1066.93,448.479,179.851,222.71,-1.54061402343525,-38.4067122400045,21
690.521,799.195,94.1632,445.923,55.0748,343.615,4553.94,528.282,231.542,2196.94,792.331,9.18446035420999,-36.1315395302586,9
283.829,275.841,545.014,592.936,6.22985,221.796,568.593,2998.24,154.855,537.739,3359.3,-20.9306637359734,8.94839976313451,2
212.688,538.657,697.196,853.327,22.5455,-33.3872,5238.53,1044.92,769.202,395.777,29006.6,27.3110781131124,-5.5197664928836,10
216.709,1804.88,1059.87,19.6623,77.4375,-214.001,273.51,1505.89,1019.92,563.734,20272.7,16.7597663686428,20.4140280945029,14
154.391,2025.65,1328.24,585.444,-37.4579,-147.645,285.557,2683.3,538.414,167.038,14362.5,5.23363351965773,22.6559681988703,14
224.346,4287.71,552.766,1076.05,-53.3661,-25.7318,589.503,2609.31,205.642,246.408,8558.64,-0.818506788298908,13.8464630477584,27
111.376,248.009,218.43,802.442,65.7916,284.868,4546.04,1169.86,75.8937,279.486,861.845,8.52293702602173,-39.6746351002818,11
181.328,394.786,974.768,813.251,-0.945396,121.311,1891.64,2147.6,251.815,114.112,674.196,-16.1240984015313,-32.2455058698731,21
111.531,499.299,105.619,130.582,41.3827,223.745,3112.45,404.841,655.267,700.621,2286.54,-0.928638675036115,-39.6734254736726,6
202.89,804.757,98.2542,871.014,135.349,144.726,6704.39,273.841,-8.68748,139.396,169.186,14.5128829241707,-38.2356792249454,11
205.52,2723.9,1504.6,985.062,-6.11397,-102.185,-661.845,3222.13,-51.6499,509.333,19508.7,14.2260393607047,22.8278459356279,14
103.926,1355.19,927.398,383.57,-46.2485,18.6153,-124.774,1915.29,917.254,315.655,17816.2,15.0882558316803,27.5435584985114,14
123.409,1177.87,133.45,1262.27,-95.4496,223.289,188.616,1422.79,280.554,368.82,-50.9385,-29.3327826558408,8.17042588133959,28
142.651,322.53,55.4142,1191.74,7.69977,372.254,1220.14,1315.27,249.188,200.203,214.811,-20.8258346167071,-21.8346027142554,28
337.109,901.479,49.2704,1994.3,-91.2353,-129.778,7600.72,370.995,244.503,303.013,19775.9,26.0826689300558,-14.8238908408743,10
349.748,698.914,125.737,336.995,6.92646,1588.71,3646.52,1282.47,682.695,779.442,220.581,2.92669721292728,-39.6678782454839,21
89.0658,2714.72,208.503,734.777,52.3271,241.631,1471.38,589.999,22.1719,111.121,706.704,-3.35261411107819,-0.272054504680149,4
154.804,259.859,79.6529,1035.9,61.0437,84.7862,649.057,190.054,221.619,135.222,8248.6,-4.07437961116453,15.5198438966808,16
155.31,374.516,202.094,585.027,47.8837,152.809,5008.38,1721.93,321.065,489.486,303.42,10.2670142098539,-40.3329948524053,11
183.027,284.557,178.437,1258.54,-59.0798,269.294,3614.93,425.5,152.253,121.523,1368.63,4.2283580412223,-38.6724026555101,21
154.048,1292.76,885.913,88.1832,113.783,-34.8287,-86.528,2733.12,1470.79,1327.74,23204.3,25.8096649729967,23.6450917638796,14
268.896,561.825,569.48,166.095,-37.5165,-29.0158,682.252,2898.29,1014.26,618.106,20419.9,18.2116241701103,20.6663886226641,14
322.231,301.078,175.305,791.823,-16.1424,84.3081,286.167,995.208,523.783,277.823,1412.05,-31.7250936615204,2.49348594124764,28
457.344,506.691,107.222,135.405,37.5518,539.032,2622.75,494.103,1045.67,1136.76,12443.6,14.7796562952724,-10.4727747329109,10
80.3671,290.989,1286.66,550.045,105.843,-121.089,-619.246,2155.19,313.084,219.076,22520.4,26.3505367084549,28.77061607948,14
271.009,311.91,105.377,1810.07,-88.7449,36.4857,3222.35,264.038,417.428,10731.8,2000.24,10.7272407199618,-27.3209295423479,17
342.007,315.892,132.866,633.136,29.2632,113.164,211.317,1069.57,-136.171,265.592,1450.6,-25.1735861809359,3.80606988923081,28
60.6087,496.972,709.016,773.871,-26.9362,108.966,123.445,926.749,258.745,194.28,5735.69,-14.6091586704842,27.5879651123444,28
146.266,2607.69,492.582,609.626,-48.6693,9.69185,-71.7262,2251.66,753.143,321.378,7506.97,-0.386014890201145,14.1948792389474,27
304.672,324.239,127.033,698.109,-23.8603,175.503,462.647,1276.66,36.2921,179.451,509.63,-26.8016039846382,-3.72681253480787,28
238.642,337.217,200.634,4057.2,113.079,632.514,7245.71,812.759,489.262,286.988,143.351,15.6299594742043,-38.7392790120294,24
14.4375,505.303,269.065,2232.28,78.4853,73.8608,773.405,1361.57,275.199,169.796,17032.4,14.1105894173696,23.4668271336715,14
280.95,801.186,143.307,734.368,90.6769,272.509,1036.85,464.012,131.765,82.8697,1244.07,-16.5733748972251,-14.972488836269,18
1262.69,3452.5,-136.65,25911.9,-88.5982,235.328,4891.17,1001.05,832.504,11504.7,967.44,9.26460486890212,-31.4426069071547,24
132.181,668.027,1076.79,-98.0236,66.0895,-109.288,59.7559,1849.98,1107.31,447.48,21934.9,24.3303556294199,24.4127984689901,14
367.878,1289.69,99.6626,9927.02,-436.226,576.049,8559.59,1962.42,-219.454,3770.77,781.766,12.0606936676419,-43.7686198741149,24
565.425,411.943,66.8571,1308.91,27.7857,232.719,5627.8,307.265,264.852,331.027,4382.67,13.4992385669506,-35.7195858042048,11
228.188,857.685,751.53,1402.67,21.0137,-105.955,1236.09,1330.72,343.104,198.384,22687.1,22.5353450811634,10.6788940429884,26
74.9529,273.632,707.581,1297.62,-105.269,106.753,818.749,1019.06,290.191,571.876,14688.9,10.9117051669311,21.7690869304782,20
158.886,621.536,259.575,1643.26,-81.7658,-4.68771,2325.7,539.509,1493.79,17489.5,-234.985,14.6879850901618,-24.0635527393457,5
176.234,688.759,173.637,738.273,48.2821,522.024,1880.22,1528.76,164.38,373.681,457.201,-14.5404295269198,-30.8569178639961,21
130.672,555.74,328.599,3043.65,-128.591,85.6344,46.6836,2348.32,426.772,142.726,11227.1,-0.432833204455464,37.5068468024238,14
247.791,595.886,215.791,4390.65,191.044,-51.5996,2871.25,361.962,192.912,12368.1,473.889,13.8654071457561,-26.7832867692875,17
144.825,253.601,1318.39,215.331,54.405,102.958,-73.6775,2553.37,402.643,913.624,7947.38,-4.79282272539408,32.9856989967338,2
74.6671,487.676,682.925,1524.3,-112.422,-110.645,-485.427,457.504,117.113,409.452,13131.4,0.242560071915898,36.2139795493493,20
198.031,337.103,32.6825,890.87,188.029,204.85,-327.687,1437.52,569.342,135.986,912.691,-43.0598532509049,7.908235094279,28
83.1706,1649.91,541.397,1176.65,33.9354,104.672,360.243,1878.96,119.714,156.823,9467.3,0.305608151996396,22.962714315322,14
165.916,567.663,731.415,-6.89013,54.2244,-31.7163,550.031,1813.51,621.606,968.638,13877.8,5.78421909592613,26.7100560607086,2
300.903,629.288,51.1671,515.83,-48.5432,340.803,2520.03,1139.29,71.8617,740.058,700.445,-7.67123009233266,-37.1507134434813,21
112.8,284.498,160.589,645.848,-36.607,206.796,240.045,1507.91,296.035,3.52418,156.593,-40.6569927056629,0.84292415280761,28
266.084,498.519,540.892,172.892,17.3887,-26.5101,286.298,1964.47,532.097,1052.99,19680.1,21.8683343721974,23.022501627131,14
221.518,3522.54,1264.37,120.252,-40.9545,-61.3562,-56.9623,2075.39,755.886,744.047,17399.8,3.47570726135283,16.972178862386,27
244.485,332.653,147.102,1602.94,-137.95,157.74,744.924,2286.54,900.539,1139.75,-23.314,-30.0627574536489,-12.5966322025161,28
76.4852,1083.85,844.449,149.305,116.123,107.063,402.809,2061.27,969.218,239.901,7417.89,-4.13325123334063,23.5872252764083,2
22.2062,1286.18,394.6,614.094,-81.9193,-321.447,763.165,860.753,384.047,15.4327,29166.8,30.5015467227207,10.1393719007776,1
168.103,1979.15,377.401,555.382,55.5226,-89.6789,202.837,1182.35,31.0153,341.27,11504.1,0.939330982073786,19.628776264068,27
136.903,206.497,283.284,685.389,20.2254,117.353,371.938,1949.78,224.59,239.834,541.614,-39.7200590557957,-5.20638396216937,28
154.64,1354.72,1388.83,55.05,-54.9038,-93.7137,-421.197,2417.82,979.17,2250.7,17490.4,13.7483021902781,29.6521562524284,14
149.621,248.992,99.5879,1101.78,6.9889,81.3471,409.177,423.846,33.5614,318.723,2417.21,-22.7684212284679,5.21122002093942,16
773.482,384.915,90.4302,55.5006,111.457,447.26,321.822,257.686,579.193,852.072,1674.03,-3.62397985851511,-5.21596082494984,25
826.479,427.678,1694.34,59.7407,83.2176,114.369,-327.741,1522.8,2063.44,2237.92,7240.45,1.65890083625828,4.09191613801091,25
148.613,2020.75,466.359,581.577,105.336,-42.8639,-230.894,1610.09,196.656,109.698,11341.4,1.43852431845456,19.6649685505242,14
285.913,317.282,60.0281,653.938,-15.8367,101.087,58.8382,821.183,148.533,250.209,3935.13,-18.0462704057686,20.9478338582409,16
124.515,2180.38,661.987,107.933,15.4595,42.4638,211.212,1465.03,1261.38,741.212,13410.2,0.76905101082944,19.06435390593,27
153.069,339.764,409.446,691.188,-40.2557,89.5768,1183.1,1511.12,77.4731,226.716,335.865,-22.2485956295661,-22.3961368218886,28
302.699,418.1,1074.54,1036.78,-30.3726,-7.7507,1231.72,2444.29,188.53,566.798,14317.2,10.1865042734874,17.6551649991445,2
497.725,318.944,180.12,150.678,-40.9463,509.713,3358.06,110.921,382.322,14153.7,-1163.17,12.8813835953759,-27.4273868997823,17
198.799,340.216,194.849,703.74,59.4348,64.0192,1514.35,520.754,362.122,-35.694,2479.82,-15.577911723626,-26.7612574561116,6
559.114,2341.26,88.7081,26974.5,482.637,-239.01,5466.16,291.743,295.555,704.255,41373,21.039796107521,-15.3908061316779,24
113.3,1313.97,362.46,806.773,39.3957,-25.5485,510.155,692.579,-36.313,30.3118,13142,5.93529306675486,20.9471710240034,14
373.275,826.184,31.4331,848.982,58.6544,54.5741,1894.65,995.694,351.368,18624.7,-490.069,15.6233027785302,-22.3304542106052,5
118.153,225.617,484.757,188.692,93.8179,-108.91,716.53,1573.09,3019.6,305.062,14814.1,8.70905614167332,25.5598329758871,14
207.48,565.84,603.86,334.324,80.7356,-64.1704,685.923,1630.34,443,1147.31,15437.8,9.39775615913659,24.9132884695579,2
209.583,358.334,108.945,1435.77,6.2911,667.56,3759.34,1390.87,152.825,12.4069,560.415,3.8762490682795,-39.565560163428,21
89.8978,390.914,28.9657,1617.56,-104.225,312.793,1767.87,323.94,83.6599,39.0272,172.095,-15.3749459874905,-29.8205769562017,18
134.44,605.643,880.119,783.78,13.2879,-72.9911,582.376,2280.11,129.242,225.53,15996.5,11.5798340202574,26.517382322827,14
111.428,213.344,62.1722,829.761,-10.9888,106.802,3923.69,614.105,138.819,303.574,592.521,5.51087780618955,-39.1504307182905,21
290.566,232.985,240.21,666.999,-8.86874,215.28,2212.32,1972.1,230.364,148.468,960.736,-12.1025297680209,-35.1570515519397,21
252.748,585.161,1149.93,78.1742,-56.0973,-30.984,11355.7,2228.52,1304.35,413.599,16903,18.6546607794737,-40.2040924499225,11
145.102,774.927,503.154,1891.55,-55.3759,-18.6619,-622.761,1223.01,362.826,279.411,12226.1,-0.135057385295667,35.8200702726316,2
234.943,237.158,107.298,606.582,-86.9598,-150.706,-305.105,213.062,485.595,288.401,16712.1,9.59087097533371,32.0645305423352,20
222.646,637.384,1245.22,121.221,56.1836,-40.9601,857.303,2604.61,980.267,638.096,16756.1,12.3869069230242,23.6285850482511,14
143.97,438.912,939.042,899.03,70.3268,60.7872,483.481,1605.95,764.216,46.4826,9262.92,-2.38810570698217,29.8720953857536,14
121.564,321.995,144.502,734.492,-0.473862,82.6755,-20.3239,63.4659,540.809,225.975,3525.64,-21.2492089716158,18.491849164558,16
84.1485,587.798,671.201,1047.84,53.2272,57.0473,344.534,2345.05,119.592,181.955,1218.81,-40.0168208997727,-2.34864469426772,28
84.8442,1087.74,1755.26,556.897,-25.9034,-116.253,36.3476,2295.16,431.279,226.174,16157.1,13.3809415180015,29.4390247719156,14
255.581,196.41,249.402,942.041,102.791,149.745,1113.78,900.059,317.916,193.439,1905.11,-19.5678071170988,-19.8400041598277,28
221.663,302.387,140.502,693.871,-61.6795,223.229,-292.473,2797.94,129.963,215.379,419.746,-40.8477814741468,7.51040134266908,28
111.579,3296.27,1046.27,583.918,-7.01589,-71.9897,-255.496,2589.69,329.75,305.093,18117,6.56348809520108,15.7737318169674,27
165.571,718.428,760.132,347.592,4.59281,119.248,577.299,1544.75,881.414,899.507,12159.2,1.86603152928117,26.2645806732296,2
334.497,275.201,30.8254,2080.95,-123.441,296.309,853.839,508.436,113.883,241.42,1592.04,-17.7414388829006,-14.6443015665995,23
539.56,238.914,-1.62005,849.036,-11.3398,213.007,7132.45,1488.43,4.17366,1206.43,1274.05,15.4158726066963,-37.5969323933343,11
238.303,346.338,13551.5,768.049,51.298,325.014,-67.7069,2708.38,454.08,106.562,1131.17,17.0936412312012,-0.879588387076537,22
533.767,962.784,68.4342,608.268,-11.6289,1258.46,3026.61,1027.73,146.49,206.863,109.553,-1.89411612181593,-37.9858643974539,21
174.539,394.684,528.914,1248.51,129.187,-123.719,231.427,1718.08,6.25692,447.741,22040.6,23.2934033015148,23.9638690266576,14
173.913,261.893,89.0416,585.288,-85.8953,-246.194,5287.17,625.259,41.0698,113.637,33342.1,29.1141364989061,-5.68370693840735,10
265.956,224.031,154.491,3929.96,-436.084,-13.7491,2954.03,607.656,324.335,20907.1,-1737.78,14.818643862464,-22.0119851332935,5
134.403,641.744,1009.29,91.3436,40.1387,21.5091,185.232,1468.1,-147.572,1097.58,2140.97,-29.1719294836453,11.9022646261348,19
255.759,832.704,113.335,203.406,-3.75593,-191.757,-231.087,249.394,1149.02,884.556,15090.8,3.62902951463325,26.2522536747221,20
131.015,240.746,692.655,573.625,-37.9645,624.982,4650.16,1286.45,212.19,64.8825,1637.85,8.77211445217586,-40.5691943994642,11
179.82,788.597,1309.9,607.302,30.0639,-63.9668,-259.49,1983.44,143.255,144.732,18295.3,19.226054702805,31.7978411127834,14
102.625,779.845,990.733,669.144,-14.625,-67.5598,-155.177,2195.86,150.359,99.8225,12945.5,4.44565662750818,34.0090711339781,2
135.118,851.001,172.843,2548.54,-78.6178,-122.285,-418.209,752.24,338.467,154.892,15837.2,9.22868648854362,38.0533945369492,23
271.798,252.167,76.6673,1457.98,-12.9616,185.372,1064.24,971.693,63.1218,241.282,573.386,-21.009249433971,-19.5510702502559,18
197.751,612.219,439.117,728.992,-107.703,73.2375,327.461,1517.95,729.328,262.571,8749.39,-4.98163627564924,28.8602347861539,2
283.075,628.277,1156.49,598.375,-62.4433,-65.5322,793.535,2201.37,221.35,184.37,20669.2,18.7729720254427,17.6034771060514,14
92.3757,780.853,1052.52,-84.8892,24.7785,43.6649,533.9,1471.17,1012.19,809.014,14780.9,7.87926856090437,25.2921867309799,2
215.647,693.911,343.308,35.6197,45.9804,-236.018,669.815,1941.18,729.971,2029.71,27656.5,28.0363784644004,14.3687976053787,1
252.17,6094.22,133.669,319.699,565.943,99.4389,4573.87,330.587,222.882,768.824,13226.7,20.977159266645,0.617154843035463,11
109.948,273.869,94.1791,-1.64512,-19.5056,137.294,268.132,185.346,6468.32,-28.5169,2393.56,-4.38144533838504,4.92490782445805,15
25.7175,1454.51,-7.56648,725.529,92.5513,138.025,590.156,299.41,238.844,266.157,2813.56,-8.44427038157972,12.7043805932428,4
116.792,301.209,59.9987,20.3722,54.4949,456.069,3697.65,713.599,905.681,1962.78,26474.8,24.5827301730183,-2.43282993656649,10
224.445,285.118,207.18,1781.88,260.12,127.045,3325.86,683.942,263.696,304.304,2022.36,1.61993868174953,-36.4411878091557,21
135.831,334.528,172.294,953.383,-64.2919,-135.101,-156.054,1791.83,312.262,205.526,13731.1,4.87220681254748,35.4760521987667,2
18.8402,3127.65,925.76,-11.3004,125.329,-89.1692,776.06,1753.61,1014.7,224.125,16041.2,7.75241183319324,16.5962557661487,27
218.247,1601.83,439.08,389.942,120.329,-65.7656,386.833,2728.78,1058.84,1499.08,18141.3,12.2771357171903,23.8795429975297,14
146.247,440.99,1019.48,71.3458,63.1409,-4.37954,554.82,1565.08,525.825,700.862,13569.5,6.03051027845554,27.7864316062943,2
345.179,494.537,26.6906,2129.25,55.7557,491.75,4926.91,1566.16,323.726,12824.4,-690.044,13.0201391560519,-30.9663003961189,17
147.856,1639.2,423.451,605.779,137.118,23.1273,35.9864,1565.59,345.203,275.918,16858.2,10.5436182884821,24.7629188378988,14
170.561,2255.68,358.255,276.484,14.8411,145.403,6463.33,1731.74,1656.19,2357.43,23855.2,26.8547797220664,-8.72991696864943,10
149.757,220.279,236.188,3924.08,11.0912,224.142,73.7936,1887.33,-229.815,241.558,452.641,-10.3528603076343,-10.2161615315937,23
680.533,362.442,128.512,866.426,35.41,211.93,8639.08,2583.33,-59.4985,315.085,-21.8051,17.8296604799576,-40.1723661452624,11
144.372,3450.02,1046.01,77.6428,95.6278,-14.8336,772.997,3061.05,427.08,973.93,19832.5,9.5186686715029,18.7255273277529,27
1294.74,693.62,84.9529,1373.47,6.92444,863.847,1420.03,509.921,135.901,108.798,2836.24,-0.493577136179016,-11.4870922391974,25
424.595,212.707,138.93,1640.48,32.0661,105.994,1286.58,253.711,90.7637,32.9234,4086.57,-11.5514564475835,-18.9168142102938,25
338.393,1096.03,38.9281,14908,67.3318,-162.076,568.981,320.875,29.2209,30086.6,-80.4452,9.9962153407551,-26.3460299344776,24
266.026,304.839,136.446,806.118,145.024,800.577,3773.45,142.571,366.278,7455.03,-741.232,12.3208533274118,-30.6042831696452,17
455.605,621.437,145.687,689.2,-1.66476,68.2428,533.509,378.542,-40.2379,83.6654,209.322,-12.5159065681017,-5.13324968207226,25
143.428,482.167,260.077,1295.34,-15.3549,75.203,685.628,3018.07,90.8765,327.04,1468.46,-31.2502979248312,-5.43303464688305,28
183.151,280.884,8.8461,923.123,-79.4729,228.252,1168.95,1174.74,187.047,341.863,7141,-5.08306064612924,-2.06978992760882,2
-4.298,2562.69,5.56835,97.3353,23.589,-80.9347,1043.49,308.383,285.504,1747.56,7203.66,1.92523330396387,14.829153853161,4
280.509,290.213,806.519,69.4262,85.0724,-63.3294,-36.5783,2083.72,1371.21,1937.18,15715.8,7.53878050404388,31.4855820069132,13
729.621,512.237,142.065,62.3485,58.1649,309.602,71.2158,132.559,2719.31,184.832,477.781,-9.28671865224179,-2.5009834217967,25
199.087,580.251,65.4692,11869.8,176.479,579.676,3607.09,708.856,65.823,11014.3,-296.561,6.69182035708699,-23.6847836553013,24
24.0149,897.509,778.489,983.298,-156.669,-229.204,660.5,1603.82,611.749,108.974,27375.8,28.0842934534715,14.3411584312405,1
72.4852,2330.29,416.811,75.187,74.2786,-103.858,512.517,1110.12,356.07,850.899,23126.8,21.2421688387316,16.6625717799321,14
150.222,253.108,142.721,219.936,24.1489,245.465,1299.82,383.783,710.223,767.194,19859.9,19.5296965929608,6.81286312445509,20
183.664,916.825,377.064,869.045,-0.829902,-200.725,785.037,1048.52,222.409,243.294,22091.7,22.7905452014978,15.3324214901064,14
232.9,189.519,98.9754,1701.42,-43.3849,107.922,1208.62,74.6883,208.09,142.37,2491.07,-14.5401569165903,-18.7679652264379,18
114.225,335.939,52.1985,160.549,64.0515,1101.02,1507.92,1638.66,969.128,1055.09,458.533,-18.8103711891628,-24.4960782272267,21
119.479,863.915,338.935,1480.3,41.3325,446.805,3928.57,1366.28,310.052,25.2143,-30.4397,4.34065805419173,-39.9273648516823,21
197.495,262.226,98.6685,610.024,-23.1882,628.881,4300.08,705.267,131.371,204.036,520.64,7.26249885400333,-39.2928353444778,21
206.618,3046.69,1036.65,25.4881,59.7798,300.77,518.232,2461.11,1345.56,864.6,20784.6,10.2754331043957,18.7063180729962,14
107.333,334.154,-13.0884,1878.47,-63.5342,561.206,1927.66,787.405,135.507,327.977,387.805,-14.3743941845446,-32.7512372495491,18
274.628,5251.9,268.15,777.761,-52.948,-215.847,668.24,2699.17,274.121,555.191,30960.2,20.4180712290906,13.8917356648328,27
174.364,221.729,-6.98501,583.591,88.3876,144.966,988.578,2851.15,13.8995,296.405,720.853,-26.2861641289757,-14.0113324817503,28
131.759,2311.85,50.5015,613.413,-2.55207,-221.724,2430.43,400.232,42.0314,293.987,27867.3,26.9407655823431,-0.363171884850631,26
317.394,2340.92,16.2389,222.89,37.5133,-154.597,2373.39,311.684,221.603,831.634,18761.9,22.2955695189934,2.16117371752192,26
304.375,1185.6,6.35759,695.016,-8.55559,-27.8914,387.248,175.647,517.948,127.643,7791.23,-5.76851790005427,17.5463559411628,20
83.096,849.439,100.409,2658.86,-47.3568,77.6545,-271.871,434.185,-95.264,175.071,3013,-35.8895651923246,13.2480005982596,16
55.1744,377.33,77.9098,76.27,-7.86604,289.768,3438.33,209.057,101.515,1204.32,149.998,2.69264779077929,-39.0444009288415,11
293.129,496.121,729.323,668.996,-55.1053,-105.57,-368.51,2144.26,468.648,70.4862,17297.1,14.7274800062701,34.5258152043825,14
477.163,426.517,169.808,15674.8,-53.4317,-160.347,1423.71,801.649,1457.07,21683,346.25,8.51216421029988,-23.1981133618456,24
98.501,4292.2,142.09,697.953,119.164,684.561,325.186,107.249,203.051,377.793,2626.92,-1.5982632957847,17.2395781458315,4
132.717,265.172,8.88404,4488.19,-68.1889,189.667,-348.001,57.0357,274.199,396.158,1163.92,-4.54743757157827,-16.4861242971808,23
109.584,2516.21,743.64,2298.17,157.814,-76.9225,1323.14,1693.61,1136.2,1458.74,17391.2,11.4950743471489,17.9436463305443,14
163.691,695.44,607.986,221.561,-72.2532,-57.1482,720.599,2281.14,884.584,206.831,19818.8,17.2385014707709,20.173827435685,14
212.101,2488.97,19.4918,634.508,5.74092,171.343,902.11,186.897,324.784,84.3379,735.214,-3.91208374631031,10.7648535839781,4
191.587,310.98,347.776,646.763,-38.1913,303,986.503,938.223,304.554,128.955,219.628,-22.0935132383292,-18.2524668974253,18
246.68,294.559,54.7068,-12.1933,8.94436,234.524,2754.57,758.177,921.992,1617.24,463.359,-4.07137718778653,-37.9374768867817,21
448.669,1605.57,27.6104,414.284,-39.2087,42.6936,727.959,330.363,59.5257,11828.1,-799.726,10.5920981116216,-16.3957061299869,17
127.61,998.955,894.263,708.713,-46.1675,-175.01,-67.2094,2032.29,417.509,98.1583,13075.3,4.16060202943111,31.214664628707,2
39.8427,276.938,274.158,1601.41,172.958,-145.804,110.498,1099.03,319.135,337.985,11282.5,-1.64314961144886,32.6928499726979,14
759.916,625.452,398.24,233.874,-41.2692,346.406,8946.27,1199.87,1378.35,922.847,2107.5,16.9712345551039,-38.9728283334222,11
248.687,311.107,84.2691,871.922,23.8669,150.136,258.445,1565.01,-269.297,393.179,924.252,-31.8539968907477,0.592264368857771,28
115.969,252.002,154.748,886.13,60.6365,81.6732,358.986,1195.67,215.585,196.07,2570.35,-33.523807899757,2.71274755320997,28
295.52,408.113,220.786,1333.64,50.1225,212.61,168.754,753.453,524.786,98.0375,1589,-26.8511398515601,4.92741486249772,16
174.564,898.938,74.6194,90.8728,30.6289,-30.9923,783.044,254.734,539.723,795.936,14188,8.5761640145969,14.4751540074746,20
64.6929,225.383,55.7166,870.755,9.60389,653.539,2185.59,611.785,202.247,218.666,-264.404,-10.9556884429242,-34.4988291744336,18
600.466,431.178,103.575,1429.53,45.9574,143.82,996.048,1033.36,311.481,400.72,174.041,-12.7514924330961,-13.3523673902464,25
196.049,337.838,74.8119,820.923,68.8821,612.668,777.602,381.429,95.1081,172.566,9993.64,3.41897442818056,13.824989990383,16
161.721,249.615,1087.24,735.52,-24.1537,28.83,364.406,2246.86,567.464,93.5931,8001.62,-5.25314072974917,32.0287373492339,2
298.735,400.661,244.807,15671.4,661.251,-571.56,8177.03,338.016,648.617,49217.3,-3694.3,18.4831548375184,-20.194509267362,3
2399.34,241.071,28.7036,-25.9793,-34.5104,-167.114,3480.67,351.104,2364.14,2100.42,35908.6,31.2813519796305,-2.01211430293027,10
265.932,849.91,725.471,1015.13,-81.0157,-85.3897,1025.2,1611.04,269.438,421.344,17075.8,14.5972212191622,16.6343679560552,2
135.813,2006.84,602.951,170.656,58.2207,-214.067,-527.439,1688.41,1059.03,2215.73,30660.6,35.6040638291989,16.5972858334591,1
447.914,1077.35,731.138,280.143,7.26538,1064.97,3261.12,1997.61,1273.66,1055.73,4606.22,-0.57567711397869,-38.5218209839379,21
134.285,659.025,1388.62,706.221,-57.7089,-90.9614,-289.984,2086.33,252.038,214.685,19961.7,22.1321171734313,30.4290191091891,14
147.127,1065.78,571.454,560.962,-16.0153,-49.4249,2756.97,1536.06,-34.4135,178.612,15687.5,20.344193238411,2.25561753483179,20
36.2412,670.581,92.7794,596.677,-77.5023,463.003,564.306,180.388,90.1412,139.935,2286.46,-15.5392248663302,9.03436576425564,18
97.4177,4238.07,1641.29,-40.8004,168.625,102.329,1166.99,2622.53,2916.86,1604.54,23217.3,7.9233358721312,18.4138768473801,27
175.921,199.289,219.49,601.064,36.8535,362.854,911.308,1055.7,280.72,150.169,1111.12,-23.7740886611757,-16.6471034358716,28
345.945,394.167,136.27,71.7186,60.7399,52.4564,128.644,919.243,1030.46,214.458,4816.05,-14.5116062502512,20.507715793204,19
99.2353,233.105,81.0559,1058.59,99.7646,628.707,6832.82,593.203,219.411,102.044,2070.44,14.9353084460688,-38.1025680775874,11
204.261,5640.52,-74.9152,300.866,401.67,-220.128,491.195,180.066,598.182,838.685,30973.5,13.7974072987811,11.5597588563257,27
567.653,3212.17,50.6686,716.998,125.551,187.008,1350.83,-214.163,377.408,262.908,1726.84,-2.26328292427887,7.02732145151485,4
181.274,310.146,337.552,947.411,-12.9856,95.6996,-359.351,1996.9,355.23,195.977,3215.63,-28.2094114302182,20.9425734872303,28
67.7874,857.771,806.565,428.549,56.2698,-237.84,852.851,2031.29,1971.45,3885.08,20433.2,15.8554782038941,17.3801583298305,13
628.217,481.038,120.888,633.158,-126.097,-52.3052,4894.38,535.382,471.923,103.601,30952.4,29.6237075235187,-5.5099756769681,10
162.223,854.42,1205.88,137.55,-57.9167,-351.026,-157.979,2144.21,738.22,959.029,34765.1,37.3396307357627,10.6899303809539,1
367.933,1934.91,628.42,418.768,92.4657,-33.2637,895.186,2683.45,1579.98,2606.26,17003.1,7.55453490223432,22.6373828002181,14
65.1357,8741.8,834.398,451.343,264.028,43.3703,948.472,2289.02,4561.84,7676.01,19880,0.11828691534217,19.136486150642,27
681.909,458.757,63.5105,1000.39,17.2575,1019.56,6337.59,828.474,207.607,2203.61,743.927,13.0415525427236,-36.5668990145058,11
122.002,1057.01,347.126,732.079,-28.2223,-130.059,300.593,1443.15,71.5249,161.469,17882.6,16.4520245721569,26.3182769288757,14
218.789,405.633,680.341,161.216,96.7317,210.234,1322.04,2820.27,485.893,1039.53,3406.13,-18.968190062289,-15.1106130615927,21
209.572,130.641,17.244,649.367,74.6529,213.561,-125.068,2130.62,198.344,222.5,393.574,-42.1887390764767,3.30708403938739,28
142.288,175.674,136.21,1104.39,22.0813,146.097,3181.94,443.959,316.926,388.337,2149.97,-0.01418368336937,-38.4472291691353,21
152.699,288.912,433.878,610.683,-3.6316,200.692,558.457,799.462,333.52,264.419,614.45,-26.2537834753357,-3.92284402636741,28
168.71,4003.43,682.719,1204.13,78.6647,25.1716,-390.02,1547.43,589.37,193.446,17710.8,3.37336402517359,15.6631441913441,27
94.7198,768.821,938.145,263.577,-24.4715,61.1328,2253.96,1895.24,12270.6,234.14,3992.66,-0.609628021114743,3.42298132496794,15
295.662,534.086,5.95579,2737.46,-83.6106,299.025,4341.71,664.919,270.321,229.326,2434.08,8.59050155482827,-36.1945619351359,24
137.434,769.786,986.414,360.618,14.7471,-125.013,777.049,2276.98,1814.07,3898.6,20182.7,17.3139745148734,19.5957782637566,13
43.5559,173.979,143987,807.612,-223.609,-86.2994,2485.79,2379.69,121.433,189.296,26452.5,36.9939847690615,-26.3030021165889,22
166.792,2095.04,1155.48,-62.8516,66.2894,-91.8445,20.8008,2192.95,387.7,928.269,21747.4,20.6370517069645,20.0683244882302,14
64.8417,309.968,132.755,563.896,96.4843,898.069,2220.89,873.245,507.822,1483.07,172.216,-9.63081720311074,-33.7490257166348,21
126.91,552.506,851.049,950.068,10.8066,-38.3544,-146.704,1800.61,216.678,356.277,17746.2,16.9848344934684,33.1724239252024,14
276.393,3007.5,82.8813,830.308,23.2896,-1.49054,4679.6,231.009,199.725,226.823,5567.65,7.43413201906345,-38.4901754913535,11
382.319,161.865,1.63906,1106.71,82.4146,47.3911,2110.47,563.272,-12.9453,-22.6472,6625.08,-4.51937255162923,-27.6359866266266,6
78.7403,894.009,1236.54,589.426,-5.23368,-120.659,220.708,2515.19,605.136,88.6946,18260.8,17.4603719913076,26.6230984367169,14
195.343,398.746,82.133,2098.06,118.008,82.3512,3637.55,342.191,221.428,-42.1619,366.028,4.50771252411099,-36.8746918486125,21
117.11,802.181,523.708,920.305,-106.436,-188.202,-163.977,2549.66,452.295,15.6467,30018.1,33.9423364148082,15.113243948624,1
128.484,169.09,67.5444,841.589,134.545,1346.45,999.014,729.326,150.433,376.574,345.038,-21.0977442989467,-16.5464315351479,28
196.794,556.61,777.546,1526.09,98.3735,32.0485,2984.42,2066.86,242.466,122.235,8719.8,8.66697265940912,-21.3510597870791,21
214.11,728.071,107.354,813.1,142.143,89.7333,1338,388.284,171.592,249.109,2069.99,-15.4159782046485,-21.9063728623396,18
168.471,296.7,31.9764,517.477,-66.374,388.644,992.303,247.515,244.9,22391.3,-1176.71,15.5444401913611,-21.7573238997414,5
175.631,941.33,876.23,127.446,149.136,-87.4743,40.3661,2345.69,968.38,320.181,23443,27.3389018579705,22.7310868761003,14
63.0445,276.071,130.022,561.488,-39.1467,-21.9683,5681.75,75.6591,500.815,380.642,27463,27.0470949549283,-6.69818534083846,10
149.126,247.595,102.254,583.298,13.2604,207.214,3560.4,539.001,124.53,211.755,14947.5,23.8352502264651,-5.17079902198922,10
465.984,4899.95,768.953,984.191,-0.360652,-61.9199,183.623,2164.29,209.467,658.56,20147.9,2.11463839393574,17.5475952372169,27
176.309,182.606,162.824,133.873,72.0332,21.172,585.569,739.408,1572.62,198.59,10321.6,-1.52607742508626,22.4369700281121,2
175.464,207.371,-11.0043,1038.96,44.3339,234.357,916.969,2001.01,6.00391,342.428,131.637,-25.5693092210218,-18.1993666399471,28
322.377,301.467,151.421,132.172,119.388,81.8422,2602.4,1386.6,570.255,1301.13,1082.02,-6.41781718507328,-36.4592262636584,21
164.556,536.711,178.713,562.732,-25.3975,312.22,3369.68,651.119,252.85,319.308,5184.18,1.78531711388698,-39.6835669384236,10
52.1069,484.782,218.09,1810.51,127.996,-36.6215,-319.438,2055.76,429.443,168.684,16580.1,13.2955498978429,35.3263470562933,14
65.9766,226.56,92.8363,650.807,-20.3609,117.817,5253.59,982.816,-104.22,302.816,2565.39,12.3685833624416,-38.2518446265427,11
637.237,140.985,89.7859,140.625,42.0787,299.681,-239.631,150.471,2524.2,2985.39,2818.87,-4.90037460360327,-4.30564981676802,17
184.184,483.955,71.2891,67.3162,19.7562,799.674,3854.19,411.414,1158.97,2421.48,7114.78,7.63575192313132,-34.2791689984636,10
501.109,391.772,50.385,19482.4,159.533,0.0751825,1723.74,338.173,248.848,16094.8,-1393.92,5.98508830953492,-24.2153761801591,24
1198.32,1705.41,147.136,1003.39,-29.2559,-190.03,6112.59,883.177,158.087,443.364,20728.9,28.6236343048792,-8.87330930688767,10
347.408,511.444,-6.43597,16206.7,-135.449,822.812,1842.41,397.844,130.102,9442.83,280.031,4.99860824352801,-23.8298222956815,24
321.425,725.258,148.177,227.765,34.7936,506.483,757.904,389.698,3250.01,5470.07,15341.6,8.26856341240884,0.187225116051912,13
161.795,580.544,548.661,1217.8,-69.7962,-35.5261,-57.0448,1541.23,55.0737,399.9,17302.1,15.5080633739219,32.8846195412615,14
272.65,871.158,1020.05,63.3205,39.5013,39.4239,44.514,1589.99,976.844,488.527,13862.7,4.33634223063068,27.7260166413669,2
59.0185,217.232,50.1169,788.428,81.3968,255.43,1066.59,1298.8,315.45,38.7029,474.945,-23.6944214899945,-18.601380646208,28
138.145,367.424,55.7867,2197.16,-23.591,0.0538179,520.856,173.894,256.791,56.6237,3430.1,-27.297833600647,3.81980288920713,23
99.7715,177.807,30.9054,727.275,132.046,1106.51,1568.87,1161.16,160.624,115.77,194.253,-17.6414922232816,-25.7708376687709,28
139.886,615.723,99.2845,34.5016,9.27913,-242.345,2423.25,217.777,527.113,923.694,13443,17.8282255330351,-3.06115507005052,20
199.266,564.502,520.46,60.7784,194.748,25.9925,294.635,1189.66,1073.03,1039.56,16938.9,12.2684089538758,24.3259780988862,14
90.2902,1619.18,672.599,144.865,-44.5002,-104.821,-316.019,1903.77,387.345,723.464,17262.1,11.8911613732299,26.5903991244597,14
160.239,2255.27,898.989,-8.88817,11.6055,-105.15,390.435,2107.11,972.204,347.986,15730.3,7.41850329418837,17.3663018283008,27
172.016,577.144,45.5776,1043.41,47.4851,190.336,3929.22,725.836,51.9368,231.422,4260.5,6.23304296746827,-38.0509466980633,21
292.772,649.534,71.8766,719.237,95.749,104.596,12536.8,737.927,303.917,92.2938,5748.59,18.9196186402551,-38.6202918284706,11
155.689,405.877,117.323,91.7833,31.2045,152.644,1121.83,3984.03,903.393,-111.04,423.162,-31.5607208681531,-11.1828949387141,21
303.956,297.258,196.673,694.633,-27.3762,342.838,2170.59,1406.76,203.366,222.11,3982.95,-5.06286532689463,-30.2425813509132,21
186.473,227.766,135.087,1912.02,150.054,-72.0864,1895.39,479.169,109.243,188.662,26813.4,25.7008905406278,4.73172690680958,26
77.8596,778.001,1053.84,648.827,-32.6784,93.5694,289.91,1345.71,205.728,127.13,14889.4,10.1359149182785,29.0265735483325,14
219.323,446.772,72.7454,1130.72,62.6173,455.487,1292.44,900.739,-197.225,264.324,432.588,-18.07012662427,-21.966843394306,28
194.789,1338.32,100.322,966.18,0.920557,496.867,-41.4319,422.597,92.5529,192.891,2250.74,-15.1043853916364,16.7939165477085,16
463.822,426.776,134.621,1085.31,-90.2324,-175.625,7683.24,394.228,151.057,233.304,32857.6,28.5534335470509,-8.47034875639563,10
156.783,2089.97,175.879,1306.5,7.97406,187.808,706.306,222.52,86.1343,184.512,524.874,-7.55581570175057,10.1560209330695,4
87.3607,300.138,35.7547,85.3901,-31.4186,773.411,5640.95,1048.48,498.783,839.831,22534.9,25.9288265413906,-6.48968005855258,10
159.306,4181.09,233.155,626.852,77.9978,-52.8407,10818,139.958,193.745,327.268,23491.7,17.8269937384713,-37.1673778593922,11
283.734,3386.85,123.351,-16.5208,284.178,161.14,3338.49,293.443,681.714,1011.33,17921.2,22.815683908712,0.686364001047308,10
220.735,559.372,72.9979,169.069,29.4991,595.191,6224.72,951.032,426.321,777.968,1319,14.0765776249253,-37.7891266353468,11
206.246,1526.41,79.1469,160.101,45.2774,257.835,2014.5,465.329,1118.92,1487.83,4938.48,-8.0295063287145,-28.1045212378019,6
171.897,366.384,286.606,573.426,-9.12397,100.133,495.935,1508.8,622.525,33.4133,3583.34,-30.2653167328203,3.82395080132388,28
86.4445,323.461,476.376,91.9704,111.082,-95.5302,798.569,1706.46,1032.46,2675.11,19085.8,16.1907297293027,18.0210553535392,13
168.494,546.804,774.699,606.526,12.4768,59.0798,245.048,2477.5,322.276,312.695,18000.7,16.7042635452972,27.6551552799729,14
409.636,230.185,47.0851,4953.01,-140.71,446.779,739.192,254.34,514.957,3842.32,-544.47,5.33866375890399,-18.7680467732979,24
1372.88,3632.84,352.211,197.586,-23.5722,80.4141,86.5726,249.164,4734.31,195.679,7392.49,-5.45069206405022,11.4425890921268,4
229.965,705.496,828.045,312.506,23.8893,-77.0933,52.9085,3041.53,1234.26,3453.68,13510.7,2.21768412033713,31.4425905701849,13
110.246,330.514,25.2267,833.734,-27.7104,459.476,659.635,543.486,533.283,401.98,3828.34,-19.6196501468339,3.50096148765113,16
286.563,645.686,1828.53,109.1,3.86276,-110.106,469.267,3241.57,-28.9293,705.557,23558.4,23.1705357354129,18.4716580429756,14
176.157,4696.12,75.6992,2399.83,-31.3131,417.813,1086.82,161.964,112.889,290.392,2516.84,-4.91162417065885,15.2517354162708,4
429.191,3558.78,144.091,660.126,208.728,-101.876,-211.371,362.944,-215.105,303.577,15913.9,1.15618573655431,17.0042239575081,27
101.303,404.51,518.097,174.582,-42.8237,-231.153,396.183,2083.7,919.592,220.594,21411.9,20.8755593918212,21.2760816096539,14
113.012,1359.98,1031.92,812.494,-65.582,-176.031,242.895,2295.51,860.94,344.771,19159.8,18.1498952795186,24.9634524202111,14
191.582,300.108,8.24261,721.108,86.0838,175.844,4623.55,599.81,199.803,123.958,750.582,9.33204818643372,-38.3864045587403,11
635.679,586.25,230.526,607.608,-92.7682,225.797,2017.99,1034.46,307.584,48.5949,990.726,-11.8961107091921,-30.8920293489082,25
155.248,774.682,175.694,921.514,145.947,172.63,1651.13,1602.05,-22.0112,135.903,557.391,-16.0331885914957,-27.2942707159831,21
435.129,436.978,130.17,268.336,63.9215,349.348,2621.74,75.6418,361.008,1265.09,580.685,-3.21822833361155,-35.0334053029932,9
155.667,297.158,315.314,985.882,72.9582,162.066,276.948,1315.05,379.544,154.576,616.64,-39.460578320729,-1.02447530586594,28
129.219,2604.04,600.475,869.708,1.85968,-26.8725,285.469,1292.14,432.368,125.231,11752,0.130867578563288,17.4586201423823,27
268.764,341.098,101.192,1405.04,-110.391,1029.45,4157.44,606.51,220.297,240.951,865.238,6.98875401986919,-38.2107621590438,21
139.609,155.878,119.532,89.6528,10.3092,97.0394,3085.11,304.929,485.728,1298.43,2259.47,0.383889716399257,-38.1614464301377,6
107.161,1118.55,961.799,828.524,-71.9195,-160.677,649.534,1818.75,268.855,292.474,16423,12.1925819487087,24.5418861315664,14
16.4343,374.965,89.1424,170.936,183.249,176.59,189.762,1858.03,1941.06,5163.68,653.599,5.90088638594112,-11.6469404973849,17
265.235,401.66,766.798,179.377,-56.3368,77.5891,14.6026,1610.76,1902.59,2101.42,19405.8,16.7330739548778,27.9879091818749,13
252.65,365.604,113.887,950.68,-51.1529,207.656,754.535,1325.82,146.506,345.536,796.839,-24.2690443159387,-13.0022987617013,28
258.499,150.362,169.994,1529.61,-79.497,121.04,470.379,739.741,62.2237,162.884,715.015,-24.6620033675042,-3.74171635398091,28
180.505,410.923,585.094,550.549,46.0188,-8.2044,712.662,2425.42,218.813,409.994,4668.45,-18.9733760853988,10.7463567160781,2
120.472,224.441,58.2482,1032.9,39.2432,879.35,1986.56,411.304,137.662,251.281,6889.17,-4.23155055723298,-25.8890890938657,6
157.713,1052.44,41.1104,10882.5,-7.94135,271.275,4576.8,1021.51,599.84,9392.81,-938.455,10.3511152050929,-28.9061768660338,24
67.0231,275.663,576.601,559.041,59.7782,-100.104,750.858,1300.41,14.7859,248.844,13893.3,9.35160739405159,24.2783328603968,14
39.3797,457.331,91.5145,59.5406,41.521,113.975,859.743,254.921,933.624,511.126,15740.9,13.9142319317547,13.1148630156736,20
222.959,407.967,452.289,424.383,7.12941,-107.414,1599.67,1457.73,1236.83,778.655,21999.5,20.7624236092122,8.72466975849288,14
59.3144,172.848,1.84364,874.95,-50.9454,288.183,3960.53,798.622,280.167,246.527,11318.8,23.7760258232649,-7.35103533728777,10
133.912,473.623,82.1301,590.009,31.5578,88.7522,930.685,382.676,116.885,362.251,1009.36,-18.0022706937945,-11.5917194115123,18
198.25,172.723,198.696,133.86,142.623,839.453,2537.32,837.509,783.045,796.427,5600.47,-6.55937616349767,-38.1123779639858,6
103.876,178.878,-15.8077,555.422,40.2653,114.537,2388.92,615.568,74.9027,229.36,6688.35,-4.18104503064302,-32.138955345193,6
201.68,337.711,83.7985,667.413,-19.2735,-20.6673,3842.92,376.984,18.566,204.007,2022.41,5.30180370496616,-38.6055697463728,21
105.35,184.226,70.5768,1143.45,62.9497,264.502,2857.39,487.727,48.1482,151.595,4949.3,-2.61354233531672,-37.1676173007238,21
168.411,714.244,50.9938,64.8594,-1.50172,-125.02,1668.38,113.646,873.711,922.314,36820.5,32.990141899751,2.39027730440553,26
225.328,418.78,9.68939,26733.9,-1762,177.1,2741.99,766.329,1009.58,15728.1,-1040.43,6.23488623062718,-31.7886191118159,24
242.767,361.295,119.455,852.882,-16.376,612.838,-112.866,258.359,64.1587,308.19,371.504,-23.1220077398889,10.9334938586815,16
1622.85,1462.39,-29.7539,1474.92,86.4788,366.225,69.1644,238.992,245.469,191.973,4595.75,0.333471187852273,-4.42517893331777,25
48.1537,1326.08,729.135,1578.95,-28.9783,29.7875,312.877,2651.42,237.622,115.622,7469.09,-2.05847048451386,27.0676435383962,2
296.085,274.24,64.0241,658.11,-25.919,115.895,198.615,211.74,82.4131,34.19,1463.34,-21.2116379808793,7.10992638225127,16
146.197,1597.03,809.232,92.7242,133.779,-99.6918,537.398,2260.36,835.739,1133.14,18399.5,13.6065440401634,22.4883199666783,14
321.845,511.748,190.678,1102.86,30.8267,164.914,1624.67,231.35,299.251,26.2487,868.793,-14.8833941961358,-25.8666039563179,18
107.558,505.802,195.681,1375.43,-12.5768,157.557,1344.35,2076.57,-89.7426,208.846,570.114,-20.6476427537789,-23.6630479277838,28
176.623,468.016,717.289,111.863,24.5284,-90.5223,162.246,2273.34,712.565,1724.84,13103.2,1.84938529117924,32.0093174923823,2
242.09,262.727,76.3362,1752.32,-132.779,240.716,594.386,1393.64,79.0089,319.901,1301.32,-26.5639544775661,-9.05091988063504,28
465.754,418.623,133.384,777.957,-50.4586,680.041,4077.55,984.726,125.044,446.871,1512.7,6.33110190471041,-38.932129008843,21
55.2699,374.277,393.512,839.376,-44.4971,220.28,-370.223,1803.97,346.278,33.6611,1948.97,-36.5761845661148,17.0106464581529,28
231.844,257,224.043,1386.83,53.1036,69.7001,26.5,2319,649.326,122.017,1787.35,-36.3214695675808,3.62684543809463,28
143.991,280.892,-16.8125,1072.81,22.0317,48.7728,474.542,531.34,289.804,539.584,10783.6,-2.26489180094542,24.7560645131898,16
125.47,840.106,557.054,388.053,11.9017,-220.173,484.74,1512.41,964.991,543.372,20259.2,19.7609886624566,22.6785377520882,14
102.448,1011.91,-63.6466,194.406,-24.834,-236.785,2708.61,544.36,897.278,915.944,32427.2,28.5189293617493,0.444598713304846,26
239.666,889.513,444.737,159.631,-5.72325,1395.3,2671.58,1982.14,1077.27,213.977,636.771,-8.04369238545138,-39.8980120116583,21
103.033,843.684,1235.05,-15.1293,134.323,-48.4732,406.735,2243.78,975.35,2556.29,16963.3,12.8071805466667,26.9867428644022,13
19.0315,514.365,1000.43,49.9961,-5.551,-40.3809,282.486,1731.16,456.986,792.48,15332.5,9.89080327380353,30.5541135752955,2
140.974,1959.64,118.918,29475.2,341.579,886.938,-887.544,1176.03,270.442,8435.82,-369.942,11.0181063129571,-25.5195327003141,24
234.466,753.861,87.1628,27.8623,39.7908,-17.5926,1312.49,189.428,953.333,859.629,6988.34,-1.03604661892356,-3.73663216960329,19
177.994,742.294,71.3316,2086.3,96.5563,420.57,2576.33,1268.85,209.202,346.081,-188.25,-8.20465481602381,-35.8461425516619,21
90.1169,303.829,349.036,875.279,-51.3239,227.489,3562.32,2197.02,121.866,370.542,161.279,5.00776235212827,-43.456595478085,21
324.03,306.961,14.7112,4039.08,113.929,96.5712,471.131,579.722,10.812,102.788,590.961,-6.60029310899247,-16.4902232103772,23
522.887,255.507,90.1244,849.574,-101.473,-48.0978,2803.51,376.418,395.112,269.751,16858.5,21.367600574563,-1.74041590229549,10
119.47,949.021,1217.4,3834.88,115.726,-31.3882,247.438,3024.24,552.818,337.41,14896,9.09231652082876,36.0530017759289,14
374.482,414.321,329.705,129.903,31.5885,317.03,7050.03,1296.33,219.28,985.738,340.31,15.1490279655585,-39.1135799606108,11
-6.3293,510.861,71.7365,871.107,-13.9467,261.768,565.621,172.08,281.292,4560.05,2454.93,4.60507931537385,-15.3413987305648,17
185.34,244.543,155.556,664.047,44.8766,424.862,963.388,1966.1,-244.45,314.218,-85.2495,-25.6055603196688,-18.7323152102226,28
169.246,373.592,32.6279,597.605,32.1385,1317.51,2458.78,682.04,171.096,284.92,-178.843,-8.07790215040984,-36.0246964513062,21
72.1223,1181.56,264.114,61.1216,55.6128,120.349,264.83,1546.21,326.589,752.767,1364.36,-17.4128066601993,12.2323227227282,19
219.254,289.669,98.3393,651.711,27.2584,240.753,1024.58,398.46,279.643,92.4531,1065.77,-17.8420314332472,-15.0659366122696,18
311.158,611.255,1392.99,805.11,99.2356,-108.017,836.141,2024.7,128.696,228.071,13507.1,9.7661806879505,23.3686186927574,2
67.8556,2035.71,670.299,144.728,110.823,-82.6112,180.486,2092.65,626.956,743.234,23351.7,24.4865951072014,18.4831884902346,14
100.835,363.776,528.216,42.5954,25.0181,21.3368,284.988,2203.43,959.976,513.581,18929.9,19.6341724296448,23.0549639316626,14
1106.65,441.938,157.048,4372.48,-53.772,326.807,3329.79,586.597,49.9545,6587.4,398.106,10.5011448852319,-29.3402610256323,23
241.662,264.093,129.365,819.802,151.968,104.082,249.232,1649.44,320.188,193.839,931.907,-39.256130241854,-2.96101600676819,28
728.203,368.661,183.334,2034.91,-234.63,220.297,533.242,1406.19,241.166,17.7663,1150.75,-9.2796289063188,-8.34822591069847,25
242.085,309.45,30.5651,431.197,-13.4604,2186.47,5005.35,1022.09,452.966,914.925,639.722,10.6491506859623,-38.9246308936442,11
186.085,427.499,307.567,820.615,60.2636,86.7508,-396.992,1297.53,176.307,322.682,1189.59,-39.8527183821178,13.6761026658286,28
167.981,312.193,49.5665,255.202,58.5089,885.159,4067.74,1830.96,200.087,1364.36,1865.61,5.82839342467919,-40.4888088275316,21
156.435,795.639,892.75,212.098,-48.1791,-159.464,39.1966,2106.1,956.916,182.528,25575,28.5883917337391,19.2098492028163,1
62.7108,195.462,38.8162,569.409,46.9937,1562.37,271.609,887.978,466.456,251.18,641.989,-30.7365820012028,4.24729848383421,28
117.011,142.831,390.606,246.098,-26.714,4.38267,554.818,1800.35,5616.93,286.79,190.929,-6.746494340365,4.82901064267346,15
133.329,1181.13,455.911,1501.75,61.3176,100.997,-287.89,1492.9,259.535,210.402,13460.5,4.68231008031591,31.6298490065089,14
228.438,361.23,79.4023,216.556,11.9592,-159.311,3623.51,346.053,1125.32,1419.38,31647.7,27.4714392021524,-1.81130446529579,10
198.83,256.131,447.493,911.803,75.7684,149.648,446.899,2552.92,204.482,478.004,1479.43,-33.6417313085321,-2.50604253775571,28
69.9888,225.906,182.103,2722.61,-0.282836,473.598,1837.86,439.669,2506.34,29721.2,-2036.47,17.4657397413947,-23.1139645442495,5
169.985,1602.5,192.959,554.457,104.432,85.8453,1264.23,1487.45,225.793,286.298,3358.14,-15.1006701291207,-12.1149220821029,28
131.446,573.048,921.102,513.254,-13.5064,52.6056,-180.355,3565.47,631.53,873.085,15748,10.8504122570311,34.2889904447834,14
148.079,1092.72,938.11,136.886,135.172,-49.2574,6.36503,2614.65,457.445,713.512,20969.3,26.1316214144761,25.6187466908892,14
120.087,1739.58,869.951,1122.17,-36.0446,139.14,-155.324,2273.85,137.42,129.858,10431.4,1.73633732755675,25.0662706136963,2
123.21,1385.79,-43.6286,1092.5,38.471,379.086,869.513,145.629,241.984,220.583,12696.1,7.21198529609954,14.6600774742814,20
176.104,387.945,116.532,1024.89,-53.1078,140.651,1762.28,0.297163,112.107,88.4902,1940.93,-12.3353892645158,-28.4998243856068,18
116.979,960.236,41.2067,773.556,64.8207,173.884,70.9343,139.987,345.799,247.956,1692.4,-19.077975707146,15.7853347505417,16
343.779,430.716,118.642,2565.09,160.189,-52.608,10552.5,489.947,467.257,47.9362,15631.5,17.203734720145,-40.3454482718133,11
154.996,229.836,1390.95,655.03,96.5925,157.81,986.944,1887.08,-282.766,171.089,3148.52,-20.0476432448401,-12.534263350734,28
317.601,564.055,781.693,535.136,102.319,-123.536,-342.467,1771.97,-42.8891,719.315,20134.1,22.9501488772407,31.0331054183589,14
174.907,326.207,108.314,859.275,-71.4669,628.529,1521.93,266.591,245.073,231.535,1086.77,-15.5786222519364,-25.5968675149923,18
512.899,1639.33,80.5902,674.599,73.6587,189.345,3301.25,319.355,127.45,209.33,333.867,0.797131242016166,-36.7002744755298,11
285.056,270.877,116.764,631.048,61.117,336.577,434.072,168.226,32.5651,260.948,1707.02,-17.9049943511807,2.65268639038468,16
156.783,219.262,69.776,1041.15,31.844,649.819,2467.2,1175.3,-58.1781,223.244,691.788,-8.94960969408894,-36.0478761389779,21
392.086,1245.51,195.723,19100.6,-385.492,-289.884,10899.9,210.81,-43.786,225.624,34932.6,27.4469352432701,-18.0444936420589,24
188.514,297.839,61.7218,1458.72,-106.815,641.999,8031.58,1034.27,187.426,200.514,556.967,16.411016876857,-38.8053653370761,11
264.367,4509.11,99.9653,633.167,297.167,-127.811,342.457,214.044,490.666,311.741,25564,9.97690303513867,13.7057866577646,27
149.644,1877.66,189.25,115.278,-15.3182,813.012,3042.89,254.695,1015.48,684.136,20352.3,23.8477535736751,-2.19385849203241,26
40.7642,1085.02,853.748,562.044,-14.8179,-55.6019,521.214,2174.91,-159.425,246.185,17460.2,14.8909371882261,24.1294203265575,14
240.885,784.735,89.2303,23146,516.4,277.284,1341.04,671.107,-60.9556,12983.7,-92.3923,6.83789259799628,-24.538640600861,24
204.956,516.352,1557.2,-75.8382,129.88,-49.5726,1228.91,2674.47,983.147,309.318,17263.1,13.1361325622334,18.3006714723975,2
134.601,1271.65,1168.55,240.738,-92.4111,-155.052,-464.511,2989.4,597.32,963.167,22310.2,27.119231582796,27.9103080356686,14
120.623,412.74,3155.41,1217.97,-103.916,100.799,3987.71,2307.85,-250.567,129.371,1791.55,7.52477590478469,-39.5148905743604,21
107.008,274.389,286.361,837.479,-23.8465,219.742,2504.91,1995.02,524.468,241.672,1646.99,-10.1116044368091,-38.336645464824,21
950.482,885.468,137.905,863.746,10.3549,888.795,5328.72,1016.37,550.549,327.953,93.7252,10.828281140315,-38.2773459379845,11
278.698,519.975,244.504,1515.95,-65.9055,367.571,7542.07,179.001,313.538,1054.8,2361.21,15.5597195181792,-37.4204785176791,11
150.12,4670.43,29.9109,-55.1202,111.951,-49.4835,3626.73,427.612,677.751,703.096,10110.4,14.7585130769811,-3.39754011624743,11
102.699,124.369,61.2403,45.3122,20.4237,306.519,2021.24,830.055,607.186,1074.44,11118.6,7.7091045933656,-6.54894703276427,6
60.9553,293.683,-21.0986,336.194,28.9789,489.432,3934.32,1426.61,139.248,2171.5,580.639,5.36040749441702,-39.186657312898,21
114.456,438.96,162.655,904.982,-116.189,-160.922,-225.449,1739.6,271.224,349.467,21373.6,23.3011720996249,28.38850239643,14
86.2711,3218.77,130.826,500.904,407.901,-64.4703,1071.52,681.889,183.925,1009.99,14725.8,4.7678324129186,14.9948042024449,26
255.423,247.754,153.505,42.2643,-38.1807,-366.969,3889.32,133.659,1804.64,1549.2,55999,32.9271784847102,-2.06328656783969,26
383.04,482.954,41.5278,724.425,-97.9576,346.441,2003.19,206.768,246.6,168.462,3424.1,-10.821815267891,-33.4022171695265,6
233.947,265.56,137.002,581.449,6.38935,647.196,3622.49,746.93,781.63,366.026,-107.896,3.44223285568872,-39.5698334023586,21
187.325,418.709,135.062,25122.1,-152.516,646.754,4087.81,793.9,262.217,4033.97,-103.474,6.57616847292941,-24.6959969215997,24
90.9341,2354.11,2380.04,613.47,-46.2725,-97.0433,728.478,2028.36,539.893,521.822,19748.6,15.7273422444704,18.8494223133311,14
225.602,618.893,653.485,586.64,-53.9319,48.5899,-700.215,2652.23,315.893,345.927,14655.6,7.14235835044636,36.5772048053703,14
197.395,2068.49,34.7548,575.645,207.182,-8.14599,2378.06,415.585,104.112,211.035,25206.7,25.875436068765,0.855111239729999,26
112.959,222.663,361.763,578.045,66.0891,37.0205,183.759,1642.53,123.843,176.71,18486.5,17.0289369513484,27.998826411422,14
555.643,1773.06,134.749,654.217,46.495,-117.946,783.351,153.262,270.363,300.154,27603.1,28.7186887364802,7.00105185383344,26
265.497,385.429,193.854,171.815,12.1464,414.369,140.24,1119.08,1046.73,285.686,565.455,-38.2490771821578,3.58695646803555,25
263.968,1749.14,1686.92,101.962,19.302,484.371,985.211,2385.69,1613.23,2113.61,26924.8,26.7923016140582,11.9898129756817,14
151.988,538.48,86.149,2482.33,-189.597,-15.9958,-295.911,309.461,34.7655,511.618,9026.91,-12.3235840083964,31.0282518193198,23
158.928,345.593,122.963,587.617,34.9996,441.618,707.235,1432.09,206.364,138.242,508.408,-27.3449745736225,-11.2475462842311,28
131.372,839.28,644.293,19.0269,120.257,31.5153,708.653,1790.32,369.009,798.592,24116.5,25.0306104753039,16.2304737013443,14
77.4519,1385.13,781.221,656.922,-129.034,-74.92,-14.6416,1266.07,791.561,336.723,15063,7.01807348806146,26.9790369168288,14
194.02,294.876,498.547,593.733,-86.3312,167.45,1084.74,1885.32,540.846,221.091,678.718,-24.6212593185858,-20.8990096407569,28
185.216,415.445,104.555,2427.35,218.002,450.254,2533.38,495.895,681.641,5672.13,1755.49,8.62284077833466,-28.289357832515,17
881.304,359.645,79.7775,873.537,20.1152,92.935,3495.97,340.998,160.996,224.601,6723.21,7.25336791412974,-33.0839348304258,10
255.893,228.002,130.643,1043.37,11.1313,215.885,143.839,1151.25,156.061,203.287,1102.26,-33.4320318425978,4.4239975899247,28
198.02,1036.06,465.229,584.486,103.865,33.2491,832.135,1514.94,269.461,237.373,16923.3,13.6050593550198,20.7301958844121,14
487.389,793.519,62.9419,571.66,-3.01739,210.33,89.7188,378.223,228.403,169.714,1864.48,-11.6118639347847,5.83592304851668,25
135.136,402.891,108.597,7103.9,-123.49,926.396,7716.94,927.309,516.722,13724.5,1020.17,15.8430063337877,-34.3395174080013,24
41.4976,270.434,210.679,178.876,38.4386,-0.0743782,-308.222,1553.67,777.436,767.036,17104.2,13.3159493878535,32.4813592487262,14
137.927,311.483,471.558,126.194,-17.1728,-39.6932,242.483,1852.99,332.113,1270.03,11946.7,0.324256133129881,31.7015007680816,2
210.504,247.595,42.5219,1216.87,25.851,514.53,3554.05,148.432,403.036,231.333,2132.1,4.36191417104881,-37.5532206284349,21
79.0557,925.974,795.702,965.949,36.1456,-95.7768,230.926,1315.65,157.932,249.39,20042,21.0771010490042,25.3483220721962,14
75.2483,264.347,349.329,808.407,67.6583,150.578,-42.7297,1544,66.8709,212.951,1989.46,-40.369504135159,8.92665505261383,28
145.079,419.001,283.905,184.53,5.72391,92.4477,290.205,2358.91,2064.24,123.346,556.691,-35.2863529223091,-1.34098462258904,19
61.2719,233.423,111.507,6578.84,-153.945,-145.525,6634.46,671.948,386.577,25883.1,-196.45,16.6195148338267,-24.469092113815,5
372.63,261.342,189.105,693.469,-9.81775,116.147,2680.38,591.461,444.095,189.917,731.407,-5.14692421966379,-37.3042554517263,21
130.039,142.23,123.761,952.74,2.92969,1575.07,128.196,358.763,229.126,191.696,345.661,-26.1883268402021,9.34091847286994,16
114.866,1424.01,658.632,19.8259,163.764,40.0849,229.262,2927.34,236.804,882.647,16258.4,11.2068918066859,25.9247097382773,14
242.903,301.36,105.044,849.551,-68.8299,436.522,2858.76,1254.47,214.222,234.427,403.058,-5.45186080129053,-39.3085567087145,21
151.983,261.599,193.406,786.582,35.1332,117.338,-230.633,114.725,400.233,239.65,2670.6,-23.7371917624996,16.8970478171663,16
92.8584,1082.39,1110.54,238.514,-22.6583,-210.134,-271.182,2640.32,66.0786,1441.21,23571.6,28.0936159914792,24.8543736572165,14
87.5126,523.013,1483.3,818.955,51.9474,-176.862,-251.18,2874.96,451.691,396.407,23046.7,26.6304340560419,25.8422386644378,14
252.423,814.152,1793.93,104.02,53.649,-105.679,292.907,2357.43,464.19,725.15,31255.1,32.927794813273,11.530477253163,1
48.0389,613.688,683.41,457.763,-74.9678,-136.035,469.369,1104.01,3430.23,3944.39,25710.9,26.5700863073701,13.359537468976,13
303.813,709.17,1427.13,638.892,15.5244,-133.159,1058.82,2790.15,505.858,1149.55,22639.5,23.5265853200848,14.0017570331569,14
211.277,714.232,102.503,442.216,21.2244,124.303,354.123,421.038,1086.48,6202.12,2268.59,6.34129609672278,-14.4842516610422,17
181.707,361.246,312.833,655.712,107.849,202.51,889.774,3810.23,371.711,352.874,1508.98,-24.2024631174829,-2.92742349385251,28
500.625,952.506,53.4787,1005.9,96.1191,315.504,6426.79,268.297,310.504,5765.34,560.563,13.9209004560211,-32.2664113793184,17
240.323,280.373,22.1938,582.585,37.0719,156.912,190.504,1798.28,62.9393,245.916,1607.93,-33.9072549242065,1.42736298303971,28
110.049,432.765,118.864,6086.84,-231.868,584.52,6862.73,1399.26,-106.855,2039.62,489.818,14.4026020355805,-37.5362763686612,24
382.959,454.689,61.2521,11735.3,-357.452,160.287,5842.17,1668.91,23.9559,3114.09,-399.747,11.1645779578814,-33.4482696000116,24
107.895,1221.63,550.582,577.361,-0.429966,-100.444,118.321,1300.71,373.185,455.65,15459.8,9.16295424197701,26.7854112015114,14
170.391,914.137,1664.85,561.059,89.8642,-39.2874,-592.953,2911.39,471.248,559.905,24963.8,31.3535451899872,26.198361947368,14
112.665,145.987,8.49006,668.823,32.7291,-261.163,1988.81,769.453,23.2216,67.3274,38431.2,31.7420741493658,2.89436511142094,26
38.5452,302.755,37.7775,1093.19,87.129,373.779,3283.19,994.207,166.641,235.954,-112.508,-1.2887857672377,-39.8255205522797,21
86.5394,267.802,181.065,1093.94,-27.0775,2038.57,847.806,209.45,210.234,169.293,815.988,-19.5674798456312,-9.44446538639623,18
109.56,417.545,419.656,782.482,-28.0711,167.211,-178.05,1713.31,368.988,247.22,602.783,-42.372847087068,8.43241652507301,28
106.499,265.745,21.9477,1883.99,85.5443,203.26,528.84,449.908,463.611,97.4906,2262.15,-24.1021500024806,-1.71994728628613,16
94.5135,943.189,77.9208,-39.703,80.6792,296.582,646.398,320.899,7.91585,729.979,3328.23,-9.59699794346046,10.4855031932462,4
117.789,644.48,93.74,898.067,13.3216,191.04,201.47,131.679,120.947,179.3,1301.31,-22.172275201867,14.1608143198852,16
164.437,1285.37,186.751,889.894,36.1366,169.618,774.854,547.855,371.845,186.42,538.47,-16.662521386292,-2.58327706682484,18
74.8639,163.326,22.144,1908.17,-19.8336,471.083,1978.05,958.352,309.228,1992.97,957.132,-10.7311977865623,-32.1184086010319,17
76.4361,223.658,103.225,113.512,-32.2157,31.4296,2063,2383.33,-7.17591,760.902,1472.56,-15.4314782831826,-32.2768702495446,21
204.015,616.081,445.509,173.849,137.138,-154.512,547.304,1662.81,1018.75,970.177,19722.6,18.3731416677447,22.5491646544937,14
256.497,525.07,146.467,4565.38,67.3332,715.794,5230.91,1079.31,195.727,7190.84,-644.492,13.927897856964,-32.0573247734008,17
175.181,1556.71,1182.03,601.915,-17.417,-84.4215,-16.9987,3384.06,-282.233,208.87,21129,23.561426734244,24.0683407617964,14
305.111,601.397,85.8295,612.428,35.8472,-175.466,1319.83,99.0036,147.251,60.9032,30263.5,30.1465779984853,3.65250734748419,26
118.584,1303.2,125.019,1623.81,173.904,-22.9171,234.633,220.381,306.368,331.607,6058.07,-11.9169273754756,19.3705524931685,4
70.8318,496.479,476.52,752.37,-20.0747,-54.9685,-332.263,1620.24,402.607,262.979,17574.6,16.1802501300417,34.329412663936,14
113.821,279.437,260.418,631.21,-5.00252,93.1636,2455.18,1931.34,674.634,51.7644,1730.61,-9.81045704083584,-37.2825654802863,21
153.021,781.952,683.724,126.878,69.5234,168.539,596.824,1854.15,1273.55,657.944,17085.3,12.1645829689728,23.7009584676193,14
256.561,413.288,229.975,1194.9,-142.005,145.578,319.311,1715.74,206.607,318.363,3600.62,-26.4713785668097,10.1900772636384,28
365.223,300.257,86.723,233.999,35.7675,381.493,2401.86,1691.68,164.067,798.06,1994.59,-9.15336884007822,-36.0840029614469,21
198.119,163.13,323.878,815.291,38.3642,499.485,2125.49,686.563,260.005,58.7166,1390.95,-11.0316521521204,-34.4045112771589,18
204.937,438.86,47.606,1089.37,107.645,276.975,10990.2,177.372,202.673,-30.5983,12811.3,18.0492580701453,-38.7992099311345,11
177.286,301.838,186.553,1102.88,-82.7577,1247.05,6033.55,702.561,146.971,345.788,346.967,13.698899312714,-38.0566052770029,11
151.18,716.312,844.833,32.4421,104.439,-63.6963,-345.354,2438.8,633.547,840.754,23382.4,28.5245292105689,26.6349668032936,14
261.626,1180.55,935.166,343.042,88.6948,-88.7615,496.868,1788.33,1089.7,326.471,17945.3,13.4325692551993,23.3162578374534,14
239.9,240.886,137.006,956.302,-91.3036,747.037,3134.75,774.749,268.756,206.345,2335.51,-1.01185984742075,-39.0983510799089,21
125.137,258.977,83.1462,754.294,166.84,173.671,579.63,1073.12,506.866,137.283,1210.7,-30.8122559919255,-7.0551704932736,28
64.119,294.41,224.744,679.927,32.6794,90.2753,1015.53,1286.51,143.966,157.011,1247.8,-25.4171125887137,-19.5471315264988,28
154.963,242.331,1105.17,733.826,-50.5486,88.8615,96.898,1657.88,218.321,218.18,1122.36,-42.3259553242243,5.74715706374134,28
172.65,419.89,662.974,725.112,115.287,233.498,363.464,2668.61,45.8105,391.315,4404.38,-16.3693128472061,19.2123512687818,2
74.4738,3360.46,261.494,117.718,222.705,30.3586,177.017,1305.45,891.268,-95.8567,3311.14,-0.403045978922674,14.0656255759168,27
185.512,849.671,2436.78,331.653,-73.5426,-135.194,406.914,2788.5,351.222,821.391,19707.8,18.5044100327987,23.0553234396079,14
138.301,2099.57,437.482,941.061,38.2593,-8.5684,460.405,1966.61,512.963,239.069,13587.6,2.58944389461219,21.8131728009517,27
190.282,1660.4,727.291,1079.39,-88.0535,-146.431,18.3931,2055.1,237.124,162.704,19221.9,17.7854717605326,25.5327492091851,14
167.583,2197.82,486.971,780.744,-82.4701,34.9145,746.022,2040.75,-49.6048,1213.44,5043.64,-3.91398994706074,16.9011790875092,2
178.131,814.628,552.122,1575.72,-3.33016,-13.9429,262.482,1263.05,123.695,292.205,17563.7,16.6800155153794,28.7797051474748,14
332.116,473.584,-19.6584,3129.05,73.5466,-85.0907,1731.3,543.598,233.878,32645.2,-1101.79,18.5633902118008,-23.7200609259705,5
44.9512,339.712,534.892,614.069,12.3669,12.8993,1268.34,1905.96,80.8836,91.748,8011.87,-3.43847697532786,6.60481431695652,2
207.742,332.129,88.995,737.563,1.48968,335.861,657.006,912.398,456.513,399.057,1878.36,-24.7531793502125,-6.86964908861975,28
812.598,906.506,513.539,191.847,79.9348,1290.71,2608.79,2131.89,3177.84,1237.31,104.778,-10.3913436821325,-26.1181301874757,25
111.466,2103.54,662.482,597.135,4.26285,-6.66516,734.766,2097.25,492.58,170.566,14748.1,5.08586179339763,20.6371170098521,27
188.007,652.2,141.402,1137.93,-95.6115,922.178,5117.28,1047.78,556.136,228.863,1697.88,11.4661945527988,-38.6171600233889,11
170.77,291.826,49.3864,209.199,19.5497,203.297,-197.255,585.636,264.297,726.27,868.363,-22.1815509869818,13.1750224020489,19
150.686,615.852,234.895,574.133,30.4045,402.912,1375.57,2151.62,44.7009,218.196,1275.79,-20.5257913541809,-23.3531220098886,28
223.839,3475.32,927.844,44.8196,21.9679,-169.056,612.914,3034.69,456.56,771.58,25608.9,22.1710942325136,16.2661275690455,14
127.887,223.322,106.683,1100.8,-62.1169,296.689,929.443,2404.11,232.435,231.712,299.998,-29.0678576658339,-17.3366066318366,28
94.0071,363.286,62.0987,845.098,174.404,322.109,236.528,301.787,97.8593,314.809,2209.77,-25.4163874857024,10.5414261252175,16
248.476,1416.79,299.26,552.671,210.509,-183.354,1349,2083.4,60.9535,262.036,19846.6,21.3451189150486,12.7069346795545,14
133.404,403.337,500.913,618.326,-10.1168,91.6881,588.068,2919.5,89.9247,248.278,15020,8.94513169155043,28.3653281774071,14
224.159,267.685,87.7061,1715.71,-10.0878,156.137,232.803,220.762,262.281,124.804,791.601,-22.6956059351533,4.01440120940871,16
328.326,346.875,183.853,328.741,-50.4606,1427.9,7416.45,788.473,406.795,960.062,1054.21,15.3590678024656,-38.1525096289857,11
155.439,1427,893.161,374.462,142.712,-2.3895,92.9491,1614.06,973.991,623.028,11457.5,1.33986225170361,23.6241463591216,14
180.757,228.615,248.54,877.221,-19.4606,1631.04,3034.36,722.155,-83.0236,323.055,557.664,-2.43531802903001,-38.7448109806753,21
153.434,283.989,330.194,1500.38,77.1586,258.668,873.453,1383.48,378.065,119.653,3708.9,-23.6343948851493,-13.1067632408907,28
173.744,2273.65,1062.69,-3.54999,224.473,-326.033,16.5317,2790,2800.61,3914.78,31619.3,31.1326784339306,9.97394842122905,1
116.55,194.457,357.046,216.369,-49.693,228.632,614.417,1645.71,789.901,1110.88,1418.15,-39.5680466326969,-10.1117590411663,19
130.631,894.545,364.007,1112.59,96.5313,99.3536,501.201,1517.59,299.703,196.732,5923.56,-9.18232588431002,21.9026100691504,28
906.786,2141.54,41.4998,729.377,94.0086,198.57,478.86,12.787,595.787,275.523,2821.08,-4.35223438600714,1.33108020492412,4
196.756,724.111,1056.97,31.7158,14.3278,-95.4282,97.6984,1957.71,428.727,785.754,21381.8,23.1684486285366,24.6647464884998,14
242.48,387.238,429.614,639.089,-16.6377,187.353,413.604,1347.59,139.533,269.182,263.896,-34.3802163185897,-3.01341120266085,28
289.15,765.47,1890.13,156.571,119.825,114.413,524.977,2796.94,504.253,845.574,10402.2,0.551592336955962,30.0249071236534,2
39.5099,2879.52,766.862,896.003,18.3315,-107.321,616.576,1903.06,480.743,138.066,19762.1,11.0656907318826,18.0044153636731,14
131.855,731.641,85.0956,86.0331,-2.58714,186.587,501.634,373.897,291.526,2335.38,6406.17,-7.62288642853818,14.7162863083939,13
192.965,280.884,20.5533,860.47,89.331,131.175,1245.18,338.102,-20.384,281.554,-82.7267,-16.8330303300172,-19.1158792241328,18
67.8616,2258.64,885.587,621.763,-39.8259,68.5532,-298.098,2080.39,226.353,197.769,8879.67,0.751715331701893,18.3106003961688,27
139.656,226.393,166.098,129.092,-51.4337,2140.74,2691.51,1274.78,826.079,1605.16,102.912,-6.2240463016132,-38.6316460939135,21
123.335,2186.73,786.925,103.434,-58.6322,-42.366,-108.407,1125.04,523.783,786.536,22112.6,20.3905857788759,19.8079174518831,14
115.251,352.81,581.236,24.6578,126.638,227.156,-535.531,2355.25,1054.33,529.796,23814.6,29.2200426609802,26.5112989177333,14
131.256,374.86,123.771,-53.381,-54.9183,374.012,579.954,706.462,1393.98,304.562,1069.52,-23.3724096547471,-1.83305871582225,19
20.7921,208.843,191.311,-58.9103,-57.6327,258.523,197.744,205.428,1041.48,-463.037,864.065,-22.453342544109,10.0256760893588,19
153.598,260.173,689.85,18.2001,7.70885,50.536,1026.36,1504.18,-65.0465,934.895,11743.7,7.16768773131344,18.3598283615474,2
157.749,353.258,98.4988,23.4709,241.921,16.4147,1325.92,387.114,885.974,-22.8122,24551.1,25.2220915541417,7.48320588127416,26
154.601,408.736,94.3737,201.485,-13.1448,828.759,2468.65,544.211,1054.21,272.334,9504.2,1.33415153019952,-26.0701510661341,6
60.0978,350.7,49.4819,197.411,76.0723,373.149,350.194,1777.71,-117.377,962.387,1008.53,-39.7591286299047,-4.1919225663314,19
475.413,412.901,256.257,819.354,56.444,640.907,3242.43,912.462,341.379,-117.837,4833.72,1.05035310026231,-38.3952291096095,10
163.95,422.229,343.155,203.672,103.898,338.695,1607.47,3182.28,-1458.08,908.98,56.0835,-18.6467029457146,-22.249270856378,21
158.652,478.472,294.494,797.442,-37.5253,478.844,207.079,1336.83,1457.11,307.529,138.809,-38.0973808093108,1.46635466958692,19
36.1618,792.327,208.211,602.522,96.7765,313.446,186.294,1956.68,-596.737,-254.839,972.037,-37.7977427411487,2.98250754245154,28
121.3,342.584,139.688,124.972,-47.2036,798.619,1237.53,507.132,2541.63,-168.205,3582.59,-14.506613707288,-15.2123752406668,19
412.177,601.686,215.479,3076.86,-613.184,-770.496,106.593,165.884,19294.4,46544.8,1835.24,20.9377687232618,-23.2371941753633,3
98.4074,217.019,172.817,61.4469,14.3127,327.1,520.627,135.338,1130.09,368.703,302.023,-20.2808624412824,2.77265758798473,19
60.6675,431.183,119.707,60.662,133.865,640.385,2407.41,945.074,103.38,782.575,269.377,-8.52541902468101,-35.114099124538,21
89.4357,328.235,320.301,170.25,-141.054,329.046,1228.1,1437.03,5944.08,995.308,1964.69,-5.32434767820638,-3.49600930233597,15
58.8752,264.962,251.989,-77.0453,-70.4942,583.733,2239.5,1120.31,1234.39,283.015,1423.62,-11.9954114797093,-36.7893313953051,21
101.692,387.487,314.466,82.8995,-77.857,321.604,78.7105,1356.75,1086.33,668.275,1946.32,-36.8487527357931,8.83256608827024,19
8.27789,358.344,99.8417,59.0663,-4.40011,440.07,2137.95,799.031,1256.68,1001.25,16138.4,17.2007636125442,1.95235669433919,20
186.442,513.871,145.886,493.172,-167.88,920.608,1577.18,401.139,20693.5,481.984,1064.53,-4.07726793209138,5.28385750238479,15
125.614,524.005,193.033,63.9624,111.396,427.494,229.274,426.683,-229.832,1196,669.015,-17.1127977953976,8.37935182339663,7
1350.29,421.296,238.335,322.068,-82.2562,608.33,2506.05,1798.04,-357.889,723.856,-301.999,0.839023761883863,-27.8047959562599,9
487.18,345.31,287.295,850.962,-84.0729,76.2719,6297.99,273.254,163.587,360.702,17153.5,25.5417715630869,-13.3296379692729,10
66.394,477.766,151.623,200.434,494.534,361.368,-7.75105,1036.28,623.198,745.411,1749.34,-26.4300523892175,5.01193019003041,19
79.7999,1071.54,89.2237,237.906,188.9,218.421,926.891,392.447,-1034.26,876.205,10554.2,7.52625666984017,12.6710344423632,6
11.3128,448.239,229.157,580.468,146.21,320.094,5255.98,926.926,544.165,424.801,5614.96,13.6277204351893,-36.3341450064234,10
294.315,318.697,92.1978,35.0519,22.9168,470.395,1582.35,527.339,512.088,2692.41,8026.35,-0.709428838523112,-15.389032857165,6
149.039,214.495,859.267,-17.857,243.864,242.062,97.4227,2528.93,-570.921,962.732,8062.32,-5.02312838066316,29.8692945271951,2
83.0972,722.746,871.478,149.574,-11.7496,66.6383,358.203,2338.51,-427.238,2463.55,22348.2,21.9461761710923,21.2996553768761,14
-23.1052,301.403,191.444,165.822,-107.724,313.702,1033.47,1765.72,2179.72,-156.647,2329.51,-23.4733591972759,-12.3702772706228,19
92.8995,193.299,61.9097,4134.11,251.096,216.643,572.81,261.461,511.916,30424.3,-2413.89,15.8624165218233,-23.6661286463377,5
146.612,387.162,498.769,92.5743,-80.1729,301.575,314.19,651.571,412.525,712.927,1091.51,-24.7269501401362,8.03478877211157,7
528.337,1873.27,231.454,129.433,-74.398,439.779,57.3859,251.457,425.479,826.732,6853.04,-3.71561395752571,15.755002845392,4
141.32,394.902,379.127,1550.29,147.469,234.951,5357.1,977.995,649.108,711.234,28418.3,27.1872887167265,-6.19341436130178,10
46.3279,264.563,245.673,1157.72,-179.277,373.401,-433.875,23.7887,720.219,-410.336,5770.6,-19.6264670026181,26.8094290534159,16
46.5833,245.881,153.941,31.7204,74.7357,369.542,1475.97,671.493,4367.43,324.933,1483.1,-11.0036623725025,-14.2553170687857,15
190.926,531.097,196.683,470.745,-57.4068,617.986,1767.65,1043.63,776.361,1258.29,-236.046,-14.383357556413,-28.6387439282547,21
152.985,330.3,465.14,62.5327,83.5451,541.73,1525.9,372.715,1342.57,1044.46,-259.668,-14.3521813840356,-24.3626220196643,19
84.4514,317.002,275.937,103.631,93.5552,470.191,-107.631,1336.02,102.423,805.809,677.242,-40.0259546220302,8.66310677621392,19
97.322,334.567,960.886,131.683,73.7161,176.914,-3.38916,2042.3,456.075,976.462,3726.37,-24.2772336232675,20.2853433601711,19
248.624,1256.31,98.1058,2029.38,85.6685,591.235,4559.58,99.9673,610.242,473.939,15486.2,24.0817252850081,-11.3063991072937,10
132.51,388.331,80.7949,676.388,9.73483,1303.87,738.913,478.371,890.837,686.623,5390.77,-13.6918983439827,9.90043553289971,6
247.553,1198.15,175.157,54.2502,27.6228,564.599,452.529,1299.28,-124.928,766.569,1240.98,-18.3606295694687,9.3960350625557,28
147.398,564.39,610.299,209.813,-72.22,739.126,4189.62,1532.74,1474.69,-184.922,739.111,5.04881505023495,-42.453694891737,21
164.999,382.908,132.275,54.0684,-111.442,225.276,1285.99,310.877,1081.99,14073.9,715.811,12.9485797022228,-19.7847235117358,5
12.8386,372.181,233.975,44.5145,26.7328,912.639,1011.12,796.43,1561.62,1343.9,34465.8,33.9088231605417,6.80392390168904,1
83.5809,379.595,169.813,432.608,148.535,415.682,1086.57,1493.52,606.328,857.725,-165.352,-22.7926478182499,-16.8079794511606,21
26.5601,347.915,447.595,79.3163,-30.3884,144.153,-168.426,2059.48,919.201,-641.475,24187.6,28.0659043378004,22.6501938785414,14
85.0428,288.028,185.506,196.995,-29.1338,315.568,3638.54,16.6239,666.115,711.424,13275.3,21.2583455134213,-11.3493263647467,10
83.1672,1013.65,351.877,182.777,-119.748,100.628,203.746,1094.09,16596.2,-512.287,19186,0.395459807569041,5.16260856965123,15
30.3504,1046.17,814.119,119.489,4.91898,87.0402,47.0511,1304.25,1030.2,1215.05,25846.8,29.8646697687308,19.3051281047945,1
695.544,606.38,461.762,733.007,48.2776,322.804,2462.38,358.542,-21.2929,396.328,-131.955,-4.7443205687752,-33.6172897423529,9
164.553,312.235,183.249,109.385,-44.8226,564.324,-238.429,647.362,1250.95,-15.8578,693.541,-36.0507009118045,12.2700750864024,19
204.547,493.409,198.987,248.311,-6.67801,450.499,2101.93,50.5758,973.359,-633.421,2129.57,-11.0668495635814,-34.7035805346189,6
185.993,729.744,782.227,205.062,208.799,76.2981,487.121,2697.49,-440.659,1101.84,23425.2,25.1055413824164,19.4418426883923,14
-1.34934,465.237,161.125,105.025,24.0583,287.782,73.3935,549.366,419.463,1026.41,3091.19,-17.2755569875351,15.6312875437547,7
102.558,2228.9,249.796,896.891,33.3918,150.106,407.62,169.925,302.475,129.675,30909.3,32.0292549547955,10.9063209641943,26
138.192,421.631,192.104,122.327,112.845,512.047,366.854,379.557,-420.568,865.217,537.114,-18.773775131784,6.27793307503333,7
4.3421,265.968,318.028,344.198,108.005,369.432,755.275,1021.41,1009.85,198.88,-159.351,-28.3986628361701,-9.58539175510843,19
120.936,534.492,400.715,707.16,-99.1896,310.87,280.85,1169.19,1490.1,-763.552,1356.17,-30.4011342700808,5.40128930074871,19
57.5686,349.179,140.267,135.76,-78.9429,646.274,867.405,359.995,926.01,401.586,18714.7,18.2944336950615,12.8291643150507,20
113.212,2111.02,710.91,155.505,-93.3438,255.461,90.0604,1483.3,1461.59,167.601,17228.9,6.49466179203066,20.4169281570521,14
83.6947,435.051,1611.05,1.89036,14.7308,1176.36,-150.93,1776.95,1330.83,594.325,13420.8,3.62641659026034,34.7496904386821,2
101.325,297.265,703.775,228.772,-139.342,239.051,898.528,549.876,1358.05,105.768,81.7459,-22.1509480715965,-11.5390274677032,19
53.2424,298.957,334.379,88.3018,-68.282,323.836,955.938,866.23,-497.086,824.822,-1236.79,-21.8260316136898,-15.3700031798115,21
359.806,1296.98,190.558,850.731,-125.606,459.799,8119.53,1138.37,-2.66229,-271.793,2627.82,17.3026194905814,-39.2292911175398,11
137.659,1061.38,177.541,771.979,-30.1072,-26.1031,1269.31,25.4298,409.696,-376.765,26200,27.8323041265251,5.88819972473523,26
102.701,488.253,223.924,99.7968,70.2157,421.424,71.599,943.243,591.468,864.517,-427.862,-31.0225491158062,6.28358031607119,19
192.226,627.073,111.833,76.0566,200.094,354.965,3004.34,445.031,7.18851,727.683,6862.69,1.71783551180875,-35.47504638312,10
167.331,451.447,138.845,113.118,66.7693,262.62,206.613,1682.12,-164.189,3617.61,-587.978,-3.54773115566227,-2.04508664147437,17
87.9591,734.725,336.177,93.3961,-62.5063,533.155,1091.43,661.173,1086.85,394.62,1181.7,-19.5592207432299,-14.844462119864,19
89.6101,508.977,833.426,48.6015,-138.917,-119.121,1072.46,951.1,28862.1,459.849,29501.4,6.91736862877352,2.75572868609651,15
140.461,567.924,284.574,126.782,-94.6084,376.317,2996.32,646.756,899.593,613.248,2397.22,-2.66723568864285,-40.6149926485063,6
163.654,500.562,146.8,138.654,52.6711,252.034,232.931,557.955,243.337,879.842,1859.11,-18.6017384012919,12.3990731653138,7
46.0873,428.635,1244.04,275.502,-65.2286,89.5123,-698.058,1637.94,1595.62,380.595,21766.7,25.4703688715325,32.3301268566535,14
139.737,444.699,223.744,163.781,-59.6089,341.681,-116.761,1165,1138.73,47.6609,2546.4,-32.1606649377029,16.0818276676554,19
107.463,352.764,185.689,1506.65,-15.6166,466.878,686.657,238.506,815.813,-241.562,4370.06,-15.6606951883104,4.77520178436786,16
251.976,369.855,337.2,243.544,-109.341,642.142,2570.56,781.815,1191.76,-485.854,799.824,-8.40661117334588,-40.1989639077806,21
87.1545,208.812,180.333,855.252,86.0088,1074.45,1485.03,636.688,-68.413,73.173,169.222,-17.0322275174867,-24.3930729141843,18
94.1626,498.442,188.638,156.933,-17.5947,167.952,924.125,302.863,1230.55,568.745,689.99,-18.4901685387387,-9.34907533356557,19
98.903,312.873,1037.71,-11.0949,49.9167,198.929,506.054,1848.17,1160.84,129.961,10449.6,-0.711588928929125,28.9161026839974,2
272.889,201.263,229.896,-8.38387,-14.1457,472.263,1171.64,81.2907,588.456,1739.83,4527.51,-8.88248923742045,-14.0082674310095,12
170.766,329.217,260.468,196.012,114.459,908.393,3021.76,444.603,28967.8,-976.563,16637,-0.962037691491732,2.9710311800116,15
186.944,284.423,187.003,104.806,-14.442,401.72,-237.742,911.64,1064.96,-303.297,1357.34,-33.6444379148349,12.9891004131523,19
171.197,1873.49,93.066,52.4618,63.3145,351.962,1794.63,616.183,2724.41,-309.797,17398.6,15.1806307161701,6.63013379208998,26
109.129,311.287,129.971,222.699,-2.43602,513.412,930.078,453.194,2048.44,41.6326,4716.8,-15.3839267261686,-3.93277510457281,19
1527.21,554.816,197.241,261.709,-19.0309,63.3541,772.081,508.784,326.009,17677.4,1566.09,13.1107018734331,-18.7234682312756,5
125.282,315.83,210.926,116.519,101.712,317.316,389.602,558.467,3330.69,1355.77,1301.99,-9.69240607327445,6.01113905346495,15
64.6849,353.959,152.474,-49.1747,-29.2326,441.897,7720.71,486.363,1364.59,741.004,2905.21,15.6500194850204,-38.4616176798728,11
477.755,254.816,190.265,51.2213,188.329,-332.428,3412.3,494.44,-465.544,884.533,58082.5,35.225322601643,-2.68636684658224,26
209.707,314.23,233.525,68.2197,56.0761,196.729,1822.05,273.674,28.2107,1093.51,11440.4,12.1249361037769,-2.74971894070631,6
1231.15,558.928,186.656,66.9601,53.1857,180.523,2856.73,290.272,-489.044,1118.07,20933.5,24.8586061469954,-3.51366544021973,10
387.054,676.63,109.655,824.109,-8.10445,206.825,757.29,45.4625,-74.5753,-37.98,9101.64,3.71085277094472,9.21195525855248,16
15.6215,350.327,378.91,28.2519,-66.2078,180.926,-11.2583,2003.48,1214.47,326.29,19816.6,19.7284538776355,27.7516623094423,14
177.241,1518.31,261.41,132.835,-6.0295,246.349,1483.77,-98.7034,922.972,221.897,13057.4,13.8829628143157,3.77215673963766,20
112.912,432.836,356.677,16.0217,186.153,527.725,2589.74,783.407,-992.236,6030.79,16168,18.4951177764545,-8.00440830221188,10
163.484,355.314,215.163,676.783,-4.96781,618.784,3133.85,455.104,-80.8328,-790.563,2083.76,-1.93452239354958,-40.5834428765463,21
133.456,472.521,831.524,38.2271,66.3638,321.84,-0.34232,1141.52,883.398,34.375,4886.76,-16.9541487574903,25.0953800425071,19
129.861,1418.37,249.594,1102.51,192.404,-45.4004,622.654,186.491,623.498,-571.32,35830.3,34.4358008555127,6.98969501022275,26
289.286,441.236,172.439,60.3746,-196.136,99.5895,1684.52,111.989,927.649,122.082,25497.2,25.9323931616049,2.080424020558,26
-10.3779,2327.29,987.286,152.603,-104.369,501.71,331.84,1370.15,730.134,1056.21,13816.9,2.59683403498338,17.6669752634627,27
406.34,488.15,112.089,683.692,49.9972,321.657,3493.4,693.28,102.189,99.0295,41812.4,31.7078441570918,-2.70734676815639,26
84.5361,242.221,550.573,299.99,-3.54347,408.483,-338.961,1806.98,2431.21,489.456,6868.82,-6.43771221090454,28.9235480990324,2
112.207,415.855,401.903,11.0826,65.5628,231.361,39.6239,1742.19,101.517,1319.06,4149.03,-22.5320330740042,19.7873484119168,19
230.039,1366.9,117.628,80.6905,57.3021,377.521,3526.67,962.733,1261.06,-527.685,-137.133,-0.139808074264836,-41.7455356526276,11
64.722,352.21,200.155,167.687,20.8407,474.016,186.492,1480.61,465.607,791.827,64.0679,-41.6468900371491,0.566998006884152,19
292.313,272.285,243.391,75.073,-1.06876,790.054,2036.66,280.199,-465.851,934.815,82.3748,-8.73894245064866,-29.1746782143935,6
256.878,774.092,88.4123,163.37,-41.8618,491.309,1360.15,484.892,-898.466,1533.71,19695.3,20.3296338712988,6.42704431089177,20
229.927,445.575,349.901,413.264,13.3304,295.408,164.039,2304.24,939.043,11.6794,4221.41,-20.9943626956559,18.2446653141904,19
51.7414,316.975,300.937,43.1189,171.612,452.497,496.08,1206.89,334.198,775.067,106.447,-27.3120563865571,-4.72618058712697,19
212.428,416.085,155.682,12.687,-21.5701,590.956,3635.18,606.088,1206.2,-12.8346,3894.18,2.96275648033777,-40.5956032736353,10
487.954,453.601,290.231,2.13322,-36.4615,549.029,3834.25,356.596,886.982,-47.7679,3659.23,4.84980817183443,-39.0306722109107,10
125.441,494.174,224.864,817.638,1.85335,928.628,961.041,1125.06,4011.74,41.9147,8516.29,-2.02964446837812,12.0728355506695,20
205.569,449.563,59.7009,695.741,73.1356,245.738,2062.38,788.975,-943.372,520.986,71.7472,-10.3685680291892,-31.1686553717173,18
65.7798,648.618,2225.51,382.37,-39.4578,-25.3417,286.189,1915.74,295.607,767.847,32570.5,34.2230763248857,11.5428117208581,1
119.295,390.513,835.476,151.457,99.1242,517.634,448.896,1858.55,1136.05,350.698,1089.31,-39.7553749930984,-4.2528997908742,19
68.9164,787.793,563.816,391.698,24.7412,319.563,-100.612,1587.5,288.087,724.479,3647.41,-21.9918600822039,21.2393654554802,19
213.251,384.207,163.74,98.5527,113.134,438.359,366.903,2077.7,395.783,925.535,-116.654,-38.4271142943136,-4.85155183173314,19
381.484,371.608,148.991,26.5333,-92.7,405.261,3755.39,8.55297,1446.96,170.967,-173.281,4.13955513635458,-39.0933732572538,11
121.555,3014.44,383.919,330.669,143.396,124.297,313.651,2549.41,1412.47,223.969,14448,1.04299465523884,17.958694024395,27
20.2409,1731.57,681.047,196.682,-75.289,190.544,82.5273,2038.45,-386.25,902.207,9638.95,0.127283429232458,22.441916869637,2
66.8935,292.729,293.303,138.576,-9.3537,414.232,-57.5359,2298.74,1358.66,-544.727,2033.31,-31.8507174062467,10.9508522687321,19
76.5164,2729.65,427.974,244.671,27.8368,337.493,-122.086,1360.26,1149.17,-245.719,17045.1,4.38171833061692,17.2961148988989,27
70.9668,1153.78,827.781,9.30959,80.542,485.73,592.468,975.28,1080.92,315.305,9091.15,-2.68966015682595,20.2835775504474,2
62.1206,12478,684.352,-45.0892,-62.8856,505.485,814.574,2451.33,-126.184,1025.25,9378.26,3.35206628321797,11.5492419869556,27
136.97,555.434,782.368,100.101,-37.5889,72.3583,-153.053,1695.22,620.721,751.652,19463.4,20.4102756902851,29.5406879590188,14
275.258,732.818,217.001,894.412,-28.5746,495.91,2551.52,390.455,248.179,253.805,17269.9,21.4773985208106,0.529880946395584,20
160.197,256.047,229.462,907.872,81.1277,253.393,882.762,929.125,620.834,322.316,1159.75,-23.7100788946105,-14.655840711131,28
48.521,1061.39,677.332,734.234,51.736,187.827,53.949,2429.4,162.659,126.142,18794.4,19.7424647003756,27.5560918209736,14
118.464,911.979,170.34,1.97928,-28.3914,69.4164,180.873,72.7373,1086.6,272.983,28633.9,31.8663011429814,13.4780662195815,26
147.41,641.724,674.034,658.211,-78.4172,343.01,514.676,2129.96,677.03,548.136,376.513,-39.7881762299184,-6.71058256239665,28
289.608,342.974,53.887,249.473,46.7421,348.928,2517.86,707.37,1856.85,23.5979,2328.17,-7.92065374943534,-38.9512133108156,21
13.1011,301.205,1065.05,-174.642,65.9975,187.773,177.814,1412.91,1175.53,-402.934,733.883,-38.0844604260489,3.34500737354173,19
74.484,1107.52,180.993,30.4757,15.8533,492.498,1905.69,95.2979,1000.62,-812.55,15934.5,18.3961342597404,1.43481822279793,20
73.2415,416.22,250.947,576.033,76.8644,328.668,604.657,588.028,48.5344,-332.829,754.754,-25.4930363913362,-5.11262712941932,18
125.522,314.463,57.2082,-46.1038,219.292,453.503,2734.89,100.454,1239.94,-737.348,210.546,-5.59885034748961,-39.0681184148975,21
56.3629,596.045,585.364,13.2584,174.71,118.336,-516.507,1184.55,938.523,-464.12,29400.6,37.2304723217118,18.9784499504401,1
336.838,459.57,120.765,136.203,64.1902,725.165,755.436,763.652,-417.383,746.149,12402.7,8.61779407687793,13.6625063805301,20
82.56,2596.49,2099.89,237.121,-54.2258,390.655,258.05,1792.21,900.252,78.9396,940.612,-0.231078992016218,10.9582304024887,28
177.128,529.008,233.835,242.831,119.255,451.877,1450.76,240.366,1128.06,-11.3367,2622.5,-15.8408348438782,-25.1966978060867,12
515.509,285.546,299.908,16742.6,-453.907,1195.16,1917.77,424.042,826.108,8173.69,-448.896,6.40259390592864,-25.3397611011122,24
264.974,262.106,248.663,693.744,5.50868,473.851,-236.227,868.89,802.24,37.4965,985.321,-38.0241218826145,9.88195420769093,28
164.516,472.884,250.5,225.507,41.8613,157.097,1147.83,887.149,-631.494,18334.1,288.716,15.1742911887851,-20.0377155866405,5
729.117,338.68,528.852,123.135,-15.7285,157.321,216.037,1013.49,49734.4,518.178,1170.44,-2.36842729170757,3.11694580967103,15
24.5259,385.741,263.189,682.82,-135.065,478.61,243.64,1517.66,-264.129,-441.876,821.172,-32.937378878635,4.87890239806517,28
92.7566,335.615,284.547,528.23,66.0393,2635.45,3746.65,1326.49,-279.859,1343.82,3957.21,4.76464184319626,-38.8254484069362,10
83.1374,332.969,664.196,148.966,-64.0795,162.577,258.08,1655.76,-109.467,778.855,13012.8,4.03062361246035,32.0212540865912,2
97.3036,368.27,349.291,665.94,-149.421,542.877,364.039,1849.48,290.981,226.842,-400.141,-43.9018339063834,-4.17652899957128,28
101.225,1875.62,566.517,255.038,12.9317,54.6218,-443.585,1728.18,-9.55991,796.932,25884.7,32.3594695335169,22.0867883250299,1
209.162,290.403,284.133,124.127,81.2052,467.857,1109.15,1177.76,2185.67,-174.191,112.125,-22.497377326229,-18.1286177395544,19
394.75,470.061,116.519,14274,-147.383,635.069,5136.3,493.316,-579.884,1143.75,2693.44,10.6426473194459,-30.5175509236949,24
2.35497,802.087,359.855,49.1748,1.08552,296.234,2336.58,1892.11,908.693,311.511,10189.3,3.49451173461178,-14.5399010495668,20
102.782,564.657,228.174,726.497,214.297,322.236,63.5591,470.127,58.2863,269.22,379.57,-27.0728981262869,10.6316811506569,16
519.18,343.736,114.765,965.173,58.958,603.453,7634.22,885.624,164.552,643.612,3905.23,16.3384319529394,-37.5612086258864,11
97.7861,535.18,252.023,749.056,-86.7429,735.847,1388.74,1054.51,-295.709,697.363,276.267,-18.5981223421002,-24.3876688594815,21
98.2536,525.398,688.835,-77.7937,183.694,133.123,571.562,1712.3,527.864,722.112,20875.7,20.6621672655086,20.7615914721174,14
120.921,1451.88,1007.22,373.323,153.925,114.929,-296.401,2306.67,1390.78,755.674,17581.7,12.6461272848668,28.0303797748133,14
162.145,766.836,415.491,-83.7108,203.407,333.687,477.173,1909.15,1637.62,326.423,28281.7,30.1471885357554,14.4094931090658,1
113.94,302.225,451.94,-17.2421,96.6657,521.986,77.2957,1085.36,912.001,-361.624,2036.52,-34.4796152983587,9.17845780234557,19
46.9504,1348.21,123.577,339.12,238.651,386.441,2292.29,301.304,-126.299,745.42,16277.4,21.1943106768314,2.32420224469798,26
784.015,356.275,266.471,-21.9749,-103.797,598.563,2771.1,-436.156,1212.98,-476.355,2845.17,-1.33242534871471,-36.4620882159106,9
137.397,476.59,159.059,-39.7481,136.74,257.45,2705.1,603.348,116.953,1127.48,24291.7,24.4873978661755,0.0684418671406622,10
28.2382,399.688,208.382,232.974,122.025,589.096,301.702,294.293,986.8,-126.154,2166.01,-20.4987860057747,11.0863862262322,19
188.283,1584.87,616.817,303.256,16.6253,418.891,137.817,1616.13,983.958,-119.699,243.883,-10.4399606760977,11.476449380242,28
129.021,552.174,789.174,26.6009,106.865,180.429,-119.325,2158.84,968.282,397.523,8813.02,-3.52557991731173,30.9979503256368,2
111.553,474.182,608.099,87.0365,-53.2974,163.498,214.164,1218.25,881.24,-235.916,19657.3,19.2477596765871,24.5643786511296,14
96.3795,425.566,180.432,677.594,-26.9084,559.531,322.003,492.069,150.602,-233.305,1689.77,-23.8433149665139,9.55075451426665,16
67.3581,610.087,771.786,47.5471,-13.219,487.179,727.523,1206.74,1494.84,2468.05,17965.9,15.5744677646401,18.3635461767733,13
90.0859,1027.98,368,404.938,172.523,267.739,420.408,1781.29,-931.178,1228.55,8162.01,-2.14713690227322,26.0094166782694,2
305.782,1625.64,1586.46,425.132,97.7906,349.232,522.514,2018.16,1078.02,-382.873,24519.7,25.4516007362464,15.5756974073612,14
359.176,386.865,326.117,-59.2139,-10.9781,245.044,1276,628.589,831.771,895.523,2502.99,-14.0097630051079,-19.2907683099697,21
113.289,260.586,175.224,108.177,283.654,423.673,1881.93,1349.61,-791.128,741.279,920.97,-12.621886995532,-28.8070824345156,21
1009.6,516.313,240.057,574.89,146.233,518.367,5989.69,2130.94,259.65,624.714,515.369,13.991893084241,-37.9884120798875,11
84.3533,317.385,127.938,2.14552,21.551,374.415,502.666,1398.23,-571.056,739.635,44.261,-30.5701562797112,-4.60754472024706,19
418.884,619.317,247.171,3097.44,60.2236,757.102,3953.32,1223.53,354.904,203.824,318.558,4.91351349943063,-37.4276911927139,24
1323.7,366.712,218.636,458.855,121.247,229.625,1456.46,142.094,-156.985,1324.66,5550.04,5.20986890416914,-8.96933596902863,25
81.6938,534.028,170.741,71.9338,-66.5459,394.778,851.348,81.4316,971.904,823.586,5427.98,-8.32904252351801,8.02771334361356,7
183.696,508.359,67.6299,167.578,-98.3365,613.361,2278.74,363.856,77.4296,731.176,7665.39,-1.6186630907769,-28.442030620289,6
564.315,690.045,249.767,950.29,32.2061,1176.78,1472.59,1162.08,586.21,46.1152,32686.7,29.3569554126295,4.05140300359834,26
1145.88,544.821,200.892,1340.09,95.5313,111.355,4544.11,465.102,254.106,7594.63,15128.6,17.095546525993,-20.1110763609743,17
105.683,357.123,105.342,1558.5,-199.286,423.616,-428.469,665.204,-332.279,-477.271,174.284,-34.0361803805839,16.4540206524851,28
233.435,625.719,353.129,635.818,-119.052,436.123,-269.885,1556.31,-585.542,-152.44,-408.244,-34.2267207435844,10.4902228477044,28
1011.21,674.706,163.755,58.4147,97.6417,423.6,3776.41,175.799,-444.307,1075.46,8698.85,10.3233991135709,-30.1503785006879,10
124.952,342.851,216.681,347.958,127.619,526.854,-38.4295,850.83,-125.778,948.205,211.205,-22.7687657810787,10.3129325874178,19
187.959,1033.57,826.206,279.412,-7.6699,30.2323,407.67,1702.55,372.535,3414.51,23735.5,23.8780194441573,18.7501167128167,13
103.644,1422.78,883.552,73.7132,175.055,-2.77854,-20.6263,2061.14,-174.006,736.714,34362.3,38.6583782226597,9.7930482669196,1
33.5733,4140.24,419.633,55.1635,281.941,415.419,-235.801,1608.79,1471.78,423.071,16825.8,3.51037663762033,14.5423319448209,27
181.48,316.463,247.803,-72.7645,216.966,684.14,2090.26,1117.45,-127.651,766.911,3105.4,-10.1409506921072,-32.8364999393396,21
83.0036,357.389,197.228,125.134,-56.9611,117.016,1568.99,147.188,1003.82,89.8582,26862.4,27.3875967781801,2.86489751648528,26
60.0666,171.964,123.524,579.243,89.6308,726.441,191.92,463.248,-989.613,357.471,1018.65,-23.5989252023425,9.78889775229501,28
178.564,195.036,152.208,685.472,87.3593,472.262,3941.64,1448.27,32.2571,-49.7715,-461.766,4.48500782325266,-40.5179975683953,21
389.592,594.183,285.645,106.75,168.763,347.48,889.995,286.991,-33.5623,759.15,94.6409,-12.0454804055232,-9.15734597460915,7
45.1601,440.907,374.109,1.42703,199.183,381.552,315.891,427.638,1087.3,637.108,683.399,-19.8554511274599,5.60181408995153,19
485.003,451.277,194.706,213.295,-84.5396,313.285,1695.85,274.201,2298.57,149.416,624.726,-14.0235441183644,-25.633037451581,19
177.225,479.77,187.488,619.42,-71.7232,555.464,1157.18,214.4,622.512,310.095,3257.54,-14.4677503170326,-16.6196880241948,18
118.579,248.794,267.022,63.4697,54.7889,328.877,219.265,1393.21,697.451,768.922,1889.1,-39.6844370029412,3.0469714696281,19
96.6096,328.014,1342.83,-81.7152,-105.664,345.281,-169.494,1598.71,1084.35,254.297,20834.1,21.8275013714734,27.6871990092669,14
243.29,1015.14,1000.78,69.5093,90.1815,205.336,353.423,2081.93,-686.105,807.278,31971.8,33.5178316333234,10.8932804989804,1
242.031,363.797,434.102,147.341,115.792,440.816,516.758,2422.9,1166.53,404.67,-1194.22,-38.7566625107607,-8.46426494110806,19
218.247,328.204,528.909,49.7656,39.464,462.817,555.197,1743.55,-578.66,759.077,745.217,-28.3451400498772,-5.29356677633506,19
139.286,403.078,254.145,60.3948,-24.0464,437.082,281.65,1740.78,1430.87,306.785,273.128,-40.6215026199475,-2.62132922170151,19
550.521,444.049,343.785,314.026,-119.857,393.856,197.589,348.612,1289.96,114.572,617.755,-13.3713748560644,-0.650499379584132,19
292.452,453.151,270.357,495.267,-184.755,632.356,-187.134,1073.64,170.865,1128.95,1573.74,-35.7759451149403,11.6284937978722,28
147.281,828.658,822.766,127.253,113.452,91.2182,42.3637,1844.46,891.587,-269.862,32793.3,35.909415217386,11.2543343583456,1
130.103,285.044,138.578,3055.25,-26.1344,740.786,1339.14,274.173,409.55,-495.485,5271.06,-6.77118019321001,-15.799453459652,23
278.671,273.868,236.287,2090.27,266.029,390.423,1691.38,659.139,-272.807,84.2923,144.14,-15.2370728176745,-27.8598764277755,18
140.015,506.024,267.685,29.1604,52.1695,1025.74,1557.12,749.76,907,439.836,991.33,-16.3250106772323,-25.9003507237786,21
86.1179,752.781,605.397,127.052,39.75,542.183,-173.639,2403,998.465,682.777,14154.8,4.90748419643189,32.679472206859,14
77.5175,364.354,270.143,171.099,-41.2657,242.313,-196.231,-49.7619,1080.02,480.342,1255.85,-22.02744948929,13.7918354338504,19
297.529,504.533,261.374,218.599,-12.6618,-4.96908,775.924,-210.488,1276.24,-79.1529,36338.8,35.008230407018,3.90568659530144,26
205.507,361.927,398.941,189.364,-173.572,484.709,1738.29,1370.66,1076.91,489.581,2197.68,-16.6809289055115,-30.6565639160475,21
112.22,237.384,357.974,55.6201,-45.3764,1130.62,2452.76,1682.6,594.549,751.016,1958.38,-9.86454073305562,-38.6829004519271,21
77.4331,256.953,603.332,-12.4432,-17.1593,331.465,40.1337,2165.31,-134.867,955.141,1205.4,-42.4744020053299,5.26137973030879,19
95.2416,569.164,995.382,117.553,-1.29697,175.476,320.501,1787.77,585.509,711.102,29123.5,30.7544344189305,14.1604230773771,1
81.2206,232.736,361.748,148.264,242.909,396.249,937.894,1882.54,213.254,784.862,270.753,-29.1360757141595,-16.009321204873,21
6.02377,330.049,874.276,95.3142,13.9203,-41.463,-84.8403,1426.25,-305.561,2135.53,24177.8,25.506364404543,18.2834582432557,14
187.965,194.585,158.733,38.3802,44.7473,192.615,937.099,-36.2744,304.331,834.48,14690.7,14.852741006943,7.45742424100523,20
162.827,303.12,501.478,32.5687,-21.1113,413.103,332.726,1180.67,230.074,1323.36,1375.78,-29.9846062359862,1.21456337429532,19
155.407,398.411,154.349,89.7324,80.1323,468.433,-69.5885,42.2219,1244.27,425.892,14737.1,3.54905775611132,26.5488259017592,20
92.3615,456.872,373.59,564.507,22.1834,436.955,467.742,2021.46,207.865,564.028,824.826,-42.2818273087357,-6.81349541286229,28
187.594,467.945,187.729,13.9118,83.632,716.843,1846.15,-38.6807,903.092,295.647,2322.4,-11.1565279044462,-29.7248985005371,6
15.3254,343.893,190.149,-47.0435,116.308,1190.86,2627.44,1152.46,323.743,736.202,34.2895,-7.2686155192697,-37.2405767299938,21
167.888,454.172,611.349,47.038,6.28031,382.328,816.065,1781.41,1241.29,3169.17,11590.1,2.89273362110733,18.8795207423451,2
169.923,659.655,333.941,348.91,-155.401,504.51,-254.44,1795.53,1088.68,-294.801,1127.74,-35.6003132410989,11.4414260819503,19
295.367,281.533,241.719,35.9082,-25.65,69.2441,2911.74,217.122,1202.44,-182.253,25606.2,25.2313862212385,0.804880355034912,10
672.263,490.322,176.753,365.582,-14.3983,842.536,672.652,-78.602,404.847,1678.49,124.845,-6.90408579301663,-5.10349068594211,25
153.942,412.096,385.368,-48.9295,51.2904,435.437,723.212,1144.84,1012.63,800.339,903.376,-26.2439307170461,-7.73832384999557,19
79.3833,411.351,285.03,782.497,-105.109,497.237,1268.2,320.866,-237.188,-108.384,5483.91,-3.29939750607989,-7.94482498920298,6
-4.3407,1583.79,294.29,133.49,84.5823,553.853,-95.6448,1061.46,-173.971,1094.45,8311.64,-2.99109776879168,22.0209368273127,2
1017.37,616.23,2227.42,337.281,56.43,637.884,3520.86,358.9,-231.327,9544.75,1535.44,12.0913177418911,-28.9597611766275,17
150.755,488.947,96.9979,106.915,15.4832,448.383,1840.59,566.094,226.357,832.4,2330.78,-11.7179456682122,-30.5994255870778,6
-23.6502,1204.91,148.864,-14.4257,82.3553,132.939,-282.883,1701.82,894.351,441.544,25742.3,33.1055589132344,22.630795323634,1
67.53,206.134,351.848,862.779,-12.6082,494.744,2291.66,613.086,-1008.61,320.11,-105.243,-8.63216282187642,-33.2219149615101,18
10.616,1154.09,930.79,47.5679,-85.2141,196.831,-243.73,1740.51,637.767,732.308,23257.5,28.1882875762847,24.9101840227612,14
39.4004,344.035,498.928,198.048,-46.8292,708.397,-368.172,806.09,2130.31,338.238,19593.6,18.8987801390443,31.8289667092334,20
63.543,491.301,354.534,194.172,36.0877,344.151,1657.98,-11.4244,958.641,352.653,19426.5,20.8241782204585,2.80053384461184,20
165.422,420.072,887.292,229.278,-19.0928,476.513,263.663,3536.17,889.006,-148.081,-49.7362,-40.0411310288377,1.66452967737647,28
175.344,456.523,163.515,129.461,-99.8612,664.158,493.915,1623.02,1542.15,229.011,392.939,-38.7410590829396,-6.39164355976878,19
121.572,295.779,329.509,143.019,180.523,397.628,1463.65,1298.39,648.243,798.699,992.381,-17.4547416362957,-23.9579024386485,21
101.267,301.441,408.856,156.799,58.2033,473.997,2015.25,788.401,627.896,1374.04,1213.13,-11.221002711413,-32.4428772840284,21
179.497,420.155,298.036,66.2087,47.412,440.139,142.731,1684.25,1127.07,629.468,5738.97,-14.0968934491379,25.4000645489149,2
83.6381,456.368,593.103,59.5942,111.649,211.134,1885.63,1932.48,1205.76,105.775,14018.5,13.9416056141232,7.72957890135824,20
66.6718,530.755,1171.23,181.601,147.26,322.61,680.531,1641.23,821.253,1074.75,27611.3,28.5671450189716,14.4809862959751,1
77.8411,585.258,623.697,157.252,63.6413,104.667,-110.866,1611.92,2454.02,1748.65,21648.5,22.6162945634444,27.0212531665905,14
62.4616,261.89,109.812,-26.0305,71.5464,263.185,2401.1,379.61,-85.1009,714.644,15477.3,19.1872084609978,-1.22441837027003,20
154.548,417.929,95.5236,1139.12,72.5304,514.692,1065.22,329.63,38.4508,473.792,281.677,-17.2251914617486,-15.8978263614491,18
174.992,1050.59,698.705,108.91,106.498,89.6993,-147.332,2525.48,1478.41,323.27,22329.1,25.7162868965993,25.6083099232218,14
-75.6044,293.25,195.846,180.19,67.1926,290.088,738.829,764.358,19242.7,-652.548,1260.87,-3.54960411692577,4.91062153362437,15
-23.6458,202.218,240.51,-85.1579,506.098,234.556,797.131,948.131,966.163,179.859,3427.91,-34.0574114727305,-12.9943836233152,19
143.506,500.018,145.81,242.209,-178.62,456.874,1379.98,139.076,1665.54,36.9912,5688.46,-6.33708288763688,-16.0619359747842,19
55.2551,454.606,661.526,46.3359,-47.8398,450.414,-119.008,2369.91,1775.75,32.4565,6414.89,-7.17755925582694,28.5754172678603,2
106.277,606.084,248.032,-14.364,-57.0307,348.664,1754.27,65.8032,1061.4,65.9979,8748.98,5.43811711152813,-10.3627207615673,6
121.522,358.505,541.665,728.906,-80.192,461.347,1832.19,3147.3,-245.698,-178.607,126.941,-19.211774728255,-28.1270504692037,21
489.217,579.598,823.258,623.19,100.016,359.035,417.475,2081.94,1377.5,-27.5755,6744.54,-5.69598432879408,22.5397414800485,2
-22.59,545.729,621.616,103.08,-78.2257,285.063,-355.445,1779.48,135.096,729.979,14888,7.68008562131763,33.5834977800238,14
379.522,1012.85,269.588,111.348,-25.1822,640.907,-117.693,246.422,885.352,-197.239,9734.36,-4.06980017727516,21.6618541189077,20
131.486,644.166,100.572,324.451,-97.2658,365.209,326.924,1646.89,2344.22,-254.26,439.425,-24.0893623838257,1.42780883029907,19
183.027,413.182,780.812,117.463,17.0129,271.013,102.745,1547.56,1652.99,394.219,15814.5,8.82198264177401,29.7933347595088,2
141.615,360.008,486.301,299.561,13.0049,406.911,762.726,2365.95,2602.75,1771.55,1494.19,-24.9938692048489,-11.2097675135833,19
117.262,1441.07,824.219,267.502,-103.323,409.872,15.1651,2033.2,1432.01,69.9041,15827.4,7.8942484102343,26.1533091500486,14
216.843,319.988,191.818,1569.72,-54.1822,1531.86,888.707,441.622,477.733,4152.16,-919.063,1.46062587221132,-17.6431758509783,17
131.768,446.237,573.662,303.579,27.3187,304.512,-71.6712,1485.9,1027.83,-787.751,9823.78,-2.2310588371132,30.3282806075721,2
63.3208,296.169,576.54,689.377,45.8101,977.027,3463.17,1647.96,692.419,807.449,-645.257,0.0457033879705744,-41.0423541156668,21
-32.8635,532.943,252.997,314.992,-27.3297,274.656,1329.28,100.093,71.0193,1013.79,4133.99,-8.55178429508366,-15.019719671887,12
470.734,611.669,855.725,732.125,-1.41543,519.187,-125.205,1779.3,585.047,-332.047,4127.26,-14.7218554829467,14.5517035771358,25
295.282,1340.95,88.2595,680.578,-47.1256,569.416,124.422,430.09,-516.671,161.74,5488.18,-8.18982884093833,18.7070184758854,20
110.077,408.04,351.973,199.051,65.0691,604.602,1637.84,273.46,1172.26,257.557,-535.954,-14.4705686827075,-25.9811501612123,19
85.7998,307.648,167.623,732.663,-128.06,1067.2,575.232,1312.86,-245.231,737.596,1271.32,-30.8445216121126,-5.27144542958089,28
109.471,309.694,1228.91,68.9355,109.012,274.202,831.366,2006.88,1093.52,264.755,731.549,-35.1909661794639,-12.909220720375,19
107.346,993.034,719.21,113.437,-23.2388,-171.845,108.918,1024.3,519.904,9834.83,23219.3,16.7219079635573,-10.4527686391585,13
87.7859,522.558,539.73,24.7497,97.7671,543.692,677.605,1859.05,-803.497,752.706,22199.6,21.8260137096091,18.6595226549251,14
396.759,381.944,259.253,240.247,-40.9528,388.717,-2.14117,581.374,1227.01,-259.527,-118.913,-28.7110834268738,4.68978384829911,19
60.6607,438.495,294.269,394.613,-71.9389,417.27,2922.56,1939.03,1536.55,-951.952,1600,-7.20795738985998,-42.9097499145472,21
76.1019,267.307,575.987,-46.0457,-10.6883,460.188,2254.84,992.84,-242.97,1022.96,4440.29,-8.07330603855319,-34.9563731908412,21
37.7002,934.989,405.375,122.588,180.752,160.214,-250.561,1263.2,237.099,959.662,24470.2,31.0996227013914,24.1591591218284,14
138.496,492.219,121.493,110.678,130.805,536.574,164.558,450.038,1395.35,194.769,6933.46,-10.4991937698291,22.1004283091175,19
88.0888,828.861,429.52,67.2118,77.768,52.8789,792.268,1616.23,81.7494,1420.18,22259.5,21.684856297928,17.9894455105888,14
171.326,705.312,296.452,551.065,-84.9752,609.034,-57.4554,1578.04,651.179,-888.138,1178.16,-30.6841052385043,11.0894562382398,19
342.573,541.974,190.158,915.873,-119.214,406.842,1957.18,485.405,-143.596,346.461,9313.84,4.62568624810165,-13.3402244347569,6
32.3236,347.463,201.979,-44.4597,-42.8946,2010.22,1840.34,1070.66,1903.1,182.381,431.298,-16.7729449711294,-30.4244467029015,21
62.8895,330.069,305.78,293.256,-51.507,1194.93,1912.15,186.981,342.849,808.577,7259.79,-3.41087544886976,-25.6181400713238,6
231.341,424.671,277.21,246.914,-135.065,282.401,562.28,-1.1206,1414.62,875.272,13768,4.66307023243739,18.2030417128013,20
182.186,1798.45,355.356,17.6619,196.605,198.466,1630.96,3573.13,-259.051,2799.42,246.13,-11.8779215062165,-16.6843785402816,21
190.038,748.124,769.518,122.41,66.3681,740.839,-251.292,1847.1,878.623,246.009,20757.5,23.9162959442456,28.5244586760477,14
116.334,859.601,543.483,179.092,95.2626,56.2908,-204.497,1937.28,2255.01,325.437,22121.5,24.8693703189664,26.5538777913612,14
28.2958,194.028,262.447,13.0587,86.3514,720.51,419.469,1539.18,1008.23,-51.9164,659.917,-40.4434896399661,-5.01477800907494,19
40.5699,1730.3,-22.9193,164.273,-107.944,121.101,1935.65,281.25,22830.5,1105.5,26908.1,5.27094453141017,2.51147572943145,15
112.673,375.587,463.147,6.30735,-79.6415,485.695,144.301,2006.12,1568.3,490.312,1012.97,-41.2767357725325,1.17112697088374,19
235.092,1641.4,959.477,726.649,-54.8437,813.197,360.788,2480.16,125.387,437.076,12229.6,3.74341316381668,24.7959050248047,2
-42.6021,687.738,938.124,21.3879,202.295,387.033,508.862,2147.22,-752.528,883.894,15069.4,11.2040126161039,27.5335883492671,2
350.918,452.213,82.6069,454.422,101.523,18.2143,9560.1,437.57,1551.73,-42.3256,25865.1,28.9162714467063,-11.6586274921066,10
134.268,546.324,224.366,325.027,50.6786,327.805,-233.669,762.95,36.6547,1277.51,-776.632,-26.7745929902968,9.89626898200233,19
217.677,275.598,244.79,824.504,72.86,589.27,678.275,2174.68,-31.0354,259.22,120.834,-30.542162494373,-11.2663044783613,28
225.934,400.443,355.513,158.367,73.4029,1310.23,2591.65,2091.72,1594.2,-874.06,788.943,-10.1612772352986,-40.4602949441845,21
155.236,263.272,203.095,627.402,-46.2489,976.859,1808.71,1250.54,-600.845,143.076,6314.95,-6.0453787894379,-22.2796875629024,6
134.578,450.495,1274.31,589.188,-81.1744,375.193,-212.775,2407.06,88.8256,932.613,9282.87,-3.27304390866465,34.4492206692285,2
92.997,465.638,140.43,775.921,-25.9893,731.315,1599.03,1204.71,-663.611,-154.474,5490.9,-9.47848932793523,-22.2638908155743,6
-6.5416,1264.4,1119.58,164.833,97.3856,247.595,60.4248,1725.93,-351.888,1054.32,16804.1,14.0798033501604,26.8522517976652,14
159.509,348.326,266.304,96.7776,-4.88237,523.355,1815.4,852.877,1178.41,632.032,384.506,-14.4478144211238,-29.5812460099729,21
-6.08943,534.01,261.519,1374.91,-215.808,825.244,3306.83,1851.37,183.449,-592.204,205.818,-3.02074853917189,-42.1412655502455,21
92.1955,364.929,240.444,36.2915,-131.923,548.494,2446.91,1391.34,3383.06,-63.8196,708.636,-10.4688519531212,-36.4783157700395,21
106.987,334.361,223.303,-85.398,-28.9642,474.277,110.555,1203.12,891.887,398.001,-472.307,-38.857546985558,3.16947003341707,19
189.362,253.754,357.783,863.628,-83.2075,368.888,1083.75,1065.5,585.708,996.045,1082.44,-20.9825259042562,-19.944119595347,18
137.67,340.018,1510,138.139,23.4541,444.887,1849.32,2372.32,1224.92,-334.477,6720.31,-7.86265713956019,-21.8285032308665,6
90.6231,1611.28,728.256,10.1979,-134.29,447.939,1029.14,1615.2,929.338,698.494,22849.2,23.2824604229762,13.15177084682,14
209.572,409.005,266.096,36.0677,-156.164,579.476,589.186,375.914,497.811,766.918,18757.1,17.8597926019387,17.8319317320346,20
168.645,451.007,163.79,83.7849,214.124,208.202,2710.46,738.663,180.823,817.492,10514.2,9.33859668473439,-19.01818737402,10
154.523,329.71,549.366,223.032,72.5188,522.67,1473.42,1663.3,-368.646,712.03,-642.076,-18.6659564191106,-24.1712806827001,21
21.3669,1066.61,173.323,29.3286,-117.858,269.089,1271.04,74.1875,1591.24,64.2783,20957.9,22.2337640837396,7.68959412283446,20
92.6484,321.912,390.337,62.56,79.6586,208.938,497.485,693.895,1713.14,644.752,16421.5,10.7870187970935,21.6757936084659,14
132.982,1440.72,1047.5,94.653,15.0755,-1.29609,-283.031,1479.24,534.721,982.11,19951,20.0229253974692,26.7347592214434,14
91.0428,433.325,337.286,265.711,22.8968,437.148,357.992,2008.03,1724.35,1085.77,-1011.2,-41.5974358628169,2.64980261802055,19
11.6995,643.475,1084.94,267.775,86.3734,156.43,-30.3194,1848.65,816.74,1129.7,20359.6,22.2372131849812,27.8742074348125,14
130.708,321.038,529.251,207.685,81.5498,576.608,1539.26,2417.25,635.335,1222.86,-915.49,-19.1460105202537,-24.1020943874526,21
85.2409,486.939,244.096,108.869,-22.8134,348.858,1239.17,-260.356,923.329,842.734,2395.41,-11.5165639266167,-14.893285039553,19
149.582,521.02,247.676,131.448,-131.552,467.275,-150.732,274.497,1343.02,381.52,-367.043,-32.8074630266574,11.5111329197409,19
242.276,366.697,269.951,42.2257,-26.2823,546.489,1579.47,795.741,1793.61,214.729,251.388,-16.8483018445922,-25.9819508421169,21
168.52,610.09,235.702,151.348,-76.7776,216.975,699.422,173.457,914.822,-124.249,19347.9,19.732518547016,14.6209298968698,20
257.604,471.775,271.052,244.662,-51.5334,251.202,7542.88,-14.5038,-525.676,751.904,12953.8,18.9726430817496,-31.4495904280991,10
179.723,282.168,230.531,1599.5,43.6793,475.602,53.1539,1322.13,-623.652,-625.843,1012.03,-28.5433968174016,5.54406704720612,28
177.466,246.121,413.085,711.245,-70.3428,467.803,219.651,1061.92,-756.455,-324.222,28.0903,-27.4084786691575,5.09100756196666,28
130.804,474.604,167.695,74.1746,46.4827,426.437,-12.6057,192.933,348.015,1468.04,4602.06,-14.496092273087,17.6902927905017,7
141.727,426.907,376.809,139.692,145.477,542.769,-29.8579,1090.74,1056.38,2402.09,1064.03,-10.1666670066409,6.46616999604473,17
529.859,353.585,342.794,124.255,55.2141,647.721,2365.31,170.1,598.341,756.568,-658.396,-6.26280299177244,-32.072140637122,9
110.303,404.748,216.213,743.306,-136.599,455.292,4360.45,230.125,238.662,70.246,6472.92,9.1676348830924,-36.9858788366465,10
224.379,431.043,775.021,69.4414,95.7492,409.15,332.663,1932.69,-58.8144,734.197,6389.94,-7.19768191991839,28.1109650203803,2
432.702,198.143,94.0501,67.0623,180.661,328.134,4012.69,936.699,-782.774,806.012,2161.07,6.31850735508183,-38.2146320108086,10
72.9682,285.72,503.001,50.7577,145.816,706.719,2085.6,693.303,-540.598,820.833,-193.233,-8.87243082424459,-30.9854830988981,6
557.551,748.355,198.651,606.414,-36.0123,363.738,1805.81,319.993,1066,-272.353,21674,22.714709267368,4.13298971919669,20
511.973,535.672,426.582,637.664,-73.2171,470.646,3860.07,179.198,-64.1849,670.808,662.085,5.94646624780014,-37.5557802854209,9
184.082,300.183,575.61,590.016,16.2281,663.995,810.989,1671.05,-595.542,-294.396,5526.05,-9.16665019359315,9.46970293660995,28
49.4488,218.669,357.834,1300.56,58.0527,757.501,214.035,2034.59,-263.449,-1206.79,1364.89,-32.3448852253759,2.49177080631319,28
180.906,543.886,266.758,273.055,-22.2437,722.427,1039.31,101.268,610.992,787.281,2548.16,-13.7840610015827,-11.1680886359811,12
139.576,1057.05,471.84,166.98,-57.1386,342.602,-705.295,1598.06,3294.49,-391.967,24869,29.2747081929431,26.4389570758047,14
90.4098,282.869,399.723,181.301,-20.0127,413.074,4232.4,547.387,3353.37,995.907,-778.754,5.8399236383815,-39.0864571648728,11
75.2587,395.703,678.15,2.52991,-6.89722,236.312,-254.668,1207.92,1613.69,-639.872,12485.7,0.257558251984722,31.6050793639145,2
39.1098,382.06,395.467,256.337,61.1045,459.767,353.975,1686.1,767.549,5328.64,-171.658,6.94589567648902,-13.4144060455207,17
-2.56828,408.65,138.709,1075.82,-151.692,1290.39,2881.9,751.965,-543.876,-525.486,9771.87,8.84634130801328,-19.035776779535,10
131.008,405.415,461.688,620.557,-58.1684,614.581,-50.4009,2049.84,-24.0005,209.328,1593.61,-39.3824771097173,9.36630970907466,28
213.078,1581.6,175.546,654.401,-128.749,479.712,3918.88,297.793,211.126,350.034,22244.5,26.5088944768429,-2.82556445894198,10
179.528,434.562,1034.33,-28.0462,96.4943,427.654,326.783,1751.81,1179.92,-40.1748,25235.6,27.0664007936266,17.3617924554832,14
36.9764,747.798,1080.39,-7.32175,-42.7298,92.8786,840.813,1361.06,1143,236.354,23422.3,22.9716672822036,15.025944148787,1
99.8383,365.006,665.925,124.014,55.7772,201.163,-205.219,2060.33,906.158,129.346,22297.8,25.579445596478,26.3853519081965,14
1.72265,572.862,633.38,138.824,-71.1299,558.86,156.322,2384.13,9804.49,965.062,-196.52,-2.38813878503807,3.92835190286757,15
142.735,458.857,568.491,371.67,172.557,714.293,8.97599,1884.67,-359.56,797.468,1672.61,-39.1308655881778,4.76485422328526,19
172.151,809.275,680.556,302.492,127.841,407.284,326.244,661.929,1462.81,670.803,531.663,-15.0310024879894,6.45064007911836,19
194.859,551.627,1096.04,122.108,115.977,401.464,687.334,2133.76,387.63,1522.56,11665.4,2.86878388302021,25.9347052151496,2
-33.0419,1101.17,800.124,17.1419,-143.403,203.413,-256.872,1901.82,1489.81,742.126,14117.7,3.30972890521912,30.2885020035921,14
425.833,436.99,179.097,805.008,113.216,423.651,7182.99,812.338,-1219.58,211.484,-539.146,15.2035053346888,-38.3024508006257,11
152.729,548.004,488.889,207.319,-154.89,347.021,-146.552,1451.9,1058.14,-34.3739,10568,-2.97501856453773,31.4475808543953,2
56.9891,1410.19,642.812,108.99,-168.847,463.948,423.607,1019.43,1027.49,-327.704,22435.9,23.4002036009879,18.7541524674026,14
388.071,342.957,275.73,983.36,23.1671,547.68,214.104,48.6034,405.169,608.095,3095.25,-13.0901212035632,4.39287036726642,16
83.8917,247.974,514.327,-36.7837,51.5453,923.171,198.149,2647.85,68.8042,738.584,-37.8544,-44.610323379743,-0.858719903300397,19
115.468,360.857,123.918,89.0893,-32.7973,338.291,1082.28,161.313,1505.57,-365.874,4240.15,-12.8598828513485,-11.9220686489393,19
8.35398,289.461,118.533,168.974,-26.9566,784.895,1478.98,639.597,982.056,651.089,18456,17.3242560591989,6.26967943722843,20
466.49,320.274,253.161,32.761,235.494,376.157,1448.45,221.539,1238.13,582.387,1111.87,-13.5477862869965,-20.6221306118805,25
115.641,540.003,184.754,1109.4,-55.1018,904.18,3357.84,1823.96,877.001,1086.03,-223.256,-1.04678604446443,-40.268491861944,21
122.316,566.763,314.619,8.13479,-79.9985,357.505,204.493,1388.92,1200.38,313.223,27904.8,29.8856704181442,15.1489221426852,1
598.201,403.076,230.185,243.835,124.758,1979.8,1775.96,547.901,1402.96,-89.8324,343.766,-13.5103220118337,-25.4050870710305,25
187.998,441.895,238.939,-23.272,-61.5783,731.285,2444.18,268.108,1072.25,821.276,1456.9,-7.22961638576569,-37.5442186418906,6
147.129,291.119,221.015,543.62,170.876,220.168,583.502,277.524,-492.17,1055.35,16214.6,14.3577268279983,18.6397405975775,20
-12.3207,445.757,176.771,19.099,30.8053,528.62,-78.0354,654.066,1029.48,546.31,58.1343,-26.3903067893385,11.1578986919606,19
106.478,1202.39,519.274,56.8055,184.827,462.669,727.232,1615.23,1586.95,-204.108,26677.4,27.9371286306663,14.7214883247737,1
403.861,449.858,88.3167,354.806,5.93115,917.146,2566.56,31.483,935.214,81.7244,4609.21,-4.67350176471663,-37.6455108840675,10
58.7718,689.176,378.542,-120.433,61.2493,365.207,-61.7655,1739.12,-86.7355,1264.5,14684,6.70840710849779,30.0253486709671,14
564.228,482.608,282.966,268.758,77.9265,176.719,1088.01,1124.98,859.406,3344.82,2569.69,-8.45609136126923,-13.1271058764388,17
162.15,396.489,293.756,872.652,-236.166,1037.79,2644.83,368.63,906.617,1289.14,1226.24,-4.99987745755911,-38.2889187323617,6
174.215,292.828,236.967,114.668,36.8882,1101.88,1793.39,1766.72,80.0933,960.573,619.466,-16.1338357799879,-28.5786313972603,21
94.4936,380.604,250.914,74.6072,-166.076,1236.83,3552.39,840.555,1446.26,747.048,2010.01,1.52734448700521,-40.890670505704,21
290.824,397.957,197.471,298.025,60.8085,209.662,3754.61,152.326,115.694,1064.32,5891.46,6.93722570075554,-35.3405768635878,10
96.5974,1586.45,590.62,30.8973,-44.0855,405.826,-42.1157,1744.92,54.6442,783.565,18935.5,16.9575281719439,24.5532747569763,14
517.794,277.674,166.19,590.938,99.9819,678.927,3594.07,1234.97,-227.777,-704.449,-56.5237,2.19309396214299,-39.5135447285581,21
152.93,390.547,376.379,610.524,44.4156,470.741,1312.17,1048.84,393.615,-35.1031,3469.63,-18.4311086300575,-23.8353808886649,6
67.4473,583.05,509.871,-36.9997,82.7682,40.7188,877.411,1764.19,970.481,956.059,15098.3,8.70356675614455,22.0793948457991,2
100.66,312.496,608.268,-15.635,57.0508,565.328,479.242,594.589,1225.5,576.348,-312.061,-22.2777967984849,0.525613847012643,19
133.084,285.487,1089.62,313.926,41.7418,443.758,485.389,2289.4,-235.56,1391.94,14602.7,7.55306422671546,30.5222112984581,2
95.2547,807.241,1004.97,285.157,-154.568,336.542,311.833,1672.15,1817.29,47.2494,20244.1,19.5678869799482,23.9995351048847,14
174.989,624.786,212.935,633.887,-44.2049,1047.74,2684.97,779.673,1317.75,-399.001,18307.1,20.9040240234706,1.75808797450984,20
284.356,382.528,155.042,573.179,296.459,-41.238,309.514,532.047,374.852,18704.3,1597.27,13.3354371023188,-19.1017432060161,5
116.726,466.507,364.898,162.963,-71.6923,431.349,559.366,-177.796,3002.45,-340.922,8304.33,-6.05939624186079,16.3642145423098,20
13.7612,471.049,939.367,138.318,171.815,317.742,217.911,1502.84,-848.718,1001.6,23050.8,25.5787442656706,20.8079196363967,14
142.073,391.512,511.574,878.994,25.5177,291.593,2331.88,1541.75,655.178,80.9816,7715.51,-4.01170584843461,-28.3090408881095,6
125.038,439.617,342.152,-43.5977,-146.031,488.236,575.983,1845.12,3600.18,579.831,405.324,-15.4326780658845,-0.650267957516264,15
58.5898,413.806,807.934,288.988,38.5047,392.841,2524.15,1879.75,900.92,-331.486,6176.78,-7.80367183060814,-37.7204347404379,21
81.3159,309.46,650.495,163.62,39.4319,565.818,802.432,1526.9,1300.55,-25.5919,18998.5,15.6811140154872,19.6979379656312,14
143.913,569.691,497.495,238.864,-24.7464,302.629,847.974,1262.49,1330.16,1002.37,3026.51,-27.5244752554474,-8.51716053508004,19
66.4842,1008.83,1047.86,540.621,29.146,319.783,129.804,1821.05,675.152,709.404,23564.4,26.7875703188041,21.8311029020678,14
377.209,260.315,39.5272,196.947,16.2762,594.35,1659.2,375.514,1582.04,-102.091,-28.7692,-15.1832412094905,-25.3847966924386,19
121.276,492.731,601.632,249.336,8.99035,570.732,2114.17,2102.67,2759.95,73.2563,1733.86,-13.9531234876379,-35.0473092629083,21
34.8016,1841.11,239.874,727.32,0.606369,341.242,1419,524.989,-962.64,342.451,18404.9,19.8577372846829,8.57881878018357,20
122.232,436.733,891.683,186.29,-67.007,608.477,558.614,1519.43,938.516,507.223,15676.9,9.88150420087356,26.7424725637495,2
93.875,125.917,817.095,854.292,31.4208,535.778,54.408,2360.02,913.385,855.178,2814.85,-29.2237902627844,11.7431215199889,28
87.9685,549.507,349.136,100.582,40.4616,660.407,-1.08686,1277.14,1137.92,177.587,607.336,-34.3850011800974,8.40062739145729,19
69.0038,689.601,405.369,-3.56311,-50.3555,418.799,2215.54,901.881,1223.85,303.176,5954.41,-10.6904617511355,-39.5442993154107,6
94.8655,385.488,564.827,125.806,22.163,579.027,729.713,1545.61,1185.55,526.047,2664.84,-34.8501534726731,-7.52907475340508,19
184.76,350.414,195.415,244.784,-136.131,676.496,-104.131,1044.81,1116.42,163.56,1643.57,-37.2745905947519,11.6819908172209,19
259.458,294.211,306.362,66.3423,64.4523,345.953,643.858,152.768,1175.19,849.971,1714.25,-15.6860072545007,-0.750615683183055,19
118.159,764.005,200.174,155.472,-119.652,676.098,2859.75,441.006,420.884,932.118,2004.4,-3.37982311768292,-39.9841085332687,6
700.633,784.324,206.76,25516.1,-481.965,1051.02,3482.76,506.095,1753.39,8422.6,809.504,6.68255605036871,-23.9595416464454,24
89.7312,1117.5,901.209,164.05,71.6153,340.096,-95.2096,1173.04,1157.39,133.895,20513.1,22.3206000185869,26.6781944974269,14
9.47451,345.31,157.619,127.55,-97.7164,424.571,194.326,1380.51,412.873,946.053,-113.421,-39.7713918560614,2.29203685337943,19
95.6443,775.233,158.619,625.771,27.2188,414.981,1268.94,333.904,615.385,203.012,4071.7,-14.2984874507821,-16.1688679440435,6
201.613,441.627,280.477,343.184,-17.1405,488.566,1598.18,382.567,1136.92,-127.533,523.405,-15.7863892573037,-26.6661330579949,19
83.5667,407.18,149.164,226.422,-7.17069,283.824,64.9149,693.572,247.385,715.743,707.529,-24.7874406641939,11.5647675006255,7
163.404,534.856,893.195,88.4293,146.784,550.112,-186.13,2205.85,956.943,524.878,14412.6,6.17051709248367,33.445901891394,14
302.677,322.708,337.189,208.506,-46.7517,427.539,183.262,1102.92,547.824,716.788,398.595,-35.3730712001914,2.60101253847524,19
128.366,7594.35,755.979,19.4136,79.0585,464.938,369.428,1218.3,2220.01,288.736,14732,1.24867060104687,12.4993426894705,27
79.08,266.239,683.05,145.296,4.84189,551.486,3803.03,1823.26,1098.51,124.992,1805.85,2.5536485467941,-42.9060224897786,21
76.4631,406.078,347.333,194.815,91.919,1160.77,778.451,1366.93,260.146,767.978,20.0692,-29.420780987309,-11.513825505824,21
51.5762,566.793,1128.86,-73.8803,62.9701,659.707,349.75,1874.86,1424.3,198.098,19994.1,19.7390119860183,23.6712470314777,14
217.122,417.349,365.601,81.4681,-17.9956,562.173,244.137,753.607,5487.27,214.258,741.114,-4.60508867236769,4.55040027667487,15
164.955,307.707,238.205,650.381,-28.8882,419.166,957.14,904.112,-302.221,138.847,726.222,-21.9921879266931,-17.643733879179,18
113.861,1852.67,534.319,59.1782,-2.81229,340.882,26.208,2040.19,6924.57,546.864,17379,3.76606819410498,12.7684859383693,15
206.821,265.491,272.572,622.144,-22.6164,442.744,2624.8,1420.44,507.41,57.1323,1386.63,-8.2617783573315,-39.3369466629381,21
129.951,1069.61,636.685,99.6717,11.5445,199.612,-210.352,1511.57,-36.5746,1337.94,22545.7,26.7957541790571,26.1214581477752,14
478.973,499.037,430.404,987.402,-46.6597,390.281,371.415,1693.66,258.385,-651.447,1125.55,-14.9158682453845,-3.66709620509988,25
317.388,748.625,261.494,1073.39,-19.8606,312.435,443.262,2062.28,14.2912,56.6247,539.904,-31.8743530116572,-4.07617005564582,25
254.896,367.092,619.169,127.107,211.505,504.117,342.753,2712.28,-218.401,882.575,3202.32,-24.6024132850311,9.24099853265772,19
238.424,373.499,438.674,92.1606,136.272,611.348,4691.82,1190.71,932.085,428.99,-521.149,8.94100449339361,-40.1700382813075,11
159.752,593.474,554.891,93.3026,-33.3079,595.517,221.206,1533.66,1403.81,226.193,900.882,-34.5856537660832,2.44314534484284,19
137.076,430.777,270.938,-90.6726,-59.8541,871.914,2048.34,196.944,1114.15,740.028,4071.81,-10.1034643611707,-34.7597252380181,6
95.8168,346.611,164.446,141.519,-34.9752,577.185,808.795,464.675,1298.78,1158.04,3296.61,-19.3920881598546,-3.20283438786427,19
30.825,411.185,527.202,156.709,-123.546,251.501,284.235,1527.85,1105.15,548.175,21971.4,21.7998139161996,21.8221315717625,14
82.1683,272.051,532.186,-5.95462,14.6026,390.446,419.541,846.167,323.628,790.192,814.65,-23.7986321103676,2.10475562277797,19
78.7116,498.985,368.945,264.796,-84.7639,431.211,563.117,706.529,949.135,1130.47,-956.131,-23.5655204318826,-2.69432906030328,19
232.266,1707.26,1020.35,-174.679,211.846,280.275,565.097,1425.38,764.439,861.14,19342.1,14.407277347047,21.4702105848899,14
35.9873,491.16,763.932,-25.9141,108.191,140.104,289.389,1998.73,593.142,900.598,24446.5,26.6819115427385,19.5534845931479,14
128.204,341.921,357.587,24.6532,-158.141,523.516,2599.18,1284.2,1613.03,470.869,458.42,-8.84490620381378,-40.7801700147594,21
172.462,655.251,608.37,586.122,-1.25691,535.324,698.257,2670.08,943.228,161.677,972.089,-37.2372373972107,-9.16496772961913,28
711.421,694.927,272.165,557.726,33.0648,631.57,4469.36,646.801,-39.1912,785.472,761.176,8.88282963660235,-37.1984204062136,9
117.498,432.5,229.981,559.983,-64.5499,610.605,-73.5205,875.636,-1789.09,-1293.58,1342.69,-19.0617490920533,14.3947278029153,28
353.788,1134.77,147.967,836.982,83.3696,331.369,46.3802,432.22,-169.381,1054.27,3678.58,-12.6311857955256,15.1315163770201,4
318.206,925.12,136.92,101.022,65.7672,471.863,385.116,279.782,1418.49,-192.534,7430.95,-5.94767194416697,17.5444998478395,19
34.7086,281.455,158.913,588.995,48.9552,524.844,1399.48,681.213,-898.974,-170.423,3557.43,-12.8017352069569,-21.6389956588651,6
135.244,331.253,273.849,28.7482,48.8295,772.377,493.111,759.879,1203.46,-136.339,717.032,-24.3116180243752,-0.348501692981216,19
143.244,643.776,732.976,185.913,196.422,321.877,501.423,2061.31,1141.76,-198.393,19784.5,19.6522094510539,22.627063718603,14
129.745,597.794,214.676,1151.75,-39.5833,296.756,2426.42,88.884,481.614,963.121,29215.9,27.4967921306252,1.06724742558022,26
166.68,700.51,633.894,21.7694,-10.2025,979.591,-3.58702,2005.61,3289.88,3524.04,27318.1,28.9609631655051,19.9544198644558,13
67.9596,197.267,474.236,159.442,152.709,459.133,61.7601,1972.75,-564.861,1077.46,6527.69,-8.02037505183022,27.9675792089591,2
98.0679,861.581,793.435,-110.229,96.6093,273.988,-233.853,1881.51,892.714,139.536,22841.9,28.0002028601868,25.8768573208805,14
152.261,701.692,281.376,67.209,106.137,590.124,-38.793,2263.45,1222.48,439.005,-605.818,-36.6999436841228,2.24802836817465,19
44.9118,2088.14,800.597,142.61,-2.14984,791.022,739.643,2754.22,1120.63,228.411,20114.1,15.8780915600678,18.7004345652689,14
145.257,1058.34,158.057,30.4966,222.105,-42.8566,3252.94,160.167,1429.13,60.8791,54504.5,34.519425512456,-2.76974103550408,26
1621.2,4296.51,209.498,-43.1646,174.348,447.048,2116.82,290.715,-883.047,700.081,10384.1,11.2374678158038,2.06791242060924,25
142.452,292.622,189.697,90.9369,-67.5254,367.023,2216.68,84.5685,2004.03,146.466,41858.2,32.9457626606005,1.36823709270986,26
62.4048,324.765,276.836,64.049,107.649,119.596,3652.99,529.04,-366.93,820.272,31873,27.3293503494141,-3.03533847311097,10
111.137,428.313,555.17,-21.5479,21.0807,389.504,-868.581,1898.69,971.047,-440.388,26602.4,32.0695154603178,25.3178301968532,1
92.4309,452.616,214.28,362.519,47.9039,1020.43,1468.84,258.029,-773.634,791.556,2786.36,-11.2039290696135,-22.8378355335717,12
196.203,478.702,248.145,27.6048,-52.3258,333.908,1873.29,-136.864,892.053,-461.22,29224.3,28.978697700927,1.4856089094679,26
21.2019,314.16,196.025,109.289,-5.38143,508.856,1405.43,1884.06,-809.663,1029.57,289.73,-21.5731532182743,-24.5104056644889,21
191.251,390.751,405.028,96.5331,454.322,691.049,798.189,543.04,1228.28,864.415,1603.31,-23.6128994716329,-11.0781238954848,19
136.409,739.641,732.443,45.1624,22.6831,240.475,-614.004,2128.49,702.658,1539.68,18629.1,17.4659475196999,32.3482661565631,14
101.807,381.724,119.229,145.974,11.0086,1786.23,2239.34,521.225,1181.96,849.366,2524.16,-9.67306419670053,-36.3931812811289,6
145.706,379.986,322.027,174.349,-70.7702,1028.17,1196.47,505.7,482.738,1125.89,9344.66,7.32340603742732,6.59532430666518,6
66.5138,631.342,969.321,250.709,-54.4948,345.29,540.382,2096.26,848.14,865.082,13698.1,5.58824491733217,28.4158119442094,2
100.002,2048.8,120.973,1520.12,65.9898,136.992,2713.01,290.093,1128.18,277.623,24965.6,25.5095805545938,0.453314917709683,10
87.2474,526.355,816.532,180.951,-38.1392,484.646,239.967,2157.39,438.285,1156.16,22312.5,23.0122991934932,22.5014174880774,14
117.492,416.028,363.167,151.82,-109.067,775.963,-5.89863,914.567,411.693,1276.77,363.749,-37.5240325563142,8.43184467783563,19
103.747,281.605,444.797,90.8013,-88.5177,219.422,335.939,1473.9,408.492,13296.5,-133.165,13.7882701567295,-17.3471527381153,5
414.421,262.767,205.644,650.203,108.917,1150.24,2541.38,1002.82,-789.299,-305.695,610.066,-7.03288011786102,-34.7074936937866,21
493.88,5079.32,808.073,338.521,13.8172,1031.7,224.029,1597.5,3446.95,523,16382.5,-1.42850592841068,16.7938779249841,27
243.961,942.069,244.761,214.94,-104.108,903.634,526.204,412.258,1255.91,-406.06,5110.91,-8.76451854201091,15.1356309673686,19
51.7149,577.233,171.889,778.748,-49.889,733.892,443.034,155.168,98.2443,-88.6809,419.951,-21.0933404037706,5.67265409702795,16
62.7802,332.299,399.081,52.167,238.33,362.16,1419.05,342.346,24.5414,705.022,758.729,-13.5776687392007,-21.0659590678523,12
187.905,597.228,253.656,565.867,5.82195,601.895,1302.6,42.107,-979.154,-1014.38,1357.98,-13.0117676539982,-18.1597916887288,18
60.0729,7574.45,573.066,342.942,63.1358,891.981,-344.471,2566.42,917.883,79.1801,3878.75,2.2424438511908,12.7091936314074,27
-13.7699,396.349,626.917,568.766,-43.1045,354.855,6.09218,1877.83,1388.49,176.391,9039.78,-4.25721596736909,32.9439643565476,2
78.1396,320.581,204.663,295.775,13.7111,610.43,675.981,356.552,205.028,706.092,5203.55,-11.0804801015958,13.6027236368455,7
38.3636,308.172,177.068,152.159,-127.983,378.79,799.031,512.076,512.238,702.743,1602.67,-21.7432623495763,-6.09589052742651,7
47.1638,625.236,433.323,194.506,12.2109,859.893,905.086,1267.43,511.595,715.624,15359.9,11.6607182260571,20.4242677547508,2
5.10559,1496.66,1175,1157.48,-202.249,565.303,22.61,1005.42,435.826,-20.562,6044.02,-8.47580280064992,25.770422205687,2
43.1697,1601.21,1227.45,200.626,7.31346,67.9628,229.229,1786.4,1040.07,355.578,27945.4,31.1894927484057,14.1084640205916,1
1312.57,534.812,241.721,1387.31,-44.6787,178.676,4270.2,-315.711,997.587,501.939,41917.9,31.7514824654584,-4.65597480611356,10
153.886,505.543,198.767,242.308,-69.3913,428.302,2258.54,42.674,988.849,686.459,1806.58,-8.74743106764119,-36.0929920912682,6
-24.6159,753.412,699.955,441.594,-76.8444,168.006,132.87,1136.46,1238.03,926.202,23440.8,27.1727157160512,19.2302816204355,14
128.606,400.042,451.726,15.8292,-95.501,533.024,-235.874,1962.74,405.643,847.306,466.129,-41.2936511027682,7.58393336643856,19
25.0259,498.576,205.757,930.871,-108.486,660.414,162.647,841.886,90.3365,48.8976,1054.39,-32.4427663544426,11.3262394561187,16
85.7477,558.866,944.874,150.127,64.2292,423.837,465.636,1182.6,1062.64,717.766,17559,15.090569154439,25.1734994359387,14
101.907,707.5,139.942,119.203,146.992,487.459,1820.39,-95.0587,1070.54,665.646,6860.8,-5.65585664878521,-26.7315862307687,6
758.351,336.513,225.322,433.792,1.09606,1913.09,7261.18,783.448,1106.14,548.517,1893.47,15.2375391638615,-38.1678467466216,11
61.4154,1229.06,1762.19,379.018,13.6155,484.421,189.28,2374.84,41.0843,1032.55,11714.1,2.95585765647625,28.2630686853601,2
198.207,397.421,396.893,645.442,153.284,1184.24,1370,1970.77,-306.965,286.093,7373.81,-3.95485573756923,-2.25180385348731,2
115.635,513.291,262.593,224.864,-4.37316,660.093,1925.87,160.938,1329.17,409.767,-717.356,-12.6128679548535,-30.0743641038265,19
622.478,368.589,127.408,0.105709,60.1788,513.547,2049.18,471.244,2688.2,542.061,2681.35,-10.7834801157766,-29.9240377756955,25
175.048,618.747,422.563,259.774,-126.509,2796.06,-374.405,1410.56,2338.46,1054.35,13125.1,0.521620513099806,31.9343265719478,2
65.1114,318.481,217.144,171.799,9.70238,640.845,-213.543,268.054,439.097,765.207,294.066,-22.4484585784319,12.0146075903764,7
84.4404,202.701,295.173,213.991,6.56449,487.313,310.506,645.815,1289.74,270.975,2141.34,-22.8296320906917,8.37483861340238,19
260.957,448.517,188.76,145.998,152.933,448.908,1621.15,593.683,-888.479,784.033,7883.08,4.34791201133691,-8.13630761177402,6
142.179,277.321,368.354,251.181,181.734,540.414,717.057,2432.87,371.978,999.899,20.3304,-35.6190264016636,-12.9756393101474,19
166.804,2018.58,164.964,89.6529,-22.3679,395.144,1908.77,107.05,2390.58,157.659,15785.7,14.9917984101101,4.4895162166496,26
31.659,168.335,543.006,-12.3889,173.939,634.916,687.873,1649.36,-116.942,866.405,2987.21,-28.6307425483124,-6.6746202072688,19
76.6106,717.999,686.161,82.0989,26.2177,366.22,230.755,1645.94,1256.41,416.863,23761.6,26.0796339769247,20.7180252517098,14
16.2846,1216.56,74.464,223.283,-62.8173,271.236,-72.3817,41.561,691.841,984.698,29248.5,33.8157530011321,14.8607493157948,26
45.1703,303.142,678.686,80.596,-111.139,393.822,-155.523,1085.01,1022.72,-596.079,23293.3,26.0540762925278,23.5459113281833,14
-41.7138,795.304,336.524,119.857,67.0707,491.243,-408.529,918.844,1171.92,-22.7761,20086.4,21.84735923007,29.8186282151543,14
186.021,268.986,246.784,96.7203,-6.2848,478.492,379.442,657.074,1827.67,246.283,2875.29,-19.1487359711886,8.31873109613794,19
117.457,368.304,124.689,594.055,29.7927,444.24,454.103,594.489,34.569,-346.498,1187.62,-25.8027973907733,0.269879463733889,16
82.2435,620.262,118.857,53.8052,-18.3086,507.78,91.0502,310.925,1230.46,-36.3785,14891,5.49498219582525,25.2192126219515,20
113.229,1119.21,113.419,258.526,31.4102,497.389,201.572,306.794,1268.42,-39.025,21476.9,22.7356738623544,22.0065502741736,20
228.068,378.583,353.658,142.082,136.888,449.615,302.208,1398.11,1356.36,-0.520565,209.079,-38.7811178985961,-2.39074499826954,19
209.644,604.346,171.103,84.1317,6.03085,274.039,2081.15,325.271,922.201,315.923,23926.2,24.8201582599167,2.047486061828,26
186.586,819.37,460.467,251.912,-115.072,789.423,-182.316,2029.85,1018.75,1225.29,367.089,-35.9484725431554,7.60638477521363,19
139.021,482.736,713.21,-0.550822,123.519,317.283,-440.802,1527.66,1039.93,223.767,16097.6,9.75339349455859,33.4910379797299,14
128.542,397.142,108.184,361.815,32.3025,511.505,-342.053,560.158,1052.57,94.4553,1326.39,-32.8892974742246,14.7392827257423,19
-48.6892,1739.11,778.386,10.0127,-113.114,389.168,1074.69,1365.96,986.722,-532.256,21046.5,20.1057554768239,12.1704274630425,14
78.3818,909.208,398.431,-13.9738,55.0788,306.771,75.2487,1298.78,185.565,722.464,-74.6505,-27.6862112468416,10.0112139673967,19
34.0561,180.692,311.294,115.551,6.0589,480.377,-38.6752,1648.08,-387.801,1201.8,4298.77,-20.4771898239075,21.9198942955356,19
12.4757,784.095,551.123,-71.8985,14.6377,644.937,219.087,2275.72,1071.12,-953.508,20825.6,21.6665296717739,22.5441910852744,14
399.056,1228.27,323.844,556.809,176.311,2458.73,6336.75,775.913,922.713,873.574,19916.5,27.278726997393,-9.52553840002872,10
44.249,322.423,324.24,27.6683,25.0961,256.681,4161.73,911.051,644.254,1209.2,477.942,6.45602675968748,-39.8438295030488,21
-7.45972,294.431,166.487,73.978,153.093,649.589,2196.56,575.066,1630.72,507.392,3409.26,-10.4664579852274,-37.1377938476178,6
83.924,399.577,608.688,491.775,93.3462,450.344,205.889,885.428,81.5669,771.689,-37.0052,-26.7987925325326,5.16655104430059,19
107.224,449.227,239.256,13258.6,-2.08771,843.178,-98.7286,-27.0284,1946.28,22760,-1451.14,9.24543722486542,-26.5968853557656,24
29.9063,297.189,135.182,782.629,-6.57161,1824.87,1796.33,909.563,1490.71,519.552,1901.57,-15.4381403740172,-31.547777682378,21
322.59,766.219,200.087,170.405,-25.2552,507.766,3375.22,555.69,-303.394,1417.68,6304.74,4.25205179917955,-36.1535834193208,10
492.367,977.821,289.593,150.473,59.4322,563.04,3579.11,30.1617,1231.13,-748.338,3452.58,3.38619494451032,-38.5671482112879,10
30.9113,239.824,525.691,147.464,150.01,360.538,-120.483,1701.03,-136.871,936.688,5870.88,-11.3243799291071,27.3039868978688,2
103.713,373.306,309.822,297.439,-0.934661,841.008,714.745,571.576,2079.48,39.2276,564.348,-20.9124287401038,-4.34819064013423,19
244.809,496.576,264.211,772.866,314.609,1108.69,1386.67,965.859,-490.766,832.862,152.383,-15.5305604182403,-23.9662176590092,18
403.332,507.183,284.526,444.273,-131.476,549.589,5203.14,211.341,1165.01,-119.8,4773.07,12.3710080447363,-36.7128697038795,10
498.507,606.099,304.997,792.508,65.6184,630.583,351.873,679.244,513.13,-78.4362,2779.77,-10.4266446881759,0.0122853925055378,25
171.28,2411.19,626.217,177.125,-36.5211,525.55,1704.46,318.112,965.326,39.932,11704.8,11.5535329665569,5.78287450318857,20
139.071,1735.5,533.901,69.399,63.6417,342.823,692.695,1506.66,880.015,-251.723,25875.2,27.7481567815257,13.8371224074307,14
189.861,1535.93,417.002,181.341,-40.6826,710.5,893.716,1069.62,2058.43,-22.8156,1513.55,-8.5376918010198,-2.00349987717075,28
189.548,494.129,245.633,642.717,-2.00159,707.876,1055.68,703.173,-1059.77,-432.054,3667.03,-10.854789614003,-10.5385309301963,18
154.814,302.568,385.329,31.8624,-32.2982,466.904,1521.21,871.997,953.17,-169.489,-58.7052,-18.1352218313049,-25.1186038466491,21
4.34115,640.783,1093.6,-3.82444,62.4913,411.219,243.97,1774.69,886.64,606.344,679.536,-34.0447078669312,1.60503505776117,19
84.7967,268.603,2671.29,104.325,11.8216,351.919,301.584,3707.42,-29.2329,856.612,16910.7,12.4508866637738,29.7031666293294,14
728.297,538.947,338.881,372.578,-20.8503,671.948,407.523,973.936,1216.34,253.274,2336.92,-7.75266008331932,-4.67100922203171,25
179.067,349.997,144.619,245.836,107.951,1901.65,1870.45,1220.12,-399.18,779.062,10.2863,-13.1418731901149,-29.14057466965,21
220.571,685.553,408.865,362.132,-34.3877,302.926,2054.98,700.328,710.434,4567.65,2604.82,-1.61300352352759,-28.2007900451545,17
63.4263,544.876,505.215,-5.67201,-13.5015,406.211,603.394,1201.83,679.18,907.669,22112.2,21.539351480775,18.4226732377002,14
133.146,776.647,278.718,149.512,-7.31671,355.812,35.374,1864.6,1107.95,257.064,2138.18,-29.2076745347525,10.2384366683799,19
74.7453,647.61,626.937,729.99,86.4545,316.477,286.331,1872.32,213.991,383.358,17287.7,15.5946770187028,28.1085160507645,14
117.658,465.701,339.035,13.5101,28.5263,452.717,263.838,1852.92,-14.4194,866.639,-21.8017,-41.2504573105803,-2.70984239533481,19
149.9,552.076,391.823,144.264,-82.9887,993.857,2540.99,1267.85,637.154,733.473,-309.914,-8.46997228352195,-38.9298169971888,21
232.161,409.525,308.922,681.434,131.781,584.21,575.695,1711.14,-1279.86,-101.594,560.594,-26.0579598001213,-9.93708165690188,28
162.932,447.305,103.569,2267.51,38.7706,418.173,2506.21,270.119,-281.18,414.355,16606.4,21.1029275205432,-0.247261131943396,20
119.236,340.681,390.691,170.177,86.9975,412.681,131.91,1485.52,-718.997,1077.83,10683.2,-0.187096506872119,30.0998462780256,2
200.191,431.383,161.385,125.36,190.813,417.976,253.867,1323.07,1292.2,-152.075,2271.32,-35.3503466163161,1.14502023772056,19
96.4929,419.486,624.923,44.3221,-15.265,317.785,196.394,1358.05,932.036,49.0001,24566.7,26.6355023882864,19.3079705771749,14
81.5007,576.567,308.726,171.662,71.7411,1801.05,4284.28,746.243,799.218,1117.64,13383,21.0773449500143,-15.8490907029569,10
162.919,203.802,487.385,871.814,-222.247,809.9,765.549,1438.91,496.5,379.927,1592.14,-28.3499889239538,-11.8589584151667,28
43.6589,277.803,525.157,779.03,-99.0639,659.523,65.8859,1943.64,755.432,-1000.88,566.85,-38.0958578081912,4.62585210273149,28
128.191,403.393,170.048,1114.78,-3.37634,848.681,473.205,409.645,-646.687,-65.4329,3766.43,-14.1813819089829,13.4912460180903,16
97.0373,432.176,2816.76,-8.64719,84.0061,179.023,-259.023,1666.48,260.024,982.661,22341.6,25.2379297541001,26.0980181682982,14
180.563,350.018,309.83,155.632,100.126,528.733,1436.45,244.975,904.158,431.391,7861.25,-1.14875832872236,-11.3665408693336,6
-38.2567,591.519,559.985,-121.001,-68.5011,314.625,113.843,919.567,1039.61,152.08,5579.4,-12.5474872544032,25.019755025474,19
6.07307,216.56,284.547,269.97,28.1418,319.291,1389.78,2840.51,-1393.02,837.279,5761.71,-6.98866405570046,-0.151709873648335,28
8.7842,295.627,493.004,-44.5299,-6.26012,175.773,674.689,1810,6971.21,1341.42,18811.5,9.97907551490306,13.5740260848935,15
203.427,413.769,395.945,1153.16,-131.825,669.59,972.735,1133.71,-341.038,-550.323,3150.85,-18.0063099693591,-15.2254352245678,18
95.9805,156.705,510.459,5.57823,61.4394,295.872,329.771,2087.16,4018.28,-256.924,16118.1,7.84626250697914,22.989866046572,15
247.546,285.045,289.305,175.599,16.4874,670.451,97.536,1782.88,709.967,949.483,627.384,-40.0653040999168,0.910607723323959,19
164.959,692.951,191.546,137.128,29.1474,548.813,653.025,1870.23,247.901,1313.53,-676.885,-31.2947681387718,-8.70331818023523,21
78.6743,426.174,448.903,854.663,-80.2654,512.423,505.103,1479.04,-0.410758,525.939,1634.56,-37.4221874926904,-3.88672190836765,28
182.856,523.219,591.89,416.761,-9.15938,569.212,2344.55,236.146,1524.97,-356.194,1723.69,-9.36625595085548,-38.4812108094942,6
58.9967,442.721,949.023,211.883,27.9798,279.612,-262.163,1801.62,1267.56,237.452,19178.4,19.8282520480214,31.6146158266957,14
132.652,422.476,208.105,1907.47,-162.55,829.958,898.03,622.676,2317.65,-496.586,4531.56,-12.736548098185,-1.27143613684904,18
196.583,485.888,199.522,128.387,11.9019,837.236,401.613,152.497,409.506,781.283,816.784,-17.1617773552264,6.70256468998466,7
90.0467,339.587,470.518,175.757,162.498,377.477,348.827,1414.65,4267.78,-869.553,659.749,-7.27396438809212,6.0318507248382,15
52.0793,385.838,201.369,445.89,-19.3001,719.738,1065.64,235.953,-524.591,6544.31,3554.25,6.87925878893014,-17.5243054145983,17
761.43,337.893,259.12,69.7462,-66.883,1587.61,141.602,-187.356,923.239,-545.797,956.073,-6.92067605487289,-4.48815207511835,25
87.3444,389.275,197.472,1407.58,-2.8501,539.254,3911.13,671.89,279.988,880.616,-148.398,5.93268533625609,-37.9793248030533,21
125.897,1343.37,902.699,72.7885,45.378,192.959,593.262,1255.3,1168.26,1006.53,18849.8,15.1980357497166,21.5647730739821,14
13.6115,999.507,491.288,306.446,5.07116,384.462,-73.7077,1637.75,1592.23,-357.352,12150.3,1.06017491963256,27.2709953763936,14
194.616,484.442,652.527,6.79676,-119.708,439.863,666.768,1208.63,1227.8,639.996,550.224,-33.9127738388676,-8.50704595517196,19
359.601,696.947,142.565,187.291,14.0353,480.01,4280.7,821.878,108.326,1346.14,656.825,7.46838545744618,-39.4325789013756,11
56.3999,500.509,776.223,155.306,23.4247,39.3294,776.23,1422.75,1056.25,-289.944,26047.2,26.0232145736587,14.3826121337066,1
71.4394,352.574,178.369,-39.2269,18.882,386.959,850.062,751.472,-626.231,804.917,139.203,-20.5459227274285,-10.3300983743687,7
79.1174,364.86,309.496,-71.1943,692.214,1079.75,927.501,257.701,225.649,1527.6,3360.92,-23.881041484838,-16.1143907990697,19
120.99,232.919,152.212,144.788,-79.2227,590.248,622.863,1060.21,732.623,704.633,5101.75,-16.1206053155417,13.5801097593149,19
152.904,454.061,152.11,48.0746,-10.4009,401.895,840.169,126.617,203.33,1027,10087.1,3.40568428534289,10.4921517984227,7
1408.75,855.865,296.593,169.462,-20.5282,147.758,2675.95,168.865,532.105,851.395,31471,30.9033855167766,-3.10447812829395,10
219.423,719.834,645.712,134.064,12.4675,-25.4188,784.04,1103.3,158.344,1163.09,26833.4,27.5695953262518,11.9217628210292,14
167.123,377.932,620.203,134.936,33.2472,628.593,90.4949,1353.86,390.827,718.208,5560.19,-16.0955069126114,25.820888983324,19
98.1361,336.993,323.382,580.947,27.378,940.814,2165.32,890.092,909.687,491.36,3817.59,-11.1648482155047,-37.1239552068441,6
-25.4181,314.003,148.776,198.163,130.73,369.022,1848.73,328.052,49.3319,907.538,19916.9,20.5202893960021,2.63948249111567,20
49.4836,1016.39,227.175,161.697,61.7593,646.64,724.496,-27.654,918.693,269.764,16225.3,12.2707368037929,15.0727601911085,20
168.476,975.45,1201.77,-2.93646,26.224,278.746,49.4872,1792.97,1077.93,-2.77651,26505.2,30.2633796705707,17.2564031281157,1
102.456,419.11,493.383,1036.16,-16.7024,312.447,539.374,987.591,-54.4848,1337.11,16743,13.3173192000101,25.5471412383003,14
74.2004,373.732,936.303,262.55,-49.556,-51.2624,-26.5396,1799.84,571.963,795.938,25086.9,27.326440300689,21.3210137933966,1
58.8655,475.922,196.952,265.213,-31.0011,433.292,1037.45,317.306,545.143,799.331,7514.31,0.780514371638624,8.68129980341305,7
219.129,191.078,218.035,76.5043,-49.3653,822.935,1529.9,575.136,1037.94,321.06,7308.64,-6.01507521360657,-18.6640614374704,6
106.63,1282.51,116.18,72.8212,84.2425,467.307,-121.232,19.055,879.646,-86.8084,6543.36,-8.51086178433534,19.4070600220395,19
39.3125,257.082,372.555,970.51,-149.551,880.065,-87.1216,1134.23,655.044,-686.508,1194.58,-34.3669492914247,12.8557101122037,28
52.4382,817.622,529.505,191.674,-26.7873,193.939,-579.322,1642.49,311.865,986.438,21573.2,26.2444183327089,29.880975241505,14
137.888,386.446,444.558,60.839,13.6506,355.789,165.011,1644.09,372.348,829.804,-271.978,-41.8103335831788,-0.0853941082804539,19
-11.3954,278.951,191.523,243.4,-11.1424,566.38,418.174,610.558,1211.14,-290.836,-528.364,-26.9742461973796,1.50785321977792,19
197.574,472.119,133.408,107.814,-30.5057,670.082,536.775,422.549,1359.29,-42.5635,9278.48,-4.54607071391469,19.6387789096284,20
43.5963,371.183,288.268,-55.6862,145.121,1429.08,3009.34,802.122,-598.424,908.249,2911.52,-1.15461421228292,-37.3389299054161,6
180.57,375.125,623.297,119.111,39.678,532.726,393.629,2558.8,-499.698,841.602,-622.778,-37.3817648559929,-4.437428491401,19
67.4719,1279.45,723.081,120.442,89.5476,329.318,-38.7541,1433.29,-174.891,743.475,26783.9,32.7194795887925,18.1351308986012,1
65.856,233.084,164.652,91.5028,152.698,260.489,442.189,2099.54,-1290.31,1061.64,899.261,-28.2814786647532,-4.45232039520744,19
20.3517,150.573,188.69,52.656,1.79225,522.817,32.8776,1276.85,-247.257,829.521,1999.78,-29.6781479681616,12.5614928431351,19
34.917,561.609,386.726,662.967,52.2753,1166.34,3421.51,2027,284.464,136.254,171.792,-1.69990974662734,-41.8306062186291,21
114.639,565.78,181.837,10.1298,-25.7265,566.144,1541.72,259.583,676.227,899.735,13096.9,14.2285850965821,2.15397465593537,6
86.9853,600.709,749.889,152.693,-45.1736,450.111,121.918,1674.04,2815.78,578.443,17037.2,10.955144908669,27.6877487385242,14
41.3124,306.275,60.0431,0.713489,210.286,1148.94,-105.627,939.928,518.136,1202.42,458.525,-20.5229106741699,11.1935883625264,19
-50.7259,749.616,627.37,56.6228,118.564,446.819,230.911,1980.77,-19.3831,882.042,21050.7,22.8850206912378,23.6457566003387,14
233.139,350.808,845.307,168.233,36.3209,744.622,572.84,1702.84,1307.15,856.058,30674.7,30.9445214127896,12.5655488986788,1
138.279,349.429,84.1223,33.2971,25.4405,302.152,180.369,184.391,998.886,724.534,35.9471,-19.3596034855789,8.57476864387233,19
142.51,390.273,322.035,398.978,-122.233,399.095,142.182,3011.03,1116.59,-252.724,6457.04,-6.77740080721722,26.9803759688211,2
172.261,252.617,588.069,7.2839,-9.72007,773.315,174.413,1777.3,462.546,1212.31,-79.2472,-39.835555383885,-0.8747353063142,19
147.52,874.153,237.452,48.3382,122.261,491.159,260.17,-104.854,896.549,421.541,21047.7,21.6055987806857,19.2637372005074,20
169.331,897.094,336.258,15.2576,-40.9253,672.733,1841.09,-88.041,1635.73,32.5068,22942.6,24.1356715527733,2.72237767706263,26
27.5435,1053.44,160.268,65.9885,68.9127,404.051,244.838,345.283,183.381,798.729,11108.1,-4.16861091077999,22.0094669792198,20
86.744,1341.01,593.957,114.443,45.0344,325.336,-136.253,1091.92,1044.74,510.708,3934.32,-9.34402385648267,19.7726261588757,2
196.793,693.275,764.746,146.579,11.9996,386.446,742.306,1647.21,-995.95,962.054,9105.66,2.45328129531371,22.3172117668705,2
157.213,478.967,410.958,914.631,-16.5553,504.3,1870.25,832.658,-363.019,132.103,2583.63,-12.5235395436081,-33.1378351967738,6
71.7761,430.499,234.901,262.448,-31.5864,508.006,1187.27,708.006,1046.79,294.671,1228.54,-20.3558743139616,-19.4748830154444,19
239.808,550.204,485.852,1774.33,-177.489,778.474,2098,1212.84,265.972,412.855,90.9949,-12.6202761448668,-35.4751687963408,18
175.782,421.509,177.339,248.079,56.5173,477.995,552.662,405.573,749.537,807.957,2941.21,-18.0219493464076,5.60429176013721,7
304.494,400.317,244.287,280.255,-70.1536,363.878,5269.71,1264.25,-197.24,982.924,2970.97,12.5613333837413,-37.3004519396579,11
186.682,438.784,407.374,641.142,32.946,454.139,718.635,2430.01,-1293.62,518.529,1810.28,-22.2611789552066,-6.31675879194289,28
100.076,1197.08,184.658,593.162,-31.5091,1051.89,201.722,56.3572,-266.533,155.453,4588.06,-12.2518748394342,18.7571559206425,16
66.3515,549.29,599.029,27.8092,40.1318,546.479,380.745,1347.87,1089.31,321.727,17928.3,15.755151311972,25.4285214738145,14
136.329,289.846,256.51,-32.9525,75.1748,513.116,774.824,630.991,993.63,-318.354,620.097,-22.5503607608665,-9.06076172686004,19
-28.4907,150.673,319.515,945.454,-80.8006,573.752,172.432,99.6722,222.704,524.922,393.345,-24.1999543362291,10.270051295672,16
74.9624,379.705,190.476,592.753,73.8179,672.698,1131.35,264.36,-366.892,832.195,2713.75,-14.2820554244257,-14.7723298601061,12
95.1174,390.85,294.367,1.10539,81.8396,638.115,1223.97,246.802,453.34,716.959,3177.6,-14.3361998655368,-17.4481194184266,12
120.8,442.824,311.946,226.842,21.8324,796.45,4476.06,69.4755,-177.916,1166.2,2147.57,9.67958840693697,-36.6676789336532,11
256.724,630.544,205.445,1654.84,133.805,545.96,1083.36,160.044,998.238,-322.433,10317.1,5.96120398740555,8.17930485132664,6
72.3141,197.08,284.308,27.0595,122.723,543.597,431.859,720.339,1063.2,66.3921,1547.84,-25.5518635064117,2.0374089447401,19
67.8404,1854.86,833.168,21.0279,56.336,259.239,-64.4567,1766.22,-31.3875,1148.27,12987.6,4.50982955325028,21.8415547432687,14
369.396,239.345,126.177,33.5997,-45.6799,673.01,355.98,625.186,-452.145,958.272,16775,13.5762174133252,20.6292188856345,20
136.992,437.518,853.467,230.259,123.135,687.535,4306.88,2023.71,-395.2,834.753,2888.78,8.5312011492667,-39.7836097717969,21
132.926,326.058,381.338,175.116,0.968958,483.809,635.6,1047.11,107.819,2938.54,5355.52,-6.22225598324276,5.05427572793206,19
432.029,797.064,183.625,1479.8,-69.0422,1701.69,4574.61,955.581,-55.3967,-86.8832,365.319,8.4134008615448,-38.4495600751541,11
74.0466,444.722,597.839,168.001,-50.2468,221.274,310.66,1990.05,-556.827,1452.89,20255.2,18.8810668946494,23.7913519592619,14
71.6805,1482.43,211.759,878.82,30.8441,617.358,489.5,1501.05,515.882,-396.455,3524.15,-7.85248845540488,15.9733875918441,28
1296.45,415.96,314.797,306.255,1.26709,1606.99,349.139,236.719,-156.583,856.653,-152.326,-0.582533945694547,-3.80976675199439,25
141.665,347.236,310.128,227.627,163.286,281.918,132.376,2019.03,-162.298,1017.23,1545.84,-39.8819332809858,0.149955954169003,19
142.396,324.488,148.975,100.427,61.4161,512.9,734.121,341.611,1134.1,946.804,764.239,-18.398051378162,-3.79419031172533,19
223.342,1196.91,819.045,-85.1931,29.2328,254.501,524.203,1618.17,924.74,94.2727,20080.7,20.3556049456469,16.063371810662,14
122.515,499.852,774.346,103.472,115.493,303.321,-633.865,1980.45,-497.889,882.97,21555.1,24.8996845474038,28.8081063647471,14
104.604,1028.62,234.843,66.4277,-48.0183,519,778.963,-40.9878,898.2,290.253,5737.48,-4.43010589638201,10.2511390262009,20
199.673,280.036,222.576,81.717,-6.5825,1068.3,1982.82,814.884,-470.84,705.429,129.941,-11.3577281356938,-30.8718249923969,21
34.7499,397.305,396.859,168.135,-93.0261,462.366,177.519,2905.4,308.28,807.452,132.095,-45.7316779768301,0.362175746842383,19
25.0795,548.536,270.078,14.6075,-9.41267,609.511,6132.36,65.3757,618.698,953.89,2063.73,13.4614949602649,-37.7156681308274,11
25.9831,402.905,179.656,722.928,-291.112,590.234,-164.248,1092.63,845.273,-364.665,775.725,-37.1305682910143,13.5846244059832,19
88.2823,1777.91,367.779,-39.1119,-28.7928,633.67,197.918,892.79,1498.12,321.604,28562.1,31.2064369551721,13.6453948141228,1
193.252,412.099,488.247,197.325,49.0499,911.665,3011.09,1081.72,1600.55,-60.1921,799.265,-3.99323491423895,-41.6745998522753,21
146.618,402.626,858.205,78.3401,152.427,746.823,99.0111,1608.98,464.384,829.859,10962.4,-0.689408992378246,31.503047672688,2
80.8809,451.379,256.575,230.398,-123.397,1120.85,1737.9,172.742,1306.29,362.692,-128.806,-14.6744195766094,-28.6748043553291,19
806.779,2577.69,126.973,13970.9,-154.189,259.741,1528.98,564.003,780.561,13689.8,-1211.46,6.96738009531593,-28.0171975855066,24
107.683,420.243,313.892,172.07,96.1875,1329.79,2007.22,793.455,1053.5,226.961,2392.17,-12.3484708689797,-34.2400571204079,21
375.392,457.888,271.471,84.5257,15.2563,736.988,1349.57,20.2686,889.534,-100.353,9644.48,8.95858925516272,2.09692313531422,6
334.547,894.344,574.482,1329.53,-26.3603,260.538,713.4,2263.89,1002.54,326.734,447.322,-24.8511591846552,-8.97306352555076,25
181.808,355.815,192.897,42.4958,80.9216,381.313,188.566,726.208,-409.889,759.255,730.503,-20.2563099389232,8.13947522518238,7
256.889,1071.95,144.811,88.8359,526.187,326.398,2538.73,61.5121,475.315,813.424,21731.3,24.5589011097914,0.545505917265115,26
52.5055,428.031,189.432,197.046,34.9408,592.556,312.016,1791.74,900.105,242.525,977.011,-41.3700156464441,-2.10181242121085,19
153.932,424.952,149.263,550.472,67.1514,1532.15,1085.75,283.752,453.821,503.717,498.05,-16.6967807652163,-15.4845670712055,18
134.275,299.284,446.263,511.664,-46.6162,511.263,271.477,1564.56,1092.68,631.85,-406.592,-41.6890277554293,-2.13371364438849,19
105.058,495.502,343.753,629.306,240.019,445.243,115.961,1402.71,459.487,508.075,2953.79,-36.1664740463914,5.95650807638555,19
33.8511,476.636,207.526,701.732,6.58944,579.631,937.049,253.047,-875.618,422.195,-69.6669,-17.0229159037874,-11.1059326122265,18
438.73,319.952,561.335,285.826,501.203,613.55,893.482,1313.08,1306.42,350.506,596.751,-20.4310248563536,-18.6976659186747,19
189.536,303.423,249.808,-10.7673,-28.4174,472.42,570.896,1322.67,1025.62,107.137,477.68,-35.0981444425694,-6.71018118653707,19
127.411,419.093,179.785,122.48,-151.588,714.198,2493.3,596.153,1492.88,-424.548,8606.46,-1.35995991512475,-30.578766474827,6
609.382,335.638,310.277,513.911,27.2908,470.523,4359.96,457.736,1148.65,374.801,4202.84,8.8439918603228,-36.5712863368482,10
128.331,455.008,339.873,164.817,35.7214,319.206,417.495,1705.12,1137.54,-565.167,4496.67,-21.9393610626356,21.9020187029135,2
148.021,422.133,344.413,1049.92,131.537,660.175,271.381,595.996,182.995,716.628,-797.432,-23.9626014566929,3.68964721587963,16
52.0956,367.06,1261.62,52.7249,5.87485,627.494,723.288,1967.96,902.626,-116.052,17558.6,13.2591052690602,22.384926267165,14
37.7134,259.192,184.201,67.8405,229.124,639.892,2920.91,80.792,903.65,1209.88,157.227,-1.7854860135824,-37.1464733477901,6
-37.4732,287.784,465.249,-76.0586,198.494,364.488,170.555,1415.33,5908.13,1298.78,30385,31.8695360335773,14.7426313589424,15
123.028,406.453,1081.6,305.08,109.326,383.092,245.926,1326.62,734.907,945.006,15694.2,10.2770233538952,30.0763683296327,2
157.576,433.916,181.062,90.2597,55.0393,614.136,2019.23,-194.31,1232.9,-228.364,9027.59,0.829386367528826,-22.2567421581235,6
1205.64,534.422,356.953,245.943,-17.7342,737.268,905.608,1924.75,915.282,-109.873,412.619,-2.17051172111079,-7.43155462588948,25
67.1499,406.045,103.754,8.92979,61.2576,479.095,719.539,968.426,-61.4364,745.204,387.929,-24.6881956175908,-7.35914286515075,7
259.949,867.561,162.633,6.71823,5.38409,428.339,1663.57,406.748,-471.667,744.569,31830.6,30.4722735713361,2.04573679789205,26
115.04,789.198,765.746,-36.4482,-74.2178,228.012,523.114,1162.44,1830.17,2349.16,15227.3,7.33424961387615,22.7059887704602,13
86.1023,340.308,347.873,195.38,60.2565,335.616,496.571,1637.22,531.528,912.747,14942,8.33363099634929,28.1997325108358,2
908.362,1019.41,373.221,1252.49,-38.0731,914.927,416.378,899.782,567.726,399.18,6638.22,-0.471784046096741,0.592408108973833,25
53.0988,460.334,456.716,77.4375,129.669,639.529,1115.8,1188.26,1099.45,91.0309,6141.61,-15.3438480915795,-7.08792617200139,21
101.023,484.757,485.077,374.104,-89.8843,59.8836,-82.414,1933.89,-531.305,18121.1,6962.44,16.9358914845858,-16.8863259981763,5
120.085,316.972,120.181,793.004,111.242,889.872,2616.68,698.713,-900.98,-202.703,2285.37,-5.88068977873138,-35.1998047313049,21
53.9786,361.31,276.539,38.1932,-36.139,550.699,1297.17,1235.01,-931.59,800.92,307.168,-20.4570512436773,-22.7807676440855,21
236.876,423.07,210.117,766.489,-104.456,419.644,2798.3,116.295,223.295,732.159,13461.1,21.0065319363827,-5.44313494379892,10
131.582,321.769,256.208,181.08,-26.7226,428.181,1370.27,1314,-211.593,988.177,3541.11,-17.303378761039,-24.335101725131,21
398.079,497.477,124.027,242.791,-13.6825,637.71,4013.47,829.165,452.15,720.161,470.727,5.7478029898991,-39.2173747506573,21
36.1421,3302.08,731.729,61.7819,-33.2396,89.239,577.98,1311.43,2370.16,-393.472,22860.7,10.6763742930814,14.7499444251795,14
45.9177,440.305,260.655,157.621,135.592,629.757,163.975,-18.0027,1582.31,-596.949,15396.2,7.72138647389448,23.4032128611788,20
94.3461,338.442,264.517,80.1502,199.986,792.493,516.284,1743.39,132.011,878.879,2003.22,-38.5977937562075,-6.64027236364022,19
39.9974,302.892,174.731,22.1915,63.0531,723.531,286.717,519.497,-584.585,1063.81,-725.148,-18.2268982045319,6.19162434488272,7
211.887,450.01,902.159,673.388,102.808,229.376,357.573,1256.59,72.2343,-670.664,22706.8,24.5240286993847,19.196189222699,14
342.371,621.582,371.846,5888.55,-15.4336,875.302,1508.31,19.1966,1126.47,11003,1492.71,7.63208806670851,-23.2664106572213,24
84.2224,499.574,1202.69,116.767,29.3911,1214.86,-404.038,1447.58,-21.0562,926.466,16352.5,12.31566411622,33.9561292382938,14
522.099,474.769,167.284,115.086,-104.602,349.609,2782.62,348.652,1100.72,-34.0196,17012.9,21.6684351025629,-0.781004550266071,10
-39.169,1497.23,213.01,93.9376,68.2654,644.368,-438.084,1552.02,416.605,731.714,21843.5,25.6154957448258,26.7761644626533,14
37.8172,635.608,962.516,82.7739,106.737,577.04,-99.7965,1770.3,1039.68,160.659,22650.5,26.4499925646341,25.0741707559385,14
135.349,495.643,310.48,1286.99,20.5581,422.142,1372.75,1012.56,-292.953,730.855,218.477,-17.5069080139573,-24.0191524174223,18
109.916,195.223,192.239,168.745,-25.0273,659.09,924.426,730.176,-340.971,742.739,-286.779,-20.5360639594267,-13.6172248218817,7
80.4664,251.773,250.39,509.274,213.818,793.299,3400.41,593.159,-547.364,1035.57,-146.238,2.25463258363959,-37.505744296232,6
207.948,315.075,211.762,25.2901,-98.797,189.13,5083.2,545.898,1129.84,-428.182,23664,26.3017550447851,-4.31169435090861,10
172.791,431.766,108.197,344.945,-128.419,955.973,4314.93,646.666,-451.774,760.49,9727.38,15.0433321593179,-28.3850132790992,10
44.8048,1008.43,465.76,-42.0513,21.8718,474.737,-354.785,1270.05,751.026,1764.73,14757.6,5.17793334969041,29.1277230204833,14
34.3526,2383.84,208.919,66.6314,-46.7689,526.61,141.382,-33.5659,684.097,817.391,7879.08,-1.47623060119431,16.3701258948996,20
179.126,1148.27,1141.29,303.971,-39.0092,158.566,1345.07,1557.29,620.505,832.108,34058.2,31.0712714164399,4.70426712523395,1
43.6335,311.355,521.19,121.51,-23.1436,846.243,296.879,1601.32,1176.45,-139.823,83.5729,-41.9332160412936,-1.93380323050933,19
80.8414,1280.67,599.419,15.8667,-31.2153,207.13,765.865,1819.6,2178.64,100.132,17687.5,10.7964077546461,20.2635941516808,14
104.54,350.322,253.947,284.866,-6.38511,659.457,79.031,86.3022,1530.2,1150.74,5190.39,-14.752404819432,18.0474845226158,7
354.247,391.041,671.816,740.136,-190.418,344.478,184.808,1396.49,181.752,362.203,1737.31,-33.022182587252,5.72017498592689,28
639.984,453.391,349.423,538.989,-98.2235,429.801,2196.05,68.5422,191.76,3146.18,26126,26.6118293206139,-0.0655765970637699,26
35.931,485.74,571.146,-68.7068,163.352,643.488,945.69,2772.86,-24.4298,791.271,17386.9,13.5977618058215,22.3227805718713,2
228.326,461.403,236.738,18.1684,79.4007,787.719,1754.57,85.7784,881.391,287.775,3575.67,-11.726158725422,-29.5972127702656,6
81.4982,336.5,101.419,133.206,76.6072,599.083,1671.92,712.813,146.962,924.89,13109.3,14.1374453768161,3.85053768052595,6
239.633,282.187,25.5076,282.225,45.1244,2787.21,2094.66,1270.33,1002.08,1147.47,2549.96,-11.5489173950596,-33.9669294668561,21
397.738,379.379,159.725,151.335,19.6214,882.908,3450.11,727.225,649.545,849.422,4139.79,3.06959920020899,-38.6947875510808,10
253.033,366.822,179.839,111.139,-13.3188,1763.22,2871.22,863.633,900.999,-323.462,2163.17,-4.90319345005885,-40.9991560003774,21
81.6394,624.902,1330.08,-13.7518,78.7839,407.128,65.8947,1697.32,68.9216,833.706,22070.1,24.4761997815737,23.779127313029,14
89.284,336.182,255.04,47.2588,63.1106,798.362,708.014,77.2877,551.519,958.661,1535.52,-16.2769121074735,-0.393276440801817,7
71.909,396.225,227.658,197.22,46.842,888.531,2311.6,141.9,429.476,807.099,-528.953,-7.91294433253153,-34.1329557708013,6
507.061,329.92,173.73,49.7251,53.622,1089.18,729.519,299.495,-605.671,1135.86,-423.391,-6.45025783294721,-5.48824234988355,25
103.271,269.659,381.597,180.136,-64.7358,453.599,541.858,1278.73,1800.54,239.153,733.926,-35.3056057767151,-5.19033042860994,19
79.8031,423.663,183.201,73.4916,-54.4974,615.162,4784.65,584.475,1456.07,192.892,2009.46,9.20442476802866,-39.4532183507908,10
75.8461,370.872,473.772,141.237,12.221,810.993,-108.372,385.833,1429.05,-303.618,959.42,-27.9376550156933,14.8688314293801,19
237.57,432.925,215.384,378.004,-366.031,557.545,214.208,-177.565,75640.1,-839.604,5504.09,-1.22642939218919,2.43302829474335,15
175.251,264.885,595.102,172.801,-44.3597,639.86,-376.773,1646.66,-212.23,807.937,25755.7,29.1393717664231,21.9709127799112,1
165.529,378.955,461.506,2797.75,-173.582,673.748,962.984,544.905,-277.705,-162.905,2541.28,-15.4865194481367,-15.8359383484243,23
195.322,392.093,262.718,221.389,1.71384,1901.54,1056.02,862.047,1080.63,641.594,-874.55,-18.9307676696463,-16.1276283269081,19
172.202,559.082,957.3,118.669,40.3031,-792.068,90.9454,2934.75,-291.332,41912.3,14304.5,18.4838078327726,-20.9442971342446,3
106.132,339.797,565.002,694.984,65.458,1079.78,6687.92,1126.63,-119.018,777.175,3064.39,15.0866550726638,-37.6235330090954,11
130.714,506.429,204.652,123.434,-11.4237,189.614,-6.54634,1329.66,-167.53,17655.5,-1280.37,14.1273227442493,-18.0211245169904,5
168.85,470.398,344.527,232.169,165.215,462.351,291.642,1126.57,-629.919,1255.33,281.239,-22.3779662444709,1.56860824895959,19
191.147,380.001,253.564,134.285,-8.78427,706.452,690.777,1068.22,1308.45,661.984,305.778,-28.8814219135181,-8.60015768645139,19
81.5726,265.467,288.522,791.841,174.668,1862.1,3406.53,1419.3,-1367.35,4.03414,4781.47,0.885618967949122,-38.0823072748321,10
14.9173,1209.84,698.01,153.076,128.596,352.277,228.503,1922.95,-793.193,1209.73,18847.9,19.3226897971172,25.3812311849986,14
161.563,554.826,565.545,148.605,145.796,512.016,641.22,1340.97,349.429,885.079,1018.02,-26.4058105303541,-5.32447460817388,21
308.735,591.14,383.747,280.309,-116.503,581.154,4989.9,988.315,106.059,858.919,52.241,9.95524441086184,-39.2823471595865,11
12.5009,408.857,336.297,351.721,45.6822,660.751,3806.14,1000.19,950.03,-230.568,1000.5,2.93029678451604,-42.5310051268294,21
151.221,351.71,315.769,1818.91,53.838,815.103,-157.051,190.202,183.183,-552.641,698.28,-28.1149720504399,10.2157959632096,16
554.635,375.015,277.743,579.492,150.333,644.563,1522.7,373.623,-316.802,765.675,3900.43,-7.52425498063356,-20.32789117292,25
141.378,396.045,293.7,-21.3115,23.4127,377.989,137.89,223.865,911.343,-183.659,639.311,-20.7811959953681,10.4608534253757,19
34.3558,406.757,833.743,69.6579,-75.506,309.337,767.701,1432.97,1315.92,737.763,21771.5,19.6218880202987,17.3327316123948,14
89.0413,301.212,227.939,148.327,-9.67269,439.022,-99.9902,1345.03,1342.96,178.511,1957.78,-34.294543829596,11.5407525523035,19
122.62,410.607,446.733,37.5845,43.5953,556.165,429.281,2011.07,464.7,755.798,143.522,-42.4688059916007,-6.53882041562917,19
146.454,635.958,112.29,67.7592,84.3245,446.864,-0.738863,183.458,1076.76,-362.019,11397.4,-4.23415422847067,24.2504802054024,20
76.5369,1058.28,751.907,87.3675,17.4236,495.531,588.171,1944.32,1008.02,305.496,21534.5,21.7207286663492,19.5593972687914,14
309.724,312.072,207.802,2251.3,57.1234,935.828,2072.6,257.462,-916.929,-322.427,2731.75,-8.09676552582903,-28.3653885639665,18
85.9494,375.316,414.788,204.551,117.441,578.4,-321.219,1258.03,-1037.34,2008.54,3040.39,-15.8162261905378,14.9914363722458,19
82.3995,564.295,729.434,85.4064,2.59668,692.934,4609.4,1019.22,915.467,-57.6095,-16.3392,8.0375000255453,-40.8385562609938,11
274.788,539.095,319.747,183.723,-33.1211,710.709,1093.92,630.782,1218.56,-576.484,985.766,-17.9919551755547,-17.8135261679154,19
148.108,468.906,237.839,67.2636,-51.2999,504.288,2647.42,338.177,1361.77,-328.26,1011.38,-6.94366091865575,-40.9330615730689,21
69.4899,347.609,464.452,218.336,163.693,443.802,246.999,684.238,316.138,821.899,1513,-21.8959622397603,8.32124907002159,7
76.6563,370.385,259.059,-28.9646,64.4735,520.737,638.268,1730.19,993.134,217.585,667.294,-39.0714439097171,-9.14616545012933,19
139.927,454.684,289.514,84.9851,9.83877,504.953,527.479,427.866,172.153,762.713,438.813,-19.8605006398717,1.29030823998593,7
200.239,418.101,348.689,125.398,-203.839,500.046,952.672,1310.23,391.186,3048.68,1353.8,-14.5330150040069,-12.6809137902529,17
118.154,300.724,778.044,70.5957,4.17285,544.841,-9.86631,1867.05,488.934,998.96,22663,24.4431983880022,24.1480937791447,14
68.7696,554.257,786.344,189.192,160.49,860.129,730.876,2082.18,73.6665,764.441,22648.8,22.3417267164083,18.3341371886825,14
120.122,501.439,269.139,263.083,8.3899,824.735,2600.61,162.747,959.751,74.11,5926.73,-4.50847522815208,-38.583999397245,6
-19.1186,1611.05,576.931,235.493,-24.9945,7.41651,346.998,1542.95,-920.098,838.341,13382.3,7.3067722585042,21.4888009970844,14
27.252,403.067,245.128,122.716,172.581,569.426,301.546,659.139,-143.844,1297.92,6561.54,-11.3207438707395,21.2451745405413,19
65.3068,201.664,457.511,883.179,-72.1919,744.552,813.467,1172.32,-385.77,405.126,4320.17,-18.5429311348668,-1.51221704963057,28
94.4431,245.656,130.314,643.479,-54.8005,684.443,-53.6874,1122.08,-113.495,-250.711,2066.3,-25.9090471004966,16.7991179737251,28
15.1659,501.387,476.204,0.856927,-32.4582,488.105,95.7027,1495.55,2879.46,45.3041,1749.39,-16.4698485524951,9.67668338810731,15
82.8422,437.76,309.01,547.377,8.50459,538.194,-89.8409,1289.75,969.058,1037.26,4844.12,-21.2329400205898,22.3351338446504,2
311.506,509.539,216.628,57.1192,23.0096,488.362,-8.20284,371.429,719.542,877.184,-897.29,-19.5001623360982,8.1068431454045,19
917.84,531.63,179.005,109.265,124.311,580.78,4558.03,142.095,-593.404,861.953,12306.8,20.7636699774922,-20.7806184921952,10
-28.761,515.65,503.135,113.65,24.7173,465.562,143.988,2407.93,-345.224,787.734,-413.31,-45.4736546998792,-1.67598680345628,19
93.6994,496.113,1007.22,177.479,50.3243,129.516,542.591,1977.85,-391.428,1532.24,19253.2,17.1113598504716,23.8750008851247,14
16.0607,346.361,543.254,103.118,-51.0274,691.963,-118.276,2262.65,326.53,1173.27,980.04,-40.1683569817186,7.48074786005594,19
76.8838,364.888,524.545,183.463,39.676,451.784,877.456,435.648,1851.62,-293.667,14583.8,11.2395594992859,13.913146293993,20
268.223,1417.32,309.219,117.308,-7.49578,518.503,1566.82,124.418,1362.61,378.105,22897,23.994364191329,5.64732992110833,26
370.968,327.879,162.068,89.5892,92.1636,974.72,501.448,361.615,-36.9019,842.58,777.199,-13.2648623256456,-0.950844045513914,25
176.362,1148.51,783.277,71.2416,31.6426,112.811,-699.672,2463.99,1209.93,552.602,25089.2,32.1763170093523,27.0170471063614,14
184.994,427.806,455.791,748.002,-80.7594,668.388,2422.48,734.948,285.121,368.089,2636.99,-8.42839931995174,-38.2001963578568,18
161.421,437.013,681.743,39.5852,-100.582,630.487,186.376,924.912,1069.52,457.654,358.003,-37.7814466466844,4.32971544070441,19
8.33775,412.393,325.992,116.59,126.902,881.632,1200.24,732.625,904.903,-366.478,759.506,-20.7127709908245,-19.8318087843611,19
669.953,153.795,179.971,650.656,13.7936,803.124,139.113,148.111,80.6618,-303.717,1112.72,-7.15104536242929,-5.16490417596523,25
329.8,963.646,663.89,6.66135,57.9741,346.236,244.218,1621.22,1549.24,-132.943,25585.3,27.3578674049698,17.0378600787141,14
205.123,463.779,253.178,13.9394,-100.264,618.861,-188,1339.68,1368.02,-30.1101,20326.6,21.3619551816959,27.7237795110612,14
121.7,479.904,529.768,78.612,4.67418,519.988,512.125,1343.99,1490.93,507.309,370.493,-33.6740826632103,-5.30928042271039,19
173.304,364.393,47.7253,334.481,-11.5787,475.033,1133.8,251.33,486.398,1172.07,4887.58,-10.0114390570379,-12.4230699795975,12
151.269,267.673,365.961,179.366,-117.377,473.874,321.285,1930.52,1174.91,502.033,263.107,-48.01868952171,-4.28568101887813,19
413.306,680.332,296.339,586.669,-116.809,976.389,666.743,2029.66,-337.169,-40.2045,882.973,-18.3486548114853,-7.01237135945885,25
148.302,384.603,284.061,605.216,15.3585,630.883,1242.34,1065.85,-263.887,573.452,-741.585,-19.0209379096218,-20.9096234155691,18
168.176,278.482,294.078,132.963,-7.65473,987.316,2089.46,617.548,957.024,-328.964,5246.77,-10.794581868874,-36.6987909511723,6
95.8945,395.725,828.323,93.4143,48.7393,452.635,871.849,1737.95,584.707,808.852,19703.2,16.4340339666665,19.4850664298514,14
9.01184,436.8,180.094,296.672,-58.0584,-119.129,1266.41,141.377,618.291,26742.7,1214.18,17.3385575732378,-23.2933125801228,5
437.694,365.709,166.011,230.141,1.81734,1212.99,1200.72,167.262,-388.119,877.196,56.4408,-11.681400386287,-14.1186430371932,25
358.731,338.228,531.36,121.457,73.8512,463.545,155.292,2352.82,4978.02,56.0043,1373.34,-6.72919921148759,6.49111650966972,15
-47.9209,254.611,469.802,296.398,68.0959,479.907,929.444,2098.55,443.171,904.75,1384.75,-34.7736455825214,-16.0353348264077,21
115.54,460.186,104.623,175.083,8.61503,391.086,-83.5501,385.324,734.601,769.812,5873.73,-14.0212436249488,23.7335973232551,7
196.349,407.743,166.248,150.957,-61.8379,641.657,520.197,284.458,1300.77,-263.428,6556.57,-14.2938976003306,20.5071686126001,19
627.755,1241.81,154.65,40.2639,113.781,900.767,140.331,163.2,931.179,90.2252,28628.8,30.6420102362249,11.3383233412216,26
96.3735,861.266,436.999,126.531,150.622,719.826,409.506,1217.18,991.466,468.989,1547.28,-23.5029997732729,2.78482865645143,19
26.9421,344.517,227.744,263.585,-183.882,700.103,-201.959,1537.93,915.151,360.727,2007.06,-36.753011757807,14.2291426292642,19
92.732,363.155,481.267,61.4254,178.234,461.316,363.472,1157.45,-155.63,739.216,424.843,-27.4263052766915,-0.923950070123809,19
138.04,344.411,116.542,458.179,29.6137,547.93,409.489,1695.01,1307.64,-129.482,2032.27,-38.1083211791611,-2.38060977785214,19
182.47,382.776,501.675,-141.349,81.6492,542.571,52.1486,2328.32,1035.8,170.484,19997.2,21.122229214682,26.4098967247818,14
106.483,427.415,176.589,1.53063,67.2742,450.941,68.1383,717.529,1030.53,493.227,1042.68,-24.3141573162348,11.263149017965,19
77.9719,584.963,1279.97,639.975,157.483,262.776,-274.243,1245.75,-129.616,153.018,13460.4,4.17149022573857,34.0226996080505,14
182.982,359.431,264.491,59.2419,103.286,502.541,1700.3,983.405,297.284,865.915,473.565,-14.4611902775434,-27.0241298938317,21
246.379,331.389,120.142,50.2259,49.5762,608.339,891.637,318.057,1283.87,-853.746,35004,33.4240258484448,4.9645934016446,26
42.5498,756.22,1302.35,709.772,55.2949,704.032,354.254,1847.61,-327.085,770.402,11973.9,4.08440860889157,31.2707348448996,14
27.0653,548.605,244.902,164.755,-22.6732,593.913,599.691,-160.777,884.45,748.733,14297.5,7.45016083759674,17.0517070216952,20
99.1911,391.2,709.067,590.142,-45.4354,1199.57,7130.16,1712.03,-678.302,-14.2261,6808.9,16.5160622307906,-36.9697644004694,10
97.197,318.836,347.586,65.422,-100.602,2495.36,2874.73,736.265,1145.88,655.508,486.888,-4.54617795340202,-41.1947578481457,6
63.4738,1017.72,356.128,-9.44446,62.0976,1248.2,2454.49,-149.351,1280.38,1051.31,23291.9,24.867890368459,-0.457227113730973,26
37.6256,386.038,371.473,203.429,30.3849,2850.87,2700.5,1174.83,133.996,831.243,-267.336,-6.62021261883987,-38.0104713219557,21
94.8028,290.404,280.058,788.869,152.643,870.159,1936.54,1190.36,-657.595,-477.674,4002.03,-10.3453501328848,-30.5444630996819,6
82.3359,727.367,592.424,115.453,-109.975,329.129,249.7,1435.71,345.743,787.96,21480.9,22.0420067439055,22.7978149412874,14
302.596,522.126,318.998,170.839,51.2841,809.837,1859.88,806.507,251.488,1387.33,895.984,-12.0688163525955,-29.0280088395378,6
69.4757,494.059,196.182,-97.5825,113.065,346.17,1707.78,205.888,1227.06,522.276,18563.3,19.6079815871841,3.62163212581465,20
107.314,455.573,197.136,298.821,-75.3448,666.022,3419.18,130.437,902.212,-502.113,14314.8,23.2382884488286,-6.44761631063336,10
114.297,1135.59,867.501,-19.1136,119.931,319.082,-22.3854,1684.62,919.238,745.791,21511.9,24.4925723762439,25.2421590393835,14
28.9341,361.746,559.01,177.72,-228.168,662.015,-272.451,1687.89,1202.5,4.61553,1866.65,-34.7438588362831,14.9421745124125,19
111.032,379.681,194.357,146.25,1.42871,555.018,424.673,-4.84137,1980.46,186.39,5945.76,-11.7177549834822,16.5652021827631,19
1585.85,525.6,205.783,471.293,-64.596,459.019,3836.45,-30.2519,1279.31,765.744,6565.17,8.6601202333983,-32.2254803465698,9
47.9247,1127.21,949.225,-28.2202,160.668,630.721,294.718,1899.14,1607.52,220.61,3043.41,-13.0463957084221,11.291986826311,28
100.867,413.11,259.449,202.979,48.0922,486.591,-129.808,255.691,589.905,994.597,42620.7,40.4683221524307,7.60799030517813,26
199.646,1224.75,984.065,89.1575,158.784,371.665,-175.652,2365.77,-126.387,708.086,17980.6,16.4646069670187,27.836876147263,14
104.413,1953.4,1278.93,94.6047,-32.7185,237.679,192.408,1490.02,1568.05,138.669,23671.1,24.8407791516418,18.3708770757651,14
53.5891,364.216,265.762,168.528,126.306,1845.57,331.313,473.37,-33.1388,849.298,-727.798,-20.7622219105019,4.94163483868255,7
71.8216,405.341,202.709,266.153,-40.4184,538.539,110.119,176.007,16.8244,1090.95,8351.22,-12.172008238001,24.0541933901253,7
416.66,310.201,120.18,49.0707,40.2122,794.739,1527.86,343.17,1103.99,-1130.17,340.851,-15.3845877390357,-23.3329640101468,19
-12.7883,262.973,211.344,40.1084,-58.2572,2058.96,1900.92,805.614,1153.2,-229.654,1058.17,-15.3852222148383,-32.3410675241973,21
443.701,451.328,231.722,248.812,-38.0601,653.844,3671.5,1065.21,-171.555,701.724,-47.5827,3.64874836616163,-39.674086241052,21
131.815,213.246,221.046,-27.8889,137.911,316.808,158.535,467.664,-150.09,754.4,759.218,-20.5878603071314,8.53736184278363,7
114.805,620.526,257.652,657.992,20.0055,700.624,2216.97,294.287,849.946,-260.075,18645.6,20.4215150506692,1.78793862669492,20
29.0721,329.219,489.953,209.77,30.1968,543.818,794.142,1828.09,1176.63,232.192,5500.9,-18.7689625700405,6.77685283475283,2
40.8067,312.822,288.803,127.295,316.373,697.407,1145.31,1783.27,-393.309,800.766,1086.23,-26.3846115494714,-20.0613860071879,21
72.6282,389.022,472.222,803.287,69.4213,447.268,-896.465,1157.75,584.518,414.687,22216.5,26.3043371428314,32.0653878324297,14
29.8842,731.781,613.614,362.145,102.016,536.773,127.281,1542.34,195.983,715.908,2433.22,-28.7781301106985,13.1085067917375,19
83.557,484.325,1273.22,2369.88,-11.7239,499.499,-54.109,1204.15,-187.845,1706.28,17869.9,13.9170859450429,31.6211174502039,14
143.241,390.933,412.26,714.253,124.41,497.111,282.276,1926.63,555.959,-304.475,2669.57,-38.9524543718863,0.922668461104476,28
-44.6478,165.877,147.269,141.17,-4.9598,1372.72,879.047,494.976,1167.92,2585.79,16380.4,14.11453428804,11.4040661193121,20
72.802,849.734,634.014,408.175,13.2651,557.78,195.811,1749.53,95.2402,716.439,13377,5.10956596558295,29.4020688169176,2
1.87578,390.717,361.611,143.011,17.7473,792.589,2258.86,1634.6,610.733,830.959,1441.48,-12.1604272639722,-36.4427078944511,21
104.118,552.172,250.054,19.4378,-99.1689,954.553,5888.1,182.075,959.414,-208.445,8034.56,14.6360395386578,-35.8081308016276,10
6.06606,732.096,202.092,33.454,-44.3645,829.459,592.401,339.331,937.314,-78.2296,12883.2,4.41316725261052,19.445122604063,20
69.5534,310.841,499.551,106.986,0.566555,664.862,3777.72,1165.95,-365.645,856.553,117.73,3.81621795280333,-40.667916154042,21
198.756,727.74,168.751,89.1305,191.272,612.202,2722.95,900.147,9.39133,860.666,3544.7,-4.83109317227979,-37.5734474499609,6
32.8364,486.799,328.511,169.974,34.8822,436.694,95.1769,2013.13,916.2,817.048,12501.1,1.70180156319466,31.5651207077094,2
[truncated: 8,052 more rows]

## Sheet: HIV+IGg2
HLADR,"CD38","CCR7","CD107a","TIM3","PD1","TIGIT","CD27","IL2","IFNg","CD45RA","tSNE_V1","tSNE_V2","louvain"
679.092,502.566,74.5338,141.992,-50.1709,749.979,5429.39,1395.79,3411.28,6822.72,301.794,13.7475095083638,-31.9442301042689,17
114.601,262.973,178.777,610.762,71.5239,153.403,28.7021,219.216,178.552,-93.7686,133.938,-29.4456993170724,11.7995062882727,16
222.77,414.91,375.56,392.873,80.6441,126.356,1661.84,1099.45,759.649,757.842,1153.03,-16.5415167131241,-24.5964783441947,21
106.705,213.348,386.753,93.9734,68.626,197.927,60.5453,3091.05,1521.91,2529.59,7661.71,-2.63810855685368,26.4628827585876,2
173.564,1659.57,293.94,157.4,134.948,124.653,441.415,2459.27,-421.771,1490.08,17440.6,11.99273230688,18.2047903044161,14
307.523,436.892,510.531,-33.4544,-114.508,-1018.59,1249.1,2346.16,30145.9,52067.2,17428.6,27.3223379812412,-22.0133782079623,3
185.675,1240.01,511.862,97.6036,-35.6982,56.7228,-64.38,2380.07,919.348,918.931,9285.64,-2.52268339688829,30.0734400963783,2
153.773,2650.81,802.97,242.658,21.1032,126.1,100.063,2158.13,1214.21,2543.95,13501.4,1.47277818404727,19.9176723118691,27
187.16,444.519,602.419,177.601,190.194,552.643,2596,2569.45,4310.1,2936.6,149.636,-0.615049502059682,-32.0183174099065,21
232.207,217.832,90.9607,752.241,-4.60028,214.998,-27.3818,432.983,231.27,-1.24904,238.566,-25.1986816197895,9.99474333095478,16
542.034,283.712,159.072,165.104,29.5723,370.696,2991.58,485.33,1016.24,811.635,839.033,-1.46013936490874,-36.9185307002547,9
197.218,254.084,133.327,897.745,44.7507,552.144,695.214,821.465,125.259,92.6508,191.875,-25.9891787216736,-9.43772558343462,28
125.063,388.868,72.2343,251.561,-53.6797,148.143,291.694,395.37,876.318,788.014,9666.4,-9.47477553243599,23.1413979331854,20
134.399,972.035,1147.32,-140.057,291.497,363.984,566.005,3244.21,1599.7,1799.74,8194.13,-3.61216140823849,26.0375166279592,2
198.535,465.565,233.759,168.475,98.5974,39.647,1485.6,978.307,13342,20085.7,749.113,17.1684848594846,-17.4689134255982,5
861.064,298.862,120.906,3066.49,-266.573,310.002,1544.94,738.346,-159.029,220.167,-56.1216,-6.03341020124736,-21.2682936369686,25
165.318,294.803,143.021,1660.02,-2.60305,175.745,609.959,233.563,265.5,123.549,449.44,-21.0833196712613,-10.7765141230843,16
3.378,349.655,132.298,214.703,307.394,268.849,80.8697,842.004,5347.84,7948.46,1817.85,10.9211340542313,-14.559448150622,17
271.98,301.715,11.6107,180.273,-15.9814,124.551,-208.477,3055.31,4840.55,9832.74,2123.6,13.3477462580579,-16.161680372554,17
133.397,323.166,812.043,1.32281,112.105,26.2883,131.66,2308.57,1374.71,1735.98,15407.2,6.54496933937666,28.0721798171895,13
82.9043,367.058,93.1265,605.984,16.3729,162.283,264.925,1942.66,143.129,238.531,1038.43,-38.5614454220742,1.6045860801904,28
216.733,5362.73,366.803,599.822,-107.863,65.9782,560.508,1836.52,109.537,200.669,8514.15,1.80536775938052,12.0209195181131,27
161.484,350.761,985.421,813.858,-24.1178,-64.641,758.1,1890.3,388.691,933,12807.8,5.14024947650198,28.4338570971861,2
155.911,4504.7,535.323,145.595,81.3164,-18.0718,398.11,1901.78,2063.38,3557.51,14531.8,2.55838175679145,15.4049146642982,27
167.81,598.683,57.7109,852.468,6.48478,204.464,3556.47,518.735,73.4388,227.308,8199.68,1.77529984327386,-40.381122729466,10
135.569,243.448,73.9913,49.492,22.9978,185.345,566.103,2773.98,423.275,9756.38,95.3626,12.554377156918,-14.0853149545862,5
161.306,345.287,333.534,569.585,-47.2149,137.327,5347.98,1769.63,76.4196,345.62,1919.85,11.9472822815268,-39.6756464822369,11
143.583,278.436,149.334,591.747,27.0609,299.836,631.643,203.688,337.277,-0.527054,277.136,-24.7899542786202,-4.75865858422576,18
81.4133,597.267,1031.67,195.578,37.1035,-17.8463,457.577,2300.31,441.358,705.159,16435,14.9428536456898,23.050112520775,14
68.1252,203.234,299.718,638.808,-99.0098,196.31,89.0666,2197.43,356.802,121.765,902.678,-38.8320698564168,2.84354063734476,28
42.7961,360.532,257.783,77.2486,-26.7798,257.804,3139.11,1354.21,900.632,1905.87,356.009,-1.94284398660986,-40.1024447759731,21
667.394,1244.95,15.577,178.694,126.37,189.419,833.653,646.842,2020.43,5424.99,-240.5,6.89764633265989,-15.7448853277833,17
165.954,330.683,579.503,45.463,-17.8965,235.837,233.618,1529.71,1012.25,1085.53,708.612,-42.3322811079007,3.82039479097309,19
564.221,2040.85,1278.66,1314.19,155.104,3961.6,213.151,2989.33,259.477,650.625,8492.77,-0.585238402316149,21.6722558614152,2
320.693,277.818,159.921,484.779,31.2324,225.894,2491.71,571.449,105.806,925.661,2344.67,-3.879632546412,-34.8308340819921,6
191.102,386.212,160.895,683.024,44.2542,472.313,44.4982,243.249,125.904,169.519,229.887,-30.8244065584839,11.4187119595699,16
636.377,1671.38,356.071,931.859,78.2267,692.14,1451.45,1948.37,62.707,429.815,1558.88,-11.0663661492483,-24.8178997505761,28
1256.99,417.469,121.574,27.5825,-92.6753,182.272,256.234,328.285,3227.44,5912.6,-35.7435,2.4953286251883,-11.9908281066554,17
163.129,417.516,246.539,581.669,236.631,253.205,526.401,1885.65,-16.423,49.7187,2221.91,-37.2832052133256,-2.79410678409693,19
92.0207,224.695,107.361,702.356,21.2248,141.215,875.682,1792.04,168.387,54.4154,839.376,-26.2675910751696,-17.6392158576954,28
178.84,398.664,600.12,231.221,67.3556,152.563,700.918,2434.66,596.618,953.097,3460.89,-40.5251214031887,-3.01783074542493,19
166.696,204.76,234.393,-34.1577,-57.0384,-191.449,174.39,1474.69,10391.1,20056,-1402.87,17.0235806578166,-21.6144010133819,5
209.035,338.851,183.495,188.551,65.2361,184.401,192.64,277.5,1617.06,5579.53,1597.72,6.43671614731847,-14.0131321075531,17
272.263,421.458,133.795,567.292,102.895,1379.7,2613.76,730.474,-1.27913,277.164,199.102,-5.72540762023763,-36.8531819968502,21
176.101,732.658,1429.75,72.2408,56.9313,-79.4266,957.47,1884.19,1441.78,2713.82,16350.2,15.9271333934912,18.5097466332247,13
426.133,1086.84,1015.17,210.78,134.871,261.423,798.033,1732.32,934.61,1276.59,12364.2,3.41745720841906,21.4288066969234,2
312.92,681.223,433.595,1168.99,-71.3132,251.4,344.574,2832.25,3.92488,220.953,6367.83,-7.96030005503425,29.426959770959,2
135.548,535.333,236.492,16.1912,54.5241,110.629,2326.58,2872.98,3537.84,4021.47,5242.44,-0.653618985206382,-31.7450482248062,21
108.734,1169.97,674.542,128.561,100.738,62.0142,1226.92,1976.75,546.001,809.168,8849.64,4.95577383049633,21.8332902479205,2
1847.5,1071.07,191.102,5021.34,60.2178,-45.016,178.633,459.164,333.503,325.184,28673,8.64584055180823,-2.25616140530074,26
196.834,282.024,134.691,1339.58,-101.75,193.683,1102.75,393.157,371,106.573,139.805,-19.4075384268345,-16.8167219884533,18
138.685,13947.9,1681.91,114.27,104.438,345.666,581.304,2777.28,9424.27,20917.7,4197.41,17.6686774714144,-17.0675741935065,27
260.169,649.763,268.774,92.8353,30.016,1009.57,-302.845,1452.28,1294.58,1955.31,10448,-1.54007205250312,27.4759489397188,2
180.963,321.946,-3.30617,751.375,26.3556,113.508,251.916,2292.73,130.557,149.722,4462.91,-21.8155075652949,21.6794033782101,2
236.367,444.537,131.56,-72.6659,44.0604,389.917,587.372,830.199,5749.57,5054.23,991.63,6.40961937288819,-13.4045491754546,17
196.2,283.774,141.758,1092.14,64.125,219.636,560.007,1510.88,244.743,31.8283,4182.05,-19.2144882370889,-6.51535730032073,28
87.6639,890.011,1193.99,127.228,-60.9461,15.3287,757.689,1911.21,1455.95,405.572,15274.9,12.1669552522474,22.5048561634064,14
122.308,312.802,163.503,646.328,-27.7196,406.374,1993.25,329.94,211.142,328.883,6.79544,-13.0723397337732,-31.9541251480346,18
19.2574,257.956,103.047,583.363,136.135,701.621,1317.63,415.307,-7.5703,178.313,460.055,-16.5581520173447,-19.7430711333373,18
276.702,722.026,1700.52,158.059,-46.1695,172.74,-230.211,2026.79,838.042,700.151,21780.5,28.0871790818214,24.9771918497787,14
186.139,2049.84,181.32,174.128,171.599,7.62594,130.95,447.943,4672.95,11355.9,481.752,13.6195987387577,-17.6102633446051,17
235.129,481.322,286.854,294.38,-15.408,305.349,1492.61,804.496,3207.83,4804.6,268.242,0.0802946197371629,-21.2215159976544,17
51.3405,321.651,235.158,6.37,65.6516,166.971,1514.65,2716.35,284.392,1393.78,1128.37,-23.0849457552149,-24.5955152516255,21
181.144,230.873,555.767,788.015,-124.245,482.604,42.3106,1567.74,710.612,309.909,4122.29,-21.7319803582783,20.0626908395862,28
183.489,252.931,150.157,-55.2817,26.3904,365.783,3933.3,933.382,8103.6,14861.6,1414.82,14.7145712462706,-25.9989143283151,17
85.0095,963.148,54.2187,247.919,124.745,119.67,624.728,343.439,946.876,612.841,2110.9,-10.3263970633551,9.20308546111964,4
-5.00504,160.535,124.353,58.8875,28.2463,94.3871,759.75,2235.21,763.793,1515.14,886.29,-29.0122783364825,-17.2685771181834,21
219.775,202.089,154.845,147.367,76.3999,-107.431,427.233,2373.4,4719.47,12186.9,3525,14.4368729933843,-17.3948510895983,17
157.334,1063.96,825.148,155.942,107.639,402.222,-327.697,2607.67,902.626,712.087,10320.1,-2.15230300700365,30.701831771496,2
295.7,362.253,161.817,1786.84,73.1093,277.28,1561.77,1901.65,-0.42317,97.3727,258.718,-17.4656680309917,-26.4883979892368,28
91.7173,354.896,38.2844,1073.12,182.449,303.621,285.278,2589.57,-163.585,133.978,2288.43,-37.9952084611152,-1.14018559777881,28
105.986,2113.66,1716.88,721.042,27.7935,-180.629,940.345,2423.92,-237.386,215.61,28689.2,29.3683430792277,9.90111617812399,1
341.421,660.577,202.694,852.706,-80.7589,90.7994,2617.84,258.823,521.476,176.532,7250.14,-0.229503162192118,-33.2899701819548,6
309.783,721.075,600.174,22.4069,114.75,-64.5231,515.193,2080.36,898.724,1212.93,14058,4.9758961202582,26.124046330899,2
7.58164,220.378,899.345,-36.6956,14.7815,-21.3585,-316.519,1952.45,351.644,3169.94,11322,-1.02759051914267,31.7174972602031,2
728.089,579.861,84.0671,1213.46,-109.711,260.694,2694.21,136.342,-33.6924,173.751,609.074,-1.07786082729101,-35.4234456984822,9
313.949,511.919,657.153,883.152,-101.868,114.873,1398.24,3652.31,95.2981,393.973,1080.11,-18.3112339006477,-17.1456777115013,21
143.322,262.785,253.676,993.259,-22.1189,484.713,4389.19,1423.77,-102.061,154.572,963.67,7.38745800710752,-40.3552575075513,11
82.5604,209.838,109.461,71.9432,88.2712,450.946,1707.14,998.257,5139.13,-231.298,1410.33,-9.63032749497178,-13.4036439041831,15
116.913,283.013,438.7,663.604,175.474,137.598,691.963,2290.57,-62.0091,128.723,3036.84,-30.3210214738123,-3.65640960831216,28
359.279,174.699,134.071,1420.42,0.914083,177.907,2967.96,56.6567,-4.84181,39.7647,71.8986,-1.14263313817303,-36.1644634884421,21
127.158,257.887,16.0048,563.907,60.9678,459.545,3195.54,1709.92,24.9485,208.103,23.3663,-3.48755702611458,-40.7065002145938,21
376.272,1172.46,-51.8166,4438.69,-21.6008,949.614,5561.46,877.175,132.466,272.145,1785.1,12.3061877232244,-37.2961632242653,24
610.454,1658.46,693.992,628.993,-36.2489,3270.29,137.07,2265.15,1288.06,371.437,9064.07,-1.73793438577349,19.7088718470384,2
63.9152,186.32,135.493,117.627,107.493,154.905,258.515,68.9182,1203.61,2354.48,12.2413,-9.82694895495377,2.06988509900543,17
315.829,233.106,66.3157,1064.68,-82.3938,122.157,-15.636,208.035,-6.77986,92.5081,-32.4014,-21.4143152525163,5.0684001196288,16
51.0161,1010.33,591.262,610.121,-124.751,-75.7258,-9.27486,1746.62,255.122,209.045,14545.8,7.67550171632691,30.1936773796563,14
619.466,1756.11,239.498,1751.6,3.45421,1549.22,593.656,4538.17,573.822,266.752,2993.28,-8.15808180366317,5.73737486815659,28
234.162,758.769,931.564,229.55,104.679,-95.5513,22.7603,2785.17,786.564,1735.91,18628.5,17.7793280317748,28.7145463706517,14
40.838,271.783,705.428,602.688,17.646,161.52,976.163,1756.22,90.8768,36.6375,2256,-26.326314874987,-18.0299926547912,28
134.456,320.236,26.9966,679.004,-44.4567,123.144,1271.41,2132.81,147.704,-31.0894,1013.24,-23.6522038161697,-23.3613233780225,28
223.921,871.339,641.466,443.194,136.526,363.363,169.134,1283.17,826.186,1030.54,22372.2,25.2198294186623,23.6301914322295,14
291.774,874.371,1630.48,708.938,-70.2118,-43.1669,-430.334,1871.96,235.402,14.2825,24973.2,29.3674124648517,23.7355659778023,14
138.734,153.556,35.7071,699.553,-106.051,87.0956,1757.19,335.724,-103.831,135.862,125.041,-14.1509418028222,-29.1705076698601,18
-13.3503,219.308,261.233,596.302,441.639,150.75,1148.95,2141.09,376.185,34.3648,8168.38,-12.8063161474983,8.76057843043355,2
361.326,353.159,543.822,1235.79,-192.762,-2.86351,-134.12,2239.43,215.285,10.7813,15148.8,8.12256102015986,35.5545525396505,14
117.31,2167.11,314.383,139.631,77.5304,-137.351,465.979,2348.54,55.8099,739.2,21790.3,20.0545467438102,18.8285908017586,14
228.489,345.137,106.32,630.711,78.2978,137.568,2556.65,462.644,214.279,150.79,2971.53,-6.37161053653379,-37.1176993113221,21
304.14,512.833,542.198,941.947,-100.787,-62.7341,-23.4289,1718.22,10.3395,352.78,13731.8,4.56235340785055,33.7744461724944,2
54.6581,216.831,77.9631,560.447,-89.9147,132.382,170.655,487.74,204.147,189.958,2661.01,-22.8913739437682,15.8112734298971,16
75.8497,264.527,154.106,850.915,-0.396709,-123.141,1324.43,158.051,113.291,102.123,25959.7,26.2420937864258,4.88435603512155,26
57.0725,190.854,218.816,190.549,-4.30617,32.8385,457.586,1280.92,793.171,1170.41,1617.04,-35.1446822486591,-3.39519352985404,19
209.933,253.349,226.118,333.621,44.2856,-127.451,205.532,1501.51,65.8521,8468.23,7873.82,11.4631528472825,-11.8325674735322,5
383.576,353.033,61.5012,941.723,-40.6916,210.667,1537.08,195.945,-98.8298,198.833,589.881,-14.5072569021957,-26.110783867853,18
67.5392,6264.97,284.797,150.628,370.999,5.62456,-272.94,1938.14,3770.18,78.3451,14457.8,1.69188413133289,11.9549609607781,27
182.874,234.694,256.11,-60.9937,19.6921,463.891,4710.12,715.49,2804.66,6579.35,182.961,13.1735094317853,-31.6058215657108,17
403.876,348.735,237.616,897.806,-2.72203,234.975,545.071,1329.49,207.464,396.487,1206.41,-20.8860721803195,-5.83438513675449,25
230.4,294.919,102.239,581.655,-2.49865,89.0238,2172.88,286.572,44.6864,146.837,1366.42,-9.58286971413567,-33.9818550678257,18
49.5808,658.387,331.894,99.1629,-45.3199,-78.3915,117.494,2039.44,1279.35,17.8811,12057.1,0.955674161140658,29.4773438315387,2
299.814,633.087,195.749,3905.56,-266.627,130.124,-66.8978,137.535,4.21809,163.407,2977.79,-13.2262688009931,-2.57303790126346,23
170.114,222.658,490.07,17.297,41.1315,-31.1067,10.3457,2169.95,466.802,869.07,16962.6,13.152052462831,31.0161069434559,14
38.0254,196.752,108.952,78.3193,42.4952,70.8562,806.922,224.188,16.2563,1059.91,2619.47,-15.8710401714415,-1.928695328991,7
71.7916,1619.64,1088.43,146.98,18.5027,-67.2438,-143.637,1813.8,1747.2,124.748,14348.6,4.34415620326383,24.3348875356097,14
43.3623,1352.18,1134.35,25.772,62.6548,-44.3717,-30.6708,2268.25,1062.97,222.121,18785.9,17.695229081249,26.044171605255,14
219.114,217.08,1038.5,783.476,12.2663,153.939,-149.388,597.885,107.676,131.365,-5.01897,-31.9973305499771,13.1441217040832,28
412.844,896.634,847.247,1493.65,81.4122,-68.5645,-561.503,1651.55,-25.6458,375.541,18209.2,18.4598207538134,33.5717796806238,14
50.4486,194.902,3.07723,738.16,40.9615,149.85,1031.38,1460.75,-316.392,177.707,187.588,-25.394439234775,-20.4576712578446,28
127.842,262.832,705.393,227.865,88.5473,4.83077,-211.323,1892.66,326.031,1361.82,7075.68,-6.13956475482198,29.7903595707854,2
166.976,237.249,206.876,748.473,35.0493,189.013,326.641,2295.38,-57.4544,139.816,876.745,-36.3915407127499,-2.69488837325039,28
866.056,5833.69,1304.53,907.744,-158.28,516.801,1126.45,4004.44,1918.34,985.648,1346.85,-3.2764492178853,9.70743794088145,27
101.729,871.18,718.442,14.3714,159.817,-56.8976,187.436,1181.77,904.631,899.327,19537.8,19.6379637255055,24.9443479843442,14
147.149,151.606,31.9764,765.87,-68.0329,67.3641,2003.65,521.646,232.295,35408.5,-701.26,17.857740389899,-23.3773386946294,3
96.1922,186.336,79.0628,2801.62,-82.7571,74.1908,126.098,1098.48,86.6094,30.2827,421.613,-29.9140801408873,1.95604981734757,16
269.245,354.304,133.995,999.663,-18.7085,97.7364,2333.54,387.086,-250.619,508.021,2174.81,-7.37798125239592,-34.3891147796959,18
74.4691,359.531,29.8661,756.581,43.9792,335.383,-118.699,416.616,-20.0917,87.7237,125.05,-26.8030039198293,13.8134624691029,16
156.334,168.2,622.173,26.7287,39.6649,72.7186,-381.059,1867.78,1040.37,482.991,10953.6,-1.09654231354274,33.7318161641189,2
60.3683,672.224,1572.51,196.475,58.452,36.2519,-14.4965,2112.65,1426.05,1296.42,10493.5,-1.62597604230916,31.8538782321737,2
3228.88,317.225,20.6538,746.446,74.6219,578.332,1263.08,906.636,282.344,7525.05,5.12817,7.95202573288822,-7.91725526479419,25
224.607,283.373,189.299,278.315,15.8307,340.196,753.399,401.085,1801.15,225.262,2012.33,-21.7386830934097,-5.90233610400135,19
57.6075,419.991,521.032,877.899,-171.058,16.2103,-603.813,1933.8,233.324,90.7091,16371.7,12.4204368445205,37.3352305490817,14
83.479,714.706,983.481,76.939,17.3882,-2.65734,135.079,1899.67,781.617,735.66,13629.8,4.8968165504805,30.202233781272,2
636.657,1257.97,992.105,852.894,30.0472,407.756,278.85,2221.97,153.497,192.24,16694.4,10.497332962191,25.971257237416,14
8.97735,1113.01,861.305,103.009,21.6939,-43.2606,176.412,2193.9,946.855,9.28778,16227.1,13.9701204290266,28.6008180590077,14
489.221,296.563,45.5462,559.398,20.133,178.877,1011.06,659.751,285.624,148.572,1903.24,-13.1778981069929,-13.2859105693434,25
49.7975,128.56,913.245,193.202,44.8541,-79.207,-300.99,1754.54,151.168,730.334,18006.5,15.6208197447778,31.7887912652775,14
96.269,657.768,1360.32,252.323,-0.388757,-82.1337,1083.9,1882.93,1457.82,2291,14629.1,9.56216026185965,18.8227556936094,2
44.1342,201.804,293.811,1144.16,81.1585,102.372,1376.25,1332.38,175.165,139.008,212.566,-19.9597411648857,-24.226992840221,28
85.6382,337.098,284.788,1655.05,-137.625,-15.5393,3049.62,1093.93,-5.55723,4869.83,300.1,7.73721328063665,-33.5444266367201,17
330.636,387.033,46.3893,1150.26,13.9924,464.458,1601.96,430.559,35.5598,160.627,429.441,-15.2604695623899,-25.4369890104256,18
83.7297,330.961,780.683,104.009,126.15,-5.54389,1133.78,1911.08,556.099,1187.81,14286.1,9.8095146361993,19.5837565816795,2
45.2663,329.872,771.84,-63.4755,104.334,-32.5697,42.5293,2003.93,1176.06,1046.61,15929.3,9.98807731808196,31.2208116247575,14
211.17,230.503,18.2136,821.592,-38.6662,136.1,3737.44,638.365,60.3521,158.215,1009.58,4.42497727668438,-39.2195004581119,21
158.781,225.806,123.376,588.664,83.5029,671.723,4947.63,23.1306,115.776,9.34101,93.3264,11.3128972345344,-37.5453649806771,11
79.6395,406.757,744.172,141.194,27.602,6.36569,-72.6842,1802.11,331.341,2223.6,8666.98,-4.0604242618784,30.1806259670026,2
89.4724,1886.22,1057.87,48018.9,175.521,-164.242,4443.47,1626.58,-734.809,600.822,14290.3,6.07062656170416,-20.4262783383985,24
258.412,1014.14,483.449,592.002,-51.6544,-69.1657,387.296,2154.28,356.35,351.552,20018.2,20.0349681448287,23.722672645774,14
123.727,234.571,157.365,562.945,97.4881,524.626,3022.57,873.56,16.94,96.8666,172.134,-3.40907728289692,-39.1041588370183,21
292.402,1366.43,1242.67,618.365,-1.61408,-58.316,105.981,2035.65,244.302,367.044,21849.4,23.9558526252185,23.2501677337419,14
101.399,799.795,895.313,378.871,-2.9402,8.69773,-391.788,1851.83,242.381,707.62,11885.1,1.02901483792997,32.5870793140768,14
1583.11,442.595,1155.4,1772.53,74.8713,-57.012,396.841,1571.79,386.996,239.086,24901.3,18.5120252687097,1.27971367530532,25
108.603,343.498,75.2818,881.284,108.895,146.065,847.904,204.146,279.758,100.727,129.066,-19.4399247172777,-9.6179847734742,18
702.418,2766.33,125.709,607.797,-64.3647,1079.44,3253.16,276.996,-169.09,273.56,290.763,-2.95592360351192,-36.2944890338922,11
53.189,542.802,1134.61,185.191,58.8459,-168.29,655.254,1901.58,1252.29,64.5128,15757.8,10.7547390379475,25.1982721382842,14
61.6525,1531.37,622.416,94.5669,-14.9746,25.9537,523.961,1668.84,1628.91,230.992,13024.2,1.69963792885743,21.4377867375931,2
150.219,1369.23,1209.7,584.09,-94.8999,-122.225,-271.244,2434.77,409.591,179.819,17185.4,14.6383549580586,29.1834249452179,14
142.399,198.743,109.19,-25.2361,51.1099,181.808,1913.77,820.926,1035.5,129.204,267.483,-13.7521400985571,-30.3237624135349,21
54.6743,536.456,524.827,156.539,30.5976,-14.0197,1675.75,1403.32,2952.89,3994.12,13040.3,9.89423382194027,2.53221089623713,13
361.553,2963.46,604.728,652.69,-52.1934,176.361,503.012,2230.43,328.599,36.232,14982.8,2.31714095424488,18.127513632729,27
200.366,2702.35,51.8212,611.734,35.7744,158.68,923.57,98.3124,184.881,140.644,3951.31,-1.97257987655434,13.7094205344765,4
223.557,1550.78,933.749,2390.49,82.4598,5.88725,-449.608,1494.16,180.346,372.871,13970.3,4.72361972294487,31.4695564206639,23
205.231,187.986,33.8263,1415.58,16.3128,163.405,2607.59,511.032,-169.907,267.038,2346.14,-5.71437859574062,-35.7480572689074,21
119.706,617.713,915.433,1705.62,-196.81,53.3153,-1502.17,823.473,-169.119,196.401,11584,-4.17997863276651,35.2610387078974,2
84.478,623.552,975.583,55.6717,36.4437,150.115,-606.768,2172.93,935.278,974.756,18303.5,17.320209660672,33.6907992527477,14
147.524,240.178,178.506,942.648,32.8478,165.301,720.772,2138.25,208.491,148.424,154.33,-33.6254776122985,-13.479525138399,28
19.9827,139.913,183.892,620.221,-52.9816,91.2669,208.635,310.534,288.019,74.6352,-45.1482,-25.6647474586068,8.75772397370322,16
385.508,154.822,82.4447,44.3509,62.7725,300.09,913.749,394.665,688.036,1046.8,9542.32,5.03810292743633,6.02426869639975,7
31.617,372.75,70.1385,850.906,-33.7604,139.809,3313.75,352.112,-141.718,99.5305,1740.06,0.572312547981783,-40.07821049136,21
143.074,356.895,217.483,317.371,1.61609,152.532,2719.28,1366.18,830.015,1452.45,995.565,-6.20238141652345,-38.9942667586105,21
87.4319,318.039,111.198,1937.8,-131.571,394.25,286.746,214.606,95.2421,161.461,241.472,-25.9326835123484,5.86040851411887,16
267.146,335.902,66.796,1408.65,-154.148,206.122,1216.67,659.469,-158.796,34.0055,2267.01,-18.8460221020946,-22.2833306465567,18
203.945,213.941,18.8313,1593.92,31.1004,395.45,2406.68,1035.49,975.432,7935.07,-762.31,9.91239451307517,-28.062020089431,17
213.433,143.47,140.779,728.514,76.3729,759.652,3964.66,1559.13,183.353,239.296,364.589,4.91694630065856,-40.5296278697164,21
116.626,153.461,74.8726,773.059,78.7911,163.434,326.11,2521.9,-29.2648,208.005,974.679,-35.7117058414101,-1.96461174745471,28
914.761,623.713,206.586,735.669,-16.5301,792.569,345.765,380.843,613.21,639.407,1474.23,-5.61186696836658,-5.09935572129737,25
97.3469,310.445,-7.52317,584.89,-114.844,1470.64,1290.1,753.042,279.431,196.058,343.362,-20.6930516945339,-22.903343486976,18
158.341,286.105,138.742,619.824,68.1765,445.089,3239.63,2062.08,132.456,125.14,43.1647,-3.50158220387168,-40.88535247413,21
120.563,345.858,311.801,592.172,-184.51,720.143,3723.98,1423.56,390.124,-20.778,3443.93,2.85003073682905,-42.4190769798655,10
1285.58,511.924,255.084,-16.0295,69.3892,77.0109,1587.43,2324.55,2302.91,197.287,113.695,-4.33058999952276,-15.0915739766122,25
89.5293,244.491,-5.81341,100.072,106.854,-0.692257,7705.48,574.914,886.739,2523.52,8172.53,16.0373294236739,-35.7055218881896,11
245.885,212.878,97.0181,3385.36,-147.013,63.2346,315.554,767.898,-25.758,-30.2416,670.143,-13.8875986950092,-10.3356677513365,23
656.283,1260.4,479.849,1523.37,-115.111,-59.822,-634.362,1234.44,-185.169,247.4,7174.07,-2.66969993592636,14.2976409857541,20
9.79123,518.41,336.02,1182.34,-57.701,-210.482,341.106,661.25,687.26,926.903,14638.2,7.48663133352296,29.5324405216722,20
209.911,182.161,390.238,363.422,-54.3031,200.43,613.031,775.921,239.834,858.398,1263.31,-22.9544145461521,-4.36260657683408,21
194.742,374.394,-16.67,2123.15,133.972,-301.911,1147.38,1117.63,229.705,30635.7,-2682.16,18.334771836984,-23.559691957481,5
4.11146,280.612,50.5029,1076.67,-67.5294,189.851,66.2465,2138.87,250.34,-39.7296,1335.08,-40.0298303389344,4.31680089016527,28
135.939,2295.25,1105.4,165.69,28.1963,-132.515,-127.02,1715.59,468.664,1915.06,19499.1,13.3007585534881,20.4680096620328,14
1028.27,330.392,272.564,875.742,-114.414,600.995,1805.72,817.403,611.424,104.224,1361.3,-2.67510058346421,-21.7178943052884,25
78.0017,214.363,13.7809,638.175,-54.0085,91.1096,-32.87,173.947,413.336,86.6842,931.896,-27.4065023536528,13.387578730924,16
88.9696,998.608,1448.45,980.402,-132.201,-104.128,694.972,1884.36,244.789,155.469,18463.7,15.816773500172,21.6392706909874,14
165.773,332.828,948.048,1009.89,-56.1301,21.6458,1053.05,2134.67,659.155,489.959,11576.2,5.15469289317355,22.5989707690946,2
136.54,732.652,849.761,184.467,47.8857,-144.74,341.048,1951.12,244.869,6439.46,20983.4,18.1351526675314,4.66247794436176,13
302.003,401.191,109.728,2616.02,-72.5822,356.642,580.662,138.705,26.7166,293.051,557.547,-12.5784644194184,-8.62100423294657,23
75.8395,446.136,301.975,101.379,-54.5283,-21.2243,185.526,1406.14,1695.52,3418.86,14288.9,3.49591544363072,25.3959768147177,13
205.117,378.481,822.361,59.3668,-56.3383,-29.6014,98.4806,1549.6,814.979,843.489,15329.4,7.83190272459314,31.6589763853766,2
62.6027,680.53,809.96,44.7365,-66.2901,-98.7569,-653.716,1571.56,531.947,1413.13,16725.2,11.7168215511933,33.4796763402178,14
111.252,207.889,48.3379,63.5796,-35.9571,885.84,6221.89,188.001,1358.1,107.206,360.665,13.5168731769016,-38.9774450052792,11
563.544,957.763,223.168,1369.04,-3.86728,243.612,1329.46,1691.1,280.496,297.584,6824.83,-4.99964141787215,-10.5931409892759,25
80.0603,314.924,398.954,950.395,-118.442,-31.7239,154.341,2957.4,8.32095,107.848,15072.3,8.60338300392026,33.7506485831261,14
146.849,1092.33,555.271,31.3855,109.872,-139.631,793.7,2707.18,568.412,1144.12,16839.8,12.242121421362,23.7584238315266,14
190.033,195.823,42.485,4158.03,-357.515,404.163,1643.55,1036.74,146.883,1768.97,617.24,-6.15750514521776,-32.6591270439155,23
44.3448,244.813,597.026,19.6182,-45.1813,-179.332,433.383,2561.36,1677.51,1921.89,15791.1,8.25434361066676,28.6643008232145,13
285.518,994.892,607.136,636.586,84.1577,600.154,15.6458,1592.46,424.713,594.789,16431.2,11.5875343622876,28.4697091496684,14
81.858,158.414,349.62,611.015,-76.6369,193.246,155.145,729.211,55.3334,115.991,898.37,-27.7277769646292,9.98872931104082,16
211.72,807.879,907.808,-33.1747,36.0366,-13.793,58.7318,1623.24,836.758,795.023,9546.43,-3.00503632493842,27.8913922948361,2
556.427,717.567,68.205,306.784,17.3112,1185.43,631.383,2185.43,236.931,829.273,597.882,-19.6136526230218,-3.98611570822177,25
147.119,920.52,537.902,1861.58,-16.2414,184.382,382.372,1601.41,322.337,187.601,11808.7,2.71265481809219,30.5527787005195,14
97.6756,331.19,668.682,51.6218,-13.0321,-7.95281,187.634,2244.95,2952.32,-24.5705,10246.7,-2.61657714266086,27.1311733978422,15
121.621,197.458,362.075,82.2294,30.6059,-138.694,114.542,1178.16,1011.17,214.371,7884.75,-8.93528339682261,29.5907681872154,2
222.993,455.403,775.526,1528.26,-109.319,174.373,3620.97,1598.91,42.6262,126.709,6289.15,6.95881159288882,-36.2916375017018,10
290.823,415.566,715.706,565.731,39.5157,-170.583,798.038,1640.02,57.859,95.3987,17072.6,14.6282647143045,19.3845088392131,14
77.8388,900.638,456.698,-12.7817,113.684,-92.405,243,2027.02,5394.57,176.973,14894.4,2.17809635762403,17.4624733545255,15
293.292,686.539,1043.62,1031.89,-106.925,47.0454,535.912,1776.12,268.007,79.1981,17123.3,14.2867667518978,24.7816185392907,14
149.628,664.372,1135.41,1775.83,63.962,-9.81924,-27.6358,2519.33,409.264,280.945,16012.7,13.5533764151172,35.376638241334,14
92.8937,581.617,370.242,19.6211,25.9222,-201.064,-139.958,1348.39,72.7842,769.051,17703.8,15.5375043105339,30.6949039055402,14
92.3213,1350.26,849.555,93.6518,-18.4048,0.390176,-480.096,2186.89,1169.78,91.9137,14384.7,0.826680737916308,32.233330182539,14
481.559,621.088,240.857,858.314,-64.4453,482.467,699.894,981.836,295.059,131.066,523.817,-16.4946896454901,-9.35556137336285,25
248.131,262.168,303.795,238.721,205.138,1194.25,42.7073,877.535,3910.29,4781.31,495.754,4.64925314880092,-11.1140538950083,17
208.806,1256.66,879.853,204.105,-4.82461,-110.807,352.585,2194.89,1073.96,1221.79,13940.9,3.49612960338889,24.2741670530242,2
145.928,1431.02,1348.61,1195.89,-147.171,-73.2567,-246.356,2110.38,367.813,-69.3663,17322.3,15.7274818618625,29.9479252193099,14
92.4794,158.516,64.5219,213.184,-18.3372,800.598,103.396,3730.66,940.368,67.3503,1371.8,-29.4150572331706,10.5743643846756,28
192.993,336.244,86.5805,755.362,40.3862,186.609,5428.06,98.3269,224.228,162.964,5628.91,13.6793189103765,-35.941528727911,11
36.0929,155.132,104.937,884.346,-11.6835,187.711,28.9032,171.936,206.478,95.8906,1638.32,-26.0956496355413,13.3372280454457,16
258.418,171.395,70.5202,3439.85,-67.6746,21.3839,2662.11,947.973,265.94,7322.33,620.122,11.8709182538887,-28.0817230526931,17
-56.2883,151.14,55.1272,929.766,27.6845,116.951,1303.33,1.0593,293.171,-24.098,12479.5,14.7009343454665,4.15461864750519,6
114.111,311.872,49.9897,620.139,53.0979,307.386,2487.78,1651.62,249.395,363.991,46.1468,-9.79106264653585,-36.8100050249819,21
157.343,299.168,44.357,628.659,-2.33576,234.926,1607.46,160.001,193.599,89.3916,131.884,-14.5958516698461,-25.5261006508471,18
161.093,314.144,18.0169,6011.57,-285.451,975.732,2712.92,1117.91,2085.57,5970.33,260.662,8.95762544109833,-27.663514551945,17
127.658,306.982,496.555,625.251,-153.46,-23.7844,959.941,1817.02,292.853,-4.62582,19799.2,16.8692781315465,14.8804404797581,14
99.7923,324.867,167.834,721.602,37.5668,93.2801,-298.062,1316.83,2.48248,214.141,643.764,-40.0407280197967,11.9579099555777,28
21.3297,275.178,69.726,504.155,57.4351,405.071,2009.76,720.852,218.472,5293.78,-176.591,5.58326050358977,-25.9404759634848,17
405.171,253.19,104.381,200.572,-2.96062,244.863,3344.96,264.461,114.349,4105.3,-427.337,5.25575746378315,-34.2732039971299,17
74.4177,512.046,668.37,56.2227,85.9579,10.2314,-347.86,1581.09,-135.839,780.656,15677.4,10.0144516469537,32.6217870210774,14
245.153,963.119,163.73,620.056,-2.81168,68.4742,-66.1526,1559.3,-82.7037,120.915,11420.5,0.662269985202996,28.8890513421293,2
484.399,808.581,85.7268,1150.39,-27.7174,37.8211,973.89,298.717,108.657,129.919,12952.3,11.5861184342432,5.34499171980472,20
205.931,1058.58,1386.53,173.622,56.5618,168.889,567.064,2674.29,939.422,424.647,9265.51,-0.59333035342655,25.4590709030477,2
55.1529,492.308,1335.62,597.45,984.378,-523.41,1115.93,950.35,133273,2383.7,15187.8,-0.725138234765445,2.46222490681821,15
233.184,928.481,599.727,701.744,118.059,1.99458,73.9025,2133.73,577.988,19.586,9080.75,-1.6022255903778,27.7351832985509,2
215.397,357.03,111.27,670.737,-13.6775,188.121,2545.72,1813.32,340.851,201.49,119.173,-9.31607840548071,-37.6642681227798,21
186.431,1366.06,630.455,269.277,73.061,98.7825,343.115,2700.09,918.697,253.412,17407.5,12.631960191258,24.5248043175134,14
69.956,182.376,104.805,49.0131,29.9563,754.977,5478.3,669.569,249.701,756.266,1102.5,12.616198315132,-38.3308585684846,11
102.681,292.671,46.2454,707.907,9.52738,59.081,386.701,215.411,-118.328,18.1039,2847.18,-26.1333716114777,0.153476873132698,16
100.283,643.619,294.67,378.469,-24.6973,59.6877,2617.82,2689.54,1116.18,-72.6093,8191.07,-1.80260134960523,-27.9184821682343,21
125.772,243.923,61.2981,653.934,24.7229,326.086,1937.15,1222.19,155.688,237.533,256.356,-14.2900808796958,-31.7428979135349,21
858.137,1026.52,1289.89,2119.26,0.58069,-7.32913,265.774,1590.33,-8.6421,288.977,13670,7.76414529981331,11.5839447243413,14
238.607,342.197,143.051,122.426,6.77665,103.563,6440.8,-34.7809,4366.15,5186.82,17681.2,16.4577983628792,-28.9768789837188,10
175.637,426.45,158.207,841.39,24.3685,86.9532,366.359,247.05,-51.702,3928.91,1089.03,0.919050722873268,-12.2992633294811,17
384.828,1455.32,870.676,678.608,3.98698,-77.3073,-531.99,1973.39,230.022,355.791,18341.9,15.3424462422971,29.3044642908208,14
193.841,341.592,692.942,153.374,96.1315,3824.23,-162.186,3011.92,355.247,772.45,14619.7,6.86635410661097,34.0801430324707,14
197.57,287.001,412.688,123.994,-25.3449,165.501,3125.58,2509.21,620.888,1710.8,393.318,-3.48281641526294,-39.9827822284358,21
134.366,200.635,3.52759,1712.57,-59.0077,1342.08,4921.3,834.792,-2.06577,3221.24,-25.6309,11.4605226217878,-35.93930208274,17
1315.07,1961.93,427.539,3080.38,-139.206,786.311,419.739,633.076,239.995,97.8931,2493.44,-2.93979287122742,-6.9500051688231,25
454.048,1437.7,895.417,1755.94,-138.746,1667.68,-1127.83,3081.1,435.425,610.305,21615.4,23.1591090638912,33.2073792846782,14
172.823,1459.25,319.646,179.269,-52.5735,148.465,511.69,2662.07,1188.14,357.073,9165.87,-1.39511452873025,21.1901330878053,2
102.358,275.333,-11.3374,583.788,28.5561,873.607,1985.8,1167.58,54.8247,314.988,99.3689,-13.5877272840012,-32.1444747109318,21
372.057,157.515,43.3573,650.534,-29.851,82.9792,1411.71,623.329,-39.0582,21.4529,219.916,-17.2773345191059,-23.0742417339582,18
254.691,542.056,23.7846,1715.51,-89.0759,359.78,1692.35,703.873,78.8079,234.529,898.582,-15.8394168137949,-28.6443281460456,18
291.876,228.066,562.752,852.598,5.68687,-109.676,3666.05,1914.61,596.519,139.86,15641,23.5289457762578,-3.1788220176903,10
156.347,244.834,-19.9164,4.83455,10.2338,249.362,26.9815,1957.86,42.4783,1556.33,911.986,-38.5468387859308,2.07458399653581,19
31.3811,809.379,1166.05,104.561,23.4868,-55.6976,338.393,2529.52,722.235,1378.46,18027.6,16.6196218621105,26.5290500305195,14
235.427,271.092,78.4807,929.626,-66.5937,489.022,933.664,1114.32,-18.1535,4322.23,247.262,1.63645729545632,-17.2283793750177,17
-22.2538,546.916,769.356,111.429,-5.05937,-16.9141,-419.342,2558.02,160.111,2140.93,11828.2,0.290179450162216,29.6552864831529,2
788.867,780.532,64.7021,1557.76,-106.649,673.979,2532.13,2241.23,790.565,751.691,1302.9,-7.67581887762283,-35.8432294952227,25
424.774,247.059,121.182,1253.16,-231.175,731.856,2738.76,373.717,-113.493,162.064,399.203,-3.94073201282393,-36.8978147999668,21
277,524.633,10.1512,1554.99,-136.92,149.128,2.53266,332.488,189.995,110.053,2041.07,-26.8180956952436,14.5001383186851,16
89.6903,1370.07,1164.99,149.305,-36.0177,-129.171,-189.632,2490.84,1461.35,1801.47,24072.8,27.7169642922807,23.8233759509872,14
172.516,228.064,82.9708,45.1699,28.8202,269.39,3183.04,308.818,235.771,763.469,2604.85,0.887584174550712,-38.8462057092607,6
324.093,50.3863,-40.5031,419.305,-308.5,531.623,2843.84,876.042,55873.2,622.218,-771.183,-2.3381932940609,4.23286680135698,15
61.3794,141.596,152.674,596.317,62.4922,202.158,757.932,716.057,374.984,58.4487,-61.4216,-25.5394588540497,-9.95214978909948,28
133.115,588.469,559.481,-60.6685,28.0766,-112.637,106.003,1720.76,1263.74,168.125,23048,25.5498988071705,22.3668147628482,14
42.2928,235.813,167.621,2176.71,54.5769,131.664,28.0663,197.442,-23.6322,183.563,-135.251,-26.0115064252731,8.24691144757847,16
95.732,192.621,176.279,122.669,87.6989,1326.44,6156.13,1946.98,3325.04,2996.35,711.355,13.3442131458399,-38.3323378709451,11
232.593,317.143,714.675,145.797,81.4832,49.7103,317.021,2004.27,980.367,825.865,4618.64,-26.2750848739294,14.6698954555036,19
278.256,186.116,271.421,118.84,-57.9528,210.216,683.867,1054.19,242.12,906.239,486.736,-25.0432803900696,-12.1409503280901,21
57.7699,337.556,116.946,7.43525,148.527,360.711,1943.96,209.975,591.05,721.471,3215.99,-7.1361999604623,-28.8096023864563,6
328.894,824.99,446.689,1940.5,136.323,-139.949,507.403,1476.49,-22.9793,269.474,11493.5,3.24915515225886,26.9869364963434,14
10.9427,1269.32,173.487,24.2808,177.274,184.642,1206.18,319.378,579.557,839.607,544.686,-13.5411979668247,-10.7566857333944,4
442.73,612.566,732.188,52.8236,105.001,13.5009,290.754,2006.8,2086.64,348.241,11659.5,0.44009449387544,26.0243447638592,2
52.1696,605.149,975.074,1640.51,-118.607,-101.095,-366.766,2145.52,47.8863,228.603,17975,17.1825396379379,35.0754332864522,14
12.3274,264.466,-55.5931,96.5242,-31.8104,826.524,23.1756,3474.83,1220.25,254.474,5137.26,-10.2478069587118,30.7985567704539,2
6.21055,181.4,383.288,785.474,-68.6547,-0.160215,-123.964,732.035,114.06,2.05505,8720.41,-9.92813131955332,30.2232693247388,2
96.0493,2100.19,742.041,110.714,52.2022,18.003,-157.585,2660.86,505.848,972.33,16941.6,8.38599580865998,23.4702855597042,14
117.601,1862.91,613.306,58.7233,43.2404,19.9789,-9.87453,1868.69,906.388,-57.6305,10034.4,0.258597830095639,19.4131486442297,14
1492.64,344.994,58.6781,810.535,-61.3985,33.7888,1666.91,288.187,213.811,102.558,8092.55,9.04851276328941,-5.84397728385346,25
52.5025,219.418,85.0037,1202.04,-11.0244,100.797,400.837,619.067,-106.839,168.609,1969.22,-25.7038163432426,4.21922146404975,16
460.309,380.1,86.0234,2330.3,-182.968,203.717,2629.13,845.105,84.4947,114.642,363.859,-5.80466304020058,-35.5234782590144,21
91.9547,168.056,108.223,51.1949,-20.1894,153.493,1258.59,273.498,50.5027,747.073,75.2695,-16.0657150481967,-17.2519961369232,12
116.94,211.869,158.959,778.128,-35.1564,238.712,-230.846,2576.05,264.201,164.35,1541.95,-36.2701043732558,12.1361866191355,28
118.956,264.988,350.68,729.386,13.0305,136.847,366.988,2174.22,367.18,116.268,1774.36,-40.8040202277362,-2.43697655370951,28
192.154,228.779,45.9977,1243.04,-155.824,-827.714,1775.24,1742.45,2532.62,59778.6,-2067.92,18.9408220403088,-22.7556044474595,3
192.491,242.82,33.0579,591.199,4.45218,157.985,1783.53,537.382,37.5007,299.934,-215.405,-13.6310018846219,-28.5095490537282,18
947.359,330.604,74.4164,1160.75,2.60878,105.828,4159.3,744.488,-304.1,526.502,4196.83,8.07170018597366,-35.1890513270811,9
30.398,686.123,936.063,75.2452,113.136,-80.8621,-276.728,2371.02,608.231,767.963,21175.3,25.1054286042688,28.3239212561775,14
125.366,183.191,48.1047,1037.61,-6.33582,1501.6,2349.1,909.329,-64.3491,282.67,18.025,-9.85538763644388,-35.431502021791,21
173.734,196.328,91.8709,118.9,15.2496,75.3803,370.388,-25.1339,1945.99,93.127,3936.33,-16.1799503092415,11.6652535698061,19
2760.02,544.043,524.769,3874.81,-256.444,95.202,2060.65,1867.52,215.942,138.527,3701.38,4.37144038330415,-10.7809622426364,25
193.423,240.36,111.461,1176.96,-163.881,158.239,2269.2,205.446,391.299,95.2345,8290.27,0.654583282131536,-24.1259277179365,6
2031.71,290.913,190.761,631.277,-53.3739,972.056,4066.67,434.139,-13.0604,148.251,689.869,8.28143283744743,-32.1018011140163,9
9.55126,248.314,1400.23,4.78953,34.6194,-160.902,473.301,1699.4,419.841,749.568,16845,12.2111565498994,27.2348962958461,2
239.757,221.282,79.1939,565.031,-43.6012,299.659,5084.8,2099.32,68.4505,278.01,585.321,10.1337388329246,-40.9954384744029,11
92.1574,908.002,1278.59,109.678,39.097,109.778,371.129,2003,713.312,769.787,13455.7,5.45971812310933,27.4905002456325,2
137.634,169.676,-442.144,-496.83,-1463.11,-12.1634,2430.72,1102.34,66467.9,2152.44,-808.524,-1.59970099108138,4.79690096307628,15
98.103,202.785,29.2273,215.375,39.3057,405.039,2028.73,667.323,885.846,89.5975,86.1137,-12.3261487346825,-32.2924592500112,21
373.622,369.63,96.2777,7501.82,-204.258,1089.11,2242.5,1401.2,344.825,164.466,-6.53452,4.81470137641585,-30.1713160571867,23
114.782,1951.12,475.517,52.0322,7.19198,115.488,1195.99,1866.34,17931.5,28775.8,27151.7,20.0543756381603,-14.8272617273342,5
96.5225,396.651,1674.99,639.918,-11.2157,30.3041,-113.277,2664.16,471.806,180.288,12690.2,4.25345259441191,37.856133489765,2
396.163,641.008,851.427,561.146,45.3669,13.7978,367.2,1894.64,37.6107,522.783,19244.7,18.54469481258,24.9576477605789,14
96.5815,103.815,70.3633,629.503,-17.5127,232.211,298.728,1012.58,162.7,-103.635,282.466,-33.6697601999451,2.69936648091817,28
180.142,995.66,797.786,48.7446,109.394,-26.2714,-428.53,1816.46,1107.02,860.235,16266.3,9.93719613589742,30.8039637537574,14
54.1526,159.3,59.3318,84.1996,0.453478,327.212,1576.65,531.594,202.873,2509.21,-591.639,-11.622329781579,-22.089951078308,17
87.9973,435.659,34.8517,1061.41,36.579,414.121,1679.28,813.58,130.386,5555.99,-249.918,6.01806196894349,-23.4150943575146,17
130.307,147.907,112.469,90.3458,86.3379,97.5892,3413.43,1302.83,666.631,922.045,659.08,0.667039508766399,-40.3956017320466,21
76.4852,4197.55,43.8021,218.592,-64.842,1653.95,385.979,3834.27,5521.32,12419,931.439,11.1733697629697,-11.8623135476387,17
38.7208,302.232,153.733,1811.75,-33.9654,447.232,2303.07,1071.17,139.746,134.645,112.884,-11.6282448933732,-36.4879686174156,21
233.202,309.299,39.8449,312.703,-29.9991,225.736,1296.22,158.186,666.727,1144.78,17508.3,17.5067407790926,5.49671617480118,20
239.843,206.757,271.26,54.4001,158.022,220.585,-180.143,1997.17,644.699,900.124,17175,13.0082030992479,31.0522763916675,14
29.0991,216.307,-39.4063,135.463,-72.4269,958.18,6987.26,2189.1,3629.9,84.587,278.885,14.9996233991291,-40.7132348052622,11
108.677,576.326,991.611,204.646,-10.7239,-64.1292,249.963,2502.94,463.82,965.131,17548.4,15.3045727297744,28.3132408218102,14
214.32,313.926,157.083,268.503,10.2574,715.832,1795.32,454.41,450.988,1124.61,10619.7,8.18833444144395,-5.50566251703455,6
186.544,288.959,303.743,1125.02,-145.114,125.581,947.545,1567.87,105.635,448.351,1374.67,-24.4742666299078,-18.9373009363309,28
1384.63,872.282,35.6158,940.309,97.6811,112.114,-139.365,195.531,238.477,-2.49882,506.926,-1.06945401726104,-4.19093304418777,25
132.208,189.919,54.356,1130.44,28.9012,121.542,6471.98,639.084,-119.116,386.12,129.679,14.2104677513603,-39.2953177894502,11
214.661,336.268,165.769,316.799,25.9545,151.972,527.245,511.357,822.788,932.916,2293.9,-20.0228772194585,2.18381832922289,19
64.7562,162.781,200.249,68.1714,32.0087,153.557,398.188,1619.83,269.505,773.93,1572.22,-38.6436254496452,-3.15019351688898,19
96.5285,471.052,402.746,568.436,14.1761,40.2259,122.953,1547.95,77.1891,13.9487,13928.7,7.05488110911309,31.5631392469833,14
129.308,4674.3,470.003,742.47,-28.0954,-6.63778,-30.2006,2367.26,-169.72,129.974,5712.45,2.33121738017039,11.041889786139,27
155.798,2034.19,675.566,414.059,-14.607,-140.999,-241.15,2125.45,827.694,1466.61,16470.8,6.86079935233883,24.1938903915656,14
67.4978,188.159,213.403,665.557,142.404,384.601,2498.77,724.169,47.9288,257.738,343.29,-7.75309247857272,-35.4465356864952,21
763.463,578.696,187.387,2028.55,6.50402,222.194,1103.84,2327.33,266.459,-5.35994,1378.51,-8.80194632537361,-14.4901651245421,25
441.694,10451.1,364.205,1135.94,166.791,246.01,167.82,2891.09,147.098,82.325,5157.18,3.0936322923114,11.7311213792626,27
489.397,214.353,94.9382,832.886,-14.0882,167.078,105.271,272.864,325.246,89.4306,785.51,-12.4553116391609,-3.03248330090623,25
157.373,360.174,76.8145,320.78,18.0635,1288,1000.07,1597.98,1067.16,456.146,1075.28,-25.2418786446258,-16.1623575291949,19
766.181,383.652,184.923,12070.9,-863.62,402.226,1544.64,782.268,-162.716,6352.03,544.263,6.86152769168554,-26.8765924833948,24
556.472,762.612,283.833,1381.58,70.836,281.963,-57.9748,906.476,264.118,389.182,1966.14,-17.8431157153436,-1.50248022829406,25
359.766,933.477,1019.97,976.714,12.3724,-62.2819,770.82,2478.1,530.133,416.784,14208.9,7.70069274476227,25.1612804414669,2
173.255,754.037,1162.57,185.16,22.2496,-87.8762,-88.4719,2603,404.588,849.034,10382.1,-0.716159642441613,32.6201927058737,2
108.062,759.687,1047.28,111.167,48.5117,-40.4009,577.182,2465.62,1089.51,1114.96,15590.7,9.50734566182123,26.1561457968979,14
113.898,857.33,1560.15,745.282,-76.5756,-130.184,-183.872,2584.97,234.242,271.67,17639.2,17.0647556254051,31.7782952017544,14
79.5256,159.08,85.8356,850.372,54.917,273.656,455.469,306.373,-66.3208,154.497,523.579,-23.3631388920626,1.56396918725983,18
144.29,355.932,118.167,1807.29,-65.4954,124.74,297.335,1383.17,-85.6609,246.467,770.559,-33.7310799892645,-0.784504806647355,28
242.278,2334.63,1359.31,717.382,-86.494,-65.0824,-220.406,2417.51,208.242,0.166794,17033.6,8.13289519339678,22.7483454143777,14
238.166,738.387,127.46,764.552,-74.8529,792.037,3231.03,780.353,-113.366,94.4601,409.136,-0.562763510586509,-39.7224497470495,21
103.767,3126.17,54.0478,121.673,298.378,1735.41,-27.2038,3438.13,883.61,-85.0027,2185.54,-1.62106615840355,9.96182097900698,28
74.4857,930.957,1233.89,5525.26,-250.684,95.2439,1000.72,1583.79,195.123,18.4249,12113.9,10.8301296671052,13.1726768315207,23
610.769,711.505,287.329,1500.15,-109.254,716.634,-54.0931,1092.54,252.519,364.437,882.151,-19.1642187941379,-3.94368982577045,25
61.7751,262.532,137.482,160.959,27.5203,140.509,2316.54,866.527,1828.12,908.288,1055.56,-10.0874921908897,-36.6975900239807,21
29.6266,1233.85,600.514,68.7271,66.4475,-85.5935,-182.321,2218.67,464.258,740.738,22026.6,26.7391771293488,25.9601695306879,14
68.1929,524.664,534.099,-44.632,2.79778,-112.59,-132.448,2151.67,1006.24,494.297,21112.6,23.508288755657,27.1620131712351,14
177.103,332.505,248.2,1027.42,53.3327,14.1695,-354.86,942.888,0.456694,59.7105,7348.88,-12.7130773600017,28.5706321250477,2
86.8718,181.096,439.553,577.453,12.7451,89.8851,57.1509,1021.62,10.5543,210.021,3929.28,-21.2100206324461,21.7766405043194,28
533.951,1637.92,769.099,603.142,-0.608863,646.975,345.209,2019.64,976.622,415.329,9178.97,-1.91397343429439,20.4148071205812,2
151.316,1180.94,1302.61,-28.6596,56.1917,-53.6594,235.704,2395.88,1185.11,1646.28,16612.6,11.1184285162732,26.6273428585087,14
179.229,215.587,78.6344,3263.62,-159.462,721.058,918.395,1355.13,445.23,63.6193,644.87,-21.006000199438,-20.3812677339637,23
306.636,376.056,219.932,2546.71,63.964,86.2794,973.85,20.6382,340.535,68.0992,4054.07,-8.79931841282627,-10.9692974906383,23
66.1475,312.615,807.875,122.221,-71.6231,-119.069,1101.93,2381.56,619.177,1007.32,21153.2,17.0583187343478,16.6955517632583,14
169.015,433.362,775.221,661.82,-8.06751,-120.45,-399.753,2238.91,-238.501,311.984,17290.9,15.4101637193734,34.9205810808728,14
497.113,519.44,867.209,826.146,84.6957,120.259,279.926,2173.57,375.121,319.536,11133.9,0.22006540630244,29.8974756426751,14
84.344,1107.31,1169.47,-21.0038,22.0143,10.0887,962.613,1834.56,3797.62,5461.17,16781.6,13.9723195930318,-9.15385620985521,13
97.0703,1383.96,578.172,54.7793,52.5484,-19.1132,129.822,2510.79,68.1849,903.563,11593,2.46328466510721,26.3939991731384,2
71.0522,421.433,548.172,92.3549,61.5711,-84.8894,197.888,1961.23,1060.29,268.712,13215.6,3.97608661678129,30.4818498571211,2
96.5086,571.516,870.557,633.979,-71.3787,29.8651,-241.952,1576.32,324.338,561.338,24665.4,28.1992798612528,23.8531471847842,1
45.3707,953.052,690.022,92.3361,42.0327,-113.445,123.53,1351.67,977.534,1300.56,26381.8,30.1278285003805,18.1185622658553,1
611.338,842.072,59.6888,1443.13,-150.942,201.769,-22.9751,463.003,303.472,-156.944,961.479,-11.9738626770174,-1.2964051333317,16
74.2491,494.522,914.532,-8.43818,55.8973,-119.936,261.049,1832.37,-408.657,738.189,16618.2,12.9243666740885,28.695203161821,14
109.202,326.692,1932.88,-78.6497,37.0855,-107.651,262.86,2832.36,900.819,262.543,13938.3,7.06555379645845,32.7043190267387,14
74.0261,136.833,100.407,576.264,20.049,521.196,976.964,908.674,199.529,58.8038,516.559,-23.0350936629483,-18.1719484762002,18
79.9699,326.827,136.866,607.148,58.777,495.455,1078.61,1535.27,-120.905,197.363,8942.92,2.99948961697786,16.4473095640869,2
333.162,122.201,9.20181,844.359,29.9833,5.94004,1314.56,1070.96,168.842,141.047,555.831,-18.836389784944,-22.2821157569853,18
6465.13,1394.44,611.84,17983.7,-15.366,1377.19,519.657,1541.15,-118.465,313.757,2623.05,7.90027970530801,-3.87520591981365,25
118.333,200.464,469.926,133.091,102.299,-19.3042,654.615,1464.87,1232.06,354.577,6643.13,-12.1040526765069,19.8205605448445,2
-34.4303,151.644,62.6098,-103.957,-70.7118,513.419,4570.53,950.667,3245.01,396.638,2604.78,7.39040121667675,-40.6020874455206,10
173.907,410.849,784.679,-70.1112,28.5629,510.646,379.227,2386.06,1683.51,984.444,12870.4,1.75155883892634,29.5176954131671,2
234.341,552.09,551.536,689.402,-52.7447,-23.8292,530.678,3181.62,-266.435,49.5742,19419.9,17.6359488667121,22.904386317707,14
129.228,320.161,255.312,22.9792,5.46229,139.45,223.152,1360.82,1999.54,3929.11,863.259,-2.23738778406926,-2.68152313915516,17
314.784,543.127,57.8902,666.671,21.8691,857.153,2246.79,952.557,111.552,275.394,67.7457,-11.2730106042732,-34.3963760588753,21
135.467,214.393,111.834,654.877,-67.8103,346.184,812.35,422.89,300.749,-107.352,1253.9,-21.2864055543991,-9.91149213715931,18
1777.35,1237.2,1313.18,1644.76,-146.825,-33.451,-723.028,1909.08,-148.826,190.9,14050.9,4.41122516703892,-1.02105870050193,25
147.351,1222.6,1641.64,4963.5,-31.068,-156.761,860.88,2273.3,213.658,283.177,22336.5,19.0844846389592,18.1699472050227,14
183.225,255.301,150.175,718.976,112.32,83.9272,-193.877,2334.4,-25.5481,438.873,492.308,-43.136060458063,4.11270191381585,28
568.495,494.177,147.196,643.085,98.9331,453.917,2680.75,99.1867,219.431,82.6462,315.085,-3.33147235306286,-35.2893643621266,9
33.954,6241.58,352.9,-50.8214,33.3837,15.1294,59.7773,2260.15,912.643,302.597,10357.8,3.89349883608573,9.79215405505964,27
581.349,1628.54,206.685,1388.49,59.8734,516.237,882.512,2738.55,55.3418,489.949,693.456,-7.3622421999203,-5.34155385981765,28
161.314,1597.56,100.035,1.98893,18.2414,2049.12,159.541,3417.29,3421.25,302.941,-170.022,-8.53380695178122,3.12222997061405,28
210.35,1165.97,1488.1,608.702,-77.7697,-145.573,823.113,2385.26,43.8201,140.548,16309.6,12.39414569277,21.2316240666543,14
1.64818,259.457,323.795,676.468,-151.379,230.447,1763.71,2823.92,176.646,21.1608,1939.19,-19.0899657026636,-27.173573439216,21
172.883,565.011,220.815,-38.4484,77.2898,336.813,3825.9,1393.05,1118.99,258.076,58.5339,3.00908719370627,-41.6333772568216,21
150.544,244.19,132.03,607.254,-6.6439,241.816,-286.277,807.439,267.276,3.98498,1355.64,-34.2284233621413,14.1082235905003,28
468.597,1310.63,637.318,2066.11,-16.6942,106.133,-284.619,2265.74,-92.5896,528.517,13747.6,4.62373447156025,32.930073478929,14
80.6839,240.797,104.95,75.8284,114.939,106.863,1507.46,799.048,250.663,4652.68,968.73,1.39964107618156,-20.7342927092082,17
94.8271,162.045,81.432,2437.33,198.086,311.374,1761.56,219.875,373.466,82.494,502.356,-14.2125029152393,-26.8791186463929,18
300.791,150.104,80.0976,564.522,-24.6271,107.725,1581.12,816.886,338.678,1.00793,2316.73,-15.8549505945801,-27.7263871802817,18
507.629,353.06,73.5886,781.103,-106.376,561.838,2838.23,1639.91,210.245,194.839,1345.12,-5.04184042902021,-38.2796180559322,21
108.189,349.448,430.707,165.161,-70.313,329.946,1206.11,1840.62,972.528,908.149,1562.66,-25.0308694426057,-20.5124228887627,21
49.159,1079.35,1143.88,98.4508,20.3673,7.72333,201.908,1961.58,1472.94,1270.93,6002.58,-8.09476213387862,22.2293539726992,2
197.83,486.352,58.4763,885.142,-112.25,322.379,-83.2546,1642.23,44.6402,23.7917,2300.28,-31.4213123948968,15.6600197546312,28
30.2238,1172.77,695.261,72.6795,10.1775,3.38298,-399.607,2292.96,1893.8,902.051,13770.7,0.541347886969204,31.7886195880832,14
12.1758,517.045,377.182,1185.77,78.5772,-15.911,345.378,1566.79,273.259,847.146,15910.3,12.7863110909409,25.0590781877741,14
52.7132,255.816,57.1738,975.848,36.6283,548.687,280.136,806.88,89.5063,6.38111,125.489,-30.6266248444733,4.15325992208911,28
160.625,1341.02,1366.86,-42.5051,92.9399,-110.432,395.356,2223.04,320.945,2827,26186.5,27.5628602657647,15.7358300031299,13
174.772,324.33,158.692,1083.82,132.751,138.767,1823.59,578.845,77.3199,104.148,725.658,-13.1217817864204,-29.578312032578,18
497.146,144.009,103.137,488.978,93.2181,1063.23,1715.02,608.203,-34.4479,1729.92,-241.953,-11.8669552093686,-23.7659879560668,6
95.0098,138.043,1603.38,226.864,45.1011,-71.6676,664.24,2040.2,2932.68,6137.95,12913.2,10.7356224660984,-3.44714049707525,13
70.2525,258.433,45.9672,768.178,19.4183,112.531,150.346,939.248,316.494,73.5628,74.0059,-37.7036518767873,4.75752213103052,28
121.068,242.554,16.5309,1133.99,-42.5886,523.868,547.885,807.5,34.7025,73.976,239.053,-27.7058055574466,-4.91856802344717,28
647.837,175.39,22.2687,164.208,-22.9611,624.879,540.814,343.737,489.475,975.685,577.311,-7.21680548486076,-4.62138983776757,25
35.5314,300.668,479.346,-1.72874,27.6932,-66.1346,-73.8952,1171.49,986,589.508,13404,5.48914240487018,30.5973788255642,2
111.391,467.947,585.391,63.5734,8.15056,-123.464,305.117,2344.56,1086.37,2437.08,10526.9,-2.80580234814294,30.8309311804217,2
296.736,153.137,217.171,70.8591,6.42958,142.442,159.671,1382.04,1151.05,79.3593,361.858,-38.1729977186517,1.92845469623042,25
162.316,241.941,88.3873,648.463,-30.9076,148.056,1111.66,530.579,194.029,16.1207,450.491,-19.7049970949571,-18.2514224375723,18
-17.4247,592.128,2075.32,62.7027,26.31,-110.179,634.61,2491.88,1251.49,3055.86,15731.1,11.1626321531844,25.4894380232529,13
362.623,1051.1,774.151,302.778,-66.464,-29.0677,-42.1734,2437.15,1156.19,551.659,12357,1.96833936417902,28.0721621598502,2
353.8,2228.61,694.215,888.036,-128.495,-180.124,-380.094,965.416,97.5831,78.2731,26243.3,28.8754190597605,19.2375431256017,1
63.2902,122.633,55.3218,652.543,-8.00218,541.785,307.978,151.862,-89.3883,295.482,1347.99,-26.2200373825702,9.17860749004848,16
319.438,178.435,74.3783,912.491,27.4988,167.648,730.187,245.63,191.697,206.822,1227.1,-16.83969575507,-7.53940150511901,18
193.569,818.223,819.19,137.911,92.5112,-190.429,1433.36,2296.82,1865.21,521.151,25404.9,24.3557969666283,11.6617674843822,14
390.301,278.347,5.826,567.318,30.4982,-26.4816,1913.95,48.4253,137.655,21.7956,10682.4,10.6548027028639,-4.84970622373165,6
523.675,761.684,87.428,1890,-163.419,334.835,-552.068,127.197,228.04,178.766,1100.6,-21.2404072518703,2.11116340646677,16
273.965,2028.87,447.489,2942.73,-354.539,830.186,260.913,1790.58,77.9552,464.38,10592.9,-2.1535929794128,25.7953472702055,14
64.8839,1439.74,961.669,24.6999,38.154,235.217,445.838,2599.54,913.109,807.973,12465.1,3.27711214933631,24.6041899951007,2
120.496,130.827,115.408,-50.4729,58.968,526.617,766.876,1028.75,73.6123,1961.95,1669.85,-17.5821273723977,-6.90542475359243,17
93.6383,306.092,69.6839,918.03,252.378,339.395,-222.38,2669.96,-200.895,171.85,1101.49,-40.6830710454894,5.2993069697612,28
26.8012,380.656,234.92,121.307,-5.71132,133.911,2803.28,1108.03,319.804,965.666,5430.6,-4.77126343895276,-39.8700921229609,6
86.3279,336.094,418.935,59.2829,-32.114,91.1813,2390.35,1464.23,829.117,916.691,6644.04,-8.746946634234,-38.4842537124926,6
87.8893,199.469,383.641,613.056,-257.625,-12.8096,-104.51,2146.27,-266.311,205.005,10061,-3.51026978001781,34.158244917614,2
36.654,106.538,34.3124,29.647,102.285,131.099,1397.54,2511.1,1712.7,3112.32,7677.58,-5.74856407274673,-3.88040904446543,2
2541.52,1929.18,1165.45,2984.93,-118.296,43.8876,-1233.77,2573.13,438.67,280.728,15006,3.18292702084049,-3.53433728435658,25
54.1025,416.118,530.214,78.207,-57.4579,-149.996,189.771,1613.04,452.331,1396,21417.7,21.5969666130104,23.9984951976099,14
-14.0445,174.985,298.954,70.3172,32.311,154.489,2005.04,1313.02,1319.84,-29.5116,13068,16.7520889720286,5.23701700092897,20
210.418,902.795,1153.05,131.675,125.444,-49.2018,-167.377,2492.92,359.14,928.41,16591.7,13.0470230408413,30.9701023859134,14
89.3127,271.718,99.5308,576.609,-52.2769,288.747,1184.84,308.954,76.4452,161.117,254.909,-17.9399203068727,-17.598408453202,18
147.826,321.874,1177.51,555.147,15.8371,-18.0482,-64.2841,3152.39,55.3227,56.6846,19341.7,19.2108014262347,29.6141685444486,14
192.63,244.403,112.224,56.8273,-0.0464178,75.7152,2723.25,186.401,42.1019,3208.14,5121.68,2.39585434630846,-30.9305227626542,17
313.227,339.889,289.125,578.353,-9.07015,197.487,515.492,468.107,-13.9565,143.523,1570.91,-19.2479249797229,-0.949027445359262,16
476.243,1447.96,626.754,679.613,-25.0812,689.148,12.1377,1850.05,2881.4,3019.23,10209.5,-2.34851130342132,22.7554968155421,13
39.507,1316.59,534.34,567.508,-93.5305,-173.353,-376.583,1117.31,244.732,424.877,18785.9,17.9797131998469,28.8861579926156,14
131.282,283.012,1082.19,-73.6531,67.5389,27.1571,162.528,2484.06,926.778,1334.56,13041.7,2.65343438612387,32.9069455039398,2
307.563,1496.2,426.879,724.996,108.525,-121.208,620.357,2010.18,451.169,82.9761,24618.3,25.3890344821462,15.9726514335557,14
-11.6424,159.532,143.926,2.44075,15.1468,306.101,2202.05,1574.46,742.375,1214.57,-25.8813,-12.7293521533493,-33.5900260198468,21
129.766,497.213,87.1859,662.936,-189.17,113.659,-31.3486,1476.61,164.786,135.425,6511.85,-11.3236488137212,28.7123523452886,2
77.2769,238.552,182.63,25.0186,82.9503,671.713,3807.3,1153.9,493.142,932.493,3180.72,3.58350010090629,-41.8925150738949,10
305.868,226.597,61.6482,2139.37,33.7768,412.449,654.896,764.088,96.353,142.717,319.91,-18.8548698724006,-13.6240667208074,23
450.615,598.985,248.218,1199.4,-189.609,359.84,2551.5,1616.11,186.106,175.951,743.949,-7.8398392398408,-37.4212267535524,21
597.91,1781.22,385.156,1231.55,8.4096,394.989,-260.933,1634.79,176.187,96.52,17744.4,9.75362007949692,26.1585550854632,14
475.982,946.278,748.593,106.555,75.64,-61.3161,216.623,1928.63,487.954,847.317,21577.6,21.7101710603025,22.9705285294244,14
236.777,205.234,92.9436,1081.06,-17.3356,351.685,150.201,58.0695,277.159,-91.0551,1840.67,-23.24307071808,9.38379800071974,16
68.211,970.925,974.673,300.707,36.1482,694.882,-38.5252,1871.16,1712.51,1545.23,15545.6,7.87833197937403,30.4889716598554,14
14.7108,251.247,80.9557,26.4869,101.495,967.67,5510.54,2100.01,583.335,976.623,-38.9894,11.9264014733216,-40.3474276547273,11
131.158,1029.82,1084.26,629.063,22.6278,-66.8852,538.587,2477.22,194.639,-53.3831,22200.6,22.8301610541729,19.2113300944308,14
117.14,183.516,6.27162,995.541,28.7759,379.792,3026.56,1226.84,156.822,90.6494,26.5002,-4.31102930605033,-39.527421514662,21
181.8,853.203,475.538,291.951,-24.4618,-11.2441,308.117,1414.18,766.54,967.158,11651.2,0.89285069968498,27.7461974323463,2
135.388,358.492,72.6508,762.99,108.648,146.596,217.457,289.87,15.9029,4.05077,605.376,-27.5331911195578,7.62109748969201,16
37.7321,2975.94,535.645,2087.65,-378.556,-80.0519,-537.303,1475.6,-55.4766,217.412,18920.8,9.74909905137793,23.3905036374279,14
45.4911,235.199,69.176,939.286,-7.74624,89.064,-398.284,16.0723,134.805,191.014,3751.89,-23.103659506329,20.0378965020517,16
90.9692,4530.1,-38.7971,150.575,58.8099,2638.62,-9.98369,3071.28,854.445,1277.52,3922.07,2.42226978194606,10.6438781371559,27
168.688,648.902,525.466,589.024,-2.78453,107.418,432.099,1685.23,-17.3202,224.438,10319.2,-0.444890512638137,28.3761405654347,14
115.551,223.621,85.3007,944.57,9.81074,100.635,2531.69,312.176,-28.4584,79.262,5609.01,-3.75697680382493,-34.5330015800614,6
74.8472,282.733,99.2539,53.6246,42.7513,65.8275,3828.78,-26.5415,960.401,1028.2,16738.7,24.1350949628201,-5.40698468563223,10
144.462,914.406,893.302,83.0403,-29.9678,-3.23644,587.552,1493.72,1020.47,935.53,17167,12.540967459798,24.048460451037,14
130.225,265.743,149.613,38.4271,108.84,440.338,770.988,812.318,904.51,1230.47,1193.67,-21.495863040507,-7.1730598561003,21
64.5376,2608.52,866.777,-43.8465,182.952,440.186,24.3423,2057.25,882.959,187.233,12825.1,2.38871398457471,16.9556574049496,27
58.0514,179.171,676.406,15.1103,37.5259,-10.6731,2764.64,1502.74,183.174,901.117,12410.8,16.8709910808466,-4.45077070207679,20
80.4445,207.153,45.0149,1920.42,48.2974,651.433,3065.03,1237.86,669.416,1495.02,11.732,-2.31308260448885,-36.9636783965048,21
50.5797,4554.05,874.798,122.066,51.5237,-82.6422,342.308,2109.92,440.397,916.437,17829.3,2.47560707913495,14.8244150380624,27
-24.3946,3422.71,1212.78,552.568,9.08757,-241.484,510.346,1442.19,-98.3189,389.946,24214.4,18.7759073857205,14.1374280017945,14
190.682,217.485,15.9601,1024.99,3.49143,145.915,786.612,252.747,-91.8406,373.088,411.686,-18.4300752846027,-8.43134915700513,18
122.469,168.159,565.618,94.5768,-21.4077,7.64302,368.966,1412.23,1835,2561.57,24906.9,25.4988559923241,16.3104506921617,14
225.981,3148.52,634.29,1453.29,-146.664,61.6062,162.579,2069.83,127.601,-119.084,9505.46,-1.11254438690976,15.1323366349446,27
322.102,254.2,209.241,797.757,-83.0787,119.125,23.1033,949.532,-24.0822,285.375,640.249,-28.4747487085769,5.76986972007843,28
97.091,424.607,-72.5706,1253.47,30.9668,379.207,39.2711,2798.26,65.6629,-12.8981,473.994,-40.8717284030683,1.33240633627245,28
307.699,1125.07,1223.75,575.287,37.3895,1155.18,346.843,2431.68,267.696,363.073,12968.9,4.85683345050433,27.8909557891686,2
185.716,266.388,-19.0932,39.5188,12.2242,117.139,1696.71,766.316,234.997,1340.8,-162.968,-13.8969722501816,-26.0518475795421,21
146.073,734.428,671.298,24.292,35.0838,-69.5125,646.067,2148.73,898.422,696.652,20017.8,18.4974803394621,21.0513952152143,14
183.87,2473.88,1214.07,165.502,72.1858,-79.9427,467.98,2883.5,887.293,1164.36,12762.9,1.44309167953252,19.9300583733753,27
15.2389,746.339,867.008,32.4425,-26.228,-51.4,155.356,1468.2,4423,391.986,16375.1,7.48354165999538,23.6301306288071,15
31.9806,273.771,753.648,131.979,5.36222,-96.819,-494.773,1683.12,1286.12,2657.25,19337.5,17.6168072909338,29.8482628692814,13
-90.6815,208.515,331.383,93.3101,9.594,73.6468,1759.26,1802.52,673.254,725.041,3872.91,-18.0069062355491,-30.8892574778851,21
-58.0766,913.179,575.82,922.137,-21.5988,1.19595,600.347,1213.75,78.4006,330.369,12520.9,8.01710909122928,22.5596325613422,14
68.0026,138.536,115.251,40.7699,-17.3979,731.225,3248.11,1003.61,193.028,3104.86,-333.008,0.738936754292156,-33.149291123751,21
114.404,400.079,265.832,158.886,-36.0349,-6.59573,1363.4,1071.92,1567.32,1210.56,9973.57,4.0121050391572,6.87354515968578,6
219.119,108.04,145.775,242.164,246.73,41.5432,2570.62,-141.067,4588.35,111.737,4031,-2.3408987291419,-25.280712298356,15
154.668,290.205,97.1588,823.721,21.7234,383.617,846.643,1226.55,321.232,-35.9267,7900.41,-1.38864533811946,18.4441737426664,2
108.68,255.01,1230.42,105.106,143.092,-135.06,1635.31,2313.99,14118.9,34116.9,18880.1,19.1885218979037,-23.4266805094313,5
89.9597,248.307,191.036,203.098,-75.148,138.457,101.17,521.285,1193.12,-79.1804,280.963,-31.3828669918852,7.95822387185022,19
292.329,1047.71,809.493,1161.81,-208.736,-2.85823,-438.916,1322.08,239.903,249.975,14764.1,5.90700776214676,33.9164783482127,14
121.4,329.989,396.565,632.088,185.231,58.5559,185.842,1006.6,95.9507,313.934,10873.4,-3.24834608294265,29.5757493283014,14
235.82,274.967,64.526,558.173,-58.208,44.5616,5524.3,209.184,315.971,326.203,10018.1,14.1668850399211,-36.808337957573,10
172.103,994.137,1177.9,655.149,3.8432,-89.9481,-48.7702,1198.06,186.42,-26.1387,9697.18,-2.62604500413788,28.5608309151633,2
144.31,229.69,1120.63,123.158,21.0387,3.6004,-110.812,2410.91,1164.87,120.242,14937.9,7.56319604125108,35.2345592602012,14
490.243,1034.27,1098.84,1494.39,17.4473,1279.62,435.617,2551.39,1205.78,322.829,19401.3,16.0638664549667,25.0986251534696,14
51.3648,207.235,141.28,556.622,71.7522,1468.85,9048.58,1248.13,-118.879,210.307,890.7,17.4892034014644,-39.8694134358788,11
142.976,440.97,426.117,961.9,-19.9221,-95.3887,137.125,1189.79,330.954,141.369,14749.9,8.39690368044787,32.3204373580531,14
624.92,512.34,24.4857,31.0033,94.2179,703.19,1341.06,536.133,164.809,5546.86,-83.6638,3.25683166506328,-18.9618045861318,17
294.337,2212.39,584.494,703.776,-43.3886,-104.101,274.743,2297.7,256.094,75.4632,24343.1,25.0937032602694,16.7248092342797,14
-56.9408,237.755,682.846,630.268,0.626893,81.9498,464.538,1755.43,177.688,-189.192,9493.92,-1.72322856551416,31.4525089506531,14
83.093,205.496,248.476,791.944,4.58918,488.896,903.576,2194.98,102.235,126.982,2498.5,-27.9448882923345,-12.8280359355522,28
165.586,261.426,816.496,577.269,-55.0385,52.8809,-147.738,2219.46,386.285,297.13,12717.5,2.5573107964054,36.3402801863113,2
245.275,371.111,39.8372,829.635,69.6742,171.936,2809.57,2448.29,-26.9864,132.568,3707.96,-6.80348909597795,-37.484757134678,21
258.663,1572.84,848.387,568.543,-88.2567,91.8233,-124.417,2008.08,185.13,181.395,6502.23,-3.57037526705234,22.3117841181771,2
168.71,1055.63,580.422,81.5157,132.842,-12.8051,-172.268,1272.3,953.056,1103.68,18962.2,17.4142076811015,27.7788475557098,14
187.545,2040.19,412.54,675.24,-17.9633,-148.616,-435.254,2377,79.9356,-0.20899,19883.7,24.6115164816094,28.9372717367834,14
56.0107,946.488,504.245,-76.996,17.3118,-41.6336,-109.376,1700.76,7189.95,207.17,8307.77,-3.31309508126055,7.20856047227984,15
1077.12,1756.04,419.704,751.887,-79.9003,154.696,377.995,685.805,492.945,153.602,5451.95,-0.112248356803331,-0.728549917209457,25
119.259,3154.9,745.246,834.814,-85.7372,-5.32657,-190.034,2220.62,70.9154,30.2742,20024.5,10.6882241985697,17.5373421331706,27
137.568,187.082,223.891,605.769,-57.6014,879.184,1145.76,1074.65,281.737,2.97045,305.133,-23.3585134206666,-22.2595041661265,18
206.613,240.76,257.927,-18.0768,33.8359,-28.4191,2146.68,752.94,1417.14,58.1625,16276.2,17.7501483977293,2.3235721240005,20
151.792,800.059,1225.19,683.156,27.3618,-30.5122,-12.4212,2566.84,209.024,223.025,10912.1,1.14915807028363,32.8248017079141,2
106.623,307.937,94.8769,869.097,75.7426,140.908,5299.53,187.362,130.898,74.656,1521.39,12.7467627622826,-37.3310919753118,11
257.944,806.67,44.0057,709.397,-14.9893,372.519,1215.61,53.531,-21.5316,20.1505,308.345,-15.0771354115869,-17.5983847417998,18
45.6714,1530.88,822.526,-32.4763,22.7119,-98.8613,5.19656,1863.84,122.791,752.878,13335.7,4.20660958101205,24.4774601364515,14
55.4514,1582.38,490.822,97.1968,48.0724,-247.434,16.4946,1316.29,-106.459,17065.6,3683.2,14.4845557368785,-15.5366798494114,5
125.579,691.297,764.678,820.677,-30.7609,-16.0979,-348.437,2430.94,108.868,243.016,7965.22,-4.56434153081675,32.4964711526941,2
-76.1231,1065.96,668.551,96.1005,24.004,-166.28,-516.463,2608.43,1156.05,1709.51,25390.8,32.0181819985426,23.7556794472612,14
133.394,449.612,1051.73,16.6884,-36.6186,-100.979,365.068,2018.44,2652.44,453.29,19876.8,20.296240955373,21.7134944194289,15
209.869,263.666,24.0906,158.874,64.2726,400.852,3110.38,834.522,511.107,1091.38,1832.69,-0.821891107963712,-38.7078797108595,6
115.943,432.843,156.226,1094.24,-65.9847,691.056,5364.13,1874.27,129.762,341.636,452.778,12.0090192897279,-39.7555242392766,11
-15.426,316.39,556.852,76.1739,26.4117,-186.369,98.1986,1608.78,897.557,137.631,15912.6,10.7119316384935,31.5815891582152,2
29.5228,211.208,975.055,86.9586,166.845,-52.3786,184.549,2082.48,400.808,928.021,12866.3,4.24962101540538,32.2010763004325,2
115.719,5476.74,1237.1,1356.44,-250.942,14.623,153.137,2421.19,803.547,-62.4284,13142.7,4.08458770875254,14.05976562797,27
352.948,204.281,106.331,79.6873,-12.6396,-69.8469,6278.34,620.406,1871.81,165.874,12386.9,16.3059880040814,-33.6336724916299,10
397.187,96.5571,97.8023,863.391,-2.40269,176.683,3321.01,145.553,-24.0394,145.422,-33.0918,-1.52532921884937,-37.9119487335685,21
49.8886,6299.18,537.869,-10.5554,2.60332,-192.394,461.08,1440.08,1049.73,1513.82,25092.2,5.34129032795718,13.2339633225651,27
226.669,2892.11,864.102,118.436,-39.0865,269.107,-331.381,2744.46,712.079,861.422,21574.9,14.2477817001776,19.0103489976194,14
236.038,413.68,1463.88,998.601,-101.47,-30.9141,230.889,3141.21,477.614,362.206,20001.6,18.7930810837339,25.5026513351625,14
84.6356,169.331,115.122,97.3597,16.5026,223.24,351.449,888.058,167.294,3552.21,-190.182,-2.82468220856226,-4.96931689212226,17
210.695,275.174,812.594,848.184,21.7132,-126.421,394.499,3280.67,127.109,318.935,16101.2,11.614180965851,30.2740898633904,14
1318.92,1070.7,1161.17,1307.14,123.906,-38.7194,144.163,2882.82,95.3148,531.419,11603,4.67233682460727,2.06294231992335,14
206.447,560.315,363.555,1984.73,-119.758,24.5945,-121.013,3581.22,-97.1414,142.846,17503,15.8950753287416,34.2858031287955,14
204.636,472.647,1153.7,652.648,-55.2361,-12.1076,-256.55,2122.63,-23.357,59.1062,12612.5,2.98309728187546,36.7539109504857,2
172.276,450.745,1095.11,192.221,67.0086,-70.5687,587.954,2383.63,1359.1,272.256,17168.6,13.8159778026937,24.8759551148448,14
50.2848,241.124,14.365,103.771,96.6378,1089.19,3839.3,2160.86,-68.9008,755.369,-66.4346,2.43748491001726,-41.5712445796713,21
76.8962,1225.44,860.622,842.46,-69.3343,-12.6372,576.633,1628.97,-203.517,159.427,12048.6,4.98897068579378,24.0670782339092,14
846.463,228.567,97.7857,780.534,23.3184,67.6193,1578.6,933.086,65.0664,344.017,72.6985,-5.52905182140792,-17.4290533219329,25
86.1554,2015.33,992.994,1690.37,-64.0902,-62.5672,112.051,2002.64,127.533,17.3795,23406.3,25.7422341595356,20.9566329638899,14
114.689,1000.4,703.499,219.847,73.7827,-72.9465,297.391,1430.12,438.821,889.422,18285.9,16.7661936525757,25.8241530078658,14
306.317,550.681,359.933,702.691,4.96004,443.517,5905.49,1099.09,180.85,225.181,440.879,14.0854108614368,-37.902084962343,11
5646.13,870.1,261.864,6632.16,-552.466,647.041,3112.24,1002.6,261.98,219.079,5053.88,7.83432118473305,-4.10079357122609,25
157.764,292.559,334.521,1022.78,175.829,334.187,1938.76,1643.18,231.05,142.383,237.693,-14.6191363247336,-31.8454035525639,21
2687.46,404.305,708.78,561.104,3.40584,-208.52,722.066,2707.2,73.6047,70.0926,23644.6,10.6039651857628,-5.05941211314766,25
368.008,121.814,115.69,609.335,-315.301,513.068,-707.698,203.154,-166.089,165.53,1581.28,-17.274728533014,11.1759253643577,16
86.0139,594.576,1651.96,-122.568,34.265,-65.6351,477.657,1972.27,1420.39,1173.43,17983.2,15.5837407348524,25.4637380061748,14
22.6969,4038.64,2238.25,-39.5782,25.961,-33.2833,418.834,2661.22,751.281,1080.66,26063.2,18.938474320147,15.0598404360922,14
60.0222,119.342,146.509,75.5382,-27.8758,83.574,1629.35,3743.43,423.364,1015.83,298.539,-20.6877747766757,-18.8869237707331,21
739.172,297.266,67.9981,2684.19,-212.891,196.195,1112.49,221.147,35.2144,148.922,237.962,-9.08405347421072,-15.1139700178277,25
93.363,323.752,337.633,592.808,58.6363,166.4,3630.72,619.77,153.206,11.3319,2090.43,3.46288177007143,-40.5636721847822,21
143.942,740.183,89.4243,913.977,-119.717,134.094,150.195,838.4,-180.843,295.683,1382.05,-30.126185872417,13.9134779594554,16
-28.4528,2163.58,1607.9,-83.0467,50.2984,39.6015,46.4905,2638.81,1693.27,85.6996,9741.25,-0.396037729371617,17.8899222882609,2
126.018,324.16,716.112,1066.89,-101.295,142.378,898.403,1927.16,411.559,72.5735,3569.79,-24.2401427518028,-9.21358509595495,28
228.183,1859.21,1060.71,295.134,-27.8377,-125.616,467.552,2094.38,2027.1,1089.75,24082.5,23.9487320713433,17.1363391819013,14
632.379,1377.12,953.698,2552.78,-87.5092,-105.103,1453.64,2621.7,2958.21,1100.6,16861.7,14.8001667867768,12.3412418364422,2
140.491,270.078,153.228,-12.276,116.293,1175.94,1005.1,779.602,919.781,443.118,86.279,-20.512727727438,-14.7083251869354,19
138.296,217.38,33.7971,1813.99,110.656,151.612,823.689,388.304,485.423,496.397,261.847,-20.4906413387092,-10.9012678192996,18
201.788,203.522,129.442,573.023,-50.2742,92.989,1183.85,420.652,101.632,253.488,-63.0544,-18.4984149786578,-17.5778829387493,18
560.021,774.398,1582.94,593.372,-11.2569,155.25,-665.362,2631.51,18.5009,65.9149,5151.53,-0.799854912761576,14.3233922242682,25
163.349,255.62,124.243,-4.56959,-41.633,-248.886,220.259,1430.69,6470.38,20276,-1127.1,15.2134240274025,-18.6333179386714,5
104.655,414.343,1468.49,283.053,199.453,20.6481,702.108,2987.52,3900.49,4239.78,14389.1,6.57532786068813,16.9279597907016,13
75.1172,2095.95,1725.78,-61.503,68.0175,52.5339,856.18,2405.96,666.112,800.359,18045.3,12.1497992082266,20.0272898529727,14
748.841,229.85,81.7782,709.98,14.8601,55.3141,232.067,1743.14,-222.185,364.993,1785.22,-4.91737444516381,-6.23038813904054,25
4309.06,263.631,38.6723,3516.59,-206.636,405.814,1188.69,388.969,100.891,6573.6,-10.8576,7.61047710082147,-6.24180066618211,25
184.946,323.031,44.6707,477.968,120.153,356.634,43.9837,1855.44,933.393,103.391,361.712,-44.65733515225,0.0999554642825071,19
98.3487,496.868,822.751,550.382,-66.7554,-97.884,734.089,2333.02,184.664,94.8731,23775.3,22.5031328858484,16.4429660122953,14
60.5434,626.344,607.471,86.7428,90.0341,-24.4012,71.4896,1496.59,2575.83,152.846,17737.8,13.3903382554731,26.9996299175949,14
634.076,377.04,188.076,323.166,31.4626,156.018,1566.62,1363.58,484.512,2929.53,542.759,-10.995104673574,-21.9179799686414,25
34.0068,2395.07,1026.35,250.665,110.067,100.893,307.437,2578.1,4342.23,4351.35,12093.3,-0.455463852993626,18.3208393920969,13
343.981,175.848,19.2017,1974.55,256.325,-181.07,5082.56,1526.05,-51.7619,49107.1,-3249.27,17.8038448358864,-20.8081236442327,3
834.701,320.025,1408.73,599.986,84.4402,-208.631,339.188,2518.56,93.4381,199.487,24478.7,24.1750242371666,11.3954154497247,1
28.8836,221.618,89.1237,8.10562,45.6505,180.733,3939.72,2634.33,1083.12,180.344,305.167,2.52989896247335,-43.3740853811512,21
43.3579,784.914,1127.46,168.035,-66.688,-94.2765,331.202,1817.48,1506.36,244.404,12807.5,2.82251863799105,27.7654423228563,2
72.7153,216.946,30.3486,160.821,-3.36281,81.2514,197.578,50.5883,646.892,784.998,2155.12,-19.6670730819275,10.3551088559874,7
88.9246,546.521,811.326,209.326,60.4532,52.0534,-56.0233,2770.07,504.442,912.546,2461.87,-28.6365290617532,14.3053692572115,28
49.5825,396.095,56.8834,554.581,-64.6534,546.722,1651.46,791.329,81.5842,136.59,622.337,-16.6603515015579,-28.327995131373,21
59.1766,225.164,5.87045,64.1449,43.4354,185.896,1681.03,2589.59,1009.28,105.15,3455.93,-18.7187328324881,-26.0393463748548,21
240.952,251.733,62.2691,576.245,6.02999,1141.92,3177.33,1034.25,-66.1398,184.797,-139.699,-1.69557805556429,-39.3700280260964,21
374.854,1087.9,664.811,1158.31,-134.251,1327.57,-212.316,2126.1,351.431,665.455,15420,10.2842702843162,27.7298304552814,14
83.7286,318.507,604.865,623.256,31.0398,-32.4032,267.418,1453.09,-20.9729,122.846,14023.4,7.95521335529323,32.0389039151294,14
136.773,445.652,1205.28,70.2358,-33.2023,-75.7236,177.646,1690.14,2607.34,2775.56,9316.23,-3.08921990170813,27.1249605950174,2
19.463,239.922,22.7462,573.932,32.3586,132.76,663.047,296.907,5.72355,118.605,306.485,-22.5235730329773,-3.36003566895758,18
155.534,173.752,571.296,21.8253,30.3083,73.6806,4032.01,1590,1216.68,2027.27,3236.35,6.18156967513068,-38.8880430951113,21
81.5508,464.994,-99.7394,8830.63,-173.462,953.454,1908.07,2002.91,115.456,27383,-681.968,14.5169978057586,-19.839171726167,24
167.056,1753.04,1274.87,118.245,14.6009,-37.1775,16.8717,2041.06,1284.76,312.093,12794.3,2.31576603396793,22.5901348818468,14
28.3731,1798.98,1101.16,-35.7355,-6.97908,4.1596,136.761,2600.38,1018.05,1029.3,6815.36,-2.1121131519856,19.1036188075841,2
144.137,2732.65,544.465,107.355,140.083,-4.82166,768.772,1327.19,954.445,1237.81,16981.2,4.18537718285517,18.0776194223277,27
115.649,2078.6,986.857,238.194,-3.5234,-87.5343,-124.665,1778.46,1460.66,2910.69,13249.6,2.15830125239555,21.687783987806,14
169.776,735.647,513.558,968.935,-259.327,69.4257,-270.013,2054.48,186.643,175.967,16943.6,14.1733946839194,34.5566077080823,14
86.5179,345.37,1081.3,144.349,-8.71844,79.2363,20.3451,1515.63,805.72,1406.61,13529.8,3.43212883321748,33.1293209964171,2
853.346,297.105,75.7739,741.335,-16.8602,553.499,3476.43,240.349,738.828,5830.59,447.865,9.17365111576092,-32.4837438648573,17
468.952,1303.26,656.857,999.367,-13.4246,-115.763,223.848,2404.35,406.439,312.265,18855.2,15.6994337712253,25.4402365549947,14
577.03,4288.77,280.328,2542.36,-14.4172,-56.7376,-133.957,1581.61,596.608,232.084,15079.5,-1.31037994138177,19.7421270878916,27
107.086,1082.71,1006.75,-62.098,102.877,-371.438,372.491,1045.96,137.306,9905.63,17277.5,14.0312530070487,-11.7948716735836,13
134.143,320.008,520.738,778.731,-222.815,125.872,170.48,1880.61,229.54,283.662,20508.1,19.1362102503039,25.0140793219371,14
975.027,1640.03,546.808,2456.3,-164.767,491.038,650.367,1499.01,1043.58,1203.95,6279.26,-1.08408232922201,-3.81571269249385,25
27.351,216.207,108.246,51.7893,-38.1495,121.604,2741.62,1472.17,749.158,850.599,2154.72,-7.13977370804358,-40.5924266072884,21
176.174,270.24,136.302,552.301,24.1876,116.606,3400.05,62.2466,72.7258,108.404,421.535,2.56896745876773,-39.1807207444614,21
90.7742,653.008,728.4,-3.71273,67.4221,-94.474,41.6046,1417.94,147.756,885.426,13401.1,4.24258306571548,30.3448749914199,2
121.465,392.287,336.018,881.809,-9.77674,65.3063,681.946,1762.64,184.297,215.733,13489,6.80197337384159,27.4855843990289,14
55.8445,271.394,644.047,230.095,-26.7388,-202.306,380.914,1514.39,4566.08,2301.4,22266.7,20.1546184199363,18.8133592317294,15
403.119,1924.5,1587.47,2629.78,-142.421,37.6746,736.888,2476.45,-107.046,118.343,19066.5,17.0602089580757,19.0111058788495,14
585.025,1160.33,170.004,1931.83,-37.1675,1012.89,2021.91,532.227,625.145,422.072,694.138,-11.075258764559,-29.723449323639,25
279.242,424.481,89.2446,1217.29,-25.0374,236.592,844.694,506.049,128.342,10.7427,180.823,-19.5840949200545,-13.3074481221562,18
67.912,263.11,16.9397,998.199,-112.307,1242.29,554.677,935.412,-38.3126,-167.686,559.21,-30.3772895418926,-2.6881772383663,28
206.478,451.821,867.443,574.558,-3.78389,-42.7655,-149.908,3089.91,71.5288,376.646,20968.5,22.7639418949348,27.9933090436957,14
96.8485,934.832,686.438,39.8169,-14.5574,-59.9483,521.131,1996.66,1229.5,1705.74,20462.8,19.7159615285281,22.6331114398114,14
354.644,2589.51,631.48,2604.86,-258.763,31.4532,457.449,1386.19,37.391,145.8,19618.3,17.658959063951,16.1137621016342,14
116.4,194.06,64.0659,840.612,14.7599,245.924,2337.99,1375.84,70.4431,190.907,610.583,-10.8810710668095,-36.0511710081182,21
250.236,211.768,24.3827,2355.7,59.4221,698.463,3088.86,653.964,50.3979,890.311,286.294,-0.534153576683692,-35.1682751170639,21
192.604,221.965,131.352,903.459,45.9801,577.73,1751.27,762.409,-93.5649,22.0285,519.685,-14.3983471688514,-29.4113493212744,18
163.87,341.138,68.9379,822.819,10.175,200.481,2667.94,1317.4,-17.3229,19.9046,171.616,-7.72270110902975,-37.941424180555,21
72.5436,288.702,1760.2,-35.3758,-61.2673,-15.6036,258.139,2466.69,805.013,726.882,11394,0.321777623905383,34.5897596064493,2
68.144,625.887,720.624,124.879,41.0813,-116.271,-34.8021,1907.42,1248.33,1033.89,21851.8,24.4203252660853,26.0322657070961,14
147.647,215.317,63.3164,1503.44,6.29029,717.21,552.161,407.012,-12.6453,82.6086,333.95,-23.7452864007914,-3.73130779376286,16
143.143,4730,1085.31,218.426,43.9863,-59.349,701.077,1998.36,945.696,1294.89,16455.3,0.575018335107449,16.8831955750866,27
248.294,230.999,205.084,888.899,-70.9877,-80.8568,138.012,966.046,142.991,-181.472,15197.2,9.13608760297339,30.3668647114278,20
73.4485,158.298,135.093,792.888,-35.9076,331.171,519.998,689.891,91.3862,213.524,53.2796,-26.452026183993,-2.21381418084102,28
199.106,1249.66,963.36,1161.36,-63.3275,0.477419,-489.966,2125.86,296.681,7.63795,9455.8,-1.6355240682135,31.2444455802454,2
153.316,3661.97,920.185,664.254,-84.3969,-138.854,37.0895,1903.32,231.095,34.7725,22640.8,12.2481285749644,15.1497571220984,14
43.2196,370.801,216.552,-17.6703,-22.3702,60.9249,3300.27,1100.08,6890.64,367.655,21764.5,20.0436432691995,2.73472714240148,15
135.259,198.303,899.643,813.169,76.7424,48.3937,2787.66,1397.13,-42.4907,153.518,7002.63,-1.08339159145467,-33.6398781227627,6
74.0095,586.64,995.399,176.902,80.7407,-63.0243,498.328,2130.29,295.779,1813.47,13993.2,6.08592982458088,29.584242429828,2
157.696,454.085,480.931,-30.7411,-44.0506,-22.6455,748.851,1435.83,1035.26,924.92,20291.9,17.8086826608156,19.0219308846844,14
60.878,294.975,34.7499,0.0994638,173.756,258.19,30.2983,2236.69,483.454,754.306,1166.86,-43.6596497107758,-0.00078585214844966,19
78.4323,352.541,917.171,203.205,5.68473,101.527,164.95,2642.96,999.777,1287.13,7976.56,-4.93433344122078,31.5254120260004,2
125.396,460.442,1157.89,61.6717,110.207,-292.216,462.089,1749.14,7703.05,5183.61,23277.1,15.9242224325811,10.6783746260782,13
596.284,716.992,1239.52,1281.08,7465.08,91.3718,384.769,2872.31,193.115,337.17,12882.3,-28.5828634482556,-82.2839772740911,19
107.997,207.528,24.4232,576.663,-13.3994,410.34,2167.8,422.379,-118.847,80.5849,1604.33,-9.54429593479454,-34.220967953461,18
46.3269,156.037,572.12,-132.589,194.65,65.9615,-235.493,2161.26,552.278,871.584,12296.2,0.835124785112285,32.1896980343222,2
106.214,933.117,656.013,141.118,17.6155,-12.7263,339.701,1660.77,1454.52,1844.25,12741.2,0.525852598831283,27.4108155671468,2
170.656,3294.67,1017.04,1336.87,5.42696,55.6047,-0.749278,1844.08,356.439,313.409,21720.2,12.6603676678032,18.2145738266035,14
76.4636,332.041,-284.488,-693.265,2936.05,-72.8088,277.994,-299.262,50575.2,-302.366,1042.03,-12.1849100525676,4.84411766884278,15
-15.8501,288.171,1072.04,8.97314,45.5309,-199.541,217.17,1838.14,2206.11,3984.7,19962.3,17.8391223913577,18.5894428959932,13
110.82,203.582,181.855,953.482,-35.2128,169.033,-384.311,513.95,111.196,162.185,1.2798,-34.4631299580817,14.076765876818,28
48.2101,341.651,11.0778,574.807,197.192,127.783,2660.21,168.688,288.58,880.059,2615.08,-3.14092041893303,-34.6841334339441,6
223.718,361.66,70.4403,590.51,126.093,195.247,396.369,1128.87,38.2111,183.908,294.605,-30.6352301942634,-2.69028494568608,28
154.863,534.816,793.554,69.0747,17.4243,-211.34,29.4574,1567.15,1229.35,1432.75,18331.1,16.3649064514883,28.9058687215465,14
343.285,183.019,394.297,810.582,-120.149,-15.6347,1380.12,2175.68,-111.391,252.34,7749.89,1.05827340554377,1.6055832643934,2
343.761,1184.65,898.565,597.142,-6.94309,-160.112,200.51,2238.26,128.202,297.822,21102.7,22.4957788126712,23.65057110556,14
169.431,230.415,47.508,-34.6825,202.357,414.735,823.926,194.614,1091.18,215.362,11302.6,5.56430850422875,10.5982963212357,20
197.735,938.586,738.932,1614.58,-183.742,-66.7282,-157.617,1599.02,122.827,150.922,19913.5,21.6388271350092,29.580611810836,14
57.7356,741.088,1136.51,-31.9596,78.3191,-48.5371,-80.2034,2771.29,1186.14,1727.73,22502.4,25.7220774165597,25.3331620158278,14
189.841,285.145,1067.7,565.563,-54.7899,-64.5693,337.444,2170.29,680.737,1586.05,10480.6,-2.70362889628443,33.9946458484665,2
526.111,232.613,68.9187,828.959,-54.1953,384.244,1955.29,568.76,367.66,10.9926,186.982,-11.9002685623108,-29.2040856104307,25
109.428,536.166,1171.26,115.765,71.8277,-128.034,632.555,2207.97,278.422,3166.13,11064.2,0.988211806762044,25.5503904572409,2
-4.45628,190.513,45.5131,1006.99,-58.0632,568.316,1020.29,1062.03,144.511,-8.71671,686.539,-25.8156513991834,-19.1855060389548,18
124.084,212.332,1315.6,-164.307,6.09308,17.5607,186.947,2277.18,625.086,727.109,10972.7,-0.741801685182925,33.7634169532596,2
29.8172,170.926,136.557,781.304,28.4202,76.9022,53.6434,1426.8,310.718,294.604,1181.4,-41.8144274489176,4.69145720516384,28
212.815,369.405,185.071,279.856,70.3533,50.7767,3934.51,2737.23,299.808,15986.8,477.138,13.8018754326745,-24.9869119773124,17
128.947,375.817,804.996,67.3574,111.749,-109.92,7.6837,2477.73,1081.33,1277.41,15377.5,8.31966626813692,31.8044111296277,14
283.509,99.0933,94.0143,660.243,55.7426,384.118,1841.05,416.21,-212,152.214,45.989,-12.5207636541407,-28.4289096181246,18
481.316,621.54,104.85,1162.82,36.649,562.699,2545.38,717.335,-178.668,189.75,5597.36,-3.15603191295906,-33.3463323855221,6
95.577,671.031,1239.69,180.025,25.3028,-6.75403,423.138,2701.67,188.966,785.294,10611.6,0.220125778145223,31.4558006990921,2
268.18,223.449,98.958,17.2332,-9.33018,236.636,1592.3,1671.72,1686.63,47.9018,6480.75,-13.1456249168137,-22.0638775003233,6
937.477,272.924,89.901,617.12,-62.9699,-13.7299,4910.17,203.011,106.994,232.144,6336.72,10.828132736185,-35.0073992436297,9
126.356,271.385,44.8948,1111.36,133.302,156.844,1612.11,204.487,74.9525,118.475,52.7461,-14.0735354250927,-24.6644850714541,18
39.8286,224.193,74.7376,188.304,3.25003,167.305,341.742,73.895,1379.02,224.986,2821.23,-18.4726206061379,11.8104241787561,19
267.884,2305.2,1397.04,594.696,-43.728,-156.147,310.475,1635.87,5822.96,24.0117,27730,22.5005635597442,13.9963262214695,15
151.211,884.875,596.773,85.2776,120.202,-64.2305,241.186,1816.83,2950.21,540.287,16354.5,13.3887897366023,28.0531690937741,14
7.56735,243.042,23.0835,-41.8777,631.062,150.47,1193.52,3348.32,4547.45,55.0344,827.884,-17.3094202965387,-9.58980385939336,19
64.8811,414.383,1041.82,718.084,-93.4038,-20.8322,-112.083,2340.88,114.86,160.871,10162.5,-1.74426746816113,35.077979334058,2
103.367,335.402,168.408,3911.46,-124.005,141.504,1266.12,159.145,-18.3426,-1.10857,417.761,-10.0521096872713,-21.0198445007463,23
2704.54,352.834,337.865,1068.19,-250.674,-1020.44,-1184.04,1282.56,272.844,603.407,42272.6,22.7506791359684,1.62380876655062,26
233.976,183.827,214.591,-36.6678,48.7214,153.333,379.817,1821.45,3503.81,237.25,5354.53,-9.23662845151685,13.1091485384052,15
72.5141,234.177,27.4034,1065.99,62.4004,226.702,337.706,217.992,118.416,241.408,876.456,-24.5663187916017,6.20829648119073,16
4465.17,1358.54,69.7405,401.854,63.1281,-161.261,3490.06,1365.81,154.245,22321.6,-700.761,15.553985187999,-14.1169412383708,25
124.899,1040.39,452.275,83.3043,-5.13609,-2.92827,1013.46,2184.47,451.793,803.243,7891.48,-0.738557451050053,20.6763192613034,2
150.171,2341.62,669.013,45.7653,76.8872,-111.354,-61.9834,2551.73,-55.7088,1524.41,16871.7,8.65945611133275,21.2907656726406,14
37.6066,191.767,349.993,154.355,-2.17888,166.618,677.858,2311.34,713.631,804.165,1408.74,-42.2475512257723,-11.385109178456,19
626.435,264.179,80.9086,1123.88,-110.225,117.966,190.86,108.436,221.832,56.1809,421.64,-10.0569068349028,-5.28394016257069,25
163.59,1516.5,503.871,173.968,415.535,121.213,244.415,2783,399.434,729.582,9672.62,-3.25367151464406,24.7353621356431,2
28.8293,1187.52,793.99,2.55484,103.886,-175.041,38.6533,1451.41,656.254,1552.51,13216.9,2.39110854500555,27.0772607473196,14
45.1492,490.748,230.737,1464.44,104.937,-76.5791,23.6348,1648.36,66.5655,436.048,17518.6,16.4378041772324,31.500822827637,14
24.2849,200.266,99.1842,863.784,5.84,468.496,4125.96,1105.22,-129.633,302.996,-78.4284,6.10551846963286,-41.9901010124239,21
203.005,564.135,479.094,161.929,-56.5881,23.0932,-219.111,2932.68,1239.38,1008.26,11533.2,0.202231250353149,32.8066327160087,2
26.7736,347.842,118.505,3541.33,132.112,1337.25,4596.6,1980.25,809.925,5366.37,17.1621,12.1380812128117,-34.0878394192357,17
84.3822,293.857,775.844,117.004,86.2699,-90.6076,-10.1731,2480.68,548.082,1014.85,17185.2,16.7009438254723,28.8467723538812,14
246.405,563.859,126.852,-22.4053,3.2258,506.346,2683.78,2445.83,249.712,2231.07,-37.5862,-7.15166699533639,-37.1385847357284,21
149.765,571.856,27.0504,-2.53175,2.85956,910.069,2105.2,792.881,244.821,1128.88,209.28,-9.43009845665848,-31.9795388601982,21
4321.16,353.022,71.3853,1339.56,8.9743,215.361,-484.667,-57.2712,17.4819,89.3811,280.786,4.82534005561446,-6.66027722406047,25
139.092,130.502,403.218,205.5,829.572,-141.229,571.784,-854.633,73278.7,262.092,5894.08,-1.48220730767444,2.03764000647661,15
123.938,269.285,55.3926,-58.3198,115.643,1128.05,1912.83,299.819,720.809,746.282,1656.07,-10.7092939395495,-30.1752696064893,6
346.715,920.163,695.864,1128.66,-79.0142,145.41,629.407,1972.04,731.162,185.502,6830.57,-4.67093489380899,21.7562656058708,2
126.995,2470.64,961.287,52.8109,-42.6956,302.57,57.5086,2291.81,1256.24,1310.15,16006.6,3.75667242713046,20.2706875217865,27
167.252,540.314,406.427,30.2114,16.9296,-6.15447,124.636,1593.68,1063.54,2260.86,10950.7,-2.39177443161873,29.5167401966514,2
1304.92,554.918,61.0319,1150.17,-10.264,270.051,-462.401,1116.15,-52.2348,259.097,1193,-0.591387795534863,-6.15156525514123,25
357.646,1478.72,877.587,1206.3,-120.087,148.374,-162.765,2377.45,223.966,275.468,13745.4,4.83819738160548,29.05705900739,14
-19.5982,446.289,337.288,789.368,105.083,-16.817,-35.7197,1606.79,263.714,229.147,11343.5,0.167610827730604,32.3278056523743,2
234.124,215.233,267.191,846.647,-12.0127,86.108,2223.39,1225.45,36.6215,72.1247,6763.62,-6.03502146289914,-30.1356591852669,6
50.9745,1635.38,1066.29,-59.8685,139.491,-135.521,195.583,2187.79,1307.5,-11.4035,16166.9,14.1549701873207,28.6594294926815,14
437.993,180.868,32.2005,649.007,-25.0505,116.637,-330.129,2218.32,146.663,226.613,298.057,-28.4886261075404,-0.370082373650308,28
87.7108,172.13,18.2304,57.9654,51.469,37.5669,43.4211,1018.81,29.2534,2290.87,343.974,-13.0555916031088,4.30264708268947,17
131.46,274.684,127.53,7464.76,62.3151,1013.85,2919.77,490.212,470.557,9495.68,83.063,8.39441803660669,-24.2704404119523,17
95.1359,216.841,107.006,842.073,71.7763,291.094,-181.17,1057.44,163.219,-1.09418,790.391,-39.6584605116232,9.99019416475177,28
23.9305,165.122,136.363,4667.33,-135.319,206.806,1605.6,360.67,-184.864,19.9533,274.915,-5.91343045311651,-25.6505001708504,23
680.177,722.326,109.907,559.352,-59.2321,1410.99,1690.63,1094.69,379.799,147.992,364.92,-14.499123005776,-24.9094661243996,25
157.555,192.622,118.195,1810.88,85.0107,479.372,3330.96,1501.05,184.436,12192.4,-597.193,13.9096700305249,-26.9953711638971,17
82.1818,1943.51,224.244,-0.844643,18.3612,-98.4741,62.0043,1273.16,1146.29,2708.83,22147.7,19.7623692188528,20.0618826713003,14
216.362,5618.2,2463.13,823.222,-117.073,368.955,545.004,1087.83,287.013,17.9865,2451.82,3.20164093802709,12.4412237527894,27
262.524,370.677,487.581,552.912,-72.47,-85.6975,-141.141,1778.09,244.911,493.38,11522.6,-0.924396835038424,34.5459435508028,2
-31.9313,406.305,798.317,-15.2395,36.7305,41.7795,-221.821,1736.47,927.272,76.9083,7650.55,-5.67893165801073,30.7701672039906,2
95.7545,4452.03,1275.67,613.36,-91.2689,-42.9046,-284.662,2589.97,114.288,180.635,17833,4.25359172936111,14.3338835898975,27
195.968,1826.28,596.938,1010.84,-65.4072,-5.94549,408.151,2061.98,327.996,416.564,18126.2,12.9574032050403,22.3965187805347,14
250.462,570.343,824.995,435.255,-84.4976,602.789,4158.06,3160.59,890.404,358.496,273.353,5.50735307988895,-41.2105228257992,21
414.507,1655.11,9.80006,16934.3,139.722,53.0917,5310.94,127.543,193.876,3120.39,6773.05,11.09827592646,-28.2480285139852,24
66.6131,780.979,351.425,112.261,16.4624,51.9156,2746.41,-193.303,2360.36,304.758,17068.1,22.1544928680148,-0.731086080382262,10
207.521,470.585,28.0345,918.037,47.8978,140.912,2124.78,226.293,380.329,14.3193,6849.36,-4.4465843827945,-29.2983190806237,6
263.816,621.171,43.2617,849.344,19.2985,305.406,145.886,507.131,344.233,170.794,972.971,-23.8190835154885,11.1057240791385,16
179.763,1556.89,688.826,74.4199,-12.5895,-191.247,355.146,2541.27,1028.71,747.704,25917.2,28.1561253748411,15.6723032294838,14
422.498,500.058,75.6456,718.52,-68.3257,-43.2312,9283.95,105.044,138.627,218.942,16479.1,18.571392268163,-34.1771775703377,11
334.606,657.763,49.5004,52.8806,66.937,64.1243,1000.15,226.788,1365.07,3285.71,6101.24,-3.21367328499617,-4.51516425199079,13
102.257,1195.26,752.803,713.886,103.421,-104.502,62.8717,2048.33,1111.15,1110.97,23783.2,26.9811261150494,22.7019401598955,14
28.7143,2057.63,29.7216,647.962,161.32,-75.6521,2083.73,261.666,313.427,56.5399,25924.9,26.6730453610283,0.833869633190413,26
8.0017,456.087,89.8458,219.15,-9.22265,665.328,3474.14,577.378,292.226,715.583,15222.9,23.5601131544552,-5.28431900192572,10
124.32,1622.33,72.8009,720.445,-45.5148,-63.8974,821.556,289.864,267.024,319.644,15514.7,10.7060375061106,16.658917598525,20
266.783,193.136,209.13,613.809,128.356,122.359,698.935,1160.88,328.012,1268.74,5796.7,-13.1877100196564,6.57864216640839,2
140.643,320.912,40.9529,85.0707,-1.83461,199.315,860.751,445.27,972.93,1838.42,7174.71,-13.0628329932381,13.2847155050818,7
359.849,1118.05,273.818,269.934,82.1413,-101.208,1333.54,482.991,1377.73,346.779,8917.4,4.7871395207271,5.90645901501473,20
84.2068,366.602,156.807,740.055,28.4922,878.123,2103.09,1331.69,283.291,72.9814,2308.29,-12.8231517559415,-35.65614192806,21
244.732,494.724,939.742,631.167,-15.9928,34.4792,-41.736,1800.5,414.38,335.419,11888.8,0.520517381770288,33.8030351989257,2
108.744,294.818,318.722,216.117,10.9224,32.6028,137.89,2011.24,982.064,1024.85,19628.6,18.9502085456029,27.2445961412909,14
139.049,5021.47,199.432,111.774,270.281,-240.034,3079.23,37.8788,18290.5,676.802,28770,8.76710867532904,4.47849452218934,15
-23.6724,644.062,5.87922,5296.58,106.039,649.729,1733.55,21.4847,203.232,217.677,9473.38,11.6590278768926,-4.1354441043409,23
71.5484,148.489,1102.59,72.7755,-30.2234,144.283,750.985,1422.3,981.055,-100.805,6119.56,-11.4479583470102,15.4308642145637,2
189.32,776.51,152.637,569.845,127.142,561.707,5389.92,1199.42,68.8216,226.336,341.57,12.5515697092781,-38.5701498026814,11
149.078,434.073,176.403,742.6,29.173,839.137,6363.57,559.985,420.565,306.303,4070.74,14.7134829898025,-36.9831534143916,11
2304,1563.02,78486.4,2577.66,-665.497,111.477,1847.35,-390.157,-577.828,205.18,478.956,38.3892064589722,-20.8253398507086,22
99.3891,270.106,47.5992,1179.27,-15.4747,104.212,26.3027,431.58,69.3384,157.075,2630.48,-23.8148630076645,17.213662419371,16
240.034,424.963,113.22,572.565,1.73241,1060.33,1426.85,280.663,61.7193,177.254,1239.19,-15.4762993768569,-23.305067393127,18
101.569,533.457,807.738,222.395,-45.9793,40.1992,322.852,1454.88,15977.4,259.102,17083.2,-0.51896643221868,6.02705821448522,15
191.025,387.469,297.447,668.228,-40.1161,124.699,2908.7,653.599,74.2439,90.6202,427.532,-3.93800371192842,-39.330024209758,21
52.8877,307.656,167.69,902.01,-35.8754,202.861,5531.34,89.0389,10.1921,193.305,582.934,12.5656496007133,-37.6265804781999,11
222.424,330.249,199.81,1292.43,-142.701,1433.85,8264.75,1526.01,191.117,270.139,1550.1,17.0714174956009,-38.875386037497,11
498.491,659.929,75.1402,7947.54,103.769,492.029,1573.26,1157.64,9.23491,15315.1,2437.89,8.65352357953939,-19.4917906956246,24
36.9576,344.947,272.25,591.844,41.345,739.676,2496.26,1592.69,90.8375,201.418,-60.7679,-10.0293464715477,-37.318905193328,21
144.566,323.524,198.803,1169.53,-13.2698,862.081,1396.96,2366.58,390.931,84.7874,433.46,-21.4129867269131,-24.0670627028058,28
266.547,330.441,56.666,1116.16,-67.3969,422.852,6152.66,591.781,419.488,166.302,5986.71,14.7799308010079,-35.9215610844177,10
182.438,825.861,-6.58739,1604.28,81.0476,132.771,-278.35,881.319,284.016,189.251,544.491,-35.1967988981129,13.0699439943289,28
108.149,241.265,44.5023,629.465,25.1036,176.187,53.7959,958.838,373.389,209.737,215.924,-38.5745489784608,5.95355104298227,28
103.281,354.112,20.8348,2631.7,-163.106,10.1829,3187.85,449.409,59.7793,93.511,5223.5,1.11232937375043,-36.627071433265,21
95.5576,239.906,34.3318,743.838,75.2111,1898.4,408.385,859.805,-68.3978,203.137,54.3388,-28.7819724399931,-0.430576245635013,28
210.316,239.234,185.625,2269.78,-55.8309,21.0698,-142.488,669.631,518.858,511.207,6708.07,-12.8095192071336,25.9021091513022,16
95.1648,355.651,122.558,1546.51,63.3686,494.274,8036.49,195.388,81.2438,41.5268,4720.84,16.8973121143769,-38.0436971517477,11
130.23,167.132,681.826,-83.9473,169.457,249.759,2261.45,1539.94,702.267,1693.35,9125.22,0.737206916166502,-20.5541390502739,6
60.9865,170.078,63.3416,816.184,85.3518,591.909,1323.09,719.151,301.906,32.9804,1241.01,-19.0552895028204,-22.4040451511625,18
188.655,181.551,825.982,1039.38,16.3792,56.9411,697.074,2700.06,621.173,971.462,11214.2,3.39411410616964,26.5258304145437,2
150.473,366.175,1022.68,33.6491,-46.4996,34.4896,220.973,2453.85,1114.11,-7.55982,13133.7,3.8493861967458,31.601780504826,2
188.429,247.448,55.1892,619.048,-81.7837,178.429,4864.41,204.712,47.4542,2.46517,2385.38,10.520562974879,-38.0050594495251,11
141.071,328.143,197.536,1403.18,-44.6264,146.797,163.494,810.55,-3.40273,326.613,1490.74,-32.4679353930141,6.81165235523289,16
131.868,557.61,64.3247,196.99,109.225,3394.37,11068.5,2048.71,2727.02,1979.5,7316.29,18.3926001115177,-38.9738521441732,11
409.868,671.073,87.9327,1096.94,-117.478,-285.242,4629.65,280.901,268.69,131.516,38179,30.4448928138716,-5.67092848176953,10
274.299,507.728,87.7767,768.328,40.7398,257.982,7043.8,2018.05,178.203,404.998,-204.462,15.5376407407515,-38.9753956462049,11
87.4767,1488.44,888.211,64.2427,46.9849,-20.4022,417.585,2753.51,221.784,722.583,21224.3,22.2863897987849,20.7922892789797,14
772.917,387.1,-0.794937,579.296,127.749,769.766,6503.5,1843.02,241.514,664.67,312.196,14.596338964821,-38.187785166422,11
204.866,701.747,832.041,91.8523,81.4729,-37.8642,450.523,1609.78,1971.83,4061.92,18340,13.4932091687508,17.9665194715998,13
161.753,1068.05,10.1782,598.325,37.1692,250.818,225.025,246.914,183.811,247.781,2218.21,-15.7115852212521,15.3802127257218,16
172.294,442.46,28.4798,1394.37,-98.2237,119.714,2953.43,684.048,286.729,10510.8,698.163,10.6199556995689,-27.4435079777829,17
98.0124,4398.3,704.917,62.2248,73.1814,206.688,812.29,1399.46,1499.33,201.949,16949.3,5.61332236822703,14.7390894834861,27
500.384,395.792,97.024,614.64,-14.7075,829.852,2873.18,456.523,278.29,180.866,530.613,-2.44968399749976,-37.2449992557462,21
55.0095,859.126,657.616,643.136,-5.77655,-263.596,-27.0091,1259.66,230.697,20.3984,25804.9,30.2227140336381,20.011316326406,14
148.796,381.113,627.772,639.513,76.3823,-11.5266,408.375,2383.53,40.8341,460.995,15019.4,9.80796429920748,30.201761676055,14
382.273,-128.451,57659.3,681.807,-207.038,679.231,2905.4,-140.799,669.865,621.762,3131.66,33.9815583618045,-20.3292809010933,22
112.363,2538.32,711.71,169.646,26.6799,-173.968,285.118,1824.42,1099.38,1583.19,11143.4,-0.0395767958674843,17.7651460529229,27
334.023,969.63,164.541,40.2923,34.3119,403.436,2256.82,245.763,1068.67,1303.86,15386,18.9772431385129,0.741016456823758,20
102.645,756.968,77.1403,1133.13,-8.54043,83.6435,1573.38,501.592,-34.4628,236.607,4040.63,-12.3450744670336,-26.4572310577744,6
113.292,537.966,610.339,177.536,-38.0333,70.6833,318.807,1900.47,813.905,804.119,13433.6,4.10706860906758,29.8862236356786,2
323.199,739.654,203.707,91.3798,82.2525,143.049,466.806,333.912,2668.17,886.918,10942.5,-1.09815787414039,17.1965492658249,20
1058.82,3334.16,163.942,-7.83896,244.809,163.453,2583.77,180.142,996.994,1914.98,28976.6,28.5833434992256,1.50730405019738,10
150.513,458.256,616.278,209.049,-32.6947,16.1954,-55.7408,1346.44,1054.04,268.944,16055.5,10.1973061750092,31.3956841024106,2
148.295,1043.31,488.865,-5.14718,58.7702,-105.728,62.6195,2088.82,1217.5,445.423,16476.2,10.7053752342362,26.7205194705328,14
485.764,526.869,7.85693,86.2843,-23.0312,180.745,652.055,284.018,71.974,1515.13,688.302,-9.51566459410091,-3.83681652833746,25
167.797,956.753,774.883,679.832,13.2255,-158.911,432.723,3270.04,880.004,239.987,21670.9,22.295868227181,18.5209707710363,14
154.395,1127.71,417.766,894.084,136.713,-161.194,538.717,1713.01,405.092,222.315,17176.1,13.5632807327959,24.6151803915056,14
106.735,1595.65,333.481,928.645,-2.57329,-125.275,-12.5291,2182.48,397.153,426.651,21090.4,22.431531556446,24.660275383186,14
227.484,511.953,59.4815,4122.53,-211.552,1184.07,90.7724,401.256,265.217,7071.7,472.476,4.91767514508102,-18.4823650083298,24
110.671,583.373,206.284,117.277,68.4326,74.8343,790.441,655.053,313.553,1289.89,297.414,-18.8716127066259,-6.53683936371452,7
921.182,2413.76,1345.06,777.013,45.4669,924.628,3664.54,2897.39,6375.79,2377.72,9430.02,5.53733386623257,-26.0571691638321,21
288.488,2035.67,1844.17,112.663,-5.17195,1933.71,-113.886,2653.94,1867,1404.09,19154.4,12.3794305584235,23.0898495649236,14
65.4674,700.514,431.992,77.1425,10.4629,-17.5324,87.0761,1427.89,990.521,160.39,23457.3,26.46140526241,22.0659052636809,14
263.246,1306.03,509.113,183.687,107.257,19.7178,806.243,2606.83,798.743,780.193,17339.5,11.540747085323,23.2330319612053,14
268.174,586.571,713.976,368.54,84.1868,-110.572,2035.49,1579.01,907.817,0.1602,18806.2,18.2560692040431,6.85161728309757,20
32.0447,4672.15,643.247,29.4435,82.4986,89.4641,435.649,1482.87,601.625,869.67,15918.4,2.31394192304117,14.4235872446453,27
258.307,9704.14,122.809,1122.38,389.762,206.685,1608.54,740.306,-345.941,484.487,8897.75,2.90468357157611,16.5569991050707,27
244.973,300.128,83.215,869.021,-108.793,2239.07,7202.65,1044.32,42.9217,340.754,1004.73,15.4280930568232,-38.3188701125413,11
33.4417,8197.23,868.722,750.086,291.514,272.453,-311.772,3474.46,285.836,424.699,2620.32,6.74697795765188,10.4832851057331,27
120.927,314.992,30.9298,2902.73,127.017,163.04,2654.56,447.046,421.474,250.767,15757.7,19.9419151120905,-0.0980128241786399,23
315.393,312.705,87.0487,755.018,-70.2987,135.39,1652.65,1240.92,58.1366,113.068,1415.5,-16.4717272661643,-28.5526587525323,21
166.631,304.778,184.71,1088.52,-48.7038,64.2782,1040.14,41.0516,342.065,208.015,14286.1,15.6900868225636,7.92362026792206,6
172.586,2858.7,49.8999,885.676,75.9395,265.73,800.997,312.331,-44.6119,127.057,563.012,-3.95452797423304,13.6887095508488,4
64.6921,216.096,315.039,674.013,-10.3643,290.368,7928.62,1587.18,290.226,195.791,1106.64,16.5209390467881,-39.1647856917217,11
141.902,334.746,93.617,782.849,-24.0241,166.132,678.488,124.094,49.68,263.395,1373.16,-18.6584556403755,-3.00352199184245,18
350.937,4344.37,37.4793,1312.38,247.251,76.9883,717.284,241.33,135,111.955,5170.22,-1.86873112949511,17.3828310408213,4
231.381,621.304,571.261,655.979,27.2348,-86.594,-69.1379,2036.9,70.8221,261.942,9274.04,-2.59959003088064,32.0068647486197,2
154.278,816.77,1412.87,244.339,68.979,-72.8474,480.753,2491.67,4706.92,555.794,11687.2,0.427693273573447,17.831949744815,15
137.263,247.304,149.671,2117.15,-68.7066,915.075,4667.96,332.659,501.607,131.034,105.08,9.74782193686616,-37.0645702610467,11
120.772,560.044,120.701,199.441,-68.5136,14.9971,3189.26,315.001,325.449,1247.88,10902,13.7418650703876,-20.2123854135186,10
63.4852,235.326,408.499,630.595,-73.4298,274.718,226.339,1127.25,93.2217,390.732,6070.41,-12.8597050046675,27.4166185629893,28
129.532,247.608,15.9183,713.387,24.1319,1347.72,2053.92,536.489,301.432,141.889,203.99,-11.5592732446421,-32.6240637990857,18
131.16,228.723,22395.6,554.775,-29.1641,467.911,7508.31,1383.31,403.6,467.553,298.863,25.2721634367032,-40.9067162942732,11
44.7211,2686.35,533.942,61.7492,69.8602,64.0821,617.926,1301.95,755.978,801.265,20920.9,12.5749247907367,16.3756338897901,14
214.054,494.044,103.097,110.309,86.396,125.936,2069.12,369.932,71.6597,768.616,3496.28,-8.42047326605205,-32.5879534336841,6
385.815,3846.33,33.1319,69.803,29.1947,218.071,735.327,118.328,691.894,852.914,881.786,-2.4372715633147,14.9972748425926,4
139.518,295.011,168.249,1529.68,-23.6549,701.993,1421.44,374.001,356.613,375.736,12577.5,13.8276937332217,4.98811348294448,6
85.8219,341.174,79.6859,636.314,101.162,212.511,2698.18,309.775,363.215,252.47,-127.638,-5.44949803695269,-37.262907448839,21
134.98,344.605,968.413,53.3778,118.659,-130.903,650.426,2380.55,1147.85,12.9415,26232,26.435881680605,15.3887805355725,1
1390.21,1316.01,183.446,4634.83,49.8446,224.914,519.184,238.959,19.181,409.938,3475.95,-0.1948323264599,-9.11165393538016,23
184.244,332.434,69.0277,554.208,73.0988,167.147,1216.15,252.178,97.4128,101.693,804.391,-16.3504647069732,-18.3306542075366,18
185.991,348.055,133.745,1558.83,109.316,586.422,8218.13,352.385,43.7178,307.034,1420.84,16.4217243499777,-38.8261201488347,11
111.632,1605.03,465.302,758.407,-44.8857,-68.0765,294.303,1370.47,-136.568,306.829,10789.5,0.720215239819853,20.598818810283,14
171.014,240.021,41.6354,69.0671,5.19563,583.504,1278.67,594.088,-47.8491,876.066,5900.43,-6.17399492554455,-11.8271289062127,12
-9.03454,393.451,949.284,11.5851,98.2249,-21.1985,-95.4383,2781.04,561.51,901.733,15671.1,10.9395553674662,32.5908710271817,14
134.012,615.173,303.388,280.447,-9.60596,-70.078,-99.9303,1826.05,375.933,949.635,13100.8,2.29822554637436,32.2069489723816,2
253.338,760.033,516.373,103.701,4.70632,-1.44029,-75.8036,1579.7,2377,3637.84,22220.9,20.365275913961,21.6342597894926,13
84.5774,443.421,69.0917,6.75427,18.6561,273.553,1902.26,497.313,1534.87,3727.5,13901.9,11.5570623894787,-3.4662898874161,13
173.243,393.095,107.84,-1.57479,-8.63056,105.029,626.594,250.893,1358.77,473.698,5137.65,-11.7096033424983,12.0145403835156,7
448.795,655.126,40.814,96.7429,30.0168,276.382,402.918,114.06,2542.08,141.255,1588.47,-13.2757920750642,3.90155792320735,19
60.4681,519.478,130.742,2402.31,22.1657,1157.27,974.211,294.369,142.22,38.1352,6447.07,-4.11589043972448,2.0676553247685,23
188.401,-204.049,121418,659.3,-199.811,317.294,9966.72,-189.237,18.1527,200.683,202.841,37.4089253022661,-20.8325439015291,22
83.5667,564.799,336.127,677.55,15.9637,114.785,2603.52,982.627,428.518,135.51,3810.33,-7.75885987443138,-39.9526503377477,21
491.763,267.511,191.704,86.0828,-18.1411,399.463,5560.78,771.275,1612.81,415.695,2670.9,12.9190807008151,-37.3994854088966,11
209.021,1039.14,144.64,86.7005,-70.5284,494.516,4876.13,270.862,1013.52,498.081,44654,29.8820990518245,-5.88206975169434,10
124.893,789.952,96.912,210.584,143.981,287.625,857.59,422.844,516.948,1098.03,844.41,-16.1872340433904,-6.2008524153407,4
58.3202,1181.07,94.8764,1009.18,-0.879712,100.039,1061.73,176.11,176.87,-9.49316,509.704,-16.8925391680614,-10.7097361118543,18
224.187,1108.2,449.104,93.9359,15.1388,25.9772,110.649,2885.84,745.02,796.416,17712.1,14.4137089632591,26.8577685892082,14
251.938,375.968,323.675,563.595,63.6954,147.627,139.652,1376.21,634.744,381.627,11766.3,0.288153159544795,31.0193064054273,14
-1.17161,884.052,1194.12,143.736,-4.66681,-157.047,-5.17903,2295.27,956.058,435.068,16862.5,14.2927059017176,30.1140024580034,14
119.253,260.602,52.1318,660.903,2.72076,594.718,3262.8,497.125,-3.23085,284.645,771.289,0.0981345616284047,-39.4864442938895,21
81.2424,369.318,88.2959,78.9409,26.481,80.2166,684.001,-2.03422,911.013,483.543,3848.26,-13.4187955155962,6.11522813371262,7
516.001,245.604,74.4685,845.106,85.2694,154.889,2877.02,210.105,85.6915,127.381,605.277,-1.83321143287266,-36.1682418946222,21
206.345,245.856,147.436,590.083,-7.34496,542.254,1083.05,1269.96,226.954,359.166,556.044,-22.1794940362913,-20.3295278104387,28
167.926,255.441,66.7299,2651.39,152.212,215.916,365.773,321.561,128.251,110.91,962.21,-17.8266350923174,-5.31849774888297,23
68.9999,1499.69,621.762,41.805,24.1619,62.6246,-203.528,1635.63,595.178,935.672,17788.2,22.7443480598709,27.7111306023645,14
50.1992,368.411,338.02,50.132,53.5648,733.408,1612.7,1108.39,915.466,215.462,5399.14,-15.3244878877968,-27.7322965205802,21
128.956,276.037,80.2717,1301.41,90.0192,468.094,402.734,368.243,-41.0091,396.992,376.606,-23.9355099750164,1.85825617970992,16
36.2732,211.226,488.229,2504.42,-36.0705,-8.07294,167.094,1542.63,495.417,220.643,14929.2,7.92025573064861,35.3060100660994,14
126.756,234.499,143.615,2391.26,-134.915,203.463,4412.91,-12.2973,458.188,256.598,12401.6,20.6250229836268,-16.3551210403437,10
199.76,1715.14,65.4079,2240.69,0.857093,-1.78214,1177.45,219.5,310.35,225.896,12846.8,9.5345256554523,12.3253572865352,20
235.844,507.543,121.01,597.36,23.9578,72.0601,3019.99,1084.3,254.71,212.267,1490.47,-3.19953275541024,-39.5250117168273,21
201.217,786.138,431.933,42.645,-52.4898,-82.1556,69.6047,1689.05,918.977,388.347,14305.7,5.20888031513298,27.8997886514684,2
254.764,318.764,145.604,1003.55,-22.8878,324.724,2014.66,1135.05,154.324,82.6857,728.206,-13.0885387722081,-33.088567453786,21
200.964,832.622,474.321,844.741,52.3967,-52.4343,545.987,1713.87,250.96,442.127,14635.7,8.58131449384632,26.1921043468182,14
184.95,184.297,70.5408,82.9175,126.568,689.048,1548.43,932.502,2123.5,231.201,543.071,-16.3894998287426,-20.8872425025744,21
62.0778,980.658,855.13,854.492,-68.5911,-22.8737,31.2486,2646.04,269.389,-57.0958,18118.8,15.6540221664185,29.9105590314722,14
193.29,377.679,49.4523,807.575,-9.50534,471.12,3086.44,1450.05,228.054,309.592,277.818,-3.59202650653351,-39.8869018536887,21
292.024,626.657,1370.03,26.3618,33.8031,12.2811,714.994,3054.51,879.998,375.615,21086.1,19.5222151580324,19.9826623952419,14
236.242,1504.21,532.401,585.21,78.3049,134.838,707.292,2302.75,162.97,353.992,496.153,-19.7751158570405,-1.63911963338686,28
105.992,332.574,234.873,749.775,-7.36953,-162.493,2443.85,1411.21,195.183,303.117,19981.9,19.823879668959,3.40605115151121,20
58.3356,369.764,52.0553,86.5776,53.6514,1155.55,1726.42,1085.45,219.589,819.957,5552.91,-12.0265590710686,-29.1355657871378,6
761.628,914.708,229.945,5574.67,-35.8168,493.032,2864.97,1028.66,2055.4,21888.8,-528.321,14.8616546446032,-24.7831169670099,5
92.3938,631.777,1008.3,-7.387,158.822,-62.2365,-37.7573,2574.92,5524.87,236.283,17078.9,9.51564116507848,20.8757413051222,15
142.447,413.861,165.529,47.8788,113.378,60.0759,3140.98,183.925,186.77,4421.35,1363.53,5.38143296825211,-30.8537416515543,17
357.955,357.299,653.24,1156.05,-59.1596,341.823,3009.25,1726.08,-0.884097,49.977,153.939,-3.9684167177523,-38.801205860219,21
672.856,642.397,99.1075,555.813,-95.0585,322.984,7678.93,450.46,292.411,-28.1144,2602.72,15.7576683121259,-39.3233347128642,11
87.8314,232.064,208.77,622.13,72.8024,175.621,1332.12,416.115,187.482,189.553,399.607,-17.0210785103468,-21.0413864816891,18
130.218,847.571,152.336,769.356,-27.3831,233.243,7543.28,428.776,288.655,165.499,24799.8,27.9756796570598,-10.5133791265582,10
149.152,305.445,118.291,199.73,32.2823,681.54,1129.89,362.831,192.479,807.366,1426.77,-15.632845706989,-15.1899395991832,12
170.142,191.877,316.637,772.038,-54.2479,120.161,2174.33,1589.52,394.46,228.374,5282.86,-10.7866992757286,-35.8917941908714,6
88.1967,517.445,472.76,584.134,60.9521,-74.2328,1353.49,1395.51,595.724,152.108,19066.2,16.6684013018089,11.3139503453247,14
150.181,5186,60.2073,640.015,340.955,-10.5496,1446.48,362.379,117.253,184.616,34205.3,26.8973643844257,7.86326189619975,26
95.7188,233.991,154.612,818.003,19.2787,90.0272,165.061,1493.68,230.598,355.967,1842.09,-38.824122186505,4.17650664867872,28
455.977,572.417,-1.97189,174.54,189.281,660.847,209.938,1270.51,5489.79,4693.49,2555.87,1.55455622562476,-4.91076229298191,17
258.136,6832.66,743.312,1064.84,-23.2014,122.519,255.349,2822.79,-9.685,108.635,6804.9,2.42483323354818,10.3317675980487,27
304.086,5551.46,1085.68,620.198,109.967,77.2507,255.835,3105,372.387,62.6895,9191.99,2.40718960671604,10.8092315209868,27
155.774,564.795,43.6984,645.736,95.8105,73.6313,-251.17,321.958,-21.5761,230.891,2830.82,-22.4387469317615,17.7137315348081,16
95.9567,470.313,106.912,760.292,-22.6906,128.437,2167.49,731.593,241.576,218.178,8783.47,-0.611068661799435,-22.3622562788762,6
126.813,872.518,1101.77,814.983,-77.4502,-122.005,114.121,2420.88,625.266,342.812,20003.9,20.7965551539545,26.2784132399443,14
39.1771,241.002,329.421,866.477,42.1099,-184.937,116.461,891.549,468.968,66.514,20776.2,27.1994994882871,21.412162145418,14
285.063,305.154,55.97,4426.56,-132.355,260.531,4814,311.779,356.49,193.342,359.06,10.4021975514496,-35.0588345334664,24
83.6327,411.848,552.078,131.45,82.4377,-9.39191,679.23,1485.91,106.777,791.316,15869.7,11.3331836992316,24.9409742485923,2
300.218,321.12,122.117,1933.83,32.322,870.996,3805.53,136.005,327.814,276.057,278.251,6.24887383804339,-36.4642348762688,21
371.108,329.327,147.534,1309.05,64.8487,1607,2728.28,728.842,199.551,260.624,1207.41,-4.62547182809556,-36.1591079663462,21
132.446,367.742,511.633,571.28,8.98542,63.856,1448.95,1466.09,-48.4678,596.532,3976.72,-16.9237718840063,-26.621108959831,6
203.653,3542.41,19.929,1452.39,81.1857,18.2212,2794.68,57.2342,230.417,407.306,17093.2,20.2021275527481,4.59620458569511,26
239.615,371.994,113.836,964.329,-40.9454,83.7028,11663,458.535,250.896,301.55,3710.4,18.1900093574503,-38.4766724172009,11
237.84,5081.26,856.859,1416.28,26.8414,-4.84885,-236.306,3189,-208.576,158.781,8446.07,2.97038764221937,10.7750547837478,27
136.07,335.553,119.645,416.824,66.0012,-61.2558,2327.53,442.758,607.032,18562.8,-251.391,15.0014107947436,-23.1565343359636,5
129.131,1734.75,934.834,231.397,-73.3737,-142.693,72.7804,2225.59,1088.79,-48.8884,23446.5,25.8703982691863,20.2446201297564,14
164.251,843.095,1510.91,-110.248,109.633,-135.433,1069.25,2131.2,902.447,577.455,22969.8,22.4779192656637,14.642254396838,14
177.905,208.233,91.4244,1069.28,-17.0089,148.95,3577.85,420.811,-75.1211,179.813,314.931,3.80931111696565,-38.617566425941,21
191.301,892.065,1645.15,139.371,-19.1627,-57.7445,-401.53,3066.41,976.295,603.494,20846.4,24.5940672123326,29.6995222757786,14
146.911,270.613,126.204,77.2065,9.48628,-13.7968,2538.01,501.607,843.397,724.784,10537.6,5.90662128487393,-20.8122458252626,6
524.651,748.256,194.157,9718.99,66.9292,1618.77,6757.62,986.062,282.684,4134.14,766.08,14.6610774943527,-35.8207911321876,24
304.675,4888.04,22.0998,601.588,42.0329,-73.5006,904.172,265.15,323.243,385.968,18819.1,5.42605864696503,11.2699855392873,27
146.2,290.22,96.501,705.417,32.4574,311.919,8323.99,317.846,290.799,99.2556,1379.14,16.4255267255227,-38.9129984248871,11
228.353,740.885,1345.63,-15.2354,56.2936,944.851,735.026,2164.39,947.552,554.736,17236.9,13.4925572168439,23.5018572834115,14
162.978,391.334,6294.71,562.306,15.1764,122.053,288.73,2889.26,348.92,189.663,5171.93,0.816559167375204,23.6202241009183,22
141.59,628.781,99.5505,10558.1,-0.64729,934.363,5380.03,565.637,-77.6268,314.262,890.174,10.1129643451222,-37.712246040731,24
110.086,4023.24,232.024,703.818,17.9124,530.197,689.307,3.39894,37.0255,-53.1032,1222.9,-1.56605820057713,14.6243254843684,4
272.669,3640.98,2178.81,301.236,-122.765,139.086,531.395,3324.13,15540,420.494,2534.53,-3.14649270573296,4.01209586436151,15
37.2801,770.725,689.431,693.744,65.4131,-89.3271,664.658,1398.11,210.546,103.893,13655.8,8.41813315354711,25.2130107786488,14
650.611,414.825,457.018,-67.4038,82.8177,-264.523,462.67,2169.7,298.466,848.86,29261.6,28.8148107431486,6.99186936599055,1
-43.13,215.206,243.19,581.092,64.0302,24.7749,348.284,1752.16,192.351,174.069,4475.6,-18.9183497312033,19.6172257781963,28
152.183,554.169,101.641,2460.85,-16.7687,985.684,147.079,137.231,330.365,145.09,2088.47,-23.5639401602262,9.70997024829888,23
309.473,530.289,305.987,801.611,-41.7584,205.586,903.122,1016.35,236.636,299.684,1835.58,-19.772027798771,-14.7545594426483,28
214.685,317.487,295.128,1117.84,105.249,324.621,877.014,1840.52,513.884,-58.6948,2981.15,-24.6951891527958,-13.5740576958033,28
39.9603,1342.29,15143.3,727.28,-175.926,5.34524,548.695,3392.23,193.424,702.395,18722.6,21.4768559720416,8.20519215026485,22
50.8171,368.798,91.8536,824.394,-136.681,160.793,238.926,199.492,320.922,53.7144,1377.59,-25.1235644801216,12.4750128611719,16
200.121,561.794,21.4562,1238.56,-66.9615,-146.312,1819.76,252.801,276.511,313.898,16007,17.6516570161124,3.4503069508578,20
110.595,1340.94,1419.5,243.503,202.083,-79.4872,471.034,2793.68,1047.55,263.845,12733.4,4.83530809841049,24.8775674812039,2
271.738,221.741,-20.7744,158.33,-0.167695,261.409,1914.98,493.934,823.872,11395.4,887.049,11.4007572098128,-23.7089185764861,5
164.939,547.334,53.1713,987.034,12.9924,782.177,112.444,755.95,324.42,250.975,1378.09,-34.1734339712078,10.6073784197154,16
125.901,378.421,612.021,316.961,161.185,280.119,1938.16,2307.95,1425.5,94.3597,1606.73,-22.2814318103044,-26.9412083333061,21
270.179,328.947,221.759,970.066,-98.0373,592.541,2299.22,1356.92,292.647,128.349,806.659,-11.5181173525317,-34.8575185508957,21
140.972,1244.67,85.1229,607.346,-77.1435,54.0072,531.866,145.775,35.4957,828.252,7032.31,-6.51472508892168,17.6357251073904,20
210.824,4036.97,760.174,210.553,-29.7816,-3.6147,394.772,2268.85,1197.7,233.04,17942.8,6.01274156088188,15.225727925962,27
109.157,401.58,-47.7389,1945.79,-113.518,69.2415,5305.05,836.943,-92.6656,203.113,250.558,12.1853284296696,-37.7590119357019,11
376.515,315.069,356.815,1030.53,-3.41721,293.45,1941.86,2098.22,-27.2241,309.604,334.504,-14.4450846130965,-31.4952303735821,21
109.395,554.81,1098.33,1111.31,1.44108,-198.409,401.882,1697.85,-111.098,58.5941,21461.6,26.4410425195092,21.29806149442,14
91.9494,755.416,887.684,612.643,17.5952,-20.5213,219.685,1874.82,183.323,354.204,15102.3,10.1793855718844,30.4381490955802,14
183.909,292.37,135.011,114.413,-40.7269,97.7708,585.608,284.062,1144.34,3186.55,729.647,-5.56409707104434,-4.17792477580966,17
103.965,131.383,143.507,1147.35,41.9291,1086.94,4499.3,337.592,-5.30084,226.569,625.87,9.20821178826278,-37.7725031645288,11
145.402,256.993,104.861,648.973,-78.5707,334.284,2361.37,332.918,403.925,49.9018,498.787,-8.86188500363411,-36.692161532373,18
85.0669,1004.32,5.063,825.482,-45.1348,20.2726,2682.69,438.454,199.436,152.438,42801.3,32.4728851041164,-0.716177450190152,26
195.854,275.273,146.905,130.684,20.069,314.965,440.302,100.943,2405.61,5050.86,1121.52,4.9011242310898,-15.1340856533178,17
240.564,361.494,66.208,4127.85,-55.9339,1337.62,1385.6,1810.93,326.084,4996.04,12.8744,8.30180807643443,-22.037237168446,24
95.1263,1810.86,187.276,-8.99486,54.2138,179.445,606.725,95.1074,311.209,3960.11,11248.6,3.93024054778488,12.4420857700187,20
148.53,547.304,702.509,585.986,33.0052,24.7565,500.699,1980.23,381.216,-22.4832,10338.4,0.0275133994480064,28.8182245739895,14
152.915,384.047,76.519,572.464,92.641,84.6805,1900.31,31.5411,159.086,144.477,1494.31,-10.4553307653229,-29.3423403680834,18
118.134,1865.89,1301.46,294.466,2.88386,327.432,362.91,2333.3,1600.07,75.526,14485.7,3.58022549604115,21.6356069479585,14
243.752,294.47,188.914,656.089,-30.1167,894.198,3308.52,2853.42,-128.929,229.854,259.147,-2.78235240481227,-39.8840983302964,21
148.47,279.956,103.561,163.643,-30.463,1165.78,853.978,148.221,406.145,1332.58,374.575,-14.5161274347358,-5.91099261959523,7
517.731,219.278,60.3191,729.676,137.621,-7.11338,5838.74,726.39,113.904,289.322,21211.2,27.7183119240108,-7.19150175743,10
135.883,437.64,564.183,22.4478,-24.6261,34.996,4148.51,1707.54,1035.54,-53.5478,15174.9,24.8848050676308,-5.00129084251016,10
57.0741,564.184,93.2307,3335.07,-149.487,140.828,982.221,375.117,-115.483,305.421,1804.41,-13.5875559607127,-16.0708234372524,23
130.137,218.329,98.2661,904.481,57.6343,280.932,4199.11,477.948,172.896,148.298,497.259,7.23978675882702,-38.5206756602094,21
49.8822,477.007,469.905,659.393,-8.67603,-54.5221,300.757,1290.16,381.347,269.699,17083.8,14.0584247696102,28.1623222139337,14
183.793,631.603,812.562,1359.3,-62.0756,-196.187,-48.2896,1662.98,-24.1202,202.301,23833.5,28.7886913508975,22.9713071593193,14
232.387,746.361,322.182,-35.7481,27.9073,133.746,318.286,637.208,1323.61,449.205,243.654,-20.3984770809024,4.76486470446492,19
123.877,658.859,305.238,786.153,27.6366,-51.6972,491.331,1838.85,90.7175,167.186,894.284,-39.1426776244602,-4.7994204462381,28
98.7536,138.188,90.3731,173.487,20.9333,344.981,1090.44,453.598,2111.62,165.699,3179.56,-13.8609708980099,-15.5683248470125,19
130.294,2430.06,461.368,70.434,10.2136,32.8989,-198.896,2346.03,1787.87,172.465,17590.2,6.56720212537565,20.1986562501724,27
257.428,2746.45,21.4466,332.413,-24.4438,-37.7065,1778.97,449.393,-51.0766,1560.59,10597.9,9.51720016517665,8.17989970828873,20
75.8158,3021.64,374.875,637.582,-83.7792,-62.5353,-18.9329,1341.92,212.015,119.406,10892,0.724599063603518,14.5529645676474,27
188.066,344.438,73.7104,337.374,37.483,-97.9886,988.064,737.988,3553.34,10444.8,1248.7,12.3270770314231,-17.4497313323293,17
217.033,287.308,100.357,358.576,128.155,35.8544,739.125,421.791,270.022,2958.12,9082.38,0.580122013860692,5.44465743001336,13
55.7392,252.518,123.859,644.351,-35.3337,233.783,2638.76,-28.9573,251.338,79.8576,13086.3,19.0960348986253,-5.13734347892361,10
133.209,3591.07,746.385,233.971,-84.1582,7.64631,45.8771,2656.04,1118.76,669.159,6150.28,0.695026825341808,11.0301188594951,27
290.906,422.114,-2.78345,34395.5,108.927,1538.56,1696.35,1196.45,-263.693,13055.8,157.542,6.69575464152455,-23.950745238674,24
140.902,1071.03,-75.8732,613.935,51.1687,-44.9801,576.861,262.814,131.236,233.213,6199.71,-10.6191379060159,15.7739895029976,20
203.252,206.022,26.4416,885.579,-20.8617,285.582,39.3108,427.618,-210.354,2164.62,4397.64,-14.3050365177879,10.3570406137784,13
354.507,488.725,149.179,695.403,-80.6743,123.058,3846.32,224.526,370.893,102.043,1352.15,5.22603573451863,-38.3132367588095,21
13.402,269.832,76.1336,99.5669,13.3894,394.934,1428.43,497.493,401.074,759.151,5533.73,-10.0680601645606,-20.1717499244803,12
1.70621,312.562,10.4652,623.661,-79.2568,591.721,8493.29,234.801,55.1271,248.638,-14.9718,16.1376296214692,-39.6319057697188,11
108.081,948.404,540.622,565.379,187.298,-19.7178,202.769,2145.21,666.811,294.018,15686.5,12.9876605039762,29.0996391503029,14
121.583,869.745,319.368,247.033,30.3563,-105.746,83.6617,1572.8,1041.42,558.981,20109.1,20.8350332644114,25.9920428791253,14
27.5405,553.819,293.473,627.47,9.45572,-11.1853,-145.997,1174.69,451.165,225.033,15603.7,9.61410888809565,32.9724507980592,14
145.458,966.821,997.794,242.478,-27.7509,-40.4383,860.863,1932.98,1924.99,105.753,11485.9,1.80820851649742,20.8701182764177,2
39.0241,402.832,45.237,1101.7,50.1379,179.391,2465.07,251.826,-57.1744,196.69,6564.69,-2.32816414649986,-32.1143896389864,6
195.397,434.721,634.948,-62.103,101.906,-117.401,27.2652,2380.57,439.621,8315.84,15094.7,13.2755168899561,-6.84321095436832,13
95.8879,171.896,379.772,673.24,-96.5123,-13.0925,180.475,532.055,375.921,314.815,1411.03,-26.5110344362394,10.5301485764743,16
210.918,418.224,224.498,554.976,26.1627,-233.58,2168.79,1174.41,180.618,65.8378,31690.9,27.9093342593623,3.24902288885792,26
260.246,250.271,192.605,1568.76,-169.468,328.816,11578.5,451.555,-2.70607,193.723,500.242,18.3802553669663,-40.0828980708831,11
119.126,351.819,98.6152,39.5726,88.7066,315.983,3587.34,805.08,377.101,701.139,12975.3,21.7478285169303,-10.4993853007959,10
97.7971,286.331,343.167,139.805,-33.9837,84.342,395.144,536.721,2908.4,576.435,330.105,-13.7693623030066,5.5411727349887,15
142.314,333.686,118.515,623.67,22.4075,751.005,1792.68,842.476,344.826,86.2868,16705.9,15.861114845173,4.83266838266051,20
328.43,1020.83,1092.67,175.646,16.7871,-36.8661,833.457,2309.43,1063.86,499.845,19944.6,17.7528668159743,19.8579972412981,14
171.459,295.579,631.42,222.401,-2.32597,-79.2522,342.047,1844.63,728.213,829.364,19817.8,18.5206034449646,24.2749342239477,14
168.594,286.86,107.389,-0.663626,19.352,443.177,160.948,616.342,513.166,752.614,-123.983,-21.3701245372926,7.03716782871054,19
195.234,2169.98,59.0722,738.933,133.916,171.7,607.976,302.796,76.8032,335.277,3487.07,-4.06582210755287,14.0537553583449,4
135.395,798.654,935.046,278.826,-1.31489,-148.955,-234.343,1376.9,773.621,1082.91,20853.8,23.9788148750929,29.2500729310719,14
73.8004,392.007,731.413,608.065,47.4611,-71.1406,-78.436,1943.42,284.31,290.956,21873.3,24.1856360940326,26.0410660038445,14
166.196,1220.5,-46.6136,764.689,-12.2233,289.209,330.559,222.835,74.0782,27.5551,2325.62,-13.4329857118743,13.8583874491449,16
420.739,333.7,228.429,713.852,27.4096,257.245,652.182,960.912,182.947,285.439,-162.044,-17.2353579155778,-9.60060214543244,25
87.0003,333.089,990.38,175.547,29.2641,56.9374,295.778,2005.33,3786.32,343.864,12990.4,0.99513708879556,25.5363768570054,15
157.459,639.464,1253.53,205.65,-38.5403,-130.274,80.7617,2306.09,1847.63,1731.93,18095.1,15.4291918904844,29.199146123878,13
105.062,282.876,1151.31,144.893,65.9782,124.768,664.481,2167.08,447.924,858.934,11820.7,3.7135984583032,26.3236756544063,2
108.417,1980.67,819.684,805.817,4.7006,-158.049,1241.36,2694.78,231.504,210.262,18340.4,14.5882021672345,17.2118802776804,14
315.021,529.881,-2.31552,701.828,-8.3373,-41.0518,8869.85,660.951,217.054,86.6541,3412.52,17.1261138671779,-39.5402693520376,11
70.5926,186.505,935.732,140.153,-17.9177,12.3308,266.331,2338.28,346.94,776.879,17909.5,14.5626116368646,28.1865293291939,14
224.668,1664.75,718.735,261.08,-29.5978,-84.8423,48.5869,2261.22,970.442,1798.17,19137.9,14.4010716639626,24.3749211987671,13
216.254,697.914,78.1242,732.563,-56.3944,266.932,1712.19,283.397,164.575,151.648,2417.97,-13.5679276282936,-29.2286598454701,6
144.335,213.878,82.6521,120.426,6.09564,742.19,2091.35,1794.53,376.565,1580.26,41.4706,-12.9175985292827,-31.6469139958918,21
225.42,1046.22,1109.99,101.065,20.5995,-71.3267,199.834,2474.65,861.596,1206.76,18223.9,15.7641370822285,26.2230457523804,14
200.037,259.309,177.695,80.885,0.750602,94.074,-113.724,221.468,1767.95,361.681,504.584,-21.0305609830691,12.6321885094335,19
335.003,1952.3,43.9158,559.688,47.1137,387.055,38.8876,225.982,95.8587,168.702,962.773,-7.87038880000746,12.2482496110638,4
149.126,1451.48,1013.57,14.424,33.2071,-29.5111,175.974,1677.07,829.176,804.221,19965.7,18.9097838658851,23.3785879709076,14
353.57,209.458,114.91,1232.13,-6.76528,179.371,4182.91,448.17,24.8001,267.305,2127.76,6.78130583661971,-39.1215007747119,21
181.062,395.969,212.61,576.61,67.6362,1.48861,432.677,1493,418.411,197.904,1528.93,-34.7504714289287,0.0688637135695244,28
204.506,724.294,316.257,633.861,89.095,173.35,7503.62,2086.15,-226.628,159.83,750.809,16.3614072176987,-39.3097949978476,11
161.162,3290.57,392.1,1099.45,-60.3107,186.464,-167.308,1853.98,-32.2106,157.544,1079.17,-1.36317333286584,12.5873093258323,28
127.313,556.5,79.0024,33.3727,-57.0501,-44.236,1154.72,471,390.303,732.18,15766.4,16.341178517003,8.40620113263365,20
42.6193,545.309,299.706,118.944,-38.5507,-1.09256,4590.42,-139.776,17801.3,415.278,20872.2,25.2718043687991,-9.55559964739379,15
110.545,346.511,-21.4564,2290.57,21.2153,161.113,377.505,2884.97,-168.73,452.797,3793.68,-14.913247426972,12.6247706226807,2
41.796,230.408,192.953,903.05,-8.70408,565.41,2275.11,532.119,-77.2831,229.584,1412.52,-9.24618638152567,-34.9708054719269,18
211.125,554.087,325.564,550.874,36.8998,147.455,425.78,2704.82,1196.76,190.573,357.138,-40.8317652373554,-5.77603699816448,19
74.7509,2696.45,689.038,26.4878,125.191,138.232,30.0772,2432.45,497.761,928.605,16687.2,5.59897119369738,19.9125740771206,27
341.145,406.588,70.8785,2234.09,-39.9968,-57.5968,8761.57,511.758,220.764,177.313,21382.4,26.5504924865768,-16.546776119267,10
204.632,774.363,860.162,145.075,-14.0995,40.044,124.752,2691.24,934.274,1485.02,22018.6,23.3904401153997,24.2495672144568,14
321.958,393.584,45.0409,5909.45,-43.8103,1186.98,9988.11,564.662,525.169,6737.04,-625.932,16.5408559327225,-36.8147328318978,11
186.82,261.182,218.1,663.657,-87.3554,130.716,304.007,1464.48,278.345,124.915,532.881,-37.9148225019119,0.314289553317959,28
172.205,239.034,213.853,213.644,15.7385,68.6334,-157.903,1840.05,1141.67,901.032,667.137,-41.6384837993479,5.14912870739547,19
610.856,664.092,179.61,110.29,22.785,531.435,3371.43,374.713,1660.14,2090.13,37490.6,30.8352594334007,-1.5873007799849,26
248.206,1784.44,829.785,400.989,52.9784,-85.3972,877.945,2440.93,1199.46,4867.06,7800.98,2.33460399258239,9.89043240114202,13
167.049,414.564,184.019,196.976,64.0661,485.879,-109.292,405.062,1736.88,1361.32,314.055,-15.2188157477871,6.47979056180186,17
55.3205,151.968,90.2278,826.795,39.2231,729.48,653.855,676.822,-44.1765,187.599,508.224,-24.7937936463367,-6.3542995760568,28
155.214,284.042,288.259,590.105,77.0119,292.856,3144.85,2239.94,-118.792,363.733,683.565,-4.22018990890746,-40.0508107826059,21
135.123,241.671,18.5445,121.548,28.5834,303.447,4626.7,438.942,1211.22,1380.99,11537.6,14.4740812957457,-29.7706768705921,10
281.7,1897.36,548.223,360.15,-14.2177,102.052,2962.43,1060.23,3814.76,1357.54,3104.32,-5.38574320401527,-34.2415807495146,6
413.533,265.649,44.1873,1146.3,57.9101,85.3399,4134.13,203.81,8.07239,211.044,7491.93,10.926303320347,-32.8262583047883,10
171.684,369.381,134.651,1446.28,-114.949,812.122,3109.29,674.915,427.45,168.176,273.444,-1.79662019686919,-39.0850349629265,21
98.3508,786.141,859.098,707.309,126.863,-118.837,1047.03,2505.85,230.819,144.074,25423.7,24.9085894515457,13.5072519492492,14
145.488,299.486,430.327,72.5998,146.869,98.4386,1461.13,1964.37,1061.49,167.633,3202.01,-21.0381791887277,-24.3628505539389,21
145.196,1118.79,705.419,323.475,-43.8014,-154.334,139.152,1523.76,2008.72,205.319,22330.6,24.190089758046,23.5711934391853,14
70.3912,818.123,20.1043,642.893,52.4246,208.18,-264.742,316.969,92.0329,309.7,1468.02,-22.7618774958754,16.9214014697176,16
126.567,233.77,3.70705,280.009,23.4741,404.225,3105.27,810.5,234.592,4060.02,-23.3997,1.95136989709033,-34.7850323957103,17
563.747,2471.68,254.092,676.235,-8.05239,172.395,13023.2,1457.61,397.56,143.519,143.449,15.0781363491102,-41.1161248467175,11
131.263,289.969,81.6023,1746.89,-16.8296,1296.61,2632.12,818.209,858.922,10758.1,-672.049,11.1120612700907,-27.210374006004,17
121.363,327.199,122.779,794.439,97.404,220.089,283.961,1442.63,264.082,365.933,1362.37,-40.077452076098,-1.12567048604888,28
220.922,1635.69,221.562,2207.45,-64.8164,1060.88,1209.69,379.979,48.6845,196.187,241.44,-15.5273882582949,-15.306777743942,4
251.455,357.443,65.4527,645.305,-2.00469,737.136,4020.31,1304.67,266.571,144.387,2516.25,5.44156716817508,-40.2226104659389,21
536.811,1439.41,55.4418,1024.82,40.8929,100.828,2186.5,175.347,149.889,7282.62,743.745,7.03636731010207,-29.1554127019077,17
142.299,356.422,109.341,829.519,-71.3132,411.877,1666.99,870.647,24.9443,231.387,-133.642,-16.4433911019595,-28.2761124546014,21
185.338,1262.12,741.474,82.3205,10.2107,-53.8361,122.267,2777.24,529.212,1467.25,18685.4,16.6824161913688,25.9216918545969,14
126.124,781.933,1023.54,80.3179,8.76255,24.7279,76.6805,2519.85,61.3927,944.166,9022.14,-2.26990407093485,31.0582601901323,2
128.635,201.097,42.45,1598.88,-102.179,102.19,4554.49,859.855,449.973,14192,269.294,12.5659156531341,-29.0419418938831,17
110.659,651.134,397.549,1327.99,-137.55,27.6626,451.049,1390.06,211.616,260.762,10318.7,-1.61228501657642,29.9948451079016,2
273.154,833.614,470.485,69.7366,83.6356,-43.3328,-783.52,1805.33,813.71,1340.36,21291.4,23.9978582483397,30.7139885359268,14
223.898,199.784,248.129,688.856,-58.1444,1196.51,5783.04,1183.62,58.6078,406.62,8053.62,14.677701114478,-35.4790764502993,10
116.269,313.8,436.279,792.747,-55.6246,-1.19912,6083.05,1458.01,187.307,201.971,5593.57,15.0038640410588,-36.780618184911,10
145.954,262.205,100.219,960.303,61.0115,115.649,-12.2075,205.587,284.323,116.8,1509.29,-26.4115903688111,13.772895361984,16
186.196,317.532,180.161,607.798,-67.999,68.9221,7573.75,-121.551,560.272,104.329,442.754,15.2175894651639,-38.8192973344339,11
323.473,484.021,95.4177,-6.19818,72.1256,1208.67,4073.63,208.633,416.807,828.332,1240.49,6.71943695066346,-37.9066897914057,11
236.537,172.044,184.86,686.836,52.3569,19.8566,-79.5211,1898.52,-8.70589,380.939,181.024,-38.9750678310849,3.78104917884228,28
207.637,3805,159.028,35.2085,68.0534,124.144,6050.96,420.447,1318.44,313.764,20722.7,27.8174379968383,-7.21648595798345,10
216.183,247.812,106.406,619.513,-1.39268,205.706,1579.78,702.093,102.728,322.626,834.38,-15.687338236383,-26.6343825691649,18
61.7558,2071.49,1077.42,-7.78683,-20.7428,148.398,653.317,2495.65,1195.09,897.869,19207.3,13.6333614074604,19.4284560963866,14
42.7449,1093.48,902.392,-67.4936,72.1018,-122.597,911.625,1857.62,1313.39,541.629,21526.8,20.2989907389345,17.4544749900214,14
221.304,400.307,85.9541,41.3366,57.6891,1518.08,5790.87,734.681,996.28,1239.69,9764.61,14.4831844085005,-34.6444794135453,10
891.882,990.688,131.195,793.981,-94.2057,942.985,3045.16,892.79,-25.4771,233.242,2579.4,-0.299536144942209,-38.1909045138654,9
9.16334,332.306,52.9101,127.756,10.7316,337.678,85.672,390.766,693.08,946.613,1358.26,-19.1919096768358,11.4851237059946,19
205.098,2565.09,882.141,1034.73,-19.9148,-98.5995,366.103,2058.1,279.552,501.118,13942.4,2.07362017132498,20.3239639940147,27
214.594,403.671,53.0387,1199.93,39.5171,50.4152,1096.15,211.599,-0.284414,290.835,1398.12,-15.7993786422072,-16.1595055964302,18
214.074,1059.88,125.38,182.197,144.825,478.84,2921.96,733.146,1510.46,1367.02,1303.08,-3.47291159265014,-37.2507374892084,6
317.798,662.428,271.245,747.788,7.99264,109.196,1018.44,1123.46,225.819,36.6712,282.365,-18.3968200772047,-17.1734980955855,18
155.348,569.423,473.529,1025.4,267.881,144.675,269.778,2560.59,247.347,177.167,2033.88,-35.2635743817278,-0.669634379676089,28
158.533,563.145,405.942,656.078,43.2192,-109.954,-427.497,2707.85,135.818,276.12,10328,-0.195986246631503,33.5899524487361,2
82.0148,286.312,541.643,1425.88,-53.8545,202.68,1738.46,1488.54,233.86,362.756,504.377,-17.2928072224794,-31.1098493477545,21
124.401,228.022,128.648,829.123,58.7543,255.554,2745.23,1855.13,124.193,255.492,9755.97,7.03611058766388,-15.6826880911671,20
131.039,8777.13,336.802,234.19,59.5006,57.8827,-256.316,2164.82,3648.86,3315.44,5345.85,1.24402536811968,13.0527079506347,27
373.265,1069.87,488.93,1273.62,-31.452,27.688,1145.2,2368.29,713.421,263.052,542.678,-18.0653802776798,-17.3112575689563,28
138.39,371.272,819.091,-48.1256,31.1779,-5.10625,-260.283,2566.35,1315.2,242.422,19405.6,20.146007571582,30.8696229361992,14
129.483,218.968,2.80211,1313.16,41.4272,284.594,1696.41,1499.82,49.268,4.14821,327.754,-17.8992331181603,-29.0998065674875,21
143.77,1650.36,1256.97,822.47,68.1789,-137.433,1144.77,1781.13,459.403,22.6275,23770.3,24.3327757497427,11.6310646026539,14
138.031,1725.62,63.8392,872.684,44.8869,-6.12759,2042.37,185.053,354.158,178.517,19909.7,22.1902372060513,3.75616854965992,26
138.681,2787.73,177.793,696.137,59.6614,1270.39,1269.19,2722.87,-147.537,233.563,888.442,-6.73570027215456,-0.282723552161622,28
331.266,332.698,132.421,807.448,3.55157,390.135,2835.85,825.65,303.504,169.989,8228.69,2.23898735431049,-30.7379004870846,10
113.839,1860.53,107.701,696.883,123.002,106.379,326.413,271.742,398.597,102.752,3236.59,-6.83811615134097,14.7667823546475,4
113.835,255.509,165.876,1537.08,-6.95876,245.596,3018.38,221.318,164.173,65.9138,613.233,-2.04746086283377,-38.118091875452,21
69.1949,1156.31,250.742,683.007,-39.9089,117.521,133.974,2047.88,297.562,70.4879,2722.99,-20.1315274742691,16.7076928509283,28
152.633,247.41,83.4663,558.541,25.155,334.763,1982.32,210.553,0.0455811,129.42,4125.69,-8.78645835138122,-32.1590771132688,6
71.5414,2268.53,493.118,104.576,32.6391,509.719,-53.4512,3370.41,1365.47,30.5668,549.24,-2.15974392674799,9.70479281083629,28
211.653,321.797,413.683,721.813,79.7231,387.339,999.921,1800.68,73.6626,355.842,-156.074,-23.7011899623446,-18.5875498198256,28
108.095,1075.69,3.51376,1604.88,260.438,164.473,2054.85,409.418,26.6172,3626.13,1404.74,1.46029714748691,-26.405694764963,17
154.987,360.89,104.033,235.081,41.712,1478.57,1697.23,378.577,256.757,2220.79,-122.183,-10.8832552746972,-24.5892440801089,17
203.815,4700.72,657.031,133.196,196.012,57.0175,1057.08,2530.09,2524.58,2838.28,18142.2,-0.978995378356733,19.1998120047924,27
139.515,362.261,278.804,857.981,2.04139,1165.19,2901.73,1168.73,201.246,286.988,135.641,-5.13536462249775,-39.4710860273022,21
281.613,283.896,37.2771,1878.05,73.5968,218.561,1244.97,268.494,155.953,104.201,4390.8,-11.9852756016773,-18.1633387478902,23
121.111,319.637,360.87,187.068,-60.7894,202.135,938.142,2034.29,2053.49,405.848,960.833,-32.9284868473102,-14.5945631522529,19
62.142,307.712,220.066,12.7868,92.2617,856.203,8749.27,1418.27,2596.34,3830.94,2149.87,16.016736379178,-38.9359813027345,11
464.048,278.541,257.952,601.817,-5.03947,200.703,3150.16,1336.64,566.156,166.066,4604.73,-0.736491829160475,-39.1347370916069,10
136.263,304.495,143.228,673.314,-32.3576,265.228,1465.59,2121.58,90.1816,428.895,-7.43404,-20.5806219965286,-24.5102689950264,28
452.114,6885.81,139.202,1574.7,103.167,116.115,194.152,243.663,159.84,107.393,5547.34,-1.4396977965374,16.5213710722925,27
85.2413,417.108,10.9387,189.43,-48.0818,57.7606,1264.83,790.279,2176.52,3421.7,9995.99,3.11751146972,-0.112722899091047,13
148.165,1677.84,588.315,129.443,64.3585,64.6035,219.624,1916.31,1213.08,466.121,17957.6,11.3768967195955,22.5168527264978,14
160.843,282.876,132.938,740.704,15.0571,315.138,259.002,1832.51,260.021,241.363,21.142,-40.4403174970864,-2.58555664238616,28
193.827,903.529,1618.46,163.881,1.28358,-76.4431,143.718,3260.23,351.352,727.434,19646.7,20.598123571001,25.825068230308,14
111.576,252.888,133.733,2199.97,68.947,102.454,1068.98,2359.07,-198.867,192.782,278.879,-21.9646997024763,-18.620797391869,28
195.965,237.178,63.136,100.295,77.1913,131.436,-41.7141,397.802,536.446,950.947,9238.08,-10.1231767843095,22.240043575077,7
119.499,398.329,64.9628,35.6777,33.1071,-680.12,722.328,361.116,-337.269,29906,12568.8,18.3771030794331,-21.0153342922832,5
38.7478,1394.93,-23.5138,1816.91,165.227,130.371,1264.74,425.655,-25.36,165.282,2315.13,-13.973917118767,-12.9158663073788,18
187.449,1016.63,628.557,29.0151,58.5119,-25.8754,309.079,1885.82,976.857,259.41,19058.8,17.4451246606477,24.0641053297362,14
151.12,822.984,366.592,734.721,39.9348,16.5477,144.595,1604.11,40.8919,294.054,13671.7,6.04875590436818,29.3765145541102,14
39.7436,5068.53,36.1057,555.667,63.6961,-43.7703,1436.49,321.912,214.114,158.547,17843.1,7.10683405850293,9.19169579057948,27
630.175,284.682,60.4871,1685.78,-70.7256,120.739,3985.32,409.128,-28.1748,73.8081,1705.44,6.74124483078319,-36.8381282826607,9
175.088,1132.68,888.946,128.091,75.0221,401.725,255.133,2213.98,2005.39,667.693,16349.4,8.85847313047451,25.6868456996544,14
125.352,403.995,649.105,553.725,158.986,85.4274,3087.18,3716.73,103.586,160.187,2282.02,-8.56280345919912,-40.5564783306773,21
213.612,1860.94,87.8667,2396.39,364.675,22.7456,469.902,345.585,343.263,312.948,9177.22,-6.59786010750183,19.5477006821397,20
304.761,614.201,84.4977,1497.2,-33.4305,188.243,-192.852,69.6647,156.741,290.532,802.82,-21.1233627487961,9.11039138611516,16
193.748,1082.25,960.773,117.698,-45.9873,745.573,288.799,1789.94,923.345,531.886,16859.8,12.0798095943224,25.9856016719163,14
146.013,382.27,378.289,1113.07,125.35,111.518,385.676,2126.9,254.231,571.314,930.629,-37.8643268952549,-6.99576332722348,28
299.806,741.936,1328.77,617.901,-28.905,-34.0573,810.139,2871.17,445.349,212.742,19112.2,16.303856488752,20.8381708348418,14
86.1886,280.973,146.583,895.446,17.6411,1441.5,2217.17,423.846,295.547,325.1,59.5255,-10.0269561145669,-34.7048644001941,18
181.866,20298.8,251984,39661.9,-9338.09,-155.691,11530,19220.4,-8786.53,782.207,19499.1,33.0539088028983,-22.9561063110209,22
181.01,375.922,74.0522,615.071,20.8535,127.575,2703.01,485.517,101.945,82.0562,8921.06,4.44571016830329,-25.5780361845737,10
158.184,1401.28,1328.7,-166.444,108.911,-153.674,154.584,2978.56,948.585,724.081,26007.9,29.1831371421832,16.9394925286539,14
89.506,799.059,851.842,381.251,-37.6009,-47.1587,-456.394,2411.66,1512.55,1080.58,22467.3,27.0630129261579,29.6037995983243,14
196.716,339.066,141.753,67.9268,85.6315,97.6747,3448.25,554.521,559.068,774.495,686.096,2.50533907766702,-39.1545013492189,6
20.1176,629.539,160.173,562.069,181.536,64.3288,419.407,192.969,288.485,391.342,12204.3,-0.648319143061734,22.6281824661911,20
119.274,389.33,439.692,113.842,-40.2959,-77.6359,141.784,1524.26,1060.04,582.289,18195.9,18.5890561130141,26.4536124047509,14
128.316,757.866,1181.72,-70.0183,143.155,-92.2294,577.963,2036.54,279.442,994.015,24056.6,25.2868387064156,17.4197578794918,14
177.097,269.179,95.1543,1110.93,16.858,377.483,1202.73,172.502,424.861,238.656,509.236,-16.4135866900873,-18.3764343145432,18
229.652,1039.97,2019.43,6.54407,37.3468,73.3742,-169.745,4242.63,422.37,788.88,16498.1,14.6872222434948,30.8543518749124,14
141.963,1209.94,686.319,1109.95,-22.5799,-147.778,317.712,1713.38,563.763,205.281,19751.8,19.9542610693458,24.7955727294247,14
355.104,284.503,-4.47687,678.556,45.4062,165.045,2594.58,650.094,-3.44839,202.81,25035.8,25.1808450289111,2.07925147879017,26
92.7718,326.471,174.539,217.65,19.8538,283.808,8433.47,211.759,325.914,1606.12,5411.39,16.6405003874374,-37.1837708964661,11
480.629,1610.14,-13.1852,276.3,-27.3132,144.334,252.952,309.251,668.922,944.291,4243.62,-7.19088261036258,12.6330519786541,4
84.2663,209.311,66.1985,3575.63,-80.5719,418.214,1.48004,344.583,48.9166,88.5665,604.611,-14.3473430828312,-4.17544693816579,23
88.2729,2560.74,928.403,578.128,-5.49288,-244.729,182.246,2174.4,642.007,340.599,19198.6,11.4964568439881,18.8022726741572,27
161.144,1289.25,1079.93,166.996,25.3668,400.903,48.901,2961.11,1055.37,445.915,21972.1,26.4543991358205,25.7782821759286,14
225.649,271.903,218.556,3800.78,248.482,250.602,2380.76,894.29,396.442,206.522,2853.74,-4.47320849759153,-29.9847876775591,23
234.933,732.254,658.171,382.573,5.0385,642.488,6420.16,2816.06,3087.93,3106.63,4120.4,14.763010345421,-37.4790856059383,11
329.546,316.22,80.2568,373.465,14.2293,189.439,1227.5,931.877,986.299,1473.62,547.112,-15.4377625543587,-18.8364640918202,21
140.184,166.457,52.5077,2130.29,-141.703,303.44,2722.09,1194.7,35.4883,370.658,6370.58,-2.58713902011019,-33.3422164077262,10
20.2842,529.325,76872,1816.33,-382.946,211.898,2823.77,-384.619,194.228,-6.1472,1569.09,35.1144030710296,-21.9594590778958,22
219.032,1402.08,243.455,2373.25,-64.1575,62.9952,10206.7,1384.28,-6.87626,327.236,620.368,17.7147283795983,-40.8184776129493,11
507.477,186.087,57.9758,584.12,-14.4047,599.416,6862.88,596.635,175.618,233.893,4632.71,15.032599487006,-38.7224665729642,11
442.199,484.293,74.8233,5586.82,-71.8671,760.404,2734.02,680.825,19.636,13349.6,-18.771,10.1160645082351,-24.0821421876208,17
148.333,891.775,1200.65,70.9626,85.7708,-205.095,-31.3281,2270.39,899.018,424.76,22885.2,26.747812393296,23.9358657485417,14
184.61,1130.56,857.88,292.646,52.8474,-301.938,-151.227,1700.55,883.841,1504.51,18480.4,16.416614970112,28.9243929737072,14
119.469,259.829,336.245,3703.87,-99.3038,186.388,73.62,1914.24,-36.3787,329.798,143.615,-17.6564725645687,-5.7918588188387,23
991.962,734.972,378.573,506.351,203.83,-208.918,280.99,2708.57,3634.14,3722.16,14874,5.20055847378909,10.0244438173457,13
472.873,600.97,146.73,581.94,-1.61498,282.348,10040.3,854.221,92.5414,619.412,1893.34,17.28589105295,-38.6772716237209,11
153.052,537.571,213.629,55.7735,-27.9919,171.4,208.947,2387.64,113.929,1463.56,152.826,-38.9914384236288,-1.34086662312099,19
93.368,136.033,343.687,564.403,-28.6513,1396.74,3050.48,1944.78,144.824,298.808,552.553,-5.18650679142432,-40.9710419031272,21
190.981,246.27,242.949,679.236,-14.6118,245.484,1820.04,2412.39,-62.1854,299.276,-96.4305,-18.0528256635996,-28.9993058872803,21
144.28,367.18,38.9873,1921.26,-64.5769,177.345,1808.44,454.86,42.0438,284.527,783.919,-14.8049369182024,-30.3997784906387,18
415.609,122.405,127.162,1533.6,-26.0435,112.748,860.494,444.016,0.120528,126.428,1358.25,-13.7996763987741,-12.7298905393294,25
114.239,455.372,39.4958,636.976,-33.836,567.064,2402.96,1672,435.035,147.592,2960.83,-10.6475861724538,-38.3618081889242,21
56.4561,678.129,1168.25,8.61331,20.0415,-79.3841,503.913,1998.37,1283.23,518.262,8436.26,-3.79635138023799,26.6843294196475,2
310.585,529.25,92.532,229.525,5.33125,733.639,2771.96,751.543,271.245,2774.94,712.56,-2.35999884185928,-36.1107486942751,17
97.3994,974.891,799.473,827.381,-10.4655,-140.887,-331.206,2330.9,167.445,134.729,22434.6,27.4139491834967,27.2621743507482,14
171.153,716.388,57.2143,727.901,-57.3797,50.3411,482.097,247.011,223.223,28.8556,3186.34,-14.8811789021437,12.4341530222876,16
270.906,349.355,-5.15157,2685.98,190.325,140.177,928.716,742.341,45.2029,218.193,200.386,-17.7954141306265,-18.388831587386,23
110.544,265.152,88.7009,2876.38,159.232,116.777,439.351,184.397,127.839,503.496,15804.1,11.4085625083465,24.217321046761,23
70.9695,1828.67,2043.42,664.164,39.3513,-1.80078,-134.164,3108.79,-36.0932,34.1609,14426.7,8.78077503624024,25.7281807463232,14
70.7964,220.865,267.63,1431.43,23.4602,169.136,480.2,1582.26,311.029,292.336,-24.7088,-35.7322643065716,-7.40006172326178,23
199.054,294.151,136.131,829.151,-54.2784,47.7224,311.601,693.322,129.682,51.392,244.455,-28.4752979068658,3.44397636963212,28
128.368,2992.86,706.732,720.079,-31.0312,-239.388,90.3383,1530.89,573.328,132.627,23557.4,18.4488969454953,16.1845654208714,14
299.142,348.932,259.181,725.333,14.2747,165.857,5363.14,2317.18,737.419,339.864,-39.7894,11.9072103481747,-40.2991226608349,11
215.775,1077.73,575.61,236.386,-24.4579,-9.87504,65.3688,2077.13,897.162,177.794,15716.2,9.11042120950294,27.2532342351226,14
43.8351,837.933,381.443,679.36,73.9514,-60.9579,663.905,1742.65,315.881,203.157,19348.1,18.0388882739244,22.2074967395395,14
191.958,535.334,56.5935,1222.39,43.5508,763.724,7604.41,1110.34,368.462,181.419,400.61,15.8955218262635,-39.0633277489897,11
296.532,543.75,92.7779,4281.58,141.311,1013.76,3330.66,1002.64,1788.74,12929.5,1600.73,10.2903048654021,-27.4274154060743,17
767.414,708.954,171.865,37832.8,785.259,-69.5922,3184.16,396.368,323.26,26443.2,-3186.3,7.08061275605793,-27.9656235223075,24
294.187,556.218,143.202,2737.87,154.218,15.8076,2796.12,115.038,61.2208,5636.52,2090.22,9.2868853880411,-28.1796647990758,17
361.771,362.067,47.1238,763.52,103.629,201.64,4127.92,788.349,454.665,-22.097,415.607,6.58399528069132,-38.8931935980074,21
119.005,377.383,105.774,4.23087,53.5073,236.51,779.384,815.016,-50.7585,750.03,2184.11,-21.2896383462152,-7.14509348533818,21
471.631,372.476,248.05,723.022,2.52512,1112.72,3588.82,2514.87,196.842,295.904,-136.716,1.04899661965437,-40.1549659476039,21
226.181,316.339,129.792,82.7549,16.1958,104.961,2235.99,182.352,413.164,742.058,12991,20.6714362050924,-1.40575790745291,20
240.784,691.551,126.062,812.551,22.7259,228.128,8869.02,758.509,88.8629,147.928,3934.08,17.9637668975484,-39.2477644214828,11
126.767,1023.5,715.738,915.71,69.3166,90.4366,-207.451,2105.35,475.076,232.173,7711.6,-4.34822647745129,29.8000327666919,2
-24.6088,1307.28,1022.18,116.957,-3.86371,-134.193,-46.8271,2285.2,201.298,6074.21,13925.4,9.15863824863024,17.0308539265165,13
36.7601,743.866,59.4798,53.1521,35.8077,50.4536,223.781,347.509,1102.42,105.451,2630.26,-15.3822127074805,14.4870324906897,19
337.462,1477.39,244.824,653.385,0.475407,155.306,365.567,1632,453.254,73.3124,1827.9,-13.2488033566329,10.9554925962171,28
89.3847,1496.32,257.969,132.138,19.0503,129.744,1727.59,1526.59,319.582,789.835,864.359,-14.2778435773345,-23.8431573854747,28
410.794,297.614,147.377,631.869,63.5236,166.852,4480.25,468.042,398.43,-63.9776,1387.23,8.7190368965506,-38.1605440942535,11
27.4044,1108.95,293.199,1114.98,100.664,255.56,124.854,585.801,997.741,880.925,4259.57,-12.1681965858943,18.670119318058,16
-1.99082,191.999,138.127,688.778,131.332,426.612,647.752,547.816,312.248,280.788,1833.12,-25.2755772253626,-3.94051306703743,18
256.284,3906.79,-90.7743,152.876,310.107,46.7794,910.688,560.74,202.313,1041.3,10867.7,2.36750759334983,16.7035128147325,27
109.997,208.41,45.2564,122.134,-3.0131,231.515,595.809,193.349,885.629,1253.73,548.731,-16.806677114404,1.38486358466623,19
227.418,585.184,319.742,93.4131,-27.095,305.628,1328.51,1182.02,892.338,243.707,269.208,-18.431724852825,-22.3705850037431,21
203.448,340.002,107.435,10616.6,490.425,952.689,4620.45,1088.72,414.136,5539.33,-62.2508,11.7897532928566,-28.3311029736022,24
49.2272,296.455,84.3235,743.901,41.602,-3.12514,427.851,350.329,197.173,222.558,4898.38,-16.1872433873334,18.6039830799088,16
202.993,371.738,141.861,960.217,-97.2027,542.618,7820.7,1041.08,13.8124,299.748,1674.18,16.3345085881883,-39.179439396999,11
218.331,703.32,536.09,220.724,24.913,300.133,260.824,2836.87,1021.11,1058.01,17154.5,13.150001211316,27.3182662639422,14
842.067,288.335,70.4686,729.993,-43.3908,149.974,6726.34,871.848,303.952,185.933,1967.17,14.6824823154092,-38.5948455351669,11
97.075,2027.85,807.827,320.717,-55.3344,0.321165,355.204,2185.63,965.952,2098.01,13849.7,1.73902971309345,22.6042102244799,14
1962.36,1372.13,685.204,2107.21,-164.726,21.7526,313.289,2596.4,1148.99,617.351,21650.4,9.33832284042583,-1.73580434614615,25
125.703,259.465,338.508,631.374,-50.9925,523.273,7184.58,1786.33,442.135,290.829,406.988,15.6091185798428,-39.2633260451532,11
[truncated: 12,102 more rows]

## Sheet: HIV+anti-TIGIT
HLADR,"CD38","CCR7","CD107a","TIM3","PD1","TIGIT","CD27","IL2","IFNg","CD45RA","tSNE_V1","tSNE_V2","louvain"
[truncated: 14,810 more rows]

[truncated: 2 more sheets: HIV+IGg1+IGg2, HIV+anti-TIGIT+anti-TIM3]
