# Supplementary material for: Selective loss of CD107a TIGIT+ memory HIV-1-specific CD8+ T cells in PLWH over a decade of ART
Source: eLife. 2023 Sep 19;12:e83737. doi: 10.7554/eLife.83737 (PMC10508883; doi:10.7554/eLife.83737)
Supplement: Figure 5—source data 2. [file elife-83737-fig5-data2.xlsx]

## Sheet: %CD8t_CD107a
Group	Timepoint	IgG2a	αTIGIT	IgG1	αTIM-3	IgG2a+IgG1	αTIGIT+αTIM-3
S1	S1	1.38	0.51	1.13	0.73	0.61	1.93
S1	S2	1.86	1.24	1.86	1.54	1.18	1.5
S10	S1	0.12	2.45	0	0.56	0.05	0.72
S10	S2	0.9	0.84	0.81	0.31	0.47	0.88
S19	S1	0.49	0.5	0.19	0	0.37	0.92
S19	S2	2.51	6.67	5.57	0	2.52	5.17
S20	S1	0.1	3.22	0	0.06	0.13	0.32
S20	S2	0.37	4.86	0.14	0.24	0	0.26
S21	S1	1.98	5.42	0.82	0	0.59	0.93
S21	S2	0.92	0.61	0.28	0.19	0.14	0
S22	S1	2.21	1.26	0.8	0.92	1.83	1.5
S22	S2	4.88	4.11	3.41	2.94	2.89	2.53
S23	S1	0	1.4	0.8	1.4	4.9	4
S23	S2	0.61	1.37	1.47	4.47	5.17	5.87
S3	S1	1.37	0.38	1.19	0	0.69	1.27
S3	S2	0.19	1.05	0.09	1.15	0.74	1.43
S6	S1	0.56	2.07	0.84	0.81	0.59	0.73
S6	S2	0.51	0.34	0.39	0.05	0.48	0.77
S8	S1	1.67	3.88	1.6	1.61	1.71	2.3
S8	S2	1.62	5.68	NA	NA	NA	NA

## Sheet: %CM_CD107a
Group	Timepoint	IgG2a	αTIGIT	IgG1	αTIM-3	IgG2a+IgG1	αTIGIT+αTIM-3
S1	S1	8.33	11.8	0	0	0	10
S1	S2	1.67	2.11	3.33	4.07	2.2	3.04
S10	S1	7.83	17.03	0	8.53	7.63	8.63
S10	S2	1.95	0.62	2.33	1.27	3.86	2.16
S19	S1	5.4	7.6	5.4	16.9	0	6.6
S19	S2	4.4	8.7	9.6	0	9.3	7.3
S20	S1	2.3	16.3	2.2	4.1	4	0.64
S20	S2	0	9.72	0.59	0.52	0.1	0.68
S21	S1	6.52	16.32	4.62	0	2.09	4.92
S21	S2	3.41	6.52	1.98	0.64	0	0.68
S22	S1	1.73	3.8	0.61	3.4	4.8	8
S22	S2	0	3.33	3.53	1.33	3.53	3.03
S23	S1	5.3	5.3	0	3.4	6.7	10.2
S23	S2	0	1.5	2.8	5.2	8.5	9.5
S3	S1	0	0	NA	NA	20	0
S3	S2	2.41	4.63	3.24	3.83	11.13	9.33
S6	S1	8.11	17.5	13.2	0	6.67	13
S6	S2	6.12	5.34	5.59	7.11	4.85	9.86
S8	S1	0	0	0.62	1.02	0.42	1.19
S8	S2	0	11.88	NA	NA	NA	NA

## Sheet: %TM_CD107a
Group	Timepoint	IgG2a	αTIGIT	IgG1	αTIM-3	IgG2a+IgG1	αTIGIT+αTIM-3
S1	S1	3.48	1.59	0	4.55	2.46	5.19
S1	S2	1.86	0.92	1.02	1.37	0.95	1.86
S10	S1	0.51	3.83	2.33	1.73	0.57	3.23
S10	S2	1.25	2.34	2.88	0	2.59	3
S19	S1	2.3	1.5	2.2	0	3	1.3
S19	S2	4.4	11.7	8.9	1	6.6	6.8
S20	S1	3.35	11.73	2.83	3.81	3.77	4.13
S20	S2	0.865	9.995	0.225	0.285	0.375	0.735
S21	S1	2.65	8.46	1.2	0	0.9	2.39
S21	S2	2.76	2.36	0.31	0	0.09	0.13
S22	S1	6.93	3.13	4.13	4.23	4.73	3.43
S22	S2	6.37	5.47	5.07	4.27	4.37	4.37
S23	S1	0	2.6	1.2	1.5	7.6	10.2
S23	S2	0.2	2.5	1.2	6	6.6	9.8
S3	S1	4.65	6.67	2.04	8.51	0	4.44
S3	S2	1.49	2.57	1.04	2.39	1.72	3.14
S6	S1	1.27	5.93	1.58	0.93	0	2.01
S6	S2	3.84	1.23	1.11	0.96	0.25	3.62
S8	S1	0	7.89	2.295	0.835	2.315	2.605
S8	S2	2.115	7.705	NA	NA	NA	NA

## Sheet: %EM_CD107a
Group	Timepoint	IgG2a	αTIGIT	IgG1	αTIM-3	IgG2a+IgG1	αTIGIT+αTIM-3
S1	S1	4	1.9	2.85	2.13	1.24	2.92
S1	S2	2.27	1.89	2.42	2.47	2.58	2.41
S10	S1	0.12	1.71	0.1	0	1.27	0.2
S10	S2	1.29	1.96	1.44	0.28	0.67	1.8
S19	S1	0.51	0.71	0	0.18	0.28	1.53
S19	S2	4.6	9.4	5.2	0.7	5.1	8.4
S20	S1	1.05	5.21	0.78	0.5	0.56	0.99
S20	S2	1.34	7.59	1.15	1.56	0.83	1.51
S21	S1	2.46	5.17	1.24	0	0.79	0.31
S21	S2	0.75	0.59	0.15	0.24	0.08	0
S22	S1	2.33	1.2	1.05	1.15	1.81	0.97
S22	S2	4.1	2.7	2.89	2.23	1.73	1.74
S23	S1	1.6	2.5	2.1	4.6	5.9	6.4
S23	S2	2.32	1.31	1.56	5.31	5.81	8.21
S3	S1	3.96	4.09	2.03	1.41	2.48	0
S3	S2	1.12	1.91	0	3.23	1.14	3.89
S6	S1	1.39	3.26	2.41	1.77	1.14	1.25
S6	S2	1.27	1.64	2.26	0.95	3.18	0.86
S8	S1	1.86	3.41	1.615	1.865	2.095	2.455
S8	S2	1.685	6.015	NA	NA	NA	NA

## Sheet: %Eff_CD107a
Group	Timepoint	IgG2a	αTIGIT	IgG1	αTIM-3	IgG2a+IgG1	αTIGIT+αTIM-3
S1	S1	5.23	2.76	2.33	4.29	0.91	0
S1	S2	2.1	2.2	3.93	1.01	0.66	1.68
S10	S1	0	3.45	0.37	0.89	0.2	0.31
S10	S2	0.97	0.88	0.51	0.21	0.97	0
S19	S1	0.6	1.5	0.65	1.03	1.19	2.24
S19	S2	4.03	11.53	10.33	1.52	4.13	7.93
S20	S1	0.92	6.16	0	0.5	0.75	1.92
S20	S2	0.355	4.575	0.195	0.535	0.635	0.575
S21	S1	1.51	5.83	0.48	0	0.27	0.62
S21	S2	0.74	0.65	0.34	0.36	0.07	0
S22	S1	1.22	0.54	0.4	0.81	1.14	1.54
S22	S2	3.94	3.18	2.62	1.79	1.95	1.58
S23	S1	0.3	0.5	2.2	2.3	0	0
S23	S2	3.8	2.6	1.95	2.63	4.35	4.94
S3	S1	1.88	1.13	1.26	0.87	0.15	0.69
S3	S2	0.22	1.18	0.26	1.1	0.82	1.25
S6	S1	0.63	1.46	1.3	1.5	0.92	0.15
S6	S2	2.14	3.6	1.34	2.38	0	3.25
S8	S1	2.9	5.54	1.675	1.825	1.685	2.665
S8	S2	1.905	6.285	NA	NA	NA	NA

## Sheet: %CD8t_IFNy
Group	Timepoint	IgG2a	αTIGIT	IgG1	αTIM-3	IgG2a+IgG1	αTIGIT+αTIM-3
S1	S1	1.04	0.33	1.85	1.08	3.2	2.33
S1	S2	0.07	0.04	0.41	0.5	0.74	0.36
S10	S1	0.24	1.16	0.25	1.19	2.67	4.12
S10	S2	0.1	0	0.43	0.24	0.26	0.33
S19	S1	0.25	0	0.17	0.9	1.57	2.7
S19	S2	2.18	1.08	0.82	0.18	0	1.87
S20	S1	0.04	0.15	0.3	0.31	0.72	0.87
S20	S2	0.26	0.42	0.28	0.13	0.07	0.15
S21	S1	0.68	0.75	1.02	1.24	1.54	0.38
S21	S2	0.08	0.11	0.21	0.21	0.13	0.35
S22	S1	0.65	0.02	0.36	0.53	0.46	2.91
S22	S2	4.51	1.89	0.59	0.27	0.45	0.37
S23	S1	2.07	0.61	1.08	0.56	0	3.22
S23	S2	0	0.56	0.48	0.63	0.32	0.3
S3	S1	1.11	0	0.35	0.13	0.68	0.78
S3	S2	0.58	0.68	0	1.17	0.08	0.43
S6	S1	0.07	0.08	0	0.32	0.19	0.42
S6	S2	0	0.08	0.03	0.13	0.18	0.69
S8	S1	0.31	0.63	2.82	1.13	0.78	0.43
S8	S2	0.18	0.34	NA	NA	NA	NA

## Sheet: %CM_IFNy
Group	Timepoint	IgG2a	αTIGIT	IgG1	αTIM-3	IgG2a+IgG1	αTIGIT+αTIM-3
S1	S1	NA	0	0	0	0	0
S1	S2	0.2	0.83	0.42	0.5	0.15	0.47
S10	S1	0	3.65	1.01	3.25	0.74	2.3
S10	S2	0.76	0.86	0	0.93	0	0
S19	S1	0	0	2.13	2.5	7.58	4.48
S19	S2	1.97	1.2	0.79	0.99	0	1.34
S20	S1	0.38	1.29	1.01	0.6	0.84	1.26
S20	S2	0.745	0.345	0.505	0.005	0.175	0.525
S21	S1	4.74	2.85	4.97	2.86	4.58	1.94
S21	S2	0.92	0	0.28	1.69	0.34	0.91
S22	S1	2.31	1.08	2.77	1.33	0	NA
S22	S2	3.69	0.45	0.36	0	0.75	2.28
S23	S1	1.65	0.16	0.38	1.31	0	2.32
S23	S2	0.18	0.26	0.54	0.81	0	0.38
S3	S1	0	0	0	0	0	0
S3	S2	1.26	0.69	0.9	2.4	0.62	0
S6	S1	0	0	0	0	2.67	2.17
S6	S2	0	1.01	0	1.52	0	5.88
S8	S1	0	0	14.11	2.53	3.1	6.27
S8	S2	0	2.92	NA	NA	NA	NA

## Sheet: %TM_IFNy
Group	Timepoint	IgG2a	αTIGIT	IgG1	αTIM-3	IgG2a+IgG1	αTIGIT+αTIM-3
S1	S1	2.34	1.08	2.05	0.04	4.44	1.97
S1	S2	0.51	0	0.77	0.45	0.84	0.42
S10	S1	1.21	1.21	0.71	1.36	2.73	3.62
S10	S2	0.58	0.19	1.63	0.23	0.19	0
S19	S1	0.08	0.29	0.5	1.21	0.75	1.67
S19	S2	1.74	2.14	0.89	0	0.78	2.36
S20	S1	0.61	0.46	0.33	0.22	0.64	1.02
S20	S2	0.32	0.56	0.27	0.1	0	0.13
S21	S1	0.6	0.27	1.28	1.06	0.81	0.23
S21	S2	0.6	0.36	0.44	0.53	0.42	0.9
S22	S1	4.98	2.35	4.24	4.75	3.54	5.04
S22	S2	5.57	2.39	1.86	1.07	1.81	1.39
S23	S1	1.29	0.43	0	0.68	0.52	1.67
S23	S2	0.6	0.37	0	0.76	0.78	0.88
S3	S1	2.33	2.22	0	0	0	0
S3	S2	0.64	1.03	0	1.89	0.15	0.14
S6	S1	0.43	0.79	0	0.25	0.16	0.58
S6	S2	0.3	0	0.2	0.04	0.98	5
S8	S1	1.24	0	10.06	2.48	4.67	4.44
S8	S2	0.59	1.3	NA	NA	NA	NA

## Sheet: %EM_IFNy
Group	Timepoint	IgG2a	αTIGIT	IgG1	αTIM-3	IgG2a+IgG1	αTIGIT+αTIM-3
S1	S1	1.6	1.77	1.35	1.49	3.68	1.33
S1	S2	0.21	0.06	0.57	0.2	0.56	0.46
S10	S1	0.32	1.59	0.24	1.16	1.01	1.91
S10	S2	0.89	0.13	0.37	0.99	0.81	1.23
S19	S1	1.11	0.83	0.57	0.64	0.99	1.88
S19	S2	2.14	0	0.88	0.68	0.49	2.65
S20	S1	0	0.17	0.11	0.07	0.26	0.46
S20	S2	0.32	0.47	0.38	0.14	0	0.04
S21	S1	0.29	0.49	0.53	0.68	1.04	0.11
S21	S2	0.08	0.07	0.31	0.19	0.14	0.23
S22	S1	1.08	0.9	0.57	1.14	1.26	1.44
S22	S2	3.56	1.25	0.8	0.4	0.41	0.59
S23	S1	1.38	0.13	0.42	0.74	0.51	2.17
S23	S2	0.91	0.21	0.31	0.94	1.18	1.73
S3	S1	1.56	0	0	0	0	0
S3	S2	0.95	1.09	0	3.02	0.24	1.14
S6	S1	0.34	0	0	0.49	0.49	0.1
S6	S2	0	0.18	0.69	0.13	0.37	2.49
S8	S1	0.26	0.4	4.465	1.835	1.555	0.995
S8	S2	0.435	0.505	NA	NA	NA	NA

## Sheet: %Eff_IFNy
Group	Timepoint	IgG2a	αTIGIT	IgG1	αTIM-3	IgG2a+IgG1	αTIGIT+αTIM-3
S1	S1	0	0	3.92	0	7.5	4.76
S1	S2	0.69	0	0.15	0.12	0.76	0.76
S10	S1	0.56	0.93	0	0.38	4.49	6.08
S10	S2	0.38	0.62	1.24	0	0.61	0.7
S19	S1	0.19	0	0.27	1.12	2.04	2.24
S19	S2	3.19	1.84	1.4	0.45	0	2.49
S20	S1	0.43	0.43	0	0.56	0.33	0.15
S20	S2	0.28	0.27	0.56	0.15	0.23	0.08
S21	S1	0.67	0.43	0.67	1.15	1.13	0.33
S21	S2	0.09	0.15	0.24	0.33	0.21	0.39
S22	S1	0.44	0	0.25	0.14	0.27	4.6
S22	S2	5.06	2.58	0.22	0	0.23	0.2
S23	S1	1.81	0.24	0	0.05	0	1.94
S23	S2	0	0.87	0.4	0.62	0.23	0.65
S3	S1	0.84	0.2	0	0.08	0.96	0.55
S3	S2	0.53	0.65	0.05	1.02	0	0.39
S6	S1	0.07	0.52	0.68	0	0.43	0.75
S6	S2	0.71	0	0.45	1.98	0.64	7.32
S8	S1	2.9	1.84	9.005	2.385	3.555	3.635
S8	S2	0.835	1.425	NA	NA	NA	NA

[truncated: 5 more sheets: %CD8t_IL2, %CM_IL2, %TM_IL2, %EM_IL2, %Eff_IL2]
